# Supplementary material for: Determination and Dissection of DNA-Binding Specificity for the Thermus thermophilus HB8 Transcriptional Regulator TTHB099
Source: MDPI journal article supplement (doi:10.3390/ijms21217929), 2020-10-26
Supplement: s1 [file s1]

**A**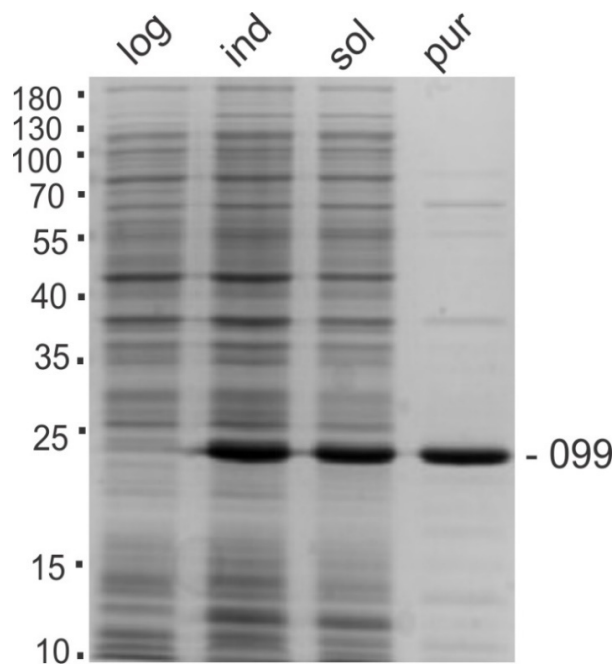**B**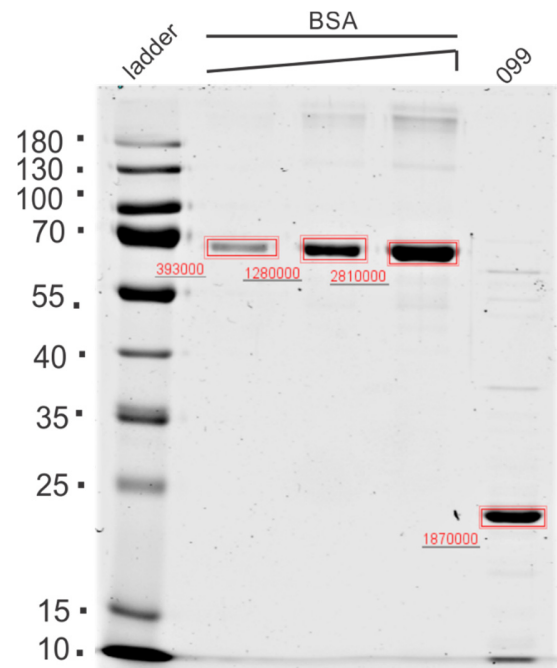

**Figure S2.** Expression, purification, and quantification of TTHB099 protein. **(A)** Shown is a Coomassie Blue G-250 stained 12% SDS-PAGE gel onto which was loaded whole cell extracts or partially purified fractions equivalent to 0.2% of the total preparation. Lanes shown left to right: (log) logarithmic growth bacteria, (ind) bacteria following IPTG-induction for 4 h, (sol) soluble proteins following sonication and centrifugation, (pur) 2.3  $\mu$ g purified TTHB099 protein. The location of molecular weight standards are indicated at the left of the figure. **(B)** Quantitative densitometric analysis of a Coomassie Blue G-250 stained 12% SDS-PAGE gel containing a BSA standard curve (left to right: 0.5, 1, 2 mg protein) and 0.5  $\mu$ L stock TTHB099. The final concentration of TTHB099 is estimated to be 50.6  $\mu$ M.
