# Supplementary material for: Determination and Dissection of DNA-Binding Specificity for the Thermus thermophilus HB8 Transcriptional Regulator TTHB099
Source: MDPI journal article supplement (doi:10.3390/ijms21217929), 2020-10-26
Supplement: s1 [file s1]

**Table S1.** EMSA quantification data.

| Lane | TTHB099 (nM) | Intensity S | Intensity T |
|------|--------------|-------------|-------------|
| 1    | 0            | -8770       | 11,600,000  |
| 2    | 0            | -1500       | 10,700,000  |
| 3    | 0.66         | 2,040,000   | 8,270,000   |
| 4    | 1.32         | 4,680,000   | 7,080,000   |
| 5    | 2.64         | 9,540,000   | 2,280,000   |
| 6    | 5.27         | 8,540,000   | 1,850,000   |
| 7    | 10.5         | 8,090,000   | 1,450,000   |
| 8    | 21.1         | 8,530,000   | 1,160,000   |
| 9    | 42.2         | 7,820,000   | 1,520,000   |

Quantitation calculations of densitometric data from Figure S2 were performed as previously described [9].  
(TTHB099) Final TTHB099 concentration in binding reaction. (Intensity S) Pixel number for TTHB099-DNA species.  
(Intensity T) Pixel number for unbound DNA.
