# Supplementary material for: Determination and Dissection of DNA-Binding Specificity for the Thermus thermophilus HB8 Transcriptional Regulator TTHB099
Source: MDPI journal article supplement (doi:10.3390/ijms21217929), 2020-10-26
Supplement: s1 [file s1]

**Table S3.** Oligonucleotides

| Name           | Sequence                                                               | Length | Purif. | Use                              |
|----------------|------------------------------------------------------------------------|--------|--------|----------------------------------|
| ST2R24         | CTAGGAATTCGTGCAGAGGTGAATNNNNNNNNNNNNNNNNNNNNNTTACCATCCCTCCAGAAGCTTGGAC | 73     | PAGE   | ST2R24 Template Precursor        |
| ST2L           | CTAGGAATTCGTGCAGAGGTGAAT                                               | 24     | Desalt | PCR Left Primer                  |
| ST2Ls          | CTAGGAATTCGTGCAGAGGTGA                                                 | 22     | Desalt | PCR Left Primer Short            |
| ST2R           | GTCCAAGCTTCTGGAGGGATGGTAA                                              | 25     | Desalt | PCR Right Primer                 |
| IRD7_ST2R      | /5IRD700/GTCCAAGCTTCTGGAGGGATGGTAA                                     | 25     | HPLC   | 5'-IRDye700 PCR Primer           |
| ABC01_ST2R     | CCATCTCATCCCTGCGTGTCTCCGACTCAGCTGCAAGTTCGATGTCCAAGCTTCTGGAGGGATG       | 64     | PAGE   | Fusion PCR Primer                |
| trP1_ST2L      | CCTCTCTATGGGCAGTCGGTGATCTAGGAATTCGTGCAGAGGTGA                          | 45     | PAGE   | Fusion PCR Primer                |
| A_uni          | CCATCTCATCCCTGCGTG                                                     | 18     | Desalt | PCR Primer                       |
| trP1_uni       | CCTCTCTATGGGCAGTCGG                                                    | 19     | Desalt | PCR primer                       |
| IRD8_trP1_ST2L | /5IRD800/CCTCTCTATGGGCAGTCGGTGATCTAG                                   | 27     | HPLC   | 5'-IRDye800- modified PCR Primer |
| Bio_ST2R       | /5BiodT/GTCCAAGCTTCTGGAGGGATG                                          | 22     | HPLC   | 5'-biotinylated PCR primer       |
| REPSAis        | CTAGGAATTCGTGCAGAGGTGAATCGTCATAGAATTCGTTACCATCCCTCCAGAAGCTTGGAC        | 63     | PAGE   | REPSAis control DNA precursor    |
| ST2_099_wt     | AGGAATTCGTGCAGAGGTGAATTGTATTCTAGAATACATTACCATCCCTCCAGAAGCTTG           | 65     | Desalt | TTHB099 consensus probe          |
| ST2_099_wt_m1  | AGGAATTCGTGCAGAGGTGAATGGTATTCTAGAATACATTACCATCCCTCCAGAAGCTTG           | 65     | Desalt | TTHB099 mutant 1 probe precursor |
| ST2_099_wt_m2  | AGGAATTCGTGCAGAGGTGAATTTTATTCTAGAATACATTACCATCCCTCCAGAAGCTTG           | 65     | Desalt | TTHB099 mutant 2 probe precursor |

|                      |                                                              |    |        |                                                    |
|----------------------|--------------------------------------------------------------|----|--------|----------------------------------------------------|
| ST2_099_wt_m3        | AGGAATTCGTGCAGAGGTGAATTGAATTCTAGAATACATTACCATCCCTCCAGAAGCTTG | 65 | Desalt | TTHB099 mutant 3 probe precursor                   |
| ST2_099_wt_m4        | AGGAATTCGTGCAGAGGTGAATTGTCTTCTAGAATACATTACCATCCCTCCAGAAGCTTG | 65 | Desalt | TTHB099 mutant 4 probe precursor                   |
| ST2_099_wt_m5        | AGGAATTCGTGCAGAGGTGAATTGTACTCTAGAATACATTACCATCCCTCCAGAAGCTTG | 65 | Desalt | TTHB099 mutant 5 probe precursor                   |
| ST2_099_wt_m6        | AGGAATTCGTGCAGAGGTGAATTGTATACTAGAATACATTACCATCCCTCCAGAAGCTTG | 65 | Desalt | TTHB099 mutant 6 probe precursor                   |
| ST2_099_wt_m7        | AGGAATTCGTGCAGAGGTGAATTGTATTTTAGAATACATTACCATCCCTCCAGAAGCTTG | 65 | Desalt | TTHB099 mutant 7 probe precursor                   |
| ST2_099_wt_m8        | AGGAATTCGTGCAGAGGTGAATTGTATTCAAGAATACATTACCATCCCTCCAGAAGCTTG | 65 | Desalt | TTHB099 mutant 8 probe precursor                   |
| ST2_099_0080(0081) p | AGGAATTCGTGCAGAGGTGAATTGTGTTTTAGTTTACTTTACCATCCCTCCAGAAGCTTG | 60 | Desalt | <i>TTHA0080(0081)</i> promoter DNA probe precursor |
| ST2_099_0030p        | AGGAATTCGTGCAGAGGTGAATTGTGTACGAAATTACATTACCATCCCTCCAGAAGCTTG | 60 | Desalt | <i>TTHA0030</i> promoter DNA probe precursor       |
| ST2_099_0506(0507) p | AGGAATTCGTGCAGAGGTGAATTGTTTTCAAGATACATTACCATCCCTCCAGAAGCTTG  | 60 | Desalt | <i>TTHA0506(0507)</i> promoter DNA probe precursor |
| ST2_099_0132(0133) p | AGGAATTCGTGCAGAGGTGAATTGTAAGGGAGAATAAATTACCATCCCTCCAGAAGCTTG | 60 | Desalt | <i>TTHA0132(0133)</i> promoter DNA probe precursor |
| ST2_099_C002(C003) p | AGGAATTCGTGCAGAGGTGAATTGTGAGTTATCTCACTTTACCATCCCTCCAGAAGCTTG | 60 | Desalt | <i>TTHC002(C003)</i> promoter DNA probe precursor  |
| ST2_099_B088(B089) p | AGGAATTCGTGCAGAGGTGAATGGTAGCCTGGACCACATTACCATCCCTCCAGAAGCTTG | 60 | Desalt | <i>TTHB088(B089)</i> promoter DNA probe precursor  |
| ST2_099_0647p        | AGGAATTCGTGCAGAGGTGAATGGTAGCCAGGGATACATTACCATCCCTCCAGAAGCTTG | 60 | Desalt | <i>TTHA0647</i> promoter DNA probe precursor       |

|                      |                                                              |    |        |                                                          |
|----------------------|--------------------------------------------------------------|----|--------|----------------------------------------------------------|
| ST2_099_1833p        | AGGAATTCGTGCAGAGGTGAATTGTAGGCCAGGCCACGTTACCATCCCTCCAGAAGCTTG | 60 | Desalt | <i>TTHA1833</i> promoter<br>DNA probe precursor          |
| ST2_099_0641p        | AGGAATTCGTGCAGAGGTGAATCGTGTCCTGAACACATTACCATCCCTCCAGAAGCTTG  | 60 | Desalt | <i>TTHA0641</i> promoter<br>DNA probe precursor          |
| ST2_099_0645p        | AGGAATTCGTGCAGAGGTGAATTGTGCCTTTGGCCACATTACCATCCCTCCAGAAGCTTG | 60 | Desalt | <i>TTHA0645</i> promoter<br>DNA probe precursor          |
| ST2_099_1911(1912) p | AGGAATTCGTGCAGAGGTGAATTGTACTTGAGCATACCTTACCATCCCTCCAGAAGCTTG | 60 | Desalt | <i>TTHA1911(1912)</i><br>promoter DNA probe<br>precursor |
| ST2_099_B003(B004) p | AGGAATTCGTGCAGAGGTGAATTGTAGCCCAGGCCAAATTACCATCCCTCCAGAAGCTTG | 60 | Desalt | <i>TTHB003(B004)</i> promoter<br>DNA probe precursor     |
| ST2_099_0201(0202) p | AGGAATTCGTGCAGAGGTGAATTTTGTATACGCCACATTACCATCCCTCCAGAAGCTTG  | 60 | Desalt | <i>TTHA0201(0202)</i><br>promoter DNA probe<br>precursor |
| ST2_099_0374p        | AGGAATTCGTGCAGAGGTGAATAGTGATGTAACTAAATTACCATCCCTCCAGAAGCTTG  | 60 | Desalt | <i>TTHA0374</i> promoter<br>DNA probe precursor          |
| ST2_099_0326p        | AGGAATTCGTGCAGAGGTGAATTGTGTTGCAGGACCCATTACCATCCCTCCAGAAGCTTG | 60 | Desalt | <i>TTHA0326</i> promoter<br>DNA probe precursor          |
| ST2_099_1626(1627) p | AGGAATTCGTGCAGAGGTGAATGGTATGGGAAGCTACATTACCATCCCTCCAGAAGCTTG | 60 | Desalt | <i>TTHA1626(1627)</i><br>promoter DNA probe<br>precursor |
