# Supplementary material for: Determination and Dissection of DNA-Binding Specificity for the Thermus thermophilus HB8 Transcriptional Regulator TTHB099
Source: Int J Mol Sci. 2020 Oct 26;21(21):7929. doi: 10.3390/ijms21217929 (PMC7662524; doi:10.3390/ijms21217929)
Supplement: Supplementary file 1 [file ijms-21-07929-s001.zip]

Archive with 7 entries (7 files):
- Data S1.txt
- Data S2.txt
- Figure S1.pdf
- Figure S2.pdf
- Table S1.pdf
- Table S2.xlsx
- Table S3.pdf
