# Supplementary material for: Determination and Dissection of DNA-Binding Specificity for the Thermus thermophilus HB8 Transcriptional Regulator TTHB099
Source: Int J Mol Sci. 2020 Oct 26;21(21):7929. doi: 10.3390/ijms21217929 (PMC7662524; doi:10.3390/ijms21217929)
Supplement: Supplementary file 1 [file ijms-21-07929-s001.zip › Data S1.txt]

>D8PAK:00004:00035
AATAGGATTGTAAGATGGAGCACT

>D8PAK:00005:00024
TTGTAACGTAGATTACAAACTTTC

>D8PAK:00005:00033
AATACGACAGTGTCCCTTAATACA

>D8PAK:00006:00025
CTAAAGTTTGTGCGCCCGACCACA

>D8PAK:00006:00029
ACAATCTTTGTATGCTATCTTACA

>D8PAK:00007:00016
ACGAAACTTGTGGCCCCGGCTACA

>D8PAK:00007:00036
ATTTGGATTGTAGCGGAGTGCACA

>D8PAK:00007:00047
CCGCCAATTGTGGCCTCCATTACA

>D8PAK:00007:00049
CTTGCAATTGTAAGTTGGGATACT

>D8PAK:00009:00028
ACTTAATTGTACCTTGGAATACAC

>D8PAK:00010:00014
GTGCCGATTGTAGTCTATGTCACG

>D8PAK:00011:00028
CACAGATTGTGACCGGCGTCACAA

>D8PAK:00012:00010
GACCGACTTGTATCCCAGGGTACA

>D8PAK:00012:00017
TTGTATGCCGGGCTACAATGCCTT

>D8PAK:00012:00041
TCAAACTATGTAGGCCCCAATACA

>D8PAK:00013:00030
GAGGATTGTGTCGTAGGCTACACC

>D8PAK:00013:00037
ATTTATCATCCAGACTAGCTACCC

>D8PAK:00015:00021
ATTTTGATTGTAATCTGCGATACG

>D8PAK:00015:00023
TACTGTATTAGGGCATACAATCTA

>D8PAK:00016:00014
ACCTTTTGTAGTCTGCAATACATT

>D8PAK:00016:00019
TTTTAGATTGTGCTATGTAATACT

>D8PAK:00016:00032
GGCCACTTTGTGGTCCGACTTACA

>D8PAK:00016:00045
CGTGCTTTTGTATTATGGACTACT

>D8PAK:00017:00009
CGGGCTACATCATCCTCTGGCGAG

>D8PAK:00017:00011
ACCAAAACTGTGAGATATGCTACA

>D8PAK:00017:00018
CTAATCATTGTACTATGCGATACA

>D8PAK:00017:00023
AGTAAATTGTATCGTTACATACAA

>D8PAK:00017:00034
AACCGTACTGTGTTCTGGCGTACA

>D8PAK:00018:00012
GTCACATTTGTGGCCCAGCACACA

>D8PAK:00018:00032
TCCATATTGTATTGTAGACTACAT

>D8PAK:00018:00035
ATTTGGATTGTAAGCGAGGCTCCA

>D8PAK:00018:00042
TAGGGGATTGTAGCGCTGCCTACA

>D8PAK:00019:00005
TCCTGAACTGTACTCTGGCATGCA

>D8PAK:00019:00006
GTGTAGCCTAGCATACAATTCATG

>D8PAK:00020:00009
CAGTTAATTGTGATCTGTGTCACT

>D8PAK:00020:00019
AGCGGAAAAGTGTTGCAGACCACA

>D8PAK:00020:00040
GGCGCGACTGTGGCCCACACTACA

>D8PAK:00020:00043
ACTGAAGTGTATCCTATGTTACAT

>D8PAK:00021:00009
TGTAAGAATGTGGGCCGAGCCACA

>D8PAK:00021:00013
TGCCTGTTTGTAGGTTGGACTACA

>D8PAK:00021:00043
GGGAAGACTGTACTCTCGACTACA

>D8PAK:00024:00019
CTCAATTTGTAATCTGGGATACAA

>D8PAK:00024:00025
CCACGATATGTATTGTACAGCACA

>D8PAK:00024:00031
GACGGAACTGTGACCCAGGCAACA

>D8PAK:00025:00021
AACTAACATGTATTCTTGCCTACA

>D8PAK:00025:00048
GCCATAACTGTAATTCAAATCACA

>D8PAK:00026:00010
TACTACTATGTATTGCACGCCACA

>D8PAK:00026:00021
GTATGTGTCCTGTAATACATTCTT

>D8PAK:00026:00047
TTGTATCCTCAAATACAAATGAGT

>D8PAK:00027:00013
TTGTAGTCTCGATCACAATTCGAC

>D8PAK:00027:00026
ATGAGGTTTGTATTTGGGAGTACA

>D8PAK:00027:00036
CCGAACAATGTAACACAGAATACG

>D8PAK:00028:00020
GCCTAGATAGTGGCGAGGGCTACA

>D8PAK:00029:00015
TGTATTGTAGGACACATTCCAGAC

>D8PAK:00030:00027
GACATAATTGTAATCCCGAATACC

>D8PAK:00032:00014
TTATTTTTGTATCCTAGCTTACAG

>D8PAK:00033:00043
GATAGAATGTAGCTCTGCATACAG

>D8PAK:00033:00049
TCAACTGTATGAAGGCATACAATA

>D8PAK:00034:00044
CTGTAACCCACAATACAATTTTCA

>D8PAK:00036:00005
GTCGTGATTGTATTCCGGGCTACC

>D8PAK:00036:00030
CATTAAAGAGTAGTCGGGGTCACA

>D8PAK:00036:00038
ACCAGACTTGTGTCCTCCGATACA

>D8PAK:00036:00049
TTTAGAATGTATCCCCCGACACAT

>D8PAK:00037:00045
AGTCCAATGGTGTGCCCGCATACA

>D8PAK:00038:00030
TCAGCTTTTGTAGGCCAGCATACA

>D8PAK:00039:00009
TTGTAGCCTGGAATACATAAAGTT

>D8PAK:00039:00019
CCTAAGTTTGTAGTCCAGGGCACT

>D8PAK:00039:00038
GTCATAAAAGTAGTCCATGCTACA

>D8PAK:00041:00047
ATGTATCCCAAACTACAGTTTGTA

>D8PAK:00042:00007
CTGTATGCCAGGCTACGTTTTTTA

>D8PAK:00044:00025
GTCTCCAGTGTGTTCTGCGACACA

>D8PAK:00044:00026
ATTTAAATTGTACCTTGGCTTACA

>D8PAK:00044:00045
GAATTGTGTCCCCCGTTACAATTA

>D8PAK:00045:00025
GCCTAGAATGTGACGCAGCATACT

>D8PAK:00045:00035
AACAGTTTGTATCCTATGATACAT

>D8PAK:00046:00011
TCTTCAATTGTATGCTGGCATAAC

>D8PAK:00047:00045
TACGGTACTGTATTATAGACCACA

>D8PAK:00049:00036
TTGTAAGCCCAAATACAATTTGTA

>D8PAK:00005:00084
TTTTAGTTTGTGGTCAGGGATACA

>D8PAK:00005:00092
TTGTGGCGCCGATTACATTCCCTT

>D8PAK:00005:00093
ATTTTTCCTGTGTCCTGCCCTACA

>D8PAK:00007:00097
CTGTGTCCCAGCGCACAATCTACT

>D8PAK:00010:00058
GTTGGAATTGTAACCTACAACACT

>D8PAK:00011:00051
ATATTGTTTGTATTACAGAGTACA

>D8PAK:00011:00079
CATGTCTTTGTGACTCGGAATACT

>D8PAK:00011:00088
CCCGCCATCTCATCCGAGGGCAAC

>D8PAK:00011:00089
ATTTGGATTGTATTATCAAATACT

>D8PAK:00012:00067
AAATCGTTTGTAGCCTTCGCCACA

>D8PAK:00013:00056
CGAGGCCCGTCATCCGAGAGGTGT

>D8PAK:00013:00061
TTGTGCTCCAGGTCACAATCTTGG

>D8PAK:00014:00078
ACTTGAAGTGTGCTAGGGGACACA

>D8PAK:00015:00067
TTGTATTCCCCCTTACATTCCTCC

>D8PAK:00015:00072
TATCCGTTTGTAGCTTAACATACA

>D8PAK:00016:00051
CTCGTGATTGTGCCCCCGAATACA

>D8PAK:00016:00068
ATTCATAATGTGAGGTGTGCTACA

>D8PAK:00016:00089
GTCCACCCGACATCCCGTGGGACA

>D8PAK:00017:00064
AGGGAATTTGTATGCCAAATCACA

>D8PAK:00017:00092
AAAAATCATGTATCCTGAGTTACA

>D8PAK:00017:00094
CGCACCTTCGTGTGCTAGACTACA

>D8PAK:00018:00050
CTGGTAATTGTATTGTAAACTACT

>D8PAK:00018:00076
TCCCGAATTGTATCCTGAGCTCCA

>D8PAK:00019:00081
TTTTCCAATGTGTTCTAGGACACA

>D8PAK:00019:00098
GTGGAGACTGTACTCGGGATTACA

>D8PAK:00020:00052
GTGCCACTTGTAGTACAGACTACA

>D8PAK:00020:00068
GTCCTAAATGTATCCGGCGTCACA

>D8PAK:00020:00077
AAATACTTTGTATCTTGGGGCACA

>D8PAK:00020:00079
GATCAACTGTGAGCTGGACTACAA

>D8PAK:00021:00093
CTATGACTGTAGTCCCGAATACAT

>D8PAK:00022:00052
TTTTTTCGTAATTAGCACTACAAT

>D8PAK:00022:00098
TTGGTAATGGGGCTACACAATTGT

>D8PAK:00023:00055
TACTGGATTGTAGCCCAAAACACA

>D8PAK:00024:00077
ACTGCGTTTGTATGGTAGGACACA

>D8PAK:00025:00053
TTGTGCTCCACGATACAATCCTAG

>D8PAK:00025:00055
GTTTCGACTTGTAATGCAGCATAC

>D8PAK:00025:00057
ATGTAAGCCATGCTACAGTTTAAT

>D8PAK:00025:00060
GATTAATCGTAACCTGGGCCACAT

>D8PAK:00025:00077
TTATAATTGTATCGTACCCTACAG

>D8PAK:00025:00082
ATTTTTTCTGTAACCTATGTTACA

>D8PAK:00025:00083
TTGTGTCGTGGACTACATTGTTTC

>D8PAK:00026:00055
TGCTTAAATGTATTCTCGGTCACA

>D8PAK:00027:00080
GTTCGTATTGTAATCGACGCTACA

>D8PAK:00027:00083
ATAATGATTGTATCCCCCACCACA

>D8PAK:00028:00050
TCAATAACTGTAATTCAGGTCACA

>D8PAK:00028:00081
AAATGAATCGTGTCCTAACCTACA

>D8PAK:00028:00089
ATTGTCGAGCCATCCAGGCAGGGT

>D8PAK:00029:00075
CGCCCGGCACCATCCTCTGTCCTA

>D8PAK:00031:00092
TTTCAGTCTGTAGTCCAAAACACA

>D8PAK:00032:00092
TCTCTATCTGTATGATAGAGCACA

>D8PAK:00033:00065
ATCGAGAACGTATTCTGTAATACA

>D8PAK:00033:00070
TTGTATGTTGGGACACAATTCCTA

>D8PAK:00034:00061
CCAACGATTGTATGATAGAACACA

>D8PAK:00034:00080
ATGTAGCCTCGACTACAATCCCCT

>D8PAK:00034:00091
ATGTATTCCCGGATACACTTCTTA

>D8PAK:00034:00097
ATCAGAATTGTATTATAACATACT

>D8PAK:00035:00063
CCTGTAATTGTAGCATACCATACG

>D8PAK:00036:00052
GTCAGAATTGTGCCTTGGACCACT

>D8PAK:00036:00091
CAAAATAACGTGACCTGTATTACA

>D8PAK:00037:00080
AATTACACTGTATCTTGGGCTACA

>D8PAK:00038:00074
GAGCTGTTTGTACTCTACCATACA

>D8PAK:00038:00075
TAGTGTCCTATGCTACACTTTGAC

>D8PAK:00038:00099
GATGACATTGTATCCCACGTTACT

>D8PAK:00039:00098
CCAATAATTGTAACGTGCATCACT

>D8PAK:00040:00086
GTTTTAATTGTATCCTAGACACAT

>D8PAK:00040:00095
ACCATCATACATCCGCGCGTTCCG

>D8PAK:00041:00063
TTGTAGTCCATGACACTATGTGTA

>D8PAK:00041:00074
AGCTTGTTTGTAGCCTACACTACA

>D8PAK:00042:00078
CTGATTGCGTCATCCGGAGTCTAG

>D8PAK:00042:00082
GCCAAGTTTGTAGTCCGTATTACA

>D8PAK:00042:00096
ACCCCCCAAGCATCCATTTGTGGT

>D8PAK:00042:00097
AACAACAATGTACTACAAGATACA

>D8PAK:00043:00050
CCTTGCATAGTAACCTGCACCACA

>D8PAK:00043:00071
GAGACAACTGTGGCCTGGGCTACT

>D8PAK:00045:00089
AAAAAAATTGTAGCCCAGGTGACG

>D8PAK:00046:00063
TAATTTTCTGTAATCTAGAACACT

>D8PAK:00046:00093
TAACGATTTGTAAGCTCCACTACA

>D8PAK:00047:00053
ACATGAATTGTAATCTCAAATACA

>D8PAK:00047:00064
CAGTTGTAGACATGCAATACAGTT

>D8PAK:00047:00073
TCAACAATTGTGAGCCCCGCTACA

>D8PAK:00048:00068
TTGTGCCCCAGAACACATATTCGC

>D8PAK:00049:00066
GTAAATAATGTGAGCTGGGATACT

>D8PAK:00049:00075
AACGCCCACTCATCCAGTCAGAAC

>D8PAK:00049:00097
TGAAAATAGTAGTCCTAGATCACA

>D8PAK:00005:00107
GTCACGATTGTATTGGGTCATACG

>D8PAK:00005:00117
TTTTAAAACTGTATTACAGGCCAC

>D8PAK:00005:00122
GTTTGTATTACAGGTCACACTTAT

>D8PAK:00005:00128
CCCAGGTTTGTAAGCCTGGCTACA

>D8PAK:00006:00100
TAGTATATTGTAACCTAGAATACA

>D8PAK:00006:00101
TTCTAATTTGTATTCCCTCCTACA

>D8PAK:00007:00139
ATCGGATTTGTAATCCCAGGCACA

>D8PAK:00008:00112
ACTGTAATTGTATGCTGGGACTCT

>D8PAK:00008:00120
AGTTCATTTGTATTCCAGGTGACA

>D8PAK:00009:00136
TCACCAATTGTAGCATAGCCCACT

>D8PAK:00009:00146
CATAAGATTGTATCCGCGCAGACA

>D8PAK:00010:00105
CCCAAACTGTGACCTGTGTTACAA

>D8PAK:00010:00122
TTGTATTCAGGCATACAATTAGCG

>D8PAK:00010:00138
AGATAATCCGTATCCTGGATCACA

>D8PAK:00010:00146
ACGTAGAACGTAACTCAGACTACA

>D8PAK:00011:00125
AAGTAATTTGTATCATGGCGTACA

>D8PAK:00011:00127
TGATAGTGTCCCAGGCTACACTTC

>D8PAK:00011:00136
GAGTACTCTGTAGTTTGGATTACA

>D8PAK:00011:00146
ATGTAACCTGGGTCACAAATTCAT

>D8PAK:00013:00115
GACTGCATTGTACGTTGCGCTACA

>D8PAK:00013:00139
GACACCTTTGTGATCCAGAATACT

>D8PAK:00013:00146
CAAAAGATTGTACGATAGAACACG

>D8PAK:00014:00102
AGCCGACATCCTGATGATTGCAAC

>D8PAK:00014:00106
GTCTTATATGTATTCCATGCTACA

>D8PAK:00014:00119
TGTTCTCTTGTATTCTGGCCTACA

>D8PAK:00014:00135
AGGGAGTTTGTATCCCTACATACA

>D8PAK:00014:00144
TCTACTTTGTATGCTACAATACGA

>D8PAK:00015:00125
CTGTATCCTAGGACACACTTCGAG

>D8PAK:00016:00111
CCGTAACTGTGACCTAAGCTACAT

>D8PAK:00016:00141
CTTGAAAATGTAATCTGTCATACA

>D8PAK:00017:00111
TTGTAACCCAGGACACACTTATAA

>D8PAK:00017:00135
TAGTTATTTGTAGTATGGACTACT

>D8PAK:00018:00110
ATACAAATGTATCCCGTAATACAC

>D8PAK:00018:00116
ACTTATATTATATGTTCCGCTACA

>D8PAK:00018:00138
GCGCTCTCTGTAGCTTGGCATACT

>D8PAK:00019:00107
GCCAAAGAAGTAGTCCAGAGCACA

>D8PAK:00019:00115
TACCAAAATGTAACCCGAGTTACA

>D8PAK:00019:00134
TGAAGATTGTGGCCCTAATCACAC

>D8PAK:00021:00129
GACAATTGTGTTGCACGTTACACA

>D8PAK:00022:00109
ATTATGTTTGTGATCTGGCTTACA

>D8PAK:00022:00129
CGGTTGTTTGTATCCCGGGCTACG

>D8PAK:00022:00132
TTGTAGCCTAGAATACGGAACGTT

>D8PAK:00023:00141
TCTCAGATTGTACGCTGAGTTACT

>D8PAK:00024:00101
CCAAACTTTGTAGTTCCAGCTACA

>D8PAK:00024:00102
ATACGAACTGTATCGCAAGATACA

>D8PAK:00024:00137
ATTTGAAAGTGTAGGCTGACATAC

>D8PAK:00026:00116
ACAACTTCTGTAACTGGGAATACA

>D8PAK:00026:00125
ATGTATTCTACGATACATTTCGTC

>D8PAK:00028:00103
GATATGTATGTATCATGGGATACA

>D8PAK:00029:00108
AGCGCTTTGTAGCCCAGGTTACAA

>D8PAK:00029:00136
ATGTAGTTCCCGCTACAGTCTTTG

>D8PAK:00031:00129
TACTGATTTGTATTCCAGGTCACA

>D8PAK:00032:00111
TTGTAGCGTACGATACATTCTATT

>D8PAK:00033:00127
AAATTTTTGTAGCCCACACTACTT

>D8PAK:00033:00131
AACTCAACTGTATTGTGAAATACA

>D8PAK:00033:00137
CCTGATTGTATCATGCGACACAAA

>D8PAK:00033:00143
TTCGTGAATGTAATCTACATCACA

>D8PAK:00033:00147
TTTCAACATGTGCCCCCGCGTACA

>D8PAK:00034:00126
AAAATAATTGTAATCTATAATACT

>D8PAK:00034:00129
GGTTTCTCTGTAGCCTGCGCCACT

>D8PAK:00036:00122
TCCTGAATAGTATGTAGGCACACA

>D8PAK:00037:00106
CTTTTATTTGTATGTTCCGCTACA

>D8PAK:00039:00102
CCAATTGTGTGCTAGAATACATCT

>D8PAK:00039:00140
GTCTCCATTGTATGCTGCGTTACT

>D8PAK:00039:00146
CGAACGTTTGTAGCCCCAGTTACA

>D8PAK:00040:00131
TTGTAGATTGTGACCCATGTTACT

>D8PAK:00040:00140
GCTCAGAATGTGGCGCGCGACACA

>D8PAK:00041:00119
TTTTAGATTGTGTGTTACCTTACA

>D8PAK:00041:00120
ATTTAATTTGTACGTTGAGCCACA

>D8PAK:00041:00137
ATTGAAACAGTATTATGACTTACA

>D8PAK:00042:00116
TAGTGGTGTGGGACACATTTGGGA

>D8PAK:00042:00127
CGCCATTTGTGACCTGCGCTACTA

>D8PAK:00042:00147
CCATAGACTGTAGCGTAAGACACA

>D8PAK:00044:00118
ATCTAAATTGTAACCCAGGTTACT

>D8PAK:00045:00106
TTGTAATTTAGAATACAGTTACTA

>D8PAK:00045:00125
GGTCTAATCGTAAGCTGGAACACA

>D8PAK:00046:00112
ATAGGCTTTGTGCCCTACACCACA

>D8PAK:00046:00138
CGCCCATTTGTATCCCAGGCTACA

>D8PAK:00047:00118
TCCCAATACGTATTCTAAAATACA

>D8PAK:00047:00127
CAAATTGTATTCCAGATCACAAGT

>D8PAK:00047:00145
ACTGGATTTGTGTTGTAGCCTACA

>D8PAK:00048:00102
TACAATTTTGTATTCGTCAATACA

>D8PAK:00048:00128
CGCTAAAATGTAGCCCAGATTACA

>D8PAK:00049:00126
TTGTATGATGACATACAATTTTTA

>D8PAK:00004:00192
TAGTAAATTGTACGCTAACATACG

>D8PAK:00005:00192
ATTTCGATTGTATACTACAATACG

>D8PAK:00005:00197
TCACTAAATGTATTGCAGACTACA

>D8PAK:00006:00190
AATGAAATGTGAGCTGTACCACAC

>D8PAK:00007:00176
TTTACAAATGTGGTGCAAGCTACA

>D8PAK:00007:00188
TTGTATCCCACGGTACAAATAGAT

>D8PAK:00008:00157
CAAGTGTGTCGCACACTACACTTT

>D8PAK:00008:00185
CTTTGAATTGTAGTGTACATCACC

>D8PAK:00009:00199
TTGTAGGCTGAGATACAATGCGTT

>D8PAK:00010:00167
CTTTGTAGCCTCGGATACATAGTT

>D8PAK:00010:00187
AAAACCACTGTAGCCTACCATACA

>D8PAK:00011:00157
AAAACTTTGTATGGCAGAATACAT

>D8PAK:00011:00191
CGTTCTCGGTCATCCTTTGCTCCG

>D8PAK:00011:00194
TTGTATCACAGACCACACTATCGG

>D8PAK:00012:00165
CGATTGTGTCCTAGCTTACTTTCT

>D8PAK:00012:00183
GAAGTGTTCGTAACCTGCGCCACA

>D8PAK:00012:00189
TTGTATTCCATAATACAGTCACTA

>D8PAK:00012:00191
CCCACAATTGTAGCCTAGGCTAAC

>D8PAK:00013:00179
CTCAATCTTTGTAACTTACAATAC

>D8PAK:00013:00182
TACATCTTTGTGCTCTGAACCACA

>D8PAK:00013:00185
TTGTATCCAGTAATACATTCAACA

>D8PAK:00013:00191
ACAGTATTGTATGCAAGCATACAA

>D8PAK:00013:00196
TTGTAACTCAAATCACAGTTCAAC

>D8PAK:00014:00160
GTGTGTCCTAGGCTACACTTAAAA

>D8PAK:00014:00163
GACTCAATTGTGACGCTCGCTACA

>D8PAK:00014:00167
CTAACGATTGTGGTTGACAATACA

>D8PAK:00014:00191
AGAGGGATTGTAACGCAGCATACC

>D8PAK:00014:00194
AAAGCAATTGCATTCTGGCTTACA

>D8PAK:00015:00160
TCTCTTTATGTAATCCAAGTCACA

>D8PAK:00016:00153
GCGGTCAATGTAGTCTGTATCACA

>D8PAK:00017:00179
AAATCTGTACGCTAGATTACAGTC

>D8PAK:00017:00181
TTCCCGACAGTAGTCCCCAATACA

>D8PAK:00017:00184
ACGCGGATTGTGACCTTGGATACA

>D8PAK:00018:00154
AATTAATTGTGGTCTGTACTACAC

>D8PAK:00019:00181
ATCCGGTCTGTGACCTGAGGCACA

>D8PAK:00020:00154
TTTTGTGTAGTCCAGACTACACAT

>D8PAK:00020:00159
AGAATTGTAGCCCGGACCACATGT

>D8PAK:00020:00161
TTGGCTTTTGTGTGCTAGATTACT

>D8PAK:00020:00167
TTTGTAATTGTGGCTTACAGTACA

>D8PAK:00021:00195
TTTTGTCTAGCATCCAGCGCCTCT

>D8PAK:00022:00163
TTCACCTTTGTGCGCTGCGCTACA

>D8PAK:00022:00179
TTATTGTATTCCACGATACAGAAA

>D8PAK:00022:00187
TTCTGGTTTGTAGCTTGCATCACT

>D8PAK:00023:00156
TCACGAAATGTGACGCACCCTACA

>D8PAK:00023:00158
TTGTAGTCTGTACCACAATCGCGA

>D8PAK:00024:00181
GTTCTTACCTCATCCTAAACTTTT

>D8PAK:00025:00188
TCATCAATTGTAGCCGGGAGCACA

>D8PAK:00026:00153
TTGTAATCCAGACTACAATAGCGT

>D8PAK:00026:00154
GGCCCGTTTGTATCTCACGTTACA

>D8PAK:00026:00189
TTGAAAATTGTATCCCTGGCCACC

>D8PAK:00027:00163
CGAAAGATTGTGAGCTATGACACA

>D8PAK:00028:00161
GTACAATCTGTATTCGCCGATACA

>D8PAK:00028:00165
GCTAACTTTGTACGCCAGAGTACA

>D8PAK:00028:00194
GCCTTGATTGTAGTCTAAGTCACA

>D8PAK:00028:00197
AACAAAATCGTGGCCCAGAATACT

>D8PAK:00029:00150
TTCAGGATTGTGTCTCGCATCACA

>D8PAK:00029:00178
GCTCTAATTGTGACCTGCATCACA

>D8PAK:00030:00152
TTGGATTTTGTATTCTGAATTACA

>D8PAK:00030:00175
CATTCAATTGTACGCTACCTTACA

>D8PAK:00031:00174
TTTTCGATTGTAAGCTCAATCACA

>D8PAK:00031:00193
TTGTGTTCCCGAGTACAATTGCCC

>D8PAK:00031:00199
TTTAGGAATGTGTGATAGGTTACA

>D8PAK:00032:00153
AGTCGTATTGTAGCCTACACTACA

>D8PAK:00032:00160
TAAGGCAATGTATGCTAAACTACA

>D8PAK:00032:00165
GTCCTACTTGTATCCCTCGTCACA

>D8PAK:00032:00168
TATATAACGTCATCCGTCTCCGAG

>D8PAK:00033:00177
ACCTGGCCCTCATCCGACGCTGGT

>D8PAK:00034:00182
TAGGAGAATGTATTCCACAGTACT

>D8PAK:00034:00193
GTACCAAATGTATGGTAGCTTACA

>D8PAK:00035:00164
GTAAACAATGTATGCTGTATCACA

>D8PAK:00035:00166
AATAACTCTGTAGCCCGGCCTACA

>D8PAK:00035:00181
CTCTCAAAAGTGCCCTAAGTCACA

>D8PAK:00035:00192
TATGACTTTGTATGTTAAACCACA

>D8PAK:00036:00171
CAAAAGATTGTACGATAGAACACG

>D8PAK:00036:00176
TCACAGTCTGTAGTCTAGGGCACA

>D8PAK:00037:00167
CTACGCACTGTGTTCTATCCCACA

>D8PAK:00037:00193
CTTTTTTGTGGCGCAAGCTACAGG

>D8PAK:00037:00194
AACGTCTTTGTAACCTAGTGCACA

>D8PAK:00038:00151
ACCATATGCGCATCCCTACCGCTA

>D8PAK:00038:00183
GACTCAATTGTATTTCTCACTACA

>D8PAK:00040:00153
ACTCGATGTGTATGCTGGCATACG

>D8PAK:00040:00165
ATATCAAATGTATCGCAGAATACC

>D8PAK:00041:00157
CACCTAATTGTAAGTCACGTTACA

>D8PAK:00041:00183
TAATTACTGTGACCCAGCATACAC

>D8PAK:00042:00153
TTGTAATCCAGCATACAAACATTA

>D8PAK:00042:00161
ATCTTATTTGTGCCTTAGGGTACA

>D8PAK:00042:00199
GTAGACTTTGTACCGTGGCTTACA

>D8PAK:00043:00152
AATTACATTGTATTCCTCATTACA

>D8PAK:00043:00160
TTGTAGCCTGCATTACAATCACTG

>D8PAK:00043:00163
AATGGAATTGCATCTTGGGCCACA

>D8PAK:00043:00170
CTTCAAAACGTAATCCACACTACA

>D8PAK:00044:00174
TAGCTTTTTGTAGCGCGGACCACA

>D8PAK:00045:00163
CTATAATTTGTAACCTAGGTCACT

>D8PAK:00046:00167
GTAAACCTTCCATCCAACAACTCT

>D8PAK:00047:00178
TTGTATGCCGCCCTACAATTCATT

>D8PAK:00047:00181
GTCTGTTTCGTATGCTGGGCTACA

>D8PAK:00048:00155
TTCAGATTGTGGTCCAACCTACTA

>D8PAK:00048:00175
ACTCGTATTGTACCCTAGCACACA

>D8PAK:00049:00150
ATGTGGCCTAGCATACATATGAAA

>D8PAK:00004:00221
AGCTAATAGTGGCGCAGGATACAA

>D8PAK:00004:00222
TTGTGGTGTGCAATACAATAGTTA

>D8PAK:00004:00247
GTCTATGCCCCATCCACTTTGCAG

>D8PAK:00005:00231
AAGCAAAACGTAAGCAGGACCACT

>D8PAK:00006:00202
CTCATAATTGTGACCCAGCGTACC

>D8PAK:00007:00233
TACTTTGTGCCCAGGCCTACAGTC

>D8PAK:00007:00242
GCCACAATTGTATCGCAGCACACA

>D8PAK:00008:00247
TGCCCATTTGTAGCCTAGCACACA

>D8PAK:00009:00213
ATGTAAATGTGTTCCACGCTACAA

>D8PAK:00009:00239
TAAAAATCTGTATTCCCCGCCACA

>D8PAK:00010:00208
TTTTGGACTGTAGTGGAGGTTACA

>D8PAK:00010:00216
CGCAGAAATGTAGGCCGGACTACT

>D8PAK:00010:00225
TGTGAAGTGTACTATGGGACACAC

>D8PAK:00010:00246
GGTCTAATTGTATGCTGTGACCCA

>D8PAK:00011:00227
TGATGATATGTATGCTGTATTACA

>D8PAK:00011:00238
CTCTTTATTGTATTGTAGGTGACA

>D8PAK:00011:00240
AATTAATTTGTGTTCTTGATCACA

>D8PAK:00011:00244
TTGTGCTCCTCAATACAATCATAT

>D8PAK:00012:00202
GGTTACTTTGTGTCTTGTGCTACA

>D8PAK:00012:00210
CACTTAATTGTAATATACGATACA

>D8PAK:00012:00232
ATCTGAACTGTATCCGGGAGCACA

>D8PAK:00012:00234
ACTTAGATTGTGTTCTGTATTACA

>D8PAK:00012:00242
ACAAGAATTGTATCATACCCCACA

>D8PAK:00013:00219
ATAGATTGTACTGTCGCCTACAAT

>D8PAK:00014:00203
TAGTCGATCGTAACTTAAAATACA

>D8PAK:00014:00205
TTTTTATTTGTATCCTATGCTACG

>D8PAK:00015:00203
TTGTGCCCCAGAATACAATCCGAT

>D8PAK:00015:00207
AGCCAGATTGTAACCGACGCCACA

>D8PAK:00016:00210
GGCAGAAAAGTAATCCACGATACT

>D8PAK:00016:00231
GTGTGTCCTGGATCACAATTTTAA

>D8PAK:00017:00206
GCTCACTTTGTAACATAGCATACA

>D8PAK:00017:00212
AATATCTTTGTACTTCACGATACA

>D8PAK:00018:00220
GGATGAATTGTAGTCCAGGATAAC

>D8PAK:00019:00220
ATGGAGACTGTGGGCCCGCATACA

>D8PAK:00019:00237
CGTTCAATTGTGCCCTGGACTCCA

>D8PAK:00019:00244
TGTATGCTACGATACAATTTAGTG

>D8PAK:00019:00249
GTGTATCCTACGCCACATTTAAAA

>D8PAK:00020:00209
ATCTAAAACGTATTCCCGGCTACT

>D8PAK:00021:00233
GCAATCTCTGTATGTTGGGATACA

>D8PAK:00021:00240
GCCTAAAGTGTGTCTTAAGTTACA

>D8PAK:00021:00246
CGGGAGATTGTAGTGCGCAATACT

>D8PAK:00022:00202
TCCTCAACTGTATCGTAGCATACT

>D8PAK:00022:00204
CTATATGTATCGCAGCCCACAATA

>D8PAK:00022:00220
TGTCAACAAGTGGCCTGGGATACA

>D8PAK:00022:00235
GCCTCTGCTCATCCTGTTATGTGT

>D8PAK:00025:00200
GGAAAATAAGTATCCTAGATCACA

>D8PAK:00026:00204
CCAACAACTGTGTCCCCGAGCACA

>D8PAK:00026:00218
CTTGCGTTTGTATTGTACAATACA

>D8PAK:00026:00247
ATGTATTGTGGGCTACAATATGAA

>D8PAK:00027:00200
CGGTTAAACGTATTCGAAGATACA

>D8PAK:00027:00206
GAATTGTGCCATCCGCTACAATGC

>D8PAK:00028:00203
GTTTGAATTGTGGTCCAAGCTTCT

>D8PAK:00029:00229
AAATATGTGTCCTAGAGCACAGTT

>D8PAK:00029:00245
ATGTATTACAGGCCACACTTAGAT

>D8PAK:00029:00249
ATGTATCCTGCGCTACAATTCTAG

>D8PAK:00030:00209
GGAGGATTTGTGATCCAGGTCACT

>D8PAK:00030:00233
TTAGGAAATGTGACCCAGAATACC

>D8PAK:00030:00235
TTTTGCATTGTATTACCCAACACA

>D8PAK:00030:00247
ATGTGGATTGTGACCTGAGCTACT

>D8PAK:00031:00200
TGTTACATTGTATGACCGGATACA

>D8PAK:00031:00201
TTCGCGACTGTAACATACAGTACA

>D8PAK:00031:00214
TTGTAAGCGTGGATACAATCTATC

>D8PAK:00031:00220
CCTAAGAATGTGACCTAGGGCACT

>D8PAK:00032:00216
GTTAGATTGTATTGTATGATACAC

>D8PAK:00032:00221
TTGTAACTTGCACTACATTTACGG

>D8PAK:00033:00202
GTATAAATCGTATCCTGCGCTACA

>D8PAK:00033:00223
CTTTTAACCGTGACCTACAATACA

>D8PAK:00035:00207
GTGCTAACTGTGACCTAGACTACT

>D8PAK:00035:00229
TTATAACTGTGGTCCAACATACAG

>D8PAK:00035:00230
CCTATTCGACCATCCGACGCAATA

>D8PAK:00035:00243
ATATCGAACGTGTCATGGGATACA

>D8PAK:00036:00216
GTGTATTACAGAATACGTTTGACA

>D8PAK:00036:00241
ATTCCAATTGTATCTTAAACGACA

>D8PAK:00036:00245
CTCTTAATAGTATTAACGCATACA

>D8PAK:00036:00246
AACCTAATTGTACGTTAGCTCACT

>D8PAK:00037:00246
CTGTATCCGGGACTACTATTTCCA

>D8PAK:00038:00206
AAATTTTGTAATTTACGCTACAGT

>D8PAK:00039:00218
GGCCCTCATTCATCCTACACCTTC

>D8PAK:00039:00220
TTCGAGAAAGTGTTTTGGACTACA

>D8PAK:00039:00227
ATGTATCCTGTAATACAACATTCT

>D8PAK:00040:00211
CACCATCCGGGTTTGTGACCCATC

>D8PAK:00040:00225
ATCCTAAGTGTAACCAGGCGTACA

>D8PAK:00040:00231
AACAGGATTGTATGCTCCGGCACA

>D8PAK:00040:00236
AACAAATGTAGCGCAGAATACGGA

>D8PAK:00041:00200
TAGTGACCTACGCCACTATTACGA

>D8PAK:00041:00210
GACACGACTGTGCACCAGGTCACA

>D8PAK:00041:00247
GACCCAACTGTATTACTGCCTACA

>D8PAK:00043:00213
TATCTGTATCCTAGCATACAATCC

>D8PAK:00044:00208
TCAACAATAGTAGGACAGAATACA

>D8PAK:00044:00220
TTGTGGCCCAGGATACAGTTCCGC

>D8PAK:00045:00204
TACGTTTACTGTACCTCGCCTACA

>D8PAK:00045:00205
AGACCGATAGTGGCCCACGCTACA

>D8PAK:00046:00248
TGCTAATCTGTGCTGCAGCATACA

>D8PAK:00047:00219
TATTGTAGTCTAGCGCACACTCGC

>D8PAK:00047:00228
TTGTATTCTAGATTGCAATCTCCA

>D8PAK:00048:00224
TATTGAATTGTGGCCTGTCATTCA

>D8PAK:00048:00225
AGAATGTATTACAGGTCACAGTAT

>D8PAK:00048:00249
TTTCTGATTGTGCTATGCAATACC

>D8PAK:00049:00216
TCCATGATTGGGCCTTATACTACA

>D8PAK:00049:00218
CCTATACTGACATCCGGACGGGAT

>D8PAK:00049:00225
TTGTATGGTATATTACACTCTCGA

>D8PAK:00004:00273
GAGTTAATTGTATGATACGTTACA

>D8PAK:00004:00274
GCAGAAATAGTACTGCAAGACACA

>D8PAK:00004:00278
TCGTGAATCGTGCCTTGGGACACA

>D8PAK:00005:00281
GGACCATTTGTAGGCTGCGGTACA

>D8PAK:00005:00292
CTCTCATTTGTAGCCTGTGCCACG

>D8PAK:00005:00298
ACTTCGATTGTATTACCGATTACA

>D8PAK:00006:00259
ACAACAAAAGTGTTCTGGAATACT

>D8PAK:00006:00264
ACCGATGTAGCGATCGATCCACAA

>D8PAK:00006:00273
GATAACACCTCATCCGGGCACGTT

>D8PAK:00006:00289
ACCGAATCTGTGATCTGGAATACA

>D8PAK:00007:00280
GTAATGATTGTAACCTGGGGTACA

>D8PAK:00007:00292
ACTCGATGTGTGTCCTACAACACA

>D8PAK:00008:00257
TTGTATTCGAGCATACAATCGATT

>D8PAK:00009:00263
CAATTGTATCCCAGATGACAATTG

>D8PAK:00009:00264
CAACTACTTGTAGTGCACGATACA

>D8PAK:00010:00250
TTCTAATAGGTATGCTGGCTTACA

>D8PAK:00010:00261
CGGGAGATTGTGTCATAAACCACA

>D8PAK:00010:00269
GGAACGAAAGTAACCTGGCTTACA

>D8PAK:00010:00290
GACAAAATTATAGTCCAGGCTACA

>D8PAK:00010:00298
CCTAATGTGTCATCCGTTCAAGCA

>D8PAK:00011:00270
AAAAATATTGTGCCTTACAACACA

>D8PAK:00011:00276
AAGGAACATGTGTGCCGTAATACA

>D8PAK:00012:00258
TTGTGTTCTGAGTTACAATTATTG

>D8PAK:00012:00294
ACTGTACCTCTCATCCCGATGAGA

>D8PAK:00013:00256
AAACCGATTGTAAGGTAGAATACT

>D8PAK:00013:00271
TAAGTTTTTGTATGTAAGAATACA

>D8PAK:00013:00283
ATTTAACTTTGTATCGCAGCTTAC

>D8PAK:00013:00296
TATAGAAATGTGTGCTGGACTACA

>D8PAK:00014:00278
TCCAATTTTGTAATCCAGATCACT

>D8PAK:00015:00256
TTGTAATCCGGGCTACAGTTTTAT

>D8PAK:00016:00281
CCAAAGATTGTAACGAAGACTACA

>D8PAK:00016:00283
ACAGGAAATGTACTCTATACCACA

>D8PAK:00017:00257
TAGAGGATTGTGACCTAAGCTACA

>D8PAK:00017:00264
TTTTAAAGTGTAGCTTAAGCCACA

>D8PAK:00017:00278
TTGTACTGCACGTTACGGTTGCTA

>D8PAK:00017:00283
TACAAATGTGACTTAGCATACCTT

>D8PAK:00019:00263
CTTCCGACTTGTAGTGCAGACCAC

>D8PAK:00019:00284
TTCATACTATCATCCAAAAGATCT

>D8PAK:00020:00269
GCTTCAATAGTATTCTGGGCTACT

>D8PAK:00020:00294
CCTGAATCTGTAACGTAGGCTACA

>D8PAK:00021:00266
AATTGAATTGTAATCCACAACCAA

>D8PAK:00021:00285
CGCTAAATTGTAACCCAAGCTACA

>D8PAK:00022:00295
GACATTGTATCCTACGTTACTAAT

>D8PAK:00023:00293
GATCGAATGTGGTGCAAGATACAA

>D8PAK:00023:00297
GTTCTATTTGTGCCTTGTATTACA

>D8PAK:00024:00263
CGTTTTCGTGACCCACGCTACAAT

>D8PAK:00024:00287
AGTCTTATTGTAACCTAGGACACT

>D8PAK:00024:00295
CCCCACACTGTGTTCCACGTCACA

>D8PAK:00025:00264
CAATGTAGTCTAGAATACTATCTT

>D8PAK:00025:00284
AATAAAATTGTGACGCCGACTACT

>D8PAK:00026:00259
TCGTAATGTGTATTGTGCAATACA

>D8PAK:00026:00265
TAGGAATTGTATGCGACGCTACAG

>D8PAK:00026:00274
GGCTAGTATGTAACGTGGGACACA

>D8PAK:00026:00275
TTGTATTCCAAGCTACTATTTTAT

>D8PAK:00027:00261
AATAATATGTGCCCCAGCTTACAG

>D8PAK:00028:00289
TGTGCATCCAAATTTAGACTCAGC

>D8PAK:00028:00297
CGCACAATTGTATCCTGCTTTACA

>D8PAK:00029:00265
CTAACGCACCCATCCATGCCCTGA

>D8PAK:00029:00284
TAAACAATTGTCACCCAACATACA

>D8PAK:00031:00252
AAGGAAAACGTAATCCGCGATACA

>D8PAK:00031:00257
CGTGGAATCGTAGTCTACAATACA

>D8PAK:00031:00260
TTGTAGGCCATATTACATTCAGGC

>D8PAK:00031:00263
AACTAATATGTAGCCTGCGATACG

>D8PAK:00031:00289
TTCATCATTGTATGCTGTGCTACT

>D8PAK:00032:00270
GAATGTATCCGTCATCACACTCTC

>D8PAK:00032:00289
AGTTGATGCCATCCACAATGTTCA

>D8PAK:00033:00264
ATTATTATTGTATGGCAGCATACG

>D8PAK:00033:00276
CTCAGGAACGTGTGCCAGACTACA

>D8PAK:00033:00282
TCCCGCTTTGTATTCTGGGCTACC

>D8PAK:00033:00284
GTTGAAATTGTAGGTTCCACCACA

>D8PAK:00034:00285
TGATCATTGTATGCCGTAATACTA

>D8PAK:00035:00259
TGCGGATTTGTATCCTCCCATACA

>D8PAK:00035:00296
CCTACGAATGTGCTGTACGATACA

>D8PAK:00036:00262
GTTGGAAATGTCAGCTGTAATACA

>D8PAK:00036:00279
ATTGCGATTGTAGTATATGCTACT

>D8PAK:00037:00253
AGGCCAAAATGTAACCGGGGATAC

>D8PAK:00037:00256
TTGTATCCTGCAATACAGTGTTTC

>D8PAK:00037:00288
AAGAAAATTGTACGTTGACATACA

>D8PAK:00037:00292
TTTATAAATGTGCTCTGCACTACT

>D8PAK:00037:00293
CATTCGATTGTATCCTGTAATACT

>D8PAK:00037:00297
ACGCTAATCGTAGTTTGGACTACA

>D8PAK:00038:00272
TTTTCGTTCGTGACGTAGAATACA

>D8PAK:00039:00269
TATAACGCCCATCCAGTTGTCTAA

>D8PAK:00039:00286
CCGAGTATGTAACGCAAGTACACA

>D8PAK:00040:00289
CAAGCGAGTGTATTCCACAATACA

>D8PAK:00040:00298
TACAAAATTGTGTCCCTGACCACA

>D8PAK:00041:00292
TAAGAGATTGTATTGTATGATACG

>D8PAK:00042:00259
TCGCTGAATGTATCCTAGCATACG

>D8PAK:00042:00272
ATGTGACCTATACTACAATCCTAT

>D8PAK:00042:00279
CACGTACTTGTAATCCAGACTACT

>D8PAK:00042:00285
CTTTGTTTTGTATGGCATATTACA

>D8PAK:00042:00286
CACTAAATTGTGCACTATCATACA

>D8PAK:00043:00263
AATACGAATGTATTCCACGGTACA

>D8PAK:00043:00272
TTAGTTATTGTAGTCCGCCTTACA

>D8PAK:00043:00295
CTCCAGTGTGCCCTGGGACACACT

>D8PAK:00044:00272
GGACTAACCGTGCGCCAGCATACA

>D8PAK:00044:00278
AATAACTTGTAGCCTGTACTACAC

>D8PAK:00044:00287
AACGCGTTTGTACCGCAACATACA

>D8PAK:00044:00295
CCCAGAAATGTAAGCCCGACTACA

>D8PAK:00044:00299
CACAACACTGTAATCCAGCTTACC

>D8PAK:00045:00264
GAACTTTTTGTAATCTGAGATACA

>D8PAK:00045:00282
GTGTTTTATGTAAGCCCGGATACA

>D8PAK:00047:00281
TGTATGATTGTGGGCCAGATTACA

>D8PAK:00048:00269
TGTCCAATTGTATCTCAAATTACT

>D8PAK:00048:00285
AAGTGGTCCAGCATACACTTTTTC

>D8PAK:00004:00336
TTTCCAACAGTAGGCTAAGATACA

>D8PAK:00005:00316
TTTACGATTGTAGCATATATTACA

>D8PAK:00005:00322
GCGGCCTGTGTATGCTACGCCACA

>D8PAK:00006:00310
GCATAGTTTGTATTACAGGCCACA

>D8PAK:00007:00335
TCGGGATTGTAGTCCACACCACTT

>D8PAK:00007:00348
CCACCGATTGTGCTCTCCAATACA

>D8PAK:00008:00317
CCGAAGTATTGTGTGCGTCATACT

>D8PAK:00008:00323
TCGATGATTGTATTCGGCACTACT

>D8PAK:00009:00323
TTGTAGCATAGCATACACTGATTA

>D8PAK:00009:00325
CTCGAAACTGTATTGGGGTGCACA

>D8PAK:00009:00335
TCTGCGATTGTATTCGTGGATACA

>D8PAK:00010:00313
GACATTGTGACTCAGAATACATAT

>D8PAK:00010:00327
AACCTAGAAGGTATTCCAGACTGC

>D8PAK:00010:00341
TTGCACATTGTATTGAAGCCTACA

>D8PAK:00012:00314
CTCTACTTTGTATGCTGGGATACT

>D8PAK:00012:00337
AAACCAGTTGTAGTCTAGCATACA

>D8PAK:00013:00316
GTTAAGCTAGCATCCACGTTGTTC

>D8PAK:00013:00334
CAGCACGTACATCCACCAGACGTC

>D8PAK:00014:00300
TTGCCGATTGTGACCGGGACCACA

>D8PAK:00014:00302
TTATACCATTCATCCGGTATGATA

>D8PAK:00014:00304
GTTAAACCAACATCCAACTCCCCC

>D8PAK:00014:00325
TTAGTGATTGTGATGTGAGATACA

>D8PAK:00015:00302
ATTTAGAATGTGCGCCGCAATACA

>D8PAK:00017:00319
ATCACAATGCATCCGTACAACTAC

>D8PAK:00017:00331
GCTACAATTGTGTCCTGGGTCTCA

>D8PAK:00017:00343
CCGAGGAATGTGTACTGGCCCACA

>D8PAK:00018:00322
CTGTGGGCCACAACACAATTTTCT

>D8PAK:00018:00334
ATTTTATTTGTAGCTAGGAACACT

>D8PAK:00019:00301
TTTTAAATTGTATTCTCGCCCACA

>D8PAK:00019:00311
TTGTATTATGGCCTACAGTCTGAT

>D8PAK:00019:00324
AATAGTGTATGCCAGACTACATAA

>D8PAK:00019:00327
TCGTTTTCTGCATCCCCTTAACTT

>D8PAK:00019:00339
AAAGATTGTAGCAGAGACTACTCA

>D8PAK:00019:00343
CAAAAATGTGTATGCGTAACCACA

>D8PAK:00020:00301
AAGTGTGTAACCTAGACTACAGTT

>D8PAK:00020:00318
GATAGAATTGTATGCTGGGATACT

>D8PAK:00021:00316
GCGCAGATTGTATCGCACGCCACA

>D8PAK:00021:00336
TTGTATTCAGGGATACAATTTCTA

>D8PAK:00021:00349
GATAGGTTTGTGGCCTGTATTACA

>D8PAK:00022:00300
CATTAGATTGTAGCGTGCAGTACA

>D8PAK:00022:00311
GGCTGGTTTGTAACCTCAGATACA

>D8PAK:00023:00327
GATCCAATTGTGTCCCCCACTACA

>D8PAK:00024:00307
TTTAAGATTGTAACCAGCTATACA

>D8PAK:00024:00312
TTGTGGCCTCGGTCACAATAAGGA

>D8PAK:00024:00320
CCCAGTTCTGTATTCCGTACTACA

>D8PAK:00024:00328
GCTTCGATTGTAGTCCGCACCACA

>D8PAK:00025:00309
GGATAATTTGTAGCGCAAAGCACA

>D8PAK:00025:00317
ACCTAAATAGTAAGTTGGACCACA

>D8PAK:00025:00328
TTTTGAATTGTAGTCTTCACTGCT

>D8PAK:00025:00349
TGTCAAGTTGTAGTCCCGATTACA

>D8PAK:00026:00339
TAACAGAATGTAACCTATATCACA

>D8PAK:00026:00346
ATTTTCACTGTGTCCTATCCTACA

>D8PAK:00027:00343
CATAGAAATGTATCTCTGGATACA

>D8PAK:00028:00307
CCCTTAAATGTATTGGTGACTACA

>D8PAK:00029:00335
CTGAGATGGTCATCCATGTCACAA

>D8PAK:00030:00327
TTCGAGTTTGTATGCAGGGTTACA

>D8PAK:00031:00326
CTTGAGAATGTGTCCCCTAATACA

>D8PAK:00031:00335
CCAGAAAATGTGCACTAGCTTACA

>D8PAK:00032:00311
AAAATGATTGTATTACACCTCACA

>D8PAK:00032:00343
GGTTGAAATGTATTGTAGGACACC

>D8PAK:00033:00315
GTCGAGATTGTGACTCCAGCTACA

>D8PAK:00033:00318
AACTGTCATCCGGTCATATCGGAA

>D8PAK:00033:00320
CCTAAGTAAGTATGCCCGGTCACA

>D8PAK:00034:00319
AATCGGACCGTGATCCAGATTACA

>D8PAK:00034:00345
TTGTAACCTGCGTCACATTGCCAA

>D8PAK:00035:00307
CCGAATTTTGTAACCTGTAATACA

>D8PAK:00035:00332
ATTTGCATTGTGCTTCATAATACA

>D8PAK:00036:00315
TATGGGACTGTAGTGTCGACTACA

>D8PAK:00036:00329
CTAAATGTAGCCCAGAGCACATCA

>D8PAK:00037:00322
GGTGAATGTGTAAGCTCGAATACA

>D8PAK:00037:00326
TGCTGAATTGTATCCTTCACTACG

>D8PAK:00037:00342
CGCGGGATTGTATCTTGGGCCACA

>D8PAK:00038:00315
TACACAAATGTATTCTGGCTTACT

>D8PAK:00038:00330
GTAAATATAGTATCCTATCCTACA

>D8PAK:00039:00320
TGTAAGACTGTATCATAGGATACA

>D8PAK:00039:00322
CCCTAATTTGTACGCCTGGGCACA

>D8PAK:00039:00329
TCCGAATTGTGTTTTACAATACAA

>D8PAK:00039:00340
TCCACGTCTGTGGTCTAGAACACA

>D8PAK:00040:00320
ATAAAATTTGTGGTGCTTGCTACA

>D8PAK:00040:00343
ATCCAACCTGTATTGTAGAGTACA

>D8PAK:00041:00337
ATATAAATTGTGTCTCAGCATACC

>D8PAK:00042:00300
GTTGCCTTTGTAATGTACGATACT

>D8PAK:00043:00306
AGCTCATTTGTACTCTCGCCTACA

>D8PAK:00043:00307
ATCCCTATTGTATGATAGCATACA

>D8PAK:00043:00327
ATCCTAAATGTATCCTAGGCTACG

>D8PAK:00044:00308
TTATACATTGTAATTTACCCCACA

>D8PAK:00045:00327
ATAATAGTGTACTCTAGACTACAA

>D8PAK:00045:00340
GACTAGACTGTGCCTTGCAACACA

>D8PAK:00046:00302
TCGTAATTGTAGTTCAGCCCACAT

>D8PAK:00046:00320
AATGGGTTTGTGGCCCAGGCTACG

>D8PAK:00047:00303
GATATCTTAGTATTCCAGCATACA

>D8PAK:00047:00304
AAGTAGATTGTATCGCAGCTTAAT

>D8PAK:00047:00331
TAGTTTTTTGTGACCCATGCTACA

>D8PAK:00047:00344
ATGTAGACCGTATCCTGAGCCACA

>D8PAK:00048:00303
AAATGTGTATTCCAACCCACAATT

>D8PAK:00048:00320
TGAACGTTTGTGAGATAGATCACA

>D8PAK:00048:00335
TCCGCGAATGTGCTCTAGAACACG

>D8PAK:00049:00326
ACTAGAATTGTATTCTAGGTCACA

>D8PAK:00049:00334
TTGTATCCCCAACTACAATTACGT

>D8PAK:00049:00340
TTACACTTTGTAACATACACTACA

>D8PAK:00049:00342
TCCTAGTTGCATCCGCGTGATATC

>D8PAK:00005:00375
CTCGGTGCTTCATCCGGTAGTGTA

>D8PAK:00005:00385
TTCCTAGAATGTGGTGCAGCCCAC

>D8PAK:00005:00388
TTGCTTCTTGTATCGCTACATACT

>D8PAK:00006:00380
TGATTGTATTCTATATCACAATTG

>D8PAK:00006:00392
CTGTAGGCTACAATACAGTTGACG

>D8PAK:00006:00394
GAACTTCTTGTAGCCTCGCATACA

>D8PAK:00006:00395
CGTCTCCTACCATCCTACTAGACA

>D8PAK:00008:00381
CTCAGCATTGTACCCTAAGTCACA

>D8PAK:00010:00353
GTAAAATTTGTAATGTAGATTACA

>D8PAK:00010:00391
AACTAGTTCGTGGTCTGGACCACA

>D8PAK:00011:00362
TTGTGCTCTGGCTTACTATGTTCG

>D8PAK:00012:00397
TTGTAAATTGTGACCCTGCATTCA

>D8PAK:00013:00355
CTATAGAGTGTATGCTTACATACA

>D8PAK:00013:00360
TGATAAAATGTGTCCACTAATACA

>D8PAK:00013:00377
CGCACGGGAGCATCCGTTAAGTGT

>D8PAK:00013:00384
CAACTGTATCTTAGCATACAATTC

>D8PAK:00014:00350
ACGCACAATGTAACCCTGGATACA

>D8PAK:00014:00353
GGAATAATTGTGGTCTCCGTTACA

>D8PAK:00015:00350
GGTATAATTGTAGTCCCTGCCACA

>D8PAK:00015:00363
TCCTCGATTGTATCTTGGAGTACA

>D8PAK:00015:00377
TCTTTATTTGTACGCTGTATTACA

>D8PAK:00015:00396
GAGCTATTGTAGCCGAGACCACAC

>D8PAK:00016:00358
ACCACGACTGTATCCGTCGCCACA

>D8PAK:00016:00389
CATAAAACTGTGGGCTATGGTACA

>D8PAK:00016:00398
TTGTGATCTAAGTCACATTTGGAT

>D8PAK:00017:00353
AATTTTCTGTATTCTACGCTACTA

>D8PAK:00017:00363
TACGTGATTGTATGCTTGAATACG

>D8PAK:00017:00374
TTGCGAACTGTATTCAGGATTACT

>D8PAK:00017:00383
GATGTTTTAGTAGTCTACGATACA

>D8PAK:00017:00397
GTGCCGATTGTAGTTCGTGTTACA

>D8PAK:00018:00365
AGCGGCTTTGTAGTGTACAGTACA

>D8PAK:00018:00370
GTCATAAAAGTAGTCCATGCTACA

>D8PAK:00018:00392
AGTACCTATGTATCCTGTATTACA

>D8PAK:00019:00361
AGTCCGTTTGTATGCGTGTGCACA

>D8PAK:00019:00369
AAATAGATTGTACGCTGAACCACT

>D8PAK:00019:00370
ACGGGTTTTGTATTCCAACTTACA

>D8PAK:00019:00374
CATTTTGTAGCCTACACTACAAAT

>D8PAK:00019:00377
TTGTAATATGTATTGTGGCGCACA

>D8PAK:00019:00387
GTCCTAAAAGTGGTCCTCGACACA

>D8PAK:00020:00384
AATACGATTGTAGTTGCCGACACA

>D8PAK:00020:00399
TTCTACATTGTAACCCAGGTCACA

>D8PAK:00021:00389
CTGTATTTCGGCATACAATCACTG

>D8PAK:00022:00364
AAAAAATGTATTAACGATTACAAA

>D8PAK:00022:00386
TTGTATGTTGTACTACACTTTTGT

>D8PAK:00023:00391
TTGTATTCTGTGACACTATTTATT

>D8PAK:00023:00392
AACCTAAATGTATTGCGCGCTACA

>D8PAK:00023:00393
ACTGGAATTGTATCCTCAGCCACC

>D8PAK:00024:00365
AATAAACTGTGTCCGAGGACACAT

>D8PAK:00024:00366
TGCTTTTTTGTATTCTACAGCACA

>D8PAK:00024:00387
TTGTAACCCCGCATACTTTTTTAG

>D8PAK:00024:00398
TTGTGACCTAAGTCACATTTGGAT

>D8PAK:00025:00357
CTAAAATCTGTATGCGGGATTACA

>D8PAK:00025:00372
GTTGGCTTTGTAGTCTATGTTACA

>D8PAK:00025:00379
ACCGAATATGTGAGCTACCATACA

>D8PAK:00025:00388
ACCTCTAAAGCATCCACCCTACCT

>D8PAK:00026:00360
TTGTATTCTAAGATACAGTTCGAA

>D8PAK:00026:00363
ATAACAATTGTGCTGTAGAACACA

>D8PAK:00026:00399
ATGTGGGTTGGGCTACAATTCATA

>D8PAK:00028:00369
AAGTAGCTTGTAAGCTAGGATACA

>D8PAK:00028:00377
ATAAATCCTGTAGTCCCGGCTACA

>D8PAK:00028:00378
AGTGAGATAGTAGTTGAGGCCACA

>D8PAK:00028:00386
GTGAAATTTGTAATATGGGCTACA

>D8PAK:00028:00391
CATTCGATTGTATCCTGTAATACT

>D8PAK:00028:00394
AATCGAATTGTATATCACACCACA

>D8PAK:00028:00396
TAGTATTCTGGACTACTATTCAGG

>D8PAK:00029:00389
CGTCCATTTGTATTCCTTATTACA

>D8PAK:00029:00399
AATGATTGTAACCGCGCTTACACA

>D8PAK:00030:00365
TTGTATTCTGCGTCACAGATGGTG

>D8PAK:00030:00379
ACCCCAATTGTGAGCTAACATACA

>D8PAK:00030:00391
AATTGGACTGTGCTTCCTAATACA

>D8PAK:00031:00375
TAAAATTGTAATCCGTACTACGAG

>D8PAK:00032:00364
ATTTTTTCTGTAATCCATGTTACA

>D8PAK:00032:00378
TTTAAAATTGTATCTTAGAGCCCA

>D8PAK:00032:00388
TCGGAGTTTGTATGCCTGCATACG

>D8PAK:00032:00393
GTCTACTCTGTAACGTAGGATACA

>D8PAK:00033:00377
TTCCACATTGTAGTGTAGACTACC

>D8PAK:00033:00383
TCTGTCCGACCATCCTTGAAGTAT

>D8PAK:00034:00368
CATAAGACAGTATTCTGACATACA

>D8PAK:00034:00379
CGACCAATTGTGACCCAGGCAACA

>D8PAK:00035:00389
AACTAAATTGTCATGCAGGCTACA

>D8PAK:00035:00396
TGTCACATTGTGACTGGGACTACA

>D8PAK:00036:00353
TTGTGGTGTGGACCACTTTTGGCG

>D8PAK:00036:00362
TTTTGATTTGTATGCCAGATTGCA

>D8PAK:00036:00384
TTGTGATCGGGGACACAGTCTGGT

>D8PAK:00037:00353
ACGTAAACGGCATCCATGTGGTGT

>D8PAK:00037:00361
TACGTGACTGTATCCTCGATTACA

>D8PAK:00037:00368
TTGTGTCTTAGGTTACAGATGAGT

>D8PAK:00037:00370
TTGTGCCCCTGACTACAATCTTCC

>D8PAK:00038:00383
CATCGAATTGTATGTTACTGCACA

>D8PAK:00038:00384
CGACCGGGGTCATCCACACTCGCC

>D8PAK:00039:00368
TGCTTATTGTAACTTAGGCCACAT

>D8PAK:00039:00375
TTGTAGTTTGGCATACACATTTGT

>D8PAK:00039:00392
GAAATTTTGTGACTTACAATACAA

>D8PAK:00040:00354
ATGTGGCTTGAGCTACAATCGCTA

>D8PAK:00040:00360
CTGGCCATTGTATCCTAGCACACA

>D8PAK:00040:00363
CCTCTGAATGTAAGCTGGATCACT

>D8PAK:00041:00380
TTAGTCTTTGTATGCGTGCTTACA

>D8PAK:00041:00381
TTGTGTCCCAGCCTACATTTGCTT

>D8PAK:00041:00383
GCCCCGTTAGTATGCTAGGCCACT

>D8PAK:00042:00382
CAACCAATCGTAGTATAGCATACA

>D8PAK:00043:00364
ATGTATGCTGGAACACATTGGGGC

>D8PAK:00043:00371
TTGTATTACATCCTACATTATGTG

>D8PAK:00043:00386
GTACAATCTGTATTCGCCGATACA

>D8PAK:00043:00388
ACGGCAACTGTATTTTACACTACA

>D8PAK:00043:00390
CCGGTCTTTGTATCTTGTACTACA

>D8PAK:00044:00378
TTCGCTAATGTATGATGGCCTACA

>D8PAK:00044:00391
TTGTAGCTCTCGCTACAATCGGCA

>D8PAK:00045:00387
CACAGACTTTGTAGCGGAGAATAC

>D8PAK:00046:00358
ATATTGATTGTAGTCTACTTCACA

>D8PAK:00047:00355
TTGTAATCAGGGCTACAAATAAAT

>D8PAK:00047:00360
TTAAATAGTAAGCCAGCACACATA

>D8PAK:00047:00367
AATTTGATAGTAGCATAGATTACA

>D8PAK:00047:00381
CTTAACATTGTGAGCCGCAATACA

>D8PAK:00048:00373
TAGTATTCTAGGTCACAATAATCG

>D8PAK:00048:00397
TTCCTTATTGTATCCCAAGCCACA

>D8PAK:00048:00399
CGAAATATTGTATGATGGCTTACC

>D8PAK:00049:00353
TTGTATTGCTCGCTACAATATTCC

>D8PAK:00049:00383
ACTAAGTTAGTACTCCAGGTCACT

>D8PAK:00049:00387
CAACGGTTTGTATTCTCGGACACA

>D8PAK:00049:00394
CTCTAACTGTGGTCTGCGCTACAA

>D8PAK:00005:00412
TTCCACATTGTAGTGTAGACTACC

>D8PAK:00006:00412
ATCCCGATTGTGATGCCAATTACA

>D8PAK:00007:00436
CGCCAAACCTGTAGGCCAACATAC

>D8PAK:00007:00442
GAAGTATTTGTGCCTCCGACTACA

>D8PAK:00009:00421
CGCTCAACTGTGCCTCACCATACA

>D8PAK:00010:00448
TATTAAATAGTATGTTGGGTCACA

>D8PAK:00011:00440
TCAAAGTCTGTAGCCCACGCTACT

>D8PAK:00012:00407
TATGCAACTGTAACGATCGATACA

>D8PAK:00012:00418
ATATTAAATCATCCTCCCTGATCG

>D8PAK:00012:00426
CTTCGATTTGTAACGTGGACCACA

>D8PAK:00012:00447
ATTTGAATTGTAGCCTAAACTAAG

>D8PAK:00012:00448
CTGTAAGCCTGGTTACAAACTTAC

>D8PAK:00013:00430
GATTGTATCCCAGACTACTAATTG

>D8PAK:00014:00413
TATAACAATGTAGTCTAGTGCACA

>D8PAK:00014:00417
ATTTGTGTCGCGAAATACACTTTT

>D8PAK:00017:00429
GACAAATTGTGACGTAAATTACAT

>D8PAK:00017:00438
CTTATCTTTGTATCCTGGCATACT

>D8PAK:00018:00410
TTATAGTTTGTACTCCCCGCTACA

>D8PAK:00018:00432
ATTTTAATTGTATCAGCGGTCACA

>D8PAK:00019:00410
ATTAGAATTGTATCTTGGCTCACC

>D8PAK:00019:00413
AAGTAGTACGGACTACAATCTTGC

>D8PAK:00019:00433
TTGTGACCCAGGATACAATAGCCT

>D8PAK:00019:00447
ACTCTTATTGTATTCCGCAGTACA

>D8PAK:00020:00413
ATTCTAATAGTATTCAAGCATACA

>D8PAK:00020:00418
TTGTATTGTGCATCACAAACTCCG

>D8PAK:00021:00425
TGTATCCTGGACTACAGTCTGGGT

>D8PAK:00021:00429
CAAATTGTATTTTAGATCACAATA

>D8PAK:00021:00430
AACCCATGTGTAGTCCATGCCACA

>D8PAK:00021:00448
TTGTAACCCACATTACATTGATTC

>D8PAK:00022:00427
CAATAGAATGTAGTCCGAGTTACA

>D8PAK:00022:00433
TTTTGGATTGTGATCTAAATCACC

>D8PAK:00022:00440
TGTATGCTGGGATACAATTACGCC

>D8PAK:00022:00444
AATCCGAACTGTGGCTTGGCGTAC

>D8PAK:00023:00414
AACACGATGGTGTCGTAGGACACA

>D8PAK:00023:00422
CGAAATTGTATTTCACACCACATA

>D8PAK:00024:00408
AACAAAATTGTACTACAGACTACA

>D8PAK:00025:00404
TTGTACGGTAGGCCACAATTCACT

>D8PAK:00025:00422
TCAATATTGTATTCCATGATACAT

>D8PAK:00025:00426
AAATTAATTGTGAGCTGGATTATG

>D8PAK:00025:00429
AAGTAGATTGTATCGTCAAATACA

>D8PAK:00026:00409
AAAGCCTTTGTATGGTATATCACA

>D8PAK:00026:00419
CACCCGAATTGTAGTCCATCGTAC

>D8PAK:00026:00447
GCATCAAGTGTGATCTCGACTACA

>D8PAK:00027:00410
GCCTAGTTTGTATGTGGCACTACA

>D8PAK:00027:00415
CCTGTCATTGTGCCTCAGCTTACA

>D8PAK:00027:00426
CTTTTATTGTAATCTACACTACAA

>D8PAK:00027:00430
TTGTGATCCGCAATACAATGTACG

>D8PAK:00027:00436
AACTGTGTCCTAGCCTACATTTAT

>D8PAK:00028:00419
TGTAGAAAAGTATTCCCTGCTACA

>D8PAK:00028:00427
ACGCTCGAATTGTGGACTCATACA

>D8PAK:00029:00403
GTTCGATATGTATCGCATGATACA

>D8PAK:00029:00406
ATTTGGACTGTAATCCAGGCGACA

>D8PAK:00030:00409
CCACGCATTGTATCTTACGCTACT

>D8PAK:00030:00414
TGATTGTGATCCAACATACAATCA

>D8PAK:00030:00445
TTGTAGCTTGCCCCACAATCTTGG

>D8PAK:00031:00404
GCATAATATGTGACTTGCGATACA

>D8PAK:00031:00412
TGTGACTCGTCATCCAGCATTCAT

>D8PAK:00031:00421
AAAGTGATTGTATGCTACGCCATG

>D8PAK:00031:00434
CTACCAAGTGTACTCCTGCCCACA

>D8PAK:00031:00438
TTGTAATCAGTAATACAATGCGTA

>D8PAK:00033:00407
TTTGAATTGTGTGCTGTGATACAT

>D8PAK:00033:00409
TTGTATTCTAAAGCACAATGGTGT

>D8PAK:00033:00436
TATAAGAACGTGACCGGTAATACA

>D8PAK:00033:00445
ATATCAACTGTGGTACATGCTACA

>D8PAK:00034:00401
TCTCGAATTGTATCTCTGCCTACA

>D8PAK:00034:00416
ACGCAGATTGTGTCGCCAAGTACA

>D8PAK:00034:00446
GACCTGGTTGTATTTTAGGTCACA

>D8PAK:00036:00423
TTTTCTTTGTAGTCTGGATCACTT

>D8PAK:00036:00424
AACCCGAACTGTAGTCAGGGTCAC

>D8PAK:00036:00444
CCCCAGTTTGTAACCTTCATTACA

>D8PAK:00037:00430
CGTAATATTGTATCGCTGACCACA

>D8PAK:00038:00418
ACCTAAATTGTGACTCTCCCTACA

>D8PAK:00038:00421
GCGCAACTTGTATCGTGCGTCACA

>D8PAK:00038:00429
AATATTTCTGTGGGCTAGACTACA

>D8PAK:00038:00435
ACCTTAACTGTGTCCTGCGACACA

>D8PAK:00039:00430
TTCCTATTTGTAAGCTACAATACT

>D8PAK:00040:00438
CGAATAATTGTGGTCTGAGATACA

>D8PAK:00040:00444
GCATAGATTGTACCGCAGACCACT

>D8PAK:00041:00424
CATTTAATAGTAGTCTGCAATACA

>D8PAK:00041:00444
TCTGAGATTGTCACCCAGATTACA

>D8PAK:00043:00402
ACCCAAACTGTATTCCAGTACACA

>D8PAK:00043:00421
GATTCGAATGTGCCACAGACCACA

>D8PAK:00043:00425
ATGTAACGCACACTACATTCTATT

>D8PAK:00043:00432
ATTACATTTGTATTCCCCGCCACT

>D8PAK:00045:00401
TAACGAATTGTGACCGTGGCTACT

>D8PAK:00046:00415
TTCCGAATTGTGGTGGAGCATACA

>D8PAK:00047:00423
CGGACCATTGTGACCTGTACCACA

>D8PAK:00047:00425
GGGCCTACTGTATTACAGCATACA

>D8PAK:00049:00413
GTTGAAATGTAGTCCAGAGTACTA

>D8PAK:00049:00421
AAAGTATTTGTATCTTAGCATACT

>D8PAK:00049:00435
TTTTGGAATTGTAAGATAGGTTAC

>D8PAK:00004:00497
ATTAAGATTGTGCTCGAGGACACT

>D8PAK:00005:00465
CAAACACTGTGCTCTGGATTACAC

>D8PAK:00005:00491
ATAAGGATTGTGTCTCTCCATACA

>D8PAK:00006:00496
TCCAACACTGTATTCTAGCCCACT

>D8PAK:00007:00482
TGATACAATGTATGCTAGGATACG

>D8PAK:00007:00489
GTGTATTGTAGCTTACAGTTTCGC

>D8PAK:00007:00492
GTCTAAAATGTGGCACGGCCTACA

>D8PAK:00008:00476
TTACCAATTGTAGTCCACGACACA

>D8PAK:00010:00482
AATCTAAATGTGTATTGGAGCACA

>D8PAK:00010:00486
TTGTATGATCGGACACAATTGTCG

>D8PAK:00011:00456
CTGATAATTGTGGTATAGCTTACA

>D8PAK:00011:00464
CATTCCCGGTCATCCAGACTGTTT

>D8PAK:00011:00482
AGCGGAATAGTGTCCTAGATTACT

>D8PAK:00012:00484
GCATAAAATGTATTCTGGCATACG

>D8PAK:00013:00455
TTTGATTCCGTAGTCTGGCATACA

>D8PAK:00014:00459
TGAGGGAAAGTATGCTGGATCACA

>D8PAK:00014:00474
AGCTGCGACTGTGGCCCATGTTAC

>D8PAK:00014:00479
ACTAAATCTGTATTCCTCACCACA

>D8PAK:00014:00485
ATGTGTCCTAGAATACTTTTTCAA

>D8PAK:00015:00459
CATTTCAATGTATGCTGCATCACA

>D8PAK:00015:00485
ACCTCAATTGTGTTCCACAGTACT

>D8PAK:00015:00487
TTCATCATTGTATGCTGTGCTACT

>D8PAK:00015:00497
GTTCCTATTGTAATTTGCACTACA

>D8PAK:00016:00477
ACCAAGATTGTATGCCAGCACACT

>D8PAK:00016:00481
ATTCGCCGTGACCTAGAATACAAT

>D8PAK:00016:00490
TTGTAGTCTGTCTTACAGTCATAG

>D8PAK:00018:00453
CCACGGATCGTATTGTAGGTCACA

>D8PAK:00018:00494
GACAACAATGTAATTTGGAATACT

>D8PAK:00018:00498
CTAAGCACTGTGGCCCAGATTACG

>D8PAK:00019:00468
TATTGTTTGTGCTCCATAATACAA

>D8PAK:00019:00482
ACATAACCTGTAGGCTACGCTACA

>D8PAK:00019:00495
TACTGATTTGTATTCCAGGTCACA

>D8PAK:00020:00465
GGAATGTATCCTATCCTACAATTC

>D8PAK:00021:00471
AGTCCAATTGTGGTTTGGGCCACA

>D8PAK:00021:00472
AATTCAAGTGTGCGCCATATTACA

>D8PAK:00021:00480
TTTTTAATTGTATTCTGTACTTCT

>D8PAK:00021:00488
TCTTTTGTGTCATCCGGCGCGACT

>D8PAK:00022:00464
TGGATGAGTGTATCCTAGAACACA

>D8PAK:00022:00490
TTGTGTCTCAAGTTACAATGTTCC

>D8PAK:00023:00450
TGGGTTTGTATCCTACACTACATT

>D8PAK:00023:00466
ACCATTAATGTATGCTACAATACT

>D8PAK:00023:00498
CGCCAATTGTGCCCTGGCCTACAT

>D8PAK:00024:00460
CTGTATCCCAGCTTACAAACAAGT

>D8PAK:00024:00471
CGGTAGATTGAGTCATAGGGCACA

>D8PAK:00024:00480
GTACTAACTGTATCCTACAGCACG

>D8PAK:00024:00488
TCCGAAAATGTGGTAGCGAATACA

>D8PAK:00025:00465
AGCCAGCATCCAGTGACACATTAT

>D8PAK:00025:00468
ACCAAGTCTGTATCTCCGCCTACA

>D8PAK:00025:00478
ATAAAGTTTGTAATCCCGCATACA

>D8PAK:00026:00476
CCTCTTTATGTATCCTATACTACA

>D8PAK:00026:00497
TTTTGAAAAGTGTCCCATGCTACA

>D8PAK:00027:00461
ATTTAAATTGAATTCTGGCATACA

>D8PAK:00027:00489
TTTGAATCACCATCCTCCTTTCGG

>D8PAK:00027:00494
ACGCCAATTGTGCGATAGGATACA

>D8PAK:00028:00454
GTTCCCTTTGTGACCGAGACTACA

>D8PAK:00028:00457
TGCCAACATGTAGGCTAGCCTACA

>D8PAK:00028:00465
CCCAAAATAGTAGTATAGCATACA

>D8PAK:00030:00471
TTGCCTTTTGTAAGCTAGAGCACA

>D8PAK:00030:00496
CCGTTCTGAGCATCCTGTCTGGCT

>D8PAK:00031:00453
TAATTAATTGTATCACACGTTACA

>D8PAK:00031:00490
AAACTGACTGTATTCTCGAATACA

>D8PAK:00032:00478
CCACCCGAGCATCCATTATGTTGA

>D8PAK:00032:00492
CACCTGTCTGTAATGTGCAATACA

>D8PAK:00032:00494
TCCTTAACTGTATCCCAGATAGCA

>D8PAK:00033:00455
ACGTATTATGTATTGTCGGCCACA

>D8PAK:00033:00471
ATTTAACATCCGATCGGTTCCCTG

>D8PAK:00033:00476
TTCCGCATTGTGTCCTCTAATACA

>D8PAK:00033:00482
AAGGTGCTCACATCCGTTATCCCC

>D8PAK:00034:00456
CACTAGTTTGTATTGTATGATACA

>D8PAK:00034:00467
TGCACACAATCATCCTAATTTTCG

>D8PAK:00034:00470
TTGTATGCTACGTTACTTTCTGTG

>D8PAK:00034:00488
CTTCGGATTGTATTCTCGGCTACC

>D8PAK:00034:00489
ATCCGATTTGTAGTGAGGACCACA

>D8PAK:00035:00473
ATTGACTTGTAGTCTACCATACAA

>D8PAK:00037:00463
TAGAAAATTGTAGTCTAGCTCACA

>D8PAK:00038:00452
ACGAGCATTGTAGGCTGCATCACA

>D8PAK:00038:00454
CGTGAATGTGCCCCAGATTACAGT

>D8PAK:00038:00457
CGTCCTCTGTAACCTAGCATACAG

>D8PAK:00038:00463
CTGTAGCGCCCACTACAAATCGGC

>D8PAK:00038:00465
ATAGTATTTGTAACCTGCAACACA

>D8PAK:00038:00497
TTCTGGATTGTGTCTCGCATCACA

>D8PAK:00039:00474
GTTCGAAATGTATTATCGACCACA

>D8PAK:00039:00485
TGATAGTATTGTACGCCAGCGTAC

>D8PAK:00040:00466
ACCAGCTTGTAGTCACGTACAATT

>D8PAK:00040:00473
TCACAAAATGTATTCTATGATACG

>D8PAK:00040:00483
ACCTACATCCGGATTGGCCTCTCG

>D8PAK:00040:00499
ATTACTAATGTATTGCATCATACA

>D8PAK:00041:00451
CCTATTTTTGTATGCCCCGATACA

>D8PAK:00041:00462
CAAATTGTATCTTCAGTTACAAAG

>D8PAK:00041:00467
TTGTATTCCCCAATACACTCGCAG

>D8PAK:00041:00477
TGCCCAAATGTATTCGACAATACA

>D8PAK:00043:00468
TCTGTAATTGTGGCCCTGGGCACT

>D8PAK:00043:00491
ATGTGGTCCGCGATACATTCATTC

>D8PAK:00043:00497
TCTCAGATTGTACGCTGAGTTACT

>D8PAK:00044:00490
ACCCCAATTGTGTGCCCTATTACA

>D8PAK:00045:00499
ATGTAAATTGTAGTTTAGCTCACT

>D8PAK:00046:00468
TGCTAACTGTACGCCAGACTACTA

>D8PAK:00046:00492
GTTCTAAGTGTAGTCCAACCTACA

>D8PAK:00047:00484
TTGTAGTCTGCGACACAATAAAAT

>D8PAK:00049:00468
TTCTGAAATGTATCCCCGACGACA

>D8PAK:00049:00483
TCTAAGACAGTACTCCAGGTTACA

>D8PAK:00004:00519
CTTCCAATTGTGACCCAGGTTCCA

>D8PAK:00004:00537
CGTGGAATCGTAGTCTACAATACA

>D8PAK:00006:00517
CTTTGTAATGTGACTTGTAATACA

>D8PAK:00006:00526
CATTGAGAATGTAGCGGGAACTAC

>D8PAK:00006:00548
TGGATTAATGTATGCTACGTTACA

>D8PAK:00007:00501
ATCCACCCGGCATCCGTTTTTCCT

>D8PAK:00009:00540
GTGCAAAATGTGGGCCTGGTCACA

>D8PAK:00010:00533
ATCCATCATCCTCGCCTGAACGCT

>D8PAK:00011:00533
TTGTATCGCCCAATACAGTTTAGT

>D8PAK:00012:00511
GCCAACATTGTAGCCCATACCACT

>D8PAK:00012:00522
CTGAAATTGTAACCTAGAGCACGA

>D8PAK:00013:00513
TTCAAATTGTATCCCATAACACAC

>D8PAK:00014:00500
GTCGGAATTGTAGTCCACGATGCA

>D8PAK:00014:00521
TTGTAGCCTGGACTACTCTTAATT

>D8PAK:00015:00526
TCTGCCACCGTAGTCTGTGATACA

>D8PAK:00015:00531
ATCAACCTGTCATCCACGTCACAT

>D8PAK:00015:00540
CAAAGGGCTGCATCCTGGGCACTA

>D8PAK:00016:00538
AACCTGCATCCCCACTTGCAGCTT

>D8PAK:00017:00502
AGCTAAATGTATTACAGACTACTA

>D8PAK:00017:00512
AAAATTGTATACCATCCTACTATT

>D8PAK:00017:00527
CATCAAATTGTGATACGGCATACA

>D8PAK:00017:00531
AATCAGATTGTGTGTAAAGACACA

>D8PAK:00018:00513
ATCCAAAGTGTAATACAGCGTACT

>D8PAK:00018:00548
TTGTAGCCTGTACCACTTTCTGCT

>D8PAK:00019:00508
TGGTAATATGTATGCTATGTTACA

>D8PAK:00019:00532
TTGTACTCTACCGTACATTTTTGC

>D8PAK:00020:00501
ATTTGATTGTATCCCAAGTTACCA

>D8PAK:00020:00503
CTGTAGCCAGGCTTACAATCATGT

>D8PAK:00021:00527
TACGATTGTAGCCTGAACCACACT

>D8PAK:00021:00531
ATGAACTTTGTGCCTTGTATTACT

>D8PAK:00022:00525
ACTTAAATTGTGTGCTAGGATACT

>D8PAK:00023:00507
TGTATCCTGCGCTACAATTCCGCG

>D8PAK:00024:00501
ATTGGTCCTGTATGCTCCGATACA

>D8PAK:00024:00504
ATAGAATTGTATTCTGTCGCACAT

>D8PAK:00024:00535
TTGAGAAATGTCTGCCCGAATACA

>D8PAK:00025:00530
CTATGTAACGTATTCTAGGTTACA

>D8PAK:00026:00500
TAGCTCATTGTATTACTCGTTACA

>D8PAK:00026:00539
TCCGATTTTGTATCCCAGCTTACT

>D8PAK:00027:00509
TGACTCTTTGTGGCCCGCGATACA

>D8PAK:00027:00520
CGGGAGACTGTAGCCCAGGCCACA

>D8PAK:00027:00523
TTGTAGCCCAAATCACATAGTTAG

>D8PAK:00027:00535
CTGTATTCTGCAATACATTTGACG

>D8PAK:00027:00543
CTATAATTTGTAACCTAGGTCACT

>D8PAK:00028:00505
TTGTAGCCTTCGATACAATTCGCC

>D8PAK:00028:00514
TCCCGAATTGTATCATGAGATACA

>D8PAK:00028:00519
AAGGCGACTGTGTTCCATCACACA

>D8PAK:00028:00548
AAATCAATAGTATTGGGAAATACA

>D8PAK:00029:00527
TTGCTTGTCCCATCCAGGCCTTTC

>D8PAK:00029:00534
TTCACAACTGTATTGTAGATTACG

>D8PAK:00029:00545
AGTATAATTGTAGCTTAGGACACT

>D8PAK:00030:00533
TATTCGAATGTATTCCACCCTACA

>D8PAK:00030:00540
CTGTATCCTAGGCCACAAGTTGTT

>D8PAK:00031:00516
TACCAACATGTATCCTGTGACACA

>D8PAK:00031:00538
AAACCGTTTGTATCACAGCACACA

>D8PAK:00032:00549
GATGCCAATGTATGCCAGCTCACA

>D8PAK:00033:00538
TAAATGTGACACACAATACAATTT

>D8PAK:00033:00549
TCACCGAATGTGTGCTGTATTACA

>D8PAK:00034:00521
ATCGAGATTGTAAGACGTCATACA

>D8PAK:00034:00542
GCCCAAATTGTATTCCTGGTTGCA

>D8PAK:00037:00502
AATGCAATTGTATTCTGAAATACA

>D8PAK:00037:00507
AAAAATTATGTATTCCAGATTACC

>D8PAK:00037:00527
ATTGACATTGTGCCCGGGAATACT

>D8PAK:00038:00511
CTGCAGTTTGTATGCTGCACTACA

>D8PAK:00038:00518
TAAGTGATTGTAGGACACACTACA

>D8PAK:00038:00519
AGAAGTTTTGTGTGCTGAGTCACA

>D8PAK:00038:00528
GTCCAAAGAGTATGCCATACTACA

>D8PAK:00038:00530
TGGCGGTTTGTAGCCGCGGATACG

>D8PAK:00038:00544
CATGTCTTTGTAAGCTCGAATACA

>D8PAK:00039:00503
GTGACGACTGTGTCCTAAGACACT

>D8PAK:00039:00520
CATCAAACTGTAGCTGGTATTACA

>D8PAK:00039:00527
AACCAGTTTGTAGCCTACGGCACC

>D8PAK:00040:00519
ATGTAGCCTTGACTACAATCAGCT

>D8PAK:00040:00527
CAAAGGATTGTGACACACATTACA

>D8PAK:00041:00524
ATGAAGATTGTCACTAGGCATACA

>D8PAK:00042:00516
ACTGCTATCCCATCCTATTGCTAA

>D8PAK:00042:00535
CTTAATTGTATTCCAGGTTATATT

>D8PAK:00042:00537
TAATATGTGCTTTAGCATACACTT

>D8PAK:00043:00509
TGCCGGAGTGTGCTCTGCGTCACT

>D8PAK:00043:00511
TTGTAACCTGTACCACAGTCCTAA

>D8PAK:00043:00514
TTGTGACCCATGATACAGTTTCGC

>D8PAK:00043:00520
TAGGCAAAAGTAACCCATAATACA

>D8PAK:00044:00510
AGTCAATCTGTAGCCTATATTACA

>D8PAK:00044:00544
TAGGCTTTTGTATTGCAGAACACA

>D8PAK:00046:00530
CTTCCAATTGTATTCTACCGCACA

>D8PAK:00047:00527
ACCTTGATAGTACCCTAGACTACA

>D8PAK:00047:00539
TGGCAGTTTGTATGCTGTATTACA

>D8PAK:00048:00502
CTCCTCTCTGTAATCACGGATACA

>D8PAK:00048:00522
ATCCCGATTGTGGTCTGGCTTACA

>D8PAK:00049:00519
ACTTAACATGTAGTACAGCGCACA

>D8PAK:00049:00533
TTGTACTCTAGAATACCATTCTCA

>D8PAK:00049:00543
CAGTGTTTTGTATGCTCTGATACA

>D8PAK:00049:00547
ACTTTAACTGTGTCCAGGCCTACA

>D8PAK:00005:00557
ATTAGTTTCGTAATCCACGCTACA

>D8PAK:00005:00561
TTAATTGTAGTCCAGCTCACTAAT

>D8PAK:00006:00584
GTGAACATTGTAGTACAGGGTACT

>D8PAK:00007:00596
ATCAATTTGTAGCCTACACTACAT

>D8PAK:00007:00599
AACTTGCATCCCAGACTCCATTAA

>D8PAK:00008:00553
TCCTCGATTGTGTCCGACGGCACA

>D8PAK:00008:00557
TTGCCAAATGTAACGTGGCTCACA

>D8PAK:00008:00571
GCTGGCCCTCATCCTGCCGTATTC

>D8PAK:00008:00572
ATGTTTTGCCATCCTTTTTATCTT

>D8PAK:00009:00559
ACATATTCTGTAGCATGCAACACA

>D8PAK:00009:00571
TCTTAATTGTGGTCCAAAGTACAT

>D8PAK:00009:00586
ATCAGGATTGTGTACTAAGGCACA

>D8PAK:00010:00559
ACGTATATCGTAGTCTAGCTTACA

>D8PAK:00011:00572
CGGCGTACGCATCCGGGTTTTTCT

>D8PAK:00012:00550
TCTTTCAATGTGGCCTGGAACACA

>D8PAK:00012:00575
AACCAGTTTGTAATTACGGATACA

>D8PAK:00012:00582
TTGGTAATTGTATCGGAAGCCACA

>D8PAK:00012:00597
GTCCTATTTGTAGTCCGCGTTACT

>D8PAK:00013:00557
TATCTAATTGTAATGGAGGTCACA

>D8PAK:00013:00560
TATAAAATCGTAACCTGGCCCACA

>D8PAK:00013:00572
AAAAAGATCGTAGTTCTGGATACA

>D8PAK:00013:00589
TCGATTGTATTACCCGATACATTT

>D8PAK:00014:00572
CTAAAATTTGTAGCCCTACCTACA

>D8PAK:00015:00558
TTTGGAATAGTAGTCTCGGGTACA

>D8PAK:00015:00570
TTGTATCGTGGCGTACAAATGTGC

>D8PAK:00015:00588
CTCGAGACTGTACTCTAAACTACT

>D8PAK:00016:00565
TTTGACTTTGTAACCGACGTTACA

>D8PAK:00017:00557
TTTACAATTGTAGGCCCGGACACT

>D8PAK:00017:00558
TCGCCAATTGTAGTCCGTATTACT

>D8PAK:00017:00566
TACAAGATTGTGTCTTATGTCACT

>D8PAK:00017:00567
TTGTAAGCCAGCCCACAATTTGTA

>D8PAK:00017:00579
GTAATAGTATTCTACGATACAGTC

>D8PAK:00017:00591
CTAAAAATTGTATCGCCACATACG

>D8PAK:00017:00597
TATGGATTTGTAGCTCCGGTCACA

>D8PAK:00018:00574
ATGTAATTGTGTCCCAGCATACAA

>D8PAK:00019:00565
TCAGAGATTGTGACCAAGGATACT

>D8PAK:00019:00589
TTGTATGGTACCGTACAATTCCCT

>D8PAK:00020:00563
TCGTCGAATGTAGCCTAACACACA

>D8PAK:00020:00587
TCAATCACTGTGTGCTGCGCTACA

>D8PAK:00020:00599
TTAGGAATTGTGAGCTAGCTTACT

>D8PAK:00021:00579
GTTTGAGTGGTCTGGAATACAATT

>D8PAK:00022:00562
TTTGGATTGTATTGTGGCCCACAT

>D8PAK:00023:00568
GTGTGAACTGTGGGCCCCAACACA

>D8PAK:00023:00572
TGCCAAAGTGTGACCTGGATTACT

>D8PAK:00023:00583
TTGTATTCTATGGCACAATTGGCT

>D8PAK:00023:00597
CTGTAGCCCCCAATACAATGTGAG

>D8PAK:00025:00575
AACATAAAAGTAGTATAGCATACC

>D8PAK:00025:00582
TCCCAAAGGTCATCCATCCTTTCA

>D8PAK:00025:00588
AATTTTTTTGTCACTCAGAACACA

>D8PAK:00026:00558
ATTGAAATTGTATGCTGTGACCCA

>D8PAK:00026:00575
GACCCAAACGTAATATGGATTACA

>D8PAK:00026:00578
GTAACAATTGTAACTGTGCACACA

>D8PAK:00028:00581
TTGCAATTGTAATTTAGCTCACAT

>D8PAK:00029:00582
TTGTATCCTCGGATACATAGATCT

>D8PAK:00029:00587
GTTGCCTGGCCATCCTGCGAAAGC

>D8PAK:00030:00576
TTTTTAATTGTGGCCCTCAACACA

>D8PAK:00030:00578
CTCACGACTGTAGGCAAGAGTACA

>D8PAK:00030:00588
ACAAAAATAGTATTCTAAGATACA

>D8PAK:00030:00592
GGATCTAGTGTATCCTAGAATACA

>D8PAK:00031:00561
CCACCGATTGTATTCCAAGTTACG

>D8PAK:00031:00563
TACTCTTTAGTATCCCTGGATACA

>D8PAK:00031:00571
TCTAAGATTGGAGTGTGGATTACA

>D8PAK:00031:00581
AAGTTGCTTCCATCCGGTCTTCAT

>D8PAK:00032:00564
TCTCGAAATGTAGTGCAAGTCACA

>D8PAK:00032:00566
ATCCGATTGTAACCCAAAATACAA

>D8PAK:00032:00576
TTTTCGACTGTGACCCCGACTACA

>D8PAK:00032:00577
CCTTGATTTGAGCGCTAGCATACA

>D8PAK:00033:00563
TGGTAACTGTATCCCCTAATACAT

>D8PAK:00033:00589
AAAGCAAAAGTAAGCCCTAATACA

>D8PAK:00033:00591
CACCAGAATGTGCTGTGGCTTACA

>D8PAK:00033:00593
CTTTTGCATCCGCTTTAGTCTCTC

>D8PAK:00034:00552
GCTAACTTTGTACGCCAGAGTACA

>D8PAK:00034:00564
TTGTAATCTGGTACACAATTGGAC

>D8PAK:00035:00562
TTCTACATTGTAACCCAGGTCACA

>D8PAK:00035:00589
ACCCTTTTGTATGCCAGGCTACAT

>D8PAK:00035:00590
TGAAAAATAGTACTACAGGGCACA

>D8PAK:00036:00555
AATATATTTGTAAGGTACGCTACA

>D8PAK:00036:00557
GTACCAATTGTGCCCTGGCATTCA

>D8PAK:00036:00558
GTCCTACTTGTATCCCTCGTCACA

>D8PAK:00036:00588
ATGACGAACGTATGATAGAACACA

>D8PAK:00036:00593
GATCCAATTGTGGTCTCTCTTACA

>D8PAK:00037:00559
GTTGGGAATGTATCGGGACGTACA

>D8PAK:00038:00552
TGACCAATTGTGTCCGGACATACA

>D8PAK:00038:00568
GCTCTCTTTGTGTTCTATGTCACA

>D8PAK:00039:00553
GATATTTTTGTAGTGTACGTTACA

>D8PAK:00039:00590
TCATCAAATGTGGGTTAAGACACA

>D8PAK:00040:00553
TCACGAATTGTGGCGCTGGTCACA

>D8PAK:00040:00583
TTTGCAATCGTATTATAGACCACA

>D8PAK:00041:00579
AATGAGATCGTAGCCTAGTATACC

>D8PAK:00043:00568
TCAGCGTAATGTAACCCTACTACA

>D8PAK:00043:00589
AACACATTTGTAGTATAGATTACT

>D8PAK:00043:00598
GGCAAGATTGTGCCTTAGGCCACA

>D8PAK:00043:00599
CTCAAATAAGTATCCTACGTCACA

>D8PAK:00044:00561
AACCACTCCGTGGCGTGGAATACA

>D8PAK:00045:00560
AACAGTTTTGTATCCTTGACTACA

>D8PAK:00045:00565
CCGAACATTGTATTCAGCATTACA

>D8PAK:00045:00573
TAGCAGTTTGTAACACCGATTACA

>D8PAK:00045:00588
ATGGAGACTGTGTGCCGGATCACA

>D8PAK:00045:00592
TGTGTTCCAGACTACAATCTGCTC

>D8PAK:00046:00567
CTGTATTACACGCTACAAGATACC

>D8PAK:00046:00569
TAACTATTTGTATGGTGGTATACA

>D8PAK:00046:00581
ATCAAAATGTAACACCGACTACAT

>D8PAK:00046:00592
ACATCAATTGTCATGTGGACTACA

>D8PAK:00047:00595
AATTACTTTGTATGCCTCAATACT

>D8PAK:00048:00551
AAAGAACTTGTAGCCTGCGACACG

>D8PAK:00049:00550
TTGTATGCCACACTACAATTTCAA

>D8PAK:00049:00582
TACCCAGAATGTATGCCTAGACAC

>D8PAK:00049:00586
GTTAGATTGTATTGTATGATACAC

>D8PAK:00049:00596
TCCCATATCGTATTCTGCACTACA

>D8PAK:00049:00597
CAAATGATTGTGGTAGGGCATACA

>D8PAK:00007:00607
CATCGACTCTGTAATGTGGAATAC

>D8PAK:00007:00629
TCCGATTTTGTATCCCAGCTTACT

>D8PAK:00009:00601
ATACAATCTGTATTCTGGCATACA

>D8PAK:00009:00628
TTTTTTCGTAATCTATAATACACA

>D8PAK:00010:00623
TTTCCGACCGTATTCTAGAATACA

>D8PAK:00012:00604
TAACTAATTGTATGCTCTGCCACT

>D8PAK:00012:00646
CGCGGTTCTACTTGCTGAGTCCGA

>D8PAK:00013:00613
TAGCCGATACCATCCTGCTCTAAC

>D8PAK:00013:00622
TTGTAGTACGCGATACAATTCAAT

>D8PAK:00013:00629
CATAAATTTGTGGCGCATGATACG

>D8PAK:00013:00631
ACCTTGATTGTACGCCTTAATACA

>D8PAK:00014:00633
GTCTACTTTGTAACGTAGGATACA

>D8PAK:00014:00638
AATCCGACTGTATTCCATGCTACA

>D8PAK:00015:00605
TTCCCAATTGTATCACGTACTACT

>D8PAK:00015:00620
CATTTTGTATCATAGCGTACAATG

>D8PAK:00016:00602
TACCCAAATGTGATCTGGGATACA

>D8PAK:00016:00613
CGGGTCTTTGTATCTCATCCTACA

>D8PAK:00016:00639
TTTAAGATTGTACTCTACAGTACG

>D8PAK:00017:00612
AATCCGACTGTATTCCATGCTACG

>D8PAK:00017:00630
TTACCGATAGTATCTCAGAACACA

>D8PAK:00017:00642
TGGCATAGTGTATGCTTGCATACA

>D8PAK:00018:00619
CACTCAAATTGTATTTCTGATCAC

>D8PAK:00018:00645
GCCATCTCTGTATTCTGCAGCACA

>D8PAK:00020:00608
ATGTACGCTGGCTTACAATCTTTC

>D8PAK:00020:00639
TTGTAGTCTGGGATACTTTGCGCG

>D8PAK:00020:00642
AGTGCGAATGTATCAGGGCTTACA

>D8PAK:00021:00636
GTAGTGCCTTCATCCTGGCAATTA

>D8PAK:00021:00638
TTCAAAAAGTGGCCCAGACTACAA

>D8PAK:00022:00606
AATCCTATTGTAACGCTGAATACA

>D8PAK:00022:00632
TAGTATTGCAGGCTACAAATTAGA

>D8PAK:00022:00645
TTGTATGTTGTACTACATTTACTT

>D8PAK:00023:00601
TTTTGGAATGTGCTCTAGCATACC

>D8PAK:00023:00637
AAATATTCTGTGGTCCGTGATACA

>D8PAK:00023:00643
ATATATCACTCATCCCAGGCCTGC

>D8PAK:00024:00626
GATGTAACCGTATGCCAGCATACA

>D8PAK:00024:00632
CCCACGATTGTAACAAGGATCACA

>D8PAK:00026:00602
ATCTCCATTGTATGCCACTATACA

>D8PAK:00026:00611
CCAAACATTGTATCGAGCAATACA

>D8PAK:00026:00614
ACCTGAATTGTGTTGTGGAGCACA

>D8PAK:00026:00615
TATTTTTTTGTAACCCACCTCACA

>D8PAK:00026:00644
TCGTACTTTGTGTCCGTGAATACA

>D8PAK:00027:00616
TCATTAATTGTAATCTACCGTACA

>D8PAK:00027:00642
CAAGCTATTGTAGCTTGGCATACA

>D8PAK:00028:00601
CTTTTGCTGACATCCGTCACTTCT

>D8PAK:00028:00638
CTGCTGAGAGTATTCTAGAATACA

>D8PAK:00028:00639
GTCTAAATTGTGCCTTAACCTACA

>D8PAK:00029:00604
AATCAATTTGTAGTGTAGGATACA

>D8PAK:00029:00610
TTTTGAAATTGTGAACTGGCCCAC

>D8PAK:00030:00601
CGAGCGACAGTATTACGGACTACA

>D8PAK:00030:00604
TTGTACCCTGCACTACAATTGGCT

>D8PAK:00030:00606
AAGACGATTGTGACCCATGGCACA

>D8PAK:00031:00601
GGCAGAAAAGTGATCCACGATACT

>D8PAK:00031:00647
GTAAAAAGTGTGTCCCCTAATACA

>D8PAK:00032:00603
TTGTAGCGTGAGTTACAATCGTAC

>D8PAK:00032:00635
ATTACCATTGTATCACAGGACACT

>D8PAK:00033:00641
TTGCGATTTGTAAGCTATCCTACA

>D8PAK:00034:00607
CAATAAATGTGATCTACGATACAC

>D8PAK:00034:00636
TTTTCAATTGTGTCCCCAGTTACA

>D8PAK:00034:00646
ATTGTAATTCATCCTACAATCTGT

>D8PAK:00035:00606
CTGTCGATCGTATTCCCTAATACA

>D8PAK:00035:00635
GCTCAATCTGTACTCTACAATACA

>D8PAK:00036:00602
ATCTAAATTGTAGTGTAGGCCACT

>D8PAK:00036:00611
ATTACCAATGTATCACCTGCTACA

>D8PAK:00036:00629
GCAATAATTGTAGTATAGCATGCC

>D8PAK:00037:00608
GGCCCCATTGTATGATAGCCTACA

>D8PAK:00037:00641
AACAGACTGTATGATAGGCTACAT

>D8PAK:00038:00637
CACAAGTTTGTAAGCTAGATTACG

>D8PAK:00038:00638
CCAGTAGCGTCATCCGTCAAATCG

>D8PAK:00039:00601
TCCCTGATCGTATCTTGTACTACA

>D8PAK:00039:00634
GAGAATTGTAACCCAACATACAGG

>D8PAK:00039:00635
ATTAAGCATCCTCGTTCTTTAGCA

>D8PAK:00039:00639
TCAGCGATTGTGCCCCATCCTACA

>D8PAK:00040:00603
TTGTAACATAGGCCACAATGTGCC

>D8PAK:00040:00626
AAGCAAAATGTAGTGCACGTTACA

>D8PAK:00040:00641
TAGTATGCTAAGATACAATCTCGG

>D8PAK:00041:00627
AACAGAATGTATTAAGGAATACAT

>D8PAK:00042:00613
CGTCTATCTGTAAGCCCGGTTACA

>D8PAK:00042:00626
TACCAAAAAGTAATGGGGAATACA

>D8PAK:00042:00648
TTGTATCCTGGGCTACTTTTATTG

>D8PAK:00043:00608
GTGTATTGCAGCCCACAGTCTCTG

>D8PAK:00043:00615
ATCAGGAATGTATCCTAGAGCACA

>D8PAK:00043:00620
TATGCATTTGGATGCCACGCTACA

>D8PAK:00043:00640
TTGTGTCTTAGCATACTATTAATG

>D8PAK:00043:00644
GAGTACAGTGTATGCCATGCTACT

>D8PAK:00043:00648
ACCCAGATCGTAGTGCTGCATACA

>D8PAK:00044:00601
AGGTAGATAGTAATGTGGGCTACA

>D8PAK:00044:00609
GTGATAATTGTGACGCAAGCCACA

>D8PAK:00044:00626
TTGTGTGCCACCCCACAGTCTTAA

>D8PAK:00046:00629
TTGTGACTTAACCTACAATTGTTA

>D8PAK:00047:00603
GCTGACTCCGTAGCCTGGAGTACA

>D8PAK:00047:00625
TCTAAAAATGTGGCGCCTGTTACA

>D8PAK:00047:00630
TTGTATTCTGCGCCACACTCTTCG

>D8PAK:00047:00632
TTGTAGCCCCGGTTACATATTCGT

>D8PAK:00047:00641
TTGTATTCTGCGCTACGATTACAG

>D8PAK:00047:00642
AATTAAATTGTAGCTCAAGTCACC

>D8PAK:00047:00646
TTGTAGTCGGCCCCACAATTCCCT

>D8PAK:00048:00632
GATTTGTATTCCACGATACAATCA

>D8PAK:00020:00669
TGCAGCATTGTAACCTGAGATACA

>D8PAK:00021:00656
ATATACTATGTGTCCTGAGCCACA

>D8PAK:00021:00672
TTTTTAGTTGTATCCCATAATACA

>D8PAK:00023:00650
CCCTGTATTGTATCCTGCGATACA

>D8PAK:00023:00651
TTGTAGTTCACAATACAATCCTTC

>D8PAK:00025:00657
TGGAAGAATGTGGTCCTGCCCACA

>D8PAK:00026:00656
AACTGATTTGTATTATACACCACA

>D8PAK:00027:00660
TAGGTAAATGTAATCTGGGCCACT

>D8PAK:00028:00656
TTGTATTGCTGAATACAATCACCT

>D8PAK:00029:00677
CCATACACTGTATCTTACGCTACA

>D8PAK:00030:00664
TACGCAATCTTAGTCTAGCATACA

>D8PAK:00030:00685
TATTAATATGTATCCCGGGCCACA

>D8PAK:00031:00651
TATAGAAACGTGGCTCAAGCCACA

>D8PAK:00031:00657
AAAAACTTTGTGTGCGTCGCTACA

>D8PAK:00031:00671
CTATAGATTGTATTATAAACTACT

>D8PAK:00031:00682
ATCATGACTGTACCCTAGAGTACT

>D8PAK:00031:00687
CACAGGAAAGTATTCGACGATACA

>D8PAK:00032:00667
ATCATCTTTGTATCCTGGAGTACA

>D8PAK:00032:00697
TCTCGGAATGTGCTACAGCTTACA

>D8PAK:00032:00698
CTTTGTCGCCCATCCTACAATACT

>D8PAK:00033:00668
CTATGTGTTCTGAATTACAATTGT

>D8PAK:00034:00679
GCTAGATTGTGGCCTAAAATACAA

>D8PAK:00034:00691
ATCACGAATGTGCTCCAACTCACT

>D8PAK:00034:00695
GCCTGAACTGTGTCCTGGGATACA

>D8PAK:00036:00684
AATCGTTTGTATCCTACAACACAA

>D8PAK:00036:00686
AATAACACTGTGGCGTGGCCTACA

>D8PAK:00037:00684
CCGGATTTTGTAGGCCAGACTACG

>D8PAK:00038:00655
TCTCCCTATGTGTCCTGCGCTACA

>D8PAK:00038:00687
AACAACTCATCCAGGGACCATAGA

>D8PAK:00038:00688
AATTTTAATGTGTCCCACGCTACA

>D8PAK:00038:00697
TCACACTATGTATCATGCGCTACA

>D8PAK:00039:00662
TTTGATTCAGTAGCCTCCGTCACA

>D8PAK:00039:00669
AAACCGATTGTGACTCGTACTACT

>D8PAK:00039:00690
TCCTAGATCGTGTTCTAGAGCACT

>D8PAK:00040:00681
CAGCTGATTGTGTCCTGCATCACA

>D8PAK:00040:00693
AGAGCTGGTCATCCTACCAATCAT

>D8PAK:00041:00651
GCAAAAATTGTATGCTGCGTTACT

>D8PAK:00042:00657
AGATAAATTGTATCCAGCCCTACC

>D8PAK:00042:00678
TATTAGAATGTAGCCTCTCCTACA

>D8PAK:00042:00688
AACTGAATGGTGTCTCAGCCCACA

>D8PAK:00043:00662
AATATGAATGTAGCGTGCACTACA

>D8PAK:00043:00697
TTACAGTTTGTGACATAAGACACA

>D8PAK:00043:00699
ACGTACTATTGATGCGACCATACA

>D8PAK:00044:00683
ATAATAAGTGTAGCTCGGGATACA

>D8PAK:00045:00673
TCTTGTATTGTAGGCTGGACTACA

>D8PAK:00045:00678
TCTTTTCTTCCATCCAGGTTCTGT

>D8PAK:00045:00688
CAAAGAACTGTGGCCTGGCTTACA

>D8PAK:00045:00698
GTTCACTTTGTACTCTGTATTACA

>D8PAK:00046:00663
TTTAAGTGTGAGCTGCACTACCAT

>D8PAK:00046:00674
AATCGTTTAGTATCCTGGGATACA

>D8PAK:00046:00680
AGCTCGATTGTGTGCCGTATTACA

>D8PAK:00046:00688
GTTTGTAATGTATGCCGGATCACA

>D8PAK:00046:00697
TTGTGCTTCGGCCCACAATTGATT

>D8PAK:00047:00693
CGATACACTGTGCTTCAGCCTACA

>D8PAK:00048:00699
CCCATCTTTGTATCCTAGCATCCA

>D8PAK:00049:00657
TCTTTCATTGTATTGTAAGTTACA

>D8PAK:00049:00676
TAACCATTTGTAAGCCACACTACA

>D8PAK:00049:00682
TTTACTTTTGTAATCTGTAGTACA

>D8PAK:00015:00712
GATGTACATCCGGGATTAGGCGAT

>D8PAK:00018:00738
CGGGAATCCGTAGTCTGCACTACA

>D8PAK:00020:00731
TTAATTGTGTGCTCCGCCACATAT

>D8PAK:00020:00734
CCAATTGTATTACATCATACAAAA

>D8PAK:00021:00719
TTGTACTCTACAATACATATTAAC

>D8PAK:00021:00731
TTGTATTCCCGCTTACACTCACCA

>D8PAK:00022:00729
TACCTAAATGTATGCCATATTACT

>D8PAK:00023:00701
AACCAGATTGTATCGCAGGCTACT

>D8PAK:00023:00706
CATCGATTGTATTTGACGCTACAT

>D8PAK:00024:00717
TACCAGACTGTATCACAGAATACG

>D8PAK:00024:00735
TTGTAGTCTGGGGCACGATCGCTA

>D8PAK:00026:00709
TCAGCGATTGTAGTCTAGCGTATG

>D8PAK:00026:00719
GTAAGATTGTAATCATACACTACT

>D8PAK:00027:00708
CTTTTTGTAGTCCAACATACAGTG

>D8PAK:00027:00711
TTGTAGTCTGGGGCACGATCGCTA

>D8PAK:00027:00722
TTCCGATTTGTGGGCAGGCCTACA

>D8PAK:00027:00729
GATGTGTTTGTATGCTGTATTACG

>D8PAK:00027:00746
TCGTGATTGTGCTCCAAGTCACAA

>D8PAK:00028:00703
TAAATCTTGTATTCCAGCATACAT

>D8PAK:00028:00705
ATTTGAATTGTAACCTAATGCCAT

>D8PAK:00028:00706
ACTGGAATGTATCTTGGACTACAT

>D8PAK:00028:00708
TTATAACTTGTGACGCCGACTACA

>D8PAK:00028:00724
ATTGTGACTGTAGCCCCTATTACA

>D8PAK:00029:00720
TAGAAGAAAGTGTCTCAGCGTACA

>D8PAK:00029:00727
TTGTATCGCACGTCACAATCTATG

>D8PAK:00029:00737
AAAAACATTGTAGGCCAGGACTCA

>D8PAK:00030:00703
ATGATTACTGTGTCGAGGAATACA

>D8PAK:00030:00718
TAAGGCAATGTATGCTAAACTACA

>D8PAK:00030:00729
AAGAAATTTGTATGCTCCCACACA

>D8PAK:00030:00731
GGTTTGACTGTGTTCCTCGATACA

>D8PAK:00030:00749
TTGTATGCTAGCATACAACCATGG

>D8PAK:00031:00710
ATGTAGCCCCGGTCACAATCTAGT

>D8PAK:00031:00734
TTATTTTTTGTAGCCATCATCACA

>D8PAK:00032:00746
GAAGTGATTGTAACCTAAGCTACT

>D8PAK:00033:00704
TTTCCAATTGTGGGATAGCATACG

>D8PAK:00033:00709
ATTCGGCCCCATCCAGTTATCATA

>D8PAK:00034:00713
GTGCGAAGTGTGTCCCTGATTACA

>D8PAK:00035:00709
TCATATTTTGTACGCTGGAACACT

>D8PAK:00035:00719
TAACAGACAGTGAGCTGTATTACA

>D8PAK:00035:00726
TTAGCCAATGTATTGCAGACTACA

>D8PAK:00035:00744
TCCGCCTTTGTATTCTGCCATACA

>D8PAK:00036:00719
ACGAGGATTGTACTGCATAGTACA

>D8PAK:00036:00745
TCATAAATTGTGCTCTCGATTACT

>D8PAK:00037:00700
CTATGTATCCAGGGTTACATTTAA

>D8PAK:00037:00701
TTGCGGTTAGTGTCCGGGGTTACA

>D8PAK:00037:00710
ACAGACTTTGTGAGATAGAATACT

>D8PAK:00037:00717
CCGGATTTGTACTCCACAATACAA

>D8PAK:00038:00704
CTTGCGTCAACATCCGGTTATTCG

>D8PAK:00038:00711
GGACCAATTGTATTGCAGAATACC

>D8PAK:00038:00714
GGCGAATCGTGACCTGCAATACAT

>D8PAK:00038:00737
TCCTTGATTGTATGCCGTGACACA

>D8PAK:00039:00704
CTAGATATTGTAACCCCACGTACA

>D8PAK:00040:00718
GTGAACTTTGTATGCCAGTATACA

>D8PAK:00040:00743
TCCGAAATTGTACGATCGCCTACA

>D8PAK:00040:00746
CTGTATCCTGGCTTACAATGTAAC

>D8PAK:00040:00749
TGATTGTATTCTAACCTACAAACT

>D8PAK:00042:00710
CTAGCGAATGTAGCCTGCCCTACA

>D8PAK:00043:00709
GATATAATTGTGCCCTAGAGTACA

>D8PAK:00043:00710
GTCGCGATCTGTATGCTAAGATAC

>D8PAK:00043:00712
TATTCGATTGTGGCCCAGACCACG

>D8PAK:00044:00707
ATTTAGATTGTATTTACCGGCACA

>D8PAK:00044:00745
ACCGGATTGTGATCTCCGCCGCAC

>D8PAK:00045:00713
CTTAAGTCTGTAGCATGCGCTACA

>D8PAK:00045:00722
GCTGGGATTGTATTAAGGACTACG

>D8PAK:00045:00743
TCGTCAATTGCATGCTGCGTCACT

>D8PAK:00046:00735
AGGGAACTGTATTCCAAATTACAT

>D8PAK:00046:00737
ATTTGCGTATGCTAGAATACAGTT

>D8PAK:00047:00725
TCGTAACTGTATGCTAGCATACTA

>D8PAK:00047:00733
ACACAAAATGTGTTCTGTGATACT

>D8PAK:00048:00702
TTACAGTTTGTGACATAAGACACA

>D8PAK:00048:00720
CGATAGATAGTGGTGCACGTCACA

>D8PAK:00048:00728
GTTTCAATTGTATGCCTCGCCACA

>D8PAK:00048:00742
CGGCATTATGTATCCAGCACTACA

>D8PAK:00048:00746
ATTCCAATTGTACGCCCAAATACT

>D8PAK:00049:00707
ACCCCATTTGTGTCCCAAATTACT

>D8PAK:00049:00713
TACAAGATTGTATTCTGGCCCCCT

>D8PAK:00049:00715
ACATTTTCAGCATCCTATCGTTCT

>D8PAK:00022:00757
TACACTGACTGTGGCCCCCGATAC

>D8PAK:00023:00752
GATAAATTGTGGTTTGTCTTACAG

>D8PAK:00023:00755
TATTACTATGTGTTCCCCGATACA

>D8PAK:00023:00762
CAGCATTATGTATTACTGGCTACA

>D8PAK:00024:00752
AACGGGATTGTGACTCACGATACA

>D8PAK:00024:00768
GGACTGTGACGTATACTACAATCT

>D8PAK:00026:00771
GTCTTTAACTGTATGCTGGAACAC

>D8PAK:00028:00775
CACGTACTTGTAGCTCCGGACACA

>D8PAK:00028:00780
TTCGAGATTGTAGGCCGTACCACT

>D8PAK:00030:00757
GGACGATTGTGCCCTGCATTACAT

>D8PAK:00032:00757
AGCTTGATTGTGATCCTTGCTACA

>D8PAK:00034:00753
TTGTAGCGTGTATTACAAACTTAT

>D8PAK:00034:00755
CAACGGTTTGTAACCTGAGACACA

>D8PAK:00034:00784
ATACGATTTGTATGATGCGCTACT

>D8PAK:00035:00762
TTTCCAAATGTATTCCTGACCACA

>D8PAK:00035:00769
AAATTTGTACCCCCGATCACAATT

>D8PAK:00036:00756
TTGTAGCTCTCAATACAATGTGTA

>D8PAK:00036:00776
CCTCAACTGTAGCGCATCATACAA

>D8PAK:00036:00778
GTGTAATATGTATTCTATGATACT

>D8PAK:00037:00793
ATGTACCCCAGGTTACAATTTTTA

>D8PAK:00038:00765
TCTCGATAGTATGCTAGCCCACTA

>D8PAK:00039:00751
AAGTTATCTGTGCCTTAGGCTACA

>D8PAK:00040:00762
TGTTGAATAGTGGCCGAGGATACG

>D8PAK:00040:00766
AACTTCGCAACATCCCAAAAGTAA

>D8PAK:00040:00768
CGCGAATTTGTATGCTAAGCGACA

>D8PAK:00040:00770
ACTACAAATGTAGTACAAGCCACA

>D8PAK:00041:00781
TCTATTTTGTATGCTAGCCTACGA

>D8PAK:00041:00785
AACAGACTGTATGATAGGCTACAT

>D8PAK:00042:00769
CGACACTTTGTAGTTTACGGCACA

>D8PAK:00042:00794
CATTGTTTAACATCCACCTTCGAA

>D8PAK:00042:00796
GGTTTCTTTGTGTGCTGGACTCCA

>D8PAK:00043:00751
TAAGATTTTGTAATCTGGATCACA

>D8PAK:00043:00755
GTATGTATCCTGTAATACATTCTG

>D8PAK:00043:00757
CTAAACATTGTATGGCAGGGCACT

>D8PAK:00043:00766
CGCTCATTGTGACGTGGATCACAT

>D8PAK:00044:00751
GCGACCTTTGTATCACTGCATACA

>D8PAK:00044:00752
CAATCAAATGTATACTGAACTACA

>D8PAK:00044:00758
ATCCGACATGTAATTCACGCTACA

>D8PAK:00044:00782
GTTTTATTGTATTCCCGAATACGA

>D8PAK:00044:00786
TTTTGCAATTGTAATCCAGGCTCA

>D8PAK:00045:00773
GACTACATTGTAATCTTGAGTACA

>D8PAK:00045:00776
CAGATAGTGTCCCGCGCTACAATC

>D8PAK:00045:00789
GTTAAGCAACCATCCTGCAGCGGT

>D8PAK:00046:00767
ACTTAATTTGTAGCCACCACCACA

>D8PAK:00046:00775
TCACACTTGTATCCCAGAGTACAA

>D8PAK:00047:00754
CACGGAAATGTAAGAAGGCATACA

>D8PAK:00047:00773
ACAAATATTGTAGCTTCGGTCACA

>D8PAK:00047:00774
AAAAATTGTGCGTCCGCTCACAAT

>D8PAK:00047:00784
TCGTAACTGTGGTCTGTAATACAT

>D8PAK:00049:00782
GTCACATTGTAGCCCAGCTTACAG

>D8PAK:00049:00786
AATACAATTGTAAGATGCAGTACA

>D8PAK:00049:00787
TCAGGACTAGCATCCATGAGACGT

>D8PAK:00039:00801
ACTAAATTGTAGTCGCGCATACTT

>D8PAK:00040:00815
TCTGCTTTGTAGCTTGCACTACAT

>D8PAK:00041:00807
AAATACAGTGTATTCTATGCTACA

>D8PAK:00041:00825
ACTTGAATTGTGCAGTACACCACA

>D8PAK:00042:00811
TAGTAGAAAGTGTCCGGTGCCACA

>D8PAK:00042:00812
ACATTATTGTAACTCCGACACCCA

>D8PAK:00043:00806
AGGAAGATTGTATGATGAAACACT

>D8PAK:00044:00808
ATTCCGTTTGTATCAAGGCCTACA

>D8PAK:00044:00826
TGTTAGTTTGTAACTTGGGACACT

>D8PAK:00045:00835
TTGTAGTCTGTCTTACATTCTAAA

>D8PAK:00046:00811
TCTTGAATTGTATGCTGTACCCAA

>D8PAK:00047:00802
TAAAATGTAGTGTGGCATACAAAG

>D8PAK:00047:00822
AAATTGAATGTGTTGTGCGTTACA

>D8PAK:00047:00840
ATGTGCTTTGTAAGGTGGGATACA

>D8PAK:00049:00810
CTTGTAATAGTATCACAGCCCACA

>D8PAK:00049:00819
AACTGAAAAGTAACCCAGACTACA

>D8PAK:00050:00020
GCAAAATTGTAGTTTCAGGCACAT

>D8PAK:00051:00043
TTGTAGTCCGTATTACATTCGCGT

>D8PAK:00053:00048
TTAATAACTGTAATGCAGGACACT

>D8PAK:00054:00048
AATTTCAATGTGGGATGGGCTACA

>D8PAK:00055:00040
ACGTGCTTTGTAAGCTAGCTTACA

>D8PAK:00056:00024
AAAAATGCTTCATCCCATGTTGTG

>D8PAK:00057:00020
TTGTAGTCTGTACTACAATTTTCG

>D8PAK:00057:00022
GTTCGCAAGCATCCGTTCCTCAAG

>D8PAK:00058:00016
TTTTCGTTTGTAGTCCCTACCACA

>D8PAK:00058:00025
TTGTATCCTGGACTACATTATTTA

>D8PAK:00058:00034
TTTATGACCGTAGCCCCGCATACT

>D8PAK:00059:00026
TTACAAATGTGGTGTATAATACAC

>D8PAK:00059:00027
ATCTGCACTGTGGCGTACGCCACA

>D8PAK:00060:00011
TGTCGATTGTAGCCCGCGCTACAA

>D8PAK:00060:00034
GTCAGAAATGTAACCGAGAACACT

>D8PAK:00061:00017
CTGAAATGTATTCTGGACTACTAG

>D8PAK:00061:00039
AAAAGATTGTATTGAGGGTTACAT

>D8PAK:00063:00043
AATTACTTAGTAAGCTACGTCACA

>D8PAK:00064:00032
ACCTTAAGACATCCTAGAAATATC

>D8PAK:00064:00042
TTGTATTCTAGCTTACATCCTGTA

>D8PAK:00065:00044
AGGCACATTGTAACATAGCACACT

>D8PAK:00066:00042
ATGTGTGGCCCACATTACAATTTA

>D8PAK:00067:00047
ACTAAACCTGTATGATGCACCACA

>D8PAK:00068:00030
CAATGTGACTCATCCCACAATCTA

>D8PAK:00068:00033
TATGCCTTTGTATCCTAGACTACG

>D8PAK:00069:00012
GACACAAATGTGATGTGAGTTACA

>D8PAK:00069:00019
GCTGTCGCAACATCCTGGACCGCC

>D8PAK:00069:00032
CTGTAATCCCCACTACATTTCTCA

>D8PAK:00069:00044
ACAGAAAGTGTGGCTCACCTTACA

>D8PAK:00070:00043
ATATTCATTGTAGCCGAGATCACA

>D8PAK:00072:00032
TATTTAATTGTGTGGCATATCACA

>D8PAK:00073:00010
GAGGAAATGTAGTCTGAGTCACAA

>D8PAK:00073:00024
GAACGGTTTGTATTCTGACTTACA

>D8PAK:00073:00044
CCCCAAACGACATCCTCAAATTCT

>D8PAK:00075:00029
TGCGAACTTGTAGTCCTACATACA

>D8PAK:00076:00004
AACTAGCATCCCTTTATCCATCTC

>D8PAK:00076:00024
GGCCTAAGTGTAGCCTATGGTACA

>D8PAK:00078:00042
CAAAGCTTTGTAGTATAGATTACA

>D8PAK:00079:00017
TAAATTGTATTATGCACTACAATT

>D8PAK:00079:00028
ATCTCGATTGTAAGCACGGATACT

>D8PAK:00080:00025
ATGTGTTCTAGACTACAAAGATGG

>D8PAK:00081:00039
GATTAAAATGTAATCTATATCACA

>D8PAK:00082:00016
TATTTATCTGTATCACCGCATACA

>D8PAK:00082:00019
TCCGCCCATTCATCCTAAGTATGC

>D8PAK:00082:00023
TACCTGAATGTGGCCTGCGCTACG

>D8PAK:00082:00042
CTACAAATGTGGCGTGGGCCACAT

>D8PAK:00085:00012
AAGCAATTGTATCCGAGCCTACAC

>D8PAK:00087:00006
TTGCCCATTGTATTCCACAGTACT

>D8PAK:00087:00011
ATAGCCTTTGTATTATCCATTACA

>D8PAK:00087:00031
CTAATTGTAGGCTACCATACACTA

>D8PAK:00088:00030
GGCAGAAAAGTAATCCACGATACT

>D8PAK:00089:00013
GTTTGTACTGTATGGTAGAACACA

>D8PAK:00089:00014
AACGTGAGTGTATCTACGGATACA

>D8PAK:00090:00017
CGAACTGTAGCCGAGGCTACAATC

>D8PAK:00090:00026
TTTCAAATTGTATCAGGGACTACC

>D8PAK:00090:00030
CCTTTAATTGTATCAGGGAATACG

>D8PAK:00091:00015
GACGAGATTGTATGCTGGCATTCA

>D8PAK:00092:00007
CGGTAGCCCCATCCGCGATCTAAC

>D8PAK:00092:00017
CCAATTGTATCCTGGTGCACACTT

>D8PAK:00092:00037
TTCTGGTATGTGTTCTGGCGTACA

>D8PAK:00093:00005
TATAGAATACCATCCGCGTTACGG

>D8PAK:00093:00020
AACTTAATTGTATCATAGAAGACA

>D8PAK:00093:00022
TTTACGATTGTAGCATATATTACA

>D8PAK:00093:00044
TCACCGATTGTACGCTACATGACA

>D8PAK:00094:00007
GAAAATTCGGTAACCTAAATTACA

>D8PAK:00094:00032
ACCCACTTTGTGTGCTGCATTACT

>D8PAK:00094:00035
TTTTTTTTTGTATTCGAGCCTACT

>D8PAK:00096:00004
GTGTATCCAGGCATACAATTCCGC

>D8PAK:00096:00017
CCAACTGTGACCTGCATTACATTT

>D8PAK:00098:00022
GTCTGCTTTGTATGTGCGGTTACA

>D8PAK:00098:00046
AACTTCTTTGTACTATACACTACA

>D8PAK:00099:00022
CCGACAATTGTGCCCCGCACTACA

>D8PAK:00099:00039
AATAACATTGTGACCGGGCCTACA

>D8PAK:00050:00087
TTGTAGTCTAGAATACACTATCAT

>D8PAK:00050:00088
AATGCCCATCCTAATGTCTCCACG

>D8PAK:00050:00094
GTGTCCATTGTAAGCTAGGCTACT

>D8PAK:00050:00097
TTGAGGATTGTATGCCCCAACACA

>D8PAK:00052:00068
CCCAAGATTGTCACCCACAATACA

>D8PAK:00053:00050
AACAAATTTGTATGCCGGCATACC

>D8PAK:00053:00056
TGCTCAATTGTAATCCCGAGCACT

>D8PAK:00053:00067
TACATAATGTGATTCAGGCTACAT

>D8PAK:00053:00069
CTTCGAATTGTACCCTGTACTACG

>D8PAK:00054:00082
CGCGGGTTTGTATGTTAGAGTACG

>D8PAK:00055:00081
TCCGCAATTGTAGTCAAGCTTACA

>D8PAK:00056:00051
AACTGAACTCCATCCTGTAAAAGT

>D8PAK:00056:00059
AATAAAAGTGTGCCGCAGAATGCA

>D8PAK:00056:00097
TTGTATTCCAAGTGACAATTCAGG

>D8PAK:00058:00057
AACTGGATTGTAGCCCAAAACACA

>D8PAK:00058:00084
GACAGACTTGTGGTCCGGGCCACA

>D8PAK:00058:00086
AAATAGAATGTAGCTTGTGTTACA

>D8PAK:00060:00056
CTAGTGATTGTGGCCTAGCCTACG

>D8PAK:00060:00065
GTGTCAATTGTAGCCCATAACACG

>D8PAK:00060:00074
ATTAACTTTGTGATCGCGCTTACA

>D8PAK:00060:00087
TACTGAAACGTAAGCTACAACACA

>D8PAK:00061:00083
CATTGACTGTAGCTTACACTACAA

>D8PAK:00062:00050
ACCAAGATTGTGGTCTACGCGACA

>D8PAK:00062:00093
ATGTATCCTGGAATACATAATACT

>D8PAK:00063:00055
CACCCAAATGTATTCACGATTACA

>D8PAK:00063:00087
CGGTCAAATGTATTCTAGGTTAAC

>D8PAK:00063:00095
CAACATTGTATCATGGGCTACACC

>D8PAK:00064:00094
TCTCGCCTGACATCCGATTCTTTG

>D8PAK:00065:00067
CCTTCGAATGTAGTCCAAAACACA

>D8PAK:00065:00079
TTGTAGTACGCGATACAATTACAT

>D8PAK:00067:00071
AATTACCTTGTAGCCCAGGTTACA

>D8PAK:00067:00098
GTCTAAATTGTGCCCTAGCCTACA

>D8PAK:00068:00053
CATTAAACTGTGACCTGTAATACT

>D8PAK:00068:00060
TTACCGATTGTAGCCCAAGTCGCA

>D8PAK:00068:00085
TTGTATGCTGTAATACATACCAAT

>D8PAK:00068:00088
TTGTACGCTGGGCCACATAGTTGC

>D8PAK:00070:00098
ATCGGAATTGTATCTCACAATACT

>D8PAK:00071:00063
TTATAGTTTGTACTCCCCGCTACA

>D8PAK:00071:00082
AAGCTAATTGTATTCTAGAGCATT

>D8PAK:00073:00055
TTTCAGTTCGTATGCCAGCATACT

>D8PAK:00073:00082
ATATGGCATCCGTAGCGCTAGTCT

>D8PAK:00073:00086
ATGATTGTATTCTATATCACATTA

>D8PAK:00074:00083
ATGACAAATGTAAGCCAGACTACT

>D8PAK:00074:00096
TTGTAGCCTAGGCCACGTTCATAT

>D8PAK:00075:00075
CTCGTGACCGTAGGCTGGACTACA

>D8PAK:00075:00081
CAACACATTGTAAGCTGCAATACT

>D8PAK:00075:00099
TCCTCGATTGTGCTGCTGATCACA

>D8PAK:00076:00080
TGATTGTAGCGTAAACTACTTTTC

>D8PAK:00077:00069
CCAGAGATTGTAGGCTGACACACA

>D8PAK:00077:00079
ATTAATTGTATTCTGGAATACTGG

>D8PAK:00077:00085
CCACTGTTTGTATCCGAGAGCACA

>D8PAK:00079:00061
AAACATTATGTATTCCATGCTACA

>D8PAK:00079:00076
GTGTATCGTGGGATACAATACGGC

>D8PAK:00079:00080
TTCACTATTGTGTCGCAGGTTACA

>D8PAK:00080:00082
GAACGCATTGTGACCAGCGTTACA

>D8PAK:00080:00094
TCTGCACTTTGTAGCCCTGAATAC

>D8PAK:00081:00067
TACCAAAATGTAGCGAAGGGCACA

>D8PAK:00081:00085
CAAAAATAGTATCGCATATTACAC

>D8PAK:00082:00083
TTCGGACTTGTAACCTGCGTTACA

>D8PAK:00083:00066
TCGAGGACTGTGACGCCTGATACA

>D8PAK:00084:00091
GACAAACTGTAGTGTGGATCACAT

>D8PAK:00085:00067
TATAACTTTGTGTAGTAAGCTACA

>D8PAK:00086:00054
TCATAATTGTAGCACATAACACAA

>D8PAK:00086:00092
GTGTTGATTGTAGCCAGCGCTACA

>D8PAK:00087:00085
GTTCCAATTGTACTGAGGAACACA

>D8PAK:00088:00062
AGCTAGTTTGTACTCTCTCATACA

>D8PAK:00088:00079
AGGTCCACTCATCCAACATTTTTA

>D8PAK:00089:00075
CTGTATTATGGGTCACAAGTTGGT

>D8PAK:00090:00053
CTCGAACATGTAAGCTAGACTACG

>D8PAK:00090:00058
CTGTATGCTGGGTCACAATGCGCT

>D8PAK:00090:00061
ATGTATCCTGGGATACACTGTTAA

>D8PAK:00090:00077
GGGAACTTTGTGCCCTGGCACACT

>D8PAK:00090:00093
TCAATCTTCGTATTCTCACATACA

>D8PAK:00090:00099
TTTCGAACTGTGTCAAGGGTTACA

>D8PAK:00091:00093
TCTAGAATCGTAGCCTGACTCACA

>D8PAK:00091:00097
TACCGGATTGTGTTGCAACTCACA

>D8PAK:00092:00052
CCCAGATTGTAGGCCCCAATACAC

>D8PAK:00092:00064
ATCTCAATTGTATGACCGACTACA

>D8PAK:00093:00050
ATCGGTTGTGTATGTTCGCATACA

>D8PAK:00093:00064
GTTGAACATGTGATCTGGGCTACT

>D8PAK:00093:00066
CTAATGTTTGTAGCGTTGCATACA

>D8PAK:00093:00088
TTGTATTCCATATCACAGTCCTAT

>D8PAK:00093:00090
CATCTAAATGTAACTCAGATTACA

>D8PAK:00094:00061
AATTCGCCTCATCCTATTTTACTA

>D8PAK:00094:00081
TTCATATGTGTCCTGGGATACAAA

>D8PAK:00094:00084
GAAAAAAGTGTAGCGCCGCATACG

>D8PAK:00095:00050
CTCCACATTGTGATACCCGTTACA

>D8PAK:00095:00069
TCACAACCTGTGACCCGGATTACA

>D8PAK:00095:00080
AATAAAATGTAGCGTGGAATACAG

>D8PAK:00096:00053
TTGTATTGCGGGCCACACTTCCTA

>D8PAK:00096:00083
TTGTGACCCATGATACAGTTTCGC

>D8PAK:00096:00091
ACGGTAGGTGCATCCGAAACAAAG

>D8PAK:00097:00063
TTAAATCCTGTGTGCTGGGCTACA

>D8PAK:00097:00083
AAGGATTGTACTACAACATACAGA

>D8PAK:00097:00095
CTGTGATCCTGGCTACAATTTATT

>D8PAK:00098:00074
AACCGAAGTGTATGGTAGGCGACA

>D8PAK:00098:00080
ATACCAAATGTGATCCCGAACACA

>D8PAK:00098:00081
AAGAATTGTAATTTACACTACGTT

>D8PAK:00098:00094
TCCCTGATTGTAGTGTCGACTACA

>D8PAK:00050:00105
GATTGTGAGCTGGCATACTCTTTA

>D8PAK:00050:00139
TTGTAGTGTGGCTTACAAAGTATG

>D8PAK:00051:00110
TTGTATCCTATAATACAATTAATC

>D8PAK:00051:00140
TGGGTAAATGTAATCTGGGCCACT

>D8PAK:00052:00123
CTCTAGTTTGTGATCTTAGCTACA

>D8PAK:00052:00125
CCTCAGACTGTACTCTGTCTTACA

>D8PAK:00053:00101
TTTTGAAAGTGTGATCTAGACTAC

>D8PAK:00053:00102
GTGTAACCCACATCACAATTACAA

>D8PAK:00053:00127
TTACACTCTGTATTCTAGAATACT

>D8PAK:00054:00107
AACAATCTTGTATCCCAGGGCACA

>D8PAK:00055:00132
TGCAAAATAGTATGGTCGGATACA

>D8PAK:00056:00148
CTTTTAGGGCCATCCACTAGAGCC

>D8PAK:00057:00112
GTTTGGAATGTATCGCTCGCTACA

>D8PAK:00057:00121
AACGAGAGTGTATCCCACAATACT

>D8PAK:00057:00122
TTGTGCTCCCAAATACATTCATAC

>D8PAK:00057:00141
AACGAATATGTATCGTAGCCCACA

>D8PAK:00057:00148
TATTAAATTGTAGTCAGTCTTACA

>D8PAK:00058:00123
GCGAAATCTGTATCCTGGCATACT

>D8PAK:00059:00115
TGGATTGTATCTTAGGGCACACTT

>D8PAK:00060:00122
TTGTATGCTACATTACGTTTTTCC

>D8PAK:00060:00140
AAAAAGAGTGTATGCCACGTTACG

>D8PAK:00061:00133
GACTAGATTGTATTGTGAGATACT

>D8PAK:00061:00148
ATGTTAAGTGTAAGCTAGATTACA

>D8PAK:00062:00100
TTGTATGCCAACACACAATGCTTA

>D8PAK:00062:00122
GAGGTATTTGTACTCTGTGTTACA

>D8PAK:00062:00144
CTGACTTTGTGACCCTGAATACAT

>D8PAK:00063:00106
CCTAAGATCGTATGCTAGATTACT

>D8PAK:00063:00142
CCGCTTCCGCCATCCGACTACAGT

>D8PAK:00063:00145
CACCACTATGTGTTCTGCGATACA

>D8PAK:00063:00146
TTCGTAATAGTATGCCGAGCCACA

>D8PAK:00063:00149
TGTATTTCAGACTACAATCTCAAA

>D8PAK:00064:00116
CATCTAAATGTGCGCTACCATACA

>D8PAK:00064:00124
ATGGACAATGTATCCCACAGCACT

>D8PAK:00065:00102
CACCAGATTGTGTTTCCCAATACA

>D8PAK:00065:00115
CGAATACATGTAGTGTGGACTACA

>D8PAK:00065:00135
TTTTCGAACTGTGATCTCGCGTAC

>D8PAK:00066:00103
AGTAACAACGTGTCCACATATACA

>D8PAK:00066:00118
CGTTGACTTGTATTCCATAATACA

>D8PAK:00066:00135
ATTTAAAATGCATCCCTTGATACA

>D8PAK:00067:00116
AAGGATCTTGTATGTTACGTCACA

>D8PAK:00067:00122
TTGTACTCCAGGACACAGTGTCTC

>D8PAK:00068:00106
TGATACAATGTATGCGCTGCTACA

>D8PAK:00068:00126
ATGTTTTATGTACGGTGGCATACA

>D8PAK:00068:00127
CCCGAAGACGTATTCCCCGTTACA

>D8PAK:00069:00112
CATAGGACTGTAATCTAACTTACA

>D8PAK:00069:00114
GGTAAAAAGGTATTACAGAATACA

>D8PAK:00069:00124
CGGACCATTGTGACCTGTACCACA

>D8PAK:00070:00132
CGAGAAACTGTATGCCATACTACG

>D8PAK:00071:00142
AGCCACTTTGTAAGCCGTAATACA

>D8PAK:00072:00140
ATCTCTGTAACCAGGGGCACAATT

>D8PAK:00073:00100
TCTACGATTGTATGCTAGAAGACT

>D8PAK:00073:00116
TTGTACTCCGGACTACACTCGCAG

>D8PAK:00073:00118
TAGCTGATTGTAACCTGGCCTACA

>D8PAK:00074:00126
TTTGCGCGAACATCCTTAACCGGA

>D8PAK:00074:00139
AAAGAGATAGTGCTCGGCGTTACA

>D8PAK:00076:00114
TCGCAGAATGTGTCCCAGAGCCCA

>D8PAK:00076:00116
CATCAAACTGTAGCACCAGCTACA

>D8PAK:00077:00143
AACCGAACTGTATCGCTTGTCACA

>D8PAK:00078:00119
TATGACTTTGTGTCCCGTAATACA

>D8PAK:00078:00143
CAAACAGTGGTCCAGGCCACACTT

>D8PAK:00080:00142
GACTAATTTGTATGCGAGATTACA

>D8PAK:00081:00110
ACTTGTCATCCAAGAGTTCACGTT

>D8PAK:00081:00121
ATTGAAATTGTATCCTATCCTACT

>D8PAK:00081:00127
ATCCGAACTTCATCCAATATCCAA

>D8PAK:00082:00113
CCCGTAATCGTATGATAGATTACA

>D8PAK:00082:00120
TGAATCTTTGTAGGCTGTACTACT

>D8PAK:00083:00109
ATTCCAATTGTAGGCTAGGCCACT

>D8PAK:00083:00120
TATAAAATTGCATCGGGGATTACA

>D8PAK:00083:00137
ATACCAATTGTATTGCTCAACACA

>D8PAK:00083:00141
CTTTGAATCGTATCCGGGCATACA

>D8PAK:00084:00111
GCTTGAATTGTGTGGCATGATACA

>D8PAK:00087:00100
AATTGGAACTGTGTCCCCGCCCAC

>D8PAK:00087:00110
CTGTAGCGCAGCATACAAATGTAC

>D8PAK:00087:00115
CTGTCTATTGTAATTCACGACACA

>D8PAK:00087:00132
AAATATTTTGTATGCTCGATTACT

>D8PAK:00087:00147
TACAGGTTTGTGGGCCAGGCTACA

>D8PAK:00088:00103
GAGGGAATTGTATTGTAGAATACT

>D8PAK:00088:00108
TTGTGTTCCCGAGTACAATTGCCC

>D8PAK:00088:00131
CTGTAGCCGAGGTTACAATCCGTA

>D8PAK:00088:00142
CACTACACTGTAATCTGGGCTACT

>D8PAK:00089:00119
GGCCTAATTGTAACCCGTGGTACA

>D8PAK:00089:00138
GGGCTGAATGTGTCCAGGGTCACA

>D8PAK:00090:00116
GTTAAAATGTATGAGGGAATACAT

>D8PAK:00090:00135
AACAAACTTGTAATTCCGACTACA

>D8PAK:00091:00142
GCTCATTTGTGTTCCAGAGTACAT

>D8PAK:00091:00148
GGCAGATTTGTGCCCTGCAACACA

>D8PAK:00092:00104
GACCAGAATGTATGCCAGGCTTCA

>D8PAK:00093:00116
GCCGTAATTGTGCTTGGAGATACA

>D8PAK:00093:00117
CCGCAACTTGTGCCCCCGACTACA

>D8PAK:00093:00130
GATATCTCTGTATTCTAAGTCACA

>D8PAK:00093:00136
AACCAATTTGTATTGGGGAATACT

>D8PAK:00093:00145
CAAACTGTAGCCCTGACTACAGTA

>D8PAK:00094:00130
TGGCCGAATGTGTCCTGCGCTACG

>D8PAK:00095:00104
AGATAACTGTATCCCAGAATACTT

>D8PAK:00095:00107
ATTATAATTGTATTGTATGATACT

>D8PAK:00097:00137
TTGTAGCGGAGATTACATTTGTCA

>D8PAK:00097:00147
CATCCTTTTGTATGCTGGATCACT

>D8PAK:00098:00103
TCTCCTTTTGTATTCCGTGTTACA

>D8PAK:00098:00139
TCGATACCCGCATCCTTATGTTTT

>D8PAK:00099:00108
TTCTGAACTGTAAGACAGGCTACA

>D8PAK:00050:00171
ACTTAGACTGTGGGCGCCATTACA

>D8PAK:00051:00178
AGTGGTTGTGTATCCTAGAATACT

>D8PAK:00052:00155
TTCGAGTTTGTGTGCTGAAACACA

>D8PAK:00052:00161
ACGCAACTGTGGGCCAGCTCACAT

>D8PAK:00052:00170
ATGTGACCTGCGATACACAATACA

>D8PAK:00052:00196
TTGTGTCCCACACTACACGATGCT

>D8PAK:00053:00179
AATCAAGTGTATCCTAGGGCACAC

>D8PAK:00054:00160
ACGGAGATTGTAGCATGGGCCACA

>D8PAK:00055:00160
TCAAACATTGTAAGTCAGACTACA

>D8PAK:00055:00166
TTGTAGTCGGCCCCACAATTCCCT

>D8PAK:00055:00172
AAAAATGTGCCCCACGTTACACAT

>D8PAK:00055:00191
TTGTACCGTACACCACAATTCGTC

>D8PAK:00055:00196
TAACTCTATGTAGTCTGAGCTACA

>D8PAK:00057:00199
AAAACCATTGTATGACAGGATACT

>D8PAK:00058:00150
GTGGAATGTGTGTCCTGGCCTACA

>D8PAK:00058:00159
GTCATAACTGTGATGCATAATACA

>D8PAK:00058:00173
GGATTGTAAGCCAAACTACTATCA

>D8PAK:00058:00187
ACTTAATCTGTATCCTGCGTCACA

>D8PAK:00059:00184
TGCTGGTTTGTGACCAGCGATACA

>D8PAK:00059:00193
CACCGAATTGTATCTGAGGCTACT

>D8PAK:00060:00159
CCTATGATTGTAGTTTGAGATACA

>D8PAK:00060:00180
GGCTAGATTGTATTTTGGAACCAT

>D8PAK:00061:00183
TTGTGTGCTAAGATACAAATACTT

>D8PAK:00061:00186
TTGTGCCCGAGCATACAAACCTCG

>D8PAK:00061:00190
TTGTATGACCAGCCACAGTTTCAA

>D8PAK:00061:00191
CTCACGACTGTGCTTTAGGTTACA

>D8PAK:00061:00199
TTATAGAATGTAGTCCGCCTTACA

>D8PAK:00062:00159
ACACCCATTGTGATCCAGATCACT

>D8PAK:00062:00165
TAAAATGTGTATTCTACATTACAA

>D8PAK:00062:00177
TTACAGAAATGCAGTCTGGAATAC

>D8PAK:00062:00199
AACTAAGCTGTATTCTAACGTACT

>D8PAK:00063:00165
TCTAAAACTGTGGCCTGCGCTACT

>D8PAK:00063:00192
CTGTTTTGCCATCCAGTTTGTTCC

>D8PAK:00064:00156
TGATAGATTGTGACGGGAGTTACA

>D8PAK:00064:00169
TACGCATCTGTAACCTGGCGTACA

>D8PAK:00065:00169
TACACCTTTGTGTCCCAGGCCACA

>D8PAK:00065:00171
TTGTGGCGCATGACACACTTAGCT

>D8PAK:00065:00183
CTTCCAATTGTACGATACACTACA

>D8PAK:00066:00151
TAATTCTAATTCACGTAGCATTGA

>D8PAK:00067:00174
AAAAATTTTGTAACTCCAATTACT

>D8PAK:00067:00175
GTGAACTTTGTGGCCCTGGACACA

>D8PAK:00068:00154
CCCAATAGTAGCCTGCGTTACATA

>D8PAK:00068:00156
GAGCTGATTGTGTGCTGTCGTACA

>D8PAK:00068:00183
TCGATTGTGCCCAGGCATACACTT

>D8PAK:00068:00198
TTGTCAATTGTAATGCATGCTACA

>D8PAK:00069:00150
CGGCAACTTGTACGTTAGGACACA

>D8PAK:00069:00155
AATGTAATTGTAGCGCTTACTACA

>D8PAK:00070:00171
GAGAATTGTAATGCGGCGTACATA

>D8PAK:00070:00179
CTCAGGATAGTATCCCATGCTACA

>D8PAK:00072:00151
ATATCAATTGTACGCTAGGCTAAT

>D8PAK:00072:00175
TTGTATGCTGTAATACTTTGTCGT

>D8PAK:00073:00185
TTGTATTCTGCGTTACACTTTAAG

>D8PAK:00073:00195
CTAGCGATTGTATGATAACCTACA

>D8PAK:00074:00180
GTGTTAAGTGTAGCACAGATTACG

>D8PAK:00075:00154
CTCCGATTTGTGCCCCAGCCCACA

>D8PAK:00075:00163
TAAGTAATTGTGGGGTATGTTACA

>D8PAK:00076:00172
CGGTCCTTTGTAAGCTCCGCTACA

>D8PAK:00076:00173
CTTAACATTGTGAGCCGCAATACA

>D8PAK:00077:00171
TCCGAGAATGTGGCCCAAGTCACT

>D8PAK:00077:00173
TAGACTAATGTAGTTCGGAATACA

>D8PAK:00079:00178
CTTCAAAAAGTATCCTACCCTACG

>D8PAK:00080:00191
TTGTAGTCTACAATACATGTTTAA

>D8PAK:00081:00185
GCGCTCTCTGTAGCTTGGCATACT

>D8PAK:00081:00194
CTCAGGACTGTATTCCGGGCTACG

>D8PAK:00081:00198
ACGATAACTGTAGTCAAGCATACA

>D8PAK:00082:00159
TGATCGATTGTGTTCTCGGATACT

>D8PAK:00082:00171
GATAATTTCGTGTGCCCGCATACA

>D8PAK:00082:00176
TTGTATGCTACGCTACGAATACAC

>D8PAK:00083:00150
ATGACAATAGTAAGCGAGGATACA

>D8PAK:00083:00153
GCTTCGATTGTAGTCCGCACCACA

>D8PAK:00083:00157
CGCCCGATTGTAGCCTAAGATCCA

>D8PAK:00083:00170
ATAAAAATAGTAGTATAAACTACA

>D8PAK:00083:00187
AGCACGATTGTAGCTGGGAATACG

>D8PAK:00084:00162
TCGTGATTTGTGACCTGGCATACA

>D8PAK:00084:00178
GCCAACTTTGTATTCTACGATACG

>D8PAK:00086:00163
TCTCAATGTGTAACTAGGGCTACA

>D8PAK:00087:00151
TATTCCTTTGTAGCCTGCGATACT

>D8PAK:00087:00194
AGACAATTTGTAAGCTAGCGTACA

>D8PAK:00088:00150
CATAAGATTGTATGACAGCGCACA

>D8PAK:00088:00154
ATATCATTGTGACCTGGCACACAC

>D8PAK:00088:00177
TTGTCAATGTGACGTAGATCACAG

>D8PAK:00088:00193
GTTAGATTGTATTGTATGATACAC

>D8PAK:00089:00156
AATTGCATTGTATCGTAGACTACT

>D8PAK:00090:00158
CCAAAAAGAGTATGCTGTGACACA

>D8PAK:00090:00168
TCGTCGAATGTAGCCTAACACACA

>D8PAK:00090:00177
ATGTATCATAGCCTACAATTCCAC

>D8PAK:00091:00157
CATGAATTGTAGTGAATGTCACAT

>D8PAK:00092:00168
TATACATTGTGCCCCAGCCCACGT

>D8PAK:00092:00199
AATAGAACCGTAGCCGAGGATACT

>D8PAK:00093:00171
AAAAAGATTGTATTACGTGCCACA

>D8PAK:00093:00195
CTAAAAAGCGTGGCCTGCGCTACA

>D8PAK:00094:00155
TCACACTTTGTAACACACACCACA

>D8PAK:00095:00162
ATGTGCTCTGCGATACAATGAATA

>D8PAK:00095:00181
ACTCAAATTGTGACCTCTACTACT

>D8PAK:00095:00195
GACCTATATGTATCGTAGAGCACT

>D8PAK:00095:00196
CTAGTAACTGTATTGTTGGCTACA

>D8PAK:00096:00150
CAAACAATTGTGTATTAGCATACA

>D8PAK:00096:00153
CCCTCCTTTGTACGTTGGGTCACA

>D8PAK:00097:00152
AAGTTTGTGGTCTACAGTACAATC

>D8PAK:00097:00153
TCCTTAATTGTATTCCATGTTACT

>D8PAK:00097:00171
GTCCTAAATGTATTTTGCCTTACA

>D8PAK:00098:00151
AAACGAATTGTGGCCTAGGCTACT

>D8PAK:00098:00170
ATCAAATTGTAGCCTGGAATACAG

>D8PAK:00098:00186
TTGGAGAGTGTATTCTACGATACA

>D8PAK:00099:00159
CTTGCGATTGTAATACATACTACT

>D8PAK:00099:00196
TGATGCATTGTAATACAAGTCACA

>D8PAK:00050:00205
AATCACAATGTGACCCGAGTCACA

>D8PAK:00050:00213
ACTCGAAATGTGAGCACGAATACA

>D8PAK:00050:00218
CAAGAGATCGTGCTCTGGCGTACA

>D8PAK:00050:00225
TAGCGAAACGTAATTTGGACTACA

>D8PAK:00050:00243
ATGTAGCCCGGTCACCAATCTAGT

>D8PAK:00051:00219
CACCTGATTGTGTCCCAGCATACT

>D8PAK:00052:00207
TTGTAGCATGAGTCACAATGTTCC

>D8PAK:00052:00209
CTGTATTCTGAACTACTATTTACA

>D8PAK:00052:00243
TACGGTCTTTGTAATCTGCAGTAC

>D8PAK:00053:00203
TTAATAATTGTAATTCACAATACA

>D8PAK:00053:00240
GCGTCGATTGTAGTCCAAGACACA

>D8PAK:00053:00244
AGTTTTTTGTAGTCCAGCGTACAT

>D8PAK:00054:00215
ATAGGAGTGTAAGCTGAAATACAT

>D8PAK:00054:00216
TGTAACTTTGTAATCTACTGCACA

>D8PAK:00055:00219
ATCTCAATTGTGACTTCGAATACG

>D8PAK:00055:00235
AACAAATAAGTGGGCCGTACTACA

>D8PAK:00056:00213
GAGTACTTTGTATCCAGCAGCACA

>D8PAK:00056:00217
TGTTTGTATCCCACGTTACATTTC

>D8PAK:00056:00235
TTCTATGATCATCCAGGTTAGGCA

>D8PAK:00056:00242
GCAAAAATTGTATGCTGCGTTACT

>D8PAK:00058:00204
AACGATCCTGTATGCTAAAATACA

>D8PAK:00058:00208
AATCGTATTGTATCCCCCGATACT

>D8PAK:00058:00232
AAACTGAATGTATCTTGGAGCACA

>D8PAK:00058:00233
CATCTGATTGTAACTCCGGACACA

>D8PAK:00059:00201
GTGCTATTTGTATTCTGCATTACA

>D8PAK:00059:00229
AATTAGAAAGTAATATGGTACACA

>D8PAK:00059:00245
TTGTAGCCCAAGATACTTATGATG

>D8PAK:00060:00202
GGTAACTGTATTACGGAGTACATT

>D8PAK:00060:00207
TTCCGTAAGCATCCGGTAACAGCA

>D8PAK:00060:00243
CTCAAAGATTGTGCTCTGCGCCAC

>D8PAK:00061:00208
TACACAAACGTGCCCTGTAATACG

>D8PAK:00061:00210
TCCATCTTTGTACTCCAAAATACA

>D8PAK:00061:00222
TATAGAATTGTGATCTGATATACA

>D8PAK:00061:00225
GCTTCATTTGTAATCTACACTACT

>D8PAK:00061:00248
TTGTGCCCTACCATACAGTTCGAT

>D8PAK:00062:00237
AGTGGAAATGTGTCCCCGGCTACA

>D8PAK:00063:00221
TATAGGATTGTGACCCTGGTTACA

>D8PAK:00064:00207
GGCAATGGCATCATCCAATCAATT

>D8PAK:00064:00236
CTCTAAACTGTGTTCTACGTCACA

>D8PAK:00065:00206
TTTAAATTGTGTGCTAGACTACGG

>D8PAK:00065:00227
AAATCGAGTGTGCCTTAGCTCACT

>D8PAK:00065:00235
TCAAGATTTGTATTCCTCCCCACA

>D8PAK:00065:00237
AGCATTGTGTCTCAGATCACAAAG

>D8PAK:00066:00200
CGTATGTTTGTATTCGAGCGTACA

>D8PAK:00067:00231
AGGTCAACTGTGACTTAACATACA

>D8PAK:00067:00235
TATTTATTTGTGTTCTGGCCCACA

>D8PAK:00067:00244
AAGGGATTTGTGTCTCAAATCACA

>D8PAK:00068:00223
CATCAAATCGTGCTCTATAGTACA

>D8PAK:00070:00225
AAGATTGTATGCTAACATACTCTT

>D8PAK:00070:00229
CCTCAGATTGTATGACAGCAAACA

>D8PAK:00071:00200
TCAAAAGTGTGCTCCACACCACAA

>D8PAK:00072:00227
ATACACAAATGTATTCTGGCTACT

>D8PAK:00072:00233
TTGTGGGCTAGGTTACTTTTTGCA

>D8PAK:00072:00241
ACAGAAATTGTAACCTAGAACCCA

>D8PAK:00074:00208
GCCTAATTTGTAGCTCCGGACACT

>D8PAK:00074:00218
AATAGAGATCCATCCGTAGTCCAC

>D8PAK:00074:00237
CAATTGTATCCCGGCCTACACTTT

>D8PAK:00075:00213
TTGTATGCTAGATTACAAAGTACA

>D8PAK:00075:00215
GCCGGTCGATCATCCTGTACGGGT

>D8PAK:00075:00237
CAATATTTGTAGCTCAGACTACAA

>D8PAK:00076:00216
ATTGCGAATTGTCACCTGGCTTAC

>D8PAK:00076:00229
TTTTCAACTGTATTCAGGGATACA

>D8PAK:00077:00233
CAGTCGATTGTAACAGAGCTCACA

>D8PAK:00077:00235
ATTACGAACTGTGCTCTGAGCCAC

>D8PAK:00077:00241
CCATAAAATGTACGCCAACACACA

>D8PAK:00078:00204
AATTGAAATGTATCGCAGGTTACA

>D8PAK:00078:00207
TATCCATTTGTGCCCTGTAGTACA

>D8PAK:00078:00209
GTGCTAACTGTGATTCTGAATACA

>D8PAK:00079:00228
TAGCTAATTGTATGTTAAGACACA

>D8PAK:00080:00201
TTCAGATTGTGGTCCAACCTACTA

>D8PAK:00080:00223
AATACAATAGTATTGTACACCACA

>D8PAK:00080:00236
AACACAATTGTACGCCCGACTACA

>D8PAK:00080:00242
GGTGGAATTGTGGCCCAGTTTACA

>D8PAK:00081:00216
ATGCATCATCCGGCTAATCCGATT

>D8PAK:00082:00222
CCCCTATTTGTATGCAGTGTTACA

>D8PAK:00082:00227
AATTTCATTGTGGCCCTAGTTACA

>D8PAK:00082:00230
GCACGCATTGTGCTCTAGCATACT

>D8PAK:00082:00236
AGCCACATTGTGAGTTACGATACA

>D8PAK:00082:00246
GGTGAAACTGTAACTTACCATACA

>D8PAK:00083:00246
TAGTATTCTGGACTACTATTCAGG

>D8PAK:00084:00202
CTGTGGTCTCGGATACAATTGACT

>D8PAK:00084:00211
ATTTGATGTGTATCGGTGGATACA

>D8PAK:00084:00230
TGTTAATTGTGGCCTGTAATGCAC

>D8PAK:00084:00242
ATTATAAAAGTAGCCGGCCCTACA

>D8PAK:00085:00221
TACCAGAATGTCTTCTGGACCACA

>D8PAK:00086:00222
ATGTAGCCTGTGACACAAATCTGT

>D8PAK:00086:00247
GTGTGAACTGTATTCCCGGTTACA

>D8PAK:00087:00230
GACTGTATGCTAGGCTACTTTACA

>D8PAK:00087:00238
GTGCGAATTGTATTCAACGTCACA

>D8PAK:00088:00209
TCGATTATCTCATCCTAAATCGGT

>D8PAK:00088:00240
GATGGAATCGTAATATGGCCCACA

>D8PAK:00089:00212
ACCGCATTGTATTCTCGCGTACAA

>D8PAK:00089:00235
CCTCTAGTTGTAGCCCAGACTACA

>D8PAK:00089:00248
TTGTATTCCTCACCACAATAATTC

>D8PAK:00090:00212
TGTAATCCAGGTCACATTTAGGAC

>D8PAK:00091:00225
TTGTGACCTTGATTACAGTTTAGC

>D8PAK:00091:00230
GTAGCGATTGTAATGTGAGGCACA

>D8PAK:00092:00214
GCCCCGACTGTAGTGCTAGATACA

>D8PAK:00092:00222
TCAACGATTGTAGGCCCGCCTACG

>D8PAK:00093:00209
TATAGTTCTGTAATCTACAATACA

>D8PAK:00093:00233
ATGTAGCCTGGCCTACACTTTGTA

>D8PAK:00093:00234
TGAATTGTGCGCTGGGCTACACAG

>D8PAK:00093:00245
CGTAACATTGTATCAGGGATTACA

>D8PAK:00093:00249
CATTACATTGTGTCTTAGAATGCA

>D8PAK:00094:00207
TCACCATATGTAGCGTACCATACA

>D8PAK:00094:00213
GGGATTGTGACCTGAGCCACAATT

>D8PAK:00095:00201
AAGTCAACTGTATCCCACGATACT

>D8PAK:00095:00226
AACAGTTATGTATTCTAGGGCACA

>D8PAK:00096:00208
AAACCGTTTGTAGTCAAGAATACT

>D8PAK:00096:00234
TGGAACTTTGTAGTTTACATCACA

>D8PAK:00096:00241
TAGTAACCTGGAATACATTCCTCA

>D8PAK:00096:00242
ATGTAGTGTAGCTCACAATCCCAA

>D8PAK:00098:00222
CAAAAATTGTATTGTGCAGTACTA

>D8PAK:00098:00227
CTGCTCACTGTGACGTAGAGTACA

>D8PAK:00098:00234
CTCCACATTGTAATCTATGCTACA

>D8PAK:00098:00237
TTGTGACCCTTAATACAATCCGTC

>D8PAK:00098:00242
AGTAGGATTGTATTGCAACTTACA

>D8PAK:00099:00228
GTTCCAAATGTACTACGGGTTACA

>D8PAK:00099:00242
CACAGAATTGTATCCCACACGACA

>D8PAK:00050:00280
TCAAGTGTGACCCATGCTACATTT

>D8PAK:00050:00290
CCGCCGAGACCATCCTGGGGTTGA

>D8PAK:00050:00297
TTTTCGTTTGTAGTCCCTACCACA

>D8PAK:00051:00256
TATTCTGTATGCGAGAATACAATC

>D8PAK:00052:00250
GGTTCAACAGTAGCCCAGCACACA

>D8PAK:00052:00251
CAGATGGGCCATCCAGGCCCCGCC

>D8PAK:00052:00266
TTCGTGTGTGCATCCCCGCTTCAC

>D8PAK:00052:00288
TTAGAAATTGTAGACTAGCCTACA

>D8PAK:00053:00286
TGTTAGTTTGTGATCACGCATACA

>D8PAK:00054:00253
AATCAGACTGTATCTCAAACCACA

>D8PAK:00054:00275
ATGTATTGTACCACACAATTTCAA

>D8PAK:00054:00279
CACGGGATTGTGTTGTGAGACACA

>D8PAK:00054:00294
AATTCGAATTGTGTACTGGCATAC

>D8PAK:00055:00253
TGTTTTAACTGTAGTCGGCGTCAC

>D8PAK:00055:00272
AAACTCATTGTATGTCAGGCTACT

>D8PAK:00055:00278
GTTAACACTGTATCCGTGAATACA

>D8PAK:00055:00284
GCCATAATTGTAGTTCACGATACT

>D8PAK:00055:00288
TTGTGGTCTAGATTACAGTCTTCC

>D8PAK:00055:00298
ACAGAATTGTATGCTACGCCACGG

>D8PAK:00056:00271
CTAGACATTGTAACATGGCCTACA

>D8PAK:00056:00275
GGTAACTTTGTGTACTGGCTTACA

>D8PAK:00057:00262
TTGTAGTCTGTACCACAATCGCGA

>D8PAK:00057:00290
TATAGAAACTGTATTGTACCATAC

>D8PAK:00057:00299
ACCCAAATAGTGGCTTAGGCCACA

>D8PAK:00058:00252
CTCCGAATTGTAGTATACGTTACA

>D8PAK:00058:00256
CAATAATTTGTGGTCTAGATCACA

>D8PAK:00058:00264
TTACCTATTGTGACCCATGATACA

>D8PAK:00058:00297
AACACCATTGTATGACAGCACACA

>D8PAK:00059:00251
GTACACTTTGCACGCTATAATACA

>D8PAK:00059:00260
TAAATGTGACCCACAATACAAAAC

>D8PAK:00059:00267
TGGTGGGGTGCATCCCGTACTGAT

>D8PAK:00059:00285
TATAGATCTGTAATACAGCATACA

>D8PAK:00060:00261
GGTTTAATTGTAGTTTAGATCACA

>D8PAK:00060:00296
TGGACGTTTGTATGCTGGGCTACA

>D8PAK:00061:00277
AACGCAATCGTAACGCGCGCCACA

>D8PAK:00061:00290
GTCATTCTAACATCCGATCGTGTC

>D8PAK:00061:00294
TGTCTAATTGTCTGCCAGACCACA

>D8PAK:00062:00278
TGTTCAATTGTATGCTAGCCGACA

>D8PAK:00062:00286
TTGTATCCTACCTCACATTGTTGC

>D8PAK:00062:00292
CGTAACATTGCATCCTAGACTACG

>D8PAK:00063:00264
TATCAAAGTGTATTATGTGGCACA

>D8PAK:00063:00282
TATTTCTTTGTATGCCCTGCTGCA

>D8PAK:00063:00299
GAAAATTTGTAATCTATCCTACAA

>D8PAK:00064:00263
GCCTTCATTGTGGCCCAAATTACA

>D8PAK:00064:00274
AGAAACTTTGTATTCCAAAGAACA

>D8PAK:00064:00278
ACTAAACCTGTAGTCTCTCATACA

>D8PAK:00065:00272
CTTTGTGCGCTAGATTACTTTTTG

>D8PAK:00065:00275
CAACCTGTATTACAGGGCACAATT

>D8PAK:00065:00284
ATTAAACTGTGCCCAGCAATACAC

>D8PAK:00065:00290
CCTGTGTTTGTATTCGGGGATACT

>D8PAK:00065:00296
AATATGGTGGCCCAGATCACAATT

>D8PAK:00067:00294
TATTACATTGTAGCCATAGTCACA

>D8PAK:00069:00253
ATAATTTTTGTGTCCCTCGCCACA

>D8PAK:00069:00278
CGCTCGATTGTAACATGTGATACA

>D8PAK:00069:00297
GCACCAACTGTATTCGACACTACA

>D8PAK:00070:00259
AGTATAATTGTAGCTTAGGACACT

>D8PAK:00070:00261
CTTAATATTGTAGCGCGTACTACA

>D8PAK:00071:00258
GGACACATAGTATTCCAGCAGACA

>D8PAK:00071:00264
GCTACTTATGTATCGTAGATTACA

>D8PAK:00071:00277
AAACATGTATCCGGGAATACAAAC

>D8PAK:00071:00292
GTTTGTATTGTATTCCCGCACACA

>D8PAK:00072:00276
ATGCTCTTTGTATCCCAGATTACT

>D8PAK:00073:00263
CTGGTCTTCGTATTCCACATTACA

>D8PAK:00073:00268
ATCCCACTTGTAGCTTGAGCTACA

>D8PAK:00073:00288
GTGAATTTTGTGCTATAGGACACA

>D8PAK:00074:00256
CTGTGTCCTGGCATACTATAGTTT

>D8PAK:00074:00258
TTGTGGTCCCGGTGACAATCTGAT

>D8PAK:00074:00259
TGTTGGTCATCATCCAGCCCTCTG

>D8PAK:00074:00264
CTCCAAATTGTGTGCCACGATACT

>D8PAK:00074:00266
AGTTTAATTGTGATTTGAGCTACA

>D8PAK:00075:00260
TCGGTCTGGCCATCCTTATATCCT

>D8PAK:00075:00280
TAAAACGTATCCTATGCCACAATC

>D8PAK:00075:00291
CGCTTAATTGTATGCTACACAACA

>D8PAK:00076:00274
CTGTGTCGTGGCATACACGTTTTC

>D8PAK:00077:00250
GCTACGACTGTACTGCGGGTTACA

>D8PAK:00077:00252
CCTTGGAATGTAATACACGCCACA

>D8PAK:00077:00281
TCTAGATTTGTATTGCGCACCACA

>D8PAK:00078:00278
AGAATGTGGCGCAGGATACAAATT

>D8PAK:00078:00292
GCCAACATTGTGCTGTAGGCTACT

>D8PAK:00079:00267
GATTCGATTGTATCACATGTCACT

>D8PAK:00080:00288
ATCCATTTGGTAGCCTGCACTACA

>D8PAK:00081:00297
TAACTTTGTATCCCCGCTTACTGA

>D8PAK:00082:00292
ACTACGATTGTATTATATGATACA

>D8PAK:00083:00258
GTTGGAATTGTAGCCTGCACTTAC

>D8PAK:00083:00260
TCGGCAAATGTGCGATGCGATACA

>D8PAK:00083:00273
AACTAAAATGTATTCACGAATACT

>D8PAK:00083:00277
ATCTTAAATGTATGCGAAGTCACA

>D8PAK:00083:00280
AACCTCATTGTATTAGGGGCTACA

>D8PAK:00083:00294
GACTACTCTGTATGATGGAATACA

>D8PAK:00083:00297
GACATTGTGTTGCAGGCTACAATG

>D8PAK:00085:00250
GTTAAGACTGTGGTATGTAATACA

>D8PAK:00085:00285
CATTTAAATGTGTCCGTGAATACA

>D8PAK:00085:00292
TTTTAGTTTGTAGCCTGAGATACA

>D8PAK:00086:00267
GTGGACTCTGTAACCTGAATTACA

>D8PAK:00086:00277
GCATGGATAGTATCCCAGGATACT

>D8PAK:00086:00285
CCTGCGTTTGTGATCCCGCATACT

>D8PAK:00087:00285
TTGTATCATAGACTACATATTACA

>D8PAK:00088:00272
AACCATTGTATGATAGGCCACAAA

>D8PAK:00089:00265
TGAACGATTGTATTCCGCGATCCA

>D8PAK:00089:00278
ATTTTTATAGTACTCGGGCATACA

>D8PAK:00090:00299
TTACACTTTGTAGTGTAAGTTACA

>D8PAK:00091:00254
GTGTATGGCCTAATACAATTATAG

>D8PAK:00091:00270
CGTGAATTTGTATCTTAAAATACA

>D8PAK:00091:00282
AACCTATTGCGTCCCAGAATACAA

>D8PAK:00091:00285
CTGACGACTGTAGCTTGGCCCACA

>D8PAK:00091:00289
TTGTAGCCTAGATCACAATACTCG

>D8PAK:00091:00296
TCTCACTTTGTAACAGGCGACACA

>D8PAK:00092:00253
AGAGCAAATGTAAGAGGGGACACA

>D8PAK:00092:00283
AGCTCGATTGTAGCCTGTGCTACG

>D8PAK:00092:00299
AATATATCTGTAATCCACGACACA

>D8PAK:00093:00264
TATCTGTCTGTAGTCTAGACCACT

>D8PAK:00093:00270
CACAGACTGTGTCTTACATTACAA

>D8PAK:00093:00282
GCACCAATTGTATGAAAGGTCACA

>D8PAK:00094:00278
TTTTACTTGTATCCCATGCTACAT

>D8PAK:00094:00281
AAACTGATTGTGTCGTGGGTCACT

>D8PAK:00094:00294
GTCCGAATTGTGCTCCGTAGTACA

>D8PAK:00095:00256
TTGTATTGTACGTCACATATGTAT

>D8PAK:00095:00285
ACCTACGCCCCATCCAAGTATGAT

>D8PAK:00096:00252
CGTAACTATGTGTTTCGCAATACA

>D8PAK:00096:00287
TTCTAGTTTGTATCTCCGGCCACA

>D8PAK:00097:00261
GTAGAGCTTGTATGGTGGAATACA

>D8PAK:00097:00268
ATCTTTAAGTGTAGTCCGTATTAC

>D8PAK:00098:00296
TCAAGATTTGTATTCCTCCCCACA

>D8PAK:00098:00297
TTTAAACTTGTATCTCAGGCCACA

>D8PAK:00099:00259
ACGTAGATTGTGGCTTACATTACA

>D8PAK:00099:00269
TGATTGATTGTGGCGCCAGTCACA

>D8PAK:00099:00294
CATTAAAATGTGCCCTCCGATACA

>D8PAK:00099:00296
TCTCGCTTTGTAAGCCGTGATACA

>D8PAK:00050:00315
TGAAATGTGCATCCGGACACAATC

>D8PAK:00050:00340
AACGTAATTGTATCCTACGCCACT

>D8PAK:00051:00334
TCTTAATTGTGGTCCAAAGTACAT

>D8PAK:00052:00305
GAACAGACTGTAATCTACACCACA

>D8PAK:00052:00308
TAAATTGTGACCCATGCTACAATC

>D8PAK:00052:00317
AAACACATTGTGTTCTGGGTCACC

>D8PAK:00052:00332
TTCCCGATTGTATCACTAATTACA

>D8PAK:00052:00344
TCCGCCAATGTATCATAGGCTACA

>D8PAK:00053:00323
CAACATTGTAACCTATGCTACCTT

>D8PAK:00054:00303
AATGTAATTGTGTCCTGCACTACG

>D8PAK:00055:00317
CTCCAACATGTGTTCTCAAATACA

>D8PAK:00055:00335
TTTATGGACCCATCCGCAGGCCTG

>D8PAK:00056:00300
TCGTAATCTGGACTACAATTCCGC

>D8PAK:00056:00322
CTGTATGCTTACATACAATTACAT

>D8PAK:00056:00334
TCCATTTCGTCATCCCCACACACT

>D8PAK:00056:00336
ACTGCTACTGTATTATACGCTACA

>D8PAK:00057:00303
CAAAGAAATGTGTCCTACCATACG

>D8PAK:00057:00306
AGATGAATTGTACCTTAGCATACT

>D8PAK:00059:00334
ATTGCATTTGTGGTGTAAACTACA

>D8PAK:00061:00323
GAGTAAAAGTAGTCTGGCTCACAC

>D8PAK:00061:00349
TAGGATATTGTATGCTAGGTCACT

>D8PAK:00062:00328
TAGCTAATTGTATGTTAAGACACA

>D8PAK:00062:00344
TTCTTCTGTATCCTGGGATACAGT

>D8PAK:00063:00343
GGTAAAATTGTATGCTGTCTTACG

>D8PAK:00064:00301
ATTATCATTGTATCCCCAAGCACA

>D8PAK:00064:00325
TGATTTGTGGCCTAAGCCACACTT

>D8PAK:00064:00348
CGCTTCTTAGTATCATAGCATACA

>D8PAK:00065:00310
ATGTAATTCCCATTCACTATTTCA

>D8PAK:00065:00321
ATTAATAACTACGTGCTCTCATCA

>D8PAK:00065:00346
TTGTATGCTAAGCCACACTTATAG

>D8PAK:00066:00343
GTTCCGAATGTGCCGTACCATACA

>D8PAK:00067:00302
ATAGCTCTTGTAAGCTGGACTACA

>D8PAK:00067:00327
TATTGGATTGAGCCCCAGCCTACA

>D8PAK:00067:00333
GACTCGATTGTATTTCTCACTACA

>D8PAK:00068:00316
TGATATACTCCATCCAGACCTGCG

>D8PAK:00069:00315
TACGCGTTTGTATCATGTGCTACA

>D8PAK:00069:00333
TTGTAACTCAGGGCACAAATCATA

>D8PAK:00069:00336
CACAGCTTTGTAACTGAGCATACT

>D8PAK:00069:00347
TGCTACTTTGTATGGTAGGTCACA

>D8PAK:00071:00325
TTTAACTTTGTATCCGGTGTTACA

>D8PAK:00072:00301
TACAAAATTGTAGCTGGTGTCACA

>D8PAK:00072:00310
TTGTATGCTAGGTTACATCTTTCC

>D8PAK:00074:00317
CATAATCTGTATTCCAGGGCACAA

>D8PAK:00075:00310
TTGTATTCCATGTTACAGATCGTA

>D8PAK:00076:00314
CTGTGATCTGCGTCACATTTTTAA

>D8PAK:00078:00331
AAAGTACCTGTACTCTACACTACA

>D8PAK:00079:00333
CGATACATTGTAATACACCCTACA

>D8PAK:00079:00339
TTAAACATTGTAGTTCGTCTTACA

>D8PAK:00080:00300
CGCGTCATGCATCCAGTTTCGTGT

>D8PAK:00080:00318
TAAGCAATTGTCGTCTGTACTACA

>D8PAK:00080:00348
TGCAAGTTTGTGGGCTAGGTTACG

>D8PAK:00081:00309
TTCTTCATTGTATGCCAAGTCGCA

>D8PAK:00082:00309
CATAAGTGTAATCTATATTACAAC

>D8PAK:00082:00330
CATTTATCTGTATCCTAGCCTACA

>D8PAK:00082:00335
AGGCCAACTGTAGCTGGTATTACA

>D8PAK:00082:00336
CTTCAGATTGTAGGCTAGAACCAT

>D8PAK:00082:00348
TATTAAATTGTGACCTGTGACACA

>D8PAK:00083:00323
GGATTGTGCCCTGGAATACTTTTG

>D8PAK:00083:00347
ATGGCGATTGTATGCTGCAATGCA

>D8PAK:00084:00317
ATTTTATTCGTATTTCGAAACACA

>D8PAK:00085:00313
TACATTGTAAGCCAGATTACATTA

>D8PAK:00085:00315
TATGCATCTGTGACCTGCAATACA

>D8PAK:00085:00332
AAATCGTTTGTATGCCACACTACT

>D8PAK:00085:00335
GCTTAGATTGTGAATTGCAACACA

>D8PAK:00086:00317
TCCTGAATTGTATGCCCGACTACC

>D8PAK:00087:00322
GTCTGGAATGTGAACTAGCATACA

>D8PAK:00087:00342
AGGACGTTTGTACCCTGGACTACA

>D8PAK:00089:00302
AATTGTGTGCCCCAAGACACAAAC

>D8PAK:00089:00306
TTTAGTTTGTAACCTGTGACACAT

>D8PAK:00089:00313
ACTCTGATTGTATCCTTCAGTACA

>D8PAK:00089:00314
TCGCCAAATGTATTATGGAGTACA

>D8PAK:00090:00310
AAACCGTACGTATGCTGGGCTACA

>D8PAK:00090:00331
TATTACATTGTGCTCCCAGGCACA

>D8PAK:00090:00332
TAGTCAATTGTAGTCTGAGTGACA

>D8PAK:00090:00344
CCGTCTATGACATCCACTCTAGTC

>D8PAK:00091:00302
GCCACACTTGTATGCTATATTACA

>D8PAK:00091:00306
CTGTCAATTGTGCGATGGGATACA

>D8PAK:00091:00328
TCAGTAATGGTATGCCATCATACA

>D8PAK:00091:00340
TTGTATCCCAAACTACATACTTGT

>D8PAK:00092:00342
CTGCAGTTTGTGTTCTGCAATACA

>D8PAK:00093:00310
CTTTAAATTGTGACCCTAACTACA

>D8PAK:00093:00319
AATGCCTAAGTAGCCCAGGCCACA

>D8PAK:00093:00330
GACTAGACTGTGGGCCAGGTTCCA

>D8PAK:00094:00302
ATGTATCCCGGAATACAAAAGCAA

>D8PAK:00095:00316
GCTAGCTTTGTAGCAACGCATACA

>D8PAK:00095:00342
CTCTGGTCTGTACCCTACGCTACA

>D8PAK:00095:00344
ATCTCAATTGTACTCCAGGTCACT

>D8PAK:00096:00330
CCGACAATTGTATCGCACGTTACA

>D8PAK:00096:00346
ACATAAATTGTAGTGCAGACTACG

>D8PAK:00096:00349
TCGAAAATGTATCCGGCGCCACAT

>D8PAK:00097:00312
CGTAACATTGTATCAGGGATTACA

>D8PAK:00097:00316
TCAGAAAACGTATTGCGCGCCACA

>D8PAK:00097:00318
TTTTCGATTGTATCTTAGGCTACA

>D8PAK:00097:00337
CTTAAAATCGTGTCCGGTGCTACA

>D8PAK:00098:00306
TACCAATTGTGGCCCCCAATACAC

>D8PAK:00098:00326
CGATTAATTGTAGTTCCTGTTACA

>D8PAK:00098:00336
TGTAAATTTGTATCACAGAGCACG

>D8PAK:00098:00341
TTCGAGATAGTGACCCTAGTTACA

>D8PAK:00099:00307
TACATGAACGTGGTCCATAATACA

>D8PAK:00050:00368
TTGTATTGCACACCACAATCTTTT

>D8PAK:00050:00377
GCATTAATTGTATCTTAGCATACG

>D8PAK:00050:00382
CATCAATACGTATCGCAGCTTACA

>D8PAK:00050:00385
GTTTCTGTAGCCTATCATACATTC

>D8PAK:00050:00396
GACGATTATGTGGCTTGGCGTACA

>D8PAK:00051:00358
AGAATTCTATCATCCTCACCTGAC

>D8PAK:00051:00361
CTAGCCTCTCATCCGTCTGCCTTG

>D8PAK:00051:00375
CTTTAATTGTAGCCTGTGCTACAT

>D8PAK:00052:00372
ATACAAACCGTACGCTAGGCTACA

>D8PAK:00052:00375
GGCAAGAGTGACACAGACTACAAT

>D8PAK:00052:00381
TGCAGAACTGTGCTCTAAGTTACA

>D8PAK:00052:00395
ACTTTCATTGTAACCCGCCATACA

>D8PAK:00053:00376
GAAATTGTAACGTAACTTACAATG

>D8PAK:00054:00351
CTGTATTTCGGCATACAATCACTG

>D8PAK:00054:00370
TAGTATGCTAGGCCACTTTCTCAT

>D8PAK:00054:00389
ACCCCCATTGTGTCCGGGATTACA

>D8PAK:00054:00394
ATGCTGAATGTATTATGAGTTACA

>D8PAK:00055:00373
ATCCAATTTGTAAGCTAGGCTTAA

>D8PAK:00055:00384
TATGCAATTGTAATGCCGGACACT

>D8PAK:00056:00383
CGAGTGTCTGTATTCCATGCCACA

>D8PAK:00056:00387
ATTAATTTGTGGTCCAGCATACGT

>D8PAK:00056:00394
AATATTTCCGTATTCTACGCCACA

>D8PAK:00057:00382
TTATCTGTATTGTGCGATACAATC

>D8PAK:00057:00394
GGACTGTAACCTGGGACACATATG

>D8PAK:00058:00363
AAAAATCGTTCATCCGTTTAAACT

>D8PAK:00058:00377
AAAATTGTGGCCTATGCTACTCTA

>D8PAK:00058:00381
ATGTAATATGTGATCTGGCCTACA

>D8PAK:00058:00390
AGAAGCTTTGTATCTCGCGCCACA

>D8PAK:00058:00398
TACTCCATCGTGAGCCCCGATACA

>D8PAK:00058:00399
AAACTGATTGTAAGTTAGGTTACT

>D8PAK:00059:00358
GGGATAACTGTAACCTAACATACT

>D8PAK:00059:00383
CTTTTTTCCGTAGCTGGGAGCACA

>D8PAK:00061:00354
TGGCTAATTGTAGGTTATACTACA

>D8PAK:00061:00358
ATGCATAATGTATCCTGTAATACA

>D8PAK:00061:00368
TTACCGATTGTAGCCCAAGTCGCA

>D8PAK:00061:00370
ATTATTAACGTATCCCACGATACA

>D8PAK:00061:00380
ATAGCTAGGACATCCGGTAAGTGA

>D8PAK:00062:00383
CCAACTTCTCCATCCAGGATTTAG

>D8PAK:00063:00355
AAAACGAATGTAAGCCAGAGTACA

>D8PAK:00063:00385
GAATTAAATGTATGCCAGGTCACT

>D8PAK:00063:00389
AGTGTAGTTGTATGCCGAAATACA

>D8PAK:00063:00393
CCATAGACTGTGCCTTAGACCACA

>D8PAK:00063:00394
CTGTACATTGTGTTCCTAGACACA

>D8PAK:00064:00351
CAGTTAATTGTATTCTGTGGTACA

>D8PAK:00064:00353
CTGATAATTGTGGTATAGCTTACA

>D8PAK:00065:00389
ACAGACACTGTGCTTCAAGTTACA

>D8PAK:00066:00350
AAGTCGTCTGTGGCCGAGAATACA

>D8PAK:00066:00356
AATCGAAGTGTATTCTAGCCCACG

>D8PAK:00066:00389
GTTAAGATTGTAATCTCACATACA

>D8PAK:00067:00378
CCCGGAAACGTATCCCATGACACA

>D8PAK:00068:00396
TGGCTAATTGTAGGTTATACTACA

>D8PAK:00069:00372
GATACACATGTATTCCCAGACACA

>D8PAK:00069:00373
GCTTGAATTGTGTGGCATGATACA

>D8PAK:00070:00357
AAATGAAATGTATCCCCAGATACA

>D8PAK:00070:00380
AGTGTATTGTAGACTACATTTCCC

>D8PAK:00072:00353
TAAATAATTGTATCCCACACTCCA

>D8PAK:00072:00355
TTTGATTGTGTTCTATAACACATT

>D8PAK:00072:00356
CCCACAAATGTGACTTCGCTTACA

>D8PAK:00072:00363
ACAATTTTTGTATTACAGCATACA

>D8PAK:00072:00383
CTGATGATTGTAGTGCGGAGTACA

>D8PAK:00073:00371
TCGTCTGTTTGTATCCTATGTTAC

>D8PAK:00073:00375
CTTTTGTAGGCTGGAATACAGTCT

>D8PAK:00073:00384
AGTCCTCATCCTACAGCGGGGAGC

>D8PAK:00074:00356
GACTCGAATTGTATCCGGGAGTAC

>D8PAK:00074:00378
AACAGGATTGTGTTGCAAGATACA

>D8PAK:00074:00392
GCTTGAATAGTATTATAAGCTACA

>D8PAK:00075:00359
AAGTCGAATGTAATCTGACTTACA

>D8PAK:00075:00368
GAACTTTTGTAGTGCAGTGCACAT

>D8PAK:00077:00353
ACGCCAATTGTAACACGTCATACT

>D8PAK:00078:00361
CAATATATTGTATTCGCAGATACA

>D8PAK:00078:00364
GTCGAGATTGTTGCCTACAATACA

>D8PAK:00078:00371
AAATAATTTGTATCTTGCCCTACA

>D8PAK:00078:00399
ACCAAGTGTAGTACATCGTACAAT

>D8PAK:00079:00358
CAATTTATAGTATTCTCGCCTACA

>D8PAK:00079:00371
AATGGATTGTATCCTAGACTACAC

>D8PAK:00079:00386
TTTGGTAATGTGGCCCCGCATACA

>D8PAK:00081:00365
TTGTAACCTGGGTCACAAATTCAT

>D8PAK:00081:00372
GCAGAGTTTGTGTACCGGCTTACA

>D8PAK:00081:00374
CTGTAGCCCCGGCTACAAACAACT

>D8PAK:00081:00376
CTGCTGAATGTAATCCAAAATACA

>D8PAK:00081:00388
GAACTGTGTCCGAGGTTACAATCG

>D8PAK:00081:00389
TCACGCTGTGTATGCTACACCACA

>D8PAK:00082:00352
ACCTTATCTGTAACTTGGCCTACA

>D8PAK:00082:00361
ATGTGTTTCAGGATACAATTTAAC

>D8PAK:00082:00379
CGTTCAATTGTGTCCTGGAATGCA

>D8PAK:00082:00391
TTAGCAATTGTATGCCAGGTTACA

>D8PAK:00083:00362
TTGTAGCCTAGCGTACATTGATTC

>D8PAK:00083:00367
AGTCAGTTTGTCATCCAGGATACT

>D8PAK:00084:00367
ACAAATTGTATTACACCTTACTTA

>D8PAK:00085:00368
CGCATTAACGTATGCTAGCACACA

>D8PAK:00086:00387
TGATAGTTTGTATCCCAGATTACA

>D8PAK:00086:00398
ATCACAATGTATCGGTCGCCACTA

>D8PAK:00087:00351
CAGTTAAATGTGTTGAGCGCTACA

>D8PAK:00089:00352
TAGGGATATGTAGTGCATGTCACA

>D8PAK:00089:00382
TTCATGATTGTATGGTGAGCTACA

>D8PAK:00090:00385
TCTGATGTGACATCCTCTATTGGC

>D8PAK:00091:00360
CGCCGAATGTGACTCACGCTACAG

>D8PAK:00091:00374
GTGTTAACCGTATTCCCGCATACA

>D8PAK:00091:00386
AGGCAAAGTGTACGCGGCAATACA

>D8PAK:00093:00355
ATCCACTCTGTATCCCAAGATACA

>D8PAK:00093:00382
GCATCAATAGTATCCTCTAATACA

>D8PAK:00093:00391
GAATGATAGTAGCCTAGGGCACAC

>D8PAK:00093:00394
CACAAGTTTGTGCCCTGTGCTACG

>D8PAK:00093:00395
ACTGCTACTGTATTATACGCTACA

>D8PAK:00094:00358
ACAGAGATTGTATCTCGGCATACT

>D8PAK:00094:00365
TGTTCCTTTGTATTCAAGAATACA

>D8PAK:00094:00383
TTGTGCCCTGCAATACATTATAAG

>D8PAK:00095:00392
TTAGATTGTGGCTTCAACTACAAA

>D8PAK:00096:00355
TCCATAAATGTGATTTACAATACA

>D8PAK:00097:00378
ATTGACATTGTGCCCGGGAATACT

>D8PAK:00098:00377
TCTAATTGTAAGACGGGTTACACT

>D8PAK:00098:00379
AATTTTGTGGCCCAGGTTACTATT

>D8PAK:00099:00380
AGCGCATCTGTATGCCGGAATACA

>D8PAK:00050:00421
AATGCCTCTGTATGCTACGTTACA

>D8PAK:00050:00437
AACTTTGAGCATCCGATCACTTCA

>D8PAK:00050:00444
GATAAGAATGTATTGTGTATTACT

>D8PAK:00051:00404
CGTAAAAAGGTGCTATGCATTACA

>D8PAK:00051:00408
TGTCGAATTGTATGTTATGTTACA

>D8PAK:00051:00425
TCAACTGTATGAAGGCATACAATA

>D8PAK:00051:00441
GTAGATCGTAGTACACGCTACAAT

>D8PAK:00052:00440
CTGTATCACAGACTACAATGTCGA

>D8PAK:00053:00411
GGGGCGAAGGTAGCCTGGAGTACA

>D8PAK:00054:00437
TTTTAAAATTGTAATACGGAGTAC

>D8PAK:00054:00447
ATTTTCATTGTAGCGTGTAATACA

>D8PAK:00054:00449
GAACTTTTTGTAACCCAGGGCACA

>D8PAK:00055:00419
CTTAGAAAGAGTAGTCTACGCTAC

>D8PAK:00055:00431
CCACAGTTTGTGTCCTGGACTACA

>D8PAK:00055:00446
TTGTGCTCTGTACTACACTTCAAG

>D8PAK:00056:00414
ATGTATCCTAAGTCACAATTGCAT

>D8PAK:00057:00418
TTGTATTCCTCGACACATTCATAG

>D8PAK:00057:00432
GATTGAATTGTGTGTTATCCCACA

>D8PAK:00058:00416
GTTGAAATTGTAGGTTCCACCACA

>D8PAK:00059:00416
GGCATTGTGAGCCAGGTTACAATG

>D8PAK:00059:00449
TTGTAATCGGCACTACAATTTGGT

>D8PAK:00060:00406
TCTAAACTTGTAGCCCATAATACA

>D8PAK:00060:00430
GTCGGAACTGTAGGCACGCTCACA

>D8PAK:00060:00436
CGTGAAAAAGTAACGCGTACTACA

>D8PAK:00061:00414
GCCCAAACTGTATTCTGGATTAAT

>D8PAK:00062:00413
TTTTCAATTGTATACCAAGCCACA

>D8PAK:00062:00416
CTGTCATTTGTAGCCCACGCCACT

>D8PAK:00062:00434
ACCACAATCGTAATACCCGATACA

>D8PAK:00064:00409
ATTGTTATTGTGGCCCCAGATACA

>D8PAK:00064:00434
CAACAACTGTGACTCAGGATACAG

>D8PAK:00064:00442
TCCTTTACTGTAAGCTGGATCACA

>D8PAK:00065:00422
ATTTGATTTGTGTTGCGGATTACA

>D8PAK:00065:00423
TCACAGTCTGTAGTCTAGGGCACA

>D8PAK:00065:00431
TCTAATTGTGATCCTAAATACTAT

>D8PAK:00065:00440
ACATGGACTGTAGTTTAGCATACA

>D8PAK:00066:00410
CCCAAGATGTATGCCACGATACAC

>D8PAK:00066:00445
TGTCAGATTGTAGTATACGTTACT

>D8PAK:00067:00436
TCTTAATTTGTGATTTACGCCACA

>D8PAK:00068:00434
CACTTTGTAGTGTGGACTACAAAA

>D8PAK:00068:00444
CAAAACATTGTATCACCGGCTACG

>D8PAK:00069:00418
CCCTGAACAGTAACTAGGCATACA

>D8PAK:00070:00428
AGCAAGATTGTATTTCGGCGTACA

>D8PAK:00070:00432
GTGAACTTCGTAACCCAGGTTACA

>D8PAK:00070:00433
TATAACATTGTAGTGCATCTTACG

>D8PAK:00071:00427
ATTGTATCCCGGGATACATTTTTA

>D8PAK:00071:00432
TTACTGATCGTGATCTAGGCTACA

>D8PAK:00071:00439
GACTATTAGTGCCCTAGATTACAT

>D8PAK:00071:00448
GATAGCTTTGTGACTTGTGCTACA

>D8PAK:00072:00431
CCTCTGAATGTGTTCCACCTTACA

>D8PAK:00073:00419
TTGTGTCCCAGAACACATAATGAA

>D8PAK:00073:00430
TCTAGATTTGTAGTTCCCACCACA

>D8PAK:00073:00431
AAGGGGATTGTACGCCCTAATACA

>D8PAK:00073:00449
TTTGTAATTGTGAGCTTTCCTACA

>D8PAK:00074:00421
ATTTAGATTGTATTATAGACTACC

>D8PAK:00075:00413
CTAAAGTGTGCTCTATGCTACTAT

>D8PAK:00076:00419
ATTGTACTTCACGATACAATTGCG

>D8PAK:00076:00426
CCGAGAATTGTATTACTCCATACT

>D8PAK:00076:00433
AAGGGAACATCCGCTCAATCGGAG

>D8PAK:00076:00440
CGCGCGATTGTAATCCACACCTAT

>D8PAK:00076:00443
TTGATTGTAAGCGAGACCACAGTC

>D8PAK:00077:00412
AAACCCTTTGTATCGCAGCATACT

>D8PAK:00077:00420
AACTTTGTGTGCCAGGACACTATT

>D8PAK:00077:00423
TTGTGTCCTAGGCTACAGACAAAC

>D8PAK:00078:00417
TTGTAGCCTGGTACACATTTCCCT

>D8PAK:00078:00435
ACAACACTTGTATCCTAGGACACA

>D8PAK:00078:00443
ACGCAGATTGTACGTTGAAACACA

>D8PAK:00079:00412
TTCCAACGTTCATCCGTTATTTTG

>D8PAK:00079:00417
ACGAGAAGTGTGCCCTCGCTTACA

>D8PAK:00079:00418
AAACTAATTGTAACCTACAATACC

>D8PAK:00079:00431
GTTCAAAAAGTGTTCTATGCCACA

>D8PAK:00080:00420
ACATGGATTGTAGGATACGATACA

>D8PAK:00080:00431
TGGCCGTTTGTATTCCTTAATACA

>D8PAK:00081:00430
TTCTTGATTGTATTGTCGGACACA

>D8PAK:00082:00423
GTCTGAATTGTAATACCCATCACA

>D8PAK:00083:00447
ATTGTAATTCATCCTACAATTTGT

>D8PAK:00084:00447
TTGTAATCCGGGCTACAGTTTTAT

>D8PAK:00085:00409
ACTTTATTTGTAGCCCGTGTCACA

>D8PAK:00085:00419
CCCATAAATGTGAGCTACGCCACA

>D8PAK:00085:00427
ATCCAAATTGTGATCTACATTACA

>D8PAK:00085:00440
TTATGAATTGTGGTACCTAATACA

>D8PAK:00086:00408
AAAGCACCAACATCCCATAAAAAC

>D8PAK:00086:00431
CGACAGATTGTATCCCGTATTACG

>D8PAK:00086:00442
ATCCGATTTGTGGGCTACATTACT

>D8PAK:00087:00401
TTGTAGCCTGCATTACAATCACTG

>D8PAK:00087:00420
CCTGATAAAGTATTGTGGGCCACA

>D8PAK:00087:00440
ATGTATGTTAGATTACAATTGATA

>D8PAK:00088:00403
ACCGTGCCAACATCCTTCTTGTAA

>D8PAK:00088:00404
CTGTAGTCTTGACTACAATCGAAA

>D8PAK:00088:00425
TTACGGCTACCATCCGCGTATAAC

>D8PAK:00088:00445
TCGAGATTTGTAGCGGGGCTTACA

>D8PAK:00089:00440
AATTCGTGTGTGCCCTAGGTCACA

>D8PAK:00090:00414
TTACACTCTGTATTCTAGAATACT

>D8PAK:00090:00425
TCCTGGAATGTAACGCAGAACACT

>D8PAK:00091:00407
ATAGTGATTGTATGCAGCGCTACT

>D8PAK:00091:00411
CCTACAATTGTATTCCCAATCACT

>D8PAK:00091:00427
AACCGACATCCAGCACTGACACTA

>D8PAK:00091:00439
ACTGGATTGTGCTATGCATTACAA

>D8PAK:00091:00441
TTGTGGTCTAGATTACAGTCTTCC

>D8PAK:00092:00415
TTCTTCATTGTATGTTCGCTTACA

>D8PAK:00093:00406
AATATTTTGTATCCTAAACTACAC

>D8PAK:00093:00410
TTGTAGCCCGGACTACAGTTATAT

>D8PAK:00093:00414
CGGACTGCCTCATCCCATTAGTGT

>D8PAK:00093:00422
GCTAACATTGTATCACCACTCACA

>D8PAK:00093:00439
CGAATAATTGTGGTCTGAGATACA

>D8PAK:00094:00431
TGTTCAAAAGTAGCTTGTAATACA

>D8PAK:00095:00402
TTCATCTTTGTGGCTCAGAATACT

>D8PAK:00095:00409
TTTCAAATTGTATTCCCGGCTACC

>D8PAK:00096:00408
TAGGCAATTGTAAGATGGACTACG

>D8PAK:00096:00425
CTGTATTGCAGGATACAATTCCGC

>D8PAK:00096:00428
CCCAAGTTTGTATTCCAGGCTACA

>D8PAK:00097:00410
TACGTCGTACTGTATGTGAATACA

>D8PAK:00097:00447
CGCGAATTTGTATGCTAAGCGACA

>D8PAK:00098:00403
GACAACAGTGTGCTCTAGAGTACA

>D8PAK:00098:00425
TTGACGAATGTAACTTGGCATACC

>D8PAK:00098:00441
CTCGGAATTGTGTGTTACGCTACT

>D8PAK:00098:00446
ATAGCAATTGTGCCGTGGATTACT

>D8PAK:00099:00411
CTTCAAATTGTGTCCTGGTTCACA

>D8PAK:00099:00422
ACGGCATGGTCATCCTGCATTGGG

>D8PAK:00099:00433
AGTAATATTGTAGTCTGGCATACA

>D8PAK:00099:00440
TAATTGTGACCAGTAATACAATCA

>D8PAK:00050:00454
ATTAAATTTGTATTCTTCAATACT

>D8PAK:00050:00461
AGCATGCGCTCATCCTTTGCGGGG

>D8PAK:00050:00496
GAGTATTTTGTATTACAAGACACA

>D8PAK:00051:00455
TTGTATTCTAGCATACTTTATACC

>D8PAK:00051:00470
ATGTGAGCTGGAATACTATGCCTC

>D8PAK:00051:00486
TGGCGAACTGTAATACGACACACA

>D8PAK:00052:00468
TGACTTTGTAGCGCTGGTCACGGA

>D8PAK:00053:00454
GTGTATTCCTGCATACAGTCTACA

>D8PAK:00053:00482
CTGGCCATTGTATCCTAGCACACA

>D8PAK:00054:00457
TCTCGATTTGTATGTTACGGCACA

>D8PAK:00055:00460
TGGCCGAATGTGTCCTGCGCTACG

>D8PAK:00056:00452
GCTCAGAATGTGGCGCGCGACACA

>D8PAK:00056:00461
CTTATGATTGTGGTTTGCGATACA

>D8PAK:00056:00474
ATTTGAATCGTAGTCCGGCATACA

>D8PAK:00056:00489
CGTTCGATTGTAGTCCCGGTCACA

>D8PAK:00057:00461
GTGTATCCTGGACCACATTGGGGA

>D8PAK:00057:00475
CAACGGATGGTATGCCATAATACA

>D8PAK:00057:00476
TAATAGAATGTACGGTATGATACA

>D8PAK:00057:00484
ATTCCATTTGTATGCTAGACTACA

>D8PAK:00057:00485
CAAGTATTTGTGATCCAAGATACA

>D8PAK:00057:00499
AGTAATTGTAGGCTCGAATACACC

>D8PAK:00058:00452
CATAAAATTGTGTGCCTGCATACA

>D8PAK:00059:00467
TAAGATTGTATTGCAGGCCACCGC

>D8PAK:00060:00466
ACTCCGAATGTAAGCTACAATACT

>D8PAK:00060:00480
AAAATTCTTTCATCCGACCTTTAA

>D8PAK:00060:00494
GACCACATTGTAACCTGTGCTACT

>D8PAK:00060:00497
CTGCGATCCACATCCGCCAGGCTA

>D8PAK:00061:00463
TATACGAATGTATCCCCGGACACG

>D8PAK:00061:00464
TTTAACTTTGTAACCAAGAGTACA

>D8PAK:00061:00492
CATAGATTGTAGCCCTGACTACAA

>D8PAK:00062:00450
CGGAAAAGTAGCGTATAATACATA

>D8PAK:00062:00457
TATCGGATTGTGTCGTGCGTGACA

>D8PAK:00062:00465
TTGTATCCTACCTCACATTGTTGC

>D8PAK:00062:00479
CTTAAATAAGTAACATAGAATACA

>D8PAK:00062:00487
TTTGAACTCGTGGCGTGCACTACA

>D8PAK:00064:00455
TTTTGAATTGTAAGCCAGTGCACA

>D8PAK:00064:00474
TTTACAAACGTAATCCACAGTACT

>D8PAK:00064:00475
TGAAGGACTGTGTTGTGCGTTACA

>D8PAK:00065:00479
GTCAGAATTGTAATCTAAGCCACT

>D8PAK:00065:00483
TTAGAAACTGTAGTCCAGCATCCA

>D8PAK:00065:00495
AAATACCTGTATCCCAAGCTACAA

>D8PAK:00065:00498
TACCTCATTGTATTCCACAGTACA

>D8PAK:00066:00459
GGGAAGACTGTAGCTTGTGCCACA

>D8PAK:00066:00485
CTCCCTATAGTAATCTGCGCTACA

>D8PAK:00067:00484
GTTTGTTTTGTAATCAGTGATACA

>D8PAK:00068:00452
CATTGGAAGTGTATCGTGTGCTAC

>D8PAK:00068:00495
GCGTCCTTAGTAACCTGCAATACA

>D8PAK:00069:00452
AAAATTGTAATCTGCGCTACCATA

>D8PAK:00069:00470
TTTGAGAAGTGTGTCCAGTCATAC

>D8PAK:00069:00499
ACATAATATGTATGTTAGATCACA

>D8PAK:00071:00469
TTAGTAATAGTGCTCTGTAATACA

>D8PAK:00071:00483
TTGGGAACAGTATGATACACTACA

>D8PAK:00072:00476
CTTGTGATGACATCCGTATTATTT

>D8PAK:00073:00454
GAGTCGAGTGTACTCTAGGCCACT

>D8PAK:00073:00492
GTGTAGCCCAGCGTACAATTGAGG

>D8PAK:00074:00464
CCAATTGTATCCTGGTGCACACTT

>D8PAK:00074:00471
ATACATATTGTATCGTGGAATACA

>D8PAK:00074:00485
GCATGTATTGTGTTCTAGGCCACT

>D8PAK:00074:00486
CTTAGGCTTGTATTTTAGGCTACA

>D8PAK:00074:00491
TAGGATATTGTATGCTAGGTCACT

>D8PAK:00074:00496
AATACAATTGTAGGTCACAATACA

>D8PAK:00074:00498
TTGTATCCTCAAATACAAATGAAT

>D8PAK:00075:00482
TTGTATTCCAGCACACAATCGGAC

>D8PAK:00075:00487
ATCCCAATTGTGCCCTCGAACACA

>D8PAK:00075:00498
TAGAATCGTGTCCCCGAATACAAT

>D8PAK:00077:00469
TTGTAGCCTACCTTACAATAGCTG

>D8PAK:00077:00474
ATGATTGTGTCCCCGGCTACCTTT

>D8PAK:00077:00479
ATCAAGATTGTCGACCAGACTACA

>D8PAK:00077:00488
TTTTATATAGTGATCTGCAATACA

>D8PAK:00077:00496
ACGTAAAATGTGGCCCAAGACACG

>D8PAK:00078:00484
ACATAAATTGTAATCTGAGACACA

>D8PAK:00079:00456
CGTCGACTTGTAGCCGTGAATACA

>D8PAK:00079:00490
AAACAAATTGTGGCCTCGAATACT

>D8PAK:00079:00493
TATTCGATTGTATTGTGTAATACG

>D8PAK:00079:00498
CGTATTCCCGCATCCGGTTTTTGA

>D8PAK:00080:00451
AGAGTGTATCCTAGACTACAATTA

>D8PAK:00080:00459
ATTTAAACTGTGAGCGCGGTTACA

>D8PAK:00080:00469
TTCACTATTGTATCCGGCGTCACA

>D8PAK:00080:00489
ACCGAGTGTAGCCCATGCTACATT

>D8PAK:00080:00492
TTGTGGCCTGGCATACAGTTCGCC

>D8PAK:00080:00496
CGTTTAATTGTATTACAAAGTACT

>D8PAK:00081:00457
TGTGCGAATTGTAAGCCCCAGTAC

>D8PAK:00081:00483
TCACTACCTGTATTCCCGCTTACA

>D8PAK:00082:00451
TTTTGCTTTGTAACTGACACTACA

>D8PAK:00082:00465
CATATTATTGTATCTTGTATTACA

>D8PAK:00082:00497
ACACTGTAGTCTAGCATACATTCT

>D8PAK:00082:00499
CTTTAATCTGTATGCCGCGTTACA

>D8PAK:00083:00454
TCCCAATTGTATGCTACAACACTA

>D8PAK:00083:00461
GACAAATTTGTAAGCGAAGACACA

>D8PAK:00083:00474
CGGGAAATTGTGGCCTCCAACACA

>D8PAK:00083:00491
TTTTGAATAGTATCCCAACGTACA

>D8PAK:00084:00483
TTGTATTATAGATTACACTGTTTT

>D8PAK:00085:00454
TTTCCTATTGTAGTCCATGACACA

>D8PAK:00085:00457
TAAATTAATGTATCCCGCCGTACA

>D8PAK:00086:00481
CTAAAAACTGTGTCATAGGCCACA

>D8PAK:00087:00461
CCCTACGCACCATCCAGAACCAAT

>D8PAK:00087:00480
TTTCAAACTGTCACCCAAGCTACA

>D8PAK:00088:00451
ATTGAATTGTATATCAGAATACAT

>D8PAK:00088:00463
CCAGGATACGTATTCCACGATACA

>D8PAK:00088:00470
CAATAATAAACATCCTGTACTTGG

>D8PAK:00089:00496
ATCTTAATTGTGACCCCTACTACA

>D8PAK:00090:00456
ACATTCTTTGTGTGCTGGCCCACA

>D8PAK:00090:00473
TTGTGACTGTATTACAGGTTACAG

>D8PAK:00090:00480
AGGTTGTTTGTACTCTAACATACA

>D8PAK:00092:00452
CCCTGAATGTAGTTTGGACTACAT

>D8PAK:00092:00459
AATCCGAAATGTAGTGGGCCCCAC

>D8PAK:00092:00477
TTGTATTCTACCTCACACTTGATA

>D8PAK:00092:00498
GGCAAAATTGTGCAGTACGCTACA

>D8PAK:00093:00488
CAAAAATGTGCCCTCTAATACAAA

>D8PAK:00094:00454
GAGAACAATGTATCCCACATTACA

>D8PAK:00094:00468
ACCAATGACCATCCGGTGCTAACG

>D8PAK:00094:00487
CGCTGATCTGTAACCTGTGATACA

>D8PAK:00094:00496
ATTGAATTTGTGACTGGAATTACA

>D8PAK:00095:00462
AAATTATACGTATTCTACACTACA

>D8PAK:00095:00494
GAATACTTTGTATGATGAATTACA

>D8PAK:00095:00499
TTTATATTGTAGCCCCCGATACAC

>D8PAK:00096:00467
GTGTAGGCTAGGCCACATTCCGAC

>D8PAK:00097:00455
AACGCCATTGTAGCCCATGCTACA

>D8PAK:00097:00496
GTTTCGTTTGTAGCGTATGTTACA

>D8PAK:00097:00498
AATAATTTTGTGTGCCTTACTACA

>D8PAK:00099:00467
TTGTAGCCGTGAATACATTGTCTA

>D8PAK:00099:00475
TTGTACGCTGGATTACACTCTACC

>D8PAK:00099:00499
CACCCCATTGTGGTCTGGCCTACA

>D8PAK:00050:00523
TTCTAATTGTGACCCCGACCACTT

>D8PAK:00050:00541
TTTTGAAAGTGTGATCTAGACTAC

>D8PAK:00051:00534
CTATTCTTTGTATGCTGTAACACG

>D8PAK:00051:00543
AACATAGCTTCATCCATAAGTTAA

>D8PAK:00052:00510
ACTGCGATAGTATCACGTAATACA

>D8PAK:00054:00518
TACTTCTTTGTAGCCTGTGATACT

>D8PAK:00055:00504
CCCCCCATTGTAGTCCACGTTACT

>D8PAK:00055:00520
CCCCAATTGTACTCTGTAATACTC

>D8PAK:00055:00537
TAGTATGCTAGGCTACACATTCAC

>D8PAK:00056:00516
TCGGGGATTGTATGTCCGCATACT

>D8PAK:00056:00523
ATGTATGCCTGGATACATTTTGAC

>D8PAK:00058:00501
ATTTGAAACGTAGCGTACGCTACT

>D8PAK:00058:00516
CAGGGGGCTTCATCCAGCTTACAA

>D8PAK:00058:00531
TCCCTTAGCGTATTCTGGACTACA

>D8PAK:00058:00533
TTGTATCCCAGATTACCTTTTAGC

>D8PAK:00059:00521
TTTAAATTAGTGGTCTTGAATACA

>D8PAK:00059:00539
AGTGCGATTGTGTCTTGGGTTACT

>D8PAK:00059:00543
GAGCCAATTGTATGCGGTCATACT

>D8PAK:00059:00547
TGTTGATTGTAAGTTGGCTTACAA

>D8PAK:00060:00504
TTCCACATTGTAGTGTAGACTACC

>D8PAK:00061:00508
GTGCCGATTGTAAGCCAAATTACA

>D8PAK:00061:00518
CCCCTGAATGTATTGGAGGCTACA

>D8PAK:00061:00537
GACAGAAACGTATCCCAGAACACA

>D8PAK:00062:00538
TCCAAAATTGTGGTTTGGACCACT

>D8PAK:00063:00510
GCCGCAATTGTAGGGCTCATTACA

>D8PAK:00063:00549
CTTACAGATTGTATCACGCGACAC

>D8PAK:00064:00529
ATGTATTCTACGATACATTTGTGT

>D8PAK:00064:00532
ACACCCTATGTATTCCAGGTCACT

>D8PAK:00065:00519
AGTTATAATGTGACATGGGATACT

>D8PAK:00065:00529
ACCATACTGTGTCCCACCTTACAC

>D8PAK:00065:00533
CTGTGGAGTGTAATCAGGAATACA

>D8PAK:00065:00543
TATCTGAAATGTACCCTGGCTTAC

>D8PAK:00066:00510
AACATTGTGACCTACGGTACACTT

>D8PAK:00066:00528
AATTTTGTGGTTCAGGACACATTC

>D8PAK:00066:00543
TTAGCCATTGTAATGCGGCATACA

>D8PAK:00066:00546
AAATCGAATGTAAGCTGGATTACA

>D8PAK:00067:00501
TGTAACTTTGTAATCTACTGCACA

>D8PAK:00067:00523
CACGTACTTGTATGCCAACATACA

>D8PAK:00067:00527
TTCAGAATCGTATGCTAGGCCACC

>D8PAK:00067:00534
GCATAGAATGTACTCAGGCCCACA

>D8PAK:00067:00541
AAACTAAATGTATTCCAGGTCACC

>D8PAK:00068:00526
TTGTATTCTGGATCACAGTTTAAT

>D8PAK:00068:00540
TCGGTGTTTGTATGACAGATTACA

>D8PAK:00069:00506
GACCGGATTGTGCATTGCACTACA

>D8PAK:00069:00521
AAATGTATGCATCCTTCTGTTTCG

>D8PAK:00069:00533
TTGTGCTCCAAGATACAATTAAGA

>D8PAK:00069:00539
ATTAATAGTGTGCCCTACCCCACA

>D8PAK:00069:00543
AGGAAGATTGTATGATGGAACACT

>D8PAK:00070:00537
AACAAGATTGTCTGATAGGTCACA

>D8PAK:00071:00513
AAGATTTGTGTGCCGGAATACATT

>D8PAK:00071:00532
CTACTTTCTGTAGCGTAGAATACA

>D8PAK:00072:00541
GCGCAGATTGTATTCCACCGTACA

>D8PAK:00072:00547
TTGTAGGCTGGGTTACAATCGTTA

>D8PAK:00073:00506
ACTCACAGTGTGCTTCCGACTACA

>D8PAK:00073:00531
TTGTAACCTGGGATACTGTTTGAC

>D8PAK:00073:00544
TTGTATTCGAGACTACAGATTTCT

>D8PAK:00074:00512
CTGCAGACTGTATTCTAGACTCAT

>D8PAK:00074:00538
ATCAATTGTGATCGGGGTTACCAA

>D8PAK:00074:00542
TCGAATGTATGCTTGGCCACAATT

>D8PAK:00075:00500
TTGTATTCCTGTGCACAATCGTCC

>D8PAK:00075:00516
AGCTATGCACCATCCAATGTACGT

>D8PAK:00075:00529
AATTGCCATCCAGTTTTTCTGACT

>D8PAK:00076:00517
AAGTACATTGTGTTCTACTTCACA

>D8PAK:00076:00530
TGTTACATTGTATGACCGGATACA

>D8PAK:00076:00549
TTTAACGTGCATCCACCGAACCCT

>D8PAK:00077:00507
CATCAGACTGTAAGCTACCTTACA

>D8PAK:00077:00520
ATCCAGATTGTAGTGGGGGTTACA

>D8PAK:00077:00530
TGTGGCCTGGGCCACAATTTTCCT

>D8PAK:00077:00532
AACAAATTGTATTTCCCGATACAC

>D8PAK:00077:00536
GATTAGAACGTACTCTAGCCTACA

>D8PAK:00078:00517
ACACCGAATGTGTGCTGGCCTACT

>D8PAK:00078:00521
AATGTTCAACCATCCATTGCCAAT

>D8PAK:00078:00524
TTGTAAGCTATCTTACAATTTTCT

>D8PAK:00079:00541
TTGTATCCCAGGATACAAGTGCTT

>D8PAK:00080:00510
ATGTATCACGGGCTACATTTTCCG

>D8PAK:00081:00522
TATGAATTGTGTCGCACGTTACAT

>D8PAK:00081:00526
ATATTGTATCCCTGAATACAATGT

>D8PAK:00082:00534
TGGCAAACTGTAGGCTGGAGCACT

>D8PAK:00082:00536
AACATCGTATCATGCGATACACAT

>D8PAK:00083:00507
CGATAGATTGTAACTAGCAATACA

>D8PAK:00083:00517
GAATTTTCTGTAGCTGCGCATACA

>D8PAK:00084:00542
TTCACGATTGTAGCTCAGATTACC

>D8PAK:00085:00516
CAATAGAATGTAGTCCGAGTTACA

>D8PAK:00087:00538
CACTAAATTGTGACCCTCGCTACT

>D8PAK:00087:00540
TTGTACGCTGGCACACATTTGTGC

>D8PAK:00087:00549
ATGTAAATGTGTTCCACGCTACAA

>D8PAK:00088:00511
TCGCAGCTTCATCCCTGCGGTTTG

>D8PAK:00088:00547
CTTTCCTTTGTATTCCGGGCTACC

>D8PAK:00088:00549
AATTCGATTGTGTCCCCGGCTACT

>D8PAK:00089:00501
ACAGAGAATGTACGCTACGGCACA

>D8PAK:00089:00510
GTGAAAATCGTGCTCTGGATTACA

>D8PAK:00089:00545
GATGAGACTGTGGTCCAGATCACC

>D8PAK:00090:00524
ACATACATTGTAGCCTGTCACACT

>D8PAK:00092:00532
AATAATTTTGTGAAGTGGAATACA

>D8PAK:00093:00502
TCTTTAATTGTATGCACGACCACA

>D8PAK:00093:00513
CTTATCTTTGTGACCGAGACTACA

>D8PAK:00093:00529
TCTGCAATTGTAACCCGCAACACA

>D8PAK:00093:00540
TATCTAATTGTACTATAGGAGACA

>D8PAK:00094:00514
TTGTATTCTTGCACACATTCTGCG

>D8PAK:00095:00508
TTGTAATCCCAGCTACAATCTGCA

>D8PAK:00095:00530
TCGCACTTAGTAACTTAGGATACA

>D8PAK:00095:00539
ATGTAGTCTACAGCACATTTGGGA

>D8PAK:00096:00503
ACTAGGAAAGTAACCAGCGATACA

>D8PAK:00096:00517
TTGTACTGTGGGATACAATATGGA

>D8PAK:00097:00512
TAATTAATTGTATCACACGTTACA

>D8PAK:00097:00524
CCTATAATTGTATGCTACGATACA

>D8PAK:00097:00525
TGATTGTATTCCAGGTCACAGTCA

>D8PAK:00097:00533
TTGTATGCCTCAACACAATGTTTG

>D8PAK:00097:00547
TTTGACTTTGTATCCGGAGGCACT

>D8PAK:00098:00503
GAGAGATTGTATCGTAGATTACAT

>D8PAK:00099:00530
GATTAGACTGTAATCCTGAGTACA

>D8PAK:00099:00548
CGTTAAATTGTGATACCAGTTACA

>D8PAK:00050:00557
TTGTATCCGCTACTACAATGTGTA

>D8PAK:00050:00583
CTGGCATTGTATTCTGCACCACAT

>D8PAK:00050:00586
ATAGTATCTTGCTATCGTGACCAC

>D8PAK:00050:00593
TAAACTGTATGCTTGACTACTATT

>D8PAK:00051:00553
ACTCAATAGTGGTCTGTATTACAA

>D8PAK:00051:00573
AGACAGATTGTATGTCCGAATACA

>D8PAK:00051:00589
TTGTGCTCAGTAATACAGTTCAGG

>D8PAK:00053:00557
TATGACTTTGTGTCCCGTAATACA

>D8PAK:00054:00571
CTAAAAACTGTAAGATGCGCTACT

>D8PAK:00055:00562
TTTGTAAAAGTATCCGGGATTACA

>D8PAK:00055:00579
AAATATGTGTTGTAGGCTACAGTG

>D8PAK:00055:00584
TGCGTAATTGTATGCCACGTGACA

>D8PAK:00055:00588
AATTAAATTGTAACCCGTGCCACA

>D8PAK:00055:00595
TCTGTGATAGTATCCCGGCTTACA

>D8PAK:00056:00552
CTAAATTCTGTATCCCACAGTACA

>D8PAK:00056:00561
GTGTAGTCTCGGATACAATTCAGA

>D8PAK:00056:00596
TTCTTGTTTGTATGCCTTCATACA

>D8PAK:00057:00573
TTAAATAGTATTGTGGGCTACAAT

>D8PAK:00057:00593
TTGTATGTTAGGCTACAAAATCAG

>D8PAK:00059:00560
ATCAACATCCGCCATACTTTACAG

>D8PAK:00059:00578
GAACGATTGTAATCCCTCATACAT

>D8PAK:00059:00593
GAAATTGTATTCCAACCTACAATT

>D8PAK:00060:00581
CTTTCTATTGTACCCTAGGCTACA

>D8PAK:00061:00566
AATCAAATTGTAGTCCCCATCACA

>D8PAK:00062:00568
ATGTCATTTGTAAGGTGCATCACA

>D8PAK:00063:00557
GGGCATATTGTATTGTCAGCTACA

>D8PAK:00063:00567
ACTTACATTGTATGGTAGATTACA

>D8PAK:00063:00570
AAGTACATTGTAACCTAAAGCACT

>D8PAK:00063:00576
TTGTGACCTATATTACATTCCGTA

>D8PAK:00064:00563
TAATGGAATGTAATACCGATTACA

>D8PAK:00065:00557
CTTATAAATGTGAGCCCCGCCACA

>D8PAK:00065:00559
TTGTAAATCGTGTCCTAGGCTACT

>D8PAK:00065:00575
ATGTTAAGTGTACTCGCGCATACT

>D8PAK:00065:00579
AAAAAATTTGTAGCATCCCTTACA

>D8PAK:00065:00598
TTGTGCCCCAGAACACATATTCGC

>D8PAK:00066:00560
CTCTACACTGTGATCCCTATTACA

>D8PAK:00066:00576
ACTATGTGGCGCATCCTACACTTT

>D8PAK:00066:00592
ATCTAGTTTGTGCTCCGTACTACA

>D8PAK:00068:00550
CCCCGCTTTGTAACCCGGAGTACA

>D8PAK:00068:00551
CCTAGAACTGTGCTCCGTAATACG

>D8PAK:00068:00561
CTTAGTTTGTAATCTGGAACACAA

>D8PAK:00068:00576
GTGATAATTGTAGTTAGGGGTACA

>D8PAK:00068:00585
CTACCGATTGTGCTCTCCAATACA

>D8PAK:00069:00555
CTCTACATTGTGTCTCCTATTACA

>D8PAK:00069:00566
AAGAAGTTTGTAGCCCCAATGACA

>D8PAK:00070:00553
TTTCAGACTGTAAGCCCTACTACA

>D8PAK:00071:00561
TCGCAAGTGTGCCCTACGCCACAG

>D8PAK:00071:00593
ATTTACATTGTGTGCTCAGGTACA

>D8PAK:00072:00556
CTTCTAAATGTACTCTACGCTACA

>D8PAK:00072:00563
ACTTAATTGTGCCTGGGGTTACAA

>D8PAK:00072:00587
TAAGTGTATTCTACCATACAATCT

>D8PAK:00073:00595
CATAAATCTGTGTCCCCTGCTACA

>D8PAK:00073:00597
ATGTATTCCAGGATACAAATGTAC

>D8PAK:00074:00559
AATGCAATAGTACTCCACAATACA

>D8PAK:00075:00561
TTATGATTGTATTGTACCCTACAG

>D8PAK:00075:00575
ATCTAGATTGTATTCCAGTGCACA

>D8PAK:00075:00582
TTGGAATTTGTATCGTAGCATACC

>D8PAK:00076:00555
GTCTAACTGTAGTACGCACTACAT

>D8PAK:00076:00574
TTGTAGCCAGGATTACATTCTTTA

>D8PAK:00077:00598
TAAACTTTGTGATCTAGGCTACGA

>D8PAK:00078:00565
AAACAAATTGTATGCTATGTCACA

>D8PAK:00078:00589
TGTAATCTAGCATACAATCCATGA

>D8PAK:00078:00592
CATAAAATTGCATTTCGGCATACA

>D8PAK:00079:00557
TTCCTAAATGTGCGTTGTAATACA

>D8PAK:00079:00565
CTCTGTATTGTGGGGTGTGATACA

>D8PAK:00079:00593
TGATAAATTGTGGCCCGGCTCACT

>D8PAK:00080:00563
TATCCCACTGTGACATGGGATACA

>D8PAK:00080:00565
TGCAAATGTGTTGTGCGCCACACA

>D8PAK:00080:00566
TATTTGAATTGTATGGTGCCCCAC

>D8PAK:00080:00598
TAATTTGTGATCCAGCTCACAATA

>D8PAK:00081:00561
TTTAAGAAAGTGTCTTGTGATACA

>D8PAK:00082:00553
TAGCGCTTCGTATGACAGGCTACA

>D8PAK:00082:00558
TTCTCGATTGTAGGCGTGAGTACA

>D8PAK:00082:00577
GCTACAATAGTATTGGGCACCACA

>D8PAK:00083:00559
GCCTCGAACGTATTTCAAGCTACA

>D8PAK:00083:00592
TTCTTGAGTGTGTTCCGGGCCACA

>D8PAK:00083:00594
TTTGCCAGTGTATGCGGAACTACA

>D8PAK:00084:00577
TTCCATTTTGTATGCAGGCATACA

>D8PAK:00084:00588
GAAGCGTTTGTAACCTAACATACA

>D8PAK:00085:00595
AAAAGTATTGTAGCCGCGCATACA

>D8PAK:00086:00551
TAATAAATTGTAGCCTCCCATACA

>D8PAK:00086:00572
CACCACAATGTATTATAGACTACT

>D8PAK:00086:00589
ATCTAGACTGTGGCTTGGGCGACA

>D8PAK:00086:00593
CCCCATACCCCATCCAGTATCTGA

>D8PAK:00087:00559
CGCAATCGTGGTCCACGACACATT

>D8PAK:00087:00565
ACCCATAACTCATCCTTCTTAATG

>D8PAK:00087:00590
GGGGGCATTGTATCATACAATACA

>D8PAK:00087:00592
TCACGAATTGTATCGGGTGTTACA

>D8PAK:00088:00550
AACTAGATTGTGCTCCATAGCACA

>D8PAK:00088:00571
GCGTAATATGTGAGCCGGGCTACA

>D8PAK:00088:00586
TTGCCTAGCTCATCCTTCACACCT

>D8PAK:00089:00582
TTGTGTTCTGGAACACAATTGTTA

>D8PAK:00091:00558
GATAGCTTTGTGACTTGTGCTACA

>D8PAK:00091:00573
TGTATTATACGCTACAATTTTACG

>D8PAK:00092:00574
ATCAATAATGTGTTCTAACATACA

>D8PAK:00092:00579
TAATAAATTGTATTTTAGAATACA

>D8PAK:00092:00589
CCGTGATTTGTGCTCCCGATTACA

>D8PAK:00093:00581
TACGCATTGTAGTGTACAATACAC

>D8PAK:00094:00558
ATTCCGAATGTGTCCCCGGTCACA

>D8PAK:00094:00567
TGTCTGTTTGTGTCGTAGGCCACA

>D8PAK:00094:00595
CCACAGAATGTGACCTGCACTACT

>D8PAK:00095:00555
CTAGTAATGTATGCTGCGCTACAC

>D8PAK:00096:00579
GGCTTGATTGTACCATACATTACA

>D8PAK:00097:00550
CACCATATTCCATCCTATAGTCGC

>D8PAK:00097:00571
TTTGCAATTGTATACTGTATTACA

>D8PAK:00098:00583
AATATCACTGTATGCTAAGCTACT

>D8PAK:00098:00590
CCATGGACTGTGCCCCGGGATACA

>D8PAK:00099:00554
ACCAAAATGTATGCCATGATACAC

>D8PAK:00099:00557
TTACTGATTGTAGCCGGTATTACT

>D8PAK:00050:00602
GATAAAATGTAAGCTGTGATACAT

>D8PAK:00051:00622
GGCTATTCATCATCCCCTTGCTAG

>D8PAK:00052:00602
CTGAGGATTGTGGCATGTATTACA

>D8PAK:00052:00635
TTTTTTTTGTGACTTGAACCACAT

>D8PAK:00052:00636
TTGTGATGCTGCTTACAATTGTAC

>D8PAK:00053:00601
CTTTCAATTGTATTGTGCCCCACT

>D8PAK:00053:00612
TTTTCCATTGTGTCCTACGTTACA

>D8PAK:00053:00621
TACCTGATTGTACTCAGGACTACT

>D8PAK:00054:00600
GTATGAATTGTCGTCCCGACCACA

>D8PAK:00054:00627
CTTCAAATAGCATCCTCTATCTCA

>D8PAK:00054:00635
ATAGGCTTTGTGTTCCAGAATACA

>D8PAK:00054:00648
AGCCCAATTGTGCCCACGCGTACA

>D8PAK:00054:00649
ATGTGTCCTAGCATACAAGTTCCT

>D8PAK:00055:00611
TCAAGGATTGTATCCGAGACTACT

>D8PAK:00055:00623
TTGTAGTCTGGAATACAATCGTCC

>D8PAK:00055:00631
CATCGATTGTATCTGCCGATACGA

>D8PAK:00056:00611
TACGTATTGCACATACAATTCGCA

>D8PAK:00056:00625
AAAAAAATTATAACGCAGGATACA

>D8PAK:00056:00638
AAAGAGAAAGTATTCCATGTTACA

>D8PAK:00056:00648
TTGTGCCCCAGAATACAATCCGAT

>D8PAK:00057:00601
AATCGGTTTGTAGCCTCCAATACA

>D8PAK:00057:00609
TTGTAATGCAGATCACAATGCATA

>D8PAK:00057:00634
TTTCGGAATGTGTTCCAGCTTACT

>D8PAK:00057:00643
TTTTAGTTTGTGTTCCAGGCTACT

>D8PAK:00058:00618
TTTAAACTTGTAGCATGGACTACG

>D8PAK:00058:00638
CTCGTGATTGTACGCCTGCACACA

>D8PAK:00058:00648
GCATTGAATGTATCCGGTGTTACA

>D8PAK:00060:00634
TTCAAGATTGTATTACTCGGTACA

>D8PAK:00061:00610
ACACAATTGTAGTTTCGGATACAA

>D8PAK:00061:00628
GGTTATTGTAACATAGAATACATG

>D8PAK:00062:00610
TTCCAAACAGTGTCCTACCCCACA

>D8PAK:00062:00618
AAACGAACTGTAACCTTGGATACA

>D8PAK:00062:00623
AATGAGTGTGTCGCAGATTACAAT

>D8PAK:00062:00635
TTACAATTGTATTGTGAGCCACAC

>D8PAK:00063:00612
ACCACGACTGTATCCGTCGCCACA

>D8PAK:00064:00619
GGTTGACGTGTGACCTGGCTTACA

>D8PAK:00064:00621
TTGGAAGTGTATCCTGGCCCACAC

>D8PAK:00064:00632
TGATAAATTGTATCCCAGGTCCCA

>D8PAK:00064:00649
TGTGGGACAGTATCTTGGGATACA

>D8PAK:00065:00637
GGCCCTGATTGTACCCCTGGTTAC

>D8PAK:00066:00605
ACGAGAATTGTAACCTCAATCACT

>D8PAK:00066:00621
TTCCTGATTGTAATGTGCGATACT

>D8PAK:00066:00643
CTCTAGAACTGTGTCGTAGCCCAC

>D8PAK:00067:00610
CTGTAGCCTACAATACATATTAGT

>D8PAK:00067:00616
CATCCAACTGTAACGTAGACCACT

>D8PAK:00067:00632
TTGTAAGCTGTATTCCAGGGTACA

>D8PAK:00067:00638
GCGTAAATTGTGGTCCACAATACA

>D8PAK:00067:00648
CGGCCAATAGTATTCCCAGTTACA

>D8PAK:00069:00632
TAGCAGATTGTGTGCCTGACTACG

>D8PAK:00069:00643
GACCAGAAAGTGCGCCTGCATACA

>D8PAK:00069:00645
AGGTACATTGTATTCTGTCTTACA

>D8PAK:00070:00604
CATTCAATCGTACGCCAGCATACA

>D8PAK:00070:00641
TTCCTTGCTGCATCCTCTCTAATG

>D8PAK:00071:00617
CATCAAATCGTAGTCGGCGCTACA

>D8PAK:00071:00638
AAAATTGTAGGTTGGAATACATGG

>D8PAK:00072:00604
CTTCACATTGTGTGATAGCTCACA

>D8PAK:00072:00622
CGCAATTGTAGCGGAGCATACATG

>D8PAK:00072:00623
CAGATTGTGTCCCAGCCTACGATG

>D8PAK:00073:00624
CGATTGTAGTCCAGCTTACTAAGT

>D8PAK:00073:00626
TTGTATCCTGGACTACATTATTTA

>D8PAK:00074:00604
TCCCCATTTGTACTGTATACCACA

>D8PAK:00074:00640
CCTGAAATCGTATTCTATGTTACA

>D8PAK:00075:00614
CCTTCGATTGTATGATAAGATACA

>D8PAK:00075:00637
GTCGATTGTATGATGGGCCACGAA

>D8PAK:00076:00600
GCGTTTAATGTATCGTAGGACACA

>D8PAK:00076:00607
GCTAAGATTGTGTTTCACGTTACA

>D8PAK:00078:00618
TTAACATTGTATTCTGGAGTACAT

>D8PAK:00079:00609
ACCTCAACTGTGAGCTGAGTTACA

>D8PAK:00079:00634
TACTAGATTGTGTCGTATCTTACA

>D8PAK:00079:00637
ATGTCTGTAGCCCAGAATACAATC

>D8PAK:00079:00647
AAAACTTTGTATGGCAGAATACAT

>D8PAK:00079:00648
ACGCCAACTGTGTGTTGCGTCACA

>D8PAK:00080:00604
AATCAACTGTACTCTACGATACAC

>D8PAK:00081:00606
GATCACTTTGTAACCCAGCATACC

>D8PAK:00081:00645
GTTACAACTGTGCCCTTGGTCACA

>D8PAK:00082:00633
TCATCAACTGTACTCTGGGATACT

>D8PAK:00084:00604
GTTCGGTTTGTGGTCCCGCTTACA

>D8PAK:00084:00605
CTTATGTTTGTAGTCTCCATTACA

>D8PAK:00084:00643
CCGCCGATTGTATCACTGGCTACA

>D8PAK:00086:00600
ATCGCAACTGTATGCATGACTACA

>D8PAK:00087:00620
TTGTGTGCTAGGTCACACTCTTAC

>D8PAK:00087:00621
TTTAGAATGTATCCCCCGACACAT

>D8PAK:00088:00603
ACAGTATTGTGGTCCATAATACAT

>D8PAK:00088:00607
CCCGTAAATGTATTCCCACACACA

>D8PAK:00088:00611
CGATACTTTGTACTCTAGCTCACT

>D8PAK:00088:00643
TTGTGACCGAGGACACAATTGCAC

>D8PAK:00089:00623
TTGTAATATCGGATACAATGATCT

>D8PAK:00089:00640
CCTACGTTTGTAGTCTACGCTACT

>D8PAK:00090:00608
CCAGACTCTGTAACCCTGACCACA

>D8PAK:00090:00644
TGACTGATTGTAGCATGTATTACT

>D8PAK:00091:00605
TACAACAATGTATTCCAACACACA

>D8PAK:00092:00610
ACCATATTGTATTACAGAGTACAC

>D8PAK:00092:00619
TACTGTGTCCTGCCATACAATTCC

>D8PAK:00092:00633
TCAGACTTTGTATCCCAGACTCCA

>D8PAK:00092:00636
CATAGAACCGTATGTTATACTACA

>D8PAK:00094:00620
ATACTCATTGTGAGCTGGCTTACA

>D8PAK:00094:00648
AACGACACTGTATCCCTGGCTACT

>D8PAK:00095:00602
TATATACATGTATTCTAACGTACA

>D8PAK:00095:00607
GATTCCATTGTATTTTGTCTTACA

>D8PAK:00095:00648
GCCCCTATTGTATGCTAGGTCACT

>D8PAK:00096:00612
ATAAGAATGGTATCCTGTACTACA

>D8PAK:00096:00620
GCCGAATGTATCCTAGGGTACACA

>D8PAK:00096:00649
GATTAAAAAGTAGCGAGTGCTACA

>D8PAK:00098:00639
GGATAAACTGTATTACAGACCACT

>D8PAK:00099:00601
TCCAACAATGTAATGCACGCTACT

>D8PAK:00099:00648
TTGTATGTTGTACTACAATACCCT

>D8PAK:00050:00661
TGCTACGTTGTCGATCTGCATACA

>D8PAK:00050:00687
TTCAGGATCGTGGCCCAGACTACT

>D8PAK:00051:00658
GGCAAGATTGTATTCCCAGTTATA

>D8PAK:00051:00664
AGGCTGAATGTGGCCCCCGATACA

>D8PAK:00051:00680
GTTTGCACGCATCCTGGGACCTGC

>D8PAK:00051:00691
GTGCGAATTGTATCCACCAGTACA

>D8PAK:00052:00683
AGTCAATCTGTAGCCTATATTACA

>D8PAK:00052:00684
TAGTGACCTAGCATACAATAATTT

>D8PAK:00053:00681
CAGATTGTGTCCCGCGCTACAATC

>D8PAK:00054:00667
TTGTGGCCCATAGCTACAATTCGA

>D8PAK:00056:00664
TAGTGGCCCAGGATACATTTCACA

>D8PAK:00056:00682
ATCGACATTGTGAGCTCAGATACA

>D8PAK:00056:00699
GGATCGTCTGTAGTCTCTAATACA

>D8PAK:00057:00677
TATTATATTGTAGCATGCGCTACT

>D8PAK:00058:00679
CTCAGTTCTGTATCACGCAATACA

>D8PAK:00059:00683
TAGTAGTCTGTAATACACTCTTCG

>D8PAK:00061:00650
AAACACATTGTGTTCTGGGTCACT

>D8PAK:00061:00667
TGTGCGTTTGTGGTCTAGGCCACT

>D8PAK:00061:00671
TTGTGACGTGGAACACAATTTCTT

>D8PAK:00061:00698
TCTTTAAAAGTATTGTGTATTACA

>D8PAK:00062:00699
TTTAAGACTGTGCTTAACGCTACA

>D8PAK:00063:00653
AATGTAAATGTGGCGTGAACTACA

>D8PAK:00063:00679
AAACGGAAAGTAAGCTTTAATACA

>D8PAK:00063:00689
CCAAGATTTGTATCTCAGATTACA

>D8PAK:00064:00651
AGGAAGTCAGTATCCCAGGTCACA

>D8PAK:00064:00666
TTATTTCTGTAGCCCAAGATACAA

>D8PAK:00064:00670
TTGTAACCTGTGTTACAATGGTAA

>D8PAK:00065:00654
GAAAATTTTGTATGCTTTCGTACA

>D8PAK:00067:00666
GCTAACTATGTATGCCTGGTTACA

>D8PAK:00068:00689
ATAGTAATTGTGATCTGGGATACT

>D8PAK:00069:00675
TCCTCTTTTGTGTCCTACGCCACA

>D8PAK:00069:00680
GCTCTAATCGTATCCTACCATACA

>D8PAK:00070:00665
AAACGAATTGTGGCCTAGGCTACT

>D8PAK:00070:00688
TCGAAATTGTGATCGGTAATACAT

>D8PAK:00070:00692
AGACAGCATCCAGCGTACGTGGGC

>D8PAK:00071:00683
CATCGAATTGTATGCCACCCCACC

>D8PAK:00072:00657
TTCACCAATGTGTCCTGAGGCACA

>D8PAK:00072:00668
CACATTATTGTATCCCAGCTTACT

>D8PAK:00072:00695
AAAAAGATTGTACTACAGAGCCCA

>D8PAK:00073:00678
AGTTAGTTTGTAGTCCTGCTTACA

>D8PAK:00074:00661
GCATTAAATGTATTCCAGACCACA

>D8PAK:00074:00674
ACTTCATTTGTGGTGCAGGTCACT

>D8PAK:00074:00675
TAAGCAAACGTGCCGTGCGCTACA

>D8PAK:00075:00675
GTTACAATTGTATTCTCTATCACT

>D8PAK:00075:00676
CAAATGTGTTCCAGATTACATTTC

>D8PAK:00075:00685
AACTCCATTGTATGCTGAGTTACG

>D8PAK:00076:00664
CTATGACCTGCATCCACTTCGTAG

>D8PAK:00076:00683
AGGGAGAAATGTGCTGTAGCCTAC

>D8PAK:00076:00694
TTGTATGTTATACCACATTGTTAT

>D8PAK:00076:00698
TTGTGCTCTGCACCACATTTCTAC

>D8PAK:00077:00658
CTGTAGTCCTCGTCACAATATACG

>D8PAK:00077:00678
GATTACATTGTGTCTTAAATTACA

>D8PAK:00077:00681
TTGGGAAATGTATCCTAGCTCACA

>D8PAK:00077:00685
GCTATCTCTGTAGCCTATACTACT

>D8PAK:00078:00660
CAGGGACTCTGTGTGCTGGAATAC

>D8PAK:00079:00657
ATTTTCTTGGTGACCCAGGGAACA

>D8PAK:00080:00654
GGGCCGAATGTGTACCGGACCACA

>D8PAK:00080:00663
TTGAACACTGTACGCTGGATTACA

>D8PAK:00080:00670
GAATGCATTGTATTCTCAGTCACA

>D8PAK:00080:00674
ATCATAATGCATCCGTTCCTCGAT

>D8PAK:00081:00662
GAAAATGTACTCCAGATTACACTT

>D8PAK:00081:00665
CACGTAAATGTGCCCCTCATTACA

>D8PAK:00081:00678
GTCATGAATGTGACACAAGACACA

>D8PAK:00081:00686
CCAAAGCTTGTAGTCTAGCATACA

>D8PAK:00081:00693
GTCATCTTTGTACTCCCCGCTACA

>D8PAK:00082:00686
TAAGCAAAATGTACGCTAGCGCAC

>D8PAK:00083:00654
CCCTCAAATGTATTGGAGCATACT

>D8PAK:00083:00685
AATCCGAATGTAGTATAACCTACA

>D8PAK:00084:00676
ATATCGTTTGTAGTATGCAACACA

>D8PAK:00085:00671
TTGTGACCCATCCTACAGTCCCTT

>D8PAK:00085:00673
ATCGGGTTTGTAGTCTTGCCCACA

>D8PAK:00086:00655
TTACAAATGTATTCCGGATCACAT

>D8PAK:00086:00658
ATGTATCATAGCCTACAATTCCGC

>D8PAK:00086:00685
AAATTTATTGTATTCTCCGCTACA

>D8PAK:00087:00676
GGTGCAATCGTAACCCAGACTACA

>D8PAK:00087:00699
ACCTAGAATGTATTCGGTCTTACA

>D8PAK:00088:00669
AAATTTGATCATCCATACGGATCA

>D8PAK:00089:00663
AGAAAGTTTGTGTCTTGGCCCACT

>D8PAK:00090:00656
ACTTACGGACATCCTCTACACTAA

>D8PAK:00090:00662
TTGTATTGCACAATACACTTCTAA

>D8PAK:00090:00665
GTCACGTATGTATCTTCGGATATA

>D8PAK:00090:00683
ACAACGTTTGTAACTTGGCCTACA

>D8PAK:00090:00694
CAGCACTTTGTATTCTGTACTAAC

>D8PAK:00091:00652
TTGTGGCGTAGCTTACAAACATTC

>D8PAK:00091:00656
CGTACTTTGTGGCGCAGCCTACAT

>D8PAK:00091:00671
ATGTATGCTACGTTACAGTTTCGA

>D8PAK:00091:00689
TCCCGAATTGTATTATGGACGACA

>D8PAK:00091:00696
TTGTGGCGTGGCATACACTTAACC

>D8PAK:00092:00665
CAACAAAATCATCCTGGTGGCCTT

>D8PAK:00092:00698
GCAATGATTGTATGTCAGATCACA

>D8PAK:00093:00658
GAAACGATTGTAATCCAAACTACA

>D8PAK:00094:00657
TTAAGGAATGTATCGTGGGATACT

>D8PAK:00094:00665
ATTCCCATTGTACTCCACGTTACA

>D8PAK:00095:00674
CTTTCCAGTGTGCTCTACGATACA

>D8PAK:00096:00656
TAGCAATTTGTATGCTTGCATACA

>D8PAK:00096:00671
TTATGGACTGTAATCTGACACACA

>D8PAK:00096:00673
TTGTATGGCTGGATACAATATTTC

>D8PAK:00096:00685
GACTCGAATTGTATCCGGGAGTAC

>D8PAK:00097:00677
AAACAATTTGTAGGCTACGTCACA

>D8PAK:00097:00679
TATACAATTGTATTTCCCGTTACA

>D8PAK:00097:00695
TTACGAATAGTAGCCCTGATCACA

>D8PAK:00099:00657
GAAGTAAATGTAGCTCAGATCACA

>D8PAK:00099:00662
TAGAACATTGTACTAAGGAATACA

>D8PAK:00099:00663
ATGGGGAATGTATCCAGACGTACA

>D8PAK:00099:00695
AATGTAATAGTGCCGTTGACTACA

>D8PAK:00050:00721
CTCTCGATTGTGGTCTGAGTTACA

>D8PAK:00050:00744
GTTAATTTTGTATTTTGGGATACG

>D8PAK:00051:00701
ACTGTTATTGTATCCCCGCATACA

>D8PAK:00051:00714
AATCAAATTGTGCCCTACACTACT

>D8PAK:00052:00733
CTTTCTGTAAGCTATAATACAATT

>D8PAK:00052:00735
CACGAATCTGTGTCATAGAATACA

>D8PAK:00053:00744
TTAGACATTGTAACCTCGGTCACA

>D8PAK:00053:00746
TTGTAGTCTATAACACTATGTTCG

>D8PAK:00053:00747
TTGTATCCTAAGTTACACTTCGCG

>D8PAK:00054:00705
ACCGGAAATGTGACTTAAAATACA

>D8PAK:00054:00741
TTGTATCGTATGACACACTTGTGT

>D8PAK:00055:00716
TTCCGGTTTGTAGCCCGCACCACA

>D8PAK:00055:00717
TGTTTAACTGTAGTCTTACATACA

>D8PAK:00055:00731
GCCGTCACTGTAGTCCAACTTACA

>D8PAK:00056:00712
GCTCTATTTGTAATCCTCACTACA

>D8PAK:00057:00707
TCTGTGCTACCATCCTACTAAGCC

>D8PAK:00057:00721
CGATGAGCTTCATCCGAGACGTCT

>D8PAK:00057:00727
ACTTATTCTGTATCCTGTGTCACA

>D8PAK:00058:00707
TTGTAATCTATCCCACAGTTTTCA

>D8PAK:00058:00711
CCTTTTTCCGTATTCTAAGTCACA

>D8PAK:00058:00739
AGGATTGTATGCTGCGTCACAAAT

>D8PAK:00059:00727
CTTGAGAAGGTAACCCTGGATACA

>D8PAK:00059:00732
GGCAATTTTGTGGCATTGGCTACA

>D8PAK:00060:00721
CCAGACTTTGTAGTGTGTGATACA

>D8PAK:00060:00727
GATCAGATTGTGTTCTTGCCTACT

>D8PAK:00060:00731
TTGTCATTCAGAATACAATCTCTT

>D8PAK:00060:00735
GAACTAACTGTGGCGTGCGATACA

>D8PAK:00061:00712
GATGTTGCAACATCCGTGTGTGCC

>D8PAK:00061:00739
TCACTGATTGTAGGCTTCACTACA

>D8PAK:00062:00730
GTAAAAGTGTATCCTACGTCACAC

>D8PAK:00062:00737
TCCTAGATCGTAATCTATGTTACA

>D8PAK:00063:00700
CCTAGATCTGTAGCCCACGATACT

>D8PAK:00064:00712
CATTGTGTCCTGTCATACATTGCT

>D8PAK:00064:00719
ATGCTAAATGTATTGAGCCGTACA

>D8PAK:00065:00702
TATAGGAATGTGACCCACGTTACA

>D8PAK:00065:00709
ATGTGACGTGCATCACAGTTTGAA

>D8PAK:00065:00710
TAACAAATTGTAGCCCTGACTACT

>D8PAK:00065:00732
GTTCTCTTTGTATGACAGCCCACA

>D8PAK:00065:00739
ATTCTCTGTGTATGCTAGCATACA

>D8PAK:00067:00707
GCTTCAATTGTAGCCTACACTACG

>D8PAK:00067:00728
TAACCAATTGTAACCTGCGTCACA

>D8PAK:00067:00730
CATCAGATTGTGACATAAATTACA

>D8PAK:00067:00738
ATCGAATTTGTGTCTTATCGTACA

>D8PAK:00068:00748
ATGTAGCCTGGGATACATACTGAC

>D8PAK:00069:00732
ATCGACTTAGTGCTCACGATCTAC

>D8PAK:00069:00744
GATTTTTCCGTAGTCCCGGGAACA

>D8PAK:00070:00741
AACAGACTGTATGATAGGCTACAT

>D8PAK:00070:00744
CTGTGCTCTGTATTACATTTGCTG

>D8PAK:00070:00745
GCGTCGTTTGTAGGCTGGCTTACA

>D8PAK:00071:00702
GAAAATTTGTGCTTCGGACTACAC

>D8PAK:00071:00706
GTTACACATGCATCCGGGTATCTG

>D8PAK:00071:00710
TCTTCGACTGTGTTACCAGTTACA

>D8PAK:00071:00737
TTCATAAATGTCGTCCCGGTTACA

>D8PAK:00071:00745
ACACATTGTGTTCTACCTTACTAT

>D8PAK:00072:00704
GCGGTACGGCATCCTACTTTGTTC

>D8PAK:00072:00729
GTATACTTTGTGTTGTAGAACACA

>D8PAK:00072:00735
CTTATAATTGTGCCCCGCCCTACA

>D8PAK:00073:00713
ATAAACTTTGTAGCCCAAGGCACT

>D8PAK:00073:00728
GAGGAGATTGTAATTAAGAATACA

>D8PAK:00074:00729
AAAAACTCTGTAGCCTGTACCACA

>D8PAK:00074:00743
GACAGCTTTGTAATTGGGAATACT

>D8PAK:00074:00744
TTTAATTGTAGGACAGGCCACAAC

>D8PAK:00074:00746
TAAAATATTGTATCACAGACTACG

>D8PAK:00075:00723
TTGTGTCTTGAACTACAATCTGTG

>D8PAK:00075:00735
ATGGAGACTGTGTGCCGGATCACA

>D8PAK:00076:00702
ACTCGGTTTGTAGTGGACGATACA

>D8PAK:00076:00709
ATGAAGACTGTATCCGACACTACA

>D8PAK:00076:00727
CTGACTTTGTGACCCTGAATACAT

>D8PAK:00077:00732
GTTGAAACTGTAATCCAAAGTACA

>D8PAK:00077:00739
CGAATAGTGACTTGGGTCACATTC

>D8PAK:00077:00746
TTAAAATTTGTAGCTTAAGGTACA

>D8PAK:00078:00703
GCGTCAAACGTAATCTACGTCACA

>D8PAK:00078:00722
CAAAGTGACCTAGAATACAATTAG

>D8PAK:00078:00733
CCCACAATTGTAGCCTAGGCTAAC

>D8PAK:00079:00704
CAACTGATTGTGTTTTGAAGCACA

>D8PAK:00080:00702
CACGTGATTGTATTCTCGGTCACT

>D8PAK:00080:00729
ATCTGAATTGTGTTGTAGGTGACA

>D8PAK:00080:00731
CAATAGAATGTAGCCTGACGTACA

>D8PAK:00080:00739
TCCGTAAATGTGGGCTGTGCTACT

>D8PAK:00081:00711
TGATTGATCGTGCTCCCGAATACA

>D8PAK:00081:00719
TTAGGATTTGTAGTCCAACATACA

>D8PAK:00081:00726
TTGTGTCCTTCATCCCAACCTACC

>D8PAK:00081:00739
ATGACGACTGTAACCTACATTACT

>D8PAK:00082:00734
TAGAAACATGTAGTCTAGACCACT

>D8PAK:00083:00714
GACTTAACTGTGTTCCAGAGCACT

>D8PAK:00083:00717
GTGTAAATTGTGCTCCCCCAATAC

>D8PAK:00083:00748
GAATGAATTGTAACGGGACCTACA

>D8PAK:00084:00700
TTTCAAATCGTAGTGTAGAATACA

>D8PAK:00084:00708
AGAGAAATTGTGGTTTACATTACA

>D8PAK:00084:00724
CCAATTGTGTGCTAGAATACATCT

>D8PAK:00084:00733
TTTTGAACAGTATTCTGAACTACA

>D8PAK:00085:00704
GTCTAAATTGTGCCTTAACCTACA

>D8PAK:00085:00711
AGAAATGTGGTCCGGATTACAATT

>D8PAK:00086:00703
ACAAATTCTGTATTCTAAGCTACA

>D8PAK:00086:00730
TACGTAATTGTATTCCAGACCAAC

>D8PAK:00087:00726
ATGTGCCCTAGCACACACTCTGAT

>D8PAK:00088:00747
GAATCGATTGTGACTTATGTTACA

>D8PAK:00089:00702
TACGACACTGTATGCTAAGATACA

>D8PAK:00089:00739
TTGCCGAGTGTGACGCAGAGTACA

>D8PAK:00090:00710
ATGTGACCTGTCCTACAGTTAGTT

>D8PAK:00090:00742
AGTTTCTTTGTATTAAGCGATACA

>D8PAK:00090:00749
CGGAAAATTGTGCCCCACAATACC

>D8PAK:00091:00708
AAAGGAATTGTGGCTTGCACTACA

>D8PAK:00091:00747
CATTCAGTTTGTATGCCCGACTAC

>D8PAK:00092:00711
TTAGTCAATGTATTCCACGATACA

>D8PAK:00092:00731
CGCATGTTTGTAATGTGCGACACA

>D8PAK:00093:00712
AAATTTCTGTGTTGCACATTACAA

>D8PAK:00093:00720
TCGACAATTGTGCTCCACCATACT

>D8PAK:00094:00704
ACGGAAAATGTATCCGAAGTCACA

>D8PAK:00094:00720
CGTCAAATTGTGGTCTGTATTACA

>D8PAK:00094:00731
CAAACTGTGGGCCGAACTACAAAC

>D8PAK:00094:00748
TCCCAATTTGTATCGTGGGTCACA

>D8PAK:00095:00713
AGAAATCTTGTATTGTACGCTACA

>D8PAK:00096:00721
CCTAGTTAGTGTCCTGTCATACAT

>D8PAK:00097:00718
ACGTTCTCAACATCCGCGTAGCAC

>D8PAK:00097:00729
ACGATGTTTCGTATTCGCATTACA

>D8PAK:00097:00739
GGCTTAATTGTATCGTGTGATACA

>D8PAK:00098:00714
CCCGCATCAGTATGCTACGCTACA

>D8PAK:00098:00725
GCCTCAATTGTGACTCACGACACA

>D8PAK:00098:00728
AGTTGCACTGTGCTTCACGATACA

>D8PAK:00098:00731
AGAGAATTGTATCCTATCCCACAA

>D8PAK:00098:00744
GTAATAAAGGTAAGCTGGACCACA

>D8PAK:00050:00769
AAAAACGCTGTATGTTGCGATACA

>D8PAK:00050:00786
ATAGTTCTCCCATCCGCTCTGATT

>D8PAK:00050:00793
AAGTGATTTGTGTTGTGCGATACA

>D8PAK:00051:00762
AAGGGATTGTGTTGTACAATACAA

>D8PAK:00051:00768
TTCTCAAAATGTATTACGTCTTAC

>D8PAK:00052:00752
GTATTCATTGTATTCTGAAATACA

>D8PAK:00052:00763
AAAAATCAGTGTCCTGGATCACAC

>D8PAK:00052:00795
CCTTCAATTGTACTCAAGGTTACA

>D8PAK:00053:00766
CTGGAGAAAGTAGCCTGCGTTACT

>D8PAK:00053:00770
TACCGCAGTCCATCCTAGGACCAT

>D8PAK:00053:00798
CATATTTTTGTAGTGTGGACCACT

>D8PAK:00054:00752
TTGTATTCTGTAATACATTTAGGC

>D8PAK:00054:00758
GAGGAGACAGTAATCCCTAATACA

>D8PAK:00054:00761
TTGTAATCCAGGCCACAGTAAGGT

>D8PAK:00054:00769
ATGTATTCTACCTTACATTCTTAT

>D8PAK:00054:00786
ATCCGGACTGTGAGTCCGCTTACA

>D8PAK:00054:00794
GCGTTCTTTGTATCCTACATTACA

>D8PAK:00055:00757
TAAACGAACTGTATCGGGGACTAC

>D8PAK:00055:00761
GGTCTAACTGTATCCGGTCATACA

>D8PAK:00055:00768
AATGACATGGTATCCTGTATTACA

>D8PAK:00056:00769
ATTTGAATTGTATTGTTGCCTACA

>D8PAK:00057:00798
AAATAAATAGTATGCCTGAGTACA

>D8PAK:00058:00794
TTGCTAACTGTGACATAAAATACA

>D8PAK:00059:00753
ATTAGGATTGTATTGTGACATACA

>D8PAK:00059:00794
AAAGATTGCAATGTATGCTTCAAT

>D8PAK:00060:00781
GTTACAATTGTGTCCTGGGTCTCA

>D8PAK:00061:00764
AAAAAGTTTGTGCGATACGCTACA

>D8PAK:00062:00793
GCAAAATTGTATGCTATCATACTC

>D8PAK:00062:00795
CATGTGTTTGTATGCTATACTACA

>D8PAK:00063:00762
AAGGCATTGTAACCGGGACTACAA

>D8PAK:00063:00796
TTGTATCAGCGCATACAATCTGTC

>D8PAK:00064:00764
AGTTGGATTGTGTAATGGGTCACA

>D8PAK:00064:00781
GCGTAGTCTAGAATACAATCTCAT

>D8PAK:00065:00752
CTAGGAATTGTCATTTAGGACACA

>D8PAK:00065:00770
CCTAAGTTTGTATCCTATACTACA

>D8PAK:00065:00777
ACAACATTTGTAACTTGGCCTACA

>D8PAK:00066:00769
AGACAGCTATCATCCAGGGACTTT

>D8PAK:00066:00778
CAATTATTTGTACTGTACAATACA

>D8PAK:00066:00793
AGTGGGATTGTGTCCCAGAGTACC

>D8PAK:00067:00752
ATATCCTTTGTGTCCCCGATTACA

>D8PAK:00067:00777
AATTAAATTGTAGCCTACGTTATA

>D8PAK:00067:00795
TACACAAACGTAGCGCCGCATACA

>D8PAK:00069:00775
TTTGTCAATGTAATTTGCGCTACA

>D8PAK:00069:00798
AGCGAGTTCGCATCCATTGAATTG

>D8PAK:00070:00751
ATGGCGATTGTATCCCAGCCTCCA

>D8PAK:00070:00795
CTACTTGAACCATCCACCTAAGAT

>D8PAK:00071:00784
CCGCTAATTGTGGTCTAGGACACT

>D8PAK:00071:00786
CCCCTGTTTGTGACTCCCACTACA

>D8PAK:00072:00783
CTGGAAATTGTAGTTCAAGATACT

>D8PAK:00072:00799
GAAGCAACTGTAACCTAACATACT

>D8PAK:00073:00758
GAACGCGCGCATCCCGCGGCATCA

>D8PAK:00073:00764
CGATTTGTATCATGGAATACTATT

>D8PAK:00073:00777
ACTAGTTTGTATCGCAGGTTACTT

>D8PAK:00073:00786
TCGATGATTGTATCCCCGGGTACA

>D8PAK:00073:00792
GTCCTTAATGTATTCCCGCCAGCA

>D8PAK:00075:00750
CGATAAGTAATCTAGCATACAATT

>D8PAK:00075:00753
AACATGATTGTGTCCCCTCTTACA

>D8PAK:00075:00756
AATGCAATTGTGCGCCAGGATACT

>D8PAK:00075:00775
TTGTATGCAGCATTACAAACTTGG

>D8PAK:00076:00754
GGGAAATGTGTATTCAGTCATACA

>D8PAK:00076:00769
AATCGTTTTGTGTTCTAGGACACT

>D8PAK:00076:00776
GATATAACTGTAGTCCACATCACA

>D8PAK:00077:00765
ACAACAACTGTATCCTACACCACA

>D8PAK:00077:00773
CCATTCTTTGTGTGCTGGCCCACA

>D8PAK:00077:00782
TTGTAACCTGGAACACAAAATCCC

>D8PAK:00078:00754
GCTATAATTGTATTGCCGCATACA

>D8PAK:00078:00786
TCTCGAATTGTATCTCTGCCTACA

>D8PAK:00079:00753
CCTAAATATGTGCCCTCGGCTACA

>D8PAK:00079:00756
GCCGCGTTTGTAACACACGCCACA

>D8PAK:00080:00777
ATGTATTTTGGAATACAATCAAGG

>D8PAK:00081:00760
TTTGGGGCACCATCCATGTGTCTG

>D8PAK:00081:00781
GACCCAACTGTATGCTAGGTCACA

>D8PAK:00081:00789
CCAAGTCTTGTATTTTGGCTTACA

>D8PAK:00081:00791
ACTCATTGTAACGCCCAATACATT

>D8PAK:00081:00795
TTACAAAGTGTAAGCGAGAGTACA

>D8PAK:00082:00765
TTTACGATTGTATGATAGGACCCT

>D8PAK:00082:00768
AATATGATAGTATTGTATAATACA

>D8PAK:00082:00798
ATAGTAAACGTAGCAGGGAATACA

>D8PAK:00083:00759
CAAAGCCTTGTATCCGAGCATACA

>D8PAK:00083:00774
TGCAGAATAGTATCCTGGGTTACA

>D8PAK:00083:00782
TAACCGATTGTATCTCATCCCACA

>D8PAK:00083:00786
ACCCTAATCGTATTTTGGGTCACA

>D8PAK:00084:00757
TTGTATCCCAGGATACAAGTGCTT

>D8PAK:00084:00788
CTCCGATTGTAGTCCTCAATACAT

>D8PAK:00084:00792
GAAACGATTGTAATCCAAACTACA

>D8PAK:00084:00795
CGGTTTGTATCCCGGCTTACATTT

>D8PAK:00084:00798
CTACCAATTGTGGCGCAACACACA

>D8PAK:00085:00773
TAATTAACTGTCACTTAGCCTACA

>D8PAK:00085:00777
ATCAAGTTTGTGTGCCTGGGCACA

>D8PAK:00085:00783
TCGTAGAATGTATTGAGGCGTACA

>D8PAK:00086:00752
TTGTGGTTCGCGCTACAATTGCCG

>D8PAK:00086:00756
ATCTCGATTGTATTTGAGAGTACA

>D8PAK:00086:00789
TGACGGACTGTGACGTGGCCTACA

>D8PAK:00087:00785
CAATGTAGGCCACACCACACTTCG

>D8PAK:00088:00787
GAAGTATTTGTACTTCTACACTAC

>D8PAK:00088:00798
CAAAAAACTCCATCCGGAACTTGT

>D8PAK:00089:00761
CCTCTGAATGTATTCTAGATTACG

>D8PAK:00089:00763
ACTAAGATTGTAGCTTACCACACA

>D8PAK:00089:00780
TTGTATCCCAAAATACACTTTGTC

>D8PAK:00089:00785
ACCTATTGTGTAACCTAGCTCACA

>D8PAK:00089:00795
CTGCCAACTGTAACCCAAGGCACG

>D8PAK:00089:00799
GCGGAAACTGTGGCCCATGACACA

>D8PAK:00090:00785
GACCAGATTGTATCATAGCGTACA

>D8PAK:00091:00779
GCGGACTATGTATCTCAGAATACA

>D8PAK:00092:00778
TTGTATGCTATGTTACAATCTCTT

>D8PAK:00093:00773
TAACAAATTGTAGCCCTGACTACT

>D8PAK:00094:00767
TTGTGCCTTGGACTACATTTTGGA

>D8PAK:00094:00781
CCGTAATGTGTATGCTGGATTACA

>D8PAK:00094:00796
TTACCGATTGAGTGCTAGACCACG

>D8PAK:00095:00755
ATATGAAATGTGACTTACGCTACA

>D8PAK:00095:00761
TTGTATCGTGTAACACGGTTTATG

>D8PAK:00095:00769
AAACATGTGCCCCATGATACAATT

>D8PAK:00095:00772
TGAAATGTGCTTTAGCCTACATTT

>D8PAK:00097:00756
TCCAATTGTATGCTGCCATACTCA

>D8PAK:00097:00759
AATCGCAGTGTAGCGTGGCCTACA

>D8PAK:00097:00765
ACGACGATTGTACCCCACAGTACT

>D8PAK:00050:00838
TTGTATCGTGGGTCACAATACAGT

>D8PAK:00051:00827
ATTAGCAGTGTGGCCTGCGTCACA

>D8PAK:00052:00819
ATACAAAACGTATGCTGTCTTACA

>D8PAK:00054:00802
TTGTATCGTAGCATACTATGTTTG

>D8PAK:00055:00818
TTGTATGCTGGGTCACATATCAGT

>D8PAK:00056:00835
TCGCGAACTGTGGCCCAGGGTACT

>D8PAK:00056:00845
ATGTGGCCTGGACCACACTGCCAT

>D8PAK:00060:00819
GACTCTGTAGTGCAGAATACAATA

>D8PAK:00061:00809
TAATAAACTGTGCTATAGCCCACA

>D8PAK:00061:00820
AAATACAATGTATTTAGGCCTACA

>D8PAK:00062:00822
ATTAAGACTTGTAATTAGACTACA

>D8PAK:00062:00823
TTGTATTCTACCTCACACTTGATA

>D8PAK:00062:00833
AACGTCTTTGTAACCTAGTGCACA

>D8PAK:00063:00814
TATATAGTTGTAAGCTAGGCCACA

>D8PAK:00063:00826
TCGAAAATTGTATTCCATGATAAC

>D8PAK:00064:00807
TTGTATTCTATCTTACAAACGTGG

>D8PAK:00064:00809
GTAACAACAGTATTCCAGGCTACT

>D8PAK:00064:00821
TCTAACTTTGTGACCTGTGCTACT

>D8PAK:00065:00829
ATTTTTAATGTATGCTCGCTCGCA

>D8PAK:00066:00813
GACCTGAATTGTATCGTACACCAC

>D8PAK:00066:00823
CGATAATTGTAACCCGGCACACAC

>D8PAK:00067:00801
CATAATGTATCCTGAGATACAATA

>D8PAK:00067:00822
GCAATTAATGTATGTTAGAATACA

>D8PAK:00067:00830
TACCAGAATGTGGGCTACGTTACA

>D8PAK:00067:00838
ATTCACTTTGTGTCCCAAGATACA

>D8PAK:00068:00802
AGCCACTTTGTAAGCCGTAATACA

>D8PAK:00068:00839
CTTTTTTTGTGTCTCAGCATACAA

>D8PAK:00068:00844
CTTAACATTGTAGCCCGGCACACA

>D8PAK:00068:00846
CCCAGAATGTGGCGGGCGTTACAA

>D8PAK:00069:00822
TTAACCACTGTGCTTTGGAATACA

>D8PAK:00070:00807
TCTGATTGTACGCGGCGCCACAAT

>D8PAK:00070:00813
AAACTAATTGTGACTCCTAATACG

>D8PAK:00070:00824
CCGAAGATTGTAAGTCCTGCTACA

>D8PAK:00070:00829
GAGTAAATTGTGATGTACGATACC

>D8PAK:00073:00804
CCCTAATTTGTCATCCTGGATACA

>D8PAK:00074:00817
TTACGGATTGTATTCCAAGTCACG

>D8PAK:00074:00846
GAAAGTGTACCCTGCGTTACACTT

>D8PAK:00075:00802
AGTCACTTCGTGTCCTAGGTTACA

>D8PAK:00076:00828
TTGTGACCGTGATTACAATTCGTT

>D8PAK:00076:00840
AACCCCTAGGCATCCTTGTTACCT

>D8PAK:00077:00814
ATCTATGTAACCTGGCCTACAGTC

>D8PAK:00077:00815
TACAAGTTAGTAAGCCAGCCTACA

>D8PAK:00078:00844
CGCCTAATCGTGTCTCAGGACACA

>D8PAK:00079:00805
TTGTAGCGCAGGCTACCGTTGATT

>D8PAK:00079:00819
GAGGAATTTGTAGTTTGGACTACT

>D8PAK:00079:00827
CCCATAAATGTACTCAGGGTCACA

>D8PAK:00080:00849
GAACTCTCTGTAACTTGGGATACA

>D8PAK:00081:00813
TAAAACACTGTGGTCTAGCCCGCT

>D8PAK:00081:00844
TGGAACTTGTAGCCTGTCATACAC

>D8PAK:00082:00822
GCGACTGTAGTCCAAGCTACTATT

>D8PAK:00082:00824
ACCGAAAATGTGCCATGGATCACA

>D8PAK:00082:00833
GTTTCGTTTGTGTCCGTCAATACA

>D8PAK:00083:00809
TTCGCCTATGTAACTTACGATACA

>D8PAK:00085:00801
AACAGGATTGTATTCTGCTGCACA

>D8PAK:00085:00804
AAATTGTGTTCTGGGACACAATCC

>D8PAK:00087:00819
TTGTAACTTGCGATCACATTCTAT

>D8PAK:00087:00837
TGTGATATCGTAGCCTGTCATACA

>D8PAK:00087:00845
ATGGAGTTTGTGACTTGAACTACT

>D8PAK:00088:00845
CCCAAAAAAGTAGTCACCAATACA

>D8PAK:00088:00846
CACTTGATTGTAACCACCATTACA

>D8PAK:00088:00848
TCTCAAATAGTAAGCGGGGTCACA

>D8PAK:00089:00800
TAGTACTCCAGGATACATTTCAAT

>D8PAK:00089:00806
CAGCGGAATGTGCTCTACGCCACA

>D8PAK:00089:00821
TTCAATTTGTAGCATCTATTACAA

>D8PAK:00089:00832
TTACGGTCTGTATTCCAGTATACA

>D8PAK:00089:00839
AAAGGAATTGTGGCTTGCACTACA

>D8PAK:00089:00841
CTTGATTGTAAGGCAACCTACAGT

>D8PAK:00090:00811
AACTTTGTAGCCCAGAATACAATG

>D8PAK:00090:00828
TCTAAACTGTATCGGGGGCTACAT

>D8PAK:00091:00803
GATATCTTAGTATTCCAGCATACA

>D8PAK:00091:00807
CCCTTTTTTGTGTGCTAGGTCACA

>D8PAK:00091:00819
AGGTCTTTTGTAGTTTAGACTACA

>D8PAK:00091:00847
ATCGTTCTTGTAGTCTACACTACA

>D8PAK:00092:00835
AATTAAATCGTAGCCCAAGATACA

>D8PAK:00093:00800
AAGCAAATTGTATTTCGTAATACA

>D8PAK:00093:00820
CGCGTAAGATCATCCGGCTTACTA

>D8PAK:00093:00828
AATGCGTTTGTAACCTGGAGCACT

>D8PAK:00093:00848
TCGTTATTGTGACTCATGATACAC

>D8PAK:00094:00818
TTGTAATACAGAATACAATGCCAA

>D8PAK:00095:00840
ATTTATTTTGTAGTCTAAACCATA

>D8PAK:00095:00841
GTCCCAAAAGTACCCTGGATTACA

>D8PAK:00096:00800
AAAGAGAAAGTATTCCATGTTACA

>D8PAK:00096:00803
ATTTGAACAGTGTCCCATCATACA

>D8PAK:00096:00820
GCTTCGATTGTAGTCCGCACCACA

>D8PAK:00096:00840
TTGTATCTTAGAACACTATTCTAC

>D8PAK:00097:00825
GTCGAAACTGTAGGCCAAATTACA

>D8PAK:00097:00829
GGAATTGTATCCTAAGCTACTAAC

>D8PAK:00098:00837
CTTCGAATTGTAGCACGGGTGACA

>D8PAK:00099:00823
AACGCAATTGTATGCTGCACTCAA

>D8PAK:00099:00824
CAAACAATTGTAACCCATGCTACA

>D8PAK:00059:00853
ATGGAGTTTGTGACTTGAATTACT

>D8PAK:00062:00856
CTGTGACGCAGAATACAATTTGTT

>D8PAK:00063:00851
AATTGTATGCTGGAATACCATTGC

>D8PAK:00063:00854
TCTAGAACTGTGAGGGAGAGTACA

>D8PAK:00067:00860
AAATCTTTTGTAGCTTCCACTACT

>D8PAK:00067:00865
AAAGAACTTGTATCCTACGTTACA

>D8PAK:00069:00884
CGCTAAATCGTAGCGCATAATACA

>D8PAK:00070:00864
AGTCCCACTGCATCCAGTTATTGG

>D8PAK:00070:00866
GTGGCCATTGTGTCCTACCATACA

>D8PAK:00071:00859
AAATGAAATGTAATACAGTACACA

>D8PAK:00071:00860
CTAATTGTATCCTAAAATACAATA

>D8PAK:00072:00857
TTTCGAAATTGTAAGCTCTGGCAC

>D8PAK:00072:00878
TTTCGAAGTGTGATGTGGAGTACA

>D8PAK:00073:00877
CTGTGTTCTCGAATACAATTGGCC

>D8PAK:00075:00862
AATATAACTGTATCTCCGCCTACA

>D8PAK:00076:00850
ACATAAATTGTAGGCTGCAATACT

>D8PAK:00076:00861
GCTCTGATTGTGACCCTCACTACA

>D8PAK:00076:00872
TTTAAGTTTGTATTCAGGCACACA

>D8PAK:00076:00873
ATGTATGCTGAGTCACAGTCTAAG

>D8PAK:00076:00875
GAACCAATTGTATCCGGGATCACC

>D8PAK:00077:00893
TTTGCAATTGTATTATAGCATCCA

>D8PAK:00078:00877
TCTGCAACTGTGATCTCGCATACA

>D8PAK:00078:00881
ATTCAAATTGTATTCGGACTTACA

>D8PAK:00079:00861
CGCCATATTGTAATCCAAGGCACA

>D8PAK:00079:00885
CTGTAGCCCAGGCTACTTAATTAA

>D8PAK:00079:00899
TTTAACATTGTAGCGCACCAGACA

>D8PAK:00080:00870
CATATAACTGTATGCCTTGCTACT

>D8PAK:00081:00855
AAAAAATAGTAGCCTGCGCTGCAA

>D8PAK:00082:00854
GTGTGTCACAGACTACAATTGACC

>D8PAK:00082:00860
TAAAACTTTGTATGTTAAGGTACA

>D8PAK:00082:00863
ATTTTTTGTATGTTGTGACACAAT

>D8PAK:00082:00872
TGAGCAATTGTAATACAGCATACA

>D8PAK:00082:00878
TGTTCGACTGTGTGCCACACCACT

>D8PAK:00084:00853
TTGTATCTTGCACTACACATAGGT

>D8PAK:00084:00858
TCCCGAAGTGTGAGCTAGCACACA

>D8PAK:00084:00864
ACGCGCAATCATCCTGTTCGTAAT

>D8PAK:00084:00880
CCCCAATGTCCATCCGTTCCCAAA

>D8PAK:00084:00893
CATTTTATTGTAGCACAGAGTACT

>D8PAK:00085:00850
TTCTAAACTGTGATCGAGCATACT

>D8PAK:00085:00853
AAACTTGTACCGTGCTCGCCATAC

>D8PAK:00085:00859
TAGCTGATTGTAACCTGGCCTACA

>D8PAK:00085:00874
TTGTGTTCCAAAACACAAATAGGC

>D8PAK:00085:00890
CCCTAAAATGTGGCCAGTGTTACA

>D8PAK:00085:00896
AAAAGGAAAGTATGGTACACTACA

>D8PAK:00087:00859
TGCCAGATTGTAACGTGTGCTACT

>D8PAK:00087:00871
GGTTTAATTGTAGTTTAGATCACA

>D8PAK:00087:00886
ACCGTCTTTGTATGTTACACTACA

>D8PAK:00088:00862
GTGCTTAAATGTACTCGCGCATAC

>D8PAK:00088:00867
CTCTACTTTGTATGCTGGGATACT

>D8PAK:00088:00875
GTGGAAATAGTATCACAGACTACT

>D8PAK:00088:00899
CGTTTGACTGTATTCCAGTGCACA

>D8PAK:00089:00869
CCCTCAACTGTATTTGGAGCTACA

>D8PAK:00090:00868
ACCTGAATTGTGATCAGGAGCACT

>D8PAK:00090:00869
AATCAATTGTATGACACGATACCA

>D8PAK:00090:00885
GACGAATTTGTGTGCTAGATTGCA

>D8PAK:00090:00895
TTGTGGCATCCGGATCGTAATAAC

>D8PAK:00090:00898
GTAAGTGTATGCCACGCTACAAAA

>D8PAK:00091:00882
GCGCCAATTGTGTCACACGATACT

>D8PAK:00091:00899
TAGTAATTGTAAGCTCCGTCACAA

>D8PAK:00092:00857
TTGCTCATTGTACCCTAAGATACA

>D8PAK:00092:00874
AGACGAATTGTAATATAGGCTACT

>D8PAK:00092:00880
CGAGCACTTGTATCGTAGACCACA

>D8PAK:00092:00888
ACAAACAATGTAATGTGTGCCACA

>D8PAK:00092:00893
AAATAGTCTGTGCTCTAGAATACT

>D8PAK:00093:00890
TTATGCAACGTAGTCTAGGTTACT

>D8PAK:00093:00897
TTATAGATTGTGACCCTCGTCACA

>D8PAK:00094:00861
CCCGTAATTGTAACGCAACATACC

>D8PAK:00094:00887
AAGGCATTTGTATCCCCTGATACA

>D8PAK:00095:00866
TTCCAATATGTATGTCAGACTACA

>D8PAK:00095:00870
TTGTATTCCACGATACATATGTGC

>D8PAK:00095:00877
TTGTACCATGCGATACATTCTTAG

>D8PAK:00095:00893
CTTACGTTAGTAGCCTAGCACACT

>D8PAK:00096:00867
TTGTGTCCCAGCGTACATTTGGAT

>D8PAK:00096:00881
TTTCCGTTTGTGCCCTGGCATTCA

>D8PAK:00096:00886
GCATCGATAGTATTCTACACTACA

>D8PAK:00096:00891
CGTTTAATCGTGGCCTATCATACT

>D8PAK:00097:00888
TGTTTTAATTGTATTGTACAATAC

>D8PAK:00098:00859
CTGTAGACTGTATTTTGAGATACA

>D8PAK:00098:00868
AATCACTTTGTGCCTTGGGTTACA

>D8PAK:00098:00886
TCATAGATTGTATGCCAGGCCACT

>D8PAK:00099:00882
CATTGTGTCCTGTCATACATTGCT

>D8PAK:00099:00883
GTGTTTGTGTTTTACCTTACAATT

>D8PAK:00099:00898
ATTGACTTTGTATCGAAGTCACAA

>D8PAK:00078:00900
ATTTAGATTGTAGCTGGTCTTACA

>D8PAK:00081:00903
AACTCATTTGTAGCGGAGAATACA

>D8PAK:00082:00901
GTAAAGATTGTGGCCTACAATGCA

>D8PAK:00085:00904
CACTGTAACCCAGCCCACACTTAT

>D8PAK:00085:00907
GGGCTTAATGTATTTTAGCCTACA

>D8PAK:00085:00916
AAGCAAACTGTGCGCTAGGTCACA

>D8PAK:00086:00917
AGCCATACTGTAGCCTGGAATACC

>D8PAK:00088:00905
CTCCCAAAAGTATGCCAATACACA

>D8PAK:00088:00913
TTGTATCCTATAACACAATTTTAA

>D8PAK:00088:00917
AAAACGAATGTGGCCTGGCTCACA

>D8PAK:00091:00923
GTCTTCACTGTGGCGTAGGGCACA

>D8PAK:00093:00906
AATTAGAATGTACGCTATCCTACA

>D8PAK:00093:00911
TTGTTTATTGTATCCTTAAATACA

>D8PAK:00093:00917
CCCTATTTGTATGCCAAGCTACAA

>D8PAK:00093:00923
TCAAAAATTCCATCCATTCGCTCA

>D8PAK:00094:00912
AAGAACATTGTAATCTGGCGTACT

>D8PAK:00094:00932
TTCACGATTGTCATTCGGAACACA

>D8PAK:00095:00930
TTGTAGTCCAGGGCACACTTTTAA

>D8PAK:00096:00917
CCGAATGTATGCTGGGTTACACAT

>D8PAK:00096:00931
CCCACAATAGTAACCTGCCTTACA

>D8PAK:00097:00906
ATAACACCTGTAATCCAGACTACA

>D8PAK:00097:00921
TGTATTGTAGGATACAGTTTTACT

>D8PAK:00098:00901
ATCGCATTTGTATTCCAATATACA

>D8PAK:00098:00908
CTATTATTAGTAGGCCGTAATACA

>D8PAK:00098:00912
TTCTGAATTGTGTTCTGTCCCACT

>D8PAK:00098:00918
AGATTGACTGTATCCCGGCTCACA

>D8PAK:00098:00926
GCACACACTGTATTGCGGGGCACA

>D8PAK:00098:00930
CCACGAATTGTATTACGCCCCACA

>D8PAK:00099:00901
TACTAACTTGTATCGTACCTTACA

>D8PAK:00099:00903
TCTCGACTGTAATCTGGCTCACAA

>D8PAK:00099:00918
AGAGCACCCGCATCCGCTCTCCCG

>D8PAK:00099:00941
TTATCATTTGTGCTTTGCGTTACA

>D8PAK:00099:00945
CATGTAATTGTGATACGCGCTACT

>D8PAK:00100:00048
GAGAATGTATTCCAAATTACATTG

>D8PAK:00101:00038
ATAAGGATTGTGTCTCTCCATACA

>D8PAK:00102:00022
CTACTGATTGTAGTCCTGCGCACA

>D8PAK:00102:00029
CTATTAACTGTATCTCGGGATACA

>D8PAK:00103:00017
CCCTCGTTTGTATCCTAGCTTACC

>D8PAK:00103:00024
ACTCCGTTTGTATTCCACCTTACA

>D8PAK:00103:00032
ATCAAATGTAACCTGAGATACAAT

>D8PAK:00103:00045
CTCGAATTGTGGGCCTACGTACAA

>D8PAK:00104:00039
TTGTATTCAGTGATACATTTTTCT

>D8PAK:00104:00041
TACTGAATTGCGACCTCCCATACA

>D8PAK:00105:00033
CAATTCTTGTAGCCTGGCGTACAT

>D8PAK:00105:00047
TTTACAAATGTATTTGGTCTTACA

>D8PAK:00106:00026
AGAGAATTGTATCCTATCCCACAA

>D8PAK:00107:00020
ATTGAGTTTGTACGCAGCATTACA

>D8PAK:00108:00034
CCTCGATTGTGTTCTGGCCCACAT

>D8PAK:00108:00046
TTGTAGCCCCGCACACAATGCCTA

>D8PAK:00109:00014
AATACTGTATTTCAGGACACAATC

>D8PAK:00110:00042
GTTAGACTGTAGTCTGTAATACAC

>D8PAK:00111:00028
TTTTAAATCGTATGTACGACTACA

>D8PAK:00111:00029
GTAACATTGTAATATGACGCTACA

>D8PAK:00111:00047
GCTAATTGTGACCCAAGATACTAC

>D8PAK:00112:00013
TAAATTGTGCCCCCGGACACAGTG

>D8PAK:00112:00022
TTACGAATAGTAGCCCTGATCACA

>D8PAK:00112:00041
ATCACAATTGTATCCGATGCCACA

>D8PAK:00112:00044
CTATATCATTCATCCGGCGCACTG

>D8PAK:00113:00008
TTTAGGCTATCATCCGTTGCTATG

>D8PAK:00114:00022
TAGTCCTTTGTATGCCTGCATACA

>D8PAK:00114:00034
TTTGAGAAAGTAATCTGGCCTACT

>D8PAK:00115:00014
AGAACGTTTGTAGCCGACAGCACA

>D8PAK:00115:00024
AACTTAACTGTGTCTCATAACACA

>D8PAK:00116:00025
CCCTTTAATTCATCCTTCATAGTC

>D8PAK:00116:00026
TATTGGTTTGTATTGTAAAGTACA

>D8PAK:00117:00004
GTAGTGATTGTAACCCACACTACG

>D8PAK:00117:00016
CAGTGAATTGTATCTTCGGTCACA

>D8PAK:00117:00022
AGTTCAAATGTAGCCCATCCTACA

>D8PAK:00117:00044
GGGTGGATTGTGCCCCCGATTACA

>D8PAK:00118:00010
TCTAAGATTGTATCCCCAATTACA

>D8PAK:00118:00034
TAACGTTTGGTAGGCTGGACTACA

>D8PAK:00119:00004
GGTTTAACTGTATGATAGCTCACA

>D8PAK:00119:00042
CAGACAAATGTATTCAGTAACACA

>D8PAK:00120:00034
ATTAAAACTGTAATTCGGATTACA

>D8PAK:00120:00042
GCCACAATTGTACCCCAGAGTACC

>D8PAK:00122:00038
CCAAGATTGTGTCCCTCACTACAT

>D8PAK:00125:00049
GCCCCTTTGTAGTGCGTCTTACAT

>D8PAK:00126:00013
TTAACAATTGTGGTTGGGGCTACA

>D8PAK:00127:00010
ACCTCAATTGTACCCTGTGGCACA

>D8PAK:00127:00049
GGCACGAATGTATCGTCGCCTACA

>D8PAK:00128:00045
AACTTCTCGCTCATCCTATCAGAC

>D8PAK:00129:00044
ACACTGTAGTCTAGCATACATTCT

>D8PAK:00130:00030
GACAATTTTGTGAACTGGCGTACA

>D8PAK:00130:00032
ACTACCACTGTACGCTAAGATACA

>D8PAK:00133:00035
GCATCGAATGTATTGTCGATTACA

>D8PAK:00135:00011
TTGTAGTCTGTCATACACTGATTA

>D8PAK:00135:00030
CTGTAAGCTACGATACAATGTAAA

>D8PAK:00135:00047
AAGACCGGTCATCCGACTACTAAA

>D8PAK:00136:00009
TTTTTTTCTGTAACGTAGGTCACA

>D8PAK:00136:00045
TCTGACGTTCATCCAGAGGCAGGC

>D8PAK:00137:00008
CCAATTCGTGTATCCTAGCCTACA

>D8PAK:00137:00013
AACCACTTTGTAAGCAAGCCCACA

>D8PAK:00137:00026
ACAAAATGAACATCCGTAGAGATT

>D8PAK:00138:00038
TCTACAATTGTGGGTTACAATACA

>D8PAK:00138:00049
TTGTATTCCTGAGTACAATTAAAC

>D8PAK:00139:00014
TTCTATTTTGTATTCCATCGTACA

>D8PAK:00139:00018
CTTCAAACTGTAACGTACAACACT

>D8PAK:00139:00043
TCGATAAACGTGTGCTGTACTACA

>D8PAK:00140:00008
TTTTGCTTTGTGTTGTACACTACA

>D8PAK:00140:00016
ATCATGCACTCATCCGGACTACCT

>D8PAK:00140:00018
AAGCTGTTCGTATCCTGGAATACA

>D8PAK:00141:00014
CCCAGTTTGTAGTACAGCATACAA

>D8PAK:00141:00027
CACTAGATTGTATGCGCGGTTACG

>D8PAK:00141:00036
CGTTCTAATGTATGCTGTGCCACA

>D8PAK:00141:00047
TAGACTGTGGGCTACGCTACAGAA

>D8PAK:00142:00008
TTGTAGCCCAGACCACAATCTATG

>D8PAK:00142:00013
TCGCTGAATGTATCCTAGCATACG

>D8PAK:00142:00029
TTGTAGCGCTGCATACATACTTTA

>D8PAK:00142:00040
ACCCGAACTGTGGTCCACAATACA

>D8PAK:00142:00043
CAAGACAATTGTATTATGAGTTAC

>D8PAK:00144:00033
TAGGATATTGTATGCTAGGTCACT

>D8PAK:00145:00012
AACGCTTACCCATCCCGGCGCCCC

>D8PAK:00146:00014
ATGTATTCTATGTCACATTCACAT

>D8PAK:00147:00040
ACATGGATTGTAGGATACGATACA

>D8PAK:00148:00044
CCCGAAATAGTATTCCGCCATACT

>D8PAK:00100:00070
TCTTAATTTGTGGTTTACGCCACA

>D8PAK:00101:00051
TCTAGGATAGTAGTCTGTAGTACA

>D8PAK:00101:00070
CGTTACTTTGTAGCTTAAGGTACA

>D8PAK:00101:00084
TTTGAAATTGTGGCGTACGACACA

>D8PAK:00101:00092
TTCGCCATTGTATGCCACCCCACA

>D8PAK:00102:00080
TTACATTGTAGTTTCGGATACAAT

>D8PAK:00105:00079
CATAAGATTGTGCTGTCGCCCACA

>D8PAK:00106:00096
ACGACAATTGTAGTCTGCACCACA

>D8PAK:00107:00082
GCAGAGATTGTAATCCGGAATACG

>D8PAK:00108:00075
AGTCCGATTGTAGTCCCGGTCACT

>D8PAK:00109:00052
GATCCATTTGTACTCCCAATTACA

>D8PAK:00111:00054
CGCTATAACCCATCCGTAGCTACA

>D8PAK:00111:00056
TCAGGGATTGTATTGCAGCCCACT

>D8PAK:00111:00084
TTGTATCCTAGCCTACCAAGCACT

>D8PAK:00113:00054
ACATGGATTGTACGCAAGACTACA

>D8PAK:00113:00071
GTAGACTTTGTACCGTGGCTTACA

>D8PAK:00113:00095
AACCACAATGTGTCATGGACTACT

>D8PAK:00117:00070
TATGAGATTGTATCCACGACCACT

>D8PAK:00117:00072
TTCTCTATTGTATTACAGACTACT

>D8PAK:00118:00052
TCCCTGATTGTGGGCTGTAGCACA

>D8PAK:00120:00052
TCTCACACTGTGTCTCGAGTCACA

>D8PAK:00122:00078
TTTATTACTGTGTCCCAAGACACA

>D8PAK:00122:00083
AAAAAGATAGTAGTCGCGAACACA

>D8PAK:00123:00092
TCTCCATTTGTATCCTGAAGCACA

>D8PAK:00124:00069
GCGATTGTATCGCTCGTTACAATT

>D8PAK:00124:00070
GCCTAGAACGTGTCCTAGAATACA

>D8PAK:00125:00095
GACTTGTTTGTATCTCAGCGCACA

>D8PAK:00126:00056
GGTGAAACGTGTTCTAGCATACAG

>D8PAK:00126:00059
AATAAGTGTAGCCCTGCGTACAAA

>D8PAK:00126:00084
CTCAGATTTGTATTCTGGCTCACA

>D8PAK:00127:00052
TTGTAGCTAGGCATACAGTAAACA

>D8PAK:00127:00072
GGATTTAATGTAAGATACGCTACA

>D8PAK:00128:00084
AAGTAAAACGTAGCCCATGCTACT

>D8PAK:00128:00092
ATCACCAATGTGTCCCCGAATACA

>D8PAK:00129:00066
AATTAATTTGTATTCTAAGATACA

>D8PAK:00129:00067
GTACGGATTGTGGTATAGGATACA

>D8PAK:00129:00093
ATTTGAACTGTGCTCTGGCATATT

>D8PAK:00130:00070
AGAAGAATTGTAGCCTGGCGTACC

>D8PAK:00130:00090
ATGTGTCGCAGGTTACAAAGTAGC

>D8PAK:00131:00055
TTGTGTCTCCCACTACAATGTCCG

>D8PAK:00131:00067
TCCCGATTGTATTGTATCCTACAA

>D8PAK:00132:00098
TAGTGGATTGTATCTCAGCATACT

>D8PAK:00133:00085
AAGTAGATTGTATGCTACCCCACA

>D8PAK:00133:00090
TGGGACATTGTGTCCCCCGATACA

>D8PAK:00134:00086
TACTGAAACGTAAGCTACAACACA

>D8PAK:00134:00090
ACATATTTTGTGCTCTGAGCTACT

>D8PAK:00134:00094
ATGTATATTGTAGTCTGGGGCACT

>D8PAK:00136:00065
CAGGATATTGTAGCCCCCCTTACA

>D8PAK:00138:00054
CGCGAAATTGTAACCTGCAATACA

>D8PAK:00138:00073
TTGTAGCGCCGGCTACAGTCCATG

>D8PAK:00138:00079
ATATAAACTGTCATGTGGACTACA

>D8PAK:00138:00089
TGTCTGTATGTATTCTAGAATACA

>D8PAK:00139:00092
GATATAATTGTAGCTTCTAATACA

>D8PAK:00140:00077
CTGTGGCCTGGCATACAAAATCTG

>D8PAK:00141:00064
CCAGAAACTGTGTCCCTCATCACA

>D8PAK:00142:00061
TATCACACTGTGCCCTAACGCACA

>D8PAK:00145:00072
ATCTTAAAAGTAGTCCCGAATACG

>D8PAK:00145:00082
TTAATTGTGCCTGCGGATACAATT

>D8PAK:00145:00089
AATTCATCTGTATTCCTCGCTACA

>D8PAK:00146:00081
AAATTGTAGTGTCCTAATACTAAG

>D8PAK:00146:00095
GGACTAATTGTGTCCCAGACTACA

>D8PAK:00146:00097
GCGACTGTATTCTGAGTCACAATC

>D8PAK:00147:00064
TCAGCGAATGTGGTCTCGGTCACA

>D8PAK:00148:00091
TTCAAAGTGTGCCCCACAATACAA

>D8PAK:00149:00056
CTCACGATTGTATTCTGAGGTACT

>D8PAK:00149:00078
AGGATTGTGCTCTGCAATACGTTC

>D8PAK:00100:00123
ATCCCAAATGTGATCTGAAATACA

>D8PAK:00100:00131
GTCGGAAATGTAACATGGAACACT

>D8PAK:00101:00100
TTGTAGTTCAGCACACAGTCTACA

>D8PAK:00103:00100
GACGTATTTGTGTCCCACCTCACA

>D8PAK:00103:00110
ATGTAAGCCACGCTACAATTACTT

>D8PAK:00103:00140
GATAAATCTGTACGCCTGCCTACA

>D8PAK:00104:00129
ATTCAAGACTCATCCGGCAGTGGA

>D8PAK:00105:00133
TAAGAATATGTAGCCTGGGACACA

>D8PAK:00105:00140
AATACGAATTGTATGTCCCGATAC

>D8PAK:00106:00121
GCGTTAATTGTGGTTGGGATCACA

>D8PAK:00106:00135
TACGAATTTGTGATCTCCAACACA

>D8PAK:00107:00101
ACGGAGATTGTATCCTGGGCAACA

>D8PAK:00107:00116
CCTAAGATTGTAGCTGCCATTACA

>D8PAK:00107:00129
GAAATTGTAACGTAACCTACAATG

>D8PAK:00107:00140
GAGGAATCTGTGTGCTAGCGTACA

>D8PAK:00108:00117
AAAGTAATTGTGTTCTAACTCACA

>D8PAK:00108:00133
AAATCAATTGTATCGGTCAGTACA

>D8PAK:00108:00146
AACTAAATTGTATGCCGTAGTACC

>D8PAK:00109:00105
CCGGGGATTGTCATCCAGCATACA

>D8PAK:00111:00103
TTTGAAATGTGGTCTGGCGCACAA

>D8PAK:00111:00110
TTGTATGCTCCACTACAAAGGTGA

>D8PAK:00111:00119
CCGGAGATTGTGTCCCGGGACACG

>D8PAK:00111:00122
TTTCGAAGTGCATCCCGGAATACA

>D8PAK:00111:00146
TGACAAATTGTGTCCTGGATCACT

>D8PAK:00112:00146
CTCACGAACGTACTCTCGGATACA

>D8PAK:00112:00147
CGCAGATTGTGATTCACCATACAC

>D8PAK:00113:00118
AGTGTCGCTTCATCCGAAATAATG

>D8PAK:00114:00132
GTCTGAATTGTAATACCCATCACA

>D8PAK:00114:00137
AACACAATTGTAAGAGGGATTACA

>D8PAK:00115:00114
CTGTATTGCAACATACATTCTGAC

>D8PAK:00115:00119
CCCCTCATTGCATCCCTACTCTAC

>D8PAK:00116:00149
CCTTTGATTGTAACCGGGACCACG

>D8PAK:00117:00125
GTATGATTTGTATCCACCGCTACA

>D8PAK:00117:00139
TTGTAAGCAGGCATACAGTATCGA

>D8PAK:00118:00120
CCTAAACTTGTATTCCGCAATACT

>D8PAK:00119:00117
GCTTAGATTGTATGCATGGCTACA

>D8PAK:00120:00137
AAGTTTTGATCATCCGCTACATAT

>D8PAK:00120:00138
TGGAAAATTGTGACCAGAACCACT

>D8PAK:00120:00145
TTTATTGTGCCTTGCGCTACAAAT

>D8PAK:00121:00110
ATGCGGTTTGTATTCGAGGGTACA

>D8PAK:00122:00104
GCGACAATGTAACATAGAATACAG

>D8PAK:00122:00127
ATTTGCAATGTAGCCTGTATTACT

>D8PAK:00122:00132
AAAAATTCATCATCCCGGGTCCAG

>D8PAK:00122:00133
GGCGAATTGTGATCGGGATTACAA

>D8PAK:00123:00104
GGAACTGTAAGCTAGGATACAGAG

>D8PAK:00124:00115
CATCTGACTCCATCCTACTCATCG

>D8PAK:00124:00125
AAATGGATTGTAAGAGGACATACA

>D8PAK:00125:00123
AAGTTTAATGTATTCGGGAATACA

>D8PAK:00125:00133
TGCCCAATAGTATTCCCACTTACA

>D8PAK:00126:00114
CTTCTAATTGTATGCCATGTTACT

>D8PAK:00126:00138
AACAGGATTGTATGCTCCGGCACA

>D8PAK:00126:00146
TCACGAATTGTATCGGGTGTTACA

>D8PAK:00127:00129
ATATCAATTGTATCCCTCACCACA

>D8PAK:00127:00137
GTGTCAATTGTAGCTTTGGATACA

>D8PAK:00128:00103
TTCTAAATTGTAGTTCGAATTACA

>D8PAK:00129:00138
AATAATTTTGTAACCTGTAACACA

>D8PAK:00129:00149
GTCAATTGTAAGTGTGCATACACT

>D8PAK:00130:00116
TAGTATTCCAGACTACATTCAGAC

>D8PAK:00131:00124
TTGTATCCCAAAATACACTTTGTC

>D8PAK:00131:00129
AAGCTAATCGTGCTCTACATTACA

>D8PAK:00133:00105
TTGTAACGCGCATTACAATCTTAA

>D8PAK:00133:00138
GATACGAGTGTAGCCACGGCCACA

>D8PAK:00134:00112
AAGTGTGTAACCTAGACTACAGTT

>D8PAK:00134:00121
TTCTGAAATGTAGTCCATGCTACA

>D8PAK:00135:00133
TCATTTGTGTCATCCAACACAACC

>D8PAK:00136:00119
ACCTAAGTTGTATGCTCAGATACA

>D8PAK:00136:00130
ACACTGAATGTATCGCTGCTTACA

>D8PAK:00137:00107
TTGTATTTTGGGCCACTATTGTAC

>D8PAK:00137:00116
GAATAGTCTGTATTCTGCAGTACA

>D8PAK:00137:00133
CTCTGGTTTGTGACCTGTCCCACA

>D8PAK:00138:00109
CCACCGATTGTATTCCAAGTTACG

>D8PAK:00138:00147
TCCCTAACTGTATTCGGTGATACA

>D8PAK:00141:00103
TCGTTACTTGTATCCTGGCACACA

>D8PAK:00141:00137
TTGTAGGATAGAACACTATTACTG

>D8PAK:00141:00140
CCACCAATTGTGATACGGGCTACA

>D8PAK:00142:00121
ATTGCGAATGTGCCCCAGGCTACA

>D8PAK:00142:00132
TTGTATTCTATAACACATTTTTAT

>D8PAK:00142:00137
AACCCACATCCTATAACACTTCTG

>D8PAK:00142:00138
CCCGAGTTGGTATTCTCGCTTACA

>D8PAK:00142:00143
CCCCTATTTGTAGCGCAGGTTACT

>D8PAK:00143:00126
CGACCCACTCCATCCAGCACCGAT

>D8PAK:00144:00109
TTAAACAATGTATGCCCTCCTACA

>D8PAK:00144:00139
GTTGAATTGTATCCCAACCTACAT

>D8PAK:00145:00109
ACTCATATTGTAGGCTATGTCACA

>D8PAK:00145:00132
CGTAACAAAGTATTATGAGATACA

>D8PAK:00145:00136
CCTAGAAATGTATTCCCTGACACA

>D8PAK:00145:00140
CTTCACCCTGTAACCTGGCATACA

>D8PAK:00145:00146
TTGTATTATCCGCCACAATTCACA

>D8PAK:00146:00109
AATTACTTTGTAACCCATGCTACA

>D8PAK:00146:00149
TCACCAATTGTAACTCTAACTACA

>D8PAK:00147:00133
TCGAGAATTGTGTTCAGCAATACA

>D8PAK:00149:00102
CGTTCAATTGTGTGCCTGGTCACA

>D8PAK:00149:00120
ATGAGAAATGTGTCCTAGGCTTCA

>D8PAK:00100:00178
ACCCCTTTGCCATCCTTTACAAGA

>D8PAK:00100:00199
TAAGTTTGTAACTGGGCATACACT

>D8PAK:00101:00151
TAGTCATTTGTATTGCTGAGCACA

>D8PAK:00101:00182
ATAATTTCTGTGGTCCAACTTACA

>D8PAK:00102:00152
TTGTAGCCTGCGTCACATTGCCAA

>D8PAK:00102:00191
TACTAGTTAGTAGTCCTGAGTACA

>D8PAK:00102:00192
CTCAAAACTGTATCGTGAACTACT

>D8PAK:00103:00150
TTCTGTATTCCATCCTACATCTAC

>D8PAK:00103:00163
CCTTGCGGCCCATCCGTTCATACA

>D8PAK:00103:00195
AGCCTTTTTGTATTCGAGGCCACA

>D8PAK:00104:00156
TAATTGTGGTCTGCGCTACAATAA

>D8PAK:00105:00163
ACCCGGATTGTGATCCAGACCCCA

>D8PAK:00105:00193
CTTGAAACTGTATCACGGCACACA

>D8PAK:00105:00196
AAACAATTTGTAGCCAGGGACACT

>D8PAK:00105:00199
ACCGTGATTGTGGGCTGAGCTACC

>D8PAK:00106:00176
GTACACCCGACATCCGCCTATCGC

>D8PAK:00106:00178
TTCACCCTTGTATGCTAAGTCACA

>D8PAK:00107:00164
GAGCGGATTGTAATCCAGGGTACT

>D8PAK:00107:00199
ACATTAACTGTATGTTGCGATACA

>D8PAK:00108:00160
TCTCAGATTGTGCATTAGAGCACT

>D8PAK:00108:00167
TGTTGAAATGTGTTCTATCGTACG

>D8PAK:00109:00154
ACGTTCTAACCATCCGGTGCGCAG

>D8PAK:00109:00175
TTGTATGCCCTGATACAATTTGAC

>D8PAK:00109:00195
TTAAACATTGTAGCCGAGGTTACT

>D8PAK:00111:00152
ACACTGCTAACATCCTATATCGAC

>D8PAK:00111:00168
ACGACTATTGTATGTTGGCTTACT

>D8PAK:00111:00172
CGAACATTGTATGCTGTGGCACTA

>D8PAK:00111:00188
TTGTATTCTACGGTACAAACGTTA

>D8PAK:00112:00152
TTGTATGCTAGCCTACAATCAACA

>D8PAK:00112:00169
GTTAAGTCTGTAGTCTAAGACACA

>D8PAK:00112:00172
ACTCGAATTGTGGCCGCGACTACA

>D8PAK:00112:00180
CCTTGCGCTGCATCCCTGCTAGAG

>D8PAK:00112:00192
ACTGCGAGTGTAATGTAGAATACG

>D8PAK:00113:00183
CAAGAAAATGTGTGCTATCATACA

>D8PAK:00114:00151
AAGCCTTTGTGCCCTGCACCACAA

>D8PAK:00114:00152
TTCTCAATAGTATTACCCGATACA

>D8PAK:00114:00157
AACCCGCATCCGAACAAATACTCT

>D8PAK:00114:00160
GGCAAGACTGTCATCCCGTGCACA

>D8PAK:00116:00163
AACGATCTTGTATCCTGAGATACA

>D8PAK:00116:00171
GAAAAACTTGTATCGACGGCTACA

>D8PAK:00116:00184
ATGTATTCCATCATACAATCTATG

>D8PAK:00116:00196
TTTCAAACAGTGGTTTAGAATACA

>D8PAK:00117:00155
ACCTAGAATGTATTCGGTCTTACA

>D8PAK:00117:00160
TCTTACTCTGTATGCTATGATACA

>D8PAK:00117:00179
GTGTATCTTAGCATACATTCCCCG

>D8PAK:00117:00193
AAGTTTGTGACGTAGACTACATAC

>D8PAK:00118:00161
GCACGATTGTATGCTGGACTAAAT

>D8PAK:00118:00169
CAACATTGTATCATGGGCTACACC

>D8PAK:00118:00187
AAGTGAGTGTATCTAGCCCGCACA

>D8PAK:00118:00188
AATGAGATTGTATTCTAGGACGCA

>D8PAK:00118:00196
AAAGTGATTGAGTGCTGCAATACA

>D8PAK:00119:00153
CGCATTAGCACATCCAGGACTTCG

>D8PAK:00119:00155
GTCCAACTGTAACTTAGCATACAT

>D8PAK:00119:00156
TGTGTTTTTGTAGCCTGGGCTACA

>D8PAK:00120:00194
CAGCGAAAGGTATCTTGCGCTACG

>D8PAK:00121:00152
GGATTCTTTGTAACGCCTACTACA

>D8PAK:00121:00165
TTGTTGCCCATCCTACACTTTTCC

>D8PAK:00121:00166
ATATCGAATGTGACCCTGACTACA

>D8PAK:00121:00182
TCCTATATTGTATTGTGTGGCACA

>D8PAK:00121:00189
GGAAGAATGTGACCTGTAATACAA

>D8PAK:00122:00151
TTATCAATTGTGGGACAGCGTACA

>D8PAK:00122:00159
GTCCGATTGTGACCTTGAATACAT

>D8PAK:00122:00165
TGATTGATTGTATGCTAGGCCTAG

>D8PAK:00122:00168
CATTAATATGTAACGTAGACCACA

>D8PAK:00122:00197
AAGAAGATTGTCCCTTAGGCTACA

>D8PAK:00122:00199
TACAAACCTGTAGTCCAACCCACA

>D8PAK:00123:00163
ATAAACATTGTGTCTCCTCATACA

>D8PAK:00123:00181
AATAGAATAGTATGCTAGAATACT

>D8PAK:00124:00162
CAAAAACATGTAGCATGGAACACA

>D8PAK:00125:00160
ATCTGAATTGTATCTCGCACCACT

>D8PAK:00125:00161
AAATTGTAGCCCTGAATACTTTTA

>D8PAK:00125:00179
TCTTGGATAGTGACTTAGACCACA

>D8PAK:00125:00188
ACGTACTTTGTAGGATACGATACT

>D8PAK:00126:00176
TTGTAGATTGTAATTTGTGCTACT

>D8PAK:00126:00197
CTGTATGCTAGCATACCATCTGCT

>D8PAK:00127:00159
CACACGAATGGTATCCCACAATAC

>D8PAK:00127:00178
AGCGTTTTCCCATCCATACCCTAA

>D8PAK:00127:00185
AAGCGAATAGTGTTCTAGAATACG

>D8PAK:00132:00154
GACAAAAAAGTAGGCCACCATACA

>D8PAK:00133:00188
CTCACGATTGTAGCCTGAGCCTAC

>D8PAK:00134:00195
ACGGTATTTGTAACCCAGGCTACG

>D8PAK:00135:00175
CTTTTTAGTGTAATCTGGAATACA

>D8PAK:00135:00176
TCACAAATTGTATCCTGTAATGCT

>D8PAK:00136:00153
CTGTGGCCTAGCTTACAATTCACC

>D8PAK:00136:00165
TTTTTGAATTGTATCTCAGACTCC

>D8PAK:00136:00181
TTGTGTCCCACGATACATTTTTGG

>D8PAK:00137:00151
CTTTATATTGTACGGCTGAATACA

>D8PAK:00138:00151
TAAAAGTAGCGTACACTACAATTG

>D8PAK:00138:00153
CTTTAAATTGTGCTCCAACGTACA

>D8PAK:00138:00154
TAGTAATTGTGTTGCGCCATACAA

>D8PAK:00138:00182
TACTCATTGTGCTCCAAACTACAG

>D8PAK:00138:00184
TTGTATGCGGGATTACTATCCACC

>D8PAK:00139:00181
TTGTAGCTCATACTACAGTCCTTG

>D8PAK:00139:00199
TACGCAATTGTGACCTTGCCTACA

>D8PAK:00140:00156
AGACAGATTGTATGTCCGAATACA

>D8PAK:00140:00165
TTGTATTCGAGCATACAATCGATT

>D8PAK:00140:00178
CATAGGAAATGTACCGCAGCATAC

>D8PAK:00141:00166
ACGATAATTGTATCCCAGCCTACC

>D8PAK:00141:00170
ATAAGGTTTGTGTTCTACATTACT

>D8PAK:00141:00181
AATTGTGTATTCCGGCTTACAAAC

>D8PAK:00143:00152
TTGTGACCCACATTACATTTAGTG

>D8PAK:00143:00160
GAGCAGATTGTATGCCAGTTCACA

>D8PAK:00143:00193
AACCTCATTGTATTTCAGGACACT

>D8PAK:00144:00151
CCGTACATTGTAGCACAGATTACT

>D8PAK:00144:00176
TTATCGAATGTATCCTAGAATCCA

>D8PAK:00145:00175
CTGTAGCCTATGTCACAGTCAGTA

>D8PAK:00145:00179
TTGTATGCTAGCTTACACTATTGC

>D8PAK:00145:00198
AGCCTGATTGTATCCCCAACTACA

>D8PAK:00146:00156
AATCCAAATGTAACGTCCAATACA

>D8PAK:00147:00154
TTCTAAAATGTGCCCCAGGCTACT

>D8PAK:00147:00163
CGAATAATTGTGGTCTGAGATACA

>D8PAK:00147:00192
TATTCAGATTGTGGTTTGGATCAC

>D8PAK:00148:00150
GCGCGATTTGTGCTATAGGCCACA

>D8PAK:00148:00151
GCTTTTGCTGCATCCACTGGTCTG

>D8PAK:00148:00185
AGTTAAATTGTATTCCTGGCTACC

>D8PAK:00149:00164
CATCTGATTGTATTCCGTACCACT

>D8PAK:00149:00172
TTGTGACCTGAGTCACTGTTTGTC

>D8PAK:00149:00184
AGCGCGGAATCATCCGTACGCCCA

>D8PAK:00149:00187
AAAATACTGTAACCTAAGATACAA

>D8PAK:00100:00211
CATAAGATTGGGTTCTGGCTCACA

>D8PAK:00100:00213
ACGCAAATGTGTCCTGGCCTACTA

>D8PAK:00100:00225
TTGTAGTCGGTGCCACAATCCGAT

>D8PAK:00101:00226
TTGTGATCCACCATACAATCTTCG

>D8PAK:00101:00232
CACGAGATTGTACTATACGATACA

>D8PAK:00101:00233
GGTAAAACGTGTCCCAGATTACAA

>D8PAK:00102:00229
CTTAAAACTGTACTCCGTATTACA

>D8PAK:00103:00232
CAGCACCCTGTATGCTGCGCCACA

>D8PAK:00103:00243
GATTGTTTGTGGCCTGGCATACAG

>D8PAK:00104:00209
CAGCGGATCGTGCCCTAGGCCACT

>D8PAK:00104:00246
GCGTCTGTTTGTGATCTATGCTAC

>D8PAK:00105:00238
ATATCAATTGTATGCCCCGATACA

>D8PAK:00106:00223
TTGTACCCTAAATTACAATTCCAG

>D8PAK:00106:00248
AAATAAGCTGTATTGTGTAGCACA

>D8PAK:00106:00249
ATTTTTGTATGCGGGATTACATTC

>D8PAK:00107:00212
CATTCCTTTGTAAGCCAGATTACA

>D8PAK:00107:00232
TCAAGAATTGTGACCCAAACTACG

>D8PAK:00107:00245
AACAAGATTGTATCTTAGAATACA

>D8PAK:00108:00213
TTCCAAATTGTGAGCTATAATACT

>D8PAK:00108:00238
AGGTTGATTGTAGGCTACACAACA

>D8PAK:00108:00245
CTGTATCGCACGATACAAATGTTG

>D8PAK:00110:00219
GAAAGACTGTATGTTAAACTACAC

>D8PAK:00110:00234
CTGTGATCTGGATTACAATTTTCA

>D8PAK:00111:00225
AATCTAAATGTATCCCAGGTGACA

>D8PAK:00111:00246
TACTTTGTAAGCCGCGTTACAATT

>D8PAK:00112:00209
CACAAGAAAGTATCCCTTATTACA

>D8PAK:00112:00220
CACGGATTTGTAATCTGGCAGACA

>D8PAK:00112:00235
AGGGAATTGTGATCTGAGCTACAC

>D8PAK:00113:00245
GTCCCTTTTGTAGTTTGGATTACA

>D8PAK:00113:00248
TGTTTGTATCCCAGACTACATTAC

>D8PAK:00114:00210
AGGTAGATTGTATGCTAACTCACA

>D8PAK:00115:00221
ACGGCAAAAGTATCCCCTAATACA

>D8PAK:00115:00238
AGAAACATTGTGACTTCGACCACA

>D8PAK:00116:00205
TTTTTGTTAGTATGCTGGGATACG

>D8PAK:00117:00208
GAATAATTTGTATTCCCCGTCACT

>D8PAK:00117:00220
CAAGCGATTGTATCTTGCTACACA

>D8PAK:00118:00245
CATCGAATTGTAGTGTAATGCACT

>D8PAK:00119:00204
TTTGGCTTTGTAGCCCGACCTACA

>D8PAK:00119:00208
TTGTGCTGCGTGTTACAATTTAGT

>D8PAK:00119:00242
GCGAAAATAGTAGCCCCGCCTACA

>D8PAK:00120:00207
ATCCAAACTGTATTACGCGACACA

>D8PAK:00120:00224
GTAACTGTATTCCAGGTTACAATT

>D8PAK:00120:00243
TTTTGGATTGTATCCGCAACTACT

>D8PAK:00121:00225
TTGTATGCTACGCTACACTACGGT

>D8PAK:00121:00242
ATGTGTGACCTGCACCACAATTTA

>D8PAK:00122:00213
CAAATTGTAATCTATGCTACAAAG

>D8PAK:00123:00202
TTGTAACCTAGGCAACAATTGCTA

>D8PAK:00123:00204
TTGTCAATCGTGCACTGTACCACA

>D8PAK:00123:00223
TGAATCATTGTGTTCCGTGCCACA

>D8PAK:00123:00224
CTGTATCCCAGGTTACATTCCACC

>D8PAK:00123:00239
ATCGAATTGTATTGTCAACTACAG

>D8PAK:00123:00244
TCCGGGATTGTGACCCAAGACACA

>D8PAK:00124:00202
TTGTGACGTGGACTACATAATCTG

>D8PAK:00124:00203
CACCCAAAAGTATCACAGGATACT

>D8PAK:00124:00220
TAAAAGATAGTAGCCCAGTTCACA

>D8PAK:00125:00236
AACTACTTTGTATTTTGGGTCACA

>D8PAK:00126:00205
TACATCATTGTATGCTACACCACT

>D8PAK:00126:00210
TTTGTAAAAGTATCCGGGATTACA

>D8PAK:00127:00248
GTTTAGATTGTAGCTTAGCACACT

>D8PAK:00128:00248
TTGTGCCCCTGATCACAATTTGTT

>D8PAK:00129:00237
AAATTAAATGTAGCGAGGCATACA

>D8PAK:00130:00219
AAGATGACTGTGTGCTGGCTCACA

>D8PAK:00130:00247
CTCGTGACTGCATCCTACAGCATA

>D8PAK:00132:00200
TAGCAGATTGTGTGCCTGACTACG

>D8PAK:00133:00221
TGCAGGATTGTAGTACCCATTACA

>D8PAK:00133:00233
CTGTATGCCGGACTACAGTTGCTT

>D8PAK:00133:00238
TTTAAGATTGTGGTGTACAATACC

>D8PAK:00134:00203
CAGCGGTTTGTACCCTAGGTCACT

>D8PAK:00135:00240
TATTAAATTGTGACACACAATACA

>D8PAK:00137:00206
TCAAAAGTGCTCTGCGCCACAGTT

>D8PAK:00137:00243
ATCTAGATTGTATTCCAGTGCACA

>D8PAK:00137:00248
TGCACGATTGTATTCTCTAATACT

>D8PAK:00138:00211
TGACACATAGTATGCTAGACTACT

>D8PAK:00138:00231
AATGGATTTGTATTATACGTTACT

>D8PAK:00138:00237
TTCTGAAATGTAGTCTACGCTACA

>D8PAK:00138:00241
GGCCTATTTGTATGATGTAATACA

>D8PAK:00140:00217
CCCGGCATTGTATGCCAAGATACA

>D8PAK:00140:00224
ACACCCATTGTATTCCAGCTGACA

>D8PAK:00140:00230
GTAACTGTATTCCAGGTTACAATT

>D8PAK:00140:00235
CAAAGCTTTGTAACGGAGGCTACA

>D8PAK:00140:00245
TCTAACTTTGTGTCGCAGCATACT

>D8PAK:00142:00205
AAACAGTTTGTATTCTGTAATTCA

>D8PAK:00142:00207
TTGTAGCCTAGGTCACCAAGTTTA

>D8PAK:00142:00221
AACTAAATTGTTACACAGCATACA

>D8PAK:00142:00227
TAGAGCATTGTATTGTGGCTCACA

>D8PAK:00145:00208
AGTCGCCATCCTTGACCCTTTTCT

>D8PAK:00145:00244
GCTTTAAATGTACGCCCTACTACA

>D8PAK:00146:00203
TCCTATGCGCCATCCTCTGGCTTG

>D8PAK:00146:00218
TCTTATTTGTAGTCTGTCATACAA

>D8PAK:00146:00220
TTGTATTCCGTGACACATATGGGC

>D8PAK:00146:00227
TTGGAATTTGTAACGTAGAGTACT

>D8PAK:00146:00240
GCGTCTGTTCCATCCGGGATCCTG

>D8PAK:00146:00241
ACGAGAATGGTATGCTAGTGCACA

>D8PAK:00147:00227
AATGCGATTGTACCCTAGCTTACA

>D8PAK:00147:00237
TTGTACGCTGCGCTACATTATCTC

>D8PAK:00147:00244
AACTGGATTGTAACCTACAGCACG

>D8PAK:00148:00214
TTATTTGTAGGCTATGATACAATC

>D8PAK:00149:00219
TGTCCAATTGTGGCCCCCAGCACA

>D8PAK:00149:00239
GTTAAGTACACATCCGACTGTTTA

>D8PAK:00101:00285
AGTATGATTGTGTGTGGGGATACA

>D8PAK:00102:00256
CATCAAAATGTATCCTGGCTTACT

>D8PAK:00102:00263
TTGACAATTGTACGCTGGATCACC

>D8PAK:00102:00264
GCCTAATCTGTAATCCCCACTACA

>D8PAK:00102:00269
AAACGAATTGTATACTGGCTCACA

>D8PAK:00102:00276
TCAGAAATTGTACTCGTGACACTA

>D8PAK:00102:00283
CAATTGTAATCCGCTAATACGAGT

>D8PAK:00102:00297
CTGTATTCCTCGCCACATTCCATC

>D8PAK:00103:00268
CTAGAACTGTATTCCAGCATACTT

>D8PAK:00103:00271
GACTTATTCGTATGCTAGAATACA

>D8PAK:00104:00292
CTACATGTAACCTAGGATACATTT

>D8PAK:00105:00285
TCCTTGCCATCATCCTCTATTCGG

>D8PAK:00105:00295
CTGAAATTGTGGGCTGGCTTACTA

>D8PAK:00107:00250
TTGTACGCCGCGCCACATTTCGAA

>D8PAK:00107:00252
AGTGAGACTGTGCTTTGCGCTACA

>D8PAK:00107:00262
TTATTTTTGTATGCAGCCATACAT

>D8PAK:00108:00254
TAGTAGATTGTGATCTACAGTACG

>D8PAK:00108:00255
TTCGATCATGTGCTCTGCGATACA

>D8PAK:00109:00272
GAATGGAACGGTAGCCCACAATAC

>D8PAK:00109:00273
TTCATGATTGTGGCCTGGCCCACG

>D8PAK:00109:00283
AATCGGAACGTGTCACGGATTACA

>D8PAK:00110:00253
CTTTGAATTGTAGTGTACATCACA

>D8PAK:00110:00267
TAGAACATTGTACTAAGGAATACA

>D8PAK:00110:00277
TTGAACACTGTACGCTGGATTACA

>D8PAK:00110:00282
AAAAAAAATGTAACGCACCCCACA

>D8PAK:00110:00293
AACGTAATAGTAACGCCAACTACA

>D8PAK:00111:00258
TCTCCAAGTGTATCCCAGCATACT

>D8PAK:00111:00274
CGATATCGGACATCCTGGCAATCC

>D8PAK:00112:00263
CATTAAATTGTGTTCCGACTCACA

>D8PAK:00112:00266
TCCTAAAATGTGCTTCCCGATACA

>D8PAK:00112:00291
TAAAAAAATGTGTCTTATAATACA

>D8PAK:00113:00258
GAAAACTTTGTGTCGCTGGCTACT

>D8PAK:00113:00259
GTTGCAATGTAATCCCGGCTACAA

>D8PAK:00115:00268
CATACTGTATGCCAGACCACATAA

>D8PAK:00116:00279
TTTTCGATTGTACTCTAAAGCACA

>D8PAK:00116:00296
AGCTTATTTGTACCCCGCACTACA

>D8PAK:00116:00297
CTCCAAATTGTGTGCCACGATACT

>D8PAK:00117:00252
GAATTAAATGTATGCCAGGTCACT

>D8PAK:00117:00278
AATTATATTGTAGTACAGGATACA

>D8PAK:00118:00261
TTGTATCCTAGCATCCTATCCTCG

>D8PAK:00118:00268
TAAAACGTATGCCAGTGCACAATT

>D8PAK:00118:00279
AACATTGTGTATCCCAGGCCACAG

>D8PAK:00119:00265
TGTATCCCAGACTACAGTGTCATG

>D8PAK:00119:00266
AAAATGCATCCGCTATCTCGTCCC

>D8PAK:00119:00274
ACCGCGATTGTGCCCTACATTACG

>D8PAK:00119:00280
CGTGGGATCGTACTTTAGCATACA

>D8PAK:00119:00283
ATAGACATTGTATGCCTGCCTACA

>D8PAK:00120:00282
TTCGCAATTGTATTACCAACCACA

>D8PAK:00120:00291
TTAACCTTTGTGGTGTAGCACACA

>D8PAK:00120:00295
TCCACATTTGTATGGTATAACACA

>D8PAK:00121:00278
AATACTTTTGTATTACACCCCACT

>D8PAK:00121:00297
CTTTTTTGTGTGTCTTAAGATACA

>D8PAK:00122:00273
ATCAACACTGTATTCTGCGTTACT

>D8PAK:00122:00283
CCTCCCAGGGCATCCCTTGCCGAA

>D8PAK:00122:00299
GTTAGAATTGTATTAGTGGCCACA

>D8PAK:00123:00290
TTGTATTTCACGTTACATTTCAAC

>D8PAK:00124:00292
TTACACATTGTACTCCAGACTAAC

>D8PAK:00125:00261
AGCAAAATTGTGCCCTGTCCTACA

>D8PAK:00125:00263
CCTCTGAACGTATGTCAGAATACA

>D8PAK:00125:00272
TATCAAATTGTAAGATATAACACA

>D8PAK:00126:00287
ATCCCAATTGTATGACTGCTTACA

>D8PAK:00127:00263
TGACGAACTGTACCCTGGAATACA

>D8PAK:00127:00275
GAATGAATTGTAACGGGACCTACA

>D8PAK:00128:00253
GAACAGAATGTAAGTTGGCTTACT

>D8PAK:00128:00268
AAGACGACTGTGGTCCGGATCACA

>D8PAK:00129:00257
ATTCTGTTTGTAGTGCAACGCACA

>D8PAK:00129:00260
TGTGAGAATGTGGGCCGGGTTACA

>D8PAK:00129:00274
CTAGCAATAGTAGTCCATCATACA

>D8PAK:00129:00280
ACGCCATTTGTATCCCGGCTTACA

>D8PAK:00129:00296
CGTACAATTGTAGCCCATCGTACT

>D8PAK:00129:00297
CCAGTGACTGTGCCTTAAGACACA

>D8PAK:00131:00262
GTGTAGCGTAGAATACATTTCGAT

>D8PAK:00131:00271
GTGATGATTGTATGACCCGATACA

>D8PAK:00131:00284
TTGTATTGCGGGCCACACTTCCTA

>D8PAK:00132:00251
CTTAATTGTGACTCCGGACACACT

>D8PAK:00132:00275
GACTTATTTGTAACCGTCACTACA

>D8PAK:00132:00288
TTGTACTCCAGACCACAATCTCAG

>D8PAK:00132:00295
TTGGACATTGTAGTCCAGAGTGCA

>D8PAK:00133:00253
CCCAAAATTGTAGGCAGGGATCCA

>D8PAK:00133:00259
CTCTCATTAGTATTCTGCACTACA

>D8PAK:00133:00262
ACGTAGATTGTATTCTCGCGTACA

>D8PAK:00134:00267
CTAAACTTTGTGGCAAGCGATACA

>D8PAK:00134:00270
AAACAAAACGTACTCATGACTACA

>D8PAK:00135:00257
AAGAAGTTTGTATCGTGCGTTACA

>D8PAK:00135:00265
CTATTTATTGTATTCTATACCACA

>D8PAK:00135:00273
CAATAGAATGTATTGCAAAGTACA

>D8PAK:00135:00292
CAAGACATTGTATTCCAGACTACT

>D8PAK:00136:00260
ACGTGGATTGTGATGCAACTTACA

>D8PAK:00136:00272
AGTAGAATTGCATCCTAGCGTACA

>D8PAK:00136:00273
AAAAAGTATGTAGTCCGAGTTACA

>D8PAK:00137:00268
AACAATTTGTAACCTGCCTTACGA

>D8PAK:00137:00274
CCCAAGTCTGTGTGCCTGGATACA

>D8PAK:00137:00281
GGACTTAATGTAGCTTCGGTTACA

>D8PAK:00138:00256
TCTTAGAATGTGACCTATCCTACA

>D8PAK:00138:00262
CGCGTGTTTGTAGTACAAGATACA

>D8PAK:00138:00289
GAGCTGTTTGTACTCTACCATACA

>D8PAK:00138:00294
CGGGAATTGTGCCTTCAGACCACT

>D8PAK:00139:00258
TTTTGGATTGTGGCCTGTGATACT

>D8PAK:00139:00264
ATTTTAAATGTGTTGTGTAATACA

>D8PAK:00139:00286
GTTTGTTCTGTATTACAGGTTACA

>D8PAK:00139:00292
TAAGCATTGTGCCCCAGATCACAA

>D8PAK:00139:00295
CAAGCGGATTGTATTGCAAGATAC

>D8PAK:00141:00276
CCCAAAATCGTATCGTGTGTCACA

>D8PAK:00141:00280
CAATGGATTGTATCCAAGCCTACA

>D8PAK:00142:00258
TCTTTTATTGTAATGTACACTACA

>D8PAK:00142:00277
AACTACTTTGTAACCTATAATACT

>D8PAK:00142:00294
CTTCGAACTGTATTTCATACTACA

>D8PAK:00143:00259
GTTTGCACTGTATTCCGAATCACA

>D8PAK:00143:00287
CATCCTTTTGTATGCTGTATCACA

>D8PAK:00144:00251
ATAACAATTGTATGCCAGATTACC

>D8PAK:00144:00277
ACCTACATGGTAGGCTGTGACACA

>D8PAK:00145:00264
CCCTAATTGTATCACACAATACAT

>D8PAK:00145:00292
AACGAATTGTATCTTGGGTTACGA

>D8PAK:00145:00296
TGTCTGATTGTATCCTAGAGTATC

>D8PAK:00146:00271
ATCCTGATTGTGGTCTACGACCCT

>D8PAK:00146:00273
TTCGGCTTTGTGACCCGCACCACA

>D8PAK:00146:00286
TACATAATTGTATGCGGGGATACA

>D8PAK:00147:00271
TTTGTTATTGTGCTCTAAGCCACA

>D8PAK:00147:00295
AGTCATTTTGTATTGCGTACTACA

>D8PAK:00148:00263
ACTTGTCATCCTGTTTGATAAGAA

>D8PAK:00149:00276
ATTTTGTGTGACGTACTACACAAT

>D8PAK:00149:00299
CAATTTGTTGTAGCACGGCATACA

>D8PAK:00100:00341
CTGTGATTGTTCCCTGCAATACAC

>D8PAK:00101:00313
TCTCTAAATGTAAGCTAGGCCACA

>D8PAK:00102:00346
TGCATCTTAGTATCTTGGATTACA

>D8PAK:00103:00301
TATTTGTGTGCCCTGTAATACATT

>D8PAK:00103:00304
ATCTTTGTAGCCCAGACTACAGGA

>D8PAK:00103:00320
GATTTTATTGTGACCAGGCATACT

>D8PAK:00103:00332
AAAACGAATGTAAGCCAGAGTACA

>D8PAK:00103:00338
ACTAGAATTGTATCCTAGTTTACA

>D8PAK:00104:00306
TCTTACATTGCATCCTACGAAGGG

>D8PAK:00104:00309
TTGTGCTCTGGCCCACTTTTTGCC

>D8PAK:00104:00322
ATGTAATCTAGCATACAGTTACTC

>D8PAK:00105:00321
ATAGCGACTGTATTTCACGCTACT

>D8PAK:00105:00328
TTGTATTCCAGACTACGCTGGGCT

>D8PAK:00106:00307
AATCGAACTGTAGCGCAGCGCACA

>D8PAK:00106:00312
TATTACACCGTAGTCCCGGATACA

>D8PAK:00106:00333
TTTTTGATCGTAGTGTACACTACA

>D8PAK:00107:00304
TGTCTTTGTATGCTGCGCTACTAA

>D8PAK:00107:00316
TACTCAATTGTGTCGCAGGTTACG

>D8PAK:00107:00332
AAGGTACGTATGTATCACAGCTAG

>D8PAK:00108:00303
GTAATGATTGTAGCTTAAGCTACT

>D8PAK:00108:00304
TTGTATTGCAGCATACAAAGGCCT

>D8PAK:00109:00330
GATGACAATTGTATCTGAACGACT

>D8PAK:00110:00306
TTGTATTCTGGATCACAGTTTAAT

>D8PAK:00110:00308
GTAGAGATTGTGTCCCATGATACA

>D8PAK:00110:00327
TTGTAGCCTGGAATTACATTGTCA

>D8PAK:00110:00340
CTGTAGCCTAGCATACTTATTTTC

>D8PAK:00111:00317
TTTCCGAATAGTAGTCCAGATTAC

>D8PAK:00111:00321
TAAGCAATTGTAATTCACATCACA

>D8PAK:00112:00309
ACCACACTGTGGTCTGTAATACAG

>D8PAK:00112:00318
AAAGCAATTGTACTCTGTAGTACT

>D8PAK:00112:00319
TGACAGATTGTAACTGGCGCTACT

>D8PAK:00112:00329
AACCCGAACTGTAGTCAGGGTCAC

>D8PAK:00112:00339
TCAGAATTTGTATCGCGTGTTACA

>D8PAK:00113:00301
TTGTAACCGGCACTACATTTTTGT

>D8PAK:00114:00303
GAGCAGACTGTATTCCAGCACACC

>D8PAK:00114:00318
GTATAAACTGTAAGCCACAATACA

>D8PAK:00114:00325
GTGTGAATTGTAACCTCAGCCACA

>D8PAK:00114:00340
AACTCATTGTAGGCCAACATACAT

>D8PAK:00115:00304
TTGTAGTCTGGCTCACAATCCTGA

>D8PAK:00115:00338
GTAGAGTTTGTAGCGTGAGCCACA

>D8PAK:00116:00300
ATAAAATTGTATTAGGGCACACAA

>D8PAK:00116:00310
GGTCTAATCGTAAGCTGGAACACA

>D8PAK:00117:00301
ACCCTGACAGCATCCTTTTTGATC

>D8PAK:00117:00309
CGGGAGTTTGTATGCCTAAATACA

>D8PAK:00117:00311
ATAATCTTTGTGGCCCCCCCTACA

>D8PAK:00117:00338
TTGTGATCTGGCCTACAATGACCT

>D8PAK:00117:00343
TGGACTTTTGTAGTCCACGTTACA

>D8PAK:00118:00326
CTCGAAAATGTGTGCTTTGATACA

>D8PAK:00119:00304
GAGAAAATGTATTCCGTCATACAT

>D8PAK:00119:00337
AACAGACTGTATGATAGGCTACAT

>D8PAK:00119:00338
GAGGCATTGTGACCTGGATTACAC

>D8PAK:00119:00342
AAACACAAAGTGATCCCCAATACA

>D8PAK:00120:00310
TTTCCCTTTGTATCTTACCTTACA

>D8PAK:00120:00330
TTGTAATCTGCGTCACTATTTCGA

>D8PAK:00120:00332
ACTATCTTTGTGATGTAAGGCACA

>D8PAK:00121:00304
GCTGAGAATGTATCCTAGACCACA

>D8PAK:00121:00310
CCACAGAATGTGCTCTAAGCCACA

>D8PAK:00121:00317
TAGAAATAGTGCTTTGGGCTACAG

>D8PAK:00121:00325
GCTCTAACTGTATCCCCCGTTACT

>D8PAK:00121:00340
TTTTAATTTGTATCCTAAAATACG

>D8PAK:00122:00314
CAATAAATAGTATCCCCGGATACA

>D8PAK:00122:00327
AATTCATTTGTAACCTGCAATACA

>D8PAK:00122:00329
TTGCCAATGGTATTGCATAATACA

>D8PAK:00122:00341
GGGTCAACTGTATTTAGAGCTACA

>D8PAK:00122:00348
CCTTGATTGTATCGCATAATACAA

>D8PAK:00123:00325
CTCCGGATTGTGACTCTGATTACA

>D8PAK:00123:00337
TACCGAGATTGTATCCGTCATTAC

>D8PAK:00124:00303
AACTCGAATGTATTAAGCGATACA

>D8PAK:00125:00306
AATTTTATTGTGTTCCTGGCTACA

>D8PAK:00125:00345
ATTCCCAGTGTGACCCTCGTTACA

>D8PAK:00126:00332
TTTAAATTGTGTGCTAGACTACGG

>D8PAK:00126:00346
GAATCAAATGTACTCCAGCCTACA

>D8PAK:00127:00301
ATGAATTATGTATGATAGGATACT

>D8PAK:00127:00305
TCTACATTTGTATTCGAGGTTACA

>D8PAK:00129:00306
CCCTACAATGTATCCCACGCCACT

>D8PAK:00129:00309
TTGTAGCCTAGAATACATAAAGTT

>D8PAK:00129:00313
ATGCAACTCTCATCCACTTCGTCT

>D8PAK:00129:00324
GCCTCGTTTGTATTCTGCACCACA

>D8PAK:00129:00340
AATTGAAATGTATCGCAGGTTACA

>D8PAK:00129:00348
TTGTATGCTGACCGACAATTCGTG

>D8PAK:00129:00349
GCGTACTATGTATCCTGCATTACA

>D8PAK:00130:00300
CGTCGCTTTGTAATCTACATTACA

>D8PAK:00132:00303
ACTCACTTTGTATGCTTGACCACA

>D8PAK:00132:00318
CGCTAAACTGTACGCTGTGTTACA

>D8PAK:00132:00320
ATCTGGTGAACATCCATGGCCGAC

>D8PAK:00132:00328
GGTAAAACCCGTAGTCTGCACTAC

>D8PAK:00132:00349
AGTTAGATTGTATTCTAAGGTACG

>D8PAK:00134:00326
GCTGACAATGTATCACACCATACA

>D8PAK:00134:00333
GCCGTACCTGTATGCTGCGATACG

>D8PAK:00134:00339
ATTCGATTTGTAACTTAGACTACA

>D8PAK:00135:00304
CTAGTGACTGTAACCAGGGATACA

>D8PAK:00135:00341
CAGTATGTAGTCCGGCATACTATT

>D8PAK:00135:00344
CTTTAAGAAAGTGATGCAGAATAC

>D8PAK:00136:00330
CTCCTAATTGTAATATGGGACACA

>D8PAK:00136:00342
TTGTGGCCCCTACTACAATCTAGC

>D8PAK:00136:00348
GGCAAATTGTAGCGTAGAATACAG

>D8PAK:00137:00303
AGTTAGATTGTATTCCCTATCACA

>D8PAK:00137:00335
AGCAAGAATGTAACCTACTCCACA

>D8PAK:00138:00301
CCTTCGATTGTGCTCCTTCGTACA

>D8PAK:00138:00302
CGTGGCCTTTGTACTCCAAGCTAC

>D8PAK:00138:00312
TAAGTGTGAGCTGTCATACAATCC

>D8PAK:00138:00325
ATTGTTAGTTCATCCATTGTGAGC

>D8PAK:00138:00332
CGCACTTGTGTATTCCAAATTACA

>D8PAK:00139:00301
ATACTAATTGTAGCACCAATTACA

>D8PAK:00139:00320
GTGACGATTGTGCTCGACAATACA

>D8PAK:00139:00345
TTGTATTCCCGCATACATTACCGA

>D8PAK:00140:00317
AATCGGTTTGTGAGGCCGGACACA

>D8PAK:00140:00320
TTGTATTCTACGCCACACTTAACT

>D8PAK:00141:00305
CCTCGATCGTAGCCCAGGCTACAT

>D8PAK:00142:00311
TTGTATGCTATGCCACAATACTCT

>D8PAK:00142:00341
GTCAGGTTTGTATCCCCGCGTACA

>D8PAK:00142:00347
TTACAATTGTGTTTCAGCACACAC

>D8PAK:00143:00330
CATAATTCAGTAAGCTAGGTTACA

>D8PAK:00144:00312
GTTATGATTGTAACCGGTGCTACA

>D8PAK:00144:00315
TTTATATTTGTGGTGTAAGTCACA

>D8PAK:00144:00336
CACTTAACCGTATTCTAACATACA

>D8PAK:00145:00308
AGTGACTTTGTAGTCCGCAATCCA

>D8PAK:00146:00304
ATCTAAATTGTGCTTTGTGACACA

>D8PAK:00146:00322
TCGCAAATTGTGTCCTGCACTACA

>D8PAK:00147:00312
TTAAACTTTGTATCTTGTATTACT

>D8PAK:00147:00332
ATTATTATTGTATTCTAAGCTACA

>D8PAK:00147:00334
ATGTGGTCCCGCATCCAATTTCCG

>D8PAK:00148:00322
CTCTTCTAATCATCCTTTATGTAA

>D8PAK:00148:00338
TTCATCTTTGTGTGGCACGTTACA

>D8PAK:00148:00348
ACAGCTATTGTAAGCTCGATTACA

>D8PAK:00149:00319
GGAATTGTGACCCCGGTTACACTA

>D8PAK:00149:00326
TGGTCAGTTTGTGTGCCAACCCAC

>D8PAK:00149:00329
AATCAAATGGTGACCCAGATTACA

>D8PAK:00100:00351
AGTGATTGTATCCTACGGCACAAG

>D8PAK:00100:00353
CAGGACTGTGGCCTACACTACGTT

>D8PAK:00100:00355
TTCATACCACCATCCAGCTGCTAA

>D8PAK:00100:00362
TTGTGCTCCGGGACACACTCTCTG

>D8PAK:00100:00377
CCCATCTCTGTATTCCCGCTTACA

>D8PAK:00101:00359
ATACACTTTGTATTCTAGCTTACG

>D8PAK:00101:00376
TTGGATCTTGTGACATGGGATACA

>D8PAK:00101:00389
TAGCCAAACTGTATTGCCGGCTAC

>D8PAK:00101:00396
CTTCCAAAAGTATCCTACGTCACA

>D8PAK:00103:00356
CATTGTATTCCCCCTTACATGTTA

>D8PAK:00103:00377
TCGAAATCTGTATCACAGCCCACA

>D8PAK:00103:00383
GTAAAAATTGTATGCATCCACACA

>D8PAK:00103:00384
ATGTAAATTGTACTCTAGAGTACA

>D8PAK:00103:00397
GTTTCAATTGTATGCCTCGCCACA

>D8PAK:00104:00363
ACTCCGTTTGTATGTTAGCTTACA

>D8PAK:00104:00372
GTTTGTATTACAGGTCACACTTAT

>D8PAK:00104:00385
GAACGAATTGTATGCTGTAATACT

>D8PAK:00104:00387
ACCATAATTGTAGTCCATCCTACT

>D8PAK:00104:00396
AGAATGTATGCTGGCCTACAATTT

>D8PAK:00105:00395
CCAAACTACGCATCCGTCACGCTT

>D8PAK:00105:00396
GAATAGATTGTATGCGATAAGACA

>D8PAK:00106:00357
ACTTTGTTTGTGATCTGGCACACA

>D8PAK:00106:00370
TTTTATTTTGTAGCTTGCGATACT

>D8PAK:00106:00378
TCGCTATATGTAACCCAGATCACA

>D8PAK:00107:00385
AGATAATCCGTATCCTGGATCACA

>D8PAK:00107:00389
CTTCCTTTTGTATTGCGGCCTACA

>D8PAK:00108:00376
GACGCGTTTGTACGCCCGACTACA

>D8PAK:00108:00379
CTGTAGTTTGCGATACAATTCATC

>D8PAK:00108:00395
ACTGCGTTTGTGATTTACACCACT

>D8PAK:00108:00398
TCCCGGTATGTATGCTAAGATACA

>D8PAK:00109:00376
GGTTACATTGTAGCCGGGCCTACT

>D8PAK:00109:00394
TCTTAAATTGTATTATACATTACA

>D8PAK:00110:00362
TCTCCAATGGTATCCCACGTTACA

>D8PAK:00110:00389
TAATGGATTGTGACATAGAATACC

>D8PAK:00110:00395
CGTTAATTGTGTCCTATAATACAT

>D8PAK:00111:00360
CTCCTTCCCCCATCCATCCGGTCT

>D8PAK:00111:00366
ACCATCTTTGTATTCTAGGGCACT

>D8PAK:00112:00352
TCCTAGATTGTGACCTAGATCACA

>D8PAK:00112:00366
CTAATAGTGTAGCGTAGCATACAT

>D8PAK:00112:00371
TAATTTGTATTGTGGAGCACATTT

>D8PAK:00112:00372
AATGCTTTGTAATTCCGGCATACA

>D8PAK:00112:00382
GCGTATTTCTCATCCTTGATCCAT

>D8PAK:00113:00354
TAGGATTGTAATCGCTATTACATT

>D8PAK:00113:00370
AATTGAACTGTAGTGCAGATTACG

>D8PAK:00113:00387
ATGTATGCTAGACTACAGTATTCT

>D8PAK:00114:00352
ACCGAGATTGTCACCTGTCCTACA

>D8PAK:00114:00355
ATCGAGTCGGCATCCCACAGCTCT

>D8PAK:00114:00365
TTATTCATTGTGGCGCCAAATACA

>D8PAK:00114:00375
GTAGCAATTGTGGTGTAAGTTACA

>D8PAK:00114:00387
CTGTAGCCTGCGCTACCATTTCAC

>D8PAK:00114:00389
CAAAAGAAAGTGACACACGCTACA

>D8PAK:00115:00378
CCATTTTATGTATGCTGCATTACA

>D8PAK:00115:00397
TAGATTGTAGTCCAGCCTACACTA

>D8PAK:00116:00365
TTATAACCTGTAGCCTAGGATACC

>D8PAK:00116:00397
CAACACTCTGTACTCTAGACTACA

>D8PAK:00116:00398
TCAGTCTCTGTGACTTGCGACACA

>D8PAK:00117:00352
CACGGATAAACATCCAGGTTTTCA

>D8PAK:00117:00377
ATTTATATTGTAGTCCCTCATACA

>D8PAK:00117:00380
CTGGTTTTAGTAGTATGGGTTACA

>D8PAK:00117:00395
AATATAAATGTAGCGTGCACTACA

>D8PAK:00118:00364
CCCCTATTTGTATGCTAGGCTACA

>D8PAK:00119:00356
CGGAATTGTAAGCGAGCTTACAAC

>D8PAK:00119:00368
TGTACCTGTGTAGCCCAGACTACA

>D8PAK:00119:00397
GGTAGGTCTGTATGCTGGACCACA

>D8PAK:00120:00351
TTGTGTTGTAGAATACATGTTTGT

>D8PAK:00120:00352
ACCAATACCCCATCCTAATTCTAC

>D8PAK:00120:00361
TTTGAAATTGTATGCGACGATACG

>D8PAK:00120:00379
TACGTCATTGTAATGCGGACTACA

>D8PAK:00120:00392
AAACCTACTGTATCCTACGATACA

>D8PAK:00121:00351
CACGTAAATGTGCCCCTCATTACA

>D8PAK:00121:00395
GCGCTATATGTAATCCAGCCTACA

>D8PAK:00122:00372
CCTTCAATTGTATTTCCGGCTACT

>D8PAK:00124:00352
CTAAGTGTGCCCTGCCCCACAATC

>D8PAK:00124:00354
TTCAGCATTGTAACCTCGGCCACA

>D8PAK:00125:00354
GGGCGGTTTGTATCCTCCAATACA

>D8PAK:00125:00357
AACAGTTATGTATTCTAGGGCACA

>D8PAK:00125:00371
TTTGATTTGTATTCTAAACCACAA

>D8PAK:00125:00399
GACATAATTGTAATACAGAATACT

>D8PAK:00126:00378
ACTAGAATTGTAACAGGCACTACA

>D8PAK:00127:00381
TCTGACTTTGTGTCGTAGATTACA

>D8PAK:00127:00384
CTTTCGTTTGTGTGCTCCAATACA

>D8PAK:00127:00385
AACTCGAATGTATTAAGCGATACA

>D8PAK:00128:00377
AACTTTGTAGCCCAGAATACAATG

>D8PAK:00128:00399
TTGTGCCCCTGACTACAATCTTCT

>D8PAK:00129:00384
TTGCTTTTTGTATCCAACACTACA

>D8PAK:00130:00351
TTCTATACTTCATCCGTACGATGG

>D8PAK:00130:00362
ATGTGGCCTAGAATACATTTCGTC

>D8PAK:00130:00364
CTCTAAAATGTATGTTAGCCTACA

>D8PAK:00130:00365
CAGGCGACTGTTACCCAGCATACA

>D8PAK:00130:00374
TTGTGTTTTGCGCTACACTTCTTG

>D8PAK:00130:00386
ACCCTTAACTCATCCTCTATGACT

>D8PAK:00130:00392
GAGTAACCGTTGCCAACTAATACA

>D8PAK:00130:00398
CCTAGGAAAGTGATCTGGGCTACA

>D8PAK:00132:00370
AACAAAATGCATCCAGAAGTCACC

>D8PAK:00132:00380
CAAAATTTTGTATCTCGCCATACA

>D8PAK:00132:00394
TACTAATTGCATGCTACAATACAA

>D8PAK:00134:00365
CTGAACTGTATCGTACGCCACGAA

>D8PAK:00134:00374
TGCCCAACTGTAGTGCCCACTACA

>D8PAK:00135:00350
GTTACAACTGTATCCTGAACCACT

>D8PAK:00135:00367
TTGTGTTGTGGCCTACACTTTCCG

>D8PAK:00135:00374
ATCATGATTGTATCCCCGGACACT

>D8PAK:00135:00378
TTGTATTCCATATCACAGTCCTAT

>D8PAK:00135:00383
TTGTGTCGTATATTACATTTACGG

>D8PAK:00135:00391
AAAAAGAATGTAGCGTGTGCTACC

>D8PAK:00136:00351
AAAAAATACTGTATTCTGGTACAC

>D8PAK:00136:00375
TATCAAAAATGTATTCTGGGCCCC

>D8PAK:00136:00377
GTAAGAAATGTATTCCAAACTACA

>D8PAK:00136:00388
TATATGATTGTGTGCTGGCTTACA

>D8PAK:00136:00390
TAATCAATTGTACTCTGGCTCACT

>D8PAK:00136:00392
CCCGTCATTGTGACCTGCAATACG

>D8PAK:00136:00393
AACAAATTTGTATGCCGGCATACC

>D8PAK:00137:00355
AATAGAATTGTGACCCATAGTACA

>D8PAK:00137:00365
CAGAAGATAGTAATATATCATACA

>D8PAK:00137:00388
CTAAAATCGTATTCTGCCATACCA

>D8PAK:00138:00374
CTCTGTATTGTCATCTAGGCCACA

>D8PAK:00139:00368
TGGGTTCAAACATCCGCGGCACGC

>D8PAK:00139:00385
ATATAATATGTATTACCGGCTACA

>D8PAK:00140:00351
GCTCTGATTGTATCCAGCGATACT

>D8PAK:00140:00380
TCCGGTTTTGTACTCCAGCTCACA

>D8PAK:00140:00396
CTTTGCATTGTGGTCCAGAGTACG

>D8PAK:00141:00351
CTCGAGATTGTATGCCGATACACA

>D8PAK:00141:00390
CAGTTAATTGTAGTCCATATGTAT

>D8PAK:00142:00376
AATAATTTGTGTCCCCGACTACAC

>D8PAK:00142:00383
CTGTGTTGTGGCTTACAATCTTTA

>D8PAK:00142:00386
TTGTACGCTGGCACACATTTGTGC

>D8PAK:00143:00372
TTATCGATTGTATTCTAAGTCACA

>D8PAK:00143:00373
CTGGTAATTGTATTGTAAACTACT

>D8PAK:00143:00383
CCACTAATTGTAAGCGGTCATACA

>D8PAK:00144:00369
GTTAACACTGTATCCGTGAATACA

>D8PAK:00144:00378
GATCTCTTTGTAACCCAGATTACA

>D8PAK:00144:00394
ATTCCTTTCGTATTGCAGGCTACA

>D8PAK:00145:00360
GCCCTATTTGTAATACCGACCACA

>D8PAK:00145:00385
ACCAAATATGTGCTCTAAGTTACT

>D8PAK:00145:00387
GCTCGATTGTCGTTTGGAGTACAA

>D8PAK:00146:00360
GCCTCAATTGTGACCGTGCACACA

>D8PAK:00146:00366
CGTAAGTTTGTATCATAGAGTACT

>D8PAK:00146:00376
AAACGCGCCCATCCACCCAGCCAT

>D8PAK:00146:00386
ATTGATTTGTAACCTGGAACACAT

>D8PAK:00147:00351
CGTAAGTTTGTGATCCGTGCCACA

>D8PAK:00148:00362
AGTGGGTCTGTGTGCTGGATCACA

>D8PAK:00148:00369
CTAGAAAATGTATCACACGCTCCA

>D8PAK:00149:00376
CGCGAAATTGTAACCTGCAATACA

>D8PAK:00149:00387
CCAATAGTGTTCCCAAATACAATT

>D8PAK:00100:00415
AATCAGATCGTAACGTGGCTTACA

>D8PAK:00100:00431
CCGCCAAGTGTACTTTGCACTACA

>D8PAK:00101:00400
GTCTAAACTGTACGCACGGCTACA

>D8PAK:00101:00401
TATTCAACTGTACGACAGGATACA

>D8PAK:00101:00412
TCTCGGATAGTGTCTAGAGATACA

>D8PAK:00101:00425
GAAATTTATGTATTCCATAATACA

>D8PAK:00102:00444
ATCCCGAATTGTAACGCCCGTCAC

>D8PAK:00103:00406
CCATTTGTGACGCGGGATACAATT

>D8PAK:00103:00416
GTCGTACTTGTAAGCTGGAATACG

>D8PAK:00103:00419
CACAACTCTGTATTCTAGAGTACT

>D8PAK:00103:00425
GGTTTTTTTGTATGCCGTCGTACA

>D8PAK:00104:00408
TCTTACATTGTAAGTCAGCCTACA

>D8PAK:00104:00416
CTCGTAATGGTATTCCTGGATACA

>D8PAK:00104:00425
ATCTTGTTTGTCTTCCTGAATACA

>D8PAK:00105:00401
ATTAAAGTCCCATCCCTAGCTCTC

>D8PAK:00106:00410
TCGTCAATTGTAGTCTTGCACACA

>D8PAK:00109:00421
CTTCGGTTTGTATCCGGGTTCACA

>D8PAK:00109:00426
AGTTCAATTGTAATGCCGAATACT

>D8PAK:00109:00427
TAACGAAATGTGGCGTAGACTACT

>D8PAK:00109:00444
GAATTGTAAGCCAGCATACGGTTG

>D8PAK:00109:00447
CCCTGAAATGTGTCCCGGCATACA

>D8PAK:00110:00444
AAAGATTGTGTACCATGACACAGT

>D8PAK:00111:00446
AACGGACTGTATTATAGAGTACAT

>D8PAK:00112:00417
GACATCATTGTATTCTATACTACA

>D8PAK:00113:00412
CATAAAATCGTATCCTAGCCTACA

>D8PAK:00113:00431
CATAATTGTAACCCGAGACACGAA

>D8PAK:00113:00441
GGAACCATTGTAGGCTGGGACACA

>D8PAK:00113:00446
CATAAGATTGTATCACGGATTACA

>D8PAK:00114:00403
ATACCATATGTACGCTAGAGTACA

>D8PAK:00114:00444
TTGTAATCCAGGCCACAGTAAGGT

>D8PAK:00115:00435
ACCAGCTTTGTGTTCCCGGATACA

>D8PAK:00115:00437
TACTGAACAGTATCGCAGGACACA

>D8PAK:00116:00405
TAAAGATTGTATTTCGGCATACAG

>D8PAK:00116:00420
GTGTACATTGTGACTTGGAGTACG

>D8PAK:00118:00402
TGAGGTATTGTAGGGTGGGTTACA

>D8PAK:00118:00412
TTTGCGAATTGTATGCGCGATCAC

>D8PAK:00118:00414
ATCTGCATTGTAACGTATACTACA

>D8PAK:00118:00446
CTAAACACTGTACGCCATACCACA

>D8PAK:00119:00404
GATGACTTTGTGCCCCGAATTACA

>D8PAK:00119:00412
TTGTATTCCAATGCACTTTTCACC

>D8PAK:00119:00423
CACAAGTATGTATTGCTGGCTACA

>D8PAK:00120:00431
ATTGCAAAGGTATTACACAATACA

>D8PAK:00121:00401
GTTACGTTTGTATTTCAAAGCACA

>D8PAK:00121:00405
GCATAGATTGTATTCTGGACCCCC

>D8PAK:00121:00426
ATTGCCATTGTAGGCTAGCATACC

>D8PAK:00121:00442
TTGTAGTTTGCAGCACAGTTCGAG

>D8PAK:00122:00432
CGTATAACTGTATTCCGCGTCACA

>D8PAK:00122:00443
AATTAGAATGTGTCGGCGCCTACA

>D8PAK:00123:00431
TTGTAGCCCAGACTACTTTTCCTG

>D8PAK:00124:00407
TTGTGCTCCAAGTTACAATTTACT

>D8PAK:00124:00409
ATGTAGGCCAAAATACAATCCAGA

>D8PAK:00124:00422
CCCGGAAACGTATCCCATGACACA

>D8PAK:00124:00447
GCCCCAAAAGTAGTGCGGAATACA

>D8PAK:00126:00430
TTCCTATTGCATCCTGGGCTGGGT

>D8PAK:00126:00433
GACAGAATTGTAATCAGTCTTACA

>D8PAK:00127:00413
ATTGCGATTGTAGTATATGCTACT

>D8PAK:00127:00443
GAACAAATTGTATTTGAAGTCACA

>D8PAK:00128:00400
TTGTGGTCTGTCATACATTAGTTT

>D8PAK:00128:00419
AGTACAATTGTAGCCGGACGCACA

>D8PAK:00128:00422
CACTGTAAGCTAGAACACATTTCA

>D8PAK:00128:00437
AAAGACTTTGTAAGGCACGATACA

>D8PAK:00128:00439
TACTCAAACGTAGTTCAGGTTACA

>D8PAK:00128:00444
AGAAAATTTGTGCCTTGCACCACA

>D8PAK:00129:00405
TCTCCAATTGTGACTCTCATTACA

>D8PAK:00129:00423
TATGAATTAGTAATGCGGCATACA

>D8PAK:00129:00429
CGGGACTTGGCATCCTGCCATTAT

>D8PAK:00129:00430
GACATGATTGTCATCCAGACTACT

>D8PAK:00130:00408
GTGAGACTGTGCCGTGCGCTACAT

>D8PAK:00131:00416
CTTAACTACTCATCCCAGACCCTT

>D8PAK:00131:00441
AATGCAATTGTAACTGGCGCTACT

>D8PAK:00133:00440
TTGTATTTTGGGCCACTATTGTAC

>D8PAK:00134:00405
CCTAGAATTGTGACCTGACTTACA

>D8PAK:00134:00432
TAGCGGATTGTATCTTGTGACACG

>D8PAK:00134:00434
TTACCGTTTGTATCTACGCCTACA

>D8PAK:00135:00416
GATGCGATTGTAGTGCATCCCACA

>D8PAK:00135:00431
ATCTACTTTGTATCTCAGGCTACA

>D8PAK:00136:00408
GATCCAATTGTGAGCTGTACTACT

>D8PAK:00136:00416
TGATAGATTGTATCTCTCGACACA

>D8PAK:00136:00433
CTGTTGATTGTATTTCGAGTCACA

>D8PAK:00136:00437
TATTGATTTGTATCCGGGAGCACC

>D8PAK:00136:00438
TCTCACATTGTAATCTTCGCTACA

>D8PAK:00137:00436
TTTTCGAATGTGCACTAGAGTACT

>D8PAK:00138:00413
TTGGAGATTGTAGTCTGCACCCAC

>D8PAK:00140:00409
AAATCCATTGTAACGGAGGATACA

>D8PAK:00141:00405
GCCCGAAATGTGGTCCAGCCCACT

>D8PAK:00141:00414
GTTCTAATTGTATTACCGAACACT

>D8PAK:00141:00432
CCACGGATAGTAGCCAGGACTACA

>D8PAK:00142:00406
GACAATTGTACTACAGATCACAAA

>D8PAK:00142:00417
CGTCCAAATGTGGTCCATCATACA

>D8PAK:00143:00401
CGGACGTCTGTATCGCAGATTACA

>D8PAK:00143:00436
CTCGCTATTGTATGACTGAATACA

>D8PAK:00144:00409
ATTTTTGTGACCCGGGATACAGTA

>D8PAK:00144:00431
TTCAAAATTGTGTTGCTGGTTACA

>D8PAK:00144:00447
AAGTAATTTGTACCTTGTGCTACA

>D8PAK:00146:00431
CCCCAATTTGTATTCTAACACACA

>D8PAK:00146:00434
CCAGGGCTGCATCCTACCTGGAAG

>D8PAK:00147:00410
ACGTGTGTCCTAGCCTACAATTCG

>D8PAK:00147:00436
GGGCGGTTTGTATCCTCCAATACA

>D8PAK:00148:00404
TCCTTCAAATGTAATCTACATTAC

>D8PAK:00148:00408
ATTGTGACGTACGATACATAGTTT

>D8PAK:00148:00424
TTGTATTTTGGAACACAAAGTCTA

>D8PAK:00149:00449
ACCCATCTTACATCCGTCATTGGT

>D8PAK:00100:00487
AAAAGTGTGGCCTACTATACAGTT

>D8PAK:00100:00490
TACTTGTCTGTATTCTAGCTTACA

>D8PAK:00100:00492
ACACTCATTGTAAGCTATATTACA

>D8PAK:00101:00483
CCTTCAGCTGTATCCGGGCCTACA

>D8PAK:00102:00463
AACAATGTATCGCCGCCTACATTA

>D8PAK:00102:00477
AAGATTGAATTCCCGCATACAATT

>D8PAK:00102:00480
TCCGTCTTTGTACGCCTGATCACA

>D8PAK:00102:00486
CTTACCATTGTGGTCCAACCCACA

>D8PAK:00102:00491
TCTTAAAACGTAACCCTCAATACA

>D8PAK:00103:00460
ATTGATTTGTAACCTGGAACACAT

>D8PAK:00104:00483
CTAAAATCTGTACGCGGGATTACA

>D8PAK:00104:00495
CCCTAAATTGTATTCGGGATTACT

>D8PAK:00105:00450
ACAAAGATTGCAGGCCAGGTTACA

>D8PAK:00105:00454
TCAATAGTGACACAGGATACATTC

>D8PAK:00105:00458
AAGTATTCCAGATTACAAATTAGA

>D8PAK:00105:00463
TCTTAAATTGTGGTCAGAATTACA

>D8PAK:00105:00472
TTGTAATCTGCAACACAATCGTTA

>D8PAK:00105:00482
ACACAGATTGTAGCCTCCAATACT

>D8PAK:00105:00487
TCCCGCTTTGTGTCCTGGGCTACA

>D8PAK:00105:00494
GACTAGAACGTAAGCTATACTACA

>D8PAK:00106:00480
AACTACCTTGTATTCCTGCATACA

>D8PAK:00107:00457
CGCCCAGATTGTCATGCAGGCCAC

>D8PAK:00108:00459
GTCCCGTTTGTATTCTACGCTACG

>D8PAK:00108:00485
TTGTGGCCTAAGTCACAATTCGAA

>D8PAK:00108:00489
ACTTAGATTGTGTTCTGTATTACA

>D8PAK:00109:00469
TTGATATTTGTAGTCGGAAACACA

>D8PAK:00109:00472
ACCCACTTTCATCCTGCATTAGCG

>D8PAK:00110:00452
TTGTATTTTGGCACACAATGTACC

>D8PAK:00110:00455
TTGTGGTCTAGATTACAGTCTTCC

>D8PAK:00110:00476
GCGGAAACTGTGGCCCATGACACA

>D8PAK:00110:00477
ACTACCACTGTACGCTAAGATACA

>D8PAK:00110:00497
GCAATTGTGGTTCACGCTACAATT

>D8PAK:00111:00463
GCAATGATTGTAGTCCCCCCCACA

>D8PAK:00111:00467
AATGTAACTGTGGCCTGAGCCACA

>D8PAK:00111:00489
CATAACTTTGTGCCCCCCGTTACA

>D8PAK:00112:00463
TGTGGATTTGTATGCCCAAATACT

>D8PAK:00112:00469
ACTGTTATTGTATCCCCGCATACA

>D8PAK:00112:00474
AATAAGAATGTACTCCCGCATACT

>D8PAK:00112:00478
AATCAAAAAGTATCCCACGTCACT

>D8PAK:00112:00482
ACAGGAAATGTATTACCGCATACG

>D8PAK:00112:00484
AATTTAAATTGTATTACACATTAC

>D8PAK:00114:00450
TATCAACTGTAACCTGTCTTACAA

>D8PAK:00114:00484
TTGTAACCTAAGCCACAGGTTAAG

>D8PAK:00114:00487
TTTCGAATTGTATTCTAGGGCACA

>D8PAK:00115:00462
GAGCGAATTGTGCCCCATCATACC

>D8PAK:00116:00450
TTGTCAGATGTGATGTGTACGACT

>D8PAK:00116:00464
CGTGAAATAGTAGTAACGACTACA

>D8PAK:00116:00467
AACCAAAATGTATCCGTGCTCACA

>D8PAK:00116:00468
AATGATATGTATTCTGCCACTAAA

>D8PAK:00117:00484
CTAGGAATAGTATCCCAAATTACA

>D8PAK:00118:00493
TTGTATTCAGGAACACAATTTTCG

>D8PAK:00119:00460
TTCTTAATTGTAGCCTGAGACACT

>D8PAK:00120:00471
TGTGTGCATCCAATTCCCCATAGT

>D8PAK:00120:00493
GTCCGTATCGTATTACACAATACA

>D8PAK:00121:00455
TCGTATTCTAGGCCACAATCCTTT

>D8PAK:00121:00459
ATGTGTCCTGGATCACAAAGCGCG

>D8PAK:00121:00466
CTTCTAATTGTATACCACGTTACA

>D8PAK:00121:00472
AAATCCTTTGTAGTCCTGCATACA

>D8PAK:00121:00482
GGCGCTTATGTATGCCGGCATACA

>D8PAK:00121:00487
ATTTAAATGTGTCGTAGCCTACAT

>D8PAK:00121:00499
AGCCAAACTGTATTTCAGGCTACT

>D8PAK:00123:00477
TTGTGGCTTGGGGCACATTGTAAC

>D8PAK:00123:00492
CCCCACATTGTATCCTGTACTACT

>D8PAK:00123:00496
TGTAGTCTAGTATACTGAACGTAC

>D8PAK:00124:00471
CGCGCGTTTGTATGGCAGAGCACG

>D8PAK:00125:00484
TTGTATCTTGAATCACAATTCCTC

>D8PAK:00125:00487
CTTTCGACTGTAACCCGCATTACA

>D8PAK:00125:00490
CTTTACACTGTAATCTGGAACACA

>D8PAK:00126:00462
TTGCGAATTGTAAGGTATGATACT

>D8PAK:00126:00484
GTAAAAAGTGTATCTTAAACTACA

>D8PAK:00127:00481
TACAAATTTGTACTCTATCATACA

>D8PAK:00127:00484
GGCACCACTGTAGTCCACGATACA

>D8PAK:00128:00450
CTAACTATTGTAATCCAAAATACA

>D8PAK:00128:00472
ACGCAAATTGTGTCCTGAAACACG

>D8PAK:00128:00488
ACCGAGTTTGTGCCGCATATTACA

>D8PAK:00129:00473
ATAAGATTGTCTGCTGCGATACAA

>D8PAK:00130:00460
TTTTTCATTGTGGTCCAGCCTACA

>D8PAK:00130:00473
GCAGGTATTGTAGCCTAAGACACA

>D8PAK:00130:00475
CCCATAATTGTATTGCCCCATACA

>D8PAK:00130:00479
AAATTTGTACCATGGCATACAATA

>D8PAK:00130:00483
AACCGATAAGTGGTCTACGCTACA

>D8PAK:00131:00455
TTGCTAATTGTGCGCGAGGCTACA

>D8PAK:00131:00456
AAATAGATTGTGGCTCGGACTACA

>D8PAK:00131:00464
GAACAGAATGTATCGTGCGCTACG

>D8PAK:00132:00460
CATAAGATTGTATTCTATCATACG

>D8PAK:00133:00478
CGTTAAATAGTATTGTAAATCACA

>D8PAK:00133:00481
ATGTAACGTGCAATACATTTCTGT

>D8PAK:00134:00480
CTGATACCTGTATCCTGGGTTACT

>D8PAK:00134:00485
TCATGACTGTATTCTAGACTACAT

>D8PAK:00135:00467
CCAGATTGTGTTGCCGGTCACATT

>D8PAK:00135:00490
ACACAATTGTAGTTTCGGATACAA

>D8PAK:00136:00463
ATAGTCTCTCATCCGAAACCCACC

>D8PAK:00136:00467
AAAAGTGTGGCCTACTATACAGTT

>D8PAK:00137:00478
AAGACATTTGTGCTCAGCGATACA

>D8PAK:00138:00459
CCAATCTCTGTATTATGGCATACA

>D8PAK:00138:00480
AAATAGAACCGTAGCATAGAATAC

>D8PAK:00138:00485
TTGTAGTCCTCCTTACAGTTTCTT

>D8PAK:00138:00498
TGCCGATGCATCCGTTACCCATAC

>D8PAK:00139:00454
ATATTGACTGTATTACCGCATACA

>D8PAK:00139:00467
AAAACAAAAGTAGCCTGAATTACA

>D8PAK:00139:00486
TATGAGATTGTATCCACGACCACT

>D8PAK:00139:00493
AAAGGGATTGTACGCCCTAATACA

>D8PAK:00140:00462
CGATTGTAAGCCCTGATACAATCC

>D8PAK:00140:00478
TCGAATAGTAGCTTAAGATACATT

>D8PAK:00141:00459
ATCGACTTAGTAGTGTGCCTTACA

>D8PAK:00141:00476
CTCCGATTAGTAGCCAGGAATACA

>D8PAK:00141:00487
TAGCAGTCTGTATCATAGACTACA

>D8PAK:00142:00455
GTTTATTTAGTACGGTAGAACACA

>D8PAK:00142:00491
GGGCTAATTGTAGGCCATACTACC

>D8PAK:00142:00495
AATTGCCTTGTATCCTGTGCTACA

>D8PAK:00143:00465
CGACGTACTGTAACCTAGCCTACA

>D8PAK:00144:00471
ACCTGAACTGTGACTCACAGTACA

>D8PAK:00144:00476
GCCGAACTGTATGCTATCTTACAT

>D8PAK:00144:00489
AGTTAGATTGGATTACAGAATACA

>D8PAK:00144:00491
TACTCGATTGTGATTTAAGTTACA

>D8PAK:00145:00480
TTCTCCATTGTGACCTGAAACACA

>D8PAK:00146:00459
CTGCTAAACGTGGTATAGATACAA

>D8PAK:00147:00464
TCATAATAGTAGTCTGCGACACAT

>D8PAK:00148:00462
GCCTTAATTGTGATCTGGGATACT

>D8PAK:00149:00456
ACCCTAAATGTACCCTATAATACA

>D8PAK:00149:00477
TTGTAGCCCTGGCTACAGTTTTTT

>D8PAK:00149:00489
CACAACATTGTGTTGCGAGACACA

>D8PAK:00100:00500
TCGTAGATTGTATCGCAGAGTACA

>D8PAK:00100:00516
ATAACGATTGTAAGCCCTGCCACA

>D8PAK:00100:00537
CCCCAGATTGTGACCTGCATGACA

>D8PAK:00100:00547
TGAAAAAACGTGTTCCCGCATACA

>D8PAK:00101:00501
ATTTAGATTGTACGCCCGCCTACA

>D8PAK:00101:00521
AAATCTTCGCATCCGAGTGTCACC

>D8PAK:00102:00505
ACATAATTGTGCGCTAGATCACAT

>D8PAK:00103:00503
TCTATGTTTGTACGCCAAATTACA

>D8PAK:00103:00510
GCGCAGATTGTATCGCACGCCACA

>D8PAK:00103:00516
AAGCGAATTTGTATCCCACGTTAC

>D8PAK:00103:00538
TTGTAGTCTCCGGCACAATTTAAC

>D8PAK:00103:00539
ATAGCAATAGTGTTATGCAATACA

>D8PAK:00103:00544
CCTGAACTACCATCCATCTCATTC

>D8PAK:00104:00508
TACACGATTGTGTCAGTGGATACA

>D8PAK:00104:00536
CAAAATGTATGCTACCTCACAAAT

>D8PAK:00105:00506
GCTCTGAGTGTACGGTGGAATACA

>D8PAK:00105:00515
TTTTCCTTTGTATGCCATGATACA

>D8PAK:00105:00517
TGCCAGGGCTCATCCCCGCGTCAT

>D8PAK:00105:00532
ATATCGACTGTATGCCACGTTACA

>D8PAK:00106:00524
ATTTCAATCGTAGTCTAAAATACA

>D8PAK:00107:00511
TTGGGATTGTGCCACACGATACAA

>D8PAK:00107:00522
CCCGTAAATGTAACCTAGGTCACT

>D8PAK:00108:00505
GTGTGTCCTGGATCACAATTTTAA

>D8PAK:00108:00522
ACACGCTCCCATCCTATCTTCGCT

>D8PAK:00108:00526
ACAGTGTGACCTGGCATACAATTG

>D8PAK:00108:00531
GAGCCGATTGTATCTCCGACCACA

>D8PAK:00109:00529
GTCCATAACCCATCCTACCACAAA

>D8PAK:00109:00540
CTTGTTACTCCATCCGCTTTAGCA

>D8PAK:00110:00510
TCATCAACTGTACTCTGGGATACT

>D8PAK:00110:00516
ACGCAGACTGTATGCCCTGATACA

>D8PAK:00110:00540
CGTAACATTGTATCAGGGATTACA

>D8PAK:00111:00503
TAGTATTCTAGACTACAAAAAGCG

>D8PAK:00111:00506
TAGTGCTCCAGGATACAATCTACT

>D8PAK:00111:00517
GACCGGATTGTGGCCCAAGATAAC

>D8PAK:00111:00540
AAATTCTTTGTAGTCTACCATACT

>D8PAK:00111:00549
TTTAAATTGCATTGTGGCATACAA

>D8PAK:00112:00517
GATGTCTTTGTACTCTGGGTTACA

>D8PAK:00113:00520
TTTTGATTTGTATTATATATTACA

>D8PAK:00114:00534
TATTTCTTTGTATCGGGGGATACA

>D8PAK:00114:00549
TTCAAAATTGTGTTGCTGGTTACA

>D8PAK:00115:00502
GCATATTGTGGCCTGGAACACGTT

>D8PAK:00115:00505
AGACCTGCCATCCAGAGACTGTAA

>D8PAK:00116:00522
GTGTATTACCGCATACAATGTAGA

>D8PAK:00116:00545
ATGTAACCCAGGTCACAAAGCATT

>D8PAK:00117:00506
TAAACTTTGTGTTCTACACTACAT

>D8PAK:00117:00536
ATCAACTTTGTGATTTACCCTACA

>D8PAK:00118:00512
CTCATATTGTGGCCTAGAGCACAT

>D8PAK:00119:00512
CGCCAGAACGTAACCTGCACTACA

>D8PAK:00119:00534
CGAACAATTGTATGCTTTCGTACA

>D8PAK:00121:00522
CGCTAAAATGTAGCCCAGATTACA

>D8PAK:00121:00529
TTGTACTCTAGATTACAATTTAAT

>D8PAK:00121:00541
ATTCCGATTGTATCGTATGCCACG

>D8PAK:00122:00527
ACTCCGTTTGTATTCCACCTTACA

>D8PAK:00123:00506
ACTAAAACTGTGCTCGGTGATACA

>D8PAK:00123:00512
TTTTCGATTGTAAGCTCAATCACA

>D8PAK:00123:00541
TATAATTGTAGGCGAGGTTACTAT

>D8PAK:00123:00549
CGGACATTTGTAACTTAAGACACA

>D8PAK:00124:00504
GTGCCGATTGTATCCATAGTCACA

>D8PAK:00125:00529
CATTCATTCTGTATGCCAGGGCAC

>D8PAK:00125:00534
CTGTTATTTGTATTATGCACTACA

>D8PAK:00125:00538
AATTTAATTGTGTTACGTAATACT

>D8PAK:00125:00543
TATCTAATTGTACTCTGGGCTACA

>D8PAK:00126:00538
CATAATTGTATGCCAAGTGACATT

>D8PAK:00126:00541
GTCATAATAGTATCGTGAACTACA

>D8PAK:00126:00546
ACTGATTCTGTAGCCTAGACCACA

>D8PAK:00127:00522
ACGATTGTGATCTAGGCCACTTTT

>D8PAK:00127:00524
CATTGTGTCCTGTAATACCTTCTT

>D8PAK:00127:00525
ACCCTAAATGTAATTTGTAATACA

>D8PAK:00127:00532
TTCCCATTGTAACCACGGCTACAA

>D8PAK:00128:00514
ATCCCCATCCTGGAGCCTGCCAAC

>D8PAK:00128:00516
ACAATCGTGCTCTAGCATACAATC

>D8PAK:00128:00531
CTGTCTACTCATCCAGTCCTAGCC

>D8PAK:00128:00534
TTTCGAACTGTGTCAAGGGTTACA

>D8PAK:00128:00543
ATGTATGCTGCCATACATTCTAGC

>D8PAK:00129:00526
AGTGGACTTGTATGCCCAGTTACA

>D8PAK:00130:00513
ACTCCGATTGTAGCCAGGCATACA

>D8PAK:00130:00517
TTCTTGATTGTATTGTCGGACACA

>D8PAK:00130:00523
TTGTAATGTAGACCACATTTAATT

>D8PAK:00131:00507
ACGTCACTTGTAAGCTAAGATACA

>D8PAK:00131:00516
AACTACATTGTAGTCCAGTATACT

>D8PAK:00131:00527
TGTGAATCTGTATGCGCGGTCACA

>D8PAK:00131:00545
TGTACGTATGTATTCCAACATACA

>D8PAK:00133:00511
TTCAACGCACCATCCGGCTTTCTA

>D8PAK:00133:00516
GGAGGAATTGTAAGACGAATTACA

>D8PAK:00133:00517
GATTGCACTGTAGCCTGCAATACA

>D8PAK:00133:00519
TATTGAATTTGTATGCTCTGATAC

>D8PAK:00133:00542
TAGAATGTGATCTAGGCCACTATA

>D8PAK:00134:00511
TAGCCAATTGTAAGCAGCAACACA

>D8PAK:00134:00514
ATAGGGATTGTAACCGAACATACA

>D8PAK:00134:00524
GGTTTAATTGTAGTTTAGATCACA

>D8PAK:00134:00533
ATATTAATTGTAGTGGTAAATACA

>D8PAK:00134:00535
GTGTATGCTAGACTACAGATTCGA

>D8PAK:00134:00539
AACGCGATTGTGGTGCGGATTACA

>D8PAK:00135:00524
TTTAGTCTACCATCCACAGTATGT

>D8PAK:00136:00525
AACATGATTGTGTCGAGGCTTACA

>D8PAK:00137:00538
CACATATTTGTATTGCTACATACA

>D8PAK:00138:00505
CCTTGAATTGTATCCTAGTACCAA

>D8PAK:00138:00513
AAAAACACGGTATTCTAGCCTACA

>D8PAK:00138:00540
GGCTAGATTGTGGTGCAGGACACA

>D8PAK:00139:00523
CTCCTAACTGTAGTCTGCAACACA

>D8PAK:00139:00545
TACCCAATTGTGACCCCTAATACA

>D8PAK:00140:00547
TTGTCGATTGTGACGGAAACTACA

>D8PAK:00141:00524
AAAAGATTGTATTGAGGGTTACAT

>D8PAK:00141:00537
TCCTGAACTGTGCCCGGCAATACT

>D8PAK:00142:00538
TCCGGAAATGTACCCTGTACTACA

>D8PAK:00143:00519
AACAAACAAACATCCAGTAGAGGT

>D8PAK:00144:00529
ATTGACTTTGTGATACAGACTACA

>D8PAK:00145:00518
GACTAGAACGTGCTCTACAATACA

>D8PAK:00146:00511
ATTGACTATGTAACGCAGGTTACA

>D8PAK:00146:00518
TTTAGAAATGTAGGCTAGAATACA

>D8PAK:00146:00536
TCCCGATTTGTATCCCCTAATACA

>D8PAK:00147:00509
AATAACTTGTAGCCTGTACTACAC

>D8PAK:00147:00513
AGACCGATTGTACGCCAAGGTACA

>D8PAK:00147:00536
CTTTAATTGTATCCGGGAATACAT

>D8PAK:00148:00500
TAGTAGCCTCGCATACAATCACAT

>D8PAK:00148:00502
TAACTAAATGTAGTCTGGACTACT

>D8PAK:00148:00546
AAATTCGTCATCCTGTTACGTATA

>D8PAK:00148:00548
TTGTAGCCTAGATCACAATACTCG

>D8PAK:00149:00537
TCGCCAACCGTAGCCTGCGCTACA

>D8PAK:00149:00539
ATTTAAATTGTACCTTGGCTTACA

>D8PAK:00149:00543
TATCCTTTTGTAATACGTCATACA

>D8PAK:00149:00547
ACTTAGATTGTGCTCCGTATGACA

>D8PAK:00100:00551
ACAAAAACTGTATGCCAAAACACA

>D8PAK:00100:00577
CATCGAATCGTAGCTTGCGTCACA

>D8PAK:00101:00550
TTAATCATTGTGCCACAGAATACA

>D8PAK:00101:00554
TCCCAAAAAGTGGCTTGCGATACA

>D8PAK:00101:00562
GCAAATGTGTATCCTGAGCCACAC

>D8PAK:00101:00574
GTCGAGTTTGTATCTCCGAATACA

>D8PAK:00102:00573
AACTAGTTTGTGTCTAAGCTCACA

>D8PAK:00102:00575
TTACCCTTTGTAAGCTGCGTTACA

>D8PAK:00102:00576
GAAGAAATGTATCTTAGATTACAG

>D8PAK:00102:00581
ATCTCCTTTGTAAGCTGCCCTACA

>D8PAK:00102:00583
TCATAACTTGTAGCCACGGACACA

>D8PAK:00102:00585
GATAACATTGTACGCTGGCCCACT

>D8PAK:00102:00589
ATAAAGTGTATCCTACGTCACATA

>D8PAK:00103:00560
ATTAAAACTGTGTCCACGAATACG

>D8PAK:00103:00572
AATAATATTGTGATCTAGGCTACA

>D8PAK:00103:00575
AAAACCATTGTATGACAGGATACT

>D8PAK:00104:00552
GAAAAAGTTGTAATGTAGGGCACA

>D8PAK:00105:00564
GTCAAAACTGTAACCTGGGCCATT

>D8PAK:00105:00576
TTGTGCTCTTGGTCACAATTACGT

>D8PAK:00107:00559
GGAGCTACTGTAACCTACAATACA

>D8PAK:00107:00566
TGATTGTGATCCAACATACAATCA

>D8PAK:00107:00590
GACTTGTTTGTATCTTATATCACA

>D8PAK:00108:00553
TTGTAGGGTGAGCTACATTTCACT

>D8PAK:00108:00558
GCATCAATTGTAGGGTGTCATACA

>D8PAK:00108:00568
CGAACTGCAACATCCGTTTAAGCC

>D8PAK:00108:00589
AATTTAAACTGTGTCATAGCTCAC

>D8PAK:00109:00592
TTGCCATTGTGGGCTAGGATACAC

>D8PAK:00110:00560
TATCGATTGTATCCTACCATACTT

>D8PAK:00110:00587
TTTAATTTTGTGTCGTAGGATACT

>D8PAK:00111:00560
TATAAATTTGTATTATGAGATACA

>D8PAK:00111:00584
ATGTATCCTAGAATACACTTTAAA

>D8PAK:00111:00588
TTGTGGCTTGGGCTACTAAAAATA

>D8PAK:00111:00593
TTCCTAATTGTATCCCATGCTACA

>D8PAK:00112:00562
CGAATTGTAATGCAGAACACTATC

>D8PAK:00112:00586
TGCTCAAATGTATTCGTCACTACA

>D8PAK:00112:00597
GATCCAAATGTAGGATAAAATACA

>D8PAK:00113:00553
GGTCAAATAGTAACACAACATACA

>D8PAK:00113:00556
ATACCAATTGTGACGTCCACTACA

>D8PAK:00113:00560
GAAAATGTACTCTACACTACATAG

>D8PAK:00113:00583
GATGGAAACGTGAGCTATAATACA

>D8PAK:00114:00564
CTGTATGCTAGCATACCATCTGCT

>D8PAK:00115:00563
GACCGAACTGTATTGTGGGCTACC

>D8PAK:00115:00584
CACTCGATTGTAGTCCGGCATCCA

>D8PAK:00115:00597
CATGGGAATGTATTATGCGATACA

>D8PAK:00116:00562
TCTGAAATACCATCCGCCGGTGTA

>D8PAK:00116:00592
GTCTTGTTTGTGTCGCAAACCACA

>D8PAK:00117:00582
AACTTTATTGTAAGCCAGATTACA

>D8PAK:00118:00563
ATATTACATCCGCCACCTTTGTGG

>D8PAK:00118:00570
AAGTGAATTGTGATGCAGAATACG

>D8PAK:00118:00594
GCGCACACTGTGATCTATGTTACA

>D8PAK:00119:00594
TGCCTAATTGTGATTTACGCTACT

>D8PAK:00120:00552
GTGATCTTTGTACGCTAGTAACAC

>D8PAK:00120:00586
AAAGCTTTTGTATCCTAGGCTACC

>D8PAK:00121:00558
GTCAATCTTGTATGGCAGACTACA

>D8PAK:00121:00597
TCGCTGGGTGTAAGCTGCGCTACA

>D8PAK:00122:00576
ATTGGGAATGTATGCTGGACTACA

>D8PAK:00122:00597
AAAAAGATTGTACTACCCGATACA

>D8PAK:00123:00561
TGTTCATTTGTAACCCAGGTTACA

>D8PAK:00124:00559
GCCGGGAAAGTATGCTAGGATACT

>D8PAK:00124:00571
TTCAAAAGTGTATGCGGCAATACT

>D8PAK:00125:00568
ACTGTGATTGGAGTCTACGACACA

>D8PAK:00125:00599
ATCGAAAAGGTATGCCACGTCACA

>D8PAK:00126:00552
AACAAGATGGTATCCTGCGATACA

>D8PAK:00127:00553
GTTCACATTGTAGTTCTCAATACA

>D8PAK:00127:00582
TAATGATTTGTAGCTCACCATACA

>D8PAK:00127:00591
CTGAAATGTATTCTGGACTACTAG

>D8PAK:00128:00560
GCTGCGATTGTAACGCGCACTACA

>D8PAK:00128:00568
CTTCCGATTGTGACATACAATACT

>D8PAK:00128:00570
TTTCGGATTGTACGCTAGAGCCAA

>D8PAK:00128:00583
AACCAATAGTATCCCATAGTACAA

>D8PAK:00128:00599
ACCAGACATACATCCAATATCAAA

>D8PAK:00129:00575
GCGAACACTGTAATCCAGGATACT

>D8PAK:00129:00578
TTCAATACATCATCCACTGAGGCG

>D8PAK:00129:00580
TTCGATTGTAGCCCAGCCCACAGC

>D8PAK:00129:00581
TTGTACGCTGGGCTACATTTCTGG

>D8PAK:00129:00582
GCCTCGATTGTGATAGGCAATACA

>D8PAK:00129:00584
CTAAAGATTGTGTTCGGAATCACT

>D8PAK:00130:00585
CAAGTCCTTACATCCAAGTGCTCA

>D8PAK:00131:00554
GTGATCTTTGTAGCGCACACTACA

>D8PAK:00133:00564
TCAAATTTTGTATCCGGACTTACA

>D8PAK:00133:00568
AACACATTGTATCTTACACTACAA

>D8PAK:00133:00570
CTCTTAACTGTATCACATATCACA

>D8PAK:00133:00571
TCCTATATTGTATTGTGTGGCACA

>D8PAK:00133:00573
ATTGCCTTTGTATGCAGGCCCACT

>D8PAK:00133:00576
TTGGATAAAGTATCCCTGCATACA

>D8PAK:00134:00555
TGCCATTTTGTAACCCATACCACA

>D8PAK:00134:00557
TTATCAATTGTCACTTAGCATACA

>D8PAK:00134:00580
TTGTGTCCGGGCCTACAATTATTT

>D8PAK:00134:00592
CGAGACTTTGTGCCCTGGCCTACA

>D8PAK:00134:00595
GCGTCTAATGTGTCGCAGACTACA

>D8PAK:00135:00564
ATCAAAATGTGGCCTATACTACAC

>D8PAK:00135:00568
TTGTATGATGACATACAATTTTTA

>D8PAK:00135:00593
AAGTCAAATGTGTACTGGAATACA

>D8PAK:00136:00587
CAAAATTCGGTAACCTGTGATACA

>D8PAK:00136:00589
TCCCGAAAAGTAGTCACGAATACA

>D8PAK:00137:00558
TGTTGAATTGTAGTCCGAGACACT

>D8PAK:00137:00584
CGAGACACTGTAGTCCAGCGCACA

>D8PAK:00137:00585
TTTAAGAGTGTGTTGCACGCTACA

>D8PAK:00137:00596
CTGTACAGTGCATCCAAAGGGTCA

>D8PAK:00138:00552
AAGATTGTATGCTACGCTACTCAG

>D8PAK:00138:00557
TCCTTAATTGTAACGTGGACCACA

>D8PAK:00138:00561
GGTTAGATTGTATTCCAACGTACG

>D8PAK:00138:00581
CGAAGCAATGTGACCCGCAATACA

>D8PAK:00138:00597
TTTCCATCTGTATCCGGGAATACA

>D8PAK:00139:00568
TCGTATGTTGGGACACAATTCCTA

>D8PAK:00139:00575
CCGTGACATTGTGACTCAGGTCAC

>D8PAK:00139:00594
TATATCATTGTACCCTACGTCACA

>D8PAK:00140:00550
TTGTGATCTAACCTACAATTTGTA

>D8PAK:00140:00575
TGACAAATTGTGTCCTGGATCACT

>D8PAK:00141:00565
TTGTATGATGGCCTACAAGTTCCC

>D8PAK:00141:00595
TTGCGATCCACCATACAATCTTCG

>D8PAK:00143:00558
AACGTCATTGTATCACAGACTACA

>D8PAK:00143:00571
TTGTAGTTCAGCACACAGTCTACA

>D8PAK:00143:00599
ACCCACATTGTATCCTCCGACACA

>D8PAK:00144:00583
GTTAACTTCGTATTCCAACTTACA

>D8PAK:00144:00584
TCTGCAAATGTATGTACCGACACA

>D8PAK:00144:00589
GTATAACTGTAACCTGCACTACAC

>D8PAK:00144:00598
GTGTAACCTGAGTCACAATTGTCT

>D8PAK:00144:00599
GCATAGATAGTAGTCCAGAACACA

>D8PAK:00146:00559
AAATGAATCGTGTCCTAACCTACA

>D8PAK:00146:00564
CTCTGGTCTGTACCCTACGCTACA

>D8PAK:00146:00589
GCCCCGATTGTATGATAGCCTACA

>D8PAK:00147:00551
TTGTGTTCTAGAATACACTTGCGT

>D8PAK:00147:00590
ACATTAACTGTATGTTGCGATACA

>D8PAK:00149:00566
ATTATAATTGTGGTCTAGGCCACG

>D8PAK:00149:00570
AGTTTAATTGTAGTCTGGCTGACA

>D8PAK:00100:00603
TCCAAGATTGTAAGCTGTGTTACG

>D8PAK:00100:00615
ATATAGATTGTGAGCTTGCGTACA

>D8PAK:00100:00618
TAGCTTTTTGTAGCGCGGACCACA

>D8PAK:00101:00612
TTTAATTTTGTAACGTGAGCCACA

>D8PAK:00101:00613
GTACAGTTTGTGTTCTATCATACA

>D8PAK:00102:00600
AATGATTGTAATACTGATTACATA

>D8PAK:00102:00606
ATTTAAAAAGTAAGCCCGATCACA

>D8PAK:00102:00623
AGCGCCATTGTGTCGTGGAACACA

>D8PAK:00103:00607
TATCAAATAGTACTCTACAACACA

>D8PAK:00103:00619
GAGCAAATAGTGTCCCACGATACT

>D8PAK:00103:00631
AAATAAGTAGTATTCCACGCCACA

>D8PAK:00103:00640
CCCAAGATAGTGTCCTGTGTCACA

>D8PAK:00103:00647
GGTTCTATTGTATTCCCCACTACA

>D8PAK:00104:00600
TTTTTGTCTGTGTACTAGCTTACA

>D8PAK:00104:00644
TGTCAATTTGTATCTTAGACTCCA

>D8PAK:00104:00646
TATTTTTCTGTATGTTGCATCACA

>D8PAK:00104:00647
ATCGGCACTGTAATCCATACTACA

>D8PAK:00105:00611
GAAATTAATGTATTCCCGAACACA

>D8PAK:00105:00622
TTGTAGCGTGCCGCACAGTTGGCT

>D8PAK:00105:00637
AACAAAATTGTGACGCCGACTACT

>D8PAK:00105:00640
GCAAGATCTGTATGGCAGAATACA

>D8PAK:00106:00604
CTGTATTATGCACTACAATCTCGG

>D8PAK:00106:00610
GAGAAAACTGTGTTGTGTGCTACA

>D8PAK:00106:00626
AACTCGCATCCGAAGAGTCCGGTA

>D8PAK:00107:00614
ACGGAAATTGTAACATAATGCACT

>D8PAK:00107:00630
GACAGGATTGTACTCCGCATCACA

>D8PAK:00107:00644
GCACAAATTGTATTCCTACCCACT

>D8PAK:00108:00608
CAATTAATTGTATTAGACGTTACA

>D8PAK:00108:00616
CACCGGACTGTGTTACATGTCACA

>D8PAK:00108:00645
GTGTATGCCAGAGCACAATCACAG

>D8PAK:00109:00603
TAAATGTGACCCACAATACAAAAC

>D8PAK:00109:00633
TAAAACATTGTGGTCGAGGCCACG

>D8PAK:00109:00643
AAGTAATCTGTATGCTGGGATACC

>D8PAK:00110:00628
CCCATAAATGTGAGCTACGCCACA

>D8PAK:00110:00647
TTCAATTTTGTATTCCAGAGTACA

>D8PAK:00112:00617
TCATATGTATGCTAAGTTACAATT

>D8PAK:00113:00608
TACCGGATTGTATCCGAAACCACA

>D8PAK:00113:00612
TACCTGATTGTAACCCTGCATACT

>D8PAK:00114:00612
TTGTATTCTGCGCCACACTCTTCG

>D8PAK:00114:00623
AAGATACCTGTAGTCTGGGGCACA

>D8PAK:00114:00648
CTTCTTGCATCCTGCTTGTATAAA

>D8PAK:00115:00602
ATGTATGCGAGGTCACATATTTTG

>D8PAK:00115:00615
CTCAAATTGTGACCTAGGTCACAG

>D8PAK:00115:00621
GCTGAGTTTGTGACCTAAGTTACA

>D8PAK:00115:00622
CACACTTTGTATCCGAGGCCACAT

>D8PAK:00115:00639
TAAATTGTAAGATAGATCGATTCT

>D8PAK:00116:00601
CACGTAATTGTGTCCTTGCATACT

>D8PAK:00116:00616
ATGTGTCTTAGATTACAATTATCT

>D8PAK:00116:00637
AAACCGATTGTAAGGTAGAATACT

>D8PAK:00117:00622
TGTAACTTTGTAGCTTGGCTTACA

>D8PAK:00118:00614
AATTTCTTGTGTTCCCAGCTACAT

>D8PAK:00121:00619
TTATTGGTATCATCCAATGACTCG

>D8PAK:00121:00628
AGGAACAGTGTATTGCAAACCACA

>D8PAK:00122:00620
TTGTATGCCGTGATACTTTTTTTG

>D8PAK:00122:00640
CGGTGACCCGCATCCGTCACATGG

>D8PAK:00122:00645
TCGACAATTGTGCTCCACCATACT

>D8PAK:00123:00635
TCCTATATCGTATTCCACGCCACA

>D8PAK:00123:00644
GTGGAAGTCTCATCCTATCCCGCC

>D8PAK:00124:00622
CAAATTGTGTCTCACGTCACAATG

>D8PAK:00124:00629
ACGTCGTTCGTATGCCATAATACA

>D8PAK:00125:00601
AGAACTAATGTATCCGAGGATACA

>D8PAK:00125:00618
ACAATGTGACGTGCGCCACAGTTT

>D8PAK:00125:00619
ATTCAAGTTGTAGCTCCGAATACA

>D8PAK:00125:00623
AGATTTTTTGTGTGCTATCCTACA

>D8PAK:00125:00638
ATGTGACCGGGGTTACAATCGTTA

>D8PAK:00125:00640
CTCGTGATTGTACGCCTGCACACA

>D8PAK:00126:00629
TCAACTGTATCCGCGCATACAAAG

>D8PAK:00126:00631
GTCAACAATGTACGCCAGAACACG

>D8PAK:00127:00605
ATCTTGATTGTGTGACAGGTCACT

>D8PAK:00128:00649
ACGGACATTGTATCTTACGCTACT

>D8PAK:00129:00601
ACCTAGACGTACATCCTCGCTTCA

>D8PAK:00129:00607
ATGTGTCCGGGACTACAATATCTA

>D8PAK:00129:00613
CTTCAAATTGTATGCAGGACCACA

>D8PAK:00130:00638
TCTGCACCTGTATGCTGCCTTACA

>D8PAK:00131:00600
TACGACATTGTAGTCCAAGCTACA

>D8PAK:00131:00631
TTGTATCCTGGACTACAAATCCAG

>D8PAK:00131:00639
TCAGACTTTGTATTCCACCATACG

>D8PAK:00131:00646
CCAATTGTATCCCATATTGCACTT

>D8PAK:00131:00649
CAGAAAATAGTGTCTTGAGCCACA

>D8PAK:00133:00618
TCAACTATTGTAGCGTGACATACA

>D8PAK:00133:00628
TTGTGCCCTCGATCACAATTGGTA

>D8PAK:00134:00611
GACGCAATTGTATCGATGGCTACA

>D8PAK:00134:00617
ACAGGCATTGTACTCTGTGATACA

>D8PAK:00134:00642
TCTACGATTGTATCACATAACACT

>D8PAK:00135:00628
ATCAGAAGTGTGCGTTGGACTACA

>D8PAK:00136:00611
ACATGATTGTAGCACAGGCCACAT

>D8PAK:00136:00612
GCGCACACTGTGCCTTGGAACACA

>D8PAK:00136:00644
GATTCTATTGTAAGCCAGCTCACA

>D8PAK:00138:00609
ATTACGCAACATCCGCTTCATCTC

>D8PAK:00138:00628
TACAGAATTGTAAGGAGGGATACA

>D8PAK:00139:00630
TGGATAAATGTATTGCTGACTACA

>D8PAK:00139:00639
CCGAATGTACATCCGGCAGAACTC

>D8PAK:00139:00640
ATATAGATTGTAATACGCACTACA

>D8PAK:00140:00601
CTGCTGAGTGTGTCCCAGGTCACA

>D8PAK:00140:00605
ATGTATCCCCAGACACAATTGCTT

>D8PAK:00140:00610
GTAAAGATTGTAGCCTGGGCAAAG

>D8PAK:00140:00612
TTCCAGATTGTATTGCTACCTACA

>D8PAK:00141:00607
AACTCGTTTGTAACCCAAGTCACT

>D8PAK:00141:00615
CTTGGAAATTGTCATTCAAACCAC

>D8PAK:00141:00639
TAAAAGATTGTATGCCTTGTCACA

>D8PAK:00142:00603
CTGTATGCTGCATTACGTTTTTTA

>D8PAK:00142:00608
TACCCGATTGTAACCCATCCCACA

>D8PAK:00142:00649
TTGTGCCCTACGCTACTTATTAGA

>D8PAK:00143:00601
TATATTAGTGGTATCAGATTACAA

>D8PAK:00143:00629
GATCCGATTGTATCCTTGACCACA

>D8PAK:00144:00615
AAAAACATAGTAGTACTGAATACA

>D8PAK:00145:00609
ATGTAACCTGGACCACAATCATTT

>D8PAK:00145:00611
CTGTATTTCCGGTTACAATTAAGG

>D8PAK:00145:00616
TTCGACATTGTATCCTGTATTACT

>D8PAK:00145:00629
GGCTGAATCGTATTAGAGCCTACA

>D8PAK:00146:00616
ATGTGACGTAGCATACAATTGTAA

>D8PAK:00146:00618
TTGTAACCCAGGACACACTTATAA

>D8PAK:00146:00644
CCCTACTTGGTATGCCAGGCTACA

>D8PAK:00147:00627
CTCGGCTCTGTAGTACAGGATACA

>D8PAK:00148:00625
TCTAGTTTTGTGACCCTGAACACA

>D8PAK:00149:00601
GCTCAAATCGTAATCCGCACTACA

>D8PAK:00149:00620
GGGAAATTGTGCCGTATGTTACAC

>D8PAK:00149:00627
GCCAAATATGTAGCACGAAATACA

>D8PAK:00100:00664
GGTAAATTGTATGCTACATGACAT

>D8PAK:00100:00672
ATAGTAAATGTATTCCTGCTTACA

>D8PAK:00100:00673
TACGTGATTGTGACCTAGCTGACA

>D8PAK:00101:00692
ATGCACACTGTATCTTAGCCTACA

>D8PAK:00102:00650
CCACGAATTGTATTACGCCCCACA

>D8PAK:00102:00678
TCTGAATTCGTATGCCCGGTTATA

>D8PAK:00102:00692
AAAACTTTTGTATGCTGGAATACC

>D8PAK:00103:00655
TTCTCTTTTGTGTCCTACACCACA

>D8PAK:00103:00665
GGAAATGTAAGCCTTAATACACAT

>D8PAK:00103:00691
AATCAGTTTGTAACACATAACACC

>D8PAK:00104:00683
TTTATAACTGTACTCTGAGCTACA

>D8PAK:00105:00652
TTGTACTCCGGACTACACTTGCAG

>D8PAK:00105:00678
TGAAGTGTATCCCAGGATACTGTT

>D8PAK:00105:00684
TAGATTGTAATCTCGGTCACATTT

>D8PAK:00106:00655
TGTGCTTTTGTAATCCAGGCTATT

>D8PAK:00106:00656
TACATAACCCCATCCGGGCCAAGT

>D8PAK:00106:00671
GTTCGTATTGTGTTACGAGCCACA

>D8PAK:00106:00681
TAACGAATTGTATCCGGGGCTACC

>D8PAK:00107:00663
GCGCCATTTGTATCGCTGGACACA

>D8PAK:00107:00667
CTTCTGAGTGTAGTATGGAATACT

>D8PAK:00108:00654
TCTTCGATTGTAATTCCTGCTACA

>D8PAK:00108:00656
TTCTGAACTGTAAGACAGGCTACA

>D8PAK:00108:00659
AAAACGATTGTATGCTATCCTCCA

>D8PAK:00108:00679
CTCAAACTGTATGTCACGCTACAT

>D8PAK:00108:00682
ACGTTTGTGTTCTGCGATACAGTT

>D8PAK:00108:00698
TATTGAATTGTGTCCGTACTTACA

>D8PAK:00109:00654
TAACAATTGTAGCCTCGGATACAT

>D8PAK:00109:00667
AAGCGAACTGTAGTCCATAGCACA

>D8PAK:00109:00668
CCCCAATTGTGGCCTAGGCTTATA

>D8PAK:00110:00658
CGACAAAATGTGCTTAGGGATACT

>D8PAK:00111:00684
TTTTAGACTGTGACCACGAACACA

>D8PAK:00112:00671
TTAATTGTGTCCCTAACTACAATC

>D8PAK:00112:00680
GTATAAATGGTATCCCACGCCACA

>D8PAK:00113:00680
ATCACCAATGTGTCCCCGAATACA

>D8PAK:00113:00685
AAACCAAAAGTAGTCTACACCACA

>D8PAK:00113:00695
AAGGCAATTGTGAGCCCGGACACA

>D8PAK:00114:00665
TTGTAGCCCATGATACATTTCCGT

>D8PAK:00114:00686
AAGGCCTCTGTAGCCCATCTTACA

>D8PAK:00115:00653
CTTTAATTGTGTCGTGGAATACAC

>D8PAK:00116:00670
CTGGCGATTGTATGACAGGCTCCA

>D8PAK:00116:00679
CCGTTTGTATTCCACATCACATTT

>D8PAK:00116:00693
TTGTATTCTACGGCACAATTACAG

>D8PAK:00117:00653
TTGTAACCCACATCCAGCCTTGAG

>D8PAK:00117:00661
CACCCCTTTGTATTATAGACTACA

>D8PAK:00118:00673
TGCTTACTTGTATTATAGGATACA

>D8PAK:00118:00680
TACTAATTGTCATCCCAGTCACAA

>D8PAK:00118:00692
TTTGCAATTGTACGCCTGCTTACA

>D8PAK:00119:00666
CTTTTAAATTGTAGTCGTGCATAC

>D8PAK:00119:00670
CTGAAAACTGTAGTGCGCGTTACA

>D8PAK:00120:00678
AGGTAAAATGTGGGCGGCACTACA

>D8PAK:00120:00680
TTGCAGATTGTACTCCGCGACACA

>D8PAK:00120:00683
CTAGATTTGTGTGCTGTAATACAT

>D8PAK:00121:00654
CATCAGTTTGTATCGTAGACCACC

>D8PAK:00121:00659
TTGAACAATGTAACGCAGAACACA

>D8PAK:00121:00675
ATACAAGTGTATCCCGTAATACAC

>D8PAK:00122:00658
AAGATTGTAACATACAATACATTT

>D8PAK:00122:00677
TACCCGTTTGTATCATCGGTTACA

>D8PAK:00122:00693
ACGCGAAATGTATCCTCGGTTACA

>D8PAK:00123:00664
ACGATAAATGTATGATATCATACA

>D8PAK:00123:00665
CTGTGAATTGTAGGATGGGCTACT

>D8PAK:00123:00667
TATGATACTGTGGCGTACAATACA

>D8PAK:00123:00672
TCGCCCATTGTAACTGAGGGCACA

>D8PAK:00123:00691
ATGTAGTCCACTGCACAATTTTGA

>D8PAK:00123:00697
AGTCAATTTGTATCCCGGAGTACA

>D8PAK:00124:00653
CATACGTATTGTATCCCAATGACT

>D8PAK:00125:00650
CTTACCTTTGTATTCCCTGATACA

>D8PAK:00125:00654
TAGAACTGTATTCTACCTCACAGT

>D8PAK:00125:00674
AACGAACTTGTAGCCCGCGATACA

>D8PAK:00126:00664
AGTGAGATTGTGCCCCTGCATACA

>D8PAK:00126:00684
GGATTTTCTGTATTCCAGCCTACA

>D8PAK:00127:00668
CATAGAAATGTATCTCTGGATACA

>D8PAK:00128:00651
AGGGCCACTGTATTCCGGAATACA

>D8PAK:00128:00681
TTGTAATCCATGTTACAAAGGGTT

>D8PAK:00128:00690
GGCTTAATTGTATCGTGTGATACA

>D8PAK:00129:00678
TAGTGATTTGTAGCGTACCACACA

>D8PAK:00129:00680
AGCCGGGAGCATCCTGGGGCTATC

>D8PAK:00129:00681
ATCATTTTGTATCCTGGAATACAC

>D8PAK:00129:00683
TAGCTTAATTGTAATCTATGCTAC

>D8PAK:00129:00685
TTGTGACTTACGACACAATTAGCA

>D8PAK:00131:00660
AATACGACTGTATTACCTATTACA

>D8PAK:00132:00665
CTTTCAGATTGTAAGCCACCCTAC

>D8PAK:00132:00673
CCAAACATTGTGGCCCATATTACA

>D8PAK:00132:00675
ATTGTTATTGTATGCTGAGTTACA

>D8PAK:00133:00683
TTCCGAAATGTGAGGTGGAACACA

>D8PAK:00134:00655
CGTTTAATTGTGGTATAGCATACA

>D8PAK:00134:00659
CGAACTTTGTGGCCTGAACTACAT

>D8PAK:00134:00682
GATCGCATAGTAGCGCACGTTACA

>D8PAK:00134:00688
AAGTCCAATGTATGCTGGGCTACT

>D8PAK:00134:00690
GCCCGGATTGTAGTGTGTACTACG

>D8PAK:00135:00674
ATAAGATAGTGGCCTGTACTACAG

>D8PAK:00136:00684
TTGTATCCTTGACCACATTTCCCT

>D8PAK:00137:00675
TTATGGATTGTAATGGGGAGTACA

>D8PAK:00137:00679
TTGTGTCTTGGAACACAAACGTTG

>D8PAK:00137:00684
TTTTAGTTTGTAGTGTGTGACACT

>D8PAK:00138:00652
GGATGAATTGTAGTCCAGGATAAC

>D8PAK:00138:00653
GTCTGATTGTTCTCCATGCTACAA

>D8PAK:00138:00655
CTTATTTTGTATGCTGTAATACAC

>D8PAK:00138:00665
TTTATAATTGTAGCTGAAGTCACA

>D8PAK:00138:00669
CAGATCGTGGCGTAGCCTACAATC

>D8PAK:00139:00667
CCCCGAATTGTGATTAGGACTACT

>D8PAK:00139:00683
ACGAAATTAGTAGCCTGCCCTACA

>D8PAK:00139:00688
ATTGCTTCTGTATCCCAGCCCACG

>D8PAK:00140:00653
GTTGGATTGTGGGCGCCAATACAA

>D8PAK:00140:00663
GGTACGATTGTAACTCAAGCTACT

>D8PAK:00140:00681
ATCTAGATTGTATTCCCGAATACA

>D8PAK:00140:00688
ATGTAGTCCCACTCACAATTCATC

>D8PAK:00141:00663
GATTACAACGTATTCCAGTACACA

>D8PAK:00141:00694
GTCTCCATTGTATGCTGCATTACT

>D8PAK:00143:00650
GCGCAATTTGTAACTTGCACTACG

>D8PAK:00143:00688
ATGCAAATTGTAAGATAGGCCACT

>D8PAK:00144:00661
TGAATGTATCGTATCATACAATTA

>D8PAK:00144:00668
CGATCAATTGTAATCAGCGCTACA

>D8PAK:00146:00672
TTGTATTATGGATTACATTGCTAT

>D8PAK:00146:00689
CATGCAATTGTGGCTTGTGCTACA

>D8PAK:00147:00661
AAAATTGTGCCCCCGGACACAGTG

>D8PAK:00147:00698
TAATGTGTGATCTAGGCTACAAAC

>D8PAK:00149:00671
AGCAACTTTGTAGGCTGACACACA

>D8PAK:00149:00673
TGTGAGTTTGTATGCTTGGGTACA

>D8PAK:00149:00679
CTCTCGATTGTAATGTGAATCACA

>D8PAK:00149:00689
GGAAACTTTGTAATTCTTACTACA

>D8PAK:00149:00694
AACATCTTTGTACTCTGTAGTACA

>D8PAK:00149:00698
TTGTGTCCTGGGGTACAGTTTGAC

>D8PAK:00100:00705
TTGTGGCGTGCACTACTATTCGGT

>D8PAK:00100:00710
CTTTACCTTTCATCCAACCTAATA

>D8PAK:00100:00717
CTCCCAGCGCATCCCCATCGTTTG

>D8PAK:00100:00733
AAAAAGATTGTAGTCCCCACAACA

>D8PAK:00100:00744
GTGTAGCGTAGAATACATTTCGAT

>D8PAK:00100:00748
ATCGAATTTGTGTCTTATCGTACA

>D8PAK:00101:00739
GCTAAAATTGTGGTCTTGACTACA

>D8PAK:00101:00741
GCAGCAACGCATCCAGGGACAGAG

>D8PAK:00102:00726
TTGATGAGGCCATCCGTCGGAGCC

>D8PAK:00102:00741
TACAAGATTGTAATCCCCATTACT

>D8PAK:00102:00743
TTGTGATCCAGCATCCACTTGGTC

>D8PAK:00103:00735
CGAATTGTAGCTCGCGATACATTG

>D8PAK:00103:00743
GTTGATTGTGTCCCTGATTACAAT

>D8PAK:00104:00730
TTGTAAATCGTAGTCCACGTCACT

>D8PAK:00104:00736
AACTTGCTTTCATCCTTTTAGTAC

>D8PAK:00105:00714
ACCAAAATTGTCTGCTGCGCCACA

>D8PAK:00105:00734
TGGCTTTTTGTATCCCGTGCTACA

>D8PAK:00106:00735
GTTGAATTGTACTGTACGTCACAT

>D8PAK:00107:00727
TTGTGCCCTACGATACATTATAAC

>D8PAK:00108:00703
AGCATGTTTGTGGCCGCGGTTACA

>D8PAK:00108:00719
ACCCGACTGTGTCGTGGCTTACAT

>D8PAK:00108:00724
TATATTACTGTAGTATGGACTACA

>D8PAK:00108:00733
TTGTATTCTACGCCACACTTAACT

>D8PAK:00108:00749
AATCTAAATGTATCCCAGGTGACA

>D8PAK:00109:00718
GGTACGAATGTAATGTGGCCTACA

>D8PAK:00110:00701
CAATTCAGTGTGCCCTATGATACA

>D8PAK:00110:00722
ATGTAATTTGGCATACAATCGTGT

>D8PAK:00110:00729
AACTAGATTGTGATCTGAGATACG

>D8PAK:00111:00714
CTGTATCCCTGATTACAAACTAGA

>D8PAK:00111:00739
TAAAATTGTGGTCTGAGTCACGAG

>D8PAK:00111:00741
TAAATCATTGTAGCAGGGGATACA

>D8PAK:00112:00713
TTTCAACTGTATGCCAGCGTACAG

>D8PAK:00112:00716
CATTTAGCGCATCCGCACCCTATG

>D8PAK:00112:00721
AAGATTGTGAATTGGCATACAGTT

>D8PAK:00113:00703
CTCCGAATTGTAACTGGTAGTACA

>D8PAK:00113:00711
CTTCGATCTGTGACCTGTGATACA

>D8PAK:00113:00712
ACTCCGATTGTAGCCAGGCATACA

>D8PAK:00114:00720
AAAAGAATCGTGCTCCCAATTACA

>D8PAK:00114:00721
GGGCGAATTGTGGCCTGGACTTAT

>D8PAK:00115:00728
CTCTGTATCCACGGCTACATTACT

>D8PAK:00115:00729
TTTTCGAATGTACTCTGTACTACT

>D8PAK:00115:00737
GCATGAATTGTGACGTAAGGTACT

>D8PAK:00116:00703
GCGCCAATTGTATTCAGGATTACA

>D8PAK:00116:00735
TAGCAATTTGTACCTTAGGCCACA

>D8PAK:00117:00712
CAATAAATTGTAGCGCAAATCACA

>D8PAK:00117:00745
ACAATTGTACTCCAGCATACAGAG

>D8PAK:00118:00730
GTTCACAATGTATTACCGCCTACA

>D8PAK:00118:00738
GTTTTGATAGTATTGGGGGCTACA

>D8PAK:00119:00709
TTTCGGGATGTAGTCTGGAATACA

>D8PAK:00120:00704
AGATAATTTGTGTCCTAGGCCACA

>D8PAK:00120:00728
ATTTAAATTGTATGCCAGGTTATT

>D8PAK:00120:00731
CATTCTGTATCACAGAATACAATC

>D8PAK:00120:00736
CATTTAATAGTAGTCTGTAATACA

>D8PAK:00121:00710
AAGAATGTAAGGCATGATACATTT

>D8PAK:00121:00718
TTGTATGACAGCATACCGTTCGGT

>D8PAK:00121:00731
ACATAGATTGTGCGCTAAATTACA

>D8PAK:00121:00742
ATTACTAATGTACTTTGGGTCACA

>D8PAK:00122:00704
GGAATCAATGTAGTGTATACTACA

>D8PAK:00122:00706
TATAACACCGTACGCTGGCTTACA

>D8PAK:00122:00714
CCATAGATTGTGTCTTAGAACACA

>D8PAK:00122:00716
GATAGAATGTAGCTCTGCATACAA

>D8PAK:00122:00733
AAGATAACGTCATCCAGAGGGGAT

>D8PAK:00122:00741
CTTGAAATGTATGCTGCCCTACGA

>D8PAK:00123:00748
GCGGATTGTAGTCCGTGCCACACG

>D8PAK:00124:00738
TAATTCTCCCATCCAGGTTCCTCT

>D8PAK:00124:00747
TTGTTTGTACCTCAGCATACAATC

>D8PAK:00125:00719
TTCAAGATTGTAGTGCACCATACA

>D8PAK:00125:00738
GTGTGAACTGTGGGCCCCAACACA

>D8PAK:00125:00747
AATTATCATCCATCGTTTACCTGT

>D8PAK:00125:00748
TTCAACATTGTAACCTACAACACT

>D8PAK:00126:00701
AGTAAAATGTATCTTAGGCTACAA

>D8PAK:00126:00724
CCCACAATTGTGTGCTGCCTCACA

>D8PAK:00126:00727
TTGACCATTGTATGCCGTGATACT

>D8PAK:00126:00739
ATAGTCAGCCCATCCAGGTCTCAT

>D8PAK:00126:00744
ATCGAATTGTAGCCTCCGACACAG

>D8PAK:00127:00723
GTCCGAATTGTATGGAACACTACA

>D8PAK:00127:00748
TTGTAGCCCAGCATACCTTCGAAG

>D8PAK:00128:00718
ATCCCAATTGTGTGCGTAACTACA

>D8PAK:00128:00732
AACTTTAAATGTAGCACAGCCTAC

>D8PAK:00128:00733
TTGTATGATGACATACAATTTTTA

>D8PAK:00128:00743
GGTGGAAATGTAACATAGATCACA

>D8PAK:00129:00701
CTGTATGCTGGGTCACAATGCGCT

>D8PAK:00129:00731
TTGTATTCTATCGTACTATTTCAC

>D8PAK:00129:00749
ATCCGTATTGTATCTTACCCCACA

>D8PAK:00130:00727
CTGTATTGCAGGATACAATTCCGC

>D8PAK:00130:00746
GTTTAGAATGTGGCCCAGAATACC

>D8PAK:00131:00702
CGAATTGTAACCTGGACCACACTA

>D8PAK:00131:00704
TTGTAGCGCATCATACAGTTCTCA

>D8PAK:00132:00700
GTCTCAACTGTAACTTAGCATACA

>D8PAK:00132:00710
TTTCAGATTGTAGCTCTGAATACA

>D8PAK:00132:00733
AGATTGTGTCCTATGCTACTTTCC

>D8PAK:00133:00701
GTGCTAATCGTATGCCAGAATACA

>D8PAK:00133:00719
TTGTGGCCTGTAATACAATGGATA

>D8PAK:00133:00724
TTTTCAAACTGTAACTTAGCCCAC

>D8PAK:00133:00727
GCTATAATTGTATTGCCGCATACA

>D8PAK:00134:00709
TTCCGGAATGTGGCCTGGCCTACG

>D8PAK:00134:00726
TGAAAAAATGTACGCTCGGTTACA

>D8PAK:00134:00736
ACGAAATGTGTGTGCTGGCCCACA

>D8PAK:00134:00738
TCCTCGAATGTGACCTGACTTACA

>D8PAK:00134:00740
GGTTTAATTGTAGTTTAGATCACA

>D8PAK:00135:00723
TCTCGAATTGTAATCCTTGCTACA

>D8PAK:00135:00728
CACCCAATTGTATGTCAGCCCACA

>D8PAK:00135:00734
AATGGAATTGTACCCTGGAGTACT

>D8PAK:00136:00739
CAATCGATTGTAACTTAGATTACA

>D8PAK:00137:00716
GAAAACAATGTATCATGCCATACA

>D8PAK:00137:00729
TTGTATCCCATCATACAATCCTAT

>D8PAK:00137:00742
TCCTAATTTGTAGCGTATCATACA

>D8PAK:00137:00747
GTGCAGTTTGTGCGCTCGAATACA

>D8PAK:00138:00703
TTGTGCTTTGGGATACGTTTTCGG

>D8PAK:00138:00710
CATAGTGTGACCTGGATTACAGTT

>D8PAK:00138:00725
GTGCGAAATGTGATCCAGCCCACA

>D8PAK:00138:00726
TCTACCTATGTGTCTTGGCATACA

>D8PAK:00138:00736
ATTAATAGTGACATCCAAGACTAC

>D8PAK:00138:00745
TTCTGTATTGTAATGCAGCATACA

>D8PAK:00139:00710
CCTAACATTGTATTCCACATTACG

>D8PAK:00139:00733
AGGTCAACTGTAGTGACGGTTACA

>D8PAK:00140:00726
CTATAATCTGTAACCTAGGCCACA

>D8PAK:00141:00716
TGCGAAATTGTGTCCCTGCTTACA

>D8PAK:00141:00719
ACCTATCTGCATCCAGCGTGGAAA

>D8PAK:00141:00734
TGATCAATTGTAAGCTCGCATACA

>D8PAK:00142:00701
AATCGATTGTAGCGCAGCATGCAC

>D8PAK:00142:00716
TTGCTTATTGTAGCCCTCGTCACA

>D8PAK:00142:00718
AACACGAGTGTATGCTGCGTCACT

>D8PAK:00142:00748
ATTTGAAATGTGGCCCAGCGTACT

>D8PAK:00143:00709
GATGTCTTTGTATTGTATAATACT

>D8PAK:00143:00712
GGTCGATTTGTGGTCCCCACTACA

>D8PAK:00143:00716
GCGCGCTCGCCATCCAGACCCTTA

>D8PAK:00143:00723
GAAAATGTGACCGAGGCTACATTC

>D8PAK:00143:00727
GAATTATATGTACTTTGGCATACA

>D8PAK:00143:00729
TGTCAACTGTAGCACAGGTCACAT

>D8PAK:00143:00743
TACTTATGTGTAGCCCAAGACACA

>D8PAK:00144:00702
AAATAGTCTGTGCTCTAGAATACT

>D8PAK:00145:00724
AATTATTTGTAATATAGGATACAG

>D8PAK:00146:00702
CCCTACCCGCCATCCTATTAATTC

>D8PAK:00146:00716
CTTTGTGCCCTAGAGTACTATTTG

>D8PAK:00147:00728
AGTAGTTTGTATGCTGGAGTACAA

>D8PAK:00147:00733
CCAGACTTAGTAGTCTACAATACA

>D8PAK:00148:00700
CATGTAATTGTAATCTATCCTACA

>D8PAK:00148:00730
TAATACATTGTGGCACGGAATACT

>D8PAK:00148:00745
AAGAAGATTGTATCCTAGCACACT

>D8PAK:00149:00712
CACAAAAAACGTGTCCTGAGATAC

>D8PAK:00149:00726
TTCATTGTGCCATCCGCCGATTTT

>D8PAK:00149:00742
TTTTAGAATGTGGTGCCCGCCACA

>D8PAK:00149:00743
TAATTCTTTGTGCCCTGGCCCACT

>D8PAK:00100:00759
GCTTTAATTGTGTCCCTGCTGACA

>D8PAK:00100:00774
GTCCCATTTGTGACTCTGGTCACA

>D8PAK:00100:00779
ATCATCATTGTATTCTCGCCTACT

>D8PAK:00101:00768
TATGGAAATGTGCTCCCAAATACT

>D8PAK:00101:00779
TCGTCAATTGTAATCCACCGTACA

>D8PAK:00101:00794
ATGTCAACTGTATTTGGTGCTACA

>D8PAK:00102:00769
ATGTAACCTGCATTACATTCCAGT

>D8PAK:00102:00782
TTGTCGATCTGTATGCTGGAGCAC

>D8PAK:00102:00784
AAAAACTCTGTGTTCAGCGCTACA

>D8PAK:00103:00774
CCTATAATTGTAGGCGCGAATACA

>D8PAK:00103:00796
CCCACAATTGTAGCCTAGGCTAAC

>D8PAK:00104:00753
ATATTGTTTGTATTACAGAGTACA

>D8PAK:00104:00774
GCAAAGATTGTATGCTGATACACT

>D8PAK:00104:00778
ACAAAAATTGTATCGCTAATTACA

>D8PAK:00104:00781
ACCAAATTGTGCGATAGCGTACAG

>D8PAK:00104:00798
ATATTGATTGTAGTCTACTTCACA

>D8PAK:00105:00766
AAACGGAATGTGGCGTTGCTTACA

>D8PAK:00105:00769
CGGTTTGTATTCCACACTACAATC

>D8PAK:00105:00786
ACTTATATTGTATGTTCCGCTACA

>D8PAK:00106:00760
TACTCAATTGTGGCTCGTGACACA

>D8PAK:00106:00793
AATTCTGTATTCTGAGTTACAATG

>D8PAK:00108:00757
CATCAGATTGTAACCGGGCATTCA

>D8PAK:00108:00770
TTGTAACCTACAGCACAAACGTCG

>D8PAK:00108:00775
GACTTAATAGTGGCCCACGGCACA

>D8PAK:00108:00797
CCAGCAATTGTAGTTTGGCTTACT

>D8PAK:00109:00757
AAACCAAACGTGTTGTGGCCTACA

>D8PAK:00109:00784
TAAAACTTTGTATGCACCGACACT

>D8PAK:00111:00753
GTCTTTGTATGCCAGCATACAGAC

>D8PAK:00111:00797
ATGGCAATTGTGTTCTGGCACACT

>D8PAK:00112:00792
TCACTAAACGTAAGCTAGAATACA

>D8PAK:00113:00763
GCTCGATTTGTGGTGTGGGCCACA

>D8PAK:00113:00774
TCGTACATTGTAGGCTACGGCACA

>D8PAK:00113:00794
ACTTGGTCTGCACCCCAGAGATCC

>D8PAK:00114:00766
TTCATCATTGTATGCTGTGCTACT

>D8PAK:00114:00774
CCTTGATTGTGCTCTATCATACAC

>D8PAK:00114:00781
TAGTTCATTGTACTGCAAGTTACA

>D8PAK:00114:00783
TTCAACATAGTATTCGGGGACACA

>D8PAK:00115:00775
TTCGGGATTGTGCATTGTAATACA

>D8PAK:00117:00751
GTTTAACTGTATTCTAGCATACAA

>D8PAK:00117:00756
CTCTGGATTGTAATCTAAGCTACA

>D8PAK:00117:00760
TGTCCATTTGTATCATAGACTACA

>D8PAK:00117:00762
TTTACGATTGTGACGTGGAGTACT

>D8PAK:00118:00752
TTTACCTTTGTAACCTGGGCCACG

>D8PAK:00118:00777
TTTGACGTTGTAACATAGAATACA

>D8PAK:00119:00759
TGGTTAATTGTACTCTGTGCTACT

>D8PAK:00119:00772
TTCTCCATTGTATTGCAGACTACT

>D8PAK:00119:00788
ATCGCAAATGTAGTTCGCGCTACT

>D8PAK:00120:00773
ATACCAATTGTATTGCTCAACACA

>D8PAK:00121:00760
CCTGCGATTGTGCTCCCGGGTACA

>D8PAK:00124:00752
CTTTTAAATTGAGCGCAAGTCACA

>D8PAK:00124:00790
GAGAGATTGTACGTTAGACTACTA

>D8PAK:00124:00791
CACGCAATTGTAGTGTCTGTCACA

>D8PAK:00125:00781
TAGAAGATTGTATTCGCAGGCACA

>D8PAK:00126:00756
GCGCCGATTGTATGATACGTTACT

>D8PAK:00126:00773
CTTAAATATGTATGATGTGACACA

>D8PAK:00127:00756
TCCCAAACTGTAAGGTAGGATACG

>D8PAK:00127:00780
ATGGCAATTGTATCCTAACCTACT

>D8PAK:00127:00785
GACGGATTAGTAGTCCACGCTACA

>D8PAK:00127:00793
TAATAGTTTGCATGCTGGCGTACA

>D8PAK:00128:00753
CCTCAATTTGTATCCTAGACGACA

>D8PAK:00129:00754
CGTCTAATTGTGGTTTCGAATACA

>D8PAK:00129:00757
CCAGGAACACCATCCACCCAAACA

>D8PAK:00130:00757
GAACGGTTTGTGTGCCCCGCTACA

>D8PAK:00130:00791
CGCCTAATTGTATTCCCGCGTTAT

>D8PAK:00131:00755
GGATAAAATGTGGCTTGGGCTACG

>D8PAK:00131:00756
TCGGCAATTGTAACTCACGATACG

>D8PAK:00131:00757
GCCATTGTAAGCCAGACCACAAAG

>D8PAK:00131:00777
CTCCAACTTTGTATTCCACGTTAC

>D8PAK:00131:00786
CCCTATATTGTATTCCCCGTTACA

>D8PAK:00132:00782
ACTTATAATGTACTCCGGATTACA

>D8PAK:00133:00796
AACGTGACTGTGTGCCAGCCTACA

>D8PAK:00134:00790
TTATTTGTGTGGCAGAATACAATC

>D8PAK:00135:00766
TAACTTGTAGTGTAGCCCACTTTT

>D8PAK:00135:00777
CATTTGTTAGTATCCCCGGCTACA

>D8PAK:00137:00789
GATATAATTGTGCCCTAGAGTACA

>D8PAK:00137:00792
TCCCAAACTGTAAGGTAGGATACG

>D8PAK:00137:00798
CCGTAAATTGTATCCTAGAATGCA

>D8PAK:00138:00761
TTTCGCTCTGTGACCCCAGCTACA

>D8PAK:00139:00752
CACACGACTGTAACTGGGCACACA

>D8PAK:00139:00775
AAATAGTTGTAGTCTAGCACGACT

>D8PAK:00139:00778
AATGCAAAGGTATTCCAAAATACA

>D8PAK:00139:00795
CTTTGGGATCGTATTACAGGATAC

>D8PAK:00140:00769
CTGTAACCGGCGTTACAATCCTTT

>D8PAK:00140:00783
TGTGAGAATGTAAGGTCCGATACA

>D8PAK:00141:00771
TTGTTTTCTGTAACCTGGAACACA

>D8PAK:00141:00784
TCATACTTTGTGTTTCAGCCTACA

>D8PAK:00142:00771
ATATGAATCGTATCCTAGCCCACT

>D8PAK:00143:00767
ACTGCACTTCCATCCTAATGGTAC

>D8PAK:00143:00791
ACTCCATATGTATTCCGGGACACA

>D8PAK:00143:00797
ACAGCAATTGTAGCGTACGACACT

>D8PAK:00143:00799
AGAAACACTGTATCCGAGCGTACA

>D8PAK:00144:00768
TCCCCGACTGTATTCCAGAGTACA

>D8PAK:00144:00782
TGCCGATTGTCATCCGGAATACAG

>D8PAK:00145:00759
ATGAAGTTTGTATTCAGCGTTACA

>D8PAK:00145:00777
TAACCGTATTCATCCAGTTACTTA

>D8PAK:00145:00787
CTTCCGATTGTAGCAAGAGTCACA

>D8PAK:00146:00759
AATGTAATTGTAGCGTGCACTACT

>D8PAK:00146:00762
CCCTGAATTGTATTGTGCCGTACA

>D8PAK:00146:00780
GTAAATTGTATCTTAACATACTGT

>D8PAK:00147:00754
TCTTAAAACGTAACCCTCAATACA

>D8PAK:00147:00792
TTCGTAAAAGTATTATGGACTACC

>D8PAK:00148:00769
ATCGCCTTTGTGGTCCTGGCTACA

>D8PAK:00148:00796
TTTCAATTTGTAGCCCCCACTACC

>D8PAK:00149:00752
GAATTGTGCCCTGTATCACAATTG

>D8PAK:00149:00786
GCGGAATTGTAGCGTCAAATACAC

>D8PAK:00149:00795
AGATACTTTGTATTCGGCGTCACT

>D8PAK:00100:00830
ATATACCTTACATCCTGCTGACTA

>D8PAK:00100:00832
AACGCAATTGTATGCTGCACTCAA

>D8PAK:00100:00839
CTAGTAATGTATGCTGCGCTACAC

>D8PAK:00100:00847
TCAGGCAGTGTGGCCCACACTACA

>D8PAK:00101:00800
GAGTTAATTGTAACGTGCGTCACA

>D8PAK:00101:00811
TATCCATATGTATCACGGGCCACA

>D8PAK:00101:00817
AAACCAATTGTACGTTATGTTACA

>D8PAK:00101:00823
GACTTCATTGTAAGCTATGCTACA

>D8PAK:00101:00827
TATGAAACTGTATGCTAATGTACA

>D8PAK:00101:00845
CGTTTGTATGCACGGATACAATTT

>D8PAK:00102:00824
AATGACACTGTGGCGTGGCCTACA

>D8PAK:00102:00842
AATGCAATTGTATTCTGAAATACA

>D8PAK:00104:00801
TATTAGAATGTAACACACAATACA

>D8PAK:00104:00819
CTAAACTTTGTCTTCTAGCACACA

>D8PAK:00104:00834
TTTTCCATTGTAGTCCGCATTACA

>D8PAK:00105:00830
AGTTACATTGTGTTACATCATACA

>D8PAK:00105:00835
ATCGCTTTTGTAGTGCCGGTTACA

>D8PAK:00105:00838
TTTTGAAATGTATCCGTCGTTACA

>D8PAK:00105:00841
TGTGTGATTGTAATCCGTAACACA

>D8PAK:00106:00809
ATTAATTGTAGTCGGAAGTACATA

>D8PAK:00106:00835
TAATAAATTGTACCTTGCGCTACA

>D8PAK:00106:00843
ATCTAGATTGTATTCTGTGCTACC

>D8PAK:00107:00834
TTGTATCCTGGGCTACTTTTATTG

>D8PAK:00108:00806
CTCCAAATTGTATTACAGGAGACA

>D8PAK:00108:00840
ATCTAGTTAGTATGATGCGCTACA

>D8PAK:00109:00801
TGACTCTTCGTATGCTAGGGTACA

>D8PAK:00109:00821
CCTAAGATTGTAGCTGCCATTACA

>D8PAK:00110:00820
AACTGGATCGTATTATAAACTACA

>D8PAK:00110:00828
CGGTAAATTGTGTCCCTGCCTACT

>D8PAK:00110:00833
TAGCAATTTGTATGCTTGCATACA

>D8PAK:00110:00837
TGACGTTATGTGCTTCATGCTACA

>D8PAK:00110:00846
TGTAGCCCAGGTCACATTTCTGTC

>D8PAK:00111:00818
ACTAAAAATGTATCCTCCGTCACT

>D8PAK:00111:00847
TCGTGATTGTATTGGGTGATACAA

>D8PAK:00112:00806
TTGTAGCCTACCATACATTCGGTC

>D8PAK:00112:00814
TAATAAATTGTATGCCAGCCCGCA

>D8PAK:00112:00821
AACTGGATCTGTGACCTGGGCCAC

>D8PAK:00112:00830
CATTAATATGTAACGTAGACCACA

>D8PAK:00112:00834
CCACAATTTGTACTCTACGCTACA

>D8PAK:00114:00808
GGCCGAGCCCCATCCATTCTCTAT

>D8PAK:00114:00826
AGCCATGTTGTCGATCCGATTACA

>D8PAK:00114:00832
TTATACTTTGTATTCTAGGCTGCA

>D8PAK:00116:00813
CCAAAATTTGTAGCGTGCATCACA

>D8PAK:00116:00819
AATTAACTGTATCGTGGGTCACAA

>D8PAK:00116:00824
TATTGATTAGTAACATACAATACA

>D8PAK:00117:00801
GAGGCGCTATCATCCTCGATCCCC

>D8PAK:00117:00804
ATCCTAATTGTATTCCTGAATACC

>D8PAK:00117:00832
GTGCTATTTGTATTCTGCATTACA

>D8PAK:00119:00822
ATCATGATTGTGTGGTGGGACACA

>D8PAK:00121:00810
GAGAAGACTGTGTTACCGGATACG

>D8PAK:00121:00833
ACTTTTTTTGTAATCTTCGTCACA

>D8PAK:00121:00839
GTCTAAACCGTATTGTGGGCCACA

>D8PAK:00122:00847
GTGTATTCCAGGCTACACTTCGGG

>D8PAK:00123:00803
GCAAAAAACGTAACCTCGGCTACA

>D8PAK:00123:00838
TCCATGATTGTGCCTTATACTACA

>D8PAK:00123:00839
GTCGAAATTGTAGCCTATGTTATT

>D8PAK:00123:00847
TATCTCATTGTGTTCTGCCCCACA

>D8PAK:00124:00812
AAACCAAAAGTAGTCTACACCACA

>D8PAK:00124:00813
AGGCGGAAAGTAGCCCATGGTACA

>D8PAK:00124:00833
CTGTAGCCCAGAACACAATAGCCC

>D8PAK:00124:00843
AAATGGATCGTAGCCGGCGATACA

>D8PAK:00125:00800
CACGCATTTGTAGCACAGCATACG

>D8PAK:00125:00801
TTGTAATGTGCGTCACACTTGCGC

>D8PAK:00125:00805
TTTTAGAATGTATCCTAACCTACA

>D8PAK:00126:00814
TCTGCTTTGTAGCTTGCACTACAT

>D8PAK:00127:00807
CTGCTAATTGTGTCCTGGGCTACC

>D8PAK:00127:00835
GCCCAGACAGTGTGCAGGCATAGA

>D8PAK:00127:00842
CACGCCATTGTGTCGTAAGCCACA

>D8PAK:00128:00801
TTGTTAAATGTGAGCTGGAATACA

>D8PAK:00128:00809
ATAGACTGTGACCTGACATACATT

>D8PAK:00128:00811
TAAATTGTAGCATGTACCACAAAG

>D8PAK:00128:00816
CCCTTACTTTCATCCCCCCTTCCT

>D8PAK:00128:00827
TGTCAGAAAGTATTCCTAGTCACA

>D8PAK:00129:00840
CATAGATTGTATCCCACCTCACAT

>D8PAK:00130:00822
TTGTGACGTGGAACACAATTTCTT

>D8PAK:00130:00833
CTTCAACATGTGGTCCAAGTCACA

>D8PAK:00130:00841
AATCGAATAGTGCCCGGGGCTACA

>D8PAK:00130:00842
ATGATAAATGTGTTCTGCGCCACA

>D8PAK:00130:00845
ACATGGACTGTAGTTTAGCATACA

>D8PAK:00131:00803
TTGCGGAATGTAAGGTAACCTACA

>D8PAK:00132:00803
TTGTAATCTGACATACAATCCCTG

>D8PAK:00132:00829
GCTCAGACTGTGAGCAGCGTTACA

>D8PAK:00132:00846
AGTTAATTGTGGTCTGCCATACAA

>D8PAK:00132:00848
CCTACAATTGTCACCGCGAATACA

>D8PAK:00133:00800
CACAAGACCGTAACCTAGGTCACA

>D8PAK:00133:00804
CTTCTTTTGTGCCCCAGACTACAC

>D8PAK:00133:00817
AATAAATTGTGAGATGGGCCACAT

>D8PAK:00133:00824
CAAATTGTAACATAGGACACTATT

>D8PAK:00133:00834
TTTTCAACTGTATGCTAGGCTACG

>D8PAK:00133:00838
TTCGAGTTTGTATTGTGCATCACT

>D8PAK:00134:00805
TTCAAATTGTATGATCAATTACAA

>D8PAK:00134:00833
CATAGGTTTGTATGCCACCTGACA

>D8PAK:00134:00841
TCCAACTTTGTAATGTAAACTACA

>D8PAK:00134:00846
TACTAAATTGTGCGTCGCAATACA

>D8PAK:00135:00800
TCGTATGCTGTACCACATTGTGGC

>D8PAK:00135:00846
GCGTAATTGTGCATCCCGCTACAT

>D8PAK:00136:00815
GTGGCTTTTGTAGTCCTTGCTACA

>D8PAK:00136:00829
GGTGACACTGTGGTGTAGCCCACA

>D8PAK:00137:00840
TTAAAGTGTAGCCTTGATCACATA

>D8PAK:00138:00803
AGTCTGAAAGTGTTCTAACCCACA

>D8PAK:00138:00818
TGAAATGTGCTCTAGCCTACATTT

>D8PAK:00139:00809
GACCCGACTGTAATCCGCGTCACT

>D8PAK:00139:00822
TTGTAGCTCGGAATACGTTTTGTG

>D8PAK:00139:00833
ACTAAAATTGTAATGTGTAATACA

>D8PAK:00139:00835
TTGGAATTGTAACCTACGCCACAG

>D8PAK:00140:00840
GTTGAAATTGTGGTTCACGTTACT

>D8PAK:00140:00845
CTTGCGATTGTAGCCAGGGACTCA

>D8PAK:00140:00846
AAAACTGTAGCCCGTACCACAATA

>D8PAK:00141:00810
TTTTACGCTAGAACACAGTATCAC

>D8PAK:00142:00814
AATCGGAATGTAATGCGGAATACT

>D8PAK:00143:00808
ACCCTGCTTGTATTCTACGATACA

>D8PAK:00143:00816
TTGGTATTTGTAGCCTGTATTACA

>D8PAK:00144:00835
TTGTCGATTGTGCCCTGGCGTACT

>D8PAK:00144:00837
CCTTTGTTTGTAAGCGGCGCCACA

>D8PAK:00145:00822
CCGTAGATTGTAGCCGAGCCCACT

>D8PAK:00146:00804
TTGTAGACTGTGACCTACGACACC

>D8PAK:00146:00807
AAGGGAATTGTAACGTGGACTACT

>D8PAK:00146:00823
AATTCTTATGTATTCCAACTCACA

>D8PAK:00147:00802
GCATAAAACGTATTACGAAATACA

>D8PAK:00147:00805
TGACTCACCCCATCCTTCAACCTA

>D8PAK:00147:00825
TCTCCAATTGTACTACAGACTACT

>D8PAK:00147:00831
AAAACTGTGGTCTACAATACAATC

>D8PAK:00148:00823
TTAAATTAATCATCCTCACTGACT

>D8PAK:00100:00866
GTACGAAATGTGACCCAGATTACA

>D8PAK:00100:00868
ATCAAAAATGTGACGTACGTCACA

>D8PAK:00100:00894
TTGTATTACAGAATACTAACAGCT

>D8PAK:00101:00856
TAGTAGCCTAGGCTACAATGTAGA

>D8PAK:00101:00872
TTGTATCTCGGATTACAAATCGCG

>D8PAK:00101:00876
TAATCGATTGTATCCACCATCACA

>D8PAK:00101:00877
AAACACTCTCATCCTTCTCATATG

>D8PAK:00102:00867
CTATATTGTGCTCCACAATACAAT

>D8PAK:00103:00853
CCCACATTTGTGATTTAGCATACA

>D8PAK:00105:00878
CAGCCCTGTGTGCCCCAGGATACA

>D8PAK:00105:00881
CTGTAGCCTAGGCTACGTTTATTA

>D8PAK:00106:00851
GATGAACTTGTGTCCCACACTACT

>D8PAK:00106:00859
TTCGGTCCGCGTCATCCTGTACCG

>D8PAK:00106:00866
TTGTGTCCCAGCGTACATTTGGAT

>D8PAK:00106:00882
ACATACGTTCATCCGAAGTCCCCA

>D8PAK:00107:00898
CTTTAAAGTGTGGCCTATCATTCA

>D8PAK:00108:00868
TTCTTGTTGGCATCCGGCGTCCAC

>D8PAK:00108:00885
CTTCATCTTGTAGCGTGGACTACT

>D8PAK:00108:00895
TTTCTGTTAGTGCCTTGGCATACA

>D8PAK:00108:00899
TTATTAATTGTGAGCTGAGTCACA

>D8PAK:00109:00859
GCTGTGTTTGTGTCGTAAGCTACA

>D8PAK:00109:00878
GGGCAAATTGTGACCCAAGCCACT

>D8PAK:00110:00876
TGAAAAAATGTACGCTCGGTTACA

>D8PAK:00110:00878
ATAGAATCCGCATCCTGACTTATA

>D8PAK:00110:00881
GACGTGTTTGTGTCCCCTATTACA

>D8PAK:00110:00882
AAATTTGTGGCCTAAACCACATTA

>D8PAK:00111:00867
GCTCGATTTGTGGTGTAGGCCACA

>D8PAK:00111:00870
GACTCAATTGTGCCCGTAGATACA

>D8PAK:00112:00852
CCGAAATTGTGTTGTGGACTACAC

>D8PAK:00112:00857
ATAATAATTGTAGCGCGTCGTACA

>D8PAK:00112:00865
ATACCGATTGTGGTACTGAATACA

>D8PAK:00112:00871
AAAACAGTAGCCGAGCATACACTT

>D8PAK:00112:00880
TACTAAAATGTATCCGGCAATACT

>D8PAK:00113:00859
CGCGAAAGTGTATTTTCCAGTACA

>D8PAK:00113:00872
CTTTTCACTGTAATACAAGTTACA

>D8PAK:00113:00891
TAACAGATTGTACCCTGGACTACT

>D8PAK:00113:00896
TTGTGCTCTGCACCACATTTCTAC

>D8PAK:00114:00864
TATGAGACTGTGACCCTGAATACA

>D8PAK:00114:00870
TTGTGATCCGGCATACACTCCTAT

>D8PAK:00115:00864
CAGTTAATTGTATGCCAACTCACT

>D8PAK:00115:00870
GATACAAATGTATCGCAAAATACA

>D8PAK:00116:00878
ATTAGAATAGTATGCTAGAACACT

>D8PAK:00116:00884
TTGTGGCTCGGCATACAGATCGTT

>D8PAK:00117:00866
CTTGCGAATTGTAGGCTCTATTAC

>D8PAK:00118:00878
AGCAAAATTGTACGACGGAGCACA

>D8PAK:00118:00886
AATGCCTTCTCATCCCGCACCTTC

>D8PAK:00119:00854
TTGTGACTTGGGCTACACTTGCCG

>D8PAK:00121:00859
GCCAAAAATGTAACTCGAACTACA

>D8PAK:00121:00874
TTGTGACCTCGGACACATTCCAGG

>D8PAK:00121:00877
TTTTTTTCAGTATTCTGGGTGACA

>D8PAK:00122:00889
AAAACGATTGTAATCCAAAATACA

>D8PAK:00122:00894
TACCCCTTTGTGTCCCAACATACA

>D8PAK:00122:00897
CCCGGAATTGTGACGTGGCGTACG

>D8PAK:00123:00864
AGGAACTCTGTACGCCAGATCACA

>D8PAK:00123:00884
GATTAATCGTGGCCGGGCATACTA

>D8PAK:00124:00859
AACACAAGTGTATCGCAGGGAACA

>D8PAK:00124:00861
CTCTGGAATGTATTGAGGAACACA

>D8PAK:00124:00862
CTCCCAAATGTGCCCTCGACTACA

>D8PAK:00124:00863
TTGTAATCCGGAATACATTTTGCC

>D8PAK:00124:00896
ATGATAACTGTGCCGTAAGCCACA

>D8PAK:00125:00859
TCGCAATTGTACGCTGGCTCACTT

>D8PAK:00126:00869
TTGTGTCCCACGATACATTTTTGG

>D8PAK:00126:00880
AGCAAGAATGTAGTCCGAACTACT

>D8PAK:00127:00853
TTTATATTGTAACCCTGACTACAC

>D8PAK:00127:00854
GCTGCAATTGTGCCTTACGTTACA

>D8PAK:00127:00868
TTTTATTTTGTGGGCTAGATTACT

>D8PAK:00127:00872
AGCACAATTGTGCTATAGGTCACA

>D8PAK:00127:00874
CAGGACATTGTATGCCCTAATACC

>D8PAK:00127:00897
TTCTTATATGTGAGTTAGAACACA

>D8PAK:00128:00865
GTTAGCATTGTGGGCTGGATTACA

>D8PAK:00128:00891
CATGAGACACCATCCAATGGTATA

>D8PAK:00129:00865
TAATCAAATGTCACCTAGAACACA

>D8PAK:00129:00874
TCTTGACTGTGCTCTACGTTACAA

>D8PAK:00129:00878
ATTCCAAATGTAACATAGAACACT

>D8PAK:00130:00899
ATTTAAAACGTGCCCTAGCATACT

>D8PAK:00131:00866
GTTAGGACTGTATTCGGGCATACA

>D8PAK:00131:00867
ATGTATTCCGTAATACACTGTTTA

>D8PAK:00131:00893
CCTCAGAATGTATGCCTGAGCACT

>D8PAK:00131:00894
TTGTATTGCACAATACACTTCTAA

>D8PAK:00132:00858
CTTTGCATTGTATCATGTGTCACA

>D8PAK:00132:00874
GGTAATTTCGTACTCTAGAATACA

>D8PAK:00132:00875
TATCACACTGTAAGCCGCGATACA

>D8PAK:00132:00877
CAACTGTGGCGCAGATCACAATAT

>D8PAK:00133:00852
GGTTCTATTGTAACCTAACGTACA

>D8PAK:00133:00862
GCATAATTGTAATCTGGGCCACAC

>D8PAK:00133:00866
CCGGCCTGCTCATCCGACAGGAGC

>D8PAK:00134:00864
AAGGATAACGTATCCTAGAATACA

>D8PAK:00135:00853
ACACCGATTGTACGCGTCAATACA

>D8PAK:00135:00887
CAAACCTGTGACCTACGCCACATT

>D8PAK:00136:00863
GCACTGTGTGACCTATGCTACAAT

>D8PAK:00136:00876
TACTAGATCGTGACTCAGAATACA

>D8PAK:00137:00868
AGTAAGATAGTGATCTAGGATACT

>D8PAK:00137:00869
AACAGAACTGTGTACCACGCCACA

>D8PAK:00137:00889
TTTAGGTTTGTGGGCTGTAATACT

>D8PAK:00137:00890
GTGTATGCTGGGTTACATTTATTG

>D8PAK:00137:00895
ATCCCACTTGTAGCTTGAGCTACA

>D8PAK:00138:00861
AATACTACTGTATCCCAGCACACT

>D8PAK:00138:00876
GAAATTGTATGCCAGACGACAGTC

>D8PAK:00138:00892
ACCTGTATCCTGGACTACACTTTT

>D8PAK:00139:00872
AACTACTTTGTCACTTGCACTACA

>D8PAK:00139:00880
TTGTATTCCATAATACAGTTACTA

>D8PAK:00139:00884
CGGTTTATAGTAGCCTGGACTACA

>D8PAK:00139:00896
CTGAATAATGTGGGCTACGATACA

>D8PAK:00140:00884
TCCCGAACTGTATTACATGGTACA

>D8PAK:00141:00885
TATGAAATCGTAGTACATGTTACA

>D8PAK:00141:00891
GATCTCTTTGTAACCCAGATTACA

>D8PAK:00142:00876
TCACAAGTTGTATCCTACACTACT

>D8PAK:00142:00889
CTTTCTTAAGTATTCCAAGATACA

>D8PAK:00144:00858
ATTTATTTGTGTGCTAGCATACAT

>D8PAK:00145:00858
CGATTGTAAGCAGGACTACATTCG

>D8PAK:00145:00882
AAGCTTATATCATCCTTAGCCCAC

>D8PAK:00146:00855
ACTTTAAGCTCATCCCTAAACTCC

>D8PAK:00146:00884
TAAAAAACTGTGCTACCGCTTACA

>D8PAK:00146:00889
CGAACTGTAGTCTAAGTCACAATT

>D8PAK:00146:00894
GTTTCGTTTGTATCTTAGAATACA

>D8PAK:00147:00858
ACCATCATTGTATCACGACATACA

>D8PAK:00147:00893
CAGTGAATTGTATCTTCGGTCACA

>D8PAK:00148:00881
ATTTAATTCGTATCCTGCCCCACA

>D8PAK:00148:00894
TTCTAAACTGTGATCGAGCATACT

>D8PAK:00100:00909
TTGTGCCGTGGCATACCATTCTTC

>D8PAK:00100:00914
GTTCGATTGTATTCTATGCTACCA

>D8PAK:00100:00924
TTTTGATTTGTAACCTGGTACACT

>D8PAK:00102:00922
ATATTTGTAGTCTGAAACACAATA

>D8PAK:00104:00914
TATTTCTCTGTGTCCTGTGATACA

>D8PAK:00105:00911
AAAAGAATCGTGCTCCCAATTACA

>D8PAK:00105:00944
CCTGAGTGTGGGCCAACATACGAT

>D8PAK:00106:00908
ATTAAGTATGTATGCTGGGCCACC

>D8PAK:00106:00909
TTGTATGCCAGTTCACATTCGCTC

>D8PAK:00106:00912
GCTTAAATTGTGTGCTATGATACT

>D8PAK:00106:00922
AAAAAATTGTGGCCCAGATTACCG

>D8PAK:00106:00935
CTTGAGACTGTATTGTGGGATACC

>D8PAK:00107:00910
ACATGAATTGTATCTAGTGTCACA

>D8PAK:00107:00915
TACAGATTGTAATCCGTAATACTT

>D8PAK:00108:00905
TTTCTCTTTGTATTCCTACATACA

>D8PAK:00108:00921
TCGACATTTGTGACCTGGACCACT

>D8PAK:00108:00926
ATCAGAAATGTGACCCATCTCACA

>D8PAK:00109:00941
AATAAAATCGTATTCAGCGCTACA

>D8PAK:00111:00923
AATCAATTGTGACCCGTGTCACAA

>D8PAK:00111:00933
CCATTCATTGTGTGCCCCAATACA

>D8PAK:00112:00904
CTTGAACTTGTATTCTACCCTACA

>D8PAK:00114:00901
CAAACGATTGTGCTCAGTGTTACA

>D8PAK:00114:00910
TTGTACGCTACAACACAATTCCTT

>D8PAK:00115:00915
CAAGTATTTGTAACCTAGGTCACG

>D8PAK:00116:00911
TTCTGGTTTGTATCTCCGGCCACA

>D8PAK:00116:00916
CAAGATTGTATGCTAGACCACAAC

>D8PAK:00116:00936
TACGGAAAAGTAATGCACGATACA

>D8PAK:00117:00903
CCCCGTACTGTATGCGAGGCCACA

>D8PAK:00117:00913
CGCTCAACTGTGACTTAACATACA

>D8PAK:00117:00924
GCCCGCATTGTAACCTGTAATACA

>D8PAK:00119:00907
ATCAAACTTGTAGGTTAAGATACA

>D8PAK:00120:00936
CTGCACTCTACATCCGGGCCTATA

>D8PAK:00121:00912
ACATCAAGTGTAACTCAGCGTACA

>D8PAK:00122:00919
GTGTATTCTGGATTACACAATGTG

>D8PAK:00122:00922
CGGAAATGTACGCCACAACACAGT

>D8PAK:00123:00924
AATATCTTTGTATTGCAAGCTACA

>D8PAK:00123:00930
GCGTCAATCGTGCTCCGTGTTACA

>D8PAK:00123:00937
TCAATTGTGATCCTTAATACATTC

>D8PAK:00123:00947
TTACGAAGTGTGTGCCGGAGCACA

>D8PAK:00124:00901
CAACGGTTTGTACCCTTGAATACA

>D8PAK:00124:00908
CTTACATTTGTACGCTACGTCACA

>D8PAK:00124:00948
CTGTGTTCTACACTACAATTCATC

>D8PAK:00125:00913
TTGTAGGCTACAATACAGTTGACG

>D8PAK:00125:00920
CGCTTAATTGTATGCTTTAATACA

>D8PAK:00127:00925
CATTAGATTGTGATGTGTCTTACA

>D8PAK:00128:00904
TTGTAGCTTATGCTACATTTCTCG

>D8PAK:00128:00906
TATGCGACTGTAGCCCCTGCTACA

>D8PAK:00128:00926
CCTTTGTATTGCAGGCTACATTTT

>D8PAK:00128:00930
AACGGTACTGTAGTCCCCGCCACA

>D8PAK:00129:00923
TAGATTACTGTTAAGTCAGACTAC

>D8PAK:00129:00931
GTAAAAATTGTGACCTACCATACT

>D8PAK:00130:00906
TCCGAAAATGTGGTAGCGAATACA

>D8PAK:00130:00907
TTGTAAGGCGGGTTACAATCTGTC

>D8PAK:00130:00915
TTGGGTTCTGTAGGCCATGTTACA

>D8PAK:00131:00921
GGCCATACCGTATTCCCGATTACA

>D8PAK:00131:00944
CTCTAATTTGTAGCCTAGGTTACT

>D8PAK:00132:00928
TTGTAATGTGTATTCCCGGTTACA

>D8PAK:00132:00932
TTGTGCCCTAGAATACAAAACAAC

>D8PAK:00132:00945
AAATGTGTAAGCTAGGTTACACTT

>D8PAK:00133:00903
AATATGATTCATCCTTAGGCCACA

>D8PAK:00133:00914
TCACAGATTGTAATCTTACATACA

>D8PAK:00133:00919
ACCCGCCTGCATCCCGCTCTGTTC

>D8PAK:00134:00913
GCACCAACTGTATTCGACGCTACA

>D8PAK:00134:00943
ATCTATTCTGTATCCTAGACCACT

>D8PAK:00135:00900
GATGTAATTGTATTCCTCATCACA

>D8PAK:00135:00909
ATACAATTGTGACTTAGGACACTT

>D8PAK:00135:00917
CTTGAGTTTGTAACCTGGGGAACA

>D8PAK:00135:00927
GTCTTCTCTGTAATTCAGGTTACA

>D8PAK:00135:00930
GTTAGGACTGTGGTTTGGGGCACA

>D8PAK:00135:00942
GAGGATACTGTGTGCTGGAGTACA

>D8PAK:00136:00926
TTAATTTTGTATGCTAAGATACAC

>D8PAK:00136:00941
CTTAAAATTGTATTCCATGCTACC

>D8PAK:00136:00942
TTGTGTCCCACGATACATTTTTGG

>D8PAK:00136:00944
TATAACTTTGTATTAAGCGATACA

>D8PAK:00137:00922
GACATTTTCGTGCCCCGGGGCACA

>D8PAK:00138:00935
GAACAGATAGTAATCTGCCTTACA

>D8PAK:00138:00948
TGTCTAAAAGTGTCCGGCAATACA

>D8PAK:00139:00903
CAAATAAATGTATGCTATGCCACA

>D8PAK:00139:00909
CAGACCCATCCACAATTGAGCACA

>D8PAK:00139:00930
TGATCAAATGTGCTATAGATTACA

>D8PAK:00140:00901
GTCAGCAATGTATACTGGCATACA

>D8PAK:00140:00905
GACTACTATGTGTCCTAGCATACA

>D8PAK:00140:00931
TATTCAATTGTAATCCAGCATACC

>D8PAK:00140:00935
ATGTAATCCAGGGCACATTCTCTC

>D8PAK:00141:00939
CCACAAATTGTAGTCTCTACCACA

>D8PAK:00142:00909
GATCAGATTGTATTCTGCATCACT

>D8PAK:00142:00947
GTTATGATTGTGGTGTACGACACA

>D8PAK:00143:00906
GTGTATGCCAGCCCACATTATTTG

>D8PAK:00143:00927
TATGGATTTGTAGCTCCGGTCACA

>D8PAK:00143:00929
TTGTAGCATGAAATACAATTACGG

>D8PAK:00143:00931
TCCTAAAATGTGCTTCCCGATACA

>D8PAK:00143:00937
TTGTATCGTGCACTACTTTTCGTA

>D8PAK:00143:00943
ATAACGATTGTGGTGGGGCTCACA

>D8PAK:00143:00945
TTGTGTCCTAGCCTACTGTTCAAA

>D8PAK:00144:00913
AATCTCTTTGTATGACTCATTACA

>D8PAK:00144:00936
TGAAATGTGGCCCATAATACATAT

>D8PAK:00144:00940
ATCCGGAATGTAGTATGTAATACT

>D8PAK:00145:00913
AAAGAGATTGTATCCTATGACTCA

>D8PAK:00145:00917
AGGTGTAGTCTGGATCACAATTAT

>D8PAK:00145:00920
CAGTTAATTGTGTTCTGCGTTACA

>D8PAK:00146:00921
TTGTATTCCGGAGCACAGTGTGGC

>D8PAK:00147:00923
CCAGAGATTGCATGCTAGAGCACA

>D8PAK:00148:00913
CCTCTGACTGTGGCCGGGCCTACA

>D8PAK:00148:00923
CACCGAACCGTGTGCTGGACTACA

>D8PAK:00148:00925
TCATGACTTGTATTCCTCACTACA

>D8PAK:00148:00948
GCTTGAATAGTATCCCAGATTACA

>D8PAK:00107:00953
TAGAATGTGATCTAGGCCACTATA

>D8PAK:00114:00961
GACTCAACTGTACGCCTCGCCACA

>D8PAK:00114:00965
TCCTTAATTGTATCATAAGTCACA

>D8PAK:00115:00952
ATTAGCTTTGTATTTCTCGTCACA

>D8PAK:00115:00966
ATCACAACTGTGCCCCTTATTACA

>D8PAK:00116:00951
TCCCGTGCGCCATCCTTACTCTAA

>D8PAK:00116:00956
GGGCTGATTGTACGCTGGGCTACT

>D8PAK:00116:00961
AACCGTGTCGTGGACTACAAATTT

>D8PAK:00117:00965
CAGTGCTAATCATCCGGACTAACT

>D8PAK:00117:00966
ACGGAAAATGTATCCGAAGTCACA

>D8PAK:00118:00961
CGTAGGTTTGTATGCTGAATTACA

>D8PAK:00119:00960
TAGTGTATGTCATCCACGATGCGC

>D8PAK:00120:00967
ACCTAAAATGTATACGAGCATACA

>D8PAK:00121:00967
ATTTGATTTGTAATTGAAGACACA

>D8PAK:00123:00969
TTGTGTTGTACAATACAATTCGGG

>D8PAK:00123:00976
CACCAAAATGTACTCTGGCTTACA

>D8PAK:00124:00960
TGTTTGAATGTATTGTACACTACA

>D8PAK:00125:00977
AACACAACTGTATCCTAAGCTACG

>D8PAK:00126:00966
ACTTCTATTGTATTATAGAATACT

>D8PAK:00126:00973
ACTTTAATTGTAATCTATAATACA

>D8PAK:00127:00955
ATTATCATTGTATTCTGCGCTGCA

>D8PAK:00129:00951
GTGGTCTTTGTGACCTGCCTCACA

>D8PAK:00129:00956
GTTCTCTTTGTACCCTAAACTACA

>D8PAK:00130:00961
GATAATTGTATTCAGACGCTACAT

>D8PAK:00130:00963
CCAAAGTTTGTGTCGCAAGTCACT

>D8PAK:00130:00982
CTCCATGCATCCGTCTCCAGGCTA

>D8PAK:00131:00961
TCAACAATTGTGAGCCCCGCTACA

>D8PAK:00131:00990
AACTGAATTGTAATCAGCGCCACT

>D8PAK:00132:00969
CCTACCTCTTCATCCACCAGGTTG

>D8PAK:00133:00950
TCACGAATTGTATCTGAAGTCACA

>D8PAK:00133:00977
CACAAGTGTAACCCCAATCACAAT

>D8PAK:00133:00988
GGGTAGATTGTATGCTAGCTGACA

>D8PAK:00134:00971
TTGCCTTTGTAACCTATGATACAC

>D8PAK:00135:00953
TCCTGGAGCTCATCCTACTTGCGT

>D8PAK:00135:00956
TTCGCGTTTGTATCCTAGAACACA

>D8PAK:00135:00978
GTCGAAAATGTAATGCCTACTACA

>D8PAK:00136:00958
GCCCTAATAGTATGCCCTATTACA

>D8PAK:00136:00987
ATTCTTATTGTATTCTCCGCTACA

>D8PAK:00136:00991
TAACACTGTATGCCGGCGTACAGT

>D8PAK:00137:00960
TCGAAGAATGTACTGTGGCTTACA

>D8PAK:00137:00968
GCCAATTTTGTGACTTCCAATACA

>D8PAK:00137:00999
ATTGACATTGTATCACTGCACACA

>D8PAK:00138:00968
TATCTATATGTATCACGGGCCACA

>D8PAK:00139:00958
TTGTAATCCAGCATACGGTTGGTG

>D8PAK:00139:00963
GTGGCAATTGTGACCTAGCATTCA

>D8PAK:00140:00980
TTGTAACGTGGACCACAATGCCAC

>D8PAK:00142:00971
TTGAAATTTGTATTGCCGCATACT

>D8PAK:00143:00957
ACGGACATTGTATCTTACGCTACT

>D8PAK:00143:00965
TTTAAAAACGTACTCTTGAATACA

>D8PAK:00145:00979
TGAGACATTGTATGCTGGGAAACA

>D8PAK:00146:00967
ATACCAATTGTATCCTGTATTACG

>D8PAK:00146:00978
ACATTCTTTGTGTGCTGGCCCACA

>D8PAK:00146:00984
GACGAGATTGTATGCTGGCATTCA

>D8PAK:00146:00991
ATCTCAAATGTGCTCCTAATTACA

>D8PAK:00148:00961
TTGTAGATTGTGATTAGGATTACA

>D8PAK:00148:00979
TTGTGAGCCCGGTTACAATGTCTC

>D8PAK:00148:00989
TCCTGGACTGTAGTGTCTAATACA

>D8PAK:00148:00990
GAAGAATTGTGGTCTAAGACACAC

>D8PAK:00148:00994
AGTTCATTTGTACGATAGGCCACA

>D8PAK:00148:00997
CGGCGGATTGTATTCCAGACTACT

>D8PAK:00149:00950
TTGTGTGCTAGGCTACATATCGGA

>D8PAK:00149:00986
GAGCTAATTGTGGTGTAACGTACA

>D8PAK:00142:01002
TCTACAATTGTCACCGCGAATACA

>D8PAK:00143:01011
GACGCAACTGTGGTTTACACTACA

>D8PAK:00144:01005
CCCTTAATTGTATGTTAGCTTACT

>D8PAK:00145:01005
TTGTATTGTAGCTTACATTTCTGG

>D8PAK:00145:01008
TCCCGGTATGTATGCTAAGATACA

>D8PAK:00147:01001
GGTAGCCTTGTAGCCTGGCCCACA

>D8PAK:00149:01007
CCATAACTGTATTATGGGTTACAG

>D8PAK:00150:00008
GGTTTACACTCATCCATACTACGT

>D8PAK:00150:00039
CTGGTAAATGTATCCCAGTACACA

>D8PAK:00152:00007
ACTCGGATTGTAGCTTATAATACA

>D8PAK:00152:00036
TAACATTGTAGCCCAGCATGCATT

>D8PAK:00152:00044
GTGAGTTGTAGTCCAGCATACAAA

>D8PAK:00152:00047
TGTCGAATTGTGATACAAACTACT

>D8PAK:00153:00018
TGCTGAAATGTGTTCCATCACACA

>D8PAK:00154:00006
TATTCTGTATGCGAGAATACAATC

>D8PAK:00154:00015
TTCGAGTTTGTATGCAGGGTTACA

>D8PAK:00154:00049
ATAGCAAGTGTATTCCGGCTTACA

>D8PAK:00155:00008
ATTAAAATTGTGCTTCACACTACA

>D8PAK:00155:00018
TTGTGTCCTACCATACAACTGGGT

>D8PAK:00155:00046
CGCTGTGTAGCCTGGCGTACAATG

>D8PAK:00156:00008
GATACGACTGTAAGCTACGACACT

>D8PAK:00156:00032
TTATACTTTGTGATCTAATCCACA

>D8PAK:00156:00044
GAATCGAAATGTATCTTGCGTTAC

>D8PAK:00157:00017
CTTTGGACCGTATCCCAGGCGACA

>D8PAK:00157:00030
GTAACATTGTAGCCGCGGCTACTA

>D8PAK:00158:00005
TACACAATTGTAACCCCCAATACA

>D8PAK:00159:00005
CTTTTTTTTGTAACCTTGGCTACA

>D8PAK:00159:00036
AAGATTGTAAGGCAGACTACGTTG

>D8PAK:00160:00031
ATGTGAAATGTCACACAGATTACA

>D8PAK:00160:00039
TTGCGACATGTATTCCTGAATACA

>D8PAK:00162:00007
CTCTAAATTGTAATTCTGCCTACA

>D8PAK:00162:00014
TAAAATAGTGTATTCAGGAGCACA

>D8PAK:00162:00033
TCAAAACTGTATTGTATCATACAT

>D8PAK:00162:00036
TTGTATTCTCAATTACAAACTCCT

>D8PAK:00162:00044
AAGATTTTGTAGCCTTGCATACAA

>D8PAK:00163:00022
ACACCGATTGTATCGTACGTTACA

>D8PAK:00164:00024
ATGTAGCGAGGAATACAGTCGCTA

>D8PAK:00164:00037
GCTATAAGTGTGTCTTAGCATACA

>D8PAK:00164:00039
AAGCGTTTTGTAATCCATCTTACA

>D8PAK:00164:00043
ATTAAGTTTGTAATGCGAAGCACA

>D8PAK:00165:00013
GCCCCTTTTGTAGCATGGCGTACA

>D8PAK:00165:00015
CTTTAGACTGTGCCCAGGAATACA

>D8PAK:00166:00043
CTTAAGATTGTATCTTGTATTACA

>D8PAK:00167:00024
CCAAAGTTTGTGACCTCTATCACA

>D8PAK:00168:00036
AATGCTTAAGTGGTCCAGACTACA

>D8PAK:00168:00041
TAGTCCACTGTAGGCTGCAGCACA

>D8PAK:00169:00032
TAAAAATTTGTACTCTAAGATACT

>D8PAK:00170:00018
TCTAAGAATGTAGTCTGGAACAAT

>D8PAK:00170:00036
GCCAACTTTGTACTCTACGATACG

>D8PAK:00171:00029
TTTAAAATTCGTATGCCAACTACA

>D8PAK:00171:00038
GCCTTAATCGTGACCCTGGATACA

>D8PAK:00172:00008
TTACAATTGTAGCACGGGCCACAT

>D8PAK:00173:00008
TAAATTTTCGTATCCTGGCGTACT

>D8PAK:00173:00021
CAACCAATTGTATGACCGAGTACA

>D8PAK:00173:00039
TAAATTGTGACCCATGCTACAATC

>D8PAK:00173:00043
CTATGAATCGTAAGATGAATTACA

>D8PAK:00175:00037
ATTGAAAATGTATCCCCAGCCACA

>D8PAK:00176:00005
TCCGAAGCTGTATTGGGGAATACA

>D8PAK:00176:00014
TAGTGCCCTGTATGCTAGGATACA

>D8PAK:00176:00040
AAGATTTTGGTAGTGTGGACTACA

>D8PAK:00177:00035
CCGTGATTTGTAGCCACGCTTACA

>D8PAK:00177:00047
TTCCTATTTGTACTACACACTACA

>D8PAK:00178:00013
CCTCAAATGTATCTCAAGACACAT

>D8PAK:00178:00041
ATGTGTGTCCCAGGCTACAAAGCC

>D8PAK:00179:00025
CACGAATCTGTGTCATAGAATACA

>D8PAK:00180:00009
CTCGAATTGTAAGCTAGGATACAT

>D8PAK:00180:00042
GAAACTGTACCCTGCGATACAAAG

>D8PAK:00180:00043
TCCACAAATGTAGGGGGGAATACA

>D8PAK:00181:00010
TTCGACTTAGTATTGAGGACTACA

>D8PAK:00181:00018
CGTTGTTGTTATTCTACAACTACT

>D8PAK:00181:00020
ATTCCAAATGTGACACAAGATACA

>D8PAK:00181:00032
GACAACTCTGTGTCTTGAACTACA

>D8PAK:00182:00004
ATGTGATCTGTAATACATTTGTCC

>D8PAK:00182:00019
TCTAGATTTGTATTCCCGCCTACA

>D8PAK:00182:00027
AAATTTATTGTGACCTGTGTCACA

>D8PAK:00182:00035
TTGTGACCTATCTCACTTTTTGCG

>D8PAK:00183:00016
ACTACAATTGTAAGATACACTACA

>D8PAK:00183:00046
CATTCCAAATGTGTTTCAGCGTAC

>D8PAK:00184:00038
TATTGCATTGTGCCCTGTGTTACT

>D8PAK:00185:00030
TTGTGATCTGGACCACAGAGACGC

>D8PAK:00186:00006
TTCTAGATAGTATCCTAGACTACA

>D8PAK:00186:00015
AGGCAGTAAGTAATCCGCCATACA

>D8PAK:00187:00005
TACCGAATTGTAGTCCCCGCTCCA

>D8PAK:00187:00032
AGCTGCGCCCCATCCATCCTATAC

>D8PAK:00188:00005
CCTGCGATTGTGGGAGAGCATACA

>D8PAK:00189:00023
CTTTGGAATGTATTTCAGGATACC

>D8PAK:00189:00040
AAAAATTTTGTATCCGACACTACA

>D8PAK:00190:00019
AGCACAATTGTGCTATAGGCCACA

>D8PAK:00190:00024
ATGGTCCTCCCATCCGTTTTTACT

>D8PAK:00191:00009
CCTTAGAATGTGTTCTCCGCTACA

>D8PAK:00191:00018
ACCATCATTGTATCACGACATACA

>D8PAK:00191:00019
ACCCAAAAGTATTACAGAATACAT

>D8PAK:00191:00034
ACGTGTCCTGGCATACAATTTGTC

>D8PAK:00192:00009
CTGTAGCGTGCGCTACTATTCTAA

>D8PAK:00192:00013
TTTCAAGCGCCATCCGAACCTTCG

>D8PAK:00192:00025
CAATAAAATGTAATTTGGGCTCCA

>D8PAK:00192:00042
TTATAAAATGTATGCGTCGCCACA

>D8PAK:00193:00019
AAAAACTTTGTTATTTGCGATACA

>D8PAK:00193:00020
TCTTGAATTGTAGTCCAAGCCACT

>D8PAK:00194:00005
CCAGTCATTGTATCCTACACTACT

>D8PAK:00194:00027
TCCATATTCGTATGCCAAGTCACA

>D8PAK:00194:00039
ACACATTCTGTGTTACAGCATACA

>D8PAK:00194:00042
TTTGAAATTGTATGCGGAAGTACA

>D8PAK:00195:00024
ACCGAAATGTATTCCGGGTTACAT

>D8PAK:00195:00029
ATAACAATTGTAACCTGCGTCACT

>D8PAK:00196:00018
ATCTAACATGTATGTTGGATTACA

>D8PAK:00196:00019
GTGGGCAATGTGGCCTAAATTACA

>D8PAK:00196:00048
CCTGTAAAAGTAACCTGCGTTACA

>D8PAK:00198:00008
GGTCAGATTGTAACTCAGCATACT

>D8PAK:00198:00031
TGTCGATTGTGTTCCAGATCACAC

>D8PAK:00198:00043
CCCTCAATTGTGGCCTCCACCACA

>D8PAK:00199:00005
TGGGCAACTGTATTCCCGAACACT

>D8PAK:00150:00050
TATGTAGTCCAGCCTACAAACTTA

>D8PAK:00151:00051
GTCCAGATTGTACTCCCTAATACA

>D8PAK:00151:00056
TTTCAAATCTTATGCCAGCCTACA

>D8PAK:00151:00075
CAACTGGTAGTGTCGATGGCTACA

>D8PAK:00151:00093
CCCGAAACCGTAGCCTGGAATACT

>D8PAK:00151:00099
TTAGTTATTGTAGTCCGCCTTACA

>D8PAK:00153:00081
GTGTACGCTGCGCTACAATCATCG

>D8PAK:00153:00084
CTCAACATTGTATGGAAGGGCACA

>D8PAK:00154:00091
ATGTATGCCACATCACAATTTTCA

>D8PAK:00156:00072
TTCTCAATTGTAGTCTGCCGTACG

>D8PAK:00157:00052
ATCGTAATTGTACTCTGGCCCACT

>D8PAK:00158:00053
ACCTTTCATCCGTCCTCTCGGCGC

>D8PAK:00158:00072
AAGTGTGCCAGCCTACAATCCGAA

>D8PAK:00158:00077
GCACAAATGTAGCTCATAATACAC

>D8PAK:00158:00078
ACGTCAACTGTGTTCAGTATTACA

>D8PAK:00158:00095
CGTTGAATAGTGGCCTGTACTACT

>D8PAK:00159:00091
CCTTAATTGTGTCCTGCGTCACTA

>D8PAK:00159:00097
TTGTATCGCACGACACTTTTTCCA

>D8PAK:00161:00087
CCAGCGATTGTATCTGAACCTACA

>D8PAK:00161:00099
CCCACAATAGTACTCTAGAATACA

>D8PAK:00162:00056
AAAATTTGTGATCTCGCATACACT

>D8PAK:00162:00057
TTGGGAAATGTATCACGTCGTACA

>D8PAK:00162:00096
AGCGCGAATTGTACTCTAGATTAC

>D8PAK:00162:00098
CCATCCAATGTAGGCTAGACTACA

>D8PAK:00162:00099
CATTCAATTGTACGCTACCTTACA

>D8PAK:00163:00091
ATGTGCCGCAGCATACATATTTTA

>D8PAK:00164:00053
CGCAACGTAGCATCCTCCGGTAAT

>D8PAK:00164:00056
CAAGCGAGTGTATTCCACAATACA

>D8PAK:00164:00074
TGGCAGTTTGTATGCCATCCTACA

>D8PAK:00164:00083
TTGTAAAATGTGCTCAGCATTACA

>D8PAK:00164:00084
TGAGCAATTGTGATATGAGTTACA

>D8PAK:00164:00085
AACATAATTGTATTTTACAATACT

>D8PAK:00165:00064
TATTGTTTGTGTCGCAGGTCACAT

>D8PAK:00165:00087
ACCCGATAGTGATGCAGAATACAT

>D8PAK:00165:00094
TTTCACTAAGTAGTCTAAACTACA

>D8PAK:00166:00050
TTACGGAATGCATTCCAGCTTACA

>D8PAK:00166:00052
GAATCGAATGTACTCTGGCACACA

>D8PAK:00166:00070
TCTATCTATGTAGTCTGCGATACT

>D8PAK:00166:00073
TTGGGAAATGTATCACGTCGTACA

>D8PAK:00167:00076
CAGATAGTGTCTTGCAATACAATC

>D8PAK:00167:00085
ATGAAGTGTAATGTACGTTACAAT

>D8PAK:00168:00050
TTGTAGCCCCTATTACTATTATCC

>D8PAK:00168:00058
ACCTGACTGTAACCCACCCTACAT

>D8PAK:00170:00063
TGTCCAATGGTATGCGCGCATACA

>D8PAK:00171:00083
TGATAAATTGTGCCCCATCTCACA

>D8PAK:00172:00061
CATGACTTTGTAATCCTGCATACT

>D8PAK:00172:00081
ATGTAACCCATACTACTATTCCCG

>D8PAK:00174:00091
CATAAATTGTTGTGCAGCATACAT

>D8PAK:00175:00050
TTGTATTCACTAATACAGTTTGGT

>D8PAK:00175:00052
AGGTGGATTGTGCCCTGGACTACT

>D8PAK:00175:00099
CCACCGATTGTATCCTTAGGCACA

>D8PAK:00176:00068
TATAAAAATGTAGCGTGGATTACT

>D8PAK:00176:00093
TTCTTCATTGTATCATGGATTACA

>D8PAK:00176:00095
GACACGAATTGTATGGCTGGATAC

>D8PAK:00177:00077
AAACTGATTGTGTCGTGGGTCACT

>D8PAK:00178:00065
AAATCTAATGTATGTTAGAATACA

>D8PAK:00178:00070
TACGTGATTGTAGCCTACGCTCAC

>D8PAK:00178:00078
CCTCAGAATGCATCCCTCACTACA

>D8PAK:00178:00086
TTTAGGATACCATCCGGTTTAGGT

>D8PAK:00179:00072
TTTTCCAATCGTACGCTACGTCAC

>D8PAK:00180:00062
ACTGTCTCTGTAGGGCAGCGCACA

>D8PAK:00180:00067
ATATAGATTGTATTCCCGCTTACT

>D8PAK:00180:00075
ATCTCATTTGTGTCCAGGGCTACA

>D8PAK:00180:00083
CCTCGATTGTGTTCTGGCCCACAT

>D8PAK:00180:00095
TCCACGTCTGTGGTCTAGAACACA

>D8PAK:00181:00060
ACTAACCACTCATCCGTAATTCTT

>D8PAK:00181:00068
TCATATTTTGTACGCTACGCTACA

>D8PAK:00181:00099
GCCGAATTTGCATGCTGAGCCACA

>D8PAK:00182:00061
CAAAAGATTGTACGATAGAACACG

>D8PAK:00182:00073
AAGCAAAAAGTAGTCCGTGTTACA

>D8PAK:00182:00095
ATTCGAATCGTATTGTGGATCACA

>D8PAK:00183:00052
GCTGTTTTTGTAACCGTAGTCACA

>D8PAK:00183:00061
TTGTAACCCACATTACATTGATTC

>D8PAK:00183:00092
AAAACAAAAGTAGCCTGAATTACA

>D8PAK:00184:00089
TGAGCAATTGTGGCCCAGCCTACT

>D8PAK:00185:00061
ACTTTGTAACTCAGGGCACATTTT

>D8PAK:00185:00096
TACCACACTGTATTCTGGGCTACT

>D8PAK:00186:00062
TTGTATGCTGGCATACTGTGTATT

>D8PAK:00186:00072
CCCAAACTGTGTCCCAGCATACAG

>D8PAK:00186:00092
TTGTATCACGGAATACATTGTAGG

>D8PAK:00187:00063
TTGTATCCCTGCTTACACACTTTA

>D8PAK:00187:00068
CGATAGATTGTATTCGCAACCACA

>D8PAK:00187:00099
AATTGTGTAGTCTCTGATACAATC

>D8PAK:00188:00075
GACTACATTGTGACTTAGCATACT

>D8PAK:00190:00085
AAATGTGTGTACCAGGGCACAATG

>D8PAK:00190:00099
GAATTTCTGTAGCGTACCCTACAT

>D8PAK:00191:00052
AACCGAATTGTATGATGCCTCACT

>D8PAK:00191:00079
TTGTAGTTGGCAATACAAATCCCC

>D8PAK:00192:00056
TTTAAAACTGTAATACTAGATACA

>D8PAK:00192:00062
TTGTATTCTCAACTACAGTTCTTC

>D8PAK:00192:00076
GAAAATGTGGGCTATCATACATTT

>D8PAK:00192:00090
TTGTATATTGTATTGTAACATACA

>D8PAK:00192:00093
CACGATTGTAATGTGAAATACCAA

>D8PAK:00193:00092
ATGTGTGCCAGCATACAAAGTTCT

>D8PAK:00194:00064
AACTCTAATGTAATCAGGACTACA

>D8PAK:00194:00080
CAATGTATTCCAACATACATTCCA

>D8PAK:00194:00090
TTGTAATTTAAATTACAATCCTAT

>D8PAK:00195:00050
AATTAATTTGTATTCCAGCACTCT

>D8PAK:00195:00058
CCTTAACTTACATCCTGTTTACGA

>D8PAK:00195:00078
CAGTTAATTGTGTTCTGCGTTACT

>D8PAK:00195:00086
CTCTACTATGTAACGCAGCCTACA

>D8PAK:00195:00092
GGAGCGAGTGTACTCCACGCTACA

>D8PAK:00196:00071
ATGAAAAACGTATGCCTCATTACA

>D8PAK:00196:00075
ATTGTAATAGTATCCTATGTCACA

>D8PAK:00196:00083
ATGTCGTTTGTATGCTAGACCACA

>D8PAK:00197:00050
CAATATACCGTATCCGGGGTCACA

>D8PAK:00198:00072
TTTTAAATTGTACTCTCACCTACA

>D8PAK:00198:00080
GATCACATTGTATCCTGGGTTACA

>D8PAK:00198:00086
TAAAACTAAGTATGCCCGACTACA

>D8PAK:00198:00095
ATCTGAACTGTGCCGTCCGTTACA

>D8PAK:00150:00106
ACACCAAATGTAAGACGCCATACA

>D8PAK:00150:00115
GAGATAACTGTATTCTAAGCTACC

>D8PAK:00150:00118
ATTCAGAATGTAACCCAAGCCACT

>D8PAK:00151:00108
ACCTCAATTGTGCTCTGTACTACA

>D8PAK:00151:00136
AGACCATCTGTAATCTGGCATACA

>D8PAK:00151:00138
AACTTAAATGTGTGGTACACTACA

>D8PAK:00152:00103
CCCCAGATTGTAACCTAATATACA

>D8PAK:00152:00109
ACCACATTTGTATTCTGCAGTACA

>D8PAK:00152:00115
TATGCGATAGTGCCCTACGCTACA

>D8PAK:00154:00113
CTCTTTGTGGTACAGCTTACAAAG

>D8PAK:00154:00121
TTGTAGTTCACAATACAATCCTTC

>D8PAK:00154:00124
AAAACGAATGTAAGCCAGAGTACA

>D8PAK:00155:00100
AACCAGATTGTGTCTGCGGTTACA

>D8PAK:00156:00102
CTAGAATTTGTGTTACCGCATACA

>D8PAK:00156:00125
AGGTGCTTTGTGGCCTGCCTTACA

>D8PAK:00157:00107
CTTATATCGACATCCTCCCGCGGT

>D8PAK:00157:00111
ATAGAGATTGTCAGCTATACCACA

>D8PAK:00158:00102
TTGTAGCCCAGGATACTATTCACT

>D8PAK:00158:00107
GGGGATTTGTAGCCTGCACTACGT

>D8PAK:00158:00127
TGTAAGACTGTATTCCTGCATACA

>D8PAK:00160:00136
TTATTAATTGTATTACAGCACACA

>D8PAK:00161:00145
TACATATTTGTATTCTAAACCACA

>D8PAK:00162:00105
TAGTATCTTGGGACACAATTGTCC

>D8PAK:00162:00138
ACATTTTTTGTAACGTATCTTACA

>D8PAK:00164:00108
CGAAAATGTAACCCTACATACATT

>D8PAK:00165:00117
TTGTATTCTATGGCACAATTGGCT

>D8PAK:00165:00149
ATGTGTCTTAGATTACAATTATCT

>D8PAK:00166:00114
AATCTCTATGTATTCCAACATACA

>D8PAK:00166:00120
GACTCAATTGTATTTCTCACTACA

>D8PAK:00167:00102
CCGAATTGTATTTCGCCCCACACT

>D8PAK:00168:00101
AATAATTGTGCTTTGCAACACAAA

>D8PAK:00168:00139
TGTTCATCTGTAGTCCGCATTACA

>D8PAK:00169:00129
GATTGATTTGTGATGTAGGTTACA

>D8PAK:00170:00134
GCACCACTTGTATGCTGGGCCACA

>D8PAK:00171:00123
AATGGCACTGTGTCCCCGGCTACT

>D8PAK:00173:00134
TCCCTAATTGTATTCCTGAATGCA

>D8PAK:00174:00107
TTGTGACCCAGGATACAATAGCCT

>D8PAK:00174:00131
ATCTTGCATCCGTTGTATTCCCAA

>D8PAK:00174:00133
CAATGTAAGCCAGACTACAATTCT

>D8PAK:00174:00145
TTATTTTGGTATCCTAGCTTACAG

>D8PAK:00175:00124
AACCTGTTTGTACTCCCTGATACA

>D8PAK:00175:00146
CGGTCGATTGTGACGCTAGATACA

>D8PAK:00176:00102
GCAAAGTCTGTGACTTGTGATACA

>D8PAK:00176:00134
CGCGATTTGTGTCCCAGGGTACAC

>D8PAK:00176:00139
TCATATTTTGTACGCTACGCTACA

>D8PAK:00176:00145
ATCGACTTTGTATCACACACTACT

>D8PAK:00177:00102
TTATGCATTGTATTGTTGCATACA

>D8PAK:00177:00118
CACCTAATTGTAGTCCACGCCACA

>D8PAK:00178:00108
ATCCCGCGCCATCCCTCTATAGAA

>D8PAK:00178:00122
TCACAGATTGTAATCTTACATACA

>D8PAK:00178:00143
TAAGTTTTGTATTCTAGATTACAT

>D8PAK:00179:00109
TTCCGAACAGTGACATAGACTACA

>D8PAK:00179:00130
ATGTGTCCCAGCTCACAAAGATAC

>D8PAK:00179:00131
ACGGAGATTGTATCCTGGGCAACA

>D8PAK:00180:00107
TTCCAAACTGTGTTCCAGACCCAC

>D8PAK:00180:00133
AATACGATTGTACTTTTCAATACA

>D8PAK:00181:00101
TAGGTAATTGTAGCCCCCGTTACG

>D8PAK:00181:00115
ATCAACCATCATCCTTAGGGACAT

>D8PAK:00181:00133
CCTATTTTGTAGCCCGCGGCACAC

>D8PAK:00182:00101
GAAAAGTTTGTAGGCCAGCTCACT

>D8PAK:00182:00121
TAGTACAATGTAGCACGCCTTACA

>D8PAK:00183:00100
CCATAACTGTAGGTTAGAATACAA

>D8PAK:00183:00109
CTCATTATTGCATCCTATAGCCCC

>D8PAK:00183:00133
TTGTGTCCCGTCATACTATTTAGC

>D8PAK:00183:00140
AAGTGTCCTGGACTACAATCGAAT

>D8PAK:00184:00102
TATGACTTTGTATCCTAGGCTTAA

>D8PAK:00185:00116
GAAGAAATAGTGCTGTGGCCCACA

>D8PAK:00185:00119
TGCAGAATACCATCCAGCTGATTA

>D8PAK:00186:00119
GGCTTGAATGTGGCTTAGGCTACA

>D8PAK:00186:00139
ATTGTATCGTAGCTTACAATCATA

>D8PAK:00187:00108
TTGTATTACAGACCACAAAGACCT

>D8PAK:00188:00101
GTCAAAATTGTCTGCCACGATACA

>D8PAK:00188:00130
GACCCGAAAGTATCCGTGCATACA

>D8PAK:00188:00149
GACTGTATGCTGTGCTACGTTTTT

>D8PAK:00189:00120
TTGTGGCCCAGCTTACATTTGATT

>D8PAK:00190:00110
TTGTGGCCCGGCATACAACGACTT

>D8PAK:00192:00102
TCTAGATATGTAACCTACGTTACA

>D8PAK:00192:00138
AATGGTTTTGTATCATAGAACACT

>D8PAK:00193:00104
TTGTAAGACGCGTTACAATCTTCT

>D8PAK:00193:00111
CTCATGATTGTAAGCGAGCTCACA

>D8PAK:00193:00139
ATCCGAAATGTGCCATAGCACACA

>D8PAK:00193:00142
AATTTTTTGTACTCCCGGATACAA

>D8PAK:00193:00144
ATACCCGTATCATCCCGTGGATAA

>D8PAK:00194:00110
TCGAAGTATGTAGCGTGTGTTACA

>D8PAK:00194:00120
TGGCCGATTGTATTACATGATACG

>D8PAK:00194:00121
TGAACCATTGTATTGCAGCATACA

>D8PAK:00194:00136
TGTTTAATTGTAGCACAAGCTACT

>D8PAK:00194:00149
ATGTAGGCTGCCATACATTTTTTC

>D8PAK:00196:00102
GTGTTAATTGTAAGCTCGACTACT

>D8PAK:00196:00106
GTGTAGTCTCGGATACAATTCAGA

>D8PAK:00196:00112
TATTTGACTGTATCCGGGCATACA

>D8PAK:00196:00117
GATGAAGTTGTGGCGCAGATCACA

>D8PAK:00199:00131
GATTACATTGTGGCCTGCGACACT

>D8PAK:00150:00154
CAGAACATTGTATGCCTGGATACG

>D8PAK:00150:00172
TTTGGTTTCTGTAGCCCAAGATAC

>D8PAK:00150:00173
TTGTATTCCCGCATACATTACCGA

>D8PAK:00150:00177
TGAACTGTAGTCCACGTTACACAA

>D8PAK:00151:00199
TTGTGGCCCAGAGCACTTTTCTAT

>D8PAK:00152:00172
ATTCAACTGTATCGGAGAATACAC

>D8PAK:00153:00163
AATCGGAATGTAATGCGGAATACT

>D8PAK:00153:00194
TTCCCGATTGTACTATGGCCTACA

>D8PAK:00153:00197
CCGCCTAGAGCATCCAGACACCCT

>D8PAK:00155:00157
CTCCTCACTGCATCCCATCGTTTT

>D8PAK:00155:00159
GAGCCGTTTGTATGTTGTCATACA

>D8PAK:00155:00191
TGAGCAATTGTAATACAGCATACA

>D8PAK:00157:00179
AAAAATTGTATACCAAGTTACAAA

>D8PAK:00157:00194
GGTTTTATTGTGTGCCGCAATACA

>D8PAK:00157:00196
ATTACGATTGTATGATATGTTACA

>D8PAK:00158:00154
GAAATACTGTATTCTGCATTACAT

>D8PAK:00160:00164
TTCGGATAGTAGTCTGGATTACAA

>D8PAK:00160:00195
ATGCACAAAGTATTCCACAATACA

>D8PAK:00161:00158
AATTCGTATGTAGTCTAGGACACA

>D8PAK:00161:00175
ATTTAGAATGTGTTCTCCAATACA

>D8PAK:00161:00176
TCTTAAAATGTAATACAGACTACT

>D8PAK:00161:00179
ACAACAATTGTATTCTACAACACA

>D8PAK:00162:00169
AAATGTATCCGGGCCCACACTTGT

>D8PAK:00163:00164
AAGTGAATAGTGTTCTCGGACACA

>D8PAK:00163:00170
TTGTGTTCCCAAATACAATCCATA

>D8PAK:00163:00180
GTGTGTATCCCATCATACAATCTT

>D8PAK:00164:00173
TTGTATCGCAGAGTACATTCTCGC

>D8PAK:00164:00178
TACACAGATGTATTCTGGCTTACT

>D8PAK:00165:00166
GTCTTAACTGTGTCATGACATACA

>D8PAK:00166:00154
ACGGAAATGTGACCTATGTTACAA

>D8PAK:00166:00170
GACCACACTGTATGCTACATTACT

>D8PAK:00167:00164
GGATATTGTAGCACAGCCTACTAA

>D8PAK:00167:00170
AACGCAACTGTGGTTTACACTACA

>D8PAK:00167:00199
ATGTATTCCGTACTACAATCGGAT

>D8PAK:00168:00151
CACTTGATTGTATCCTGGTGCACT

>D8PAK:00169:00154
AACCAAAAAGTAAGCTATCATACA

>D8PAK:00169:00159
AATCCATTTGTAGTCCACACTACT

>D8PAK:00169:00174
ATGTATCCTGCACTACAATTGCAT

>D8PAK:00171:00156
GTAACGATTGTGGTCCACCTTACA

>D8PAK:00171:00177
AACTTGTATGCCAGCTTACAATTT

>D8PAK:00171:00179
ATATTGATTGTACGCTCCACTACA

>D8PAK:00171:00188
GCCATCTTTGTATCTCAGAATACA

>D8PAK:00173:00150
TAATCAATTGTACTCTGGCTCACT

>D8PAK:00173:00187
CCCTACTAGTCATCCGACCTTAGC

>D8PAK:00175:00156
ATTGGGTTTGTAATCTGCGCTACT

>D8PAK:00175:00167
CTGTTATTTGTAACCTGGGTCACC

>D8PAK:00175:00174
AATTGCATTGTACGTCCGAATACA

>D8PAK:00175:00190
TTATCAATTGTATACCAAGCCACA

>D8PAK:00176:00158
GAATTAATGGTATCCCAAGCTACA

>D8PAK:00176:00182
CGTAATTGTGTTCCGGGCTACTAA

>D8PAK:00176:00195
CTCCAAATTGTATGCCATGCTACT

>D8PAK:00178:00156
ATCCACGCCCATCCTGTTCTTGCC

>D8PAK:00178:00164
GTATACTTTGTATTCCCTGCTACA

>D8PAK:00179:00175
GCTATCTTTGTAGCCTAGCATATA

>D8PAK:00179:00181
GGCATCTTTGTAACCTGACCTACA

>D8PAK:00179:00192
CAAATTGTAGCCTGGCATACATCT

>D8PAK:00179:00193
AACTGAACTGTAATTGGGCCCACA

>D8PAK:00180:00154
TCCGAGACTGTGTGCTACAATACT

>D8PAK:00180:00159
TAATATGTGCCCCAGCATACATTT

>D8PAK:00180:00167
CCCCAAATTGTATGATACGCTACT

>D8PAK:00180:00172
CTCAAAATTGTATCCGAGCCTTCA

>D8PAK:00180:00184
ATTATCACTGTAATTCAGCATACA

>D8PAK:00181:00157
TTGTGTCCTAGCTTACTATTGGCC

>D8PAK:00181:00164
ATGCAGAATGTGAGGTGGCATACA

>D8PAK:00181:00165
CTTGGATTGTAGTGTTGACTACAT

>D8PAK:00181:00166
AACTCATTTGTAGCGGAGAATACA

>D8PAK:00182:00159
AAACATACTGTGCTTTGTAATACA

>D8PAK:00183:00189
TACCAACATCCGCATCTGGCAAAT

>D8PAK:00184:00168
TTAGCACCTGTATGACACAATACA

>D8PAK:00184:00170
ACGACTAATGTAATCCACACTACA

>D8PAK:00184:00173
GTTTCGTTTGTATTCTGGGTTACT

>D8PAK:00184:00196
ACACCAACTGTATTTCCTGTTACA

>D8PAK:00185:00151
CAGTTAATAGTATCTTAGCCTACA

>D8PAK:00185:00167
CCCATCTCCGCATCCTATGCCTAA

>D8PAK:00185:00193
AATTCGATTGTAGTGGAAATCACT

>D8PAK:00186:00166
TTATCAATTGTATTCTCTCATACT

>D8PAK:00186:00174
CGAATTGTAGTGTAGATTACACAT

>D8PAK:00186:00177
TCCATAATTGTAACGCAGGCTCAT

>D8PAK:00186:00190
ATGTTATTCGTATTCTAGGGCACA

>D8PAK:00186:00193
ACCGTTATTGTATTACATGCTACA

>D8PAK:00187:00157
GTTTATCCTGTATCCTAACCTACA

>D8PAK:00187:00160
CACTCTTTTGTATGCCTTCTTACA

>D8PAK:00187:00194
TTTAAAAACGTGCTCGGGGATACA

>D8PAK:00189:00159
AAGTAAATTGTATTCGCAGTTACA

>D8PAK:00189:00163
AATTCCATTGTATTCTGTACTACT

>D8PAK:00189:00177
GCTAGAGTGTACGTCAGCCTACAC

>D8PAK:00190:00161
TGTAATTATGTAAGATGGGCTACA

>D8PAK:00190:00191
TCCGCTTTGTATCCCCGCATACAG

>D8PAK:00192:00165
AGAGACTTGTAGTCTAGCCTACAT

>D8PAK:00192:00187
ACCATGCCTGTATGCCAGACTACA

>D8PAK:00193:00165
CTTCGTAATTGTAGTGTTGACTAC

>D8PAK:00193:00192
GAATCAATTGTGGCTTATCTCACA

>D8PAK:00194:00156
TGCAACATTGTGTCCTGGCCTACA

>D8PAK:00194:00163
TAATGAGTGTGTGCCACGTTACAT

>D8PAK:00194:00190
ATAAGAACTGTGCCTTGTGCTACA

>D8PAK:00195:00167
AGTCCTTCTGTATGCCCGGTTACA

>D8PAK:00195:00174
ATACGAACTGTATCGCAAGATACA

>D8PAK:00195:00189
GCAAATATTGTAGTCCTTACTACA

>D8PAK:00196:00164
CCCTAGAAGTAGTCACGCCTTACA

>D8PAK:00196:00172
GGTTGAAATGTATTCCGCATTACT

>D8PAK:00196:00178
AATTAGATTGTATCGTCAAATACA

>D8PAK:00196:00192
AAATACTTTGTGATCGGTGTTACA

>D8PAK:00197:00163
ACCACAAATGTATTCTAAAGTACA

>D8PAK:00197:00181
CCCATAATTGTATGCTGCATTACT

>D8PAK:00197:00185
AGTTATACTGTGCCCCTGAATACA

>D8PAK:00197:00198
TTTTAGACTGTGACCACGAACACA

>D8PAK:00198:00150
TGATACACTGTATCCCCACATACA

>D8PAK:00199:00155
TTCCTGCATCCGGGTCTTTCCAAT

>D8PAK:00199:00169
ATTTAAATTGTACCTTGGCTTACA

>D8PAK:00199:00172
ATGTATACTGTATCGTAGACTACA

>D8PAK:00150:00232
TGATTTATTGTGCTCCCAGCCACT

>D8PAK:00150:00235
CAACAACTGTGACTCAGGATACAG

>D8PAK:00151:00226
TATGAGACTGCATCCTAGCATACT

>D8PAK:00153:00210
TAAAAAAGTAATCTAGCATACCGT

>D8PAK:00153:00218
GAGACAATTGTAATACGGAGCACA

>D8PAK:00153:00222
CAAGCTATTGTAGCTTGGCATACA

>D8PAK:00154:00222
CTTGCGTCCATCCTATGTAGCCTA

>D8PAK:00155:00210
TTATGTATTGTGCCCTGTGTTACA

>D8PAK:00155:00239
GCCTATTCTGTAATCCTAACTACA

>D8PAK:00155:00249
CAGTAGACTGTAGCGCATACTACT

>D8PAK:00156:00227
TCTCAGATTGTACGCTGAGTTACT

>D8PAK:00156:00232
TTACTGATTGTATCTGTGCATGCA

>D8PAK:00157:00209
GATGACATTGTATCCTGTGATATG

>D8PAK:00157:00244
CTACCGATTGTGAGCCCGGTTACA

>D8PAK:00158:00238
TTGTAACCTACCATACAGTTTCAA

>D8PAK:00158:00248
ATTGTAGCCTGCGCTACAATTGAA

>D8PAK:00159:00207
AGAACAAATGTATCTCGTCATACA

>D8PAK:00159:00231
TCTAACTATGTAATCCACGTTACA

>D8PAK:00160:00231
ATGTAGTCCGCGATACAATGTCCG

>D8PAK:00161:00202
TAAGAATTTGTGGTCTACGTCACA

>D8PAK:00161:00234
ATCAGAATTGTGATCCTCATTACA

>D8PAK:00162:00207
CGCATTTGTAATTCAAAATACACA

>D8PAK:00162:00208
GCTCTGTCTGTGGCCCGTGATACA

>D8PAK:00162:00221
ACGCAGACTGTACTACACGTCACA

>D8PAK:00163:00218
ATTGGTCATCCGTATTCCTGCTAC

>D8PAK:00164:00204
TCTTTTTTTGTGTCCCCACATACA

>D8PAK:00164:00240
GCCAAATCTGTAACTTAGGTTACA

>D8PAK:00165:00213
CCATAGATAGTAGCCCCGCATACT

>D8PAK:00166:00218
ACCTGATTTGTATGCTAGATTACA

>D8PAK:00167:00222
TTTGGGTTTGTGGTGCGCCATACA

>D8PAK:00167:00225
GTTGAAACTGTAATCCAAAGTACA

>D8PAK:00167:00233
GGCTGAAATGTATGTTGGCGTACG

>D8PAK:00167:00237
GTAAGCTTGCATCCAGCAAGCTGT

>D8PAK:00167:00249
TACTCCATTGTGAGCCCCGATACA

>D8PAK:00168:00228
CCGAAAATGTGTGCTAAGTTACAA

>D8PAK:00168:00242
ATATGGATCGCATCCTGGCATACA

>D8PAK:00169:00212
ATGCCTATTGTAACCCCTGGCACA

>D8PAK:00169:00228
ACTCCCTTTGTATTACAGCATACC

>D8PAK:00169:00243
CAGTATATTGTATTCCGCATTACT

>D8PAK:00170:00218
GACAACTTTGTAACCCTGGATACT

>D8PAK:00170:00220
GAAATCTTTGTAGCACCCGTCACA

>D8PAK:00170:00235
GCGATGAATGTATGCCAGCATACT

>D8PAK:00170:00242
CCGCAATTTGTAATTTAAAGCACA

>D8PAK:00171:00207
AGAAAATAAGTATTGTGGACTACA

>D8PAK:00171:00212
TCATATATTGTGTGCGGCGTTACA

>D8PAK:00171:00222
TACAAATTGTAACCCTGCTCACAC

>D8PAK:00172:00205
TTGTACGCTGCATTACAAGATTAT

>D8PAK:00172:00210
CGCTGTACCTCATCCGTTACCTAT

>D8PAK:00172:00214
ATTATCATTGTATTTTAGATTACA

>D8PAK:00172:00216
TTGTAGGCTATGCCACACTCTGCT

>D8PAK:00172:00220
TTGTATTATGGCATACAGAGACGC

>D8PAK:00172:00234
CCAGCGAATCGTAGCCTGGAGTAC

>D8PAK:00173:00236
TGATTCACTGTGACCCGTAATACA

>D8PAK:00174:00248
TTTACTGTAACCTAGACCACATTG

>D8PAK:00177:00224
ACCCTAAATGTAGCCCTCCTTACA

>D8PAK:00178:00229
CTAAACTGTAATCTACGCTACACT

>D8PAK:00178:00244
GTCAACTATGTATCCTAAATCACA

>D8PAK:00180:00223
GGCCACAGCGCATCCGGACTCAAG

>D8PAK:00181:00236
CGCTGAACTGTATTGTGGAGCACC

>D8PAK:00181:00244
TTACCTATTGTGACCCATGATACA

>D8PAK:00182:00230
GAGTTCATTGTATGCTAGAACACT

>D8PAK:00183:00207
AGAATTGTGTTGCACGTCACAGTT

>D8PAK:00183:00225
CCCCTGATTGTGGTTTAACATACA

>D8PAK:00183:00227
CCCCCCGACTGTAGCCCATCATAC

>D8PAK:00183:00230
AAACAATTTGTGTCCTGCATTACA

>D8PAK:00183:00240
GAACAATTGTGTCCGGAGGCACAC

>D8PAK:00184:00220
AATAATATTGTGATCTAGGCTACA

>D8PAK:00184:00221
TTGTATGCCCAGTTACATTCTCTA

>D8PAK:00184:00227
ATTTAAATTGTATCTACCGATACA

>D8PAK:00184:00242
TTCCAGATTGTGTCACGAAATACA

>D8PAK:00185:00206
ACATTTCTGTAACCTACATTACAA

>D8PAK:00185:00223
CTCCAATTTGTAGCCTCTAATACA

>D8PAK:00185:00224
AACGCCATTGTAACCCTCATTACA

>D8PAK:00186:00210
GAAAATTCGGTAACCTAAATTACA

>D8PAK:00186:00227
TTGTAGCCCGGAATACAATTATAT

>D8PAK:00187:00200
GAAACGATTGTAATCCAAACTACA

>D8PAK:00188:00213
CGGACCATTGTGACCTGTACCACA

>D8PAK:00188:00214
TCAAAACTGTACTGCAGCTTACAT

>D8PAK:00188:00219
CATCTTAATTGTGTCACAACATAC

>D8PAK:00189:00224
AATGTAAGTGTTGATCGAAATACA

>D8PAK:00190:00241
AGTATAATGTATCTATGTACCACA

>D8PAK:00191:00215
CGACTAATTGTATGCTGCACCCCT

>D8PAK:00191:00224
TTGTAGGCCTGCATACACTTCATA

>D8PAK:00192:00209
AACAATCATCCTGCTGGAGTACTC

>D8PAK:00193:00246
GAGCCCAGTTCATCCATGTATCGC

>D8PAK:00193:00248
TTGTATTCTGCGTTACAATGTCTT

>D8PAK:00194:00206
TTTTCGATCTGTATGCTGGAGCAC

>D8PAK:00194:00210
AATTTGTTTGTGAGCAGGACTACA

>D8PAK:00194:00225
CAAACAATTGTAACCCATGCTACA

>D8PAK:00194:00246
TTGGACTCCGTATCCTGTGCTACA

>D8PAK:00195:00205
TTCTACATTGCATCCTCTGCTACA

>D8PAK:00195:00214
TTGTATTGTGGCATCCAATTTGGG

>D8PAK:00197:00204
TTGTATGATGACATACAATTTTTA

>D8PAK:00197:00207
ATGTAGTGTAGACTACAGTTTATG

>D8PAK:00197:00237
ACCTTAATTGTAGTCTGTACCACA

>D8PAK:00197:00241
TGCCTAATCGTAATGCACGCTACA

>D8PAK:00198:00206
TACTTGATTGTAGCGTACCACACA

>D8PAK:00199:00247
ACCTAACTGTATTGTAAGATACAT

>D8PAK:00150:00285
CTGTATTCTATACTACAATTGTAC

>D8PAK:00151:00277
CTTTGGACTGTAGGCTTGGATACA

>D8PAK:00151:00294
TCGCCATTTGTGACCCCCATCACA

>D8PAK:00151:00298
TATGAAATTGTATGCTAAACGACA

>D8PAK:00152:00252
TTCTTCGGATCATCCTGGACATAT

>D8PAK:00152:00278
AAATTCAATGTATCGCATGTCACA

>D8PAK:00152:00283
ACGTAAAATGTGGCCCAAGACACG

>D8PAK:00152:00291
ATATAGAGTGTGTTCCAGCGTACA

>D8PAK:00152:00295
ATCACATTTGTGTCCTGTATCACA

>D8PAK:00152:00298
GTCAACTTTGTAACCAGAGCTACA

>D8PAK:00153:00270
ACTGCATTAGTAGGATAGATCACA

>D8PAK:00153:00275
CCGATTTCTGTAAGCCTGACTACA

>D8PAK:00154:00271
ATCTCAAATGTGTTCTTCGTTACA

>D8PAK:00154:00277
TTGTACCCTCTAATACAATTGCGC

>D8PAK:00154:00296
AATTGAATTGTGCCTGGGCATACG

>D8PAK:00154:00299
AGCGCTTTGTAGCCCAGGTTACAA

>D8PAK:00155:00252
CGATTGTGATCTGCACTACTATTC

>D8PAK:00156:00271
TCCGTTTGTAATCTATGTCACACT

>D8PAK:00156:00297
TATTCTTTGTGGTCTATAATACAA

>D8PAK:00157:00259
AACTAGTTTGTGTCCTACCATACA

>D8PAK:00158:00253
CTCAGTCTGTAGGCTGTGACACAC

>D8PAK:00159:00254
TTGTATGCTAAGATACTTTTGTAA

>D8PAK:00159:00262
TTGTACGCTGGGCCACATAGTTGC

>D8PAK:00159:00291
GCAGGATTGTATGCCAGCATGCAA

>D8PAK:00160:00266
AATTCGAGTGTGGGCTACGACACT

>D8PAK:00160:00273
TTGTATTCCACGCCACTAATTTTC

>D8PAK:00160:00276
GATGACACGTCATCCGTTGACTGT

>D8PAK:00160:00299
TTGTAGTAGAGGTCACATTTTTAA

>D8PAK:00161:00260
TTACGTATTGTGCCCTGTGTTACA

>D8PAK:00161:00278
TATTATTCGTATCCTGGCATACAA

>D8PAK:00161:00283
GGTGAGTTTGTGGCCTAGAGCACA

>D8PAK:00161:00287
ACTCCGTTTGTACTCTACGACACT

>D8PAK:00161:00292
ATGTATCCTAGAATACACTTTAAA

>D8PAK:00162:00255
TCCCAATTTGTACGTTGGCTTACA

>D8PAK:00162:00257
ATTCATCATCCAATCACTTCGAAG

>D8PAK:00162:00274
GATTTGACTGTGTTCTGGAATACT

>D8PAK:00162:00295
CTTTAGCCCGCATCCGGGCAGCCT

>D8PAK:00162:00299
CTCGCAATTGTGGCGCAGCCGACA

>D8PAK:00163:00275
TCTAGAAAGTATGCCAGAGTACAA

>D8PAK:00164:00266
TCCGGAATTGTAACCCGACTTACA

>D8PAK:00164:00271
TTTCAATTGTGTCGTAAGCTACAT

>D8PAK:00164:00273
AGTATGATTGTAATCCACGGCACA

>D8PAK:00164:00292
GAATTTGTGACCCCGGACACTATA

>D8PAK:00164:00294
CTTTGTAAGCTAAGCCACAATTCC

>D8PAK:00165:00250
TTTTGGTTTGTGTCCGGGACTACA

>D8PAK:00165:00270
ACCTCAATTGTAGTTCATCATACT

>D8PAK:00165:00273
CTCCAATTGTATCTTACAATACTT

>D8PAK:00165:00291
CATGGAACTGTCGTCTGGAACACA

>D8PAK:00166:00267
TAAAAATTGTGTCCCACCATACAA

>D8PAK:00167:00253
TACCAAAAAGTAATGGGGAATACA

>D8PAK:00169:00253
CTGTATCCTGACCTACAATTTGCA

>D8PAK:00169:00273
CACATTGTATTCCACGCTACAATT

>D8PAK:00170:00271
AACAGCTTTGTAGTCTAAATTACT

>D8PAK:00171:00279
AAGAACTGTAATGCGAGATACAAA

>D8PAK:00171:00281
GCCGAAAACGTATCTCAACCTACA

>D8PAK:00171:00299
AAATGGAATGTATCGTTGGCTACA

>D8PAK:00172:00290
TTGTATCTTGCGCTACGATCGCAC

>D8PAK:00172:00293
AAATTTTGTGTAGTCCCCGTCACA

>D8PAK:00173:00262
ATACAATCTGTATTCTGGCACACA

>D8PAK:00173:00264
TTCAAGAATGTAGCACCTGTCACA

>D8PAK:00173:00265
ATCCAATGTGTAAGCCTTAATACA

>D8PAK:00173:00267
CTCCGAATTGTAGCCAAGAGTACT

>D8PAK:00174:00262
CAGAGCTATGTATTCTGCGATACA

>D8PAK:00174:00291
ACCGAAAGTCCATCCTAGTCTGAA

>D8PAK:00175:00264
CGAGAATGTATTCTGCGATACAAA

>D8PAK:00175:00287
AAGCGGTTTGTGGTGCGAGGCACA

>D8PAK:00176:00262
ACACATTCTGTAGTGCCCACTACA

>D8PAK:00176:00272
CTAGATTGTGTATGCTAAACTACA

>D8PAK:00176:00274
GTTCCATTTGTGGCTAGGCATACA

>D8PAK:00178:00272
CACGTTAAGTCATCCGTAGCATAG

>D8PAK:00178:00273
ACCACGAATGTAAGTCAGATTACA

>D8PAK:00178:00276
CTGTAATGCACGTTACAATTCTCG

>D8PAK:00180:00265
TTGTATCCTAGATTACTATCGGGT

>D8PAK:00181:00271
CTTACAATTGTGTTGCGCAATACT

>D8PAK:00181:00296
GTGAGGAGTGTGACCTGCAACACA

>D8PAK:00181:00299
ACTCAGAAGGTAACCTGAGTTACA

>D8PAK:00182:00250
AACAACTTTGTAATCTGGGTCACC

>D8PAK:00182:00263
CATAATGTATCCTGAGATACAATG

>D8PAK:00183:00283
TATCTATTTGTATTATGCAACACA

>D8PAK:00183:00287
GACCTAAATGTATCCTACGCTACT

>D8PAK:00183:00298
TTGTATCCCAGGCCACAAGTGCCT

>D8PAK:00184:00251
ATTCAGATTGTAATCTGCAACCAT

>D8PAK:00185:00256
TTTGGAATTGTGGCGTGGCATTCA

>D8PAK:00185:00274
CTTAAAAATGTATCCTAGGGCACG

>D8PAK:00185:00290
CCTTTAGATTGTAACCTAGACTCC

>D8PAK:00185:00296
AACATACTTGTAATCAGGGCTACA

>D8PAK:00186:00255
GGCATAACTGTAGCTTGGCCTACT

>D8PAK:00186:00286
CGAGCACTTGTATCGTAGACCACA

>D8PAK:00187:00263
ATACGATCTGTATGACACGATACA

>D8PAK:00187:00272
TTAGATACTGTATTTCACGATACA

>D8PAK:00187:00293
TGTTCTATTGTATCCGGGCCTACT

>D8PAK:00188:00262
CAATTTGTAGCGCACCACACAATC

>D8PAK:00188:00275
AATTCAAATGTATCTTGCATTACA

>D8PAK:00189:00262
CCTTTGTACTGTGGAGTACATTTG

>D8PAK:00189:00264
AAAAAAATTGAATTACGGAGTACA

>D8PAK:00189:00292
TCGTACTCCAGGTCACAATTCGGA

>D8PAK:00189:00297
TTGTAGCCGGCCTTACATTTAGTA

>D8PAK:00190:00285
ATCCGAATAGTATGCAGCACCACA

>D8PAK:00191:00268
AAAAGATTGTACTCCTAACTACCA

>D8PAK:00191:00274
TTCGTGATTGTATCCTTGAACACT

>D8PAK:00191:00276
ATGTATCCTAAGTCACAATTGCAT

>D8PAK:00191:00290
AATCCAATTGTAGGATAGGAGACA

>D8PAK:00191:00291
GAATCAATTGTACGTTAGATTACA

>D8PAK:00192:00259
CCGTGTATGCCAGGTTACAATTGA

>D8PAK:00193:00254
ACGGTCATTGTATGCTAGAATACC

>D8PAK:00194:00280
TTATAAAATGTGTCCGTTAATACA

>D8PAK:00194:00288
CGTTCAATTGTGTGCCTGGTCACA

>D8PAK:00196:00269
GCGAACACTGTAATCCAGGATGCT

>D8PAK:00196:00281
GAACCAATTGTATTCTAAGACTCA

>D8PAK:00196:00287
TTTTGGACTGTAGTGGAAGTTACA

>D8PAK:00196:00297
AATGGATTGTATCCTAGACTACAC

>D8PAK:00197:00299
AATGGATTGTAGCCTCAAACACAA

>D8PAK:00198:00282
TTTGCAATGTTATTCCAGGCCACA

>D8PAK:00199:00250
CTCGTAATTGTGCCCCAGCGTACT

>D8PAK:00199:00252
GATTAGATTGTATTCCCCGTTATA

>D8PAK:00199:00258
AGTTATTTTGTATTGCTGCATACA

>D8PAK:00199:00259
AATACAGTCGTATGCCACGCTACA

>D8PAK:00199:00263
ATACTCACTGTACGCTAGCTCACA

>D8PAK:00150:00305
CCATTTCTTGTATCCCAAGTCACA

>D8PAK:00150:00312
CTATTAAATGTAGTAGGGCTCACA

>D8PAK:00150:00316
TTTTAGATTGTAGCCCATACTTAT

>D8PAK:00150:00337
TACATAATTGTATGCGGGGATACA

>D8PAK:00150:00340
CCAACGACTGTAACTTGCGCTACA

>D8PAK:00151:00312
CACTTAATTGTATGCTACACAACA

>D8PAK:00151:00315
CGAATATTTGTATTCCTACCTACA

>D8PAK:00151:00323
TTTGCGACTGTGTTCTAGGTCTCA

>D8PAK:00152:00300
TATGCATGTGTATGCTCGGCTACA

>D8PAK:00152:00307
CTGTATGGCACGATACAATGTGGT

>D8PAK:00152:00318
ATCGATTCAGTAGTACAGGTCACA

>D8PAK:00152:00340
CATTACATTGTACTCCCCGATACA

>D8PAK:00153:00300
AATTAAATGGTATGGCAGGGCACA

>D8PAK:00153:00303
TTGTATCACAACCCACATTCTCGA

>D8PAK:00153:00337
ATTACTATTGTAGCTCAGCGCACA

>D8PAK:00154:00318
AAACGAATTGTATTGTCCACCACA

>D8PAK:00154:00321
GCCAAGATTGTGACCCTTGTTACA

>D8PAK:00154:00323
TTGTAACGTATGTTACATTTCGGT

>D8PAK:00154:00349
ACGTTAAATGTAGTGTAGGCCACT

>D8PAK:00155:00319
CTACCGATCGTGACCCAGTATACA

>D8PAK:00156:00332
CTTATCATTGCATCCGAATTGCTC

>D8PAK:00156:00337
GCATTGCCGGCATCCAGCCGGGGT

>D8PAK:00156:00341
CAGAACATTGTAGCATAAACTACA

>D8PAK:00157:00307
AAAAATGTAACCTAGGTTACAGTG

>D8PAK:00158:00310
ATCTAAATTGTGCTTTGTGACACA

>D8PAK:00158:00315
AAATTTATTGTAGTCTAGACTACA

>D8PAK:00158:00316
GAAATAAATGTAACCCAGATCACT

>D8PAK:00158:00348
TTGTATCATAGAACACATATCACT

>D8PAK:00159:00321
AATTAAATTGTACGATACGGTACA

>D8PAK:00159:00333
TCCATAATTGTGGCCTCACCTACA

>D8PAK:00161:00310
TCAATTTTTGTACTACAGACTACA

>D8PAK:00161:00334
TTGTACGCAGCGTTACAATTATGT

>D8PAK:00162:00348
CATTCGATTGTATTAGGGGTCACC

>D8PAK:00162:00349
GTCAGAATTGTAATCTAAGCCACT

>D8PAK:00164:00324
TAATAAATTGTATTTTAGAATACA

>D8PAK:00164:00335
ACTGTAGTCTGGGATACACGTTTC

>D8PAK:00165:00300
GTAGAAAATGTATGCTACACTACA

>D8PAK:00165:00342
CACATTGTGGCCCCTGATACAATC

>D8PAK:00165:00349
CTTGATTTTGTAGTGCGTAATACA

>D8PAK:00166:00311
AAGTAAATGTAACCCAAGATACTT

>D8PAK:00168:00313
ATTAGAATTGTCACGTACATTACA

>D8PAK:00168:00317
ATCCTTATTGTAGTATGCGCTACA

>D8PAK:00168:00318
TTGTAGTCCAGGCTACGAGTCATA

>D8PAK:00168:00338
ATTCAAAACGTATGCTGTCTTACA

>D8PAK:00168:00347
TTGGAATTGTAACCTACGCCACAG

>D8PAK:00169:00307
CGTCAAACTGTATCGCACGTTACA

>D8PAK:00169:00323
ATTATCACTGTAATTCAGCATACA

>D8PAK:00170:00300
TTGTATGCTGGCATACTGTGTATT

>D8PAK:00170:00302
TTCTGAATTGTATCCCCCATCACT

>D8PAK:00170:00312
CATACTGTATGCCAGACCACATAA

>D8PAK:00170:00343
GTCTAGATTGTGTGCTGGCTCACC

>D8PAK:00171:00306
TTTTGAATTGTAACAGGACTCACA

>D8PAK:00172:00331
TTGTAGTATGGAATACACTTGTTT

>D8PAK:00173:00300
AGTCATTCTGTGCTCTAGGTCACA

>D8PAK:00173:00322
CTGTGTTCTGGACCACACTCTTAT

>D8PAK:00173:00324
CTTTCCTTTGTACGCGTCAATACA

>D8PAK:00174:00304
GCCTTAAATGTATTACTCCTTACA

>D8PAK:00175:00339
ACTCGAAAAGTATCCCCTACTACA

>D8PAK:00176:00313
TTCAGTTGTGTAGCCCCGGACACA

>D8PAK:00176:00344
TCCAACAATGTATTCCGAGCCACA

>D8PAK:00177:00305
CACCAAATTGTAATTACCACTACA

>D8PAK:00177:00309
TAGTAAATGTGGTGTGCACTACAA

>D8PAK:00177:00320
TATATAATTATAGCGCACACTACA

>D8PAK:00177:00335
ATCAAGACTGTGGTTCAGGTTACT

>D8PAK:00178:00309
TGGCTCATTGTGTTCTGGAACACA

>D8PAK:00179:00316
CGAAACTTAGTAAGCCAGGGCACA

>D8PAK:00179:00322
TAAACTTTGTAGGCTAGCATACAT

>D8PAK:00179:00336
GGTGCGTTTGTAGGTGGGGCTACA

>D8PAK:00179:00349
TAACTAATTGTATGCAAGAATACA

>D8PAK:00180:00311
AACTGTCATCCCGCTTACATATTT

>D8PAK:00180:00321
TCCCAGTTTGTATTATAGCGTACA

>D8PAK:00181:00306
TAGGAAAATGTGATCAAGGATACA

>D8PAK:00181:00330
TATAACATCGTGCTCTAGCCCACA

>D8PAK:00182:00302
AATCACAATGTAACCTATCCTACT

>D8PAK:00182:00305
TATTAATTGTATTCTACAACACAA

>D8PAK:00182:00314
TTTTGGACTGTACGCAGGGCTACA

>D8PAK:00182:00315
TTCTCGACTGTATTACCGAATACA

>D8PAK:00182:00318
CGGTGATTTGTGCGCCAAACTACA

>D8PAK:00182:00331
CGGACACCTGTATTCTGGAACACA

>D8PAK:00183:00317
CACCCTTGTATTATACGAGCTACA

>D8PAK:00183:00320
ACCTTGATTGTAGGCTGTGCCACA

>D8PAK:00183:00324
AATTCTGTATTCTGAGTTACAATG

>D8PAK:00185:00305
TGGATGATTGTAATCTAGGTTACA

>D8PAK:00186:00315
TACAGTTTGTATGCCAGCTTACAA

>D8PAK:00186:00318
ACTTTTTTTGTATAGTGGACTACA

>D8PAK:00187:00300
CATGGAATAGTATTCTGCGTTACT

>D8PAK:00187:00314
GGCGAGTTTGTAGTCTAGATTATT

>D8PAK:00188:00300
ACTTATATTGTATGCTAGTATACA

>D8PAK:00188:00301
ATCCGGTTTGTAACCCCCAATACA

>D8PAK:00188:00308
TTGTAATCAGGGATACAATACCTT

>D8PAK:00188:00311
CGAACATTTGTAACGTGCAACACA

>D8PAK:00188:00317
AGACAGATTGTGCTTGGCATTACA

>D8PAK:00188:00318
GCGCAGATTGTATCGCACGCCACA

>D8PAK:00188:00323
TAAACGAATGTATCCCATGGCACA

>D8PAK:00188:00340
TCCTAACTGTAACCTAGACCACAT

>D8PAK:00189:00318
ACTCTATTTGTATTCCCAGGTACA

>D8PAK:00189:00331
GAGCAGTTTGTAATCTGGAACACG

>D8PAK:00189:00344
TTGTGTTCTAGAATACACTTGCGT

>D8PAK:00190:00323
GCCTTGATTGTGTGTCTGCATACA

>D8PAK:00191:00337
CCTGACCCTGCATCCGTCTTACCT

>D8PAK:00192:00310
AGGGAGATTGTAGTTACGGTCACA

>D8PAK:00192:00334
CCGCGGAAAGTGTCCTCGAATACA

>D8PAK:00193:00337
TACGGCACTGTGACCTGGCCTACA

>D8PAK:00193:00346
AAGAGAACTGTAACTTAAGTCACG

>D8PAK:00194:00344
ACCGCGATTGTTGCCTAGCCTACA

>D8PAK:00194:00345
CTGCAGATTGTATTATAACCGACA

>D8PAK:00195:00316
TTGTATCCCAAAATACACTTTGTC

>D8PAK:00195:00318
ACGCCAATTGTGCGATAGGATACA

>D8PAK:00196:00320
CCAACAAACGTATTACAAGCTACA

>D8PAK:00196:00344
TAAAATGTGACTTGAATCACAATT

>D8PAK:00199:00317
ATTGAAGATTGTATTATTAATTAC

>D8PAK:00199:00320
AACTGAAACTGTATGCTGGAGCAC

>D8PAK:00199:00331
TTGTATTTCCCGCTACAATTATGG

>D8PAK:00150:00361
CTGTCGAACAGTAAGCTAGCATAC

>D8PAK:00150:00362
AAGCAACGACATCCTCTTACTATG

>D8PAK:00150:00383
TCGCGATTGTAACCTATACCACAC

>D8PAK:00151:00365
TTGTATCCTATCCCACAGTTCAGG

>D8PAK:00151:00374
CACACAATTGTATTCCCCAATACT

>D8PAK:00151:00378
TAACGAATTGTAATACTGACTACT

>D8PAK:00151:00381
ACGGACTATGTATGTTGAATCACA

>D8PAK:00151:00389
ACATAATTGTAACACACACTACAG

>D8PAK:00152:00371
GCCGAGTTTGTGCCCTGAACTACT

>D8PAK:00152:00383
AAAAGGACTGTAGTCTAAGTTACA

>D8PAK:00154:00365
ATCGTGACTGTGACTCAGGTTACA

>D8PAK:00154:00368
GAAGAGATAGTGCTGTGGCCCACA

>D8PAK:00154:00377
TTACAAATGTAGCCTGTCCTACAG

>D8PAK:00154:00380
ACTAGATTGTACCATGGCATACAT

>D8PAK:00155:00351
GAGAAAACTGTGTTGTGTGCTACA

>D8PAK:00155:00398
AATCAAGGCCCATCCACATTCACG

>D8PAK:00156:00353
GTTCACAATGTATTACCGCCTACA

>D8PAK:00156:00376
CTTTGCTTTGTGATCCACACCACT

>D8PAK:00156:00384
TCCGAAGTAGCATCCAGGTATTTA

>D8PAK:00156:00387
ACGGCAATTGTATCGTGGCCCACG

>D8PAK:00157:00392
ATGAAATTTGTAGCTCAACCCACT

>D8PAK:00158:00353
AGCTTCAACGTATTACAGGCTACA

>D8PAK:00159:00394
CTAAAGGCGCATCCCACAGGGTCC

>D8PAK:00160:00350
TACCTGTTTGTGACCTGGACTACG

>D8PAK:00160:00372
TGTAGCGCAACATCCTTAGTATCA

>D8PAK:00160:00373
CCCGTCAAGCATCCGAATTCAGTC

>D8PAK:00160:00384
CAAAACTTGTATGACCGTGACACT

>D8PAK:00161:00371
TCACCTTTTGTAAGATGGCTTACA

>D8PAK:00162:00386
TCCTTTACTGTAAGCTGGATCACA

>D8PAK:00162:00388
TCCAAATGTAGTGTGTAATACAGG

>D8PAK:00162:00396
CTAACTGTACGCCAGGATACACTT

>D8PAK:00163:00353
GATCACCAATCATCCCTGGACGAG

>D8PAK:00163:00370
AATTGTGTAGTGTGGATTACAATA

>D8PAK:00165:00362
AAACACATTGTAGTGTACGATACC

>D8PAK:00165:00382
TTGTGGCGCGCGACACAGTTTTTG

>D8PAK:00165:00397
CTCTTTGTGTAGCCTGGGCTACAA

>D8PAK:00165:00399
GCCCTGAAGGTATGCTAGAATACA

>D8PAK:00166:00352
TTGTGATCTGCATTACAATGCCTA

>D8PAK:00166:00364
GTCGATTGTGAGCTTGAATACATT

>D8PAK:00166:00369
TAAATTATCGTAATCTAGGCCACA

>D8PAK:00166:00379
TCCTAGTTTGTGGGCCAGGTCACA

>D8PAK:00166:00394
TTTCAAATCTTATGCCAGCCTACA

>D8PAK:00167:00361
TTAACCTTTGTAGTGTAAACTACA

>D8PAK:00167:00363
CTCAACAAAGTATTCCATAATACA

>D8PAK:00168:00354
ATAAACAATGTAAGCCATACTACT

>D8PAK:00168:00357
TAACAACTCTCATCCCTCCGGGCG

>D8PAK:00168:00378
CGTAACATTGTATCAGGGATTACA

>D8PAK:00168:00395
ACAGACTGTGGCGCATGATACGTT

>D8PAK:00169:00361
TTGTATCTTCCGACACAATTTTCG

>D8PAK:00169:00366
CATAAGATTGTGTTGCTCGATACA

>D8PAK:00169:00384
TACTAGATTGTGTCGTATCTTACA

>D8PAK:00170:00362
ATGTAGGCTGAGATACAGTGCGTT

>D8PAK:00171:00354
GTAAGAAATGTATTCCAAACTACA

>D8PAK:00171:00358
AACAATGTGCCCTGGCATACACAT

>D8PAK:00171:00368
ATTTAGATTGTAACGCCGGGAACA

>D8PAK:00172:00368
TTTCTTGTATCCGGGGATACAATT

>D8PAK:00174:00364
ATGTATTACAGGCCACACTTAGAT

>D8PAK:00174:00366
AGGTTGACTGTACTCCACGTCACA

>D8PAK:00174:00391
TTGTATGACAGATCACAGTCGACG

>D8PAK:00174:00393
AGCTTAAATGTACTCCCTCTTACA

>D8PAK:00175:00352
TTCCTTTCTGTAATCTGGAATACT

>D8PAK:00175:00370
GAAAAGATTGTAGCGCATAATACA

>D8PAK:00176:00350
CAAAGGATTGTGATGTGCAACACA

>D8PAK:00176:00371
ATGTATGCTAGACTACACTTGTCT

>D8PAK:00176:00386
CACTGGTTTGTGACCTGTCCCACA

>D8PAK:00176:00398
CCCCTCACTCCATCCAGCAAACTA

>D8PAK:00177:00399
ATGACGACTGTGTACCAAGATACA

>D8PAK:00178:00358
GGGTCGTTTGTGTTCTGAGATACA

>D8PAK:00178:00390
CCTCGAAATGTGACCACAGATACA

>D8PAK:00179:00354
TTGTAGTCTACCAATACAATCGTC

>D8PAK:00179:00378
GTGTGACCCAGCACACATTTGCAG

>D8PAK:00179:00384
CCGCTTTGTGACCTACGCTACATT

>D8PAK:00179:00389
CCATTTGTGCTCTAGCCTACACTT

>D8PAK:00180:00366
CTTCTCCCACCATCCTACTGCTAC

>D8PAK:00180:00375
AATCGAAAAGTAGTTCACAGTACA

>D8PAK:00180:00380
ACGAACAATGTATCATACAATACA

>D8PAK:00182:00381
AGGAAAAACGTATCTTGTAGTACA

>D8PAK:00183:00353
AATAGAAAAGTATCCTAGCTTACT

>D8PAK:00183:00356
CGCCACTATGTATTCCCCATTACA

>D8PAK:00183:00372
GGCTAAATTGTATCATAAGTCACC

>D8PAK:00184:00361
GTATAAAACGTATCCTGCGCTACA

>D8PAK:00184:00395
AAACAAACTGTAACGGGGGCCACT

>D8PAK:00185:00375
GAGTTTGTATTCCTGATCACATTT

>D8PAK:00185:00381
GTCTTTGTATGCGAGGCTACAGTC

>D8PAK:00186:00383
ATATAATATGTGACGTGAGACACA

>D8PAK:00188:00371
GTTTAAACTGTAGTCTGTCTCACA

>D8PAK:00188:00373
TGTGGATTTGTACGCTCAACTACA

>D8PAK:00188:00381
TTACAATTTCATCCTGTTTTCCTC

>D8PAK:00188:00388
TATACAATTGTAGTCTCAACTACA

>D8PAK:00188:00390
TTGTAATACAGCATACATGTTAAC

>D8PAK:00188:00394
GTTGCGTTTGTATGATAGACTACG

>D8PAK:00188:00396
GGTGCGAGTGTGGTCTTGCATACA

>D8PAK:00189:00354
ACTGCGATTGTGATCCACGCCACT

>D8PAK:00189:00366
CCAAATGTACCGTAGCCTACAAAC

>D8PAK:00190:00353
GAATGAATTGTATGCTGGACACAA

>D8PAK:00190:00389
CCCAGACTGTGACCTATAATACAC

>D8PAK:00191:00381
CATAAAATAGTAGTCTAAGATACA

>D8PAK:00191:00395
ACATGATAGTCATCCTTACGCTAC

>D8PAK:00192:00376
TAATATTTGTGTCCCATACTACAT

>D8PAK:00192:00392
AGTCTATATGTAGCCCTTCCTACA

>D8PAK:00192:00393
CCTACGATATCATCCGTGTGAAGG

>D8PAK:00192:00396
CTCAATTTGTAATCTGGGATACAA

>D8PAK:00192:00399
TTCTCGACTGTATTACCGAATACA

>D8PAK:00193:00352
GCAAGAATATCATCCAGGGTCGTA

>D8PAK:00193:00356
TGGTCAAGTGTAATTTAGGCTACA

>D8PAK:00193:00357
AAGTTTAGTGTAGCGCAGCTTACA

>D8PAK:00193:00376
TCGGAAACTGTACTCGACAATACA

>D8PAK:00194:00365
TTGGAATAGTTAGTGCCATATACT

>D8PAK:00194:00399
ATCCAAATTGTAACTCAGGTTACT

>D8PAK:00195:00378
ATTCAGATTGTACGCCGGAGTACA

>D8PAK:00196:00351
TTGTGGCATATCCTACAATCTATC

>D8PAK:00196:00391
CTTCCAATTGTATTCTACCGCACA

>D8PAK:00197:00353
TTGTATCCTAGAACACATCTCCGG

>D8PAK:00197:00354
TTGTATCCTGGCACACTATTAGAG

>D8PAK:00198:00372
TTTGGAATTGTAGATCACGCTACA

>D8PAK:00198:00387
CACCGACTGTGGCGCCGGCTACAA

>D8PAK:00199:00354
AAATTGGTAACCTAGACCACACTT

>D8PAK:00199:00371
CTGTAGCTCAGGACACATTGTGAC

>D8PAK:00150:00428
TTGTGACCCCGAATACTTTTGCCC

>D8PAK:00150:00437
ATCGAATCGTAGCCCGCAATACAA

>D8PAK:00151:00428
ATCCAGCATCCGCAAAGCTTTCAC

>D8PAK:00151:00432
AAAAAAATTGCATCCTAGGATATA

>D8PAK:00152:00407
CGCCACATTGTATTTGCTATTACA

>D8PAK:00152:00410
TGGAACATTGTAGCGCCCAGTACA

>D8PAK:00152:00430
ACCATAATTGTCACATAGAATACA

>D8PAK:00152:00438
GATCTAAATGTAATGTGGCATACT

>D8PAK:00152:00442
AGATTGAACGTGCCCCAGCTTACA

>D8PAK:00153:00438
CTCTGGATTGTAATCTAAGCTACA

>D8PAK:00154:00439
AACATGATTGTGTCCCCTCTTACA

>D8PAK:00154:00440
ACTCAAACTGTAGCATGCACTACT

>D8PAK:00154:00445
TTGTAGTCTAGATTACAGTATGTC

>D8PAK:00155:00426
ACATTACCCACATCCGTTTTATTG

>D8PAK:00155:00437
ACTTACATTGTGTCACGGCTTACT

>D8PAK:00155:00445
TCCAATTGTGAACTGTACTACTAA

>D8PAK:00155:00449
GATGCCAATGTATGCCAGCTCACA

>D8PAK:00156:00412
ACTGTTATTGTATCCCCGCATACA

>D8PAK:00156:00420
CTCATAATTGTGACCCAGCGTACC

>D8PAK:00157:00412
CCGAACCTTACATCCTTTCTGATT

>D8PAK:00157:00416
CTAGCCATTGTGTTCCAGGACACT

>D8PAK:00157:00429
GTGAAAATCGTATGGCGCGTTACA

>D8PAK:00157:00445
CGCTTATTTGTAAGACAGGATACA

>D8PAK:00158:00416
AAGAACTTTGTGATTTGCATTACA

>D8PAK:00159:00426
AATAATATTGTGATCTAGGCTACA

>D8PAK:00159:00440
TATCTATTTGTATTATGCAACACA

>D8PAK:00160:00400
GCCTTGATTGTAGTCTAAGTCACA

>D8PAK:00160:00426
TTAACTGTATCCTGTGCTACGTTT

>D8PAK:00160:00430
AATAGTGTATTCCACATCACAATT

>D8PAK:00161:00400
TTGTATTTTAGATTACAATATATG

>D8PAK:00161:00408
TTTTTGATCGTAGTGTACACTACA

>D8PAK:00162:00400
CCCCCATTTCTGCATCCGCTGCGT

>D8PAK:00162:00420
TTCCTTGTTCCATCCGGTTTACTA

>D8PAK:00162:00449
AAACATGTATCCGGGAATACAAAC

>D8PAK:00163:00409
GTGTAGCCCAGACTACAATTACCG

>D8PAK:00163:00410
TTCCCGAATGTATTCCGTGCTACC

>D8PAK:00163:00411
CTTCAAAAGTATTGTAGGCTACAG

>D8PAK:00163:00439
AAAAATTGTAGGCCTGACGACATT

>D8PAK:00164:00405
CGGATAATTGTAAGCCAAGATACA

>D8PAK:00164:00409
AATTATTTGTATTCTTGCATACAA

>D8PAK:00164:00441
GGCCACATTGTATTTGGGCATACT

>D8PAK:00165:00404
GTTATAATTGTAGTTCAGGCTACC

>D8PAK:00165:00407
CTCTTTATTGTAGTCCGGGATACG

>D8PAK:00165:00411
GCAATCAATGTAGTCTGTAATACA

>D8PAK:00166:00425
TGTCACTATGTAATTTAGAATACA

>D8PAK:00166:00431
ACATAATTGTATCCCGCGACACAC

>D8PAK:00168:00435
TTGGTAACTGTACTTCACAATACA

>D8PAK:00170:00435
AGGAAGATTGTATGATGAAACACT

>D8PAK:00171:00402
ATTGCTTCTGTATCCTAGCCCACG

>D8PAK:00171:00407
TTAGTAATTGTGGCGTAGAACCCA

>D8PAK:00171:00428
ACGGTACCGTCATCCCCATTTTCA

>D8PAK:00171:00446
TACGAATTGTACTTCATAATACAC

>D8PAK:00172:00419
TTCCGGATTGTGTCGAGTGTTACA

>D8PAK:00172:00429
GACGCTTTGTATGCCACGATACAC

>D8PAK:00173:00422
GTCAAAACGGTAATCCGGGCTACA

>D8PAK:00173:00435
AGAACATTGTGTCTTAACATACAA

>D8PAK:00174:00404
CCACAAACTGTGTGCTGGAATACT

>D8PAK:00174:00414
AACAAATTGTGGTTCAGCGCACAA

>D8PAK:00174:00441
AAAGATTTTGTGGCTTATATCACA

>D8PAK:00175:00413
ACCACAACTGTATCATGCAATACG

>D8PAK:00175:00442
CTGCAAACTGTGCTGCCGCGTACA

>D8PAK:00176:00400
TACGGATTGTAATCTGAACCACAT

>D8PAK:00176:00414
AGCAGAATTGTAGGCCATGTCACT

>D8PAK:00176:00434
GCTAAAAAAGTAAGTCCGGCTACA

>D8PAK:00176:00437
ATGAAGATCGTATGCTGGACCACG

>D8PAK:00177:00443
TTGTAATGAGGAACACAATCTATC

>D8PAK:00179:00403
CAGATAATTGTATGCTTAAGCACA

>D8PAK:00179:00428
ATGACCTACCATCCTGGTCTAGCG

>D8PAK:00179:00436
AACTGTATCCTGAGACACAATAAA

>D8PAK:00180:00403
GAAATAATTGTATTCCTCCGTACA

>D8PAK:00180:00442
ACTCCGATTGTGACGAAGGCTACT

>D8PAK:00181:00445
CATTAGATTGTAGCGTGCAGCACA

>D8PAK:00182:00414
TTCTAAAATGTGCCGCATCCTACA

>D8PAK:00182:00436
AAAGAGATTGTATCACCTCATACA

>D8PAK:00183:00441
TTGTATGGTGTACTACAATCCTGA

>D8PAK:00184:00405
TTGTATCCAGGGTTACAATTTGCC

>D8PAK:00184:00410
CAATTTGTATCGCAGCTTACAGTT

>D8PAK:00184:00415
TGTATAATTGTAGCACATGCCACA

>D8PAK:00185:00402
TTGTATGACAGCATACTGTCTTTT

>D8PAK:00185:00410
AGTGCCATTGTATCTCATCATACA

>D8PAK:00185:00437
TCAGACTTTGTATTCCACCATACG

>D8PAK:00185:00439
ATTTGAACTGTAGCCCCGAATACA

>D8PAK:00186:00436
TTGTGCCCCAGGCTACATTTTTCA

>D8PAK:00187:00401
CTCTACACCGTGTCCTAGCATACA

>D8PAK:00187:00415
ATGTATCCTGCGCTACCGTTTCTG

>D8PAK:00187:00441
TTTTAAATTGTACGCTGAATTGCA

>D8PAK:00188:00419
CGTCCGATTGTATGATAGGCTACC

>D8PAK:00188:00423
TTGCCGATTGTAGTCTACGCTACC

>D8PAK:00188:00424
GGATTGTGCCTCAGCCTACAAACC

>D8PAK:00188:00442
ACGACGAATGTGTTCTGGAGCACA

>D8PAK:00188:00448
GTGACCATTGTATCCCATCTCACA

>D8PAK:00189:00438
GTTGAAACTGTAATCCAAAGTACA

>D8PAK:00189:00445
CTAATAGCCGCATCCCGATCACTA

>D8PAK:00190:00418
TTGAGAATTGTGTCCTGCACCACT

>D8PAK:00190:00443
TGGTCAATTGTATTCTACGCTACG

>D8PAK:00190:00448
TATAGATTTGTATCCGGGAATACA

>D8PAK:00191:00406
GCCGAGAATGTATCCTAGACCACA

>D8PAK:00191:00431
AAGAAATCTGTATGCTGCATTACC

>D8PAK:00191:00439
GACCCGACTGTGATGGGGCATACA

>D8PAK:00192:00404
GTACCAAGTGTATGCTAGAATACA

>D8PAK:00192:00444
AATTAGTTAGTATCCCTGAGTACA

>D8PAK:00193:00411
AAAATTCACGCATCCCTTAACCTG

>D8PAK:00193:00412
CTTCACATTGTGTTCTATAATACA

>D8PAK:00193:00414
TACTAGATCGTGACTCAGAGTACA

>D8PAK:00193:00437
ATTGGAAACGTGATACAAACTACA

>D8PAK:00194:00440
CATTGATTTGTATCGTCAAATACA

>D8PAK:00195:00424
TTTTCCTTTGTATGCCATGATACA

>D8PAK:00195:00429
TACTAAATTGTATCTCTGATTACA

>D8PAK:00195:00439
ACATGAATTGTAATCTCAAATACA

>D8PAK:00195:00441
TTTCAAAACGTGAGACCGGATACA

>D8PAK:00195:00447
CATACGATTGTAGTTTCAAGTACT

>D8PAK:00196:00409
TTTGGAAATGTGACGCACAACACA

>D8PAK:00197:00414
AATCATATTGTGGTTCCGGTCACA

>D8PAK:00198:00421
TCTTGATAGTAAGCTGGCATACAT

>D8PAK:00198:00434
TACTAGTTTGTAGCCCATACCACA

>D8PAK:00199:00422
AGAAGAATTGTAGCCTGGCGTACC

>D8PAK:00199:00438
GCAATAATTGTATTATAGATTACC

>D8PAK:00150:00465
GTAATGATTGTAACCTGGGGTACA

>D8PAK:00150:00486
TAATCAACTGTATCCCAGAACACA

>D8PAK:00151:00454
TTGAAGATTGTAACCTGGCCCGCA

>D8PAK:00151:00497
GTATTCTTTGTAACCTGTGACACA

>D8PAK:00153:00451
ACTTTGTTTGTGATCTGGCACACA

>D8PAK:00153:00474
TAAACAAGTGTATCCGAGCTTACA

>D8PAK:00153:00478
TTCCTAAAAGTAATACGTGCTACA

>D8PAK:00153:00484
TCCCCCTTTGTGTCCCAGGATACT

>D8PAK:00153:00487
ACATCGATCGTAGTTTAGAATACA

>D8PAK:00155:00472
GCCATTGTGGGCCATATTACACAA

>D8PAK:00155:00474
TTTTCAAATGTGTTCGTGCATACA

>D8PAK:00155:00478
TTCCAGATTGTATTCACACATACA

>D8PAK:00155:00488
CTGTGCACTGTATGCCTCAATACA

>D8PAK:00156:00460
ATATTAGTTGTAGCGTGGCTCACA

>D8PAK:00156:00469
TGTTAGAATGTGGCCCAGGATACA

>D8PAK:00156:00473
CAAGATCGTAGGCTAGCTTACATT

>D8PAK:00157:00461
TTGTAATTTAGAATACAGTTACTA

>D8PAK:00157:00497
CGTCAGTTTGTAGCCCTGCCCACA

>D8PAK:00158:00461
TACTAGATTGCGATGCCAGACACA

>D8PAK:00158:00488
TTTCCCTTTGTATCCTGGCCCACA

>D8PAK:00158:00492
ACTCACTTTGTATGCTTGACCACA

>D8PAK:00159:00469
AATTTATTTGTATCTCGGATTACT

>D8PAK:00159:00489
TTGTAGCGTGGCCTACAAAGCGAT

>D8PAK:00159:00493
CTGTGTACTGTAGGCGGGAATACA

>D8PAK:00160:00459
CGGTCGACGTCATCCTCGTTTTGC

>D8PAK:00160:00479
CACTAGATTGTATTTTGTGCTACG

>D8PAK:00161:00462
ATCGTAATTGTGAGCGCGGTCACA

>D8PAK:00161:00467
CTCTAAATTGTAATTCTGCCTACA

>D8PAK:00161:00481
ATCCCTTATGTAGCCGACACTACA

>D8PAK:00162:00466
TCTCGAATTGTAATCCTTGCTACA

>D8PAK:00162:00469
ATTAATATGTATTCCCGGTTACAC

>D8PAK:00162:00483
TCAAAGAACGTGTTCCGGGATACA

>D8PAK:00163:00472
TCTGTAAATGTATCTTGTCTTACA

>D8PAK:00163:00488
TGTATCCCAGGTCACATTCTTGGT

>D8PAK:00164:00482
CAAAAATCTGTATTCTCTGACACA

>D8PAK:00164:00496
AACTTAAATTGTAGTCTGTGATAT

>D8PAK:00165:00456
AATGTTATCCCAGCATACAATTCG

>D8PAK:00165:00493
TAGTGTCCTAGCCTACAGTTCCCT

>D8PAK:00166:00462
CCACAGACTGTAGCACAGAGCACT

>D8PAK:00166:00486
AAGTCAATGTAGTGTGTGCTACAC

>D8PAK:00166:00487
ATACAATAAGTAACCTGGAATACA

>D8PAK:00168:00474
ACGTGGATTGTAGGCTAACTCACA

>D8PAK:00170:00475
CCGTAAATTGTATCCTAGAATGCA

>D8PAK:00170:00478
TTGTAATCCAGACTACATTTTCTC

>D8PAK:00170:00483
GAATTTTTGTAGTCCAGCTCACAA

>D8PAK:00170:00484
TACTTCTTTGTAGCCTGTGATACT

>D8PAK:00170:00494
AACATGATTGAATCCTAGGTCACA

>D8PAK:00171:00474
CAACAAATTGTGACCTGACTTACT

>D8PAK:00171:00489
TGCCCATTCGTAAGCTGTAATACA

>D8PAK:00172:00464
AAAAATTTTGTATCCGACACTACA

>D8PAK:00172:00488
ATGTAGGCTAGCATACATTCATTG

>D8PAK:00173:00456
AGCTTAATTGTAAGCTAGCCCCCA

>D8PAK:00173:00457
ACCATAATTGTCACATAGAATACA

>D8PAK:00173:00459
CTTCGAATTGTAGCCTACACCACT

>D8PAK:00174:00450
AATCGAATTGTATGTTCTCTCACA

>D8PAK:00175:00483
GTCAGTCTTGTATGCTAGCACACA

>D8PAK:00176:00458
AATTTGAAAGTACTCCAGCCCACA

>D8PAK:00176:00470
CAATGTATTGTATCATGGGGTACA

>D8PAK:00176:00485
CCCGACTTGTATTACAGCCTACAG

>D8PAK:00177:00458
ATTTAAATGTAGGCCATACTACAG

>D8PAK:00177:00487
TCTCGCTTTGTGTCTCAGAATACA

>D8PAK:00178:00466
TGAAAATTTGTATGGCCGCCCACA

>D8PAK:00178:00469
GCCCGATTTGTCTGCTAGCCTACA

>D8PAK:00178:00475
CTCGAGATTGTATCCCACGCTAAG

>D8PAK:00178:00486
CATATTGTAGCGGGGGTTACACTT

>D8PAK:00178:00488
TTTAGAACTGTATGTTGCCGTACT

>D8PAK:00179:00463
CAAGGTTTTGTAGTCTGAAATACA

>D8PAK:00179:00465
CCAAAATTTGTGTGACAGCTCACA

>D8PAK:00179:00491
AAATAAATTGTATCCTGCTCCACA

>D8PAK:00180:00458
ACCGCGAATGTAGCGCTCAATACT

>D8PAK:00180:00473
AATCTTTTTGTATCGTTTGGCACA

>D8PAK:00180:00486
TTCGTTTGTGGCGTGAGCTACAGG

>D8PAK:00181:00482
TAATTAATTGTATTCCTGCATACA

>D8PAK:00181:00492
ATCTCGAATGTGCTCCAGAGTACA

>D8PAK:00182:00456
TCAATAATTGTGTGCCGCATTACA

>D8PAK:00182:00461
CTATTGATTGTATGGACGCCTACA

>D8PAK:00182:00472
AATCAAAATGTAACACGCGATACG

>D8PAK:00182:00473
TGACTGTCTGTATGCGAGACTACA

>D8PAK:00182:00484
CGTACTCTCCCATCCTGTGACACT

>D8PAK:00183:00486
CAATCAATTGTATTCGGTATTACA

>D8PAK:00183:00492
GCAGCAATAGTATTGCCGCGTACA

>D8PAK:00184:00452
GTTGAGTTTGTCGCCAGGCATACA

>D8PAK:00184:00467
CATAGGTTTGTAATGTACCATACA

>D8PAK:00185:00488
GACCCATCTGTGACCTGCATTACA

>D8PAK:00186:00451
ACCTTAATTGTATCTCAGCTCACA

>D8PAK:00186:00480
GGCAAGATTGTATTCCCAGTTACA

>D8PAK:00186:00493
ATTTAAATTGTGCTCCCGGTCACA

>D8PAK:00187:00458
TAGATTGTAATCTCGGTCACATTT

>D8PAK:00187:00492
TTGTACGCTACACTACATTCTGGT

>D8PAK:00187:00499
TTCTCTTTTGTGTCCTAAGATACA

>D8PAK:00188:00459
GACGCAATTGTATGGTACGTCACT

>D8PAK:00188:00488
GCATAGTTTGTATTACAGGCCACA

>D8PAK:00189:00472
TTTTCCAATGTGTTCTAGGACACA

>D8PAK:00189:00476
TTGTAGCCCTGAACACAAACCGTA

>D8PAK:00189:00485
AGTTGAATGTATTCCTGCATACAG

>D8PAK:00189:00495
TTGTAGTCCAGAACACATTCTATC

>D8PAK:00190:00452
ATCATATATGTATTCACCCATACA

>D8PAK:00190:00454
TTGGAGACTCCATCCCATAACCTA

>D8PAK:00190:00462
CCTGACATTGTAATGTCAGTCACA

>D8PAK:00190:00464
TTGTAGCTTGCGATACATATTTTC

>D8PAK:00190:00479
CGCTCAAATGTAGTCCAAACCACA

>D8PAK:00190:00486
CCAAACTCTGTATGCGTGGATACA

>D8PAK:00191:00452
TTGTGGCGCAGAATACAACAGTCA

>D8PAK:00191:00464
TTGTATCCTAGATCACATATCCCG

>D8PAK:00191:00485
ATTGTATTGTGTCTTGGGCTACAT

>D8PAK:00191:00491
TTTACGAATGTAGTGTGGGACACG

>D8PAK:00191:00499
ACCGCCTTCGTATGGTAGAATACA

>D8PAK:00192:00493
AATCAAGTGTAGTTCAGGTCACAA

>D8PAK:00193:00451
ATCGACACTGTATCCTAGGACACA

>D8PAK:00194:00459
TCTGGAATCGTACTCTGTGCTACA

>D8PAK:00194:00473
TTGTGCTCTGTACTACACTTCAAG

>D8PAK:00195:00473
GCCACAAATGTATGCTAGGATACG

>D8PAK:00195:00482
TTGTATGCCCTGATACAATTTGAC

>D8PAK:00195:00494
CTTACGTTTGTATCCTCGCGCACA

>D8PAK:00196:00477
TATAACATTGTCTGTCAGGATACA

>D8PAK:00197:00454
GGAATAAAAGTGTCCTCGACTACA

>D8PAK:00197:00466
GCAAAGTTTGTACGCTCGCTTACA

>D8PAK:00197:00472
CATTCAATTGTGTTCTCCGCCACA

>D8PAK:00198:00461
TTGTATTACGGAATACATTGTAGG

>D8PAK:00198:00493
TTCCAGATTGTATTGCTACCTACA

>D8PAK:00199:00471
CCTATAACTGTGTCATACACTACA

>D8PAK:00199:00494
GTGTATGCTGGGCTACATGTATGA

>D8PAK:00150:00507
CAATACTTTGTAGTCTCGCATACA

>D8PAK:00150:00515
AAAAATTGAATTCGCGACTACATT

>D8PAK:00151:00518
GGCAGCATTGTGGTTTGCGCTACA

>D8PAK:00152:00505
GTGTAGCCTGCGCTACAAAAATAT

>D8PAK:00152:00515
CCAGCAATTGTAGTTTGGCTTACT

>D8PAK:00152:00543
TTTAAATTGTGTGCTAGACTACGG

>D8PAK:00153:00502
CCATAGATTGTGTCTTAGAACACA

>D8PAK:00153:00519
AGAATAATTGTACGCTCAGTTACA

>D8PAK:00153:00535
TTTATTTTGTATGCTGTAATACAC

>D8PAK:00153:00538
TTACAACTCGTATTGTAGACTACA

>D8PAK:00154:00535
GTGAATGTGTCCTACACTACAATT

>D8PAK:00155:00501
TTACTCTTCCCATCCCGGGTGTCC

>D8PAK:00155:00534
ATAGTGTTTGTAATCTGTACTACT

>D8PAK:00155:00546
TTGTATTTCATCCCACACTCTGAT

>D8PAK:00156:00530
AAGGGATTTGTAGCGCAGGTTACA

>D8PAK:00156:00536
GCAAACTTTGTATTACATAGTACA

>D8PAK:00156:00547
TTGTAATGCAAATTACATTTGTCA

>D8PAK:00157:00504
TAATAGAACGTAGCCTAGGACACT

>D8PAK:00158:00543
ACGTCAAATGTGCTCCAAGTTACA

>D8PAK:00158:00544
TCGAAGATTGTAGTGCATACTACT

>D8PAK:00159:00502
TTGTAGTCGTGGTATATCATTTGA

>D8PAK:00159:00537
TTATCAAATGTACCTTAGGCTACA

>D8PAK:00160:00522
GTGAACTTTGTATCTCAAAGCACA

>D8PAK:00160:00525
AACAATATTGTGATTTAGGATACA

>D8PAK:00161:00504
ATAATGATTGTATCCCCCACCACA

>D8PAK:00161:00522
GAACTAATGGTATCCCAAGCTACA

>D8PAK:00162:00508
GTTGGGATTGTGACCGGGGATACT

>D8PAK:00162:00512
CCTAACATTGTATTCCACATTACG

>D8PAK:00162:00525
CCGGTGCCTACATCCGCACCTTTC

>D8PAK:00162:00540
GTCTCAACTGTAACTTAGCATACA

>D8PAK:00162:00543
TATTGGATTGTAGTCCCTGATACT

>D8PAK:00163:00539
CCAAACATCGTAATGCACGCTACG

>D8PAK:00163:00549
CCCCTCTTTGCATCCAGGCTACTT

>D8PAK:00164:00530
CATGATTTGTAACCTAGCTCACAC

>D8PAK:00165:00522
ACTGTGTTTGTGACCCACGCCACA

>D8PAK:00165:00549
CACACAATTGTAACCTGAAACACA

>D8PAK:00166:00501
ACCAAGAATGTAGCACAGCATACA

>D8PAK:00166:00502
AATACAATTGTAGTTCCAAATCCA

>D8PAK:00166:00519
ATCAGAACAGTATGCGAGGTCACA

>D8PAK:00166:00521
AGGGAATTGTGATCTGAGCTACAC

>D8PAK:00166:00539
ATATTTTTTCATCCTTTTCACTAG

>D8PAK:00166:00549
ATGTAGTCTAGGCTACAGTATCTT

>D8PAK:00167:00501
GAACTTTTTGTAACCCAGGGCACA

>D8PAK:00167:00540
ATCTCGACTGTATCTTGCGCTACA

>D8PAK:00168:00505
ACCACGGGGCGCATCCTGAAAGAA

>D8PAK:00169:00514
TTATGGATTGTAATCTGGCCCACA

>D8PAK:00169:00545
AGCTCAACTGTAACATGAGTTACA

>D8PAK:00169:00547
AGTCTTATTGTAACCTAGGACACT

>D8PAK:00170:00508
TTTCAAATTGTAACTTAGATCACT

>D8PAK:00170:00515
ATTATATTTGTAGCCGCGCTTACA

>D8PAK:00171:00519
ATTATTATTGTATTCTAAGCTACA

>D8PAK:00172:00525
CTTACCATTGTATGCTGGCCTACG

>D8PAK:00173:00504
ACTTCCTGACCATCCAATAATTAG

>D8PAK:00173:00524
ATTTTTGTGCACTCGCATACAATC

>D8PAK:00173:00526
AGTTTGATTGTATTGCTCACCACA

>D8PAK:00173:00529
ATGGCCTTTGTACTGTAGAATACA

>D8PAK:00174:00510
ATGTACCCTGGAATACATTCCCAC

>D8PAK:00175:00507
ATGTAATTGTGTCCCAGCATACAA

>D8PAK:00176:00504
AACTCGAATGTATTAAGCGATACA

>D8PAK:00176:00535
GTAATCTTACATCCGTATTCCAAT

>D8PAK:00176:00539
CCCGCAATTGTGCTCTGTAGTACA

>D8PAK:00177:00508
TTGTACGCCAGGATACATTCCGTC

>D8PAK:00177:00512
TCAAAGATTGTGGCTATGGCTACA

>D8PAK:00177:00542
ATGTAGCCTGTGATACCTTTCGTA

>D8PAK:00178:00506
CCCATCCAAACATCCATGCCTTCT

>D8PAK:00178:00533
CCGGAAGTGTAACCGGGGTCACAT

>D8PAK:00178:00540
ACCAATACCGTAGGCTACGCTACA

>D8PAK:00179:00518
TCATTGTAGCCTACCATACATATC

>D8PAK:00179:00521
TTCTACACTGTGGGCCGGCACACA

>D8PAK:00180:00537
GCCATCTCTGTATTCTGCAGCACA

>D8PAK:00181:00535
CCCGCGATTGTAGTCCACACTTCA

>D8PAK:00181:00537
ATCTCAATTGTATGACGCAATACT

>D8PAK:00181:00543
AAGATGTTTGTATGCAGCGTCACT

>D8PAK:00182:00504
CACTTGGCGGCATCCGTCTAAGTA

>D8PAK:00182:00532
AACAACTTTGTAATCTGGGTCACC

>D8PAK:00184:00510
TTTACATTGTGCTCTGCCCTACAA

>D8PAK:00184:00529
AATATAAATGTGTCCCGAGCTACA

>D8PAK:00185:00500
TTAGCTTTTGTATGTCACACCACA

>D8PAK:00185:00545
ATGACGAGTGTGACCCAGGGCACA

>D8PAK:00186:00504
GTTTGATTTGTGTTCCAGCATACT

>D8PAK:00186:00544
CACATTGTAAGACGGACTACAATA

>D8PAK:00187:00501
GGTTAGAATGTATGCCGGCACACC

>D8PAK:00187:00544
CCCCGAATTGTGATTAGGACTACT

>D8PAK:00187:00545
ATAGAACTGTAGTTCGTAATACAA

>D8PAK:00188:00523
TCACACCGCGCATCCCTGGGTACG

>D8PAK:00188:00532
GAATTGTATGCTAACATACAATAT

>D8PAK:00189:00535
GTTTTAAATGAATGCTGGGCCACA

>D8PAK:00189:00536
ATACGATTTGTATGATGCGCTACT

>D8PAK:00190:00519
ATTTTTACTGTAACCCGTGTTACA

>D8PAK:00190:00528
TTGAACATTGTGGGCCAGACTACC

>D8PAK:00191:00511
GACAGGAATGTATCCGCGCATACA

>D8PAK:00191:00543
TCAGCGACTGTATTCCAAGTCACA

>D8PAK:00193:00543
CCAATAATTGTATTAGGGCCTACT

>D8PAK:00194:00513
AAGAGAAACGTATCATACGTCACA

>D8PAK:00194:00519
TCCTAAATTGTGTCATGGATCACG

>D8PAK:00194:00529
CTATAAATTGTGCTATGCGTTACA

>D8PAK:00195:00509
GACCGAATCGTGGCGTGGGTCACA

>D8PAK:00195:00517
CTGAAACTGTATTCCACAATACAA

>D8PAK:00195:00533
GCTGACAATGTATCACACCATACA

>D8PAK:00195:00537
GATTATCCCACATCCGCATTCACG

>D8PAK:00195:00543
ACTGCAAATGTATGCCAAGCTACA

>D8PAK:00196:00504
AGACCAACTGTATGCCAACACACG

>D8PAK:00197:00540
TTGTATGCTACGATACATTACCGC

>D8PAK:00198:00507
TAGGGCACTGTATGCTAGGTCGCA

>D8PAK:00198:00514
TTGTAGTCCTGATTACTATTCGGG

>D8PAK:00198:00515
CTCTGGATTGTAATCTAAGCTACA

>D8PAK:00198:00532
AACTGGAACGTATGCTGTCTTACA

>D8PAK:00198:00542
TGTAGCGCCGGCTACAATTCTAGC

>D8PAK:00199:00529
ACTCAAACTGTACCTTAAATCACA

>D8PAK:00199:00549
CCAATATGTGCCCCAGGCTACTAA

>D8PAK:00150:00576
CAATTCTTTGTGCGCTAGCATACA

>D8PAK:00150:00590
CCAATTGTGCCGTAAGCCACAATC

>D8PAK:00151:00571
TTTTATTCTGTAGCTGGGCCTACA

>D8PAK:00151:00575
TGATGAATGTATGCTAGGACACTA

>D8PAK:00151:00584
CTTAAGAACGTAATTCGGACTACA

>D8PAK:00151:00593
ATGTAACCCAGAATACAAATACTA

>D8PAK:00152:00559
TTGTAGCCTCAAATACAATTGAAA

>D8PAK:00152:00565
AAAACAGTATGCTACACTACATTC

>D8PAK:00152:00578
CATCATATTGTACTCTGCGTCACA

>D8PAK:00152:00588
TTTTCATATGTATCCCGAGATACA

>D8PAK:00153:00556
GTGGCGATTGTGTCCCATCATACG

>D8PAK:00154:00589
ATTTAATTGTAGTGGAGCTTACAA

>D8PAK:00158:00557
CTGCGTATTGTAGCCTGTGTTACT

>D8PAK:00159:00567
CTTTAAACTGTATGCTAGGCTTCG

>D8PAK:00159:00577
AATTTTTTTGTATGTTAAAATACA

>D8PAK:00159:00580
AATATAACTGTATCTCCGCCTACA

>D8PAK:00160:00563
AAGTTTGTAGTTTGTAGTACAATT

>D8PAK:00160:00579
AGTGAGATAGTAACCTAGGTTACA

>D8PAK:00161:00568
TTGTAGGCTAGGGCACTTTCATAC

>D8PAK:00161:00589
CCTCAGAATGTGGGCTGTCCTACA

>D8PAK:00162:00576
TTGTAGTTTGGAATACAATAGTAC

>D8PAK:00162:00582
ACGAGAATTGTAATCTGGACCACG

>D8PAK:00163:00582
AGTAAAAACGTAGCCTAAGGCACA

>D8PAK:00163:00594
TATCACTTTGTAATAGGGGGCACA

>D8PAK:00163:00599
AGTCAAAACGTATTCCAAGCCACA

>D8PAK:00164:00553
TTACAGATTGTAGCTTACAATACA

>D8PAK:00164:00559
AAAATATTTGTATTGGCGGATACA

>D8PAK:00164:00564
TTGTAGCCTGCATTACAATCACTG

>D8PAK:00164:00566
CATGAAATTGTAATGTATGCTACT

>D8PAK:00164:00577
CCTCGGACTGTGTCATAGGTCACT

>D8PAK:00164:00582
TTGTATTGTGTATTACAGTGTTAA

>D8PAK:00164:00587
TTTGGATTTGTGTTCTACACTACT

>D8PAK:00164:00599
TTGTGGTTTGACATACAGTTGTTA

>D8PAK:00165:00577
CGTTTTTCTGTAGCTTAGATTACA

>D8PAK:00165:00588
AAAGAGAAAGTAATCTGGCCTACA

>D8PAK:00166:00554
ACAGGGAACGTGCCCTAGACCACA

>D8PAK:00166:00563
AATTTAAATGTAGTATCAACCACA

>D8PAK:00166:00568
TTGTATTGTGATCTACAGTACAAA

>D8PAK:00166:00588
TCTAAAACTGTAACTTGGCATACG

>D8PAK:00167:00551
ATGTAGTCCGCGATACAATGTCCG

>D8PAK:00167:00552
ATCTAAAATGTGACTCTTAATACA

>D8PAK:00167:00557
GCCTACTATGTATTCGAGGATACA

>D8PAK:00168:00557
ACGGGCAATGTATCCCAAATTACA

>D8PAK:00169:00552
ATCTCATTTGTAGTTTGGGACACA

>D8PAK:00170:00565
ATTATAAATGTGATCCAGGGTACA

>D8PAK:00170:00568
TAGCAGTTTGTGACTTGGATCACT

>D8PAK:00170:00580
GTATCAATTGTATTCTAGCATCCG

>D8PAK:00171:00585
CCCGGATTGTGACTTAGATTACTT

>D8PAK:00172:00560
TTTGCTATTGTAAGATACGCTACA

>D8PAK:00172:00586
CTGTGAATTGTGATGTGAGTTACT

>D8PAK:00173:00570
AGTTCCATTGTAGCCAGGGGCACA

>D8PAK:00173:00575
GACGCGATTGTGATCTGGGATAAG

>D8PAK:00174:00588
GAGTCAATAGTATCCTACGCTACA

>D8PAK:00174:00599
TGACTGTTTGTATTCCCAGTCACA

>D8PAK:00175:00561
AGCTAAAATGTGGCGTGGCTCACT

>D8PAK:00175:00581
TACTTTGTGCCCCAGCTTACATTT

>D8PAK:00176:00558
GGTTTTTTGTGCCCGGGCATACAA

>D8PAK:00176:00599
CATGTCTCTGTAACATAGCATACA

>D8PAK:00177:00596
TCTGACAATGTATGTGCGCATACA

>D8PAK:00177:00598
ATTAATACTGTGGGCCGGATTACA

>D8PAK:00178:00569
GTTTAGTAGCCTAGCCCACAATTC

>D8PAK:00178:00572
ACCTGTATGCTGGGTTACAATGTT

>D8PAK:00178:00593
TTGAAAAGTGTGCCCGGGACTACG

>D8PAK:00179:00576
GTGGAATAAGTGGCCTAGCCTACA

>D8PAK:00180:00576
AACATTGTATCCTAGGCCACAAGG

>D8PAK:00180:00584
TTGGGAATTGTATCCTACTTCACT

>D8PAK:00181:00550
CATAAAATCGTATCCTAGCCTACA

>D8PAK:00181:00552
ATGTAATCCACAATACAGAAAAAT

>D8PAK:00181:00579
CCGGAATTTGTATGCTGCCATACG

>D8PAK:00182:00570
TTTATAATGTGTCTCAGACTACAA

>D8PAK:00182:00598
TTTAACTAAGTAGTCCGACCTACA

>D8PAK:00183:00562
CTGGAATTGTATTCAGAGTTACAA

>D8PAK:00183:00566
GTCGAGAATGTAAGCACGAATACT

>D8PAK:00183:00569
TTGTAAGCTATCTTACAATTTTCT

>D8PAK:00183:00577
TTGTGGTCTGGACTACTTGTTATG

>D8PAK:00184:00567
TTGTGTTCGGGAATACAAATATTA

>D8PAK:00184:00589
GATTGTCACTTGGCATACAATCGT

>D8PAK:00185:00555
ATGTAGAAAGTATTCGAGGTTACA

>D8PAK:00185:00577
ACGAAGATTGTGTTACACATTACA

>D8PAK:00185:00579
TTTCTTATTGTGTTCCACAATACT

>D8PAK:00185:00598
GTATGCGATTCATCCATTTACATA

>D8PAK:00186:00572
GCAATTGTGGGCTATAATACAATA

>D8PAK:00186:00596
TTTCTTTTGTGCCCCAGACTACAC

>D8PAK:00187:00568
TTCTCTACTGTACTGTGGAATACA

>D8PAK:00187:00571
TTGTAGTCCATGACACGTTTTGTT

>D8PAK:00188:00551
GAGTCAATGGTATCCCGGCATACG

>D8PAK:00188:00552
GCAATGAATGTATAGCAGCATACA

>D8PAK:00188:00579
TTTTAGTTTGTAGCCTGAGATACA

>D8PAK:00189:00566
AAAATCATTGTGAGTTGAACTACA

>D8PAK:00190:00552
TTGTATGCTACATTACATTCTGTC

>D8PAK:00190:00559
TCGCTGCATCCAGCATAAACTGAC

>D8PAK:00191:00563
AATGATTTTGTGACCCTGCATACA

>D8PAK:00191:00588
AGGGCCAATGTGCCCCAGAGTACA

>D8PAK:00192:00558
AAATGTATCCGGGACTACTTTCAT

>D8PAK:00192:00567
CTCTTAACCGTATTCTATATTACA

>D8PAK:00192:00573
AATTTGATTGTGCTGGGCCATACT

>D8PAK:00192:00591
TTTGTAACTGTAGCGGGTACTACA

>D8PAK:00193:00561
TGTGGTTTCGTAACCTAGGCTACA

>D8PAK:00193:00570
TTGTAATCCTGACTACTAAATTTA

>D8PAK:00193:00587
CAAATTTGTATTCTGGCCTACAGA

>D8PAK:00194:00555
AATATGTGTATGCTAGGATACAGA

>D8PAK:00194:00575
ATATGCATTGTGTCCTGAAATACT

>D8PAK:00194:00576
CTGTATTCCAGCATACATTCTTCG

>D8PAK:00194:00586
ACATGGACTGTAGTTTAGCATACA

>D8PAK:00194:00590
GAACAGATTGTACGACTGGTCACA

>D8PAK:00194:00597
TGGAATGTGCTTTGGGATACAAAC

>D8PAK:00195:00557
ATTTTTACTGTGCCTTAGACTACA

>D8PAK:00195:00595
TATTACTGTAGGCTGTGCTACAAG

>D8PAK:00196:00554
CTCCTAAACGTGACCCAGGCTACT

>D8PAK:00196:00563
CTACTGATTGTAGTCCTGCGCACA

>D8PAK:00196:00594
TTTTGAAAAGTGTCCCATGCTACA

>D8PAK:00196:00595
CAATTGTATCCTAGGTCACAATAC

>D8PAK:00197:00586
CACATTGTAGCGCAAATTACATAT

>D8PAK:00197:00598
TTCTCGACTGTAGCCCAAACTACC

>D8PAK:00199:00573
AAAAAGTTTGTATCATTAAATACA

>D8PAK:00199:00599
ATAGCGATTGTATTCAGGTCCACA

>D8PAK:00150:00604
ATTATATTTGTAGCCGCGCTTACA

>D8PAK:00150:00633
CGAGGATTTGTATTCTGGCATATT

>D8PAK:00150:00634
CATCGGACTGTATGCGAGCATACT

>D8PAK:00154:00603
AGTTATTAAGTATGCTGGGCCACA

>D8PAK:00154:00624
TCCCGAATTGTACGCCAGAATACC

>D8PAK:00154:00630
TGTATGCTGCGCTACAGTTTAACA

>D8PAK:00154:00633
ACCATAATTGTATTCTAGCCTATG

>D8PAK:00154:00635
AGATTGTATTCTAGAACACATTTT

>D8PAK:00155:00627
GGAACAGTAGTCTAGAACACAATT

>D8PAK:00155:00641
AAGTAGAAGGTAGCCTGAAATACA

>D8PAK:00156:00604
ATGTGCTTTGTAAGGTGGGATACA

>D8PAK:00156:00613
AGTAGCATTGTATGCTACCTTACA

>D8PAK:00156:00619
ATACAATTTGTGGTGGGGATTACA

>D8PAK:00156:00639
TCCGATCTACCATCCTATTACTTC

>D8PAK:00157:00614
GGAGAGAATGTATTCTACAATGCT

>D8PAK:00157:00625
CCTGACTATGTGACCCACGATACA

>D8PAK:00157:00644
TTTTCAACTGTGATGGAGCTTACA

>D8PAK:00157:00648
CCCGTGTTTGTATGTTGTGACACA

>D8PAK:00158:00603
TTGTATTCTGGCATACGGTAAAGC

>D8PAK:00158:00607
TCTTGACTGTGTTCTGGACTACAC

>D8PAK:00158:00614
CCCTGAATTGTACGCTGGCCTACT

>D8PAK:00158:00623
TCCCGTATTGTATCCTAGATTACA

>D8PAK:00158:00643
GAGGGATTGTATTCTGGCGTACTA

>D8PAK:00158:00644
AAAGATTGTGTCCTGGCATGCTTT

>D8PAK:00158:00648
TTGTAACCCAGCCCACTTTTATGT

>D8PAK:00159:00612
GCAGAAACTGTATTAAGGCACACA

>D8PAK:00159:00617
TTGTATCCTCTCCTACAATTTACC

>D8PAK:00160:00605
GCCTCGTTTGTATGCCATATTACT

>D8PAK:00160:00649
CCATGAAACGTATCACAGCATACA

>D8PAK:00161:00612
TTAAGAACTGTACCCTATGCTACA

>D8PAK:00161:00623
TTTGCCTTTGTATTCCAGATTACT

>D8PAK:00161:00633
ATCACCTTTGTATGATACCATACA

>D8PAK:00161:00649
TTGTGGCCCAGCTTACATTTGATT

>D8PAK:00162:00633
CTGTAGGCTAGCTTACAGTGTCAT

>D8PAK:00162:00646
TATTGGTTTGTACCTTAGAATACT

>D8PAK:00163:00623
CAACCAATTGTAGTTTAACGTACA

>D8PAK:00163:00630
ACGGCATCTGTAACCTAGATTACA

>D8PAK:00163:00633
TGGCGGATTGTATTCTGTACTACC

>D8PAK:00164:00604
AAAAAGTTAGTATTGTAGACCACT

>D8PAK:00164:00632
CATAGGATTGTGGTCCTAGCTACA

>D8PAK:00165:00607
CTGTATTGCCCGATACAAATGGCT

>D8PAK:00165:00621
CATTTAAATGTGTCCGTGAATACA

>D8PAK:00165:00637
GCTTACATTGTAGCCTGAAGTACG

>D8PAK:00165:00649
ATGTGACCCGTAATACATTCTCTA

>D8PAK:00166:00617
GGTAAAAATGTATGATGCGGCACA

>D8PAK:00166:00633
CCTAAAATTGTGACCTGGAATAAC

>D8PAK:00167:00601
GTTCGCAATGTAGCACAGAATACT

>D8PAK:00167:00614
ACGTGAAATGTATTGGGTGCTACA

>D8PAK:00168:00620
TGAATTGTACGCAGCAATACAGAA

>D8PAK:00168:00645
CACGGCATTGTAACCCCTACTACT

>D8PAK:00169:00600
CGCATTGTGTCCCAGGTCACAGAG

>D8PAK:00169:00611
ATTCAATTTGTATGATATAATACA

>D8PAK:00169:00640
CACGGGATTGTAATGCGCACCACA

>D8PAK:00169:00647
ATACCGATCGTGTGCTAGCTTACA

>D8PAK:00170:00617
TTATAATTTGTGGGCCCGATTACA

>D8PAK:00170:00624
TTGTCAATTGTGTGCTGGATTACT

>D8PAK:00170:00640
TTATCAATCGTAATCTAAGCTACA

>D8PAK:00171:00632
TGCAGGGCACCATCCTCCCATCAG

>D8PAK:00171:00640
GAAAACTTTGTGGCGTAGCACACA

>D8PAK:00172:00643
AACCATTTTGTAAGATGCCATACA

>D8PAK:00172:00648
AGCAAATATGTAGCCTCGCATACA

>D8PAK:00173:00611
AATTTTGTAATCTGTGCTACAATC

>D8PAK:00173:00615
GGTTTGTGGTCTAGAACACAATTC

>D8PAK:00174:00600
TTTGGTTGTGTATTGTAGGATACA

>D8PAK:00174:00626
ACACTAATAGTAGTCCAGATTACA

>D8PAK:00174:00638
TTGTATTCTGGAATACTATTAAAA

>D8PAK:00175:00604
TAGCCGATTGTATGTTATGCCACA

>D8PAK:00175:00613
ACGGGAAATGTAATCCGGACTACC

>D8PAK:00175:00615
ACTGTGTTTGTATGCCACAATACT

>D8PAK:00175:00621
TAAAAGATTGTACCCCAGAACCCG

>D8PAK:00175:00649
GAGTTAAATGTGCTTCAGCATACA

>D8PAK:00176:00612
GGCTCAATTGTGTCCCGCCATACC

>D8PAK:00176:00646
ACTCTTTCTGTATTCTGAGCTACA

>D8PAK:00177:00611
GTGAAATTTGTATTCCTCACTACT

>D8PAK:00178:00612
TTGTAACCTGCGATACATTTCTAT

>D8PAK:00179:00641
TTTACAAATGTGGTACAAGCTACA

>D8PAK:00179:00643
ACTATTCTGTGCCCTGCACTACAA

>D8PAK:00179:00646
AAGAACATTGTAATCTGGCGTACT

>D8PAK:00180:00603
TTGTATCGTAGCATACTATGTTTG

>D8PAK:00180:00604
TCGAAATGTGACCTATCATACGAA

>D8PAK:00181:00607
ATTCACTTTGTGTCCCAAGATACA

>D8PAK:00181:00614
CTTTGTATCCTATGCTACAATTAT

>D8PAK:00181:00625
TACAAAAATGTATCCCCGACTACT

>D8PAK:00182:00612
ACGTGAAATGTATTGGGTGCTACA

>D8PAK:00182:00613
AATTTTTTTGTATGTTAAAATACA

>D8PAK:00182:00616
GTCCTGAATGTGCTCCAAAATACA

>D8PAK:00182:00624
CATGATTGTAACGTACACTACTTA

>D8PAK:00182:00641
TTACTCTTTGTATTCTGTACTACA

>D8PAK:00182:00642
ACGGGAATGCGTCCTGTCCCCGTG

>D8PAK:00184:00615
CGCCATTTTGTACTCTAGATCACA

>D8PAK:00185:00604
CCTCGAACCGTGCTTTGGCATACA

>D8PAK:00185:00623
TTTGTGTTTGTATTCCTGCGTACA

>D8PAK:00186:00635
TTGCTAACTGTGCGCTACACCACA

>D8PAK:00187:00634
GAGCTACATGTATTGCACGTTACA

>D8PAK:00188:00622
CTTACAATTGTAGCCTAGATTGCT

>D8PAK:00188:00625
GCTAACTTTGTGTCCTGAGCTACT

>D8PAK:00188:00631
AACATTGTATGCTGAAATACAGAG

>D8PAK:00189:00602
AGAAACTGTGGCCTACCCTACTAA

>D8PAK:00189:00610
ATCCACATGACATCCTGTTATAAG

>D8PAK:00189:00646
CTGTGTCCTGGCATACAAAAATTC

>D8PAK:00190:00614
ACTTCGAATGTATCCCAGGCTTAA

>D8PAK:00190:00640
ATGAAGACTGTATCCGACACTACA

>D8PAK:00190:00642
GACATCATTGTATTCTATACTACA

>D8PAK:00191:00626
ACGATGACTGTATCCCGCCATACA

>D8PAK:00191:00627
AATACTGTATTTCAGGACACAATC

>D8PAK:00191:00639
AATTAATTGTATTGCAACACACAT

>D8PAK:00191:00644
CTACTAACTGTAGCCTAGGCTACG

>D8PAK:00192:00604
GTTGCGTTTGTATTTCAGGCTACA

>D8PAK:00192:00618
CTGCGAATAGTGGCCCACAGCACA

>D8PAK:00192:00647
AGCCTAATTGTATTCTGGACTAAA

>D8PAK:00193:00601
TTGTGCTGTAGAATACAAATACAT

>D8PAK:00193:00619
CAGAGAATTGTGACCCCTGCGACA

>D8PAK:00193:00620
TTTTAGAATGTATGTTACGGTACA

>D8PAK:00193:00622
CTATTTATGTATTCCCCACTACAG

>D8PAK:00193:00631
TAGTGACCCAGCACACAATGTTTC

>D8PAK:00193:00635
TTGTACGCTACACTACATTCTGGT

>D8PAK:00193:00645
ACCCATTTGTATGCCAGGCTACAT

>D8PAK:00194:00610
GCCGCGATAGTAGCCTGAGTTACA

>D8PAK:00194:00617
TTTAGAAATGTAGGCTAGAATACA

>D8PAK:00194:00620
GCTAAGACTGTAGCAAGGGATACA

>D8PAK:00194:00628
CAAATATTTGTAGCCTGTCATACT

>D8PAK:00194:00645
GTGTGCCCTGGCATACAGTTGGAT

>D8PAK:00195:00600
AAGCAAATCGTAATGTAGCATACA

>D8PAK:00195:00606
GATTAACGTGTATGCGGCGCCACA

>D8PAK:00195:00607
TCCCGAATTGTGTGCTCGGTTACT

>D8PAK:00195:00642
CAACTTGTAGTACAGGGCACATTT

>D8PAK:00196:00625
TAATAAAATGTATGCCAGGACCCA

>D8PAK:00197:00615
AAGAGTATTGTAACATAGGTTACA

>D8PAK:00197:00648
CTAAAAATTGTAACCCCTCTTACA

>D8PAK:00199:00623
GTATAAACTGTAAGCCACAATACA

>D8PAK:00150:00662
CGTCGATTAGTAACCTAAGACACA

>D8PAK:00150:00666
AACCTTTTTGTATCGCAGGATACA

>D8PAK:00150:00682
GCATAAAATGTATTCTGGCATACG

>D8PAK:00151:00668
CTGAATTGTACTGTAGCATACTAA

>D8PAK:00151:00669
AGTCGTTTTGTGACCCGTAATACA

>D8PAK:00151:00670
TTGTATTCCTGAGTACAATTAAAC

>D8PAK:00151:00691
TTTTAAAATGTAAGTAAGGCTACA

>D8PAK:00152:00654
ACCGTAAATGTGACTGACCATACA

>D8PAK:00152:00659
ATTTAAATTGTGAGCAATAATACA

>D8PAK:00152:00664
ACGTAATTGTGATTTAGCCCACAG

>D8PAK:00152:00666
ATATAGATTGTAGTACATGACACA

>D8PAK:00152:00667
GAAAAAATGTATCCCATAATACAA

>D8PAK:00153:00672
CTGGAACTTGTATTGTCCAATACA

>D8PAK:00153:00689
ACCGAATTGTATGCTAAGTTACAT

>D8PAK:00153:00691
AAACAATTTGTAGCCAGGGACACT

>D8PAK:00154:00666
AGTCGTTTTGTGACCCGTAATACA

>D8PAK:00155:00671
AACCAGTTCGTAACCCAGGTCACA

>D8PAK:00155:00682
ATTCTAATTGTGGCCTATGTTACT

>D8PAK:00156:00682
TTAGAAACTGTGTGTCTGAATACA

>D8PAK:00157:00650
TGAGAGTGTATGCCAGACTACTCT

>D8PAK:00157:00663
GTTGACTATGTACGCTAGGTCACA

>D8PAK:00157:00673
ATGGCCTTAACATCCGATCCCCTC

>D8PAK:00158:00662
GTTAAGTAAACATCCTGAAGGTTG

>D8PAK:00158:00674
TATTCAAACCGTAGCCCTGATTAC

>D8PAK:00160:00652
CTCCCAACAGTATTGCAGGATACA

>D8PAK:00160:00671
ACTCCAATAGTGCTCCAGATTACA

>D8PAK:00160:00687
GCATATTTTGTAATCTAGAACACT

>D8PAK:00160:00691
TGCCACAAATCATCCACTCCACCC

>D8PAK:00161:00666
GATTGTGTCCCGCATCACAATTAG

>D8PAK:00161:00680
TGTCGAATTGTATGTTATGTTACA

>D8PAK:00161:00683
CTTTTTTTTGTACTACAACCTACA

>D8PAK:00162:00656
CTGAATATTGTATCGTACCATACT

>D8PAK:00162:00686
AATGTAGTAGTGTGTCCATAATAC

>D8PAK:00163:00655
ACTAAACTGTGCCCTAGACTACAA

>D8PAK:00163:00657
TAGTAGTCTGGAATACAATCGTCC

>D8PAK:00163:00658
GATCTATTTGTGGCGCATACTACT

>D8PAK:00164:00687
GTCGTAATTGTGGCCTCGGTCACA

>D8PAK:00165:00671
ACTCCAATTGTACGTTCGAATACA

>D8PAK:00165:00691
CTAGCAATAGTAGTCCATCATACA

>D8PAK:00166:00653
TACCAGATCGTATTCCAGGACACT

>D8PAK:00166:00667
TTTGCAAATTGTACCCTGAAATAC

>D8PAK:00166:00685
TTACAGAATGTATCCTGGTATACT

>D8PAK:00167:00665
TCCGCGATAGTAGTCTGCACGACA

>D8PAK:00167:00670
TACCCGATAGTGGCCCTCAATACA

>D8PAK:00167:00682
CATTGGATTGTGGCCGGGGATTCT

>D8PAK:00167:00683
TCTATTGCTACATCCACAGTTCAC

>D8PAK:00167:00687
ATTAACGTGTGCCCCCAGGCTACA

>D8PAK:00167:00697
TTGTAGCTCTCGCCACATTTTGCC

>D8PAK:00168:00660
TTGAATCTGCATCCTACAATACAA

>D8PAK:00168:00661
TGTATGATTGTGGGCCAGATCACA

>D8PAK:00168:00669
ATCCTAATTGTACGCTAGGCCACT

>D8PAK:00168:00685
CATTAAACTGTGACCTGTAATACT

>D8PAK:00168:00688
ATATCGACTGTATGCCACGTTACA

>D8PAK:00169:00656
GTTCTGATTGTATTGTACGGCACA

>D8PAK:00169:00676
GCACGCATTGTGCTCTAGCATACT

>D8PAK:00170:00697
CGTTGAATTGTATGGTGAGCTACA

>D8PAK:00171:00677
TTGTAGCACTGGCCACAATTTTTT

>D8PAK:00171:00680
TAAAATTGTGTATGCCCACATACA

>D8PAK:00172:00656
TTTCGCAAAGTATTTTGGCATACA

>D8PAK:00172:00683
TCACACCAAGCATCCTCCAGTTGC

>D8PAK:00172:00690
TTGTGTTCTAGGCTACAGAAGGTA

>D8PAK:00172:00692
AAATGCACTGTATTATACGCTACT

>D8PAK:00173:00666
TTGTGTGCTAGACTATGATTTCGT

>D8PAK:00173:00693
CCCTCGAAAGTATTCTACAATACA

>D8PAK:00173:00699
TTTAGAACTGTATTCTAGGTTACT

>D8PAK:00174:00655
GATTACATTGTATGCTAGAGTTCA

>D8PAK:00174:00676
TTGTGTCCCACGATACATTTTTGG

>D8PAK:00174:00699
AGCCCAATTGTAGCCTATGACACT

>D8PAK:00175:00654
CATCGAATTGTATGTTACTGCACA

>D8PAK:00175:00658
ATATTGTTTGTAAGCCGGGCTACA

>D8PAK:00175:00666
TTGTGCACCGTAGCCCAGAATACA

>D8PAK:00175:00671
TTTTAAATAGTGCCTCAGATCACT

>D8PAK:00175:00687
ACAAAAATGTGACCTATAATACAA

>D8PAK:00176:00669
TCCCAAATTGTACGCCAGAATACC

>D8PAK:00176:00678
ATGTATTCTAGATCACGTTTTTCG

>D8PAK:00176:00687
TTTAGAACTGTATTCTAGGTTACT

>D8PAK:00177:00652
TTTCTAATTGTATTTTGGCATACC

>D8PAK:00177:00664
TCCAACATTGTATTCCCGATTACT

>D8PAK:00177:00669
ACGAAGTTTGTGTTTCTGAATACA

>D8PAK:00177:00670
CTCGCCATTGTATCCTGGGTTACT

>D8PAK:00177:00692
TTGTTCATTGTATTTCCAGTTACA

>D8PAK:00178:00682
AATTAAAAAGTAAGCCCGAATACA

>D8PAK:00179:00662
TATCAGACTGTGGCCCAAGCTACA

>D8PAK:00179:00699
TTCCCAATTGTGACCTAGTACACT

>D8PAK:00180:00655
CTTAAGACTGTGTCTTACATTACA

>D8PAK:00180:00661
CTCATAATTGTAACTTAGGTTACA

>D8PAK:00180:00663
TTGTAAGGAGGGCCACAATATAAT

>D8PAK:00180:00674
CTCGATACTGTGCCCTAGAACACA

>D8PAK:00180:00684
GCGGAAACTGTGGCCCATGACACA

>D8PAK:00181:00654
TTGTAGCGCACAATACATTCGGGT

>D8PAK:00181:00667
CTACCAAATGTATGGTGGATTACA

>D8PAK:00181:00669
CCCAACTTTGTATCTTCTAATACA

>D8PAK:00182:00660
GCAGAAAAAGTATGCCAAAGTACA

>D8PAK:00182:00690
TTTACGGATTGTAGCGCGGCTCAC

>D8PAK:00183:00657
GAGGAAATGTAGTCTGAGTCACAA

>D8PAK:00183:00697
TGTAACTTTGTATACCGGACTACA

>D8PAK:00184:00670
AACAAAATGTATCCTGGGGTACAC

>D8PAK:00184:00674
GCATGTATTGTGTTCTAGGCCACT

>D8PAK:00184:00684
CCCGCAATTGTGCTCTGTAGTACA

>D8PAK:00185:00679
CTTCACCTTGTGTCCTCGGCTACA

>D8PAK:00185:00690
CAATCCTTTCATCCGAGAGTACGT

>D8PAK:00185:00697
ATGAAACTGTATGATAGGTCACAC

>D8PAK:00186:00657
TACTAAAAGGTATCCCACGCTACA

>D8PAK:00186:00677
CCCTAAACTGGATGCTGCGCTACA

>D8PAK:00187:00653
GAGTGAACTGTGTCCCCCACTACT

>D8PAK:00187:00662
TTTTTAACTGTGCCGTAAATCACA

>D8PAK:00187:00694
GTTCGGATTGTAATCCAGGGCACG

>D8PAK:00188:00660
TTGTACTCCAGGGCACAAACGATC

>D8PAK:00189:00685
GACAACTCTGTGTCTTGAACTACA

>D8PAK:00189:00697
CACCTGACTGTAAGCTGTGCCACA

>D8PAK:00190:00697
TGTACAAATGTAAGTTGGCATACA

>D8PAK:00192:00664
AGAACAATTGTGACTTAACTTACA

>D8PAK:00192:00681
GTTAGCTTTGTAGCCTAAGATACA

>D8PAK:00192:00692
AATAAATTTGTAGTTTACCTTACA

>D8PAK:00193:00656
TATACATTTGTATGCAAGATTACA

>D8PAK:00193:00682
TAGTAAATGTGGTGTGCACTACAA

>D8PAK:00193:00685
TTTACGATAGTGTCTCAACACACA

>D8PAK:00194:00653
TATAGAATTGTGTTCTGGCCCACG

>D8PAK:00195:00666
TTGTATGCTACATTACAAAATTCC

>D8PAK:00195:00667
GTTTTGTTTGTAACTCAGGCCACA

>D8PAK:00195:00670
TCCCTAATTGTCACTCACGTTACA

>D8PAK:00196:00658
CAATAATCTGTATACTGGCATACA

>D8PAK:00196:00662
CAATTGATTGTATTTCACGTTACA

>D8PAK:00196:00671
CTCATTATTGTAGCATAAGACACA

>D8PAK:00196:00673
TTTAGGTTTGTAATCTGGATTACA

>D8PAK:00196:00691
ACTAAGACTGTGATACCGATTACA

>D8PAK:00196:00698
GTGTATGCTACGTCACAGTCTTGC

>D8PAK:00197:00680
TGGACGATTGTACTGTACAATACA

>D8PAK:00198:00672
TGTAAAATGTGGCCTGGGACACAC

>D8PAK:00199:00650
TGGCTAAGTGTATGCCATGCTACA

>D8PAK:00199:00659
CGTTTGTTTGTGGTCTCCATTACA

>D8PAK:00150:00701
CGTTGAACCGTAGTATACGCTACA

>D8PAK:00150:00716
GTAGCACTTGTATTCGGGCATACA

>D8PAK:00150:00723
TAACTATTTGTAAGCCACGCTACA

>D8PAK:00150:00738
TCTCGATTGTATGCGTGCTCACAA

>D8PAK:00150:00739
ACCAATTGTAACTAGGGTTACAAA

>D8PAK:00151:00700
AAGAATTTTGTAAGCTGGACCACT

>D8PAK:00151:00728
AAACTTACTGTGTTCCAGGCTACT

>D8PAK:00152:00706
TTTAAGAAAGTAAGCTGGGATACA

>D8PAK:00152:00738
TTGTATGCTGGGACACTCTTTCTG

>D8PAK:00152:00747
ACCAATTTTGTATCCTTGCCTACA

>D8PAK:00153:00729
ACATTGTATTATAGCGCACACTTT

>D8PAK:00153:00748
ATCCCAATTGTATGGTACAGCACA

>D8PAK:00154:00719
TCTATGACTGTGTTCCCGGTCACA

>D8PAK:00155:00749
TGTTAAAATGTAGTCCAACCTACG

>D8PAK:00156:00703
ATCTTTTTAGTATCTCGGCTTACA

>D8PAK:00156:00727
TGCGTAATTGTGAGCCTGGTTACA

>D8PAK:00156:00729
TCTAATTAGTAAGCTGGGTCACAA

>D8PAK:00156:00730
CTTTTATTGTAATCTACACTACAA

>D8PAK:00156:00739
AATAATTGTAGCCCGAGACACAGA

>D8PAK:00157:00734
AAAATTGTAGTCCTCGATACCTTC

>D8PAK:00158:00719
CGGCAAACTGTAATCCTCCCCACA

>D8PAK:00158:00720
CCTGAGTCTCCATCCGAAATATGA

>D8PAK:00159:00736
TTTGGGTTTGTGTCTCAGGATACG

>D8PAK:00160:00711
TTGTAGTTTGCATTACAATATATA

>D8PAK:00160:00718
ATGTATCCTAGAATACACTTTAAA

>D8PAK:00161:00702
CTCCACACTGTGCCCAAGGCTACA

>D8PAK:00161:00708
AAAAGATTGTAACTCACCATACAT

>D8PAK:00161:00744
AGCAAGACTGTAACACGCGATACT

>D8PAK:00162:00718
TAGTTAAGTGTAATCTAGCCTACA

>D8PAK:00162:00737
ATAATTGTATGGTGGAATACATTC

>D8PAK:00162:00747
TCATGATTTGTGTCATAGGACACA

>D8PAK:00163:00703
ATTATCACTGTAATTCAGCATACA

>D8PAK:00163:00709
TTGTAGCTCGGAATACGTTTTGTG

>D8PAK:00163:00724
TCAAGTACTGTGTCTTAGAACACA

>D8PAK:00163:00747
AACGGCATTGTGCCTAGGCATACA

>D8PAK:00163:00748
TATTAAACTGTATCCTAGAACACT

>D8PAK:00164:00703
TAAAAAATTGTATCGCGCGGCACG

>D8PAK:00164:00709
TCGCAACTCGTGACTTGGAATACA

>D8PAK:00164:00717
CTTCACTATGTATTACGTAATACA

>D8PAK:00164:00737
ACCAACTGTGACGTAAGATACATT

>D8PAK:00164:00743
CAGTATCTTGTATGCCTGAATACA

>D8PAK:00165:00735
TTGTAATCTATCATACTATTCGCT

>D8PAK:00166:00714
ACCACGAATGTATTCAGGACTACT

>D8PAK:00166:00735
GGTAAATATGTAGTTGGGATCACA

>D8PAK:00167:00723
GCATCGACTGTATCTTACATTACA

>D8PAK:00169:00732
TTGTATTCTGTCATACACAATTCC

>D8PAK:00170:00733
TTGTAGTCCACGATACACTTGATA

>D8PAK:00172:00717
TGAACAATTGTGGGCTCGCGTACA

>D8PAK:00172:00722
ATTTTCTTTGTATTAAGAGCTACA

>D8PAK:00172:00741
CATGTAATTGTGCTACAGGCTACA

>D8PAK:00173:00715
CTGTATGCCAGAACACAGTTTTGA

>D8PAK:00173:00748
CATACTGTATTCTAGGCCACATTC

>D8PAK:00174:00705
CATCTGATTGTATTCCGTACCACT

>D8PAK:00174:00717
TTTGAGATTGTATCCCAAGACACT

>D8PAK:00174:00718
TTCCAGATAGTATCCTGGACTACA

>D8PAK:00174:00734
AACTCATCATCCTATTTGTCAGCA

>D8PAK:00175:00706
AGAAAAGGCTCATCCAAGAGGTCC

>D8PAK:00175:00723
TTGTGTGCCAACATACAGTTTTTC

>D8PAK:00175:00735
AGTTGAACTGTGTCCCTGCATACA

>D8PAK:00177:00717
TGACGAATCGTAGGCCCCGCTACA

>D8PAK:00177:00719
TTGTACTCTGGCATACATACTGGT

>D8PAK:00177:00722
TTGTGCTTTGTAGTCTACCGTACA

>D8PAK:00177:00738
CACTAACGCTCATCCCCTTACTTT

>D8PAK:00179:00722
AACCGTCTGTGTGCTATGATACAT

>D8PAK:00179:00736
TTTCAAAATGTGAGACCGGATACA

>D8PAK:00180:00714
CTCTTGCTGCCATCCAGTCATTAG

>D8PAK:00180:00718
CCCGCGTACTCATCCATCATGCAA

>D8PAK:00180:00746
CTTGGCTTTGTACTCTAGAGTACA

>D8PAK:00180:00747
ACACAGTTCTATCTCGTACGTACT

>D8PAK:00181:00714
ATGTGCTCTGGACTACATTTTGGG

>D8PAK:00181:00716
TAGTATTCCATCTTACACTTTTCA

>D8PAK:00181:00720
CGTCAATGGGCATCCACGTCTAAG

>D8PAK:00181:00729
GATACTTTTGTAATATAGGTCACA

>D8PAK:00181:00732
TTTTGATCTGTGATGTACAATACT

>D8PAK:00181:00733
TACAACTTTGTGTCTCAACCCACA

>D8PAK:00181:00739
CTATTAACTGTAAGTTGTATTACA

>D8PAK:00182:00749
ACAAACTTGTAGTCTACAATACTA

>D8PAK:00183:00702
AACACCATTGTATGACAGCACACA

>D8PAK:00183:00747
TTCCCGAATGTATTCCGTGCTACC

>D8PAK:00185:00712
CGTCACATTGTAGTCTAAGACACC

>D8PAK:00185:00715
CAACAAAAAGTGTTCCTGGCTACA

>D8PAK:00186:00714
GTGACCATTGTAGGCCGGGATACG

>D8PAK:00187:00727
GCCCCCTTTGTGCCCCACGCTACA

>D8PAK:00188:00728
CTGTGCCCTAGAACACAGTTAAAC

>D8PAK:00189:00703
ACCCGTCATCCACGGCCTCCCACG

>D8PAK:00189:00730
TACCGGTTTGTACTGTAGGATACA

>D8PAK:00190:00722
TCAAAAGTGTATTCTAGGACACAA

>D8PAK:00191:00712
CATGTAATTGTAATCTATCCTACA

>D8PAK:00191:00733
CCCCAGATTGTATTGTGGATTGCT

>D8PAK:00191:00735
TTGTAGTCCACGATACACTTGATA

>D8PAK:00191:00748
TGTATGCTGTGCTACAGTTTAACA

>D8PAK:00192:00705
CTGTACTCTGGATCACAATTTTGT

>D8PAK:00192:00708
TTGTAACTCAGCATACAAATTCTG

>D8PAK:00192:00738
TTGTGCCCTACGATACTATTGGTC

>D8PAK:00193:00705
AAGCCGATTGTAGCCCTCTATACA

>D8PAK:00193:00726
TAATTTGTACTCTGGCATACAAGA

>D8PAK:00193:00728
TTGTGGGCTATCTTACAAAATAAG

>D8PAK:00193:00732
TAATAGATTGTGTTGCCCATTACA

>D8PAK:00193:00742
AATAAAAAAGTATGCTACATGACA

>D8PAK:00194:00713
CGCAGAATGTAATCCACAGTACAA

>D8PAK:00194:00718
GTTCCGATTGTAGCCTTGGCTACA

>D8PAK:00194:00730
TCATACATTGTAGCTGAACATACA

>D8PAK:00194:00739
ATCACCTTGTGTCACTCGCATGAC

>D8PAK:00194:00743
GCATTTTGTAACCCCCATTACAGA

>D8PAK:00194:00749
AATGAGAGTGTGTTCCTCGGCACA

>D8PAK:00196:00703
CATTGCTATGTACGCTACGCTACA

>D8PAK:00196:00721
TTTACGATTGTAGCATATATTACA

>D8PAK:00196:00731
TTGTATTCTGCGTCACAGATGGTG

>D8PAK:00196:00732
TTTAGGATCGTGTGCTGGGCCACT

>D8PAK:00197:00707
AACTTTATTGTAAGCCAGATTACA

>D8PAK:00197:00709
GTGTATTCCAGCATACACGTTTTG

>D8PAK:00197:00734
CAAGCAATTGTAGTTCTGCATACG

>D8PAK:00197:00737
GAAAAGATGTAACCTGTGCTACAA

>D8PAK:00197:00745
TTGTAGTCCCTCTTACAATTTGTC

>D8PAK:00198:00702
GATTCACTTGTAACCTACACTACA

>D8PAK:00198:00714
ACTCTCATTGTAACCCGCCATACA

>D8PAK:00199:00717
ATGTTGTTTGTAGTGTAGTGCACA

>D8PAK:00151:00767
CCAATCAATGTATGCCATATTACA

>D8PAK:00151:00773
TTTCCAAATGTATTATGGAATACC

>D8PAK:00151:00780
TTGACACTGTAGCCCCCACTACAA

>D8PAK:00151:00788
GACCGAACTGTATTGTGGGCTACC

>D8PAK:00151:00796
AATACGTTTGTAGTCTAGATCACA

>D8PAK:00151:00798
CACCACACTGTGATCCAAGTTACA

>D8PAK:00152:00766
CCCGAAACTGTGACACTGGCTACA

>D8PAK:00152:00767
TTCTCAAATGTAACTCAGGTCACG

>D8PAK:00152:00774
CATGAAAATGTAGGCTGTAATACC

>D8PAK:00152:00787
TCGGTGAGTGTGTCACAGGTCACA

>D8PAK:00152:00789
ACTGGCATTGTACCCGGCGATACA

>D8PAK:00153:00753
TATACGACTGTATCGGAGAACACA

>D8PAK:00153:00775
AAAATTGTAATGTGACTTACAATT

>D8PAK:00153:00784
AAAAAGTCTAGTACTCACACTACA

>D8PAK:00154:00773
CTCGTAATTGTACCCCAGCGTACT

>D8PAK:00154:00782
TCTTCGCATCCGCGCGTTTTCGTT

>D8PAK:00154:00795
AGCATGATTGTATGGGAAGCTACA

>D8PAK:00155:00751
CAATGAAACGTGATTCCCAATACA

>D8PAK:00155:00757
ATCAAGATTGTATTGCCGATTGCA

>D8PAK:00155:00766
AATCGAAATGTACTCCACACTACC

>D8PAK:00155:00776
ATGTGAATTGTATTGTAGAACAAC

>D8PAK:00155:00777
ACCAGCGTGCGCATCCTGTCCGAT

>D8PAK:00156:00772
TATCCAAAAGTATCTCTGGACACA

>D8PAK:00156:00792
GAAGTAATTGTATTCCGCCCCACA

>D8PAK:00157:00751
TAAATAACTGTATCATGTGATACA

>D8PAK:00157:00752
AGGGCGATTGTAGGCCTAACCACT

>D8PAK:00157:00764
ACGTTGATTGTCGTCCAAGCTACA

>D8PAK:00157:00768
ATTCGTTTTGTATCGTTGGCTACA

>D8PAK:00157:00770
AAAACTGTGACGCAACATACAAAC

>D8PAK:00157:00774
ACTAGCATTGTATCATACATCACA

>D8PAK:00157:00782
GCCAACTATGTATTGTACATTACT

>D8PAK:00158:00753
TAAAACTTTGTAACGTACACTACA

>D8PAK:00158:00780
ATTTAGTGAGTAGCGCAGAATACA

>D8PAK:00159:00757
GTGCAGACTGTGACCTGACTCACA

>D8PAK:00159:00790
AGTTTAATTGTAGTTTACGCTACT

>D8PAK:00160:00769
AATCGGAATGTAATGCGGAATACT

>D8PAK:00160:00797
ATCTAAATTGTCACATAGATTACA

>D8PAK:00161:00758
CTAACAATAGTATTGAAGACTACA

>D8PAK:00161:00763
AGTGGCACTGTATGCTGGACTACT

>D8PAK:00161:00777
TCCACTTTGTGCCCCAAGTTACAA

>D8PAK:00161:00781
CTGGTGATTGTATCCTAGGCTGCA

>D8PAK:00163:00760
CACTAGTTTGTGATCCTGGACACA

>D8PAK:00163:00790
GTCTCGATTGTATCTGACACTACA

>D8PAK:00163:00794
GTGCTGATTGGATGCTACAACACA

>D8PAK:00164:00760
TCGCTTTTTGTAGCGCGTAATACA

>D8PAK:00164:00763
CTCACAAATGTATCGCTGACTACT

>D8PAK:00164:00771
TTCCATTTTGTATGCAGGCATACA

>D8PAK:00164:00794
ACATTTATTGTCAGCCTACGATAC

>D8PAK:00164:00799
TTCAATATAACATCCATACAAGAT

>D8PAK:00165:00751
ATGTGAAAAGTAGCGCGTGATACA

>D8PAK:00165:00763
TTTTCGTCTGTATCCTGGAACCAA

>D8PAK:00165:00769
GTCACAAATTGTACGCCTGCTACA

>D8PAK:00165:00774
TTGTATGCCATGATACTATTCCTT

>D8PAK:00165:00785
ATTAAATGTGTGCCCGAGGTTACA

>D8PAK:00165:00794
GCCAGGAAAGTATGCTAGGATACT

>D8PAK:00166:00762
TCAGAAAATGTACTCCTGGACACA

>D8PAK:00166:00784
AACTCTTATGTAGTCTAGAATACA

>D8PAK:00167:00752
CAAGGGAATTGTAACTCGGATCAC

>D8PAK:00167:00773
TTGCCAATTGTGTCATAGAATACG

>D8PAK:00167:00785
TTGTATTCACTAATACAGTTTGGT

>D8PAK:00168:00759
AGCCACATTGTGAGTTACGATACA

>D8PAK:00169:00755
TCGTAGATCCCATCCGCTCCCGTA

>D8PAK:00169:00769
ATGTTAAGTGTACTCGCGCATACA

>D8PAK:00169:00771
AGGTCTCCACACCCGCGCACTTAG

>D8PAK:00169:00773
TTGTGTCCTGGCATACAATTTACG

>D8PAK:00169:00784
CTTTTTATTGTAACCCAAGGCACA

>D8PAK:00169:00794
GTCTGGAATGTGAACTAGCTTACA

>D8PAK:00170:00753
CGTGCAAATGTATGCCAGATCACT

>D8PAK:00170:00764
AATTTTCGTGTATCCTAGGTTACA

>D8PAK:00170:00770
TAAATGATTGTGTCCCAGATTACC

>D8PAK:00170:00777
TTGTAGCCTGGGGCACACTATCGC

>D8PAK:00170:00781
ATTTAGACTGTGTGCCTGATGACA

>D8PAK:00170:00798
TACAAATTTGTACTCTATCATACA

>D8PAK:00171:00776
GCTTGTATGCCAGGACACATTTTC

>D8PAK:00171:00780
TTTAATATTGTACTCCACACCACA

>D8PAK:00173:00759
TACAAATTGTATCCTAACATACCA

>D8PAK:00173:00762
AAGATAGTTCATCCGGCATTACCT

>D8PAK:00173:00776
CTTTGGTATGTAGCGCTGATTACA

>D8PAK:00173:00788
TCACCAACTGTAATTACGCATACA

>D8PAK:00174:00782
GAAAGAAATGTGACCTCACGTACA

>D8PAK:00174:00790
ACTCACATCGTGTGTTAGCATACA

>D8PAK:00174:00798
GGCGCGATTGTCATCCAGCGCACA

>D8PAK:00175:00771
TTGTGACCCTTCTTACAATTCTAC

>D8PAK:00175:00776
GCTGGAATTGTAACCTACAACACT

>D8PAK:00175:00784
GACGGAATTGTAAACTGTGCCACA

>D8PAK:00176:00753
CGAACCTTTGTATTACCAGTCACA

>D8PAK:00176:00778
TTTAGCTACTGAATATGATCTACG

>D8PAK:00176:00793
CTGTAGCGGGGATTACAAATAAAC

>D8PAK:00176:00796
AATAAAACCGTAAGCCAAAATACA

>D8PAK:00177:00760
TTGTAGCCAGGATTACATTCTTTA

>D8PAK:00177:00787
CCTATAATTGTGGCCCAGGTCCCA

>D8PAK:00177:00798
ATAAATAATGTGTCTCACGCTACA

>D8PAK:00178:00765
TTCGCTTTTGTGTCTTGGACTACT

>D8PAK:00178:00794
AGAACGTTTGTAGCCGACAGCACA

>D8PAK:00179:00754
ACTGACTTTGTATCACCAAATACA

>D8PAK:00179:00766
TTGTATTGTATCCCACAATCTGAG

>D8PAK:00179:00777
TTTCACATTGTATTCCGAATCACA

>D8PAK:00179:00789
TGTAGAAACGTATGCCGAAATACA

>D8PAK:00179:00793
ATTTTGATTGTATCTCAAGGCACT

>D8PAK:00180:00762
TAATCAATAGTAGCTTGTCATACA

>D8PAK:00180:00780
ATTTTGTATGCTGGGATACGATTT

>D8PAK:00181:00757
ATACTAAATGTGGTGCCGCATACA

>D8PAK:00181:00786
TTGTGGCCTGCGTCACATTTACAA

>D8PAK:00181:00787
GAGGTAAACGTGGTTCAGCATACA

>D8PAK:00183:00750
TAGCAAACTGTGTTATACGTCACA

>D8PAK:00183:00752
GAACAATTTGTAGCACCCCATACA

>D8PAK:00183:00771
AATGCGACTGTGCCCTCGCCCACT

>D8PAK:00185:00763
TTTTTAACTGTGTCACCCGTCACA

>D8PAK:00186:00757
TGCAATATTGTGTCTTGGGATACT

>D8PAK:00186:00783
TAACTAATTGTATGCAAGAATACG

>D8PAK:00186:00790
ACTGATCCTGTATTCGGTAATACA

>D8PAK:00187:00765
AAATAATATGCATGCTGGATCACA

>D8PAK:00187:00794
TAATCTGTGATGTGGACTACAATC

>D8PAK:00188:00758
TCAACATGTGACCTGGGCTACTAG

>D8PAK:00188:00767
CCCAACGGGTCATCCCGTGCACGG

>D8PAK:00188:00776
TTTTGGAATTGTAATCTGTGGTCA

>D8PAK:00188:00786
GTGGCATTTGTATTCCAAACTACA

>D8PAK:00188:00797
ATGGTAATTGTAGCCTAGGGTCCA

>D8PAK:00188:00799
GGGTATCGCCCATCCATCGCTAGA

>D8PAK:00189:00771
GTAAAGATTGTATGCCGGATTACT

>D8PAK:00189:00779
ATTTGTATCCCATCCCACACTTTA

>D8PAK:00190:00757
CGTTGACCTGTAATCCACGCTACA

>D8PAK:00190:00770
CATTGGACTGTATTGTCCGATACA

>D8PAK:00190:00776
TTTAGGATTGTGCCGCAAATCACA

>D8PAK:00191:00756
AATGGCACTGTGTCCCCGGCTACT

>D8PAK:00191:00778
ATTGCAATTGTGATCCATGTTACT

>D8PAK:00191:00795
ATCTTAAATGTAGGTCAGGCTACA

>D8PAK:00191:00797
TCTTTAATTGTAGTCGCGGCCACT

>D8PAK:00192:00760
ATCAAAAATGTACGCTATCTTACA

>D8PAK:00192:00765
CAAATAGTGTAGCCTGGGATACTT

>D8PAK:00192:00796
CAATTGTATGCCACGCCACTATAG

>D8PAK:00192:00798
TTGTAGTCTGTCTTACTATCGCCG

>D8PAK:00195:00753
TTGTAATGCGGACCACAATTCGAT

>D8PAK:00195:00772
CTGAAATTGTGGGCTGGCTTACTA

>D8PAK:00195:00794
TGTCAAAAAGTAAGCCACACCACA

>D8PAK:00196:00776
AATGAGTTTGTAAGCTGTGTTACT

>D8PAK:00197:00771
CCCAAACTGTGACCTGTGTTACAA

>D8PAK:00197:00797
TTCGAGAAAGTGTCTTGGACTACA

>D8PAK:00197:00799
ACCCAAAATGTTCCCCCGGATACA

>D8PAK:00198:00761
GAACCGATTGTAGCATATAATACT

>D8PAK:00198:00779
TTTTTGAATTGTACTCTACGACAC

>D8PAK:00199:00751
TGCACGTTTGTATGCCACATCACT

>D8PAK:00199:00756
TAATGAATTGTATGCTGTACCACG

>D8PAK:00199:00764
TTCCGGTTTGTAATCTAAAGTACA

>D8PAK:00199:00765
GCTCGAGGTGTGTCCTGGACCACA

>D8PAK:00152:00805
CGTCTGAATGTATCATAGAGCACA

>D8PAK:00152:00837
ATGGAGTTTGTGACTTGAATTACT

>D8PAK:00153:00809
GAACCAACTGTATTCCACCCCACA

>D8PAK:00153:00811
TACAAAGATTGTAATACATAATAC

>D8PAK:00153:00841
TAGTAATTGTAATACAGGCCACGA

>D8PAK:00155:00812
GAAAAGACTGTACTGCAGGTCACA

>D8PAK:00155:00820
CAATAGTTTGTAGCGAGGACCACA

>D8PAK:00156:00813
ACAGAACTTGTACCCCCGGATACA

>D8PAK:00156:00818
TTAGCTAATGTAATCTATAACACA

>D8PAK:00156:00820
CTTGACATTGTACTATGGGTTACA

>D8PAK:00157:00801
TTCTTCATTGTATCATGGATTACA

>D8PAK:00157:00809
TTTAAATGGTAGTCCAAACCACAA

>D8PAK:00157:00821
TCCGCACTTTGTATCACAAATACA

>D8PAK:00157:00848
GCCGAATTGTGAGCTAGATCACAA

>D8PAK:00158:00801
ACACTGATTGTATGCTAGACTCAG

>D8PAK:00158:00813
TTGTGTGCTAGCATACACTTGAAT

>D8PAK:00159:00803
GATCAAAACGTGCCCTAGCTTACA

>D8PAK:00159:00829
ATTTGTAAAACATCCGACATGTCT

>D8PAK:00159:00837
GTAAAGATTGTATGCCGGATTACT

>D8PAK:00160:00848
GTAGAGATTGTGTGACTGGATACA

>D8PAK:00161:00813
CCTCCAAGTGTATGCAAGACTACA

>D8PAK:00161:00820
CACTTAAATGTGTCCCGAAATACA

>D8PAK:00161:00838
TTGTATGGTACGACACATTTTCAC

>D8PAK:00162:00817
ACGTCGTTTGTGGTCCTGAATACA

>D8PAK:00162:00819
CTCGTGATTGTGCCCCCGAATACA

>D8PAK:00162:00838
CTAAAGTGTGCTCTATGCTACTAT

>D8PAK:00162:00846
TTACCTATTGTGACCCATGATACA

>D8PAK:00163:00833
CTTCAGATTGTGTTATGGACTACG

>D8PAK:00163:00840
CTGTATGCCGCGCTACAGTCTTGG

>D8PAK:00164:00828
GTTAGCATTGTGGGCTGGATTACA

>D8PAK:00164:00831
CACGTAACTGTATCCCCTCCTACA

>D8PAK:00164:00846
AATCGAATAGTAACTCTGAATACA

>D8PAK:00165:00800
ATGTTGATTGTAGCATATGATACA

>D8PAK:00165:00816
GATATCTTTGTGCTCTAGAATACA

>D8PAK:00165:00820
TATTATTTTGTATGATGTACTACA

>D8PAK:00165:00837
GTATACTTTGTATTCCCTGCTACA

>D8PAK:00165:00838
CCACGAAAAGTACGCGGGACCACA

>D8PAK:00165:00849
TTTCCTAAAGTAGTCTAGACTACA

>D8PAK:00166:00813
TTGTGTCCTACGCTACAGACCCGG

>D8PAK:00167:00814
TTGTGATCTGCAATACAGTATGAG

>D8PAK:00167:00842
CAGAATTGAGACCCTGGCTACAAT

>D8PAK:00169:00834
AATGGCATTGTGGTGCAGAATACT

>D8PAK:00169:00843
ATCTATATTGTAGTCTATCATACT

>D8PAK:00170:00807
GTTGTGATTGTGGTGTACGACACA

>D8PAK:00171:00822
ACCACGAATGTACGTCAGATTACA

>D8PAK:00171:00846
CAAACTGTGCCGTAGGTTACAATT

>D8PAK:00172:00847
ATTGCAAGTGTGTCGTACACTACA

>D8PAK:00173:00803
TCCCGAATTGTATTATACATTACC

>D8PAK:00174:00809
CTAACTGCACCATCCGTTGCCTAC

>D8PAK:00174:00847
CGAAAAACTGTGGCCTCTCGCACA

>D8PAK:00175:00819
TTGTGGTCCAACATACTTTTATAA

>D8PAK:00175:00828
CTAGGATTTGTGTTCCAGACTACA

>D8PAK:00175:00836
CTCTACATTGTGTCTCCTATTACA

>D8PAK:00176:00809
GGTGAAACTGTGGGGTACGCTACA

>D8PAK:00176:00810
GTTAATTTCGTATCGTAGACTACA

>D8PAK:00176:00823
CAACAAACAGTAGCCGAGCCTACA

>D8PAK:00176:00830
AGCAGGATTGTATTCCACCACACT

>D8PAK:00177:00829
CACTATATTTGTATGTAGCATACT

>D8PAK:00177:00836
TTGTGTTCCAAACTACAATCTCTT

>D8PAK:00177:00847
CTCTACACCGTGTCCTAGCATACA

>D8PAK:00178:00813
TAAAATGTGTATTCTACATTACAA

>D8PAK:00178:00844
GCCTAGCTGCATCCTACACGGTTT

>D8PAK:00179:00812
TTGCACATTGTGAGCGCGACTACA

>D8PAK:00179:00847
ACTTATTCTGTATCCTGTGTCACA

>D8PAK:00180:00841
ATGACGATCGTATCCCCGGTCACT

>D8PAK:00181:00808
TTATCCATTGTATGGCACCATACA

>D8PAK:00181:00813
CTGTATTGTAGCATCCAATCCTGA

>D8PAK:00181:00832
CGCAAATTCGTGTCGTGGGTTACA

>D8PAK:00181:00843
TTCCTATTTGTGGTCTAGATCACT

>D8PAK:00182:00801
AAAAAAAGTGTATTCGTAAGTACA

>D8PAK:00182:00830
AGCACTCATCCGCGTCGCTTAGTT

>D8PAK:00182:00841
CAGAAAATTGAGCTGTGGAATACA

>D8PAK:00183:00842
CCGTTTATTGTAGCGCACATCACA

>D8PAK:00184:00822
TGTGTGATTGTAATCCGTAACACA

>D8PAK:00184:00845
TCCTAAACGGTAACCCACGATACA

>D8PAK:00185:00813
AATTTCGTTGACCCGGCTACAAAC

>D8PAK:00186:00806
ATAAAGTTTGTAATCCCGCATACA

>D8PAK:00187:00847
TTTTTTTACGTAGCGCAAGCTACA

>D8PAK:00189:00807
ACCCAAACTGTATTAGAGGTCACA

>D8PAK:00189:00827
GTCTACTTGTAGCTCCACATCACA

>D8PAK:00190:00813
TAAAATTTTGTATGCAGCGCCACT

>D8PAK:00191:00847
GACACAATAGTATTGTAGCTTACT

>D8PAK:00192:00803
AAGCCAATTGTAACATGTACTACG

>D8PAK:00192:00811
CATAACACTGTACGCTGTCTTACA

>D8PAK:00192:00832
AAACAGATTGTAACCCAATCCACA

>D8PAK:00193:00809
CCACAAATTGTGGGGCCCGTCACA

>D8PAK:00193:00822
GAAATATTGTGCCCTGCACTACTA

>D8PAK:00194:00811
CGTTGAATTGTACTCTAACCCACT

>D8PAK:00194:00820
GCTGTTTTTGTAGCGTCGGCTACA

>D8PAK:00194:00841
TTGTAGCACCGCATACATTAATTT

>D8PAK:00194:00848
ACTCATTGTATCTTGCGATACAAA

>D8PAK:00196:00836
AATGCTTTTGTATTCCGGCATACA

>D8PAK:00196:00846
AGCTTACTTGTGGCTTAGAATACA

>D8PAK:00196:00849
ACAAAAATTGTAGTTAACAATACA

>D8PAK:00197:00831
AGACAATTTGTAAGCTAGCGTACA

>D8PAK:00198:00822
CAGTCGTTTGTATTCTCTGACACA

>D8PAK:00198:00829
TACATAATTGTATGCGGGGATACA

>D8PAK:00198:00844
TCGTGTCGAGGACCACAAAGTCTT

>D8PAK:00199:00812
GGTACGATTGTAACTCAAGCTACT

>D8PAK:00150:00857
AGGGCAATTGTACTGTACAATACC

>D8PAK:00150:00885
TTACGGTTTGTGGGCCCTATTACA

>D8PAK:00150:00888
TGGCCGATTGTAATTTAGAATACT

>D8PAK:00151:00855
GTCCACCGCCCATCCGCGGGCCAT

>D8PAK:00151:00872
AAACTCATTGTGCTCCCTCATACA

>D8PAK:00151:00879
TCCGCATTTGTGGTCTGTACTACA

>D8PAK:00152:00880
TTAAATTGTGTAGTGTGGATTACA

>D8PAK:00152:00890
CTCGTTCGTGCATCCGTATCCATC

>D8PAK:00153:00890
CAGCCAATTGTGATCTGTCGTACT

>D8PAK:00154:00855
AACAAAATTGTATGCAGTAATACA

>D8PAK:00154:00862
CCTGCAATTGTGAGATGTAATACA

>D8PAK:00155:00852
CCCAACTTAGTAGGATGGACTACA

>D8PAK:00155:00887
AACCCGCTTCATCCAGTATTAGGG

>D8PAK:00156:00872
GATTTACTTGTAGCGTGTGCTACA

>D8PAK:00156:00888
TTATCAAGTGTATGCTAGGCTCCA

>D8PAK:00156:00899
TACAAAATTGTAGGCAAGGCTACA

>D8PAK:00157:00892
AACTATGCAGCATCCTTTTAGAAC

>D8PAK:00158:00886
TGCGAACTTGTAGTCCTACATACA

>D8PAK:00158:00899
CTCATCACTGTATTCTGACCTACA

>D8PAK:00159:00853
CGTCTAATTGTACTCCAGACCACT

>D8PAK:00159:00877
AAGATTGTAACATACAATACATTT

>D8PAK:00159:00889
TCCCAAAATGTATTGTACAATACG

>D8PAK:00161:00887
CCCCGATTTGTACTCTAGAATACA

>D8PAK:00162:00850
TTGTAATTCGTAATACAATCAGTA

>D8PAK:00162:00857
TGAATTGTAATGGAGGCCACAATT

>D8PAK:00163:00850
CTGATAATTGTATCCTACTTCACA

>D8PAK:00164:00861
ACCGATTCTGTATGCGACGTTACA

>D8PAK:00164:00862
CAGCGGCTGGCATCCCCTCCTTAC

>D8PAK:00164:00881
TTGTATTGTGGGCTACATTTCTTG

>D8PAK:00164:00895
GTGTCAAACGTATCCCGCGATACA

>D8PAK:00165:00856
AAGCAGAATGTATTCTGACCTACA

>D8PAK:00165:00873
CGTTAAATTGTATCCCAACCCACA

>D8PAK:00166:00854
CCCAGCAATGTGGTCGGGCATACA

>D8PAK:00166:00874
GCATAGTTTGTATTACAGGCCACA

>D8PAK:00166:00875
ATTCGAATTGTATTTCCGAGTACG

>D8PAK:00166:00880
TTGTAATCCTGCATACAAACTGTA

>D8PAK:00166:00881
TTCCTGATTGTAGTCCTTCATACA

>D8PAK:00166:00883
TAGTGCCCTGTATGCTAGGATACA

>D8PAK:00166:00895
CTTAACGTACATCCTTTCTAGTCA

>D8PAK:00167:00860
ACGTGTGTCCCAGAGCACAATTCA

>D8PAK:00167:00886
TGCCAAATGTGGCCTGAGATACAT

>D8PAK:00168:00879
TTGTAGCGTGTATCACACTTGTTC

>D8PAK:00169:00861
TTGATTTGTAAGATAGACTACACT

>D8PAK:00170:00852
CGCTTGTCTCCATCCCTGCATTAT

>D8PAK:00170:00861
ACCCAAACTGTATTCCAGTACACA

>D8PAK:00170:00873
CTAGTTATTGTATGCAGGGTCACA

>D8PAK:00170:00893
AACTCTGTGTGCTAGGCTACAATA

>D8PAK:00172:00850
CGTGTGCTCTCATCCAGCTTTTCT

>D8PAK:00172:00881
CTATGATGTGTGTTCCCGAATACA

>D8PAK:00173:00861
TCGAAAGAGTATTCTACAATACAA

>D8PAK:00175:00857
AATGGAAACGTGTCCTGGCCCACT

>D8PAK:00175:00872
TTGTGTCCTGCGCTACATAAATCG

>D8PAK:00175:00876
GGAAGGAACGTAGTTTAGGATACA

>D8PAK:00175:00880
TATTCCTTTGTAGCCTGCGATACT

>D8PAK:00175:00898
TGTCAAATTTGTGCCGCAGGTTAC

>D8PAK:00176:00851
GCCCAGCTTCATCCGTAGCAATTC

>D8PAK:00176:00878
TCTGAGACCGTAATACAGATTACA

>D8PAK:00176:00885
CCTATGATTGTAGTTTGAGATACA

>D8PAK:00177:00867
TTTCAAATGTATTCCGTACTACAC

>D8PAK:00178:00864
CCGAACTTTGTGCTTCCCAATACA

>D8PAK:00178:00880
CTTGCCATTGTGACCCATGATACA

>D8PAK:00179:00857
GCTAAAGTGTAATCTAGCCTACAT

>D8PAK:00179:00888
TTTTATTGTATGCCAAGCTACACT

>D8PAK:00179:00893
GACCGAACTGTGGCTCAGAACACT

>D8PAK:00180:00868
TGGGACATCGTATGTTGGATTACA

>D8PAK:00181:00856
ACTAGGTTTGTGTCCCCAAATACA

>D8PAK:00182:00876
TTGTATTCTGGATCACTATCTTGC

>D8PAK:00183:00888
ATGTGTTACAGCATACACTTTGTA

>D8PAK:00184:00868
ACTAAGATTGTAGCTTACCACACA

>D8PAK:00184:00876
TATTGAATTGTGTCCGTACTTACA

>D8PAK:00185:00865
CATTCCTTTGTAAGCCAGATTACA

>D8PAK:00186:00860
TGCATAAAATGTATGCCGGACCAC

>D8PAK:00187:00868
CTTGACATTGTACTATGGGTTACA

>D8PAK:00188:00851
TTTCGAATTGTAGGCCACAATAAC

>D8PAK:00188:00855
ATCATCTTTGTATCCTGGAGTACG

>D8PAK:00188:00868
ATCGTAATTGTAATCTCAAACACA

>D8PAK:00188:00874
AAAATTTTTGTCGTATATCATACA

>D8PAK:00188:00882
ATTGTAATTGTAATCCCGGCTACT

>D8PAK:00189:00851
TCCGGAAATGTACCCTGTACTACA

>D8PAK:00189:00870
TTCAACTGTATTGTGGGACACATT

>D8PAK:00189:00874
TCCTCGATTGTATCTTGGAGTACA

>D8PAK:00189:00878
TAAACAATTGTGACGGAGACCACT

>D8PAK:00189:00879
CCTGATTGTGTATCGTGGGATACA

>D8PAK:00189:00881
ACCCAGATTGTATCCCCGATTACT

>D8PAK:00190:00863
CCCAAAATGTATGCTGCAATACTT

>D8PAK:00190:00892
ATCCCTATTGTATGATAGCATACA

>D8PAK:00191:00879
CAAGTCCGGCCATCCATCCTATCC

>D8PAK:00191:00895
TTCCAATTGTATTTCACACTACAA

>D8PAK:00192:00866
TACTGTTTCGTATCCTGGCCCACA

>D8PAK:00192:00867
CACCAACATGTATTCCACGATACA

>D8PAK:00192:00896
TAATTAATAGTAGTCTAGACTACC

>D8PAK:00193:00868
TTGTACCCGAGCATACAGTCGGTA

>D8PAK:00193:00889
CTTTGCTTTGTGATCCACACCACT

>D8PAK:00193:00899
GGATTTTTTGTATGTTAGATCACA

>D8PAK:00194:00866
TCAAAGATTGTATTGTGCCATACA

>D8PAK:00194:00867
CTGTCTTTGTATCCTAGCTTACAC

>D8PAK:00194:00871
TCAGAATTTGTATCGCGTGTTACA

>D8PAK:00194:00875
AAAATCATAGCCTGGCATACAATC

>D8PAK:00194:00878
TCTTAATTAGTATTGCACATTACA

>D8PAK:00195:00894
TTCTAATTGTGGCGCTTAATACAT

>D8PAK:00196:00855
CACATGATTGTGCCCCCGGATACA

>D8PAK:00196:00863
TCACAAAACGTGGGCTGGAGCACA

>D8PAK:00196:00871
ATCCAGATTATAGTGGGGGTTACA

>D8PAK:00196:00877
TATCAAATTGTAAGATATAACACA

>D8PAK:00196:00899
TATCAAATAGTACTCTACAACACA

>D8PAK:00197:00866
CCAGTATTGTATGCCCCGATACAA

>D8PAK:00197:00885
TGTTCAATTGTGAACTATGACACA

>D8PAK:00198:00862
TCAGAAAATGTACTCCTGGACACA

>D8PAK:00198:00870
GACGTTTCTGTAGTATAGAATACA

>D8PAK:00198:00879
GGACGAACTGTATCTGGCACTACA

>D8PAK:00199:00879
TAGTAGCCTGAGATCACAATTCTA

>D8PAK:00199:00887
CATGTGAATGTAAGCAGGAATACA

>D8PAK:00199:00888
GATTATTCTGTAACCTACAGTACA

>D8PAK:00199:00898
ATAAAACCCGTATGCCCGGATACA

>D8PAK:00150:00937
GTGCGAATTGTAGTTCAAGTCACT

>D8PAK:00151:00928
AATTATTTGTATTCTTGCATACAA

>D8PAK:00151:00944
CGTTAGATTGTGCCGCAGGCTACT

>D8PAK:00151:00948
TGATTGTGCTCTAGACTACATTCA

>D8PAK:00152:00924
CAATTTTGTAGCCCGCGCCACACT

>D8PAK:00153:00900
TCTTGAATTGTCACGTAGATCACA

>D8PAK:00153:00910
CTGGGTACTGTATCCTGTCATACA

>D8PAK:00153:00912
TTGTATCCCTGGATACATTTACGA

>D8PAK:00153:00913
GTTGTAAATGTAGGCTGGATCACA

>D8PAK:00153:00949
CTTCACCCTGTAACCTACGCCACA

>D8PAK:00154:00910
GGCAGCATTGTGGTTTGCGCTACA

>D8PAK:00154:00919
TAAATGTATCGTAGGATACAATTA

>D8PAK:00155:00940
TTGACAATTGTAGTCTCGACCACT

>D8PAK:00156:00900
TAGAAGATTGTAATGACGGTGACA

>D8PAK:00156:00904
CCCATACCTGTATTACAGGTCACA

>D8PAK:00156:00910
CGATCAACTGTATGCCACGTCACG

>D8PAK:00156:00935
CATCTCATTGTGTTCTGTCATACA

>D8PAK:00157:00914
CATTGAATTGTATTCTGGACGTAA

>D8PAK:00158:00919
ATATACATTGTATCCGACACTACG

>D8PAK:00158:00928
CCCAATTGTAACGTAGCCTACTTT

>D8PAK:00159:00901
AATAAGACTGTGTGCTATGCTACC

>D8PAK:00159:00930
AGACAAATTGTGGCATAGCGTACT

>D8PAK:00159:00941
TTGTATTCCGTAATACGATTTCGG

>D8PAK:00160:00923
TTGTACGCTGGGCTACATTTCTGG

>D8PAK:00160:00929
TTTGCGAATGTATCGTGTACCACA

>D8PAK:00160:00934
AAACAGTTTGTGTTGTAGACTACA

>D8PAK:00160:00935
ACTTGAAATGTAATGCATCTTACA

>D8PAK:00160:00937
AAATTCTAACATCCGCCTATTCAC

>D8PAK:00161:00903
TTTAATTCTGTATTCCAAGTTACT

>D8PAK:00161:00932
GGAAAGTTTGTATTATGAGGCACA

>D8PAK:00162:00901
TTCAAGTCTGTAGTCTCGGTTACA

>D8PAK:00162:00924
CTTAAATTTGTATCCCTGCCTACA

>D8PAK:00162:00935
ACCCTGAATGTGGCCTAACCTACA

>D8PAK:00164:00919
CCTAATCCTGTAGTGCAGCCTACA

>D8PAK:00164:00924
GGTCTCTGTATCCTAGCTTACAAT

>D8PAK:00164:00933
CATCAACTGTAGCCGGCGCTACAA

>D8PAK:00164:00940
TATGCGAATGTGTCATATCATACA

>D8PAK:00164:00941
TTTGGGTTTGTGGTGCGCCATACA

>D8PAK:00164:00942
CTTTCGATTGTATTTCGGAACACA

>D8PAK:00164:00944
TGCTTTTATGTATCGTGCGCTACA

>D8PAK:00165:00921
CTAAATTTTGTATCCCAGGCTACG

>D8PAK:00166:00901
ATGCAGTCTGTAGTCCTGGTTACA

>D8PAK:00166:00911
CGATTGTAAGCAGGACTACATTCG

>D8PAK:00166:00914
GTTTAATTGTATTCCAGAATACGC

>D8PAK:00167:00902
GTCTGGCTCCATCCGGAATCGCCG

>D8PAK:00168:00900
TTTTAGTTTGTAACCGTGCATACA

>D8PAK:00169:00904
CATTCGATTGTATCCTGTAATACT

>D8PAK:00169:00916
AAGTATTCTAGACTACAAAAAGCG

>D8PAK:00169:00927
CGTAAATGTATGAGAGGCTACAAT

>D8PAK:00169:00931
TATCCATCTGTGACCTAGCACACA

>D8PAK:00170:00914
CGCGACTGTGATCCAAGTCACATA

>D8PAK:00170:00920
CCCTAAACGTATCCTAGCTTACAA

>D8PAK:00170:00930
GCATAGATAGTAGTCCAGAACACA

>D8PAK:00170:00938
GTCCATACTGTATCCCCCGTCACA

>D8PAK:00170:00948
TAAAATGTATGCTAGATCACATTG

>D8PAK:00171:00908
CAACCGTTTGTATCGTGTCTTACA

>D8PAK:00171:00920
ATTGTATTCCTGGCTACATTCTTT

>D8PAK:00171:00936
AATCCTATTGTAACGCTGAATACA

>D8PAK:00171:00943
TACCCTTTGTAACCTGTCATACAA

>D8PAK:00172:00903
AAAAAAAAATGTATGTCCGCGTAC

>D8PAK:00172:00904
TCAGACTGTGCCCTATGATACATT

>D8PAK:00172:00910
CCGGTATTATCATCCTAACACCAA

>D8PAK:00172:00941
AGTATGCATCCTATTCCCTGTCCT

>D8PAK:00173:00902
AGTTCAATTGTATTCGGAGTCACT

>D8PAK:00173:00922
AACGTAAATGTAATCCAGCGTACA

>D8PAK:00174:00916
TTTGAGATTGTATCACGAGCTACG

>D8PAK:00174:00921
ATTAAATGTGTCACCCGCTACAGT

>D8PAK:00174:00923
TCGCATAGGACATCCCACTATGTA

>D8PAK:00174:00931
TGTCCATTTGTAAGCTGTAATACT

>D8PAK:00174:00944
AATCATACTGTATCCTACGGTACA

>D8PAK:00176:00916
TCTAAAAAAGTAGTCGATACTACA

>D8PAK:00176:00943
AGACAGATTGTGCTTGGCATTACA

>D8PAK:00176:00944
TGCTTACTTGTATTATAGGATACA

>D8PAK:00177:00905
ACCGTTTCATCATCCAGTTTTAGA

>D8PAK:00177:00918
TCAGACTTTGTATTCCACCATACG

>D8PAK:00177:00942
TTCAGAAATGTGTGCGGTCATACA

>D8PAK:00178:00903
TCAAACAATGTACTCCACATTACA

>D8PAK:00179:00904
TGATTGTGCCCTAACATACATTCA

>D8PAK:00179:00906
TCTGTGATTGTAACCTCTGCTACA

>D8PAK:00179:00917
CTTCAAATTGTATCCTGGACCCCA

>D8PAK:00179:00926
TTGTATGCTAGGATACGTATCCGA

>D8PAK:00179:00929
GATTTAATTGAATGCTACCATACA

>D8PAK:00179:00939
TGTTAAATCGTATTCTGGGCTGCA

>D8PAK:00180:00912
ATATACATAGTAGTCTAGATTACT

>D8PAK:00180:00913
GTGCAAATAGTGTTCCTTATTACA

>D8PAK:00180:00918
TTGTATTGTGGGCTACAATATGAA

>D8PAK:00180:00923
CGCAAACCTGTAGTCTGCGCCACA

>D8PAK:00180:00937
CTAGCTATTGTGTTCTAGCATACA

>D8PAK:00181:00904
CTCCTGACTGTAGTCTGTGCTACT

>D8PAK:00181:00916
TTGTGGCGCCCAATACAATTTTAT

>D8PAK:00181:00928
ATGATCATTGTAGTCCTTCATACA

>D8PAK:00183:00942
TTTAACTTTGTATCCGGTGTTACA

>D8PAK:00185:00911
CTTTAGATTGTATCTAGGATCACA

>D8PAK:00186:00949
AAATGGAATGTATCGTTGGCTACA

>D8PAK:00187:00906
TGCAGAATAGTATCCTGGGTTACA

>D8PAK:00187:00907
CCAGTTTTCCCATCCTTGCCATAC

>D8PAK:00187:00914
GTTATACCTGTAGGTTGGAATACA

>D8PAK:00188:00949
CCTAATTGTAGCCCACCATACCAA

>D8PAK:00189:00949
TTGTGGCCCAAGCCACAGTTTACA

>D8PAK:00190:00920
AAAACAATTGTAGTGTGGATCACC

>D8PAK:00190:00936
TTGTAGCTCTCAATACAATGTGTA

>D8PAK:00190:00945
CATTACACTGTATTGCGTAATACA

>D8PAK:00190:00946
AACACGTTTGTATCCGGTGTTACT

>D8PAK:00191:00903
AAGTAAGACGTAGCCCATGCTACT

>D8PAK:00191:00920
ATGGCGATTGTATGCTGCAATGCA

>D8PAK:00191:00940
TGAAGATTGTAATCCTGGATACTT

>D8PAK:00192:00910
AACAAACCTGTGGCCTAAACCACA

>D8PAK:00192:00916
ACAACGATTGTAGGCTGTGCCACA

>D8PAK:00192:00935
AACGCGAATGTGTCCTAAACTACT

>D8PAK:00193:00920
TGGATTACTGTAGTTCAGGCCACA

>D8PAK:00193:00933
CTTTACATTGTATGCTAGATCACT

>D8PAK:00193:00947
TTGTAGCCTGTGATACATTTAGAT

>D8PAK:00195:00902
TTTAAGTTTGTATCTGAACCTACA

>D8PAK:00196:00937
GTGTATTCTGGAGCACACTCTTAT

>D8PAK:00196:00944
CGACGCAGCGTATCCTAGCATACA

>D8PAK:00198:00936
TTGTATCCTAACCTACAAATACAC

>D8PAK:00198:00937
TGCACTATTGTATTACGGGACACG

>D8PAK:00198:00945
AACGCGATTGTATGCTGTGATACT

>D8PAK:00199:00911
AATTTACCTGTAGTCTAAAACACA

>D8PAK:00151:00952
AGGCCAACTGTAGCTGGTATTACA

>D8PAK:00151:00956
AAGTTCTGTGACCCGGGCTACAAA

>D8PAK:00151:00983
CAAATTATTGTGTCCCCGCTCACA

>D8PAK:00152:00959
GTTCTAATTGTCACCTGCATTACA

>D8PAK:00154:00978
AAAGGTAAAGTATGGTACACTACA

>D8PAK:00155:00959
AAGTCTTTTGTATCCGGGATCACA

>D8PAK:00155:00968
GTTAGGACTGTGACGTAAACTACT

>D8PAK:00155:00983
ACCTTCGGCCATCCGCGCTCTTGA

>D8PAK:00156:00950
AGTCAGATTGTGTCCTACTGTACA

>D8PAK:00156:00955
TTCCAAAATGTATCATACGGCACT

>D8PAK:00156:00956
TTTGTCTTTGTGGCGAGGCGTACA

>D8PAK:00156:00960
AACAATTGTGACGAGGCATACATA

>D8PAK:00156:00980
GTCTTCACTTCATCCTGCCTAACC

>D8PAK:00156:00983
TACAACTTTGTAGTGTGACACACA

>D8PAK:00156:00996
AGTTAGATTGTATTCTAAGGTACG

>D8PAK:00157:00952
CCAGAGATTGTAGTTTCCGATACA

>D8PAK:00157:00972
ATATACTATGTGTCCTGAGCCACA

>D8PAK:00158:00950
CAATCATTGTACTCTGAGCTACAG

>D8PAK:00158:00954
AAGAGTTTGTATCGTACGTCACAA

>D8PAK:00158:00964
CCGCATTTCTCATCCCCCTGAAGA

>D8PAK:00158:00970
TGGGACATTGTATGTTGGATTACA

>D8PAK:00158:00977
CACTACTTCGTACGCTATACCACA

>D8PAK:00158:00987
GATCCGTCTGTAGCCTACCATACA

>D8PAK:00159:00970
CCCAAAATTGTGACTCGGCGTACA

>D8PAK:00159:00993
CCTTAAACTGTATCGAGGAACACA

>D8PAK:00160:00962
ATCGGAATAGTAATATGGGACACA

>D8PAK:00160:00966
AACGAGATTGTAAGCTTGTACACA

>D8PAK:00161:00958
TTGTGGGACAGGGCACATTTATCG

>D8PAK:00161:00998
ATTAACATTGTAAGCCACGACACA

>D8PAK:00162:00950
TTAGCCAATGTATTGCAGACTACA

>D8PAK:00162:00975
TCTCAAGTGTATGCTGTGGCACAA

>D8PAK:00162:00991
TTGTACCGTGGCTTACATTTTGTT

>D8PAK:00163:00950
AACCGTTTTGTATGCGTGCTTACT

>D8PAK:00163:00955
GACGTTAATGTGGCCTGGCTTACA

>D8PAK:00163:00965
AAATTGTATTTGAGACTACATGTT

>D8PAK:00164:00956
GCAAAAATTGTATGCTGCGTTACT

>D8PAK:00164:00962
TCGTCAAATGTATCGTGTCTCACA

>D8PAK:00165:00958
TTGATCTTTGTATTCTGGCCCACA

>D8PAK:00165:00961
TCCAGCCTGCCATCCTGAGACATA

>D8PAK:00165:00973
AAACGGATTGTAATCTAATACACT

>D8PAK:00165:00983
GGTATTAATGTATCGTAGCCCACT

>D8PAK:00166:00974
CTCCCGTTTGTGGCCTAAGTCACT

>D8PAK:00166:00977
TTGTAGCCTGCGGCACTATATGAT

>D8PAK:00167:00982
CACCCATTTGTGACTTACGATACA

>D8PAK:00170:00956
TCTGAGTTTGTGTTCTGCGATACA

>D8PAK:00170:00962
TAAACTTTGTGTTCTACACTACAT

>D8PAK:00170:00972
TCGAATACGTCATCCGTTCGTAAA

>D8PAK:00171:00959
ATAATTGTATTGCAAGTCACATTC

>D8PAK:00171:00998
AAACGACTTGTAACCTACGTTACA

>D8PAK:00172:00984
CCACGAATTGTATCCCTTGCCACA

>D8PAK:00172:00997
ATTGTATCGCAGACTACATTCCTC

>D8PAK:00173:00964
GTTAAGATTGGACTACAGGTTACA

>D8PAK:00173:00974
CAAGTGGAGGCATCCGTGTTTTCG

>D8PAK:00173:00989
GTGAACATTGTATCTCCCACCACA

>D8PAK:00173:00998
CTCAGGCGCTCATCCGGCATGAAC

>D8PAK:00174:00954
AAATTGTGTCAGAAAATACAATTC

>D8PAK:00174:00961
CCTAAACTGACATCCAGTAACAGC

>D8PAK:00174:00967
GACGCAAACGTATGCTGGACTACT

>D8PAK:00174:00975
GCGTCGATTGTACTTTACAATACA

>D8PAK:00174:00988
TTGTAATCCAAGGCACAGTCTTGC

>D8PAK:00174:00992
ATTTTTATTGTATGCGGGGCCACT

>D8PAK:00175:00951
AACAATTCTGTGCCCAGGAATACA

>D8PAK:00175:00991
CGTCTGATTGTATCATCAGCTACA

>D8PAK:00176:00966
GCGGAAACTGTGGCCCATGACACA

>D8PAK:00176:00981
TTCTAGATAGTATCCTAGACTACA

>D8PAK:00177:00962
GCGGAGATAGTATCCCGAAACACA

>D8PAK:00177:00987
CGGCAACCTGTAATCTAGAGCACA

>D8PAK:00178:00968
TTGTAGTCTGCCCTACAGATGGTC

>D8PAK:00179:00963
GTGTGGCCCCTCATACAATCTTAA

>D8PAK:00179:00989
ATAGGATTTGTGGTTTGGACCACA

>D8PAK:00179:00997
CATCGTTTTGTGTCCTGAGTCACA

>D8PAK:00180:00964
TATTTTTGTGCCCCAGATTACAAT

>D8PAK:00180:00969
GGTTCCATTGTATTCCAAGTTACT

>D8PAK:00180:00978
TTTTAGACTGTGTTCCGTAATACC

>D8PAK:00180:00980
CTTTGATTGTACGCCCGAATACAA

>D8PAK:00180:00984
GATTTCTTCGTAGCCGTGCTTACA

>D8PAK:00180:00988
CTGGTAATTGTATTGTAAACTACT

>D8PAK:00181:00975
AATTTTGTAGTCCAGCACACATTT

>D8PAK:00182:00977
GATTGAAATGTATTGCTAGTTACA

>D8PAK:00182:00984
ATGTAGCATGGAGTACACTTTGTC

>D8PAK:00182:00986
ATGTGACCTACACCACAGTTCGTA

>D8PAK:00182:00999
TCACAAATTGTAAGCTACGTCACA

>D8PAK:00183:00951
GAGAAATTTGTAACATGAGTTACA

>D8PAK:00183:00968
TATCGAAATGTATGCCCAATCACA

>D8PAK:00183:00971
AGTCCAATGGTATGCTACGCTACA

>D8PAK:00183:00979
AAAGACTTTGTAAGGCACGATACA

>D8PAK:00184:00951
CGAACTATGTGACCTGGCATACGA

>D8PAK:00184:00986
AATAATATTGTATGTTACACCACA

>D8PAK:00184:00997
ACTACTTTTGTATCCCCCCATACA

>D8PAK:00185:00954
CACTGGATTGTAACCTAGATTACT

>D8PAK:00185:00967
GCCTATTCTGTATGCTGAATTACA

>D8PAK:00185:00986
TTGTAACCTAGGCAACAATTGCTA

>D8PAK:00185:00998
AAAAAATTTGTGTCCTCCACTACG

>D8PAK:00186:00957
GCGTGAAATGTGTTTTGCGCTACA

>D8PAK:00186:00967
TTTTGTTTGTGTTCTACGATACAT

>D8PAK:00186:00969
GGCGTAAATGTGTCCTGCATTACG

>D8PAK:00186:00982
GAGACAATTGTGATCCATGACACA

>D8PAK:00186:00992
GATTACATTGTATTATGTGCTACA

>D8PAK:00187:00971
TTTCGATTTGTGACTCAAATTACA

>D8PAK:00187:00995
AAATCAAATGTATCGTCCGTTACA

>D8PAK:00188:00972
CACGAAACTGTGTCGCATCTTACA

>D8PAK:00189:00953
ACGCCAAGTGTGGCATGCGCTACA

>D8PAK:00189:00988
TTCGTACAATCATCCGGCACTACT

>D8PAK:00190:00964
AAAGTAATTGTATTCTAACTCACA

>D8PAK:00190:00969
ATGTATACCTAGAATACACTTTAA

>D8PAK:00190:00974
ATGTAATCTGGCCTACATATTGAG

>D8PAK:00191:00988
TTGTAGCGTGGAATCCAATCTTAC

>D8PAK:00192:00975
CTTAAATCTGTATGCCTCGCTACA

>D8PAK:00193:00981
CTTTAGATTGTATTAACCGACACA

>D8PAK:00194:00969
TCAGTCTTAGTAAGCCAGCATACA

>D8PAK:00196:00981
AAGTGTATTCCTGCATACAGTGCG

>D8PAK:00196:00982
CACTGATTTGTAGTTAGGGTTACA

>D8PAK:00197:00980
GCAGTCATTGTAGTACAGTGCACA

>D8PAK:00198:00962
TTAGAAACGTGATCCAGAATACAT

>D8PAK:00199:00968
ACCGGATTGTAGCTTATGTTACAA

>D8PAK:00153:01008
TTGTATCCTGGGTCACTTTCAAGT

>D8PAK:00156:01009
TCCGGTTTTGTACTCCGGCTTACA

>D8PAK:00156:01013
ATGTATCACTCATTACAATTGAAA

>D8PAK:00157:01022
AGCTCGATTGTAGTGCGGGTTACA

>D8PAK:00157:01026
GACCACATTGTAACCTGTGCTACT

>D8PAK:00158:01016
CACAGAATGGTGCCCTACACTACA

>D8PAK:00158:01020
AGCGAGATTGTGCTCCCAGATGCA

>D8PAK:00161:01009
CGATCCATTGTGGTCAGGGCCACA

>D8PAK:00162:01026
TATCAGATTGTATCGCCAACTACG

>D8PAK:00163:01022
GTACTCACGCATCCTAGCAGCCTA

>D8PAK:00163:01028
GCATCAATCGTATTCCCCACCACA

>D8PAK:00166:01009
ACCTTTAAAGTGACCTACGCCACA

>D8PAK:00166:01023
GCAGCGATCGTATTCTGGAATACT

>D8PAK:00167:01006
CGAAATTGTGGTCCCCATCACAGG

>D8PAK:00167:01012
ATATCGAACGTGACCCGGAATACA

>D8PAK:00167:01028
CTACGGTCCTCATCCTAATCATCA

>D8PAK:00167:01029
CACGACACCGTAGTCTGGACTACA

>D8PAK:00168:01006
GACTTGATTGTGATCCCTACTACA

>D8PAK:00168:01020
GCTATTGTAGCCTGTGATACTTTC

>D8PAK:00169:01024
GCTAAAATTGTATCGCTTAATACA

>D8PAK:00170:01006
CCTTTGATTGTGTTCTAGTTCACA

>D8PAK:00170:01019
CGTCACTTTGTATGCCATCCTACA

>D8PAK:00170:01026
TTGTTTTGTAAGGCAGAATACAAA

>D8PAK:00170:01029
TTTGTAATTGTGAGCCAGGTTACA

>D8PAK:00171:01030
TTGTAGGCTACAATACATTTCTTC

>D8PAK:00171:01040
CCCGGAACTGTGATCCTCGTTACA

>D8PAK:00172:01019
AATTTGTAGCCTAGGTTACGGTTT

>D8PAK:00172:01028
TTTTGGATTGTACTGCAGCATACA

>D8PAK:00173:01032
CACGAAATTGTAGGCTAAGCTACC

>D8PAK:00173:01035
ACTGTAATTGTATGATCGATCACA

>D8PAK:00174:01024
AAGAACTTTGTGATTTGCATTACA

>D8PAK:00174:01039
TTGTAGCCTAGGTCACAATTATCA

>D8PAK:00175:01020
AGCCGTGTCCATCCTACCATACTT

>D8PAK:00177:01008
ACTATCTTCGTATCCCTGACTACA

>D8PAK:00177:01041
TACCCAATTGTGACCCCTAATACA

>D8PAK:00178:01021
TTGAACACTGTGCTCCGGCATACA

>D8PAK:00178:01022
TATACAATTGTATTTCCCGTTACA

>D8PAK:00178:01032
AATTTATCTGTGGCCCCGACCACA

>D8PAK:00178:01033
TCATCTCTCCCATCCGGGTTTCCA

>D8PAK:00178:01044
CTTCTGATTGTGGCGTATCCCACA

>D8PAK:00179:01002
ATCGGAATAGTAATATGGGACACA

>D8PAK:00179:01026
TAGCTACCATCATCCAATTACTGG

>D8PAK:00179:01031
AGAACTTTTGTATGCCATAATACT

>D8PAK:00179:01034
ATTTGAATTGTGCCCCGGCCCACA

>D8PAK:00180:01027
AGATGCTTCGTATTACAGAATACC

>D8PAK:00181:01002
TAGTGGCCCAGAACACAATGCCAT

>D8PAK:00181:01009
GTTACGATTGTGGTCCTGCATACT

>D8PAK:00182:01022
AGACGCAATTGTAGTCCAGGCCAC

>D8PAK:00182:01024
AGTCATATTGTATTCATGGCTACA

>D8PAK:00182:01025
AAACCAGTTGTAGTCTAGCATACA

>D8PAK:00183:01049
AGTTACACAGTAGGCCGCGATACA

>D8PAK:00184:01019
ACTTCAACTGTGCCGTGACATACA

>D8PAK:00184:01029
GATAAAACTGTGTCCGAAGATACT

>D8PAK:00184:01036
ACCACGAATGTAAGTCAGATTACA

>D8PAK:00184:01047
GATTGAAATGTGTCTTCGGTTACA

>D8PAK:00184:01049
TTTTGGACTGTATGCCTAACTACA

>D8PAK:00185:01015
CTATTTTTTGTAGGCTGCGCCACT

>D8PAK:00185:01017
CACTCGACTGTGAGCTAGGCTACA

>D8PAK:00185:01022
AATTAAATTGTGACGCGTACCACA

>D8PAK:00186:01007
ATTAAAATTGTATTGAGGATCACT

>D8PAK:00186:01019
AAAATGTATTCTTCAATACAATTC

>D8PAK:00186:01022
CGGATAATTGTAAGCCAAGATACA

>D8PAK:00186:01026
CCGCGTCCTGTATGATAGATCACA

>D8PAK:00187:01042
CACCCTAATGTATCCTAAGACACA

>D8PAK:00188:01015
CATTGAAATGTGTGCTAAACTACA

>D8PAK:00188:01035
GCCTTATGTGTATCCCCGGTTACA

>D8PAK:00188:01041
GTACTTTGTACTCGGGGCTACACT

>D8PAK:00189:01002
ATACTAATTGTAGTATACGCCACT

>D8PAK:00189:01004
CTTAACACTGTGGCTCAGCCCACT

>D8PAK:00189:01013
TAGCCATTGTATGCGCAACTACAA

>D8PAK:00189:01020
AAAAATAGTGTAATGTGTAACACA

>D8PAK:00189:01029
ATGTAACCTGGGACACAATTTCCT

>D8PAK:00189:01035
GGTCAGAATGTAACCCTGGGTACA

>D8PAK:00190:01021
AACACAATTGTAGTCTCTGATACA

>D8PAK:00192:01039
GTCAAAACTGTGACCTCTGTTACA

>D8PAK:00192:01043
GCTCAATATGTATCACACAATACA

>D8PAK:00194:01014
TTTTAATTGTAGTCCCGGTTACTA

>D8PAK:00194:01022
CGTTAGATTGTATGCCATAACACG

>D8PAK:00195:01020
ATGAAGTCTGTATTCAGCGTTACA

>D8PAK:00195:01049
TTTGGAATTGTACGCTGCGCCACT

>D8PAK:00196:01006
ACGGCAATCTCATCCACGTTCATA

>D8PAK:00196:01019
AAAAAAACTGTGCGCGGGAACACA

>D8PAK:00196:01028
ATGTGGCGTGTAATACAATCGTGG

>D8PAK:00196:01045
ATGTATCCCGTGATACAATTCCTT

>D8PAK:00198:01006
TACGGCACTGTGACCTGGCCTACA

>D8PAK:00198:01009
AATAAAAAAGTATCCTACACTACC

>D8PAK:00198:01049
AACAATGTGCCCTGGCATACACAT

>D8PAK:00182:01051
GAATAGATTGTGCTCCGCGCTACT

>D8PAK:00183:01059
ACATTCTAAGTAGCGTAGCATACA

>D8PAK:00185:01057
CGTCGGTGGCCATCCTGCATATTT

>D8PAK:00186:01057
GTGACTTTGTAAGCCAGATTACAC

>D8PAK:00187:01054
TAGGCGATTGTATCGTTGAATACA

>D8PAK:00187:01058
CTACCGATTGTGAGCCCGGTTACA

>D8PAK:00188:01052
TAGTGTATTGCAGACCACAGTTTT

>D8PAK:00188:01056
TTGAAATTGTAGTCCGAAATACAG

>D8PAK:00189:01058
GATAAATATGTATCGTGGGCTACA

>D8PAK:00190:01054
TTGTATGCCACAATACGTTTGTTG

>D8PAK:00191:01062
TGTTGAATTGTAAGCCAGGCATAT

>D8PAK:00192:01051
AACACGATTGTATTCCAAGTTACT

>D8PAK:00194:01061
TTGTATTCTGTGACACTATTTATT

>D8PAK:00195:01056
AGAACAATTGTAACCCAGCCCCCA

>D8PAK:00195:01068
CCGGAGCTCACATCCCTAATTTCT

>D8PAK:00196:01050
CGTCCCATTGTATCCGATCCTACA

>D8PAK:00196:01052
TCTAAATTTGTATTTCTAGTTACA

>D8PAK:00197:01053
TCGGAGATAGCATGCTGGCATACA

>D8PAK:00197:01060
CATAAAATTGTATGCAAGACGACA

>D8PAK:00197:01065
TAAATAAATGTATCCGGGAGTACT

>D8PAK:00198:01064
GAGTAATTGTATTGCGAGGTACAA

>D8PAK:00199:01062
ACCCCGCATCCACACTAGGAGACT

>D8PAK:00199:01072
CAGACTGTAGTCTGCGCTACCTTT

>D8PAK:00200:00005
TAAAGGACTGTGTCCTGCAGTACA

>D8PAK:00200:00036
TAGTAAGCTGGCTTACAATTCGCG

>D8PAK:00201:00027
TAGTAGCCCGGGATACATTCTGGG

>D8PAK:00201:00031
TCGTACTCCAGAACACAATCTTAT

>D8PAK:00201:00048
ATATACTTTGTACGCTCTACTACA

>D8PAK:00202:00019
ATCATTTGTAACACCAGCTACATT

>D8PAK:00202:00032
GAGAGAAATGTAGTGCTGGTCACA

>D8PAK:00203:00023
CACGACTTGTATTCCGCAATACAT

>D8PAK:00203:00033
CAGCAGATTGTATGCTGTGCTACA

>D8PAK:00204:00013
AGTCATTTTGTATCCCAGGCTACG

>D8PAK:00204:00026
CTGCCATTTGTGGCCCTGGTTACA

>D8PAK:00204:00037
ATGTATGTTAGATTACAATTGATA

>D8PAK:00205:00015
TAATTTTTTGTGACTCTAGTCACT

>D8PAK:00205:00016
AAGTAAAGTGTGATGTAGAGTACT

>D8PAK:00205:00022
AACCTCATTGTATTAGGGGCTACA

>D8PAK:00206:00023
AGCTCCACTGTAACATAGATTACA

>D8PAK:00206:00028
ATTGAAATGTGTTCTATGCTACAA

>D8PAK:00207:00006
ACAATCTTTGTATGCTATCTTACA

>D8PAK:00207:00010
TCAAAACTGTGTCCGAGGCTACAC

>D8PAK:00208:00022
TTTTAGTTTGTAGCGCTGAATACA

>D8PAK:00208:00041
TTGTGGCCTGCGCTACAGACGTGT

>D8PAK:00208:00048
GCTACGTTTGTGACGTAGGCTACT

>D8PAK:00209:00009
TAAGACATTGTGCTTCAGCATACG

>D8PAK:00209:00048
ACAAACATTGTGCTCCATACTACA

>D8PAK:00212:00019
AATAAACCTGTGCCCTGCGTTACA

>D8PAK:00212:00032
AGACAATTTGTATTCCTACATACG

>D8PAK:00212:00042
GGCAGGATTGTCATCCAGGGCACG

>D8PAK:00213:00025
CAGGGTCGGTCATCCGTGAGCTGT

>D8PAK:00214:00022
AGCCAATGTTATTCAACTGTTACA

>D8PAK:00214:00024
AAATGTGTATTCCGGCTTACAAAC

>D8PAK:00214:00034
TCGAATACTGTAGCCAAGAATACA

>D8PAK:00215:00013
CTTTACACTGTAGCCCATATTACA

>D8PAK:00215:00023
TCATCTTTGTATGCTGGCCTACAT

>D8PAK:00215:00033
TTGTATGCCCGATCACAATTTGTG

>D8PAK:00216:00020
GTCCAAACGTAGTCTAGAGTACAG

>D8PAK:00216:00025
GTTGCGTTTGTATTTCAGGCTACA

>D8PAK:00216:00038
GTCAACTTTGTAACCAGAGCTACA

>D8PAK:00217:00044
ATGTAGGCTAGCATACATTCATTG

>D8PAK:00218:00004
TTGTAGTTCGCCTTACAATCTGTG

>D8PAK:00218:00007
AACCTAAACGTATGCCAATACACA

>D8PAK:00218:00028
GAACAATTTGTAGCACCCCATACA

>D8PAK:00218:00033
CACCAAACATGCATCCTGCGCTCA

>D8PAK:00218:00042
GCAACATTGTATTGTACCATACAC

>D8PAK:00220:00017
CGTAGGATTGTGTCTCGGAATACT

>D8PAK:00221:00040
TGTTGAAATGTGACTTAGCTTACT

>D8PAK:00222:00025
AATTAGATCGTAATCTATAATACG

>D8PAK:00222:00028
ACACCATATGTGACCCCGGATACG

>D8PAK:00222:00029
TCAAAACTTGTAGTGTAGCATACA

>D8PAK:00223:00006
AACTAGCCTCATCCGTTAGCCGAG

>D8PAK:00223:00009
TTGTAGTCCTTCTTACAATTTGAA

>D8PAK:00223:00028
CACGGAATTGTATCCTCTCATACT

>D8PAK:00226:00021
TCGAATTTTGTGTTCCCAGTTACA

>D8PAK:00226:00042
AATGAATTGTATGTCACACTACGT

>D8PAK:00227:00013
AATCTTTGTAACATAACGTACAAA

>D8PAK:00228:00035
GTTGGGATTGTGGTCTAGGCTACA

>D8PAK:00228:00049
TCATATTGTGCCTCATCATACATT

>D8PAK:00230:00030
GATAAGATTGTGCTCCTTGGTACA

>D8PAK:00230:00041
CGCGCAGTTGTAATGTAGATCACA

>D8PAK:00231:00031
TGTAGATTGTAACGCTGCCTACAT

>D8PAK:00231:00035
TGACTCTTTGTGGCCCGCGATACA

>D8PAK:00231:00041
TTGTAATCTGAGTCACAATTCCGA

>D8PAK:00232:00027
AATAAATTTGTAGTTTACCTTACA

>D8PAK:00232:00028
CCATAGATTGTGTCTTAGAACACA

>D8PAK:00232:00047
TGTTTGAATGTATTGTACACTACA

>D8PAK:00233:00007
AAAGAAAATGTATGAAGGACCACA

>D8PAK:00233:00018
CTGAACTGTGTCCCACAGTACATA

>D8PAK:00233:00048
TTGCCTATTGTAGCCGATAATACA

>D8PAK:00234:00010
ATGCAGCAGTTGTATCCGTCTTAC

>D8PAK:00234:00012
TTGTATTCCAAGCTACTATTTTAT

>D8PAK:00234:00038
ATGTAACCTACGCCACAGTTCGAA

>D8PAK:00235:00005
AAGAGTATTGTAGTCCCGCTTACA

>D8PAK:00235:00044
CGACAGACTGTAGCCCGACATACA

>D8PAK:00235:00045
CCCTATTCTGTATCCCAGCTCACA

>D8PAK:00235:00046
AATTGGTTTGTAGTAGGTGCTACT

>D8PAK:00236:00006
ATCAGTCTGTAACCTGGGATACAA

>D8PAK:00236:00007
TAATGTATTGTGAGCTAGGACACA

>D8PAK:00237:00028
TTGTATGATAGAATACTTTATCGT

>D8PAK:00237:00039
CATCAGTTTGTATCGTAGACCACC

>D8PAK:00239:00032
CAACCATTTGTAAGCCGTGCCACA

>D8PAK:00239:00040
GCGTAGATTGTGATATGGGTCACA

>D8PAK:00239:00042
GATTGCTCTGTAGTACAGACTACT

>D8PAK:00240:00048
TTAGACTTTGTAACCCACAACACA

>D8PAK:00241:00021
CTGGATATTGTAGCCTAACTTACT

>D8PAK:00242:00008
ATGTAATTTGTGCTTTCGCATACA

>D8PAK:00242:00023
CTGAGATTTGTAATCTGGACTCCA

>D8PAK:00242:00042
CTTAATAATGTACGCTACGCTACA

>D8PAK:00243:00026
TGATAACTTGTGTGCTGTAATACA

>D8PAK:00244:00008
TGTCAAATTGTACTGAGGACTACT

>D8PAK:00244:00021
TTGTAGCCTAGCATACATTTCTTG

>D8PAK:00244:00023
CTCGTAATTGTGTCCTGCCATACA

>D8PAK:00245:00022
TTTACTGCGCCATCCATGTTGTGA

>D8PAK:00245:00026
ACCTAATTTGTAGTCTAGACAACA

>D8PAK:00246:00011
TTGTATTCCCGCATACTCTTGTGT

>D8PAK:00246:00039
TAGACAATTGTGGGCCCCGATACT

>D8PAK:00246:00045
TTTGAAAATGTGTCCTACAATTCA

>D8PAK:00246:00048
ATTCGAATAGTAGGTCCGCATACA

>D8PAK:00247:00045
AAATGGACTGTATGTTGCGACACG

>D8PAK:00248:00039
CACTAAATGTAAGGTGGGATACAA

>D8PAK:00248:00042
CGTGAATTGTAAGTTACAGTACAT

>D8PAK:00248:00049
GCTTTTTCTGTATTCTGGGATACA

>D8PAK:00249:00019
ATTGACAATGTAGCTTGGCCTACT

>D8PAK:00249:00047
AGATTGTATCCGAAGTCACAATGA

>D8PAK:00249:00049
AACTAATTGTAAGACGGACTACAA

>D8PAK:00200:00060
AGCCCAATTGTGATCTCAACTACG

>D8PAK:00200:00067
GTTGCAAGTGTAGTCCAACATACT

>D8PAK:00200:00088
TTTGGGTTTGTAAGGTACGACACA

>D8PAK:00200:00089
GTGCGAAGTGTGTCCCTGATTACA

>D8PAK:00200:00090
TCATTGAATGTGTCTTGACATACA

>D8PAK:00202:00076
AATTCTAATGTATGCTAGAATACA

>D8PAK:00202:00087
CGTCAAATTGTAGCGCAATGCACA

>D8PAK:00202:00092
ATCTTGATTGTGTGACAGGTCACT

>D8PAK:00203:00073
TTACCCATTGTATGCTGCAACACT

>D8PAK:00203:00081
TATCAATTTGTATGCCCTATTACA

>D8PAK:00203:00086
TTGTAACCGGCACTACATTTTTGT

>D8PAK:00204:00088
ATGTATCCTGCGCTACAATTCTAG

>D8PAK:00207:00057
ATCAAAATGTGGCCTATACTACAC

>D8PAK:00207:00062
TTGTGTCTTAGGCCACATTCTAAA

>D8PAK:00207:00066
TTGTATGCTACATTACATTCTGTC

>D8PAK:00207:00075
TAATCAATAGTAGCTTGTCATACA

>D8PAK:00208:00084
CTCAAACATGTAGCCCATAATACA

>D8PAK:00209:00058
TATGCGATTGTAGTTCCGGCTACA

>D8PAK:00209:00063
AACGTAAATGTAATTCAGCGTACA

>D8PAK:00209:00084
AAGTAGAGTGTATGCGCGACCACT

>D8PAK:00210:00075
CTTTGATATGTGACCTATATTACA

>D8PAK:00210:00080
TGTAAGATCGTAGTCTACGTCACT

>D8PAK:00210:00083
ATTGATATTGTATCCTGTATCACA

>D8PAK:00211:00088
CCAACTGTGGCCTGCATTACATTT

>D8PAK:00212:00050
CTAAGAATAGTAGTACACATTACA

>D8PAK:00213:00075
CGTACAATAGTGGTCCAGGGCACA

>D8PAK:00214:00055
CTGTATTCGGTAATACAATTTCAT

>D8PAK:00214:00082
CCTCTGCCTGTATTCCAGGCTACA

>D8PAK:00215:00054
TGTCCGACTCCATCCGGCTAACAG

>D8PAK:00215:00062
AGTTGAAATGTGACGGGGGATACG

>D8PAK:00215:00067
CTCCGTGAGCCATCCTCCTTTCTT

>D8PAK:00216:00073
TTGTGCCGTATGCCACGATGTTTG

>D8PAK:00216:00094
GTCCCATTTGTGACTCTGGTCACA

>D8PAK:00217:00085
AGTAGAAAAGTAACCCTGACTACA

>D8PAK:00218:00068
CGACGTACTGTAACCTAGCCTACA

>D8PAK:00218:00071
TCGCCAATTGTACTCAGGCCTACA

>D8PAK:00218:00086
TAGTGATCCAGGTTACAAAGCTAG

>D8PAK:00219:00050
GTGCCTTTTGTGTGCTGCGTCACA

>D8PAK:00219:00052
CATGAGACTGTGGCCCTCATTACA

>D8PAK:00219:00059
TGACGATTTGTGTCGTAGCGTACT

>D8PAK:00219:00091
AACCAGTCCATCCGTATACCCACT

>D8PAK:00219:00097
TTGTGTCCTGGGGTACAGTTTGAC

>D8PAK:00220:00068
CCTATATTTGTGACCCCCATCACA

>D8PAK:00221:00053
AGACGGATTGTATTTTGTACTACT

>D8PAK:00221:00055
AATCTGAATGTGCCGTAGGACACA

>D8PAK:00222:00053
ATGGAAATGTAACACATAATACAA

>D8PAK:00222:00070
GGCTTAATTGTAACCAGGCACACA

>D8PAK:00223:00059
GTTTCGTTTGTAGCGTATGTTACA

>D8PAK:00224:00065
CAAAAAACTGTATTCCAGAAGGGA

>D8PAK:00225:00093
CTGTAGTCTGCGACACAATTAACC

>D8PAK:00226:00087
CGACCAATTGTGACCCAGGCAACA

>D8PAK:00226:00096
TATCACTTTGTAACTTAGAATACT

>D8PAK:00227:00075
TTCACAACTGTATTGTAGATTACG

>D8PAK:00227:00086
CATGTTAACTGTAGTACAGAATAC

>D8PAK:00228:00079
CACTGATTTGTGCTCTAGAATACA

>D8PAK:00228:00088
TATTTCTATGTACGCCAGGCCACA

>D8PAK:00229:00058
ACATTAATAGTATCGTAGAACACA

>D8PAK:00229:00072
TTTAAAATTGTGCCCCAGGTTACG

>D8PAK:00229:00085
ACCAGAACTGTATGCCAAAGTACA

>D8PAK:00229:00090
CTCTCAATTGTACTCTGTCATTCA

>D8PAK:00230:00057
TTGTATGCCAGCAGACAATTTATA

>D8PAK:00230:00080
TTGTAGGCTAGAATACAAAACTTC

>D8PAK:00230:00083
ATGCTCATTGTACTCCTGAATACA

>D8PAK:00231:00051
TTCCGTATTGTATTATGGGCCACT

>D8PAK:00231:00075
GACGCAAACGTATGCTGGACTACT

>D8PAK:00231:00092
CAGTGTTGCTCATCCCACATTCTT

>D8PAK:00233:00058
GTGCAAATTGTACCCCTGCCCACA

>D8PAK:00233:00082
CATAAAATTGTGTCTCGCACCACA

>D8PAK:00234:00050
TTTAGACTACCATCCTAGGTTATT

>D8PAK:00234:00058
GAACAGTTTGTAGTCCCGCTTACT

>D8PAK:00234:00065
AAATTTTGTAATTTACGCTACAGT

>D8PAK:00234:00069
TGGAAGACAGTAGTCTAGACCACA

>D8PAK:00234:00071
CTGGCCATTGTATCCTAGCACACA

>D8PAK:00234:00091
ACGGTCATTGTATGCTAGAATACC

>D8PAK:00236:00053
AATACAATTGTATTCCTCATCACA

>D8PAK:00236:00072
CAGACGTTTGTAGCGCGCACCACA

>D8PAK:00236:00077
TTACCCATTGTAACTAGCGCCACA

>D8PAK:00236:00083
CATCAGAAATGTATCATAAGATAC

>D8PAK:00236:00095
TTGTGACCTACCATCCAATTCACC

>D8PAK:00237:00056
GCAGTGAATGTGCTATAGCATACA

>D8PAK:00237:00059
AAGCTTTTTGTAGCCCACGTTACA

>D8PAK:00237:00060
CACCAATTTGTACGCTGACTTACT

>D8PAK:00237:00075
GTTAGGACTGTATTCGGGCATACA

>D8PAK:00238:00087
TTCGATTGTATTAAGGACTACACA

>D8PAK:00240:00061
TTAGGGATTGTATTCCTGCCTACT

>D8PAK:00240:00099
TTTTTAATTGTGGCCTCTTGCACA

>D8PAK:00241:00075
CAACGTATTGTATCATGCACTACA

>D8PAK:00242:00066
TTGTATCCTGAACCACAGATATAA

>D8PAK:00242:00071
TTGTATTCGCTGATACTATTTGGG

>D8PAK:00243:00078
TGTAGGATTGTATTCCCACGCACA

>D8PAK:00243:00097
ATACATATTGTATCGTGGAATACA

>D8PAK:00244:00070
CTGTGTCCCGGATTACAATTTGCC

>D8PAK:00245:00078
GACTTATTTGTATGCTAGAACCCT

>D8PAK:00246:00089
TTTACCTTTGTGTTCTAGATTACA

>D8PAK:00247:00059
GAATTGTAGCATCCAGTACATTTC

>D8PAK:00247:00075
TCGAATTGTGCGGCCGGATACAAA

>D8PAK:00247:00084
AATAAAAGTGCCCCAAGCTACACT

>D8PAK:00247:00087
AAAACGACTGTGTTAAGGGTCACA

>D8PAK:00247:00093
GAGAAGATGTATCGTAGAATACAA

>D8PAK:00249:00051
AGAAATGTATCCTATCTTACAATA

>D8PAK:00201:00112
CTTATATTTGTATCCTCGCTTACA

>D8PAK:00201:00114
ATAATATTTGTATTGCAACGTACA

>D8PAK:00201:00129
GAAAGAATAGTACTCTGCATCACA

>D8PAK:00201:00138
ACCAAGAATGTAGCACAGCATACA

>D8PAK:00201:00143
AAATCAAAGGTATTTTGGGCTACA

>D8PAK:00202:00102
CAATTTCTGTAGCCCCGACTACAC

>D8PAK:00202:00107
TTGAAATATGTGTCCCTGATTACA

>D8PAK:00202:00121
CCAGCCTTACCATCCTGAAAGCCA

>D8PAK:00203:00114
ATAGAATTGTAGTCCGCGGAACAG

>D8PAK:00203:00116
TTGTAGTCCCGCTCACACTCTGCC

>D8PAK:00203:00136
TTGTATTACAGACTACTTACTTCG

>D8PAK:00203:00137
CAACAAATGTATTGTGGGGTACAA

>D8PAK:00204:00112
AATCCGTTTGTGTCCCAGACTACT

>D8PAK:00204:00137
ATGTGAAATGTCACACAGATTACA

>D8PAK:00205:00124
CCGCTGCGACCATCCTACAATTAC

>D8PAK:00205:00140
TTGTGTGCTAAACTACTTTTCGCA

>D8PAK:00206:00109
TTGTGGTTCGCGCTACAATTGCCG

>D8PAK:00206:00124
CCACAGAATGTGCTCTAAGCCACA

>D8PAK:00206:00138
CATAACACTGTACGCTGTCTTACA

>D8PAK:00207:00116
CCTTACTTTGTATGGTAGAACACT

>D8PAK:00208:00132
GTGTAGACTGTAACGTAGCATACT

>D8PAK:00209:00137
TCGGCAATTGTAACTCACGATACG

>D8PAK:00209:00140
AAAATCATTGTAGCGTGAGCTACA

>D8PAK:00210:00100
GCGTATATTGTAGTACAGGCTACA

>D8PAK:00210:00101
TATCGAAATGTAAGGCCGCATACA

>D8PAK:00210:00106
TTGCGACCCAGGATACAATAGCCT

>D8PAK:00210:00111
GTAAATGTATTCTACATTACTAAA

>D8PAK:00210:00128
ATTGATATTGTATCCTGTATCACA

>D8PAK:00210:00136
TGATTGATCGTAGTCTAAGCTACT

>D8PAK:00210:00144
ATTTTGACTGTGCGCAGGGTCACA

>D8PAK:00210:00147
ATGTATCACGGGCTACATTTTCCA

>D8PAK:00212:00103
GGCAAATTGTGACGTAAATTACAT

>D8PAK:00213:00106
TATTGATTTGTGGCATGGCTCACA

>D8PAK:00213:00109
TCCTAAATTGTGTTTTGTGACACA

>D8PAK:00214:00106
GACCATATTGTATTCCCTAATACT

>D8PAK:00214:00117
GGGACAACTGTATCATATAATACA

>D8PAK:00215:00100
AACTCGACTGTATTCCCCGGCACT

>D8PAK:00215:00132
GTAAATTCTGTGACCCAACATACA

>D8PAK:00216:00113
TTGTATTCTTGGTTACAGATATGT

>D8PAK:00217:00140
TTGTAATATGTATTGTGGCGTACA

>D8PAK:00217:00143
GTTTCAATTGTATGCCTCGCCACA

>D8PAK:00217:00148
GACTACTATGTATGCTGGCATACT

>D8PAK:00218:00129
TTTTCTGTAATCTAGGCTACACTT

>D8PAK:00218:00142
TCTGTCATTGTACTTTGGAACACA

>D8PAK:00219:00109
ATTTGAATTGAATGCTAGGCTACA

>D8PAK:00219:00123
CTGCCGATTGTATGCCGTCATACA

>D8PAK:00219:00129
ATCTAGATTGTATTCTGTGCTACC

>D8PAK:00219:00135
AAGTGGTTTGTATCCAGGCTTACA

>D8PAK:00220:00139
ACCGTGATTGTATATCAGATTACA

>D8PAK:00221:00116
TTCGCATGTGTATGCTACGATACA

>D8PAK:00221:00136
GACTAAACTGTAGCCCCGAGTACT

>D8PAK:00222:00122
ATTATTGTAACCCAGGATACATAT

>D8PAK:00222:00139
TGAATCTTTGTGCCGCCGGATACA

>D8PAK:00222:00147
AATGAAACGTCATCCTTTCACCCT

>D8PAK:00223:00118
AGAAATCTTGTATTGTACGCTACA

>D8PAK:00224:00112
TAGTAGATTGTGATCTACAGTACG

>D8PAK:00224:00120
GACTGTAAGCCAGATTACTTTTTG

>D8PAK:00224:00145
TTGTGCTACAGATTACAATTTAAT

>D8PAK:00225:00109
GGATTTTCTGTGACCCCGGCCACA

>D8PAK:00225:00111
TGCAAATGTGCTCCATCCTACACT

>D8PAK:00225:00118
CAAAAATGTGTAGTAGGGGTCACA

>D8PAK:00225:00121
CCGAAGAATGTATTCCAAAGTACA

>D8PAK:00225:00148
GCGATAACAGTAAGCTGCATTACA

>D8PAK:00225:00149
ATAAAGAATGTATGCCCAACCACA

>D8PAK:00226:00113
TTCTTGAGCGTATCCCAGGTTACA

>D8PAK:00227:00103
GCATCAATTGTGGTGCACACTACT

>D8PAK:00227:00121
CCTAGGATTACATCCGGTTTCACA

>D8PAK:00227:00129
AAGAAAATTGTCGCCGAGGACACA

>D8PAK:00227:00130
TTTTCAATTGTATACCAAGCCACA

>D8PAK:00227:00135
GACCAGATTGTGAGGTGCACTACA

>D8PAK:00228:00110
TACAGGTCTGTGATCCAGGCTACA

>D8PAK:00228:00115
CCCTCTATTGTACGCTAGCATACA

>D8PAK:00228:00125
ACCAGCAATGTAGGCCAGCTTACA

>D8PAK:00229:00109
TGACTGTCTGTATGCGAGACTACA

>D8PAK:00229:00122
AGTCGTATTGTAGCCTACACTACA

>D8PAK:00229:00128
TCTATAATTGTATTCTCTGATACG

>D8PAK:00229:00136
CTACAACTGTGGTTTGAACTACAC

>D8PAK:00230:00105
CGCAGGATTGTATTCCCGCATGCA

>D8PAK:00230:00106
TTGTAATCTGACATACAATCCCTG

>D8PAK:00230:00142
AAGCAACTGTATGCTGTACCACAG

>D8PAK:00231:00110
AGTATAATTGTAGCTTAGGACACT

>D8PAK:00233:00124
CTGCTATCCTCATCCCTTTTACCC

>D8PAK:00233:00140
GATTGCATTGTAGTCTAGCATACA

>D8PAK:00234:00101
TAGTATTCCAGAACACATTCTATA

>D8PAK:00234:00110
TAAACAATTGTAGTCTGTGTGACA

>D8PAK:00234:00121
CAAGGTCTTGTAAGCAGGGCTACA

>D8PAK:00235:00118
AGCCACATTGTGAGTTACGATACA

>D8PAK:00235:00121
TTTATAATTGTAGCTGAAGTCACA

>D8PAK:00235:00147
GAAATTATTGTAGCCTACGCTCCA

>D8PAK:00237:00127
GAAAGAAATGTGACCTCACGTACA

>D8PAK:00237:00128
GTCGAAACTGTAGGCCAAATTACA

>D8PAK:00238:00101
TCCTACATTGTATTCTAGGCTACA

>D8PAK:00238:00139
GTGCACCCGCATCCTTATTTTTTA

>D8PAK:00239:00103
CTCTGAGAACGTATGCTGCAATAC

>D8PAK:00239:00118
AATGGGTTTGTATCATAGAACGCT

>D8PAK:00240:00118
ATGATGTCACCATCCGCATTTACC

>D8PAK:00241:00124
TTGTAGCACATCCTACATTTTGAC

>D8PAK:00242:00119
AAGTAGTCCAAGTCACAATTGGGA

>D8PAK:00242:00148
TCCATAACGGCATCCGCTCCACCA

>D8PAK:00243:00111
ACATTGTGTTCCATAATACAAAAA

>D8PAK:00243:00116
ATGTGATCCGGACCACAATTTAAG

>D8PAK:00243:00117
GTGATGATTGTAGTATAAACCACT

>D8PAK:00243:00137
TCGAGAGTGTGCCCTGCGTCACAG

>D8PAK:00243:00139
AAAAAACCTGTACGCTAGAATACC

>D8PAK:00244:00142
GATTGCACTGTAGCCTGCGATACA

>D8PAK:00245:00103
AGCAAGAATGTAGTCCGAACTACT

>D8PAK:00245:00106
GAGGATACCGTGTGCTGGAGTACA

>D8PAK:00245:00144
TGTATCATTGTATTATAGACTACA

>D8PAK:00246:00134
ACAAACTTTGCATCCCAAATTACT

>D8PAK:00247:00102
TTGTATTACGGAATACATTGTAGG

>D8PAK:00247:00108
TCTATGTTTGTACGCTGCCGCACA

>D8PAK:00247:00141
CTAAAATTGTATGCCAAGTTACAT

>D8PAK:00248:00114
TTGTAACCCGGCCTACAAATCATT

>D8PAK:00248:00118
ATGTAGTGTGTATTGGTAGATACA

>D8PAK:00248:00120
ATAGAAATTGTGTCATACGTCACA

>D8PAK:00248:00143
CATGGATTGTAGCCTCGCATACCT

>D8PAK:00249:00118
CAAGCGTTTGTGACTTGGACTACT

>D8PAK:00249:00133
AAACGCTACCATCCTAAAACCGTA

>D8PAK:00249:00136
TGTAGCCTGGACTACAAAGTTAGA

>D8PAK:00200:00179
CAGCTAATTGTAGTGTACTATACA

>D8PAK:00201:00155
CAAAGAATTGTATCCACGACTACT

>D8PAK:00202:00151
GAACTTTTTGTAACCCACGGCACA

>D8PAK:00202:00182
CCCTGCTCTGTAGCCTCGAATACA

>D8PAK:00203:00165
AATTTAATTGTACTGCTAACCACA

>D8PAK:00203:00173
AGCGACATTGTGCCACTGAATACA

>D8PAK:00204:00169
TTGTAGTCTGGGTTACATTTCCTC

>D8PAK:00205:00171
CCGTCCCTTGTAGCCCACGACACA

>D8PAK:00206:00150
ATGAACTTTGTAACTGGGACTACA

>D8PAK:00207:00155
TACTTTGTAGTGCGCGTTACAATT

>D8PAK:00208:00151
TAATGCTTTGTATCCTGCAATACA

>D8PAK:00208:00155
CTCAAGATAGTATGTTGTCGTACA

>D8PAK:00208:00157
AACTGAATTGTATCCCCTCGCACA

>D8PAK:00209:00197
TCTATATGTGTCCTGCGCCACAAC

>D8PAK:00210:00153
TTGTAACATACACTACATTGTTAG

>D8PAK:00211:00162
TCCAAGATTGTGACCCCGAGTACG

>D8PAK:00211:00166
CGTCAAATTGTAGCGCAATGCACA

>D8PAK:00213:00161
AATATGATAGTATTGTATAATACA

>D8PAK:00213:00168
TAAAATAGTGGCGCCGGCTACACT

>D8PAK:00214:00151
AAATAGATTGTATCTTGAGTCACA

>D8PAK:00214:00154
TTCCAATGTGTGGCGTGGATCACA

>D8PAK:00214:00166
TCCGCCATTGTATGATGAGCCACA

>D8PAK:00214:00178
CCACCGGCATCATCCATCTATATT

>D8PAK:00214:00194
CCAGCAATTGTAGTTTGGCTTACT

>D8PAK:00215:00184
TCACTGATTGTAGGCTGGACTACA

>D8PAK:00215:00186
TTTAAGTACGCATCCTGGGCAACA

>D8PAK:00217:00153
CGTAAGTTTGTAATTTACCCTACA

>D8PAK:00217:00158
CTGCCTAATTCATCCGCGACGCTG

>D8PAK:00217:00195
ATTTTTTTTGTGATCGACATTACA

>D8PAK:00218:00192
CTTTGTGTCCTAAGGCACATTTTC

>D8PAK:00219:00162
TTTCGGATTGTGTTCTACACTACA

>D8PAK:00219:00176
CGCTAATTGTATTCTATGCTACGA

>D8PAK:00219:00187
TCGGCGTTTGTGCTCTGGATTACT

>D8PAK:00221:00197
TTGTATCCCCGCCCACATACTTAA

>D8PAK:00222:00178
TTCGAATTTCCATCCAGAACGAGA

>D8PAK:00222:00193
CTACAAATTGTATTCCCTACGACA

>D8PAK:00223:00164
CAAATGTTTGTATTTCAGACCACA

>D8PAK:00224:00155
TGTTCAATTGTGCCGCATGTCACA

>D8PAK:00224:00178
ATTAACATTGTGATTTGAACCACA

>D8PAK:00224:00189
GGTAACAATGTGCCCCCTGCCACA

>D8PAK:00226:00150
CTTCGCTTTGTAGTACATGACACA

>D8PAK:00227:00156
CCAGAAATTGTAATTTGAGCCACA

>D8PAK:00227:00169
AATTAAATTGTGTTCATAGATACA

>D8PAK:00227:00171
ATCTAAATTGTAGTGTAGGCCACT

>D8PAK:00227:00179
AAAAACCCCCATCCTTGCCGGCAA

>D8PAK:00228:00180
CGATTAATTGTACCACAGGTTACA

>D8PAK:00228:00194
TTTTCGAATGTACTCTGTACTACT

>D8PAK:00228:00199
CAGTTAATTGTAGCATGGAGCACG

>D8PAK:00229:00177
AATTTTGTGACCTAGCTTACTTTT

>D8PAK:00230:00195
CTGGAATTTGTGTGGTAGACTACA

>D8PAK:00231:00157
CCTTATCTTGATCGTCGCACTACA

>D8PAK:00231:00194
AATCCGAACGTAGCTCAGGTTACT

>D8PAK:00232:00183
GTAACTGTATTCCAGGTTACAATT

>D8PAK:00232:00191
ACAGACATCGTAGCATGTAATACA

>D8PAK:00233:00151
AAAAAATGTATCCCCGCATACTTA

>D8PAK:00233:00159
TCTTTGTCCGCCATCCGATGACAC

>D8PAK:00233:00173
TTGTATTCTAATTCACAATTGGGA

>D8PAK:00234:00156
TTGTGACCTGCGGCACAGTTAGAA

>D8PAK:00234:00173
TCGAAATTGTAGCACGCCCTACAC

>D8PAK:00234:00183
ATAAACATTGTAGCACACGCCACT

>D8PAK:00235:00157
TTGTATGCTAGCCTACAATCAACA

>D8PAK:00236:00152
TTCTAATTGTGATCCACATGACAA

>D8PAK:00236:00169
CGAAATAATGTGATCTGGAGCACA

>D8PAK:00236:00173
TTGTATGATGGAATACACTACGGC

>D8PAK:00237:00172
CGGTACCGATCATCCCAGGCGGTA

>D8PAK:00237:00199
TTGTATATTGTATTGTAACATACA

>D8PAK:00238:00150
TTGTACTCCAGCACACAATCGTTC

>D8PAK:00238:00158
AATTATTTGTATCGCAGGATACAC

>D8PAK:00238:00168
TGCCCAACTGTAGTGCCCACTACA

>D8PAK:00239:00183
CTTCCAATTGTATGTTAGCCCACA

>D8PAK:00241:00156
CTTGCATTTGTGACGTGCGTTACA

>D8PAK:00241:00166
CGTCAAATTGTGTCGGAAGTCACA

>D8PAK:00242:00164
CCTAAGTTTGTAGTCCAGGGCACT

>D8PAK:00242:00184
GCTGTGATTGTATGCCTCAGCACA

>D8PAK:00243:00157
GTTGCGAATGTAGCCCACAATACT

>D8PAK:00243:00187
GATGACATTGTATCCCACGTTACT

>D8PAK:00243:00193
TTGTGTTCTCGCATACATTTCGCT

>D8PAK:00244:00172
TCAAATCCTCCATCCTGGGGATAC

>D8PAK:00245:00150
ACTCAAACTGTGGTTTGGATTACA

>D8PAK:00245:00182
TTTTACATTGTGATCTACCATACT

>D8PAK:00246:00152
AAGCGCTGACCATCCAGTTAACTA

>D8PAK:00246:00175
TAGTTATTTGTGGCCCCCGTCACA

>D8PAK:00246:00183
GGAAAGTCTGTATCATAGGCTACA

>D8PAK:00247:00161
TGCATCATTGTAGCCCAGTCCACA

>D8PAK:00247:00169
GAAGTGATTGTGGCCTGTGTTACT

>D8PAK:00247:00176
AACGTTATTGTAGCCCCCATCACA

>D8PAK:00247:00184
CACTAGAGTGTGTCTTGGGATACA

>D8PAK:00247:00199
GATCGTCCTGTAGTCTAGCCTACA

>D8PAK:00248:00166
GAAAAACTGTATTCGAGAACACAC

>D8PAK:00248:00180
AATAAGAATGTACTCCCGCATACT

>D8PAK:00248:00185
CATAACACTGTACGCTGTCTTACA

>D8PAK:00248:00193
TTGTAATACGTATTACAATCTCAG

>D8PAK:00249:00165
TTGTATTTGCGGCTACATTTGAAC

>D8PAK:00249:00172
CCCTTCATTGTATGCTAGCGTACA

>D8PAK:00249:00178
GAAGGAAACGTACTGCACATTACA

>D8PAK:00249:00187
TCCCGAATTGTATTCTGTCCTACA

>D8PAK:00200:00235
ATTGGGTGCTCATCCGAATGTCTT

>D8PAK:00200:00245
TGACCAATGTGTTCCAGCATACAT

>D8PAK:00201:00208
AATGAATTGTGACCTAAGCCACAA

>D8PAK:00201:00247
CTGTATTATGTAGTCTACATCACA

>D8PAK:00202:00201
CTGTAATTGTATGTGAGGTCACAA

>D8PAK:00202:00218
GGTTTATTTGTATCCCAGCTTACT

>D8PAK:00202:00231
TTCCACACTGTAATCTGGCATACT

>D8PAK:00202:00240
GGCAAATTGTGATCGGGATTACAA

>D8PAK:00203:00205
TAGGCGACTGTGACCTGGACTACG

>D8PAK:00203:00222
CTCAGGAACGTATGCCAGACTACA

>D8PAK:00203:00229
GTATAAATGGTATCCCACGCCACA

>D8PAK:00203:00232
CTGTATTCCAGCTTACAATTGTAC

>D8PAK:00204:00230
GCCATGTTTGTAATGCACACTACA

>D8PAK:00206:00211
TAAGTTTTGTATTCTAGATTACAT

>D8PAK:00206:00218
GATTGCAAATGTATCGTAGGTCAC

>D8PAK:00206:00232
CCTGCGCTACCATCCTCTTATGTT

>D8PAK:00206:00246
TCCACGATTGTATCAGAGCTTACA

>D8PAK:00207:00216
CGGACGACTGTATGCTGTACTACA

>D8PAK:00207:00224
TATTTTATTGTATTCGGGGATACG

>D8PAK:00207:00241
TTGTGTCCTATGTTACAATGGATA

>D8PAK:00208:00218
GTTCTATTTGTGCCTTGTATTACA

>D8PAK:00208:00247
AGTAAAAATGTATATTAGACTACA

>D8PAK:00209:00218
ACCGGATTTGTATTCCTCGCTACA

>D8PAK:00209:00245
GACTAATTTGTAATCCAGCATTCA

>D8PAK:00209:00247
ATTAAAAATGTAACATACACTACA

>D8PAK:00212:00230
TGAAAAATTGTAGCCCGTAATACC

>D8PAK:00212:00231
CTACGAAGTGTAGTATAGAATACA

>D8PAK:00213:00200
GATCTTATTGTATGCCGTCTTACA

>D8PAK:00213:00247
TAAAAATGTAACCTCAGATACACT

>D8PAK:00214:00207
TCAAGAACTGTATCCCTACTTACA

>D8PAK:00214:00212
AACCGCATCCGTATGTCTCCTTAG

>D8PAK:00214:00229
ATGTATCCTAGAATACACTTTAAA

>D8PAK:00215:00229
GACTTTGTCCCATCCGATATATCT

>D8PAK:00216:00226
CCTGATATTGTGACCTATATTACA

>D8PAK:00216:00236
CTCCTATTTGTATTCTCGGTCACA

>D8PAK:00216:00245
CAAATTGTGATCTGTAATACATTA

>D8PAK:00218:00202
TTGTAGTCGACGACACAATTTAGA

>D8PAK:00218:00219
GCCAGGATTGTAGCCCTAATTACC

>D8PAK:00218:00227
TTCTGATTGTGACCCCGAATACTT

>D8PAK:00218:00232
AACCCGATTGTATCGCTAAATACT

>D8PAK:00220:00218
AATGCAACAGTATTTCAGCCCACA

>D8PAK:00220:00227
TCGGGACCTGTAGCCTGCACCACA

>D8PAK:00220:00240
AATGTAATTGTAATAGAGGTCACA

>D8PAK:00221:00227
GGTTTAAAAGTACGCCGAACTACA

>D8PAK:00221:00238
CCTCTGAGTGTATTCCCAAATACA

>D8PAK:00222:00218
ACAACGACTGTGCCTCGAGTCACA

>D8PAK:00223:00202
TACGGAAAAGTAATGCACGATACA

>D8PAK:00223:00203
TTTTCTGTAAGCTAGCATACATAG

>D8PAK:00223:00210
TAAAATTTGTGCTATACGCTACAG

>D8PAK:00223:00217
AATGGATTGTAACTTCGCTCACAC

>D8PAK:00224:00204
GTTTTCTTTGTAGCCTAACCTACT

>D8PAK:00224:00215
TTGTGCCTTGCAATACACTCAGGA

>D8PAK:00225:00207
TCCTTAATTGTGGCGTGCACTACT

>D8PAK:00225:00212
ACTTTTACTGTACGCTGTATTACA

>D8PAK:00225:00230
GTCCACCCTGTGAGCTGGGTCACA

>D8PAK:00225:00245
AACGACACTGTATCCCTGGCTACT

>D8PAK:00226:00225
CTCATGATTGTCAGCTGGCTTACA

>D8PAK:00226:00233
TAATGCATTGTGAGCCAGCACACA

>D8PAK:00226:00240
TATCCGACTGTGTTCCGCATTACT

>D8PAK:00227:00233
CACCTAATTGTAATGTAGCCCACA

>D8PAK:00227:00236
GTCGAAAAAGTGGTCTAACTTACA

>D8PAK:00229:00210
GAATTGTATGCTAACATACAATAT

>D8PAK:00229:00235
TTGTAATATGTATTCCCGGTTACA

>D8PAK:00230:00202
GTAAAGATTGTATGCCGGATTACT

>D8PAK:00230:00238
ATCAAGTTTGTGTGCCTGGGCACA

>D8PAK:00231:00207
GTGTAGTGTACGTCACAGTTCTAC

>D8PAK:00231:00223
CTGTGTTCCCGGATACAATTAGTC

>D8PAK:00231:00237
ACATAATATGTACTTTGGACTACA

>D8PAK:00231:00245
TACGGAGATTGTATTCACGGGTAC

>D8PAK:00232:00207
CGAGCGACTGTGTGCTAACGCACA

>D8PAK:00232:00230
AAATAATTGTAGTTCCAACTACAC

>D8PAK:00232:00240
GCACTTAACTCATCCATTGCATAC

>D8PAK:00233:00220
AATTAATTTGTGTTTGGGGACACA

>D8PAK:00234:00204
TAGCCGATTGTATTTCTTACTACA

>D8PAK:00234:00217
TACAGCACAACATCCAGCGCTCAG

>D8PAK:00234:00244
GGATAGTCTGTATCACAAGCTACA

>D8PAK:00235:00237
GATAAATTGTATGATGTGACACAG

>D8PAK:00235:00244
CCTTTAATTGTATCAGGGAATACG

>D8PAK:00235:00247
GGAGGGATTGTAATATGGAGTACT

>D8PAK:00235:00248
AATGAGTTTGTGAGCGTCGTTACA

>D8PAK:00236:00217
TTTTTGAATTGTATCTCAGACTCC

>D8PAK:00237:00202
TTCCCAAATGTGGTGTAGGTTACG

>D8PAK:00237:00234
TTGTAACCCGTAACACAATTTTTC

>D8PAK:00238:00221
TTGATTTCTGTATCCTATATTACA

>D8PAK:00239:00218
TCACGAAATGTGTTTTGCAACACA

>D8PAK:00240:00201
TAGTGTTGTGGGACACACTTTCCC

>D8PAK:00240:00213
ACTTTTTGTGTGACTTACGCCACA

>D8PAK:00241:00236
TTGGACTTTGTAGGCTGGCATACA

>D8PAK:00242:00205
ACCTGATTTGTGTCCTAAGGTACA

>D8PAK:00242:00214
GTTACGATTGTGATTCGGACTACA

>D8PAK:00242:00226
CGAGAAACTGTGATCATCCATACA

>D8PAK:00242:00235
TGAATTGTTGTAGCCCCCAATACA

>D8PAK:00242:00236
TTGTGTGCCGGCTTACATTTCGGT

>D8PAK:00244:00242
CACCAAAATGTACTCTGGCTTACA

>D8PAK:00245:00211
TTGTATGCTGAAACACACTTTTGA

>D8PAK:00245:00216
CGTAACTTTGTATGATGGGCTGCA

>D8PAK:00245:00221
CATATCATTGTAACATAGGGTACA

>D8PAK:00247:00203
GAACGAAATGTAATATAGGCTACG

>D8PAK:00247:00227
CTTTACATTGTATGCTAGATCACT

>D8PAK:00248:00222
TTAACAATTGTGGTTGGGGCTACA

>D8PAK:00249:00233
CCTCCGATTGTAGCGCCGATTACA

>D8PAK:00202:00276
GGATCAAATGGATGCCAGCTTACA

>D8PAK:00202:00283
GTCAAATTTGTGACCTAGATTATA

>D8PAK:00202:00285
ATAAGTGTGCTCTAGATTACAGGA

>D8PAK:00204:00265
ATTTATCGCGCATCCCAAACACAC

>D8PAK:00204:00269
TTGTAGGCTAGGCCACTTTCTTAA

>D8PAK:00205:00276
GTGGCTTTTGTAGTCCTTGCTACA

>D8PAK:00205:00279
ACTTGGATTGTAACGACGGATACT

>D8PAK:00205:00294
CCGCTATTTGTATCCTGGCATACT

>D8PAK:00207:00252
AACTGGAACGTATGCTGTCTTACA

>D8PAK:00207:00277
CATTGTGACCTAGCCTACATTTAA

>D8PAK:00209:00278
GCCACGAATGTAGTTGGCGATACA

>D8PAK:00209:00294
AAGAGGATTGTGCTGTAGCATACT

>D8PAK:00211:00277
TTGTACCCTGCACTACAATTGGCT

>D8PAK:00211:00285
TCCTAAATTGTGGTCTGTGATACT

>D8PAK:00211:00297
AGCCAGATTGTAACGTGTGCTACT

>D8PAK:00212:00251
TTTAAATTGTGGTTCATGCCACAA

>D8PAK:00212:00277
CTGAAATTGTGACGTAGATTACAA

>D8PAK:00212:00278
TTGTATCCAGTAATACATTCAACA

>D8PAK:00212:00282
TTTCGTTTTTCATCCGGCATTTAT

>D8PAK:00213:00268
CCTAGAATAGTAGCCTGCGCCACA

>D8PAK:00213:00286
TTGTATTATAAGTCACAATAGTTT

>D8PAK:00213:00290
CTCAAAGCTCCATCCGTACTTTCA

>D8PAK:00214:00298
CGTTTTTTCGTAATCTAAGTCACA

>D8PAK:00215:00256
CTTCAGAATGTGATGTGTGATACA

>D8PAK:00215:00269
CTTTAGTATGTATCCTACATTACA

>D8PAK:00216:00254
AAGAACATTGTAACGGTAAATACA

>D8PAK:00216:00267
TAATCTTCTGTAGTCTGCGATACA

>D8PAK:00216:00272
ATATTCTTTGTATGCCCAAATACA

>D8PAK:00216:00295
TGTCGAATTGTGACGTGTACGACA

>D8PAK:00217:00265
AAAGTCATTGTGCCCCAGCTCACA

>D8PAK:00218:00255
ACCTTTGTATGTTAGGATACAATT

>D8PAK:00218:00266
CCGACATTGTATGACAGGTCACAT

>D8PAK:00218:00285
CGAACGATTGTAATGCATCGCACA

>D8PAK:00218:00287
CCTGCAAACGTAGTCCAAGTTACA

>D8PAK:00218:00292
AAGATAAGTGTAGCCCGGATCACA

>D8PAK:00219:00253
AAATTTGTAGTCGCGATTACAATC

>D8PAK:00219:00293
ATAAACACTGTATCCCATAATACA

>D8PAK:00220:00296
CTGCCTTTGTATTCCAACATACAG

>D8PAK:00221:00259
TCTTTCTCGTATTCCACGACTACA

>D8PAK:00222:00252
TGTTCATTTGTAACCCAGGTTACA

>D8PAK:00222:00261
TTGTGCTCCACGATACAATCCTAG

>D8PAK:00222:00272
GCCGAATTGTGAGCTAGATCACAA

>D8PAK:00223:00259
ACATTAATAGTACTCTGGGTTACA

>D8PAK:00223:00275
TATGACATTGTAATTCACAATACA

>D8PAK:00223:00277
AAAAAAATTGTACTTTGCGCTACC

>D8PAK:00223:00279
TCTGTAACTGTGGGTTAGAATACA

>D8PAK:00224:00268
GCACAGATTGTAACTAGGGTTACT

>D8PAK:00226:00268
CAAAGAAATGTGCCACGGGCTACA

>D8PAK:00226:00273
ATACACTATGTGGCCCACACTACA

>D8PAK:00226:00274
ATTCTGATTGTATGATGGACTACC

>D8PAK:00226:00285
AAAAGGAAAGTATGGTACACTACA

>D8PAK:00227:00254
GACAGGATTGTACTCCGCATCACA

>D8PAK:00227:00284
ATTGACTTTGTAGTCTAGGCTACA

>D8PAK:00229:00250
GCAGAATTAGTGAGCTGGACTACA

>D8PAK:00229:00270
GGTGCCAATGTAACCTCCAATACA

>D8PAK:00229:00279
GGTCACTTTGTGTCGTATCATACA

>D8PAK:00230:00270
TTTAACAATGTGACTTAGCTTACG

>D8PAK:00231:00285
ATCCAATCGGCATCCGTAGCTCGT

>D8PAK:00233:00275
GCGTAAAATGAAGTCTGGACTACA

>D8PAK:00233:00280
CCGTGGCCTCGACTACAATCTGAG

>D8PAK:00234:00280
GAAAACAATGTATCATGCCATACT

>D8PAK:00235:00276
GAAAATGTATGCTACACCACGGTT

>D8PAK:00235:00281
TTGTAGCGCAGACTACAGTTAGTT

>D8PAK:00235:00296
CCTGGCTACCCATCCTGCTTTACC

>D8PAK:00236:00269
GTTCAACTTGTATTCCAGCTTACT

>D8PAK:00236:00275
TTGTGACCCCGAATACTTTTGCCT

>D8PAK:00236:00283
ATCGACATTGTGAGCTCAGATACA

>D8PAK:00237:00258
ATGTGCTCCAGACTACTATCTTTA

>D8PAK:00237:00276
AGATTTCTTGTGTGCTAGGACACA

>D8PAK:00237:00292
CTGAAGAATGTATTACAGAGTACA

>D8PAK:00238:00286
TACCTAAATGTATGCCATATTACT

>D8PAK:00238:00296
GCCGAAATAGTATGCGAGACTACT

>D8PAK:00241:00260
CGGGAGTTTGTATGCCTAAATACA

>D8PAK:00241:00267
CCCGAGAAGGTAGTATGGACTACA

>D8PAK:00241:00297
TTTCCTTCTGTAGCCCACAATACA

>D8PAK:00242:00269
TATCCGAATTGCAACCTGGGTCAC

>D8PAK:00243:00266
ATCAACATTGTGATGTGGACTACA

>D8PAK:00244:00257
GAACTGTAGCCTGAGTTACTAAAT

>D8PAK:00244:00269
AAAGCTAATGTGTCACACGCTACA

>D8PAK:00244:00275
CTCAGAACTGTATGATGGCATACA

>D8PAK:00244:00283
ACTAATTGTGCTCTAGCCCACATT

>D8PAK:00245:00268
CGTCTGATTGTATCGCAGAATGCA

>D8PAK:00245:00270
ATGTGTTCTAGACTACAAAGATGG

>D8PAK:00246:00259
TTTCCAAAGGTAATCTAGATTACA

>D8PAK:00246:00289
GGATTTGCGCATCCTAATTTTCGA

>D8PAK:00247:00271
AATCTCTCTGTATCTTAGATTACA

>D8PAK:00248:00267
CATTCGATTGTATCCTGTAATACT

>D8PAK:00248:00275
TCGTCAATTGTATTCTAACTTACT

>D8PAK:00248:00289
CACTTATATGTATTCTAAGACACA

>D8PAK:00200:00332
GGGCAGATTGTAGGCCCGGCTACT

>D8PAK:00200:00335
AAATTAATAGTATGCTATGCCACA

>D8PAK:00200:00349
ACGCAAATCGTAGTCCAGAACACA

>D8PAK:00201:00309
TAAAAATGTAACCTCAGATACACT

>D8PAK:00202:00310
CATATAAATGTATGCTAGGCCATA

>D8PAK:00202:00324
ATACAATCCCCATCCGCCAAAGAC

>D8PAK:00202:00339
ACCATGATTGTGTCCTATGTTACA

>D8PAK:00202:00341
TATAAAATTGTACTTCCTAATACA

>D8PAK:00203:00308
TTGTAGTCCTCGCTACATTTGAAC

>D8PAK:00203:00323
AAACAAACTGTAGTCCACCATACG

>D8PAK:00203:00327
TAGCGCTTTGTGGTCTGTCCTACA

>D8PAK:00204:00315
AATTTCATTGTGGCCCTAGTTACA

>D8PAK:00204:00322
AAAATTGTGGCCCCCATTACAAAC

>D8PAK:00204:00344
CAGTGGACTGTAACGAGGGATACA

>D8PAK:00205:00322
AATAGGTTTGTGTCTAGGCCTACA

>D8PAK:00205:00329
GTGCTCATTGTATGCCTGGCTACA

>D8PAK:00205:00345
TTTTCAGATTGTGGCCTCTCATAC

>D8PAK:00206:00310
CCCCTCGTCCCATCCTAATGTCTA

>D8PAK:00206:00341
TCCAGTTCAGCATCCGAAACCACG

>D8PAK:00207:00318
GGGCCAGATACATCCGGGACTTCC

>D8PAK:00208:00317
TTGTATCGCACGATACACTTCACC

>D8PAK:00208:00320
AACGTAATTGTACTCTAAAATACA

>D8PAK:00208:00339
AGAAACTTTGTGCCCTAAGATACA

>D8PAK:00209:00318
CTCCAGATTGTAACTTGTCATACT

>D8PAK:00209:00323
TACCACATTGTATCCCAGTATACA

>D8PAK:00209:00332
AAGGGATTGTATCGTATAATACAT

>D8PAK:00210:00327
TGGCGATTGTAGCCTAACGCACAA

>D8PAK:00211:00306
CAGGACATTGTAGGGTAGAATACT

>D8PAK:00211:00331
TCCATGACTGTATTCAAGCTTACA

>D8PAK:00212:00313
AATATCACTGTATGCTAAGCTACT

>D8PAK:00213:00320
GAGGAATCTGTGTGCTAGCGTACA

>D8PAK:00213:00334
TTTCTATATGTAATTGGGGCTACA

>D8PAK:00214:00326
TTGTACCCTGGCATACAATCCTTT

>D8PAK:00214:00329
ACTTAAATTGTGTGCTAGGATACT

>D8PAK:00214:00330
AAAATAACTGTAGGCTATTACACA

>D8PAK:00215:00311
AACGAATCTGTGACATACCACACA

>D8PAK:00215:00336
ACGAGAATAGTAGCCTGCAGTACT

>D8PAK:00215:00339
GAATACTTTGTATGATGAATTACA

>D8PAK:00216:00329
TTGTATTAAGTGATACAATTTTGA

>D8PAK:00216:00349
GTTGCGACTGTGACCCTCGTCACA

>D8PAK:00218:00327
TTGTATCTCCACTTACAATTTCGT

>D8PAK:00219:00324
AAGCAATTTGTACGCTAAGATACA

>D8PAK:00220:00300
TTCATCATTGTATGCTGTGCTACT

>D8PAK:00220:00342
AGTCCAATTGTGGTTTGGGCCACA

>D8PAK:00220:00344
GGATAATTGTAATCTAAAGTACAC

>D8PAK:00221:00305
AATCCGACTGTATTCCATGCTACA

>D8PAK:00222:00316
CTTGAATTGTATCCCCAGTCACAA

>D8PAK:00222:00321
ATTATTATTGTATCACAAACCACA

>D8PAK:00222:00349
GCCGTCTTTGTGACCTGCATTACT

>D8PAK:00223:00322
CCTACCAGGACATCCATCCAGGCT

>D8PAK:00223:00328
AGCGGAATTGTACGCTGTACTACA

>D8PAK:00223:00336
GAAAAATTGTATTACGAAATACAC

>D8PAK:00224:00309
ATCTTATATGTGACTTGGAACACA

>D8PAK:00225:00316
CGGGCGATTGTATGCTCCGCCACA

>D8PAK:00225:00341
CCACTGATTGTAACCCGTAGCACA

>D8PAK:00227:00307
ACAGTAAATGTAATCTAACTTACA

>D8PAK:00228:00305
CTCAAGACTGTGATCAGGGCTACT

>D8PAK:00229:00337
GAAATCTATGTAATCTAGGCTACA

>D8PAK:00229:00339
AAAGAAAATGTGCTCTTGAATACA

>D8PAK:00230:00311
ACTAGATTGTACCATGGCATACAT

>D8PAK:00230:00313
GGCCTATTTGTACTCCACGACACA

>D8PAK:00230:00321
ATTTACATTGTAATCCAAGACACA

>D8PAK:00232:00323
AACCGAATTGTGTTATGCATCACT

>D8PAK:00235:00309
GCTGCGAATGTGCCGTAGACTACA

>D8PAK:00235:00313
CATACACCTGTGACTTGCAATACA

>D8PAK:00236:00317
CCGATTGTGACACACCCCACAATC

>D8PAK:00236:00322
ATAGCTGTCTCATCCTCGGTGGAA

>D8PAK:00237:00302
CGTCACATTGTGACGTGAGACACA

>D8PAK:00237:00306
ACATAAGTGCATCCGGGTTTTTGA

>D8PAK:00237:00329
CTGTAGTCTCGAATACAATTACGC

>D8PAK:00237:00332
TTTTCAAATGTAGTTTAAGTTACG

>D8PAK:00237:00341
TTGTGACCCAGGTCACTCTTTCAC

>D8PAK:00238:00316
AACAATATTGTGATTTAGGATACA

>D8PAK:00238:00344
TTGTGGCACTGGATACAGTTCCAA

>D8PAK:00239:00319
TTGTGATCTGGAGCACACATTCTC

>D8PAK:00240:00305
ATCTTAAAAGTATCATACAATACA

>D8PAK:00240:00310
CTCTGGAATGTATTGAGGAACACA

>D8PAK:00240:00320
ACCTCAATTGTGTGATGCCCCACA

>D8PAK:00241:00323
GAGGAAATGTATTCAGCGCTACGC

>D8PAK:00241:00328
CTTGCAATTGTAATCTGAACCACA

>D8PAK:00241:00338
GCCCGGAATGTGACTTGGCATGCA

>D8PAK:00243:00327
CGAAAGATTGTAATCCCTCATACT

>D8PAK:00244:00314
TTGTGGTCTTCGCCACAATCCGAT

>D8PAK:00244:00328
TACTTAATTGTAGGCCGGAATACC

>D8PAK:00244:00335
AAAATTGTATTCTACGTCACAATC

>D8PAK:00245:00307
GTGTGTCCTAGGCTACACTTAAAA

>D8PAK:00245:00309
CGGACCATTGTGACCTGTACCACA

>D8PAK:00245:00328
ACTTTCAATGTAATCCCGGTTACA

>D8PAK:00246:00311
GTTATATTTGTGGTCTGCAATACT

>D8PAK:00246:00319
GATGAATTTGTGTCCCCGCTCACA

>D8PAK:00246:00340
GATTACATTGTGGCCTCAATTACA

>D8PAK:00246:00347
TATTCAAACGTATCTTGGGTTACA

>D8PAK:00247:00327
CAGGAATTGTGAGCGGTAATACAG

>D8PAK:00248:00302
TTGTAGTCGACGACACAATTTAGA

>D8PAK:00249:00300
AATTGTCCCTCATCCGTTATAATA

>D8PAK:00200:00354
CACTTAAACGTATTGTAGCTTACA

>D8PAK:00201:00361
CGCCCGATTGTATTTGGGCTTACA

>D8PAK:00202:00375
ATCGAATCTGTATGCCCTAATACA

>D8PAK:00202:00393
GAATAACATGTAGCGTAACATACA

>D8PAK:00203:00358
TTCATATTTGTATGCAGGAGTACA

>D8PAK:00203:00367
GACAACTCTGTGTCTTGAACTACA

>D8PAK:00203:00376
CACTAAAATGTAACCTATGCTACG

>D8PAK:00203:00396
TCGCAGAATGTACTCTCGCACACA

>D8PAK:00204:00351
GGCCCTTTTGTATTCCGGCATACT

>D8PAK:00205:00358
ATGTATTCGAACTTACAATTATCA

>D8PAK:00205:00371
TACCTAATCGTAGTCCAGGCTACG

>D8PAK:00205:00399
TATTTAACTGTAGTCCGGGGCACA

>D8PAK:00206:00376
GATCCGTTTGTACTCCTTGCTACA

>D8PAK:00206:00383
AAATTGTAGGCTGGGTTACTATAG

>D8PAK:00206:00395
ATTTAAATTGTAACCCCGTACACA

>D8PAK:00207:00354
TGTCGAATTGTACGCTAGGTCACT

>D8PAK:00207:00377
TTTCTGAATAGTAGTCCAGATTAC

>D8PAK:00207:00388
AGTTCGCCATCCTGAGTAAACCCT

>D8PAK:00208:00356
AGTTAAACTGTAACCTAGATTACT

>D8PAK:00208:00370
GCCCGACCTGTAAGACAGCCTACA

>D8PAK:00209:00355
ATTTTGATTGTATCTCAAGGCACT

>D8PAK:00209:00359
GATTGGATTGTAACTACGATTACA

>D8PAK:00210:00369
ATGTAACACAACATACACTTTGCC

>D8PAK:00210:00379
CATCAATTTGTAGCACAAGCTACG

>D8PAK:00213:00380
CCTCACCTGCATCCCATTCGTCTC

>D8PAK:00214:00387
AATCCGAAAGGTGACCCGTCATAC

>D8PAK:00214:00390
CCTTCATTTGTGGCCCATAATACA

>D8PAK:00215:00356
TCAAAAGTGTGCTCCACACCACAA

>D8PAK:00216:00354
CTATGCTTTGTAGCACAGGCTACG

>D8PAK:00216:00371
TGTTATATTGTAAGCCATGACACA

>D8PAK:00216:00398
TTGTATTGTAGCTTACATTTCTGG

>D8PAK:00217:00374
TTTAGAAATGTGTCCTACGCTACT

>D8PAK:00217:00384
AAGAGTGTAACACAGATCACATTT

>D8PAK:00218:00352
TGTCTAATTGTACTCCGCCTCACA

>D8PAK:00218:00367
CCGTTAATTGTAATCTGACTCACA

>D8PAK:00218:00370
CCGACATTTGTATGCTTGAATACA

>D8PAK:00218:00378
GTGCATATTGTGTGCCAGCCCACA

>D8PAK:00218:00379
TTGTAGGCCTGCATACACTTCATA

>D8PAK:00218:00391
CTCGAGATTGTGATTCACACTACA

>D8PAK:00218:00395
CTGTGTTCTACACTACAATTCATC

>D8PAK:00219:00352
ACATGACTTGTACGCTGGACTACA

>D8PAK:00219:00354
AAGTGAATTGTATTGTAGAACAAC

>D8PAK:00219:00360
AGAAATTTTGTATTCTAGGTTACT

>D8PAK:00219:00364
CGGCCTTTGTATGCTAGATCACAT

>D8PAK:00219:00394
ATAAAGCAGCATCCGTTAAGGTTC

>D8PAK:00220:00353
ATAAAATGTGTTGTACAATACGAA

>D8PAK:00220:00358
CTATACATTGTGCCATGGAACACT

>D8PAK:00220:00375
TTGTAGTCCAAGACACTATCCGGC

>D8PAK:00220:00380
ATGAAGTGTAATGTACGTTACAAT

>D8PAK:00221:00376
TGAGCAAAAGTGGTCTATAATACA

>D8PAK:00221:00393
TAATCTGTAGCACAGAATACAATC

>D8PAK:00221:00398
GGCTCAAATTGTATTCCGGATCAC

>D8PAK:00221:00399
ATCCCGATCGTGCTCCACCATACA

>D8PAK:00222:00362
TTGTATTCCAGGATACAAACCTCG

>D8PAK:00223:00359
TTGTAAGCTGTGATACATTATGCC

>D8PAK:00223:00381
TATGAGTTTGCATGACAGACTACA

>D8PAK:00224:00365
ATTGTGATTGTAGGGTGCATTACA

>D8PAK:00224:00385
CCTGTATCTGTATCCTGCGTTACA

>D8PAK:00224:00394
ATATAATATGTATCCCGGACTACA

>D8PAK:00225:00396
CCCCAGAATGTATTCTAGACCTCA

>D8PAK:00226:00352
TCGTCGACTGTGGGCTATAATACA

>D8PAK:00226:00360
TACAGAATTGTAACCTGCGCCTCA

>D8PAK:00226:00389
AATACATAAGCATCCTAAGCTTGC

>D8PAK:00227:00360
TTTGGCGTTTGTAGCCGGGCGTAC

>D8PAK:00227:00369
AAGACGATTGTGACCTATGGCACA

>D8PAK:00228:00357
TTTAACTTTGTAGTTGACGTTACA

>D8PAK:00228:00398
GTCTACCTTGTATCCTGCGATACA

>D8PAK:00229:00354
AACTTTGTATCGTAGCACACAGTT

>D8PAK:00229:00375
ACAGTGTGACCTGGCATACAATTG

>D8PAK:00229:00390
CTTTTTTTGTGACCTAGCCCACAT

>D8PAK:00229:00394
TAACTCTTTGTAGCATCCGCTACA

>D8PAK:00230:00389
GTGTGACCTGGCGTACAATTTTCC

>D8PAK:00230:00398
AATCCAAACGTACTCCAAGCTACA

>D8PAK:00231:00354
GAAAACTTTGTGGCGTAGCACACA

>D8PAK:00231:00373
TCCTAGTTTGTGGTGTCGGATACA

>D8PAK:00232:00366
GTCAATTTTGTATTCAGGACCACA

>D8PAK:00232:00379
TCCGGAATGTATCCCCTACTACAC

>D8PAK:00232:00380
CTTCTAATTGTGTCCTGGGGCACC

>D8PAK:00232:00385
TTGCGAACTGTATCGCAGTCTACA

>D8PAK:00232:00396
ATAATCTTTGTAGCCCCGGTTACG

>D8PAK:00233:00363
TCGCCAAAAGTGAGCCAGCCTACA

>D8PAK:00233:00367
TTTAAGAGTGTGTTGCACGCTACA

>D8PAK:00233:00397
TAATCTGTACTCCAGGTCACATTT

>D8PAK:00234:00355
TTTTTGTTTGTAGCGCGGCCTACT

>D8PAK:00234:00359
GGTTTAACTGTATGATAGCTCACA

>D8PAK:00234:00367
AAAGTAATTGTGTTCTAACTCACA

>D8PAK:00234:00372
TTGTGTGCTGTAATACAACTTCGG

>D8PAK:00234:00392
AAACGAACTGTACTCCTAGGCACA

>D8PAK:00236:00363
GACGATTGTAATACGGACTACGGT

>D8PAK:00236:00376
ATGTAAATCGTATTCCAACGTACA

>D8PAK:00236:00399
TCTGCCAATGTATTCTGCCTTACA

>D8PAK:00237:00352
TTGTGTGCTGTGACACAATTAGTA

>D8PAK:00237:00369
CAGTGAATGTAAGCCAGCATACTC

>D8PAK:00237:00373
CATCTGAATGTACGCAGGGCTACA

>D8PAK:00238:00354
TTTTTCCTCCATCCCGCCCCATCG

>D8PAK:00238:00364
TTAGAACACTGTATCCATAATACA

>D8PAK:00239:00372
TGTCACTATGTAATTTAGAATACA

>D8PAK:00239:00396
TCCTGAACTGTACTCTGGCATGCA

>D8PAK:00240:00380
TGCAGGATTGTAGTATGGACTCCA

>D8PAK:00240:00391
GTTGGAATTGTAGCCTGCACTTAC

>D8PAK:00240:00393
AACAACACTGTAACCTATGATACA

>D8PAK:00241:00350
TTGTATGCTACATTACAAAATTCC

>D8PAK:00241:00360
TGAAAGATTGTACTGAGGGTCATT

>D8PAK:00241:00381
ATATAAATTGTGCCTTAACATACT

>D8PAK:00241:00389
GAGCTGATTGTGTGCTGTCGTACA

>D8PAK:00242:00355
ACTTTACTTGTACTCTAGGTTACT

>D8PAK:00242:00358
TTGTGATCCAAGATACAATACAAT

>D8PAK:00242:00359
CGTCGGATTGTAACCTACGATACA

>D8PAK:00242:00388
GAATGAAATGTATGCTGGCCCACC

>D8PAK:00242:00398
GTAGGCTTTGTGACGTGTATTACA

>D8PAK:00243:00361
TTAGTACATGTATTCTGTCCTACA

>D8PAK:00243:00379
TTGTGTTCTAGATTACATTTTTGT

>D8PAK:00243:00390
AATTGATTTGTGACATACGCTACT

>D8PAK:00243:00396
TCGTAATCTATGTCCATACCTACA

>D8PAK:00244:00371
CCGCGATTTGTATTCCATATTACA

>D8PAK:00245:00352
AAATCTGTACGCTAGATTACAGTC

>D8PAK:00245:00376
TGATTGTAGCATCCACTACATTGT

>D8PAK:00246:00383
CGTGGCATTGTAATACCGCCCACA

>D8PAK:00246:00394
GTTACCACTGTGGCCCCCGCTACT

>D8PAK:00247:00354
TTGACCTTTGTGTCCTACAGTACA

>D8PAK:00247:00365
CAACCGATTGTGTCCTGTGTTACG

>D8PAK:00249:00356
TTGGGATTGTGCCACACGATACAA

>D8PAK:00249:00365
[truncated: 1,809,522 more chars]
