# Supplementary material for: Determination and Dissection of DNA-Binding Specificity for the Thermus thermophilus HB8 Transcriptional Regulator TTHB099
Source: Int J Mol Sci. 2020 Oct 26;21(21):7929. doi: 10.3390/ijms21217929 (PMC7662524; doi:10.3390/ijms21217929)
Supplement: Supplementary file 1 [file ijms-21-07929-s001.zip › Data S2.txt]

>UDNZI:00012:00005
CTAAAGAGTGTAGGTCAGAATACA

>UDNZI:00019:00004
AACACAATTGTACGCCCGACTACA

>UDNZI:00028:00030
GGCAGAAAAGTAATCCACGGTACT

>UDNZI:00044:00025
TTGTACGCTGCAGCACAATTCCGG

>UDNZI:00020:00074
AAGTCGATTGTACCTGGTGCTACA

>UDNZI:00035:00079
TTTATGATTGTATCATGTGACACT

>UDNZI:00041:00098
GCAACAATTGTGTGCTAATACACA

>UDNZI:00017:00156
CTGCAGTTTGTGTTCTGCAATACA

>UDNZI:00022:00154
GACGAAAAAGTGTTCTGCAATACT

>UDNZI:00027:00188
ATTTTGATTGTAAGCCTGCCCACT

>UDNZI:00044:00176
AAAACTGTGAGCTGCATCACATTA

>UDNZI:00015:00201
AAGATAGTGCTTCAAATTACAAAC

>UDNZI:00006:00284
ACGTGAGTGCATCCGCACTTTGTA

>UDNZI:00049:00283
TATGACATTGTAATTCACAATACA

>UDNZI:00030:00349
GTAGAGATTGTGTCCCATGATACA

>UDNZI:00045:00326
CTGTATTCTAGAACACAAAATAAC

>UDNZI:00046:00335
AGCTGGTAACCATCCGTCTCTAAT

>UDNZI:00048:00313
GGTCTACCATCATCCTTTGCTTAT

>UDNZI:00011:00371
CAGTGCGAATGTATGTCAGCCTAC

>UDNZI:00046:00365
TTTTAGTCTGTAGCCACGACTACA

>UDNZI:00029:00447
GCTAACTTTGTGCCCCACAGTACA

>UDNZI:00032:00429
CAATGAACCGTGCCTTAGACTACA

>UDNZI:00039:00426
TTGTGACCCATCTCACAATTGGAG

>UDNZI:00013:00459
CTTTATTATGTGCACTGCACTACA

>UDNZI:00023:00477
TGCCTAATTGTGATGTACGTTACA

>UDNZI:00031:00480
TTTTGGATTGTGCGCCAAACTACA

>UDNZI:00041:00578
AAGCTAATTGTACTCCAGCCCACC

>UDNZI:00048:00600
GAGCCAAAGTCATCCTCGGCTAGG

>UDNZI:00034:00716
GAATTCACTGTATTCCCAGTTACA

>UDNZI:00059:00033
TAGTAATTTGTGTCGTAGATCACA

>UDNZI:00099:00013
ATTTGAAACTGTGGCCGCGATTAC

>UDNZI:00067:00058
TAGAAACTGTATCTCACACCACAA

>UDNZI:00071:00068
TTGTATCATGTGCTACAATTTAAC

>UDNZI:00054:00129
AAGCAGATTGTAAGCCGTAATACT

>UDNZI:00061:00122
TTCTAAATTGTATTCTCGCCCACA

>UDNZI:00064:00111
CTCTTAACTGTATCACATATCACA

>UDNZI:00079:00120
TAAGAGATTGTACTCATGGTTACA

>UDNZI:00095:00137
TAGAACATTGTATTCTTCAATACA

>UDNZI:00064:00158
TGAAAAGTGTATCTCGTAATACAA

>UDNZI:00074:00191
TTCTTAATTGTAGCCTGAGACACT

>UDNZI:00060:00232
GCACCAACTGTATTCGACGCTACA

>UDNZI:00070:00213
TTATTGATTGTATTCGGCGTCACA

>UDNZI:00071:00203
TTGTATCCCATCATACAATCCTAT

>UDNZI:00074:00281
ATGTATTCCAGGATACAAATGTAC

>UDNZI:00082:00292
CCGAAGATTGTGCCCCAGCCTACA

>UDNZI:00083:00293
CCTTTAACTGTATTTTACGCCACA

>UDNZI:00084:00283
TATTACATTGTGATGTATGCCACA

>UDNZI:00089:00253
ATACACATTGTGACCCGGAACACA

>UDNZI:00099:00273
CGAGGAATTGTGACGTTGCATACA

>UDNZI:00050:00341
ATATGAACTGTAGCGTGCGACACT

>UDNZI:00053:00338
ACCCAATCTGTGGCCCGTAATACA

>UDNZI:00066:00331
AGGAAGTTCGTATTCTAGGTCACA

>UDNZI:00073:00322
CCTGTATCTGTATCAGAGGATACA

>UDNZI:00077:00348
ATCTAAAGTGTATCGTAGCCCACA

>UDNZI:00064:00368
TGCTTTGTATTCCAGCTTACAGAT

>UDNZI:00064:00374
ACCGAGATTGTGACCCACCCTACA

>UDNZI:00072:00382
GTCAAAACAGTGGCCGGTGCTACA

>UDNZI:00077:00380
TGACCGACTGTATGCCACAATACC

>UDNZI:00057:00423
GACTTAATTGTGCCTTAGACTCCA

>UDNZI:00075:00412
ACTGTGAGGTCATCCATATTTGTT

>UDNZI:00084:00404
TTTTACATTGTAGTGTACGTCACT

>UDNZI:00096:00425
ATCCTTTTGTGCCCTAGCTTACAA

>UDNZI:00068:00482
CAGCACTTTGTATTGTAAAGTACA

>UDNZI:00095:00481
TATCGGACTGTATGCGAGCATACT

>UDNZI:00069:00503
TTGTAAGGTAGACTACATTCTCGC

>UDNZI:00075:00509
GTCTCTTTTGTATGCTCACATACA

>UDNZI:00050:00587
TTTTTCCTTGTACTCTGGGATACA

>UDNZI:00093:00609
GCTATAATTGTATTGCCGCATACA

>UDNZI:00095:00617
TTGTAAGCGAGGCTACAAAGTCTC

>UDNZI:00057:00704
TCTCGAATTGTACTCCATACCACT

>UDNZI:00068:00742
GAAAACTTTGTGGCGTAGCACACA

>UDNZI:00093:00707
GCGGCAATTGTGTCCTGGACTGCT

>UDNZI:00094:00724
ACGCAGATTGTATGATGGATGACA

>UDNZI:00096:00730
AATTAGAATGTGTCGGCGCCTACA

>UDNZI:00057:00751
ATTTTCATTGTAGGTCAGAACACA

>UDNZI:00057:00760
TTGTACTTTGTGATCTACACCACT

>UDNZI:00082:00770
TTGGAGTTTGTGCCACAGGATACT

>UDNZI:00084:00756
ACTAGGACTGTAGTCTAGGGCACT

>UDNZI:00084:00768
GATACGAGTGTAATCTAACATACA

>UDNZI:00092:00762
TTGTACTGTAGCCTACACTTACCT

>UDNZI:00096:00788
CTGTAATGCAGGATACAATTTGCG

>UDNZI:00066:00818
CTTTGTATCCAGGGTTACTATTCC

>UDNZI:00100:00028
GTTAGATTGTGGCGCACAATACAC

>UDNZI:00105:00027
TTGTGTCCTGCGTCACAATTCGGG

>UDNZI:00115:00041
TTGTAATCTAGAATACTAACTGGA

>UDNZI:00102:00077
AATACAATTGTATTCACGGTTACT

>UDNZI:00104:00089
TTGTAATCCACAGTACATTTCTGT

>UDNZI:00134:00052
TGCGCATTTGTATTCCGAGTTACA

>UDNZI:00143:00063
CCATTATTTGTGACCGCGACTACA

>UDNZI:00149:00076
TTAAGACTGTATCCAGGACCACAT

>UDNZI:00116:00218
CCATAGGCGCCATCCTGCTAAGCA

>UDNZI:00118:00237
TGAAATGTACGCCGCAATACAGTT

>UDNZI:00100:00263
GAGATTGTGCCCTGGAATACGGTT

>UDNZI:00137:00264
ATGAGGTTTGTATTTGGGAGTACA

>UDNZI:00148:00276
CTCAGAATGTAGGGTGGGATACAA

>UDNZI:00107:00329
CGCAGAAATGTAGGCCGGACTACT

>UDNZI:00145:00348
AATGACTATGTAGTGCAAACTACA

>UDNZI:00106:00361
GCCCATTGTGTATCCCTGGTTACA

>UDNZI:00108:00367
AAATCGAGTGTAAGCTGGATTACA

>UDNZI:00101:00425
TTACTAATAGTAGCCTGGACTACA

>UDNZI:00104:00427
CTAGACGTCCCATCCCGATGCTAT

>UDNZI:00107:00438
AGTCATATTGTATTCTTGGCTACA

>UDNZI:00132:00443
TATGACACTGTATCACAGGCTACG

>UDNZI:00141:00441
TAAGTTAGTGTAGCCTGTAATACA

>UDNZI:00125:00457
ATAATAATTGTGAGGGGGAATACA

>UDNZI:00101:00504
ATCAAGACTGTAAGGTGCGCCACT

>UDNZI:00133:00549
GCAAGGATTGTATGCTGTCCTACA

>UDNZI:00146:00515
TGATTGTGACCTAGATTACGTTTT

>UDNZI:00132:00596
CGCGAAAAAGTAGGCTAGAACACA

>UDNZI:00137:00573
TAAAACTTTGTATCACACGCTACT

>UDNZI:00141:00578
GTCTCCTTTGTAACATGCACTACG

>UDNZI:00148:00555
GAACTTCTATCATCCGTACTATTT

>UDNZI:00102:00609
TTTTCCAATTGTAACCGGAATCAC

>UDNZI:00105:00669
CCGGCTCATCCGGGCTAAGATATA

>UDNZI:00146:00722
AAATTGTAGCTGTGACTACACGTT

>UDNZI:00146:00749
ATTTAAACTGTGACCTGGATCCCT

>UDNZI:00148:00706
TGCATGACTGTGCTCCGTGTTACA

>UDNZI:00122:00785
GAGTATCCTGTAGCCTGTGTCACA

>UDNZI:00142:00761
CTGACTATTGTGTTCCTTAATACA

>UDNZI:00109:00905
GCCTTAAATGTATTCTACATCACA

>UDNZI:00144:00929
TCCACTTTGTGCCCCAAGTTACAA

>UDNZI:00143:00996
AAAGCCCACTCATCCTATCTTAAG

>UDNZI:00154:00042
AAACCAAATGTATTCCAGACCCAC

>UDNZI:00155:00049
ACGTTAATGTATGCCAGCCTACAA

>UDNZI:00163:00029
CCCAAAATTGTGTCCTAACGTACA

>UDNZI:00175:00038
CTCGGTAATGTAATCTACGTCACA

>UDNZI:00176:00024
AATAAGAATGTACTATGCACCACA

>UDNZI:00179:00014
ATTGATTTGTAACCTGGAACACAT

>UDNZI:00180:00024
CGTACCATGTCATCCTAATCCTTA

>UDNZI:00180:00026
TGGAAACTGTGGCCAGGATTACAC

>UDNZI:00185:00014
CCTGTAAATGTGACTACGTATACT

>UDNZI:00197:00011
GGACCGAAAGTGCTCTAGATCACA

>UDNZI:00155:00061
AACGACAATGTAATCTAGATTACT

>UDNZI:00155:00063
TTCTGCTTTGTAGCCTGCCTCACA

>UDNZI:00182:00058
CCGTACATAGTATCGCAGAACACA

>UDNZI:00185:00063
GTCCTAATTGTAATATGGACTACC

>UDNZI:00168:00109
GCGTATATTGTAGTACAGGCTACA

>UDNZI:00158:00185
GTCCCGATTGTAGCCCACGCTAAT

>UDNZI:00159:00189
TCGACGACTGTGGTCCACGACACA

>UDNZI:00165:00191
TAAAATTGTAACCCATACTACCAA

>UDNZI:00167:00199
GTTACCTTTGTGTTCTGAACTACA

>UDNZI:00175:00159
GTATCGATTGTAGTGTATACCACA

>UDNZI:00179:00152
CTGTTTTGTGTACGCTGGGCTACG

>UDNZI:00197:00173
TTCCAACTTTGTAACTTACCATAC

>UDNZI:00187:00201
TCTCAATTGTATCCCATGACACAC

>UDNZI:00190:00202
CAATTGTAGGGCATCCTACAAACT

>UDNZI:00198:00213
ATCATGACTGTATCCCCGGACACT

>UDNZI:00157:00312
TTTTGTCGCCATCCTGCAGACCTT

>UDNZI:00198:00318
TTGTGCCCCAGGCTACATTTTTCA

>UDNZI:00181:00388
ATTGGAATTGTACGCTGCGCCACT

>UDNZI:00192:00359
ATTGTACGATCATCCTATTAAATG

>UDNZI:00163:00404
TCGTGTCCTAGGCTACAATCCCTT

>UDNZI:00167:00432
ATACTTTTTGTATGATATGATACA

>UDNZI:00189:00426
AACAACACTGTGCTCTGGGCCACG

>UDNZI:00152:00461
AATGAACTGTGATGTAGAATACAA

>UDNZI:00162:00499
CCTGCACTTGTAGTCCACGCCACA

>UDNZI:00164:00495
TCTGAGAATGTACTACAAGTCACT

>UDNZI:00165:00498
GAATTTTTTGTATGCTGGGATCAG

>UDNZI:00173:00478
AATTGGTTTGTGGTATGAATCACA

>UDNZI:00189:00468
TATCAAAATTGTGTCCTAATGCAC

>UDNZI:00190:00491
TCTCGCTTTGTAAGCCGTGATACA

>UDNZI:00153:00521
AGTCAAATTGTATTGCAACCCACA

>UDNZI:00178:00538
TTTTCAATTGTATTAACGCATACA

>UDNZI:00195:00501
TTATCGAATGTATCCTAGAATCCA

>UDNZI:00198:00505
TTGTGACCTGAACTACTAAATCAC

>UDNZI:00185:00577
GGATTGTATGCCCGGCTACTTTTT

>UDNZI:00185:00581
GTTCTCTCTGTAGTATAGCCTACA

>UDNZI:00186:00588
CCCAACATTGTATTATAGAATACT

>UDNZI:00187:00585
CAGTTGTCACATCCCGGCCGCACA

>UDNZI:00191:00555
GTCCGAACCGTATGCTGAGTCACA

>UDNZI:00170:00630
CTTACAATTGTGTCCCTCCACACA

>UDNZI:00189:00626
TTGTAAGCTAGCATACAAATATTC

>UDNZI:00197:00606
AAGCCCAATGTATTCTAGGATACT

>UDNZI:00151:00663
ATCAAGAAAGTAATCTAAATTACT

>UDNZI:00158:00680
ACCACGAGTGTAACGCAGGTTACA

>UDNZI:00175:00744
GCACGGAATGTATGTTAGCCCACA

>UDNZI:00181:00747
AATTTGTTTGTGTTCCAGACTATT

>UDNZI:00199:00704
GTAAAGATTGTATGGTATAGCACA

>UDNZI:00153:00787
TCGTAAATTGTCATCCACCTCACG

>UDNZI:00170:00770
TTACCGACTGTGTTATGGCATACA

>UDNZI:00174:00770
CATAAAAATGTGATACCCGCTACA

>UDNZI:00182:00762
CAGATTGTGTCCCAGCCTACGATG

>UDNZI:00193:00777
TATATTGTGGTCTGCCTTACAGTT

>UDNZI:00157:00846
TTGTATCGCATCTTACAGTCATGT

>UDNZI:00174:00821
ACGTAATTGTGGCGTGGCCCACAC

>UDNZI:00174:00846
TGAATATTTGTAGTGGGGATCACA

>UDNZI:00188:00815
GCCAGGAAAGTATGCTAGGATACC

>UDNZI:00161:00850
CAGTTGATTGTAATCCCCCATACA

>UDNZI:00170:00869
AATCGTTTTGTGTTCTAGGACACT

>UDNZI:00189:00885
CTTCCGATTGTGTCCTAGAACACT

>UDNZI:00183:00938
CTAGAACTGTATTCCAGAATACCT

>UDNZI:00187:00932
TAGAAGATTGTATTCTCTATCACT

>UDNZI:00189:00937
ATCAAATTGTAATCTCCACTACTT

>UDNZI:00173:00962
AATTAAATCGTAGCCCAAGATACA

>UDNZI:00175:00955
AATTTTGTGACCTGGAACACCTTT

>UDNZI:00182:00952
TGTATCTCAGCATACAATCGTGCT

>UDNZI:00191:01031
TACTGCATTGTGCTCCGAGTTACA

>UDNZI:00205:00015
TGTATCTTGTAGCGTGTAATTACA

>UDNZI:00206:00034
CTCCCAATTGTAGCTTCAATTACT

>UDNZI:00208:00045
GTAAACACTGTAGTGAAGAATACA

>UDNZI:00212:00004
ATCCAAATTGTATGGTAGAGTACG

>UDNZI:00216:00038
CTGACGATTGTAACTGGGGGCACA

>UDNZI:00219:00030
GTACAAACTCGTGCACTCGCTTAC

>UDNZI:00225:00014
ATGACGAGTACTATCGTCACTACA

>UDNZI:00229:00006
TTAATTGTGACCTAGCTTACTAAT

>UDNZI:00230:00031
TAACTGTAGCCTAGAATACAATTA

>UDNZI:00230:00039
AAGCCGGTCGTAACCTGAACTACA

>UDNZI:00231:00008
AATAATGTATTCCGGACCACATTC

>UDNZI:00234:00010
TTGTGTCATAGAATACAATTTAGC

>UDNZI:00241:00042
GATTGGTTTGTAGTCCCGGCTACT

>UDNZI:00242:00014
AAAACACTTGTGTCCCAGCTTACA

>UDNZI:00245:00028
ATTGTAAATGTAAGCTGGGTCTCA

>UDNZI:00248:00024
GCGGGCAATGTGCCCGGTAATACA

>UDNZI:00213:00059
ATCTGCATTGTATTCCATCATCCA

>UDNZI:00226:00066
TTCAGGTCTGTATTCCAGACTACA

>UDNZI:00227:00076
ATCCTAAACCCATCCAGTTAGACG

>UDNZI:00229:00052
TTGAAAATGTGCTATAGCATACAA

>UDNZI:00234:00083
GTGTATCCTGGGATACAATGTTGA

>UDNZI:00236:00058
CCCGTTCTACCATCCTATATTCCG

>UDNZI:00215:00101
GAGTGTATGCCCAGTTACAATTAT

>UDNZI:00235:00144
CGGAAAATGTAAGCTGTAATACAG

>UDNZI:00238:00103
ACAAGGATTGTGTTCTGTACTACA

>UDNZI:00243:00117
ATCTGCCATCCAGAATCCGCGCTA

>UDNZI:00214:00198
AACAAATTGTATTTCCCGATACAC

>UDNZI:00238:00183
TTGTAGTATGCGCTACATTGTCCG

>UDNZI:00249:00178
TCGGCATTAGTGGCCTAGGGCACA

>UDNZI:00241:00238
TATAGCATTGTGCCCCTCGCTACT

>UDNZI:00214:00269
TTGTATGCGAAGATACATTCATGG

>UDNZI:00221:00299
ACTCAGATTGTATCCCCGATTACT

>UDNZI:00229:00255
TTTTACAAATGTATCCCGTCTTAC

>UDNZI:00243:00269
TTGTGTCCCCCAATACACTTGATA

>UDNZI:00246:00285
TTGTATTCTGCAACACAGACCGGT

>UDNZI:00222:00333
GCTCAAACTGTGTCGCATGGCACA

>UDNZI:00246:00339
TTCGCATCTGTATCCTCCGCTACA

>UDNZI:00228:00388
ATTTGAACAGTGTCCCATCATACA

>UDNZI:00229:00355
AATTAGACTGTATCCCGCAGCACA

>UDNZI:00243:00372
TTGTAACTCAGCATACAAATTCTG

>UDNZI:00215:00442
ATTTTTATTGTATGCGGGGCCACT

>UDNZI:00219:00439
CAGGCAAACGTGACCCCGGATACA

>UDNZI:00210:00477
TAACAAATTGTATTTTGCGCTACC

>UDNZI:00227:00488
TTACAATTGTATCCCACGATAACA

>UDNZI:00243:00474
AATCGCTTCGTGTTCCATAATACA

>UDNZI:00200:00542
TTTTAGATTGTTACCTAGGATACG

>UDNZI:00241:00516
ATTCACTTTGTATCGCGTGTTACA

>UDNZI:00236:00593
TATGAGACTGTATCCACGACCACT

>UDNZI:00243:00552
TTCCTCTGTGTGTCGTGTAATACA

>UDNZI:00249:00555
GATCGTATGCCAACTTACAATTCA

>UDNZI:00221:00646
CGATACATTGTAATACACCCTACA

>UDNZI:00208:00662
CCTCATATTGTAAGGTAGCTTACA

>UDNZI:00233:00697
TTGTACTCCACGGCACAGTTTGCA

>UDNZI:00236:00654
CATCAGAATGTAATGGGTGATACA

>UDNZI:00247:00679
ATACAAACCGTACGCTAGGCTACA

>UDNZI:00205:00747
AATACAACTGTGCTTTGGGGTACA

>UDNZI:00225:00725
CTCTTAAGTGTGACTTAGGATACG

>UDNZI:00219:00783
AAATTCTATCATCCCGCTTGTTTA

>UDNZI:00221:00764
CGGACCTTTGTATCTTAGAGCACA

>UDNZI:00221:00786
GTTTCTGTAGGCTGCACCACAATT

>UDNZI:00236:00809
TCAACTGTATGTCAGACTACAATT

>UDNZI:00223:00861
TGTGCGTTTGTGGTCTAGGCCACT

>UDNZI:00230:00887
CTCGCGTTTGTAGTCGGCCATACA

>UDNZI:00221:00943
AGTCTATTGTATTCTAGCGTACAG

>UDNZI:00234:00924
TTTGAAAGAGTATGCTAGTATACA

>UDNZI:00217:00978
ACAGTAACTGTATTACATCCCACA

>UDNZI:00228:00995
GTGTAGCCCAGCGTACAATTTCCG

>UDNZI:00242:01031
TTGTATGCTGGGATACAAACCCAC

>UDNZI:00222:01062
CTGTAAATAGTATACCAGGACACA

>UDNZI:00238:01063
TTGTGTGCTAGCATACTAATACAG

>UDNZI:00251:00032
CCCCTGAATGTATTGGAGGCTACA

>UDNZI:00253:00040
AAAATGAACGTATGCTACGTTACA

>UDNZI:00254:00030
CCGCTAATAGTAGTTCAGGCCACA

>UDNZI:00280:00035
TTGTATCCTTGACCACATTTCCCT

>UDNZI:00292:00044
ATGTAATACAGGCTACATATTCCC

>UDNZI:00299:00020
TATAATTGTATCCCATGTCACATA

>UDNZI:00256:00079
GCTAAGATTGTCGCTTGGCTCACA

>UDNZI:00272:00063
CTCCCGAATGTGATCTAGGTCACA

>UDNZI:00259:00189
CCGATCAATGTGCCCTACGACACA

>UDNZI:00270:00162
AAGTAGGCTGTGCTACATTTCACG

>UDNZI:00274:00178
CTAAAATAAGTGGCGTGGACTACA

>UDNZI:00289:00175
TTTCAAATAGTGTCGTGCGCTACA

>UDNZI:00256:00233
GTGACTATGTAGTCCAGGCTACCA

>UDNZI:00263:00234
TCGTCGACTGTGGGCTATAATACA

>UDNZI:00268:00220
TAATAGATCGTGCTATAGGTTACA

>UDNZI:00275:00206
GAGGACTTTGTATCTCAACTTACA

>UDNZI:00275:00254
TTTTTGTTTGTAGTACGTGCCACA

>UDNZI:00282:00257
TTTGACTTTGTATTCCAAGACACC

>UDNZI:00289:00285
CGGTCGTTTGTAGTATGAACTACA

>UDNZI:00254:00319
CTTGAGTTTGTAGCCCTGCCTACC

>UDNZI:00257:00349
TTGTGCCCCACGCTACATTCGTTA

>UDNZI:00263:00435
AAACTACATCCGTTGAGCGAATAC

>UDNZI:00284:00431
TGATAGATCGTACCCTACGATACA

>UDNZI:00295:00401
AACAAAATGTGTCCTATATTACAT

>UDNZI:00255:00458
TTGTAGGCTAGGCCACAAACCTCC

>UDNZI:00267:00480
CTGTATTCCCACATACAATTTCTT

>UDNZI:00262:00503
TTGTAGGCTGGCTCACCATTCGCG

>UDNZI:00269:00533
CGAGTCACTCATCCGCTCTAGCGT

>UDNZI:00270:00522
TCGAAGTATGTAGCGTGTGTTACA

>UDNZI:00289:00501
AAGTGACTGTATGCCAGAACACAA

>UDNZI:00250:00561
TATTAGATTGTGGGATACCATACA

>UDNZI:00257:00559
TTGTAGTCCACGACACTATTCTTG

>UDNZI:00266:00599
TATTGAACTGTACCCTAGCACACA

>UDNZI:00297:00578
GTGTATGCGGGAATACTATTTCAT

>UDNZI:00262:00622
AATTATGTAGCCCACAATACAAAC

>UDNZI:00299:00605
CATATTGTATCCTGGGTTACAATA

>UDNZI:00275:00680
AAAATTGTGCCGTAGCGTACCATA

>UDNZI:00277:00650
TAGAAACTGTGCCCTAGCCCACAA

>UDNZI:00286:00653
GTGTAGAATGTAGTTGCTAATACA

>UDNZI:00290:00678
TTATAATTGTAACCAACAATACAT

>UDNZI:00252:00727
CCGGTAATTGTATTCCTGCCTACC

>UDNZI:00261:00721
CGCACAATTGTAGCGTGGCATACA

>UDNZI:00262:00733
AACTGATTTGTATGCTGGACAACA

>UDNZI:00275:00751
ATCGTCATTGTGTTTAGGAATACA

>UDNZI:00292:00784
TCAAATCTTGTAGCCTGACATACA

>UDNZI:00254:00810
TTCTGACTTGTAGCCAGTCATACA

>UDNZI:00293:00823
AACTTAGTGCTCCAGACCACAATT

>UDNZI:00298:00814
GCCACAACTGTATCCCCCCGTACA

>UDNZI:00260:00899
ATCGGCGATGCATCCAGGGTTTCC

>UDNZI:00270:00854
ATTATGACTGTAACCGGTATTACA

>UDNZI:00272:00890
TAGTATCGTACGCTACACTTTTTT

>UDNZI:00284:00882
GACAGACTGTAATTCAGAATACAC

>UDNZI:00265:00944
GAGTGTATTCTAGACTACGTTTCA

>UDNZI:00281:00922
TTGTATGCCGGGCTACATTTATAT

>UDNZI:00275:00969
ATGTGTCCCGGGATACTATTGACT

>UDNZI:00284:00996
TCTTGCATTGTATTCCACATGACA

>UDNZI:00291:00976
TTTATGACTGTATCTCAGAGCACA

>UDNZI:00263:01010
TATGCAATAGTGACGTGTGCCACA

>UDNZI:00282:01014
AGACCATTGTGACTTACATTACTT

>UDNZI:00284:01040
TTAAGTGTATGCTGGGACACAATA

>UDNZI:00250:01103
TTGTATGTTAAGTTACAGTTTATG

>UDNZI:00256:01126
TTTCAAAGTGTATGGTATCCCACA

>UDNZI:00265:01130
TTCAGCACTGTAATATGCGCTACA

>UDNZI:00275:01108
ATTTCAATTGTGGTCCACTACACA

>UDNZI:00317:00008
TTCCACGCACCATCCGAGACTGAC

>UDNZI:00320:00022
TTGTATTCTAAGTTACTATTCACT

>UDNZI:00324:00006
GAGATCGTATGCGGGGGCACAATT

>UDNZI:00331:00016
ATAGAGACTGTATTCTCACATACG

>UDNZI:00312:00077
TTGTATTGTGGGTTACGGTTTATC

>UDNZI:00300:00125
TTCTTAATTGTAGCCTGAGCTACA

>UDNZI:00311:00135
TCATTATTTGTGCCGTAAGATACA

>UDNZI:00337:00116
TCACTATTTGTAACATGGGACACA

>UDNZI:00344:00145
GCCTCAATTGTATTCCATGACTCA

>UDNZI:00300:00190
CATAATATTGTATCGCTGACCACA

>UDNZI:00317:00150
TCTGATACTGTGACCCAAGACACA

>UDNZI:00320:00210
ATTTCGATCGTAATGTGGCATACA

>UDNZI:00328:00225
TTTTGCAATGTAGTTAGGATCACA

>UDNZI:00334:00203
CTTTCAACTGTACTCTGGCATACA

>UDNZI:00343:00245
ATGTAGTCCGCACCACATTCGGAC

>UDNZI:00309:00286
AACTTAGTGCTCCAGACCACAATT

>UDNZI:00321:00281
AACAATGTATTCCACACTACAGTC

>UDNZI:00342:00290
ATGTAACGTGCAATACATTTCTGT

>UDNZI:00311:00345
CTGGTTTCTGTACGCTGGGGTACA

>UDNZI:00314:00336
TATACGAATGTAATCTACGATACG

>UDNZI:00316:00310
TCTCTCGTTCATCCTCTGCCCTTG

>UDNZI:00321:00320
GCTTGTGACCTAGCATACAGTTTA

>UDNZI:00323:00305
ACAGTAATTGTAGCGGAAAATACA

>UDNZI:00336:00322
TCCTGTAGCCCATCCTACATTCCT

>UDNZI:00345:00309
CTGTATGTGACATCCGAGGTCCGT

>UDNZI:00309:00352
ACGCTGATACATCCGAATGCATCT

>UDNZI:00323:00360
ACCCTGATTGTATACCATGATACA

>UDNZI:00325:00393
TTGCACATTGTGAGCGCGACTACA

>UDNZI:00336:00373
ACCTTTGTATGTTAAGATACAATT

>UDNZI:00300:00441
CCCTAAAATGTACTCGTGCCTACA

>UDNZI:00346:00446
AACTGGTTTGTATGCTTCAATACT

>UDNZI:00309:00481
ATGTACGCCCGCATACATTCTTTA

>UDNZI:00328:00474
TTGTGACCTACGATACATATTCCG

>UDNZI:00343:00480
TAGCAGATTGTGTGCCTGACTACG

>UDNZI:00307:00526
TGCATCGTTGTAAGCTGCAATACA

>UDNZI:00336:00506
TTTTGGATTGTGTCATACGCCACC

>UDNZI:00343:00528
ACAGAATTTGTAGCGTAGGACACT

>UDNZI:00346:00526
AACACAATTGTAAGAGGGATTACA

>UDNZI:00307:00567
AGGCAAACTGTAGCGCGAACTACA

>UDNZI:00307:00587
GGTATAATAGTGTCACATACTACA

>UDNZI:00315:00587
GTGAGACTTGTAGTGTGGGCTACT

>UDNZI:00333:00560
CCCACGAATTGTATTTCCCGATAC

>UDNZI:00339:00576
ATGTATGCTAGAGCACAATTCGGA

>UDNZI:00340:00596
TTAGGTTTTGTATGCAAGCACACA

>UDNZI:00302:00619
CATACGATTGTGTCCTGGCCTACT

>UDNZI:00331:00607
ATAAAGATTGTAGCCCAGCATCAA

>UDNZI:00336:00645
GCAATAGTATTCTAGAGCACATTC

>UDNZI:00348:00619
AAAGACCATCCGTTTGGCCTACCC

>UDNZI:00307:00694
CCTACATTTGTGGCATACAACACA

>UDNZI:00340:00654
TATGGGACCTGTATTCTGGCATAC

>UDNZI:00349:00698
TTGTATTCTGGGATACCATTGCCA

>UDNZI:00310:00717
AAACACATTGTGTTCTGGGTCACT

>UDNZI:00325:00741
TCAGGGTTTGTATCCGGTCGCACA

>UDNZI:00326:00725
ATGTAACTGTGTCCTAGGCCACAA

>UDNZI:00319:00784
GGCTTGATTGTACTGTACGGCACA

>UDNZI:00324:00766
GAGTACACCGTAGCGTGCGTCACA

>UDNZI:00325:00765
ATTGGTTTTGTAATACCGAATACA

>UDNZI:00347:00760
CATAGAACCGTATGTTATACTACA

>UDNZI:00302:00807
TTCTGGATTGTAAGAGAAGCTACT

>UDNZI:00302:00840
AACATTGTGTCTCTGGTCACAGTC

>UDNZI:00326:00817
TGCGACTGTGATCCAAGTCACATA

>UDNZI:00342:00807
GGTCTAATTGTATTGCTGCCCACA

>UDNZI:00322:00868
CACGACTTTGCATCCCATGCTACA

>UDNZI:00324:00877
TTGTGTCCCAGCTTACATACTCTG

>UDNZI:00339:00885
ACTAGCATCCATGTAGATCGTCTA

>UDNZI:00302:00922
GATTGAAATTGTGCCGAGCTTACA

>UDNZI:00303:00914
ATGTTAACTGTGCCCGGAACTACA

>UDNZI:00323:00946
ATGCACTTTGTAACCCATCTTACA

>UDNZI:00328:00936
ACGCCCTTTGTATTCCGTCATACA

>UDNZI:00301:00965
CCTCCGATTGTGATGTAGGCTACG

>UDNZI:00339:00989
TTGTATTTGTAATGCAGCCCACAA

>UDNZI:00345:00998
GTCTTACTTGTGCTCTCGAATACA

>UDNZI:00305:01031
CCCCGTCGACCATCCGACATCGGG

>UDNZI:00309:01004
TATATCATTGTACCCTACGTCACA

>UDNZI:00340:01038
TACGTGAATGTAGTCTACAGTACA

>UDNZI:00329:01101
TACTTCACTGTGTCACAAGACACA

>UDNZI:00360:00034
GAAATGTGCTCTGGCATACACTTT

>UDNZI:00361:00007
ACTACTCCATCATCCGCTTACATC

>UDNZI:00366:00034
TTAGAATTGTAAGATAGACCACTT

>UDNZI:00366:00037
GCTCCAATTGTGATGCAGCCTACG

>UDNZI:00373:00030
TGTATCCTGGACTACAGTCTGGGT

>UDNZI:00391:00005
TTGTGTCCCACGCTACTTTCAGCA

>UDNZI:00361:00097
CGACTGAATGTAATGTAGCATACA

>UDNZI:00392:00062
CGAAAAATTGTATCAGAGCTCACT

>UDNZI:00394:00087
CGTAACCAGCATCCTTTGTCATGT

>UDNZI:00363:00111
TTGTATTGCCGAGTACAGTTTGAA

>UDNZI:00399:00130
GAAAAACAGTATCCTGGCATACAT

>UDNZI:00355:00182
CATCAAACTGTGTTTCACGTTACA

>UDNZI:00361:00181
GCTTCGATTGTATTCTCGAATACG

>UDNZI:00397:00174
TTGTACCCTGCACTACAATTGGCT

>UDNZI:00371:00232
GGCTGAATTGTGGGTTGCGTTACT

>UDNZI:00382:00204
TTGTATTCCCCACTACAGTTAATG

>UDNZI:00398:00211
AAATTTGTATCTTGCAATACAGTC

>UDNZI:00356:00253
GATAAGAATGTATTGTGTATTACT

>UDNZI:00364:00251
ACGGCAATAGTAGTCCCGACCACA

>UDNZI:00384:00261
CTTGTAGTCCAGCTTACAATTGTG

>UDNZI:00399:00274
CCTAGAATAGTAGCCTGCGCCACA

>UDNZI:00351:00310
GAGTGTATCACGGAGCACAATCTA

>UDNZI:00382:00325
TTGTATTATGGCCTACAGTCTGAT

>UDNZI:00363:00393
AACGGAAAGTGTATTCCAGAATAC

>UDNZI:00384:00395
ATTACAAATGTAAGGGAGGTTACA

>UDNZI:00387:00369
AAGTAGGCTGTAATACAATCTCCG

>UDNZI:00359:00406
TTGAAGACTGTGTGTTAGAACACT

>UDNZI:00365:00405
TCCGGCCCGGCCATCCGTGCGTCT

>UDNZI:00373:00433
TTGTATGCCAGCGTACGATTGGAG

>UDNZI:00351:00456
CCGGTTATCACATCCGAGATTCTC

>UDNZI:00362:00485
GATAAATTGTATCTTCGCCTACAT

>UDNZI:00393:00459
AATAGAAGTGTGTCCGAGCCTACT

>UDNZI:00350:00507
AATTTTGTAGCATACATTACATTG

>UDNZI:00351:00527
AACAGGAATGTAATCTATGTTACT

>UDNZI:00355:00517
AGACCAATTGTGACTTATATTACT

>UDNZI:00361:00522
ATGCAGAATGTGAGGTGGCATACA

>UDNZI:00364:00546
TCTATTATTGTATCATGCATTACA

>UDNZI:00384:00522
AAGTTTGTATTCTATGGCACATTT

>UDNZI:00386:00531
GTACCTACTGTATCGTAGGCTACA

>UDNZI:00386:00540
AACTGTAACGTATGATAGACTACA

>UDNZI:00350:00580
TTGTAGGCTCCGACACAATTATAA

>UDNZI:00350:00596
CATAAACTGTATTATGGGCTACAC

>UDNZI:00353:00566
ACTAGAAATGTACTCGGTGCTACA

>UDNZI:00375:00583
CTCGAATTGTGTCCTATGCTACAC

>UDNZI:00379:00576
TTGTATTGAGGCTTACAATTTTCC

>UDNZI:00376:00629
GAACGATTGTAATCCCTCATACAT

>UDNZI:00380:00600
TTGTGTCCCAGCTTACAGGTGGCT

>UDNZI:00381:00647
AATACGACTGTAAGCCAGAATACT

>UDNZI:00384:00639
TTGTGTTCTGTAATACTTTTGTCT

>UDNZI:00388:00602
ATCACAATTGTATCCTGGGCTAAG

>UDNZI:00389:00634
GATGAGCATGCATCCTAGACTGTA

>UDNZI:00350:00690
CCTCGATTGTAGTACACGCTACAT

>UDNZI:00351:00683
AAATTCATCGTATCGTGCATTACA

>UDNZI:00362:00664
AACCAATTCGTATGCCAACTTACA

>UDNZI:00362:00670
TGAGTGATCGTGCTCTCGAATACA

>UDNZI:00369:00692
ATAAAAAATGTACTATAGCTTACA

>UDNZI:00379:00674
TAGTGACTTAGACTACAATTGTGT

>UDNZI:00384:00675
ACTCCGATTGTAGCCAGGCATACA

>UDNZI:00396:00659
AAAAATGTAATATGGAATACATTA

>UDNZI:00365:00706
GCTAGAGTGTAAGCCAGCCTACAC

>UDNZI:00371:00709
ATTGAAATTGTAGTCGAGGACACA

>UDNZI:00377:00704
GACTACAATCATCCCCTAAATTAC

>UDNZI:00378:00727
AGAATAATTGTAACCAGGACCACT

>UDNZI:00395:00705
CTTTCAATTGTATTGCTAGGCACA

>UDNZI:00397:00740
TGATAGACTGTAACATAGGACACA

>UDNZI:00399:00733
ACATCAACTGTATTCGGGGCTACG

>UDNZI:00352:00767
CTATGACTGTAGCCCCTACTACAA

>UDNZI:00361:00778
ACATGAATTGTATGCTTGCTCACA

>UDNZI:00378:00797
TTGTAGCCGCGACTACAATAAGGA

>UDNZI:00380:00761
TTGTAGCCCTGCTTACACTGTGTT

>UDNZI:00389:00778
TGCAATTGTCTGCTGTGATACACT

>UDNZI:00355:00838
GAAAAATTGTATTCCAAGACACAC

>UDNZI:00368:00813
CCCGCGATAGTATTCTAGGGCACT

>UDNZI:00378:00846
CTCTAGACAGTGACCTAGACTACA

>UDNZI:00379:00827
AGTGCTTGTGTGGTCCCGCTTACA

>UDNZI:00386:00842
AGAACACTGTGGCCCAGGCCACAT

>UDNZI:00391:00824
TTGTATTTAGCAATACAATCTTGA

>UDNZI:00367:00856
TCGGTTTGTGTATCCCACGTTACA

>UDNZI:00384:00895
CTTGTAATTGTATTGCGGAATACC

>UDNZI:00391:00888
GTTACATGTGTATGCTACACCACA

>UDNZI:00372:00919
CTGTAGTCTGTATGTTAGGACACA

>UDNZI:00385:00923
AACTCTATTGTATCCTAGAACACA

>UDNZI:00389:00912
ACCATTAAATGTGGTGTAAGTCAC

>UDNZI:00370:00958
AATAGTGTATGCCAGACTACATAA

>UDNZI:00371:00983
TTGTAATCCACGGCACAAATGCTT

>UDNZI:00398:00982
AAACCGAATTGTCAATCAGATCAC

>UDNZI:00367:01044
TTTTATTTAGTGCTCTGGCATACA

>UDNZI:00386:01006
CTCGTATTTGTATTCCACAATACC

>UDNZI:00356:01068
GGGAAGACTGTACTCTCGACTACA

>UDNZI:00360:01097
TATCCGATTGTATCACACGTTACT

>UDNZI:00368:01085
TTTGTAAAAGTATCCGGGATTACA

>UDNZI:00371:01069
GATAGAACTGTAAGCCTGGCCACA

>UDNZI:00393:01104
GGCGCTATTGTAACACAGAACACA

>UDNZI:00387:01184
AATGGCTTGTAAGCCAGCACTACC

>UDNZI:00400:00009
CTTAAGATTGTATTGTAGACCCCT

>UDNZI:00413:00045
GCCTAGTTTGTATCCTGGGTCACA

>UDNZI:00419:00029
GAACTGTGGCACTGCATACAATTG

>UDNZI:00422:00027
TTGTGTTCTGTGCTACATTCCGCC

>UDNZI:00444:00046
CCCTACTTCGCATCCGGGATTTCA

>UDNZI:00404:00092
TTCCCAATTGTGATGGGGCATACG

>UDNZI:00406:00061
TTGTATGTCAGGCCACTATCTTGA

>UDNZI:00405:00102
GTACTCATTGTAGGCTAGCTTACA

>UDNZI:00411:00121
TTGTGATCTGGCCTACAATGACCT

>UDNZI:00416:00111
TTGTATGCTCCGCTACAATCTCGG

>UDNZI:00445:00109
TTTATGTGTAGTCTGTAACTACAG

>UDNZI:00445:00132
TTATCAAATGTGCTGTAGGATACA

>UDNZI:00409:00163
TCCGGTTTCGTATCCTGGCATACA

>UDNZI:00427:00217
ATTGCGATTGTACGCTGGTGCACC

>UDNZI:00429:00243
GAAGACATTGTGACCCGGGTTACA

>UDNZI:00435:00216
CCCTAAATTGTATTCGGGATTACT

>UDNZI:00440:00210
ATCACAATTGTGGGCCCTAATACA

>UDNZI:00445:00229
ACATACTATGTATGGCAAGACACA

>UDNZI:00423:00276
GATTCACTTGTAACCTACACTACA

>UDNZI:00427:00291
TTGGAGAATGTGGGTACGGCTACA

>UDNZI:00440:00263
TTGTGTCCTATGTTACAATGGATA

>UDNZI:00421:00311
CTGGAGATTGTAATCGAGAATACG

>UDNZI:00437:00321
CCTCCAATTGTGTTACAGACTACC

>UDNZI:00407:00399
GTCTTAACTGTGTCATGACATACA

>UDNZI:00424:00384
TAACGATATGTAATCCCGGTTACA

>UDNZI:00429:00391
GCGAAATTTGTGGTCCACACTACT

>UDNZI:00406:00407
CCTGAGATTGTGGCCTCTATTACA

>UDNZI:00424:00403
ATCTCGAATTGTGCGCCATCATAC

>UDNZI:00438:00436
ATATACATTGTGTCCCTGACTACA

>UDNZI:00400:00467
TAGAGTGTGGTCTATGTTACAAAG

>UDNZI:00417:00461
GATCGCATTGTATGACAGCTCACA

>UDNZI:00425:00488
CAAGAAATTGTGGTCGAGCATACA

>UDNZI:00431:00495
AACCCGTCTGTGTCCGGCGCCACA

>UDNZI:00434:00458
GAATTGTGTGCTAGAATACAAAAG

>UDNZI:00412:00510
AGCTCAACCGTATGCTACCTTACA

>UDNZI:00437:00538
TATATGCTACCATCCGGTTTTTGA

>UDNZI:00444:00515
CATTCGAACGTATGCCCGGCTACA

>UDNZI:00404:00569
AACTAAGTTTGTAACGTGGATTAC

>UDNZI:00417:00589
TTGTACTCGCGCATACTATTACAA

>UDNZI:00421:00585
CACTAGACAGTGTCGTGGCATACA

>UDNZI:00427:00581
GTCAATTGTATGCCCGAATACAGG

>UDNZI:00428:00592
CGCGACTTTGTGCTATGGAGCACA

>UDNZI:00448:00556
AAGTATGCCAGAATACAATCGCAC

>UDNZI:00449:00553
ATTCGGAAAGTAGTTCAACCTACA

>UDNZI:00406:00625
GTGAGGATCGTATTGCACGTTACA

>UDNZI:00412:00645
CACACTTAGGCATCCATCACTCCC

>UDNZI:00413:00628
TGTGCAATTGTACTCCTTCATACA

>UDNZI:00421:00608
TTGTATCCCTGGATACATTTACGA

>UDNZI:00427:00612
CGCATAAATGTATTCCTGACTACA

>UDNZI:00433:00619
CGTATTTTTGTATGCTATCTTACA

>UDNZI:00446:00607
CCGTAATCCAGCATACAATTTTTG

>UDNZI:00419:00689
GGATAAACTGTATTACAGACCACT

>UDNZI:00444:00659
TCCCTCTGTTCTCCAGTGTGTAGC

>UDNZI:00412:00726
TCGTAGTCCAGGCTACAATGTCCA

>UDNZI:00414:00705
CTGTAAGCCATAATACAATTTCTA

>UDNZI:00418:00706
GACCGAAATTGTATTATAAGGTAC

>UDNZI:00432:00702
TTGTATTCCATATTACAATTGTGG

>UDNZI:00432:00703
GAATAAACTGTAGCCTGTGTCACA

>UDNZI:00442:00732
TTGTATCTCTTACTACAATTGTAA

>UDNZI:00403:00787
AGCTCGATTGTAGTGCGGGTTACA

>UDNZI:00406:00761
AATATTGTGGTTTGAGATACATTT

>UDNZI:00408:00755
CTACACTTTGTGATACAGCCCACA

>UDNZI:00409:00765
GCTGCAATAGTGGCGCGGGTTACA

>UDNZI:00417:00781
TTGTACGCCATACTACAATGAACA

>UDNZI:00424:00775
AAGATTGTCATCCCCACTACAGTT

>UDNZI:00445:00784
ATACCAATTGTATCCTGTATTACG

>UDNZI:00401:00827
ATCCGAACTGTATTCTTCCCTACA

>UDNZI:00403:00845
TCCAGAATTGTAACCCCTCGTACA

>UDNZI:00410:00828
AATGGACTGTATGATAGATTACAA

>UDNZI:00412:00820
TTGTATAAAGTAAGCTAGACTACA

>UDNZI:00414:00828
ATGTATCCTCACATACAATTGACA

>UDNZI:00446:00863
GTGAACTTCGTAACCCAGGTTACA

>UDNZI:00403:00916
GTTAGGACTGTATTCGGGCATACA

>UDNZI:00426:00913
TTGTAGTGCAAGCTACAATATCAA

>UDNZI:00431:00918
CTCACAACTGTATCGTATCATACA

>UDNZI:00410:00962
CATCAAAATGTAGGCCTCCATACA

>UDNZI:00412:00968
AACGAATATGTATCGTAGCCCACA

>UDNZI:00427:00958
AGAAATACTGTGACCTAAACTACA

>UDNZI:00433:00989
TTTAACATTGTATTACCGGTCACA

>UDNZI:00421:01032
CCAAGCATTGTGTTCTGAGATACA

>UDNZI:00422:01002
ATGCCGACATCATCCGCGATTGAA

>UDNZI:00422:01044
GTCTTCACTGTGGCGTAGGGCACA

>UDNZI:00405:01141
ACTAACATTGTAATCTTGACCACA

>UDNZI:00425:01136
TCGCAGAATGTATTATACGTTACT

>UDNZI:00434:01118
TAACTGATTGTGATTCTGCTTACA

>UDNZI:00417:01165
ACTTAACTGTATGCCATCCTACAA

>UDNZI:00448:01192
TGACTGTAGTGCAGCATACAATTC

>UDNZI:00440:01231
ATACCTGTTGTATTGTAGAATACA

>UDNZI:00471:00020
GATACTGTAGCCCCGACCACAATC

>UDNZI:00454:00067
TAGGCGATTGTATCGTTGAATACA

>UDNZI:00479:00069
TCCCGGACATCATCCTTCGTAGGG

>UDNZI:00451:00143
CTACCACATTGTCGTCGCGTTACA

>UDNZI:00452:00144
TCTCCTATTGTATCACCCGATACA

>UDNZI:00468:00108
TTGTATTCGACAATACACATCAGT

>UDNZI:00474:00141
CCTGAATTGTAATCTAGATCACGC

>UDNZI:00492:00134
ATGTACTTTGTATGCAGCCACACA

>UDNZI:00497:00130
TGACTTTCTGTATTCCAGATCACA

>UDNZI:00451:00188
GCCTCAATTGTGACCGTGCACACA

>UDNZI:00474:00169
GGCTACAATGTAGTGTGCAATACT

>UDNZI:00480:00163
CTCTTTATTGTATTGTAGGTGACA

>UDNZI:00485:00189
TTTGCAATTGTATACTGTATTACA

>UDNZI:00451:00225
CGCCTACCTGTAGCGTAGCACACA

>UDNZI:00487:00220
ATTAGCATTGTATTTTGCATTACA

>UDNZI:00451:00299
CTACCCGCTTCATCCCGACCTTCC

>UDNZI:00459:00271
TAGCCAATTGTGTTCGAAGTTACA

>UDNZI:00461:00255
TGGAATGTATCTCAGGCTACATTC

>UDNZI:00470:00295
AAGTCGAATGTAATCTGACTTACA

>UDNZI:00472:00268
GTTGCGATTGTGTCCAAGGACACA

>UDNZI:00492:00286
GCTCTAATGTCACTACAGATTACA

>UDNZI:00498:00277
ACGTATCTACATCCGCCTGATGCT

>UDNZI:00464:00313
CCTGAAATTGTGATGATGAATACA

>UDNZI:00467:00398
CTACAACTTGTAACGCAGGATACA

>UDNZI:00473:00367
GCAGTAATTGTAAGCAGAGTCACA

>UDNZI:00477:00366
CTAGCATTTGTGTCCCAGGTCACT

>UDNZI:00455:00436
GGTAGGGATACATCCTCGTTTCTT

>UDNZI:00457:00408
TTCTTTGTAGTACATATTACTATT

>UDNZI:00477:00470
TCCAAAAAAGTAGTCACCAATACA

>UDNZI:00496:00490
TTTAGCACTGTGGCCTGCATTACA

>UDNZI:00498:00496
TTGTAGTCCGGATTACATTTTAAA

>UDNZI:00463:00514
GTAGGACTTGTACGCTAAGTCACA

>UDNZI:00479:00520
TCGAAGAATGTGAGCCACGCTACT

>UDNZI:00489:00526
CGTCGAATTGTGGCGCATCTTACT

>UDNZI:00454:00552
GACCTAAATGTATGCTGGGATACA

>UDNZI:00454:00590
TGTCGATATGTGGTCCAGGTCACA

>UDNZI:00472:00560
TGGTCGATTGTGACCGTCACTACT

>UDNZI:00488:00572
AGCGGTGGATCATCCGCACCTAAT

>UDNZI:00460:00634
TTTGTCTTTGTATTCGCGGACACA

>UDNZI:00463:00624
GTACGATATGTACTCTAGAATACA

>UDNZI:00482:00608
AAATATTTTGTATGCTCGATTACA

>UDNZI:00487:00644
TAAGAAAATGTAGTCGGCACCACA

>UDNZI:00499:00637
AAAAGCTTTGTATGTTGGAATACA

>UDNZI:00456:00674
AAGCAGAATGTATTCTGACCTACA

>UDNZI:00459:00683
AGCGGGTTTGTACGCCAGCATACA

>UDNZI:00460:00681
ACTCAAATTGTACGCTGTATCACA

>UDNZI:00463:00664
CTTCGAATTGTAGCCTACACCACT

>UDNZI:00466:00659
TTGTATTCTGGAATACCGTCGTAT

>UDNZI:00467:00678
TCCGTCATTGTAGCGTAGAACACT

>UDNZI:00481:00679
CTGTGAATTGTATTCTAGACTCAA

>UDNZI:00485:00680
AACTAACTTGTATTCTAACTTACT

>UDNZI:00485:00691
TTGTGACCCTGGTTACAATCCCTC

>UDNZI:00492:00688
AGTTGCCATCCAAGGTATGATTCA

>UDNZI:00495:00651
CGCTATATTGTATGTTCCGATACA

>UDNZI:00499:00658
TGTATAATTGTGGTCTACAATACA

>UDNZI:00450:00706
ACCGGAAATGTGACTTAAAATACA

>UDNZI:00465:00714
CCTTAACTGTGACCCAGGCTACAG

>UDNZI:00472:00744
GTCTCCATTGTATGCTGCATTACT

>UDNZI:00480:00731
AGCGGCTTTGTACTCTGCACTACG

>UDNZI:00489:00708
ACTATGATCGTGACCCTCGATACA

>UDNZI:00498:00722
TTGTGAAGTGTGCTCAGCAATACA

>UDNZI:00469:00787
GGCCGCATTGTAAGCTCAGATACA

>UDNZI:00470:00772
CCTCAAATAGTATTGTGCCATACA

>UDNZI:00495:00789
GATACGATTGTATTGTACCCTACA

>UDNZI:00497:00794
CAATAGACCGTAGTATGGGATACA

>UDNZI:00474:00840
CTAGCAACTGTATTGTGCAATACC

>UDNZI:00461:00998
TCTTGTATTGTAGGCTGGACTACA

>UDNZI:00487:00992
ATCTTTGTAGCCCAGACTACAGGA

>UDNZI:00490:00956
CAAGAAATGTGCCCCAGCCTACAT

>UDNZI:00493:00992
TCCTCAACTGTATCGTAGCATACT

>UDNZI:00469:01007
TGCCAAATGTATCCTATACTACAC

>UDNZI:00475:01034
AAACAATTTGTAGCCAGGGACACT

>UDNZI:00492:01048
TTGTATGCTACACTACTATACCTT

>UDNZI:00498:01043
GTTAAAATTGTAGTCTAGAACTCT

>UDNZI:00476:01056
ACTAGAACTGTGGGTTACGTTACA

>UDNZI:00464:01149
CAGTCAAATGTCATCTAGCATACA

>UDNZI:00471:01141
GCACAAAATGTACTCCACGACACA

>UDNZI:00479:01102
CCATTTGTAATGTACGTCACATTT

>UDNZI:00486:01100
AAGTTGCAAGCATCCTCTATAAGA

>UDNZI:00451:01177
AAATTGTAGCCCTGAATACTTTTA

>UDNZI:00466:01172
TCTCAACTTTGTAATCTGCGCCAC

>UDNZI:00481:01179
ACACCGTTTGTATGCTAACTCACA

>UDNZI:00484:01158
TATCAGATTGTAATTCCTGCTACA

>UDNZI:00456:01217
CAGTGTGCGCCAGCATACAGTCTT

>UDNZI:00459:01208
CATGATTTGTGGCCGGGATCACTA

>UDNZI:00476:01200
ACCTCGATTGTAACTCTCATTACA

>UDNZI:00476:01210
ATAGTAAGCCAGGCTACAATCCAT

>UDNZI:00493:01221
ACCAGAAGTGTATTTCAGATCACA

>UDNZI:00506:00034
ATGTACTCTGTATTGTAGCTTACA

>UDNZI:00507:00043
ACTCGAATTGTAACACTTAATACA

>UDNZI:00517:00056
CCTTGGAATGTGTCCTCAACTACA

>UDNZI:00532:00050
TTCAATTCTGTGTCCCTCCTTACA

>UDNZI:00533:00059
TTCGGACTTGTAACCTGCGTTACA

>UDNZI:00539:00077
TGTTAAATTGTATTCTGGGCTGCA

>UDNZI:00544:00087
ATTGAATATGTGGGCTGCCGTACA

>UDNZI:00545:00115
ATACCGATAGTATTTTGGAATACA

>UDNZI:00516:00169
CGAACCATTGTATGCAGACCCACA

>UDNZI:00533:00176
CACGATTGTAACCTAGCTTACAGG

>UDNZI:00539:00190
TCTCACTTTGTAATCTAGGGTACA

>UDNZI:00542:00156
TCCCCGATTGTGACCCATGCTACT

>UDNZI:00548:00174
TTTCGGATTGTCGCCGGGATCACA

>UDNZI:00512:00205
GTCATGGTAGCATCCGCCGTCTCA

>UDNZI:00513:00205
CTGTATCCCAACATACAAATTAGA

>UDNZI:00515:00248
CTCTTATCGGTATGTAGACACGTA

>UDNZI:00519:00220
TACCTATCTGTATTACAGCACACA

>UDNZI:00535:00231
TTGTGTTCTACACTACATTCTTGG

>UDNZI:00541:00231
TTCTACATTGTAGGGTGTAGTACA

>UDNZI:00510:00297
TAATTTTTTGTAACTCAGGCTACT

>UDNZI:00523:00252
CGTATCATTGTGTCCTGTGTCACA

>UDNZI:00525:00251
CTTCCCTTTGTATCCTAGAATACT

>UDNZI:00519:00306
TACTACTATGTATTGCACGCCACA

>UDNZI:00522:00329
TTGTATTCTGCGTCACAGATGGTG

>UDNZI:00522:00335
TTGTGTCGCCGAATACACTTCTAT

>UDNZI:00510:00392
ATGTATGCTAGACTACAAATTCTG

>UDNZI:00519:00359
GATTTAAATGTAATCGTGATCACA

>UDNZI:00519:00374
AAACGGTTTGTAGCCCAAACTACT

>UDNZI:00540:00392
TATCAAATTGTGTTCTGGCCTACA

>UDNZI:00514:00440
CTCAAGATTGTGGCAGACGTCACT

>UDNZI:00523:00401
GTCTAAACTGTACGCACGGCTACA

>UDNZI:00526:00402
CTTCGACTGTATGCCCAGATACAT

>UDNZI:00526:00436
TTTACGAATTGTAATACACGTCAC

>UDNZI:00505:00459
AGTTACTTAGTATTCTAGGTTACT

>UDNZI:00511:00492
CATCTAATTGTATCGCAGAATACA

>UDNZI:00514:00454
ATAGTGATTGTATGCAGCGCTACT

>UDNZI:00538:00492
TAAACGTCTTCATCCTGTCTCTAT

>UDNZI:00512:00533
GAGTGTGTTCTGCGTCACAATTCA

>UDNZI:00547:00513
TTTCAACCTGTAATCTAGCATACA

>UDNZI:00519:00560
AATAGAAATGTATCTGAGCCTACA

>UDNZI:00523:00585
TTTCAGATAGTGTTTCACGCTACA

>UDNZI:00527:00560
CATGCAAAAGTAGCCTAGAATACA

>UDNZI:00534:00564
ATATGAATTGTAGTTGACGCCACA

>UDNZI:00535:00586
AACATAACTGTATTATAGGACACA

>UDNZI:00542:00575
CTATCTGTATCCTAGGCCACAATA

>UDNZI:00505:00637
GTTGAATTGTACTGTACGTCACAT

>UDNZI:00522:00645
CTATGAATTGTGCTCCTTCATACA

>UDNZI:00534:00627
AGCCAGATTGTAACCGACGCCACA

>UDNZI:00546:00625
AATAATATTGTGATCTAGGCTACA

>UDNZI:00503:00791
AACCGGTCTGTATCCTCGGATACT

>UDNZI:00511:00758
TAATTAATTGTATCACACGTTACA

>UDNZI:00521:00758
GTATTGATTGTAATGTGTGCTACA

>UDNZI:00522:00796
ATGAAAATCGTGCTCTGGATTACA

>UDNZI:00526:00755
CAAAAGTGTCCTAGGGCACAATCA

>UDNZI:00531:00785
GATTATATTGTGACCTGGGGCACC

>UDNZI:00542:00789
ATATCGATTGTATGACAACATACT

>UDNZI:00527:00843
GAGATTGTGGCGTACGATACAATC

>UDNZI:00531:00849
TTTTTAGTATGCTAGACCACATTC

>UDNZI:00540:00800
CGCGTCCTGTCATCCAAAACCGGG

>UDNZI:00510:00913
TCGTGACTTGTGACCTGGCATACA

>UDNZI:00534:00934
ACATCAAGTGTAACTCAGCGTACA

>UDNZI:00535:00922
ACATGGATTGTAGGATACGATACA

>UDNZI:00540:00930
TACACCATTGTAACTTGCGATACA

>UDNZI:00546:00939
TATCCTGACTGTAGCGTATGTCAC

>UDNZI:00533:00961
GTTAGAAACGTAGTGAGCACTACA

>UDNZI:00543:00969
ATCCGAAATGTGCCATAGCACACA

>UDNZI:00530:01087
ACGTCAATTGTATTCTACGCTACA

>UDNZI:00532:01071
ATGTATTGTAGAGTACAGTCTCAT

>UDNZI:00534:01092
ATCTTGCATCCACCGCACCAACCT

>UDNZI:00541:01068
AAAAGGATTGTGATGCAGCATACA

>UDNZI:00543:01085
CTCGTGACTGTAGTACTGGGCACA

>UDNZI:00548:01061
CGGGAATTGTAGCCGGAAATACAA

>UDNZI:00504:01124
ACTTACTTTGTATCCTACGTTACG

>UDNZI:00505:01115
AGAGTGATTGTACGATCAACTACA

>UDNZI:00519:01130
CCTGCAATTGTATCCCTGAACACT

>UDNZI:00529:01142
TTGTAGCATAGCATACAATGCGCA

>UDNZI:00512:01157
TTGTAGTCTGGAATACAATCGTCC

>UDNZI:00512:01183
ATCAATTGTGTCGTCGCATACGAA

>UDNZI:00542:01197
CACACTGTAGTCGGGGCTACAATA

>UDNZI:00547:01165
ACGTAGATTGTATCTTAACATGCA

>UDNZI:00548:01170
AGTCTCTTTGTAACCCAGAATACT

>UDNZI:00501:01217
TCTTAAAATGTGTTCCAGGGTACT

>UDNZI:00501:01247
ATCACAATTGTGGGCCCTAATACA

>UDNZI:00506:01223
GGTTCGATTGTAGGCCGTCCTACA

>UDNZI:00512:01245
TTTCAGATAGTGATCCGTCCTACA

>UDNZI:00520:01210
GTCTTAACTGTGTCATGACATACA

>UDNZI:00527:01235
ATAGAATAGTAGCCCACGATACAA

>UDNZI:00532:01240
CTTCTCATTGTATTCTAGCATACC

>UDNZI:00569:00027
CTGTAATCTAAACTACAATGTGTT

>UDNZI:00589:00026
TATCGGATTGTGTCGTGCGTGACA

>UDNZI:00554:00070
TGTCAACTGTAGCACAGGTCACAT

>UDNZI:00561:00099
TCTGATGCTTCATCCAGCTAAACC

>UDNZI:00589:00084
TTAGCGAGTGTAAGGCACGCCACA

>UDNZI:00597:00074
CACGGAAATGTAAGAAGGCATACA

>UDNZI:00559:00119
TTGTGGCCTAAGTCACAATTCGAA

>UDNZI:00587:00139
ATACAGTTTGTAGCTGAGCTTACA

>UDNZI:00556:00193
AACATAATTGTGGTCTAGATCACT

>UDNZI:00579:00185
GTGTAGGCTAGCATACAGTTCGAT

>UDNZI:00580:00154
CTCCAGTTTGTATCTCAGCATACT

>UDNZI:00552:00202
CAGATTGTGCTCCAAAGTACACAT

>UDNZI:00596:00248
TACCAGTTTGTAACGTGCAGTACA

>UDNZI:00599:00242
ACAGATTGTATTCTGTGCTACTAA

>UDNZI:00555:00300
TGACACTTTGTATTCCTGACTACA

>UDNZI:00576:00305
AAATTATGTGTGTTCTAGGCCACA

>UDNZI:00583:00342
TAAAAAATCGTATGCAGGGCTACA

>UDNZI:00586:00304
ATTACATTGTATCCGGGCCTACAC

>UDNZI:00564:00379
AGAGACTTTGTAGTGTGGGACACT

>UDNZI:00589:00386
AATCAGATTGTAGCTGCTCATACA

>UDNZI:00590:00362
TTTTACATTGTAAGCTGTAACACG

>UDNZI:00554:00428
AGAAAAATGTAAGATGGGATACTT

>UDNZI:00564:00402
ATTAAAATAGTAGTACATGATACA

>UDNZI:00555:00500
CAAACTGTGGGCCAGGATACATTA

>UDNZI:00561:00540
TTCATGACAGTGTCCTAGACTACA

>UDNZI:00577:00532
TAGTATTCTAGGTCACAATAATCG

>UDNZI:00589:00527
GCGAAAATTGTGAGTTAGATTACA

>UDNZI:00590:00533
GAAGATTGTAGTGCGAAACACAAT

>UDNZI:00597:00543
TGATAGATTGTGACGGGAGTTACA

>UDNZI:00555:00583
CTGTGCTCTGGCCTACAATCATGA

>UDNZI:00557:00559
TTCTTATGGTATTCTGGAATACAC

>UDNZI:00564:00566
AGTACAAATGTAGTCTGGGTTACA

>UDNZI:00564:00588
GACCGTATTCCATCCTACTATTCC

>UDNZI:00569:00597
GGATTTTCTGTATTCCAGCCTACA

>UDNZI:00575:00568
TTGATTGATTGTATGTCCAGTCAC

>UDNZI:00576:00584
GTAAATTTTGTATGGTGGGTTACT

>UDNZI:00589:00593
ATGTGACCCGGGACACAATGTTCA

>UDNZI:00597:00585
CTATTGATTGTAATACCTGCTACA

>UDNZI:00559:00600
ACCACAACTGTGCTTTAGATCACA

>UDNZI:00577:00625
AGATAATTTGTGTCCTAGGCCACA

>UDNZI:00578:00647
CGTTGACCTGTAATCCACGCTACA

>UDNZI:00579:00635
TCTAAGATTGTGCTCTGGAACTCA

>UDNZI:00591:00612
TTCCTCTTTGTAGTTCAGCCTACA

>UDNZI:00550:00681
GCCTATTGCTGCATCCATTCTATA

>UDNZI:00560:00675
GACTTGATTGTATTCGACATCACA

>UDNZI:00564:00654
GTGTATTACCGCATACAATGTAGA

>UDNZI:00577:00668
CTCATTTGTGTTTTATCTTACAAT

>UDNZI:00579:00667
GAATCATTTGTGAGCAGTAATACA

>UDNZI:00585:00681
TGTAACATTGTATGTTCGATTACA

>UDNZI:00598:00674
CTCACCATTGTAGCGTAGACCACA

>UDNZI:00568:00739
CGCCAGATTGTATGGCAAGATACA

>UDNZI:00569:00748
TGCAACACTGTGTTCTGAAGCACA

>UDNZI:00573:00720
ATGTAGTGTAGACTACAGTTTATG

>UDNZI:00594:00724
AATGTAACTGTGGCCTGAGCCACA

>UDNZI:00599:00729
GATATGATTGTATCCGCAATTACA

>UDNZI:00560:00764
AAAGATTGTATGCCATATTACTCA

>UDNZI:00564:00767
TTGTTGACTGTAATATGCGACACA

>UDNZI:00565:00768
TTTCTCTTTGTAAGACACATCACA

>UDNZI:00550:00824
TGTCAGATAGTATCCTATATTACT

>UDNZI:00552:00840
TTGTATCCAGCAATACGATCTAGA

>UDNZI:00573:00838
TCACAGATTGTATCACACGCTACC

>UDNZI:00555:00856
AACCTGTAGCGCATCCCACAATTT

>UDNZI:00556:00876
GTGTTTTGTGGGATAGCATACAAA

>UDNZI:00562:00872
GTCGATTGTAGTGTCCATTACACA

>UDNZI:00579:00882
ACGGTTTCTGTAGCCCTGACTACA

>UDNZI:00561:00965
AGAAGAAAGTATCCCAGGCTACAG

>UDNZI:00551:01203
GATTCTGTATCCCACGTTACAATG

>UDNZI:00564:01230
GACACGATTGTGTTACTGCATACA

>UDNZI:00576:01202
TATTACTTCGTAGCTTGTGCCACA

>UDNZI:00597:01234
TGGATGATTGTAACCTGGAGCACT

>UDNZI:00586:01266
TTTTGTTTGTAAGCTACCATACAT

>UDNZI:00603:00024
AGTACATAGTATGCCAGGCTACAG

>UDNZI:00607:00035
CGACAAAATGTGCTTCAGACTACA

>UDNZI:00603:00051
GTCAAAATGGTATGCTAGGACACA

>UDNZI:00603:00063
ATTGTTATTGTGCTGTAGGCTACA

>UDNZI:00604:00071
CCGCATTCTCATCCTTCTGGTTTC

>UDNZI:00611:00062
ATTATAATGTATCCCAGAATACTT

>UDNZI:00616:00069
CACCTAACCGTAGGCTAGATCACA

>UDNZI:00623:00075
TTGTGGGCTGCACTACAATTGGAC

>UDNZI:00640:00088
CTGTGATCTGCGTCACATTTTTAA

>UDNZI:00644:00070
ATCTAGACTGTAGCCCCCGTTACA

>UDNZI:00619:00134
CTGACATTGTGGCATACAATACAA

>UDNZI:00637:00138
ACTTGTGACTTGGACTACACTTCT

>UDNZI:00642:00145
TTTCGACCTGTATTCCAGCTTACA

>UDNZI:00645:00104
TTTCATTTGTGATCCACGATACAT

>UDNZI:00608:00191
CTCCGAATTGTGACTCGAGATACA

>UDNZI:00616:00155
GATCAAATAGTATCAACGGATACA

>UDNZI:00620:00191
TCGATAATTGTAGCACGGACTACG

>UDNZI:00628:00183
CCGTACATTGTAGCACAGATTACT

>UDNZI:00633:00187
ACTTAGAAGGTATCTCAAGACACA

>UDNZI:00634:00174
ACCCATTTGTATGCCAGGCTACAT

>UDNZI:00649:00172
GTCTACCCGTCATCCAGCTAACCA

>UDNZI:00612:00203
AAATAGACCGTATGCGGGACTACA

>UDNZI:00612:00234
TTGTATCGCAGAGTACATTCTCGC

>UDNZI:00605:00313
TTGTATCTTGAATCACAATTCCTC

>UDNZI:00601:00394
TTGTGTCCTAGGCTACAGACAAAC

>UDNZI:00615:00373
GAAAATTGTAAGCAACGCTACAAT

>UDNZI:00611:00425
TTTATATTTGTGTTCAGCACTACA

>UDNZI:00624:00423
CCAGAGTGTATCCTAGGGCACAAT

>UDNZI:00630:00443
CTAAATATTGTACTCTGACATACA

>UDNZI:00600:00472
CCCTGCCCGCATCCGTTGTAGGCC

>UDNZI:00624:00464
TCTAAATTTGTAGCATGCACCACA

>UDNZI:00627:00461
TGATAAATCGTATCCTGCACTACA

>UDNZI:00608:00546
TTGTACCCTGGCATACAATCCTTT

>UDNZI:00638:00511
TTGTAGTTTGGAATACAATAGTAC

>UDNZI:00604:00584
ATTGACAATGTATCCTCGCCCACA

>UDNZI:00609:00594
GGCTAAATGTATGTTGGACTACAA

>UDNZI:00613:00576
CCTCGATTGTAGTACACGCTACAT

>UDNZI:00615:00577
TTCCATTTGTATGCTGCGATACAG

>UDNZI:00627:00566
TATCATATTGTAACCTATGCCACA

>UDNZI:00639:00593
GACGCATCTGTATCCTAGAATACA

>UDNZI:00646:00580
GAATCAATTGTACGTTAGATTACA

>UDNZI:00616:00622
GTGTCACTTGTATCGTCAGTCACA

>UDNZI:00643:00615
AAACAATTTGTGTCCTGCATTACA

>UDNZI:00646:00604
TTTGAAACTGTACTCTGTCGTACA

>UDNZI:00615:00695
ATCTAATCTGTGGCCTGTACTACA

>UDNZI:00648:00681
CAGGGACTTGTATCCCGGATTACA

>UDNZI:00649:00691
TGTCAAGTTGTAGTCCCGATTACA

>UDNZI:00619:00731
TCATATAATGTAATGTACACTACA

>UDNZI:00640:00741
ACGCTTTGTAACTCACGTCACATA

>UDNZI:00642:00744
AAGACTTATGTAGTCCCTCATACA

>UDNZI:00610:00761
ATCCCAACTGTATCTTTCGCTACA

>UDNZI:00612:00754
AGCGCGATTGTACTCCAGAGTACT

>UDNZI:00614:00793
GTCCTACTCTGTAGCGTAGAATAC

>UDNZI:00628:00792
TTGTGGTCGGGAGTACAATTTCAG

>UDNZI:00641:00762
ATGTAACCCATACCACAATCGAGA

>UDNZI:00647:00795
ACGCCAATTGTGCGATAGGATACA

>UDNZI:00612:00888
GTTCGAACTGTATCTTAAATTACA

>UDNZI:00627:00887
TTGTATCCTAGATTACTATCGGGT

>UDNZI:00642:00871
TTCTGGTTTGTAGCTTGCATCACT

>UDNZI:00642:00881
CACCCAATTGTATCATAGCATTCA

>UDNZI:00611:00983
AATTACTTTGTAAGCCGCGCTACG

>UDNZI:00615:00963
AAACAAAAAGTATCCGTGGATACG

>UDNZI:00616:00993
ACGCTAAATGTATTCCCCATTACT

>UDNZI:00617:00972
GCTAAAACTGTAGCTTCGGCTACA

>UDNZI:00632:00969
CCTTTAACCGTATGCCCACTTACA

>UDNZI:00646:00994
TTGTACGCTACAACACAATTCCTT

>UDNZI:00603:01012
ATTTTTTTTGTATCCTAGCCACAT

>UDNZI:00609:01008
ATACTTTCTGTATTACACATCACA

>UDNZI:00628:01008
CTTATCCGACCATCCCCACTGCTA

>UDNZI:00634:01038
CATGGCTTTGTGTCATGTGCTACA

>UDNZI:00637:01048
CTCACGACTGTGCTTTAGGTTACA

>UDNZI:00607:01078
GCCGCAATTGTGTCTTAGATCACA

>UDNZI:00611:01090
TTGTATTACGGCATACAATCAATT

>UDNZI:00617:01099
GGTCAAACTGTGACTTGGACCACA

>UDNZI:00619:01090
ATTGTAGTCTAGATCACACTTCGG

>UDNZI:00642:01091
GTTTACACCGTGCCCTAGACTACA

>UDNZI:00647:01073
CCTAAAATTGTGCTCCAGATTACA

>UDNZI:00604:01131
ACTCCGATTGTAGCCAGGCATACA

>UDNZI:00607:01145
CTCTCTTTCGTAACATAGACTACA

>UDNZI:00643:01135
TAAAACTTTGTATGCACCGACACT

>UDNZI:00648:01103
ATTGAAATTGTAGTCGGGGACACA

>UDNZI:00665:00039
TGTTACAATGTAATCGGGGATACA

>UDNZI:00655:00087
GACAAAACTGTGATGTTCACTACA

>UDNZI:00656:00075
AGTGTCTCGGCATCCCTGTATTAC

>UDNZI:00659:00088
CTCTACTTTGTATGCTGGGATACT

>UDNZI:00661:00054
GCTCTGATTGTGTCCCCAGTCACT

>UDNZI:00663:00066
TAACGGTTTGTACTCTACGCTACT

>UDNZI:00674:00067
TGCTTAATTGTGGCCTATGACACA

>UDNZI:00696:00064
ATTTCCGCGCATCCTGAAGACCTT

>UDNZI:00662:00115
ATGGGAATTGTGTCCTTGGCTACA

>UDNZI:00677:00107
AATAAAAAAGTAGCGCCAGATACA

>UDNZI:00683:00307
TCTTTAACTGTGACCTGTCCTACA

>UDNZI:00691:00354
TTCAAGATTGTAGTGCACCATACA

>UDNZI:00653:00401
CTTTGACCTACATCCGAACTGGCC

>UDNZI:00684:00449
AATCTGATCGTAATGTGGGATACA

>UDNZI:00654:00474
TATAAAAATGTATTGCAGCATACC

>UDNZI:00694:00472
GTTCAAATAGTGCTCCATGTTACA

>UDNZI:00656:00540
TTTTAATTTGTGGTTTACGTCACA

>UDNZI:00688:00537
ATAATATTTGTAACATAGAACACA

>UDNZI:00655:00576
TTGTACTCGACAATACAATTTGGT

>UDNZI:00657:00564
AGAGAGTTTGTGTCCGTGCTTACA

>UDNZI:00672:00577
GTTAGGATTGTGTGCTATAGTACT

>UDNZI:00684:00592
AATTGTCTTGTGACCTAGGTCACA

>UDNZI:00651:00689
TTAATAAATGTAGCCTACGTCACT

>UDNZI:00660:00678
TTGTGTCTCTCACTACAATTTTCA

>UDNZI:00675:00657
TTCCCAATTGTGATCGAGACTACT

>UDNZI:00676:00655
ATTAGGAATGTGTAGTGCGTTACA

>UDNZI:00651:00886
GAAAAAAATGTATTCTGTCTTACG

>UDNZI:00651:00891
TTGTAGCCTAGATCACAATACTCG

>UDNZI:00657:00875
ACACTATTCGTAAGCTGGCGTACA

>UDNZI:00670:00887
ATGAGTGTATTCTAGCATACAATC

>UDNZI:00692:00860
TAGAAATTGTGTTATAGACTACAA

>UDNZI:00693:00852
GTCTACCTTGTATCCTGCGATACA

>UDNZI:00693:00881
CATGATCCTGTATTCCAGATCACA

>UDNZI:00661:00919
ACTGAATTGCTAGCAATGCATACA

>UDNZI:00665:00916
CTCACAACTGTATCGTATCATACA

>UDNZI:00676:00908
TATCGAAATGTACTGCTTACTACA

>UDNZI:00698:00938
TTAGCCAATGTATTGCAGACTACA

>UDNZI:00669:00954
TATAGAATTGTGTTCTGGCCCACG

>UDNZI:00678:00958
ACATAGTTTGTGGCGCAGGTTACT

>UDNZI:00696:00981
GCTTTTGTAACGTGCACTACACTT

>UDNZI:00651:01031
CAAAGATTGTATTACTGCATACTA

>UDNZI:00674:01030
TCCGCAGATTGTATTCGGGGCCAC

>UDNZI:00680:01035
TAAACTGTATCGCAGCCTACTATT

>UDNZI:00688:01019
ACGACAATTGTACCACAGGCCACA

>UDNZI:00695:01048
TTGTAAGCCAACCTACAATACTAA

>UDNZI:00666:01171
ATCCCGATTGTGGTCTGGCTTACA

>UDNZI:00673:01154
TTGTATCCGGAGATACAAATGTCA

>UDNZI:00683:01153
GTTCAGTTTGTATTATAGGATACG

>UDNZI:00697:01183
GGTTTGATTGTATTTCAGCCTACG

>UDNZI:00694:01243
GAAAAAATGTATCCCATAATACAA

>UDNZI:00707:00070
AAGTGTTTCGTATTCAGAGCTACA

>UDNZI:00732:00062
ATCCACTCTCCATCCAATGTAATG

>UDNZI:00740:00068
GTCCTAAATGTAGTCCATGCTACG

>UDNZI:00704:00120
ATTTACTTTGTATCCTAAGACACG

>UDNZI:00714:00122
CACGTACTTTGTGTCCCAGGTTAC

>UDNZI:00715:00130
TTTTCGATTGTATGCCATATCGCA

>UDNZI:00745:00114
GTTAGGTTTGTAACCTGAACTACA

>UDNZI:00711:00187
CACTCGAATGTGCTCTCAACCACA

>UDNZI:00730:00169
TATTACATTGTAAGCTATGCCACA

>UDNZI:00702:00255
ACTGAAAATGTATCCCGGACCACA

>UDNZI:00708:00274
TAACAAATTGTAGCCCTGACTACT

>UDNZI:00710:00285
TTGTAGCTTGGATCACATTCATGG

>UDNZI:00711:00276
CCTAGACTTGTGGTCCACAGTACA

>UDNZI:00708:00330
CTGAAATCGTGACCTGGACTACAC

>UDNZI:00733:00310
AGCAATTGTGACTTAACTTACAAT

>UDNZI:00715:00417
TCGCAATACGTGTCCTACACTACA

>UDNZI:00716:00427
GATGTGTTTGTACGCTGTATTACG

>UDNZI:00720:00443
TACACAAATGTATTCTGGCTTACT

>UDNZI:00700:00490
ATTGCGATTGTAACCCCTCATACT

>UDNZI:00733:00450
ATATCAATTGTAGTCTGTATGCAT

>UDNZI:00735:00456
TTCACGATTGTATGCTAGGATCCC

>UDNZI:00739:00520
ACCTAGACTGTGAGATAGATCACA

>UDNZI:00721:00590
TATATACCTGTATTCCACAATACA

>UDNZI:00734:00587
AAACACATTGTATACTGCATTACA

>UDNZI:00735:00582
CACCTAATTGTAGTCCACGCCACA

>UDNZI:00744:00555
ATTTGTGTAGTCTAGGCTACGGTT

>UDNZI:00700:00682
CCACGAATTGTATCCCTTGCCACA

>UDNZI:00736:00686
CACTGTGTCTTGTCTTACAATCGT

>UDNZI:00744:00652
TTCAAAATGTATTTGAGATCACAC

>UDNZI:00748:00650
CAGAGTGTGGCTTGGAATACATAT

>UDNZI:00708:00887
CTCTCCATTGTAACTTGCGCTACA

>UDNZI:00735:00853
TTGTGACGTGGAACACAATTTCTT

>UDNZI:00744:00873
CTGAACTTTGTACCCCATCGTACA

>UDNZI:00707:00941
CAATTGTGATCCAAGGTACAATTG

>UDNZI:00718:00902
CTGTAACCGGGAATACACTTAACA

>UDNZI:00723:00914
GTCTAATTTGTATCCAGCCCTACA

>UDNZI:00744:00940
AAAAAGCCTTCATCCTCCGATTAC

>UDNZI:00746:00913
AGTCATACTGTGAGCTAGCTTACA

>UDNZI:00735:00991
CAGATTCTGTACCCCAGGATACAA

>UDNZI:00702:01018
CAAAAACTTGTATGCTAGGTCACC

>UDNZI:00704:01015
AATGCTATTGTACGCCACGATACT

>UDNZI:00733:01000
AATTCGTGTGTAACCTAGAATACA

>UDNZI:00738:01012
TTGTGACCTAAGATACACAACTTC

>UDNZI:00716:01053
ACATCAACTGTATGATACACCACA

>UDNZI:00716:01062
AGGGAGTTTGTGTTGCAGACTACA

>UDNZI:00737:01092
TTGTCATTTGTATCGCGCGCCACA

>UDNZI:00739:01065
GCAGAATTGTCATCCAAATCACAA

>UDNZI:00703:01178
GCATAAATGCATCCTAACATACAA

>UDNZI:00718:01177
ATTGATTTGTAACCTGGAACACAT

>UDNZI:00723:01192
TTCCAGATTGTGTCACGAAATACA

>UDNZI:00763:00098
ACAGACAACGTGGTTTGGCATACA

>UDNZI:00762:00148
TTGTGCCCTGGACCACAGTTGCCT

>UDNZI:00772:00101
CTTCAAATTGTATCCTGGACCCCA

>UDNZI:00789:00104
TTGCCAATTGTATTTACAAATACA

>UDNZI:00778:00242
CACTAGATTGTGTTTCGTGCCACA

>UDNZI:00781:00240
CTCTCGATTGTAATGTGAATCACA

>UDNZI:00787:00225
GAGCAAATAGTATGCCCTATTACA

>UDNZI:00756:00281
TTGTGCCCCAGAACACATTTACAC

>UDNZI:00764:00252
GAATCAATTGTGCCCCCTAATACG

>UDNZI:00775:00269
TTGTGGCCCAAGATACAGTTCCGC

>UDNZI:00759:00307
GACCCATCTGTGACCTGCATTACA

>UDNZI:00789:00308
ATGTATCCCCCGATACAAACGAGG

>UDNZI:00769:00365
TCAGCACACCCATCCGTCCACCGC

>UDNZI:00773:00362
GGGTTCTATGTATCCTAGCCCACA

>UDNZI:00785:00356
GACCACACTGTATGCTACATTACT

>UDNZI:00797:00375
CGAGCCTTTGTATTCTGAGTCACT

>UDNZI:00757:00407
AAGGGGAGTGTAGTTTGCATTACA

>UDNZI:00758:00417
TGACCAATGTGTTCCAGCATACAT

>UDNZI:00759:00418
TGCGATTTGGTAGTCCAGGTTACA

>UDNZI:00760:00402
ATTATTGTATTATAGCATACATTT

>UDNZI:00750:00490
TCGGGGATTGTATGTCCGCATACT

>UDNZI:00753:00450
TCATTGTATCCCGTAATACAGTCT

>UDNZI:00754:00479
CCTGCCACTGTAGCCCAGAGCACA

>UDNZI:00784:00455
GTACGAACTGTCATCTAGGATACT

>UDNZI:00787:00475
ACATAATTGTGACTTATAACACAA

>UDNZI:00792:00494
CCTACACGCGCATCCATGAGTCAT

>UDNZI:00760:00545
TTGTATTCCCGCTTACACTCACCA

>UDNZI:00762:00537
CAAATCATAGTATGCTGCGTTACA

>UDNZI:00769:00528
TTAATCAATGTATGTTGGCATACA

>UDNZI:00776:00536
CTCGAAATTGTGTCTGCCAATACA

>UDNZI:00781:00537
GGCAACTATGTAGTGCATACTACA

>UDNZI:00770:00580
TCACGGAATGTAACCAGGAGTACA

>UDNZI:00790:00575
TTGTATGCTACGTTACATTCTGTC

>UDNZI:00754:00601
TTCAAAATTGTAGGTCACGGTACA

>UDNZI:00771:00616
TGCCCATTTGTAACTCAGCATACA

>UDNZI:00777:00614
TTGTAGTCTGGGTTACATTTCCTC

>UDNZI:00777:00617
TTTTACATTGTGATCTACCATACT

>UDNZI:00793:00647
ATATAGATTGTATCCGGCGATAAC

>UDNZI:00769:00882
TAAAAAATTGAATGCCACGTTACA

>UDNZI:00780:00852
TCTTAGATTGTAGCCCCCGACACT

>UDNZI:00765:01013
CAATGAGCCTCATCCTCTGCGCCG

>UDNZI:00778:01047
CACTTAATCGTAGTCCGTGCTACA

>UDNZI:00782:01022
TCTCTGATTGTATCGTGTCTTACT

>UDNZI:00785:01029
GTGTAGTTTGTAACGTGCAACACT

>UDNZI:00766:01069
CAACAAAATGTGTGCTGGATTACT

>UDNZI:00772:01066
TATATAATTGTACCGTGTGATACA

>UDNZI:00791:01057
TTGTAGCCGTAGTCACAATTTATG

>UDNZI:00800:00134
GCCGCTATTGTATCCGATGATACA

>UDNZI:00833:00191
ATGCTGACTGTATGGTACCACACA

>UDNZI:00836:00157
GTCAAGATTGTAACGTTGCGTACA

>UDNZI:00806:00336
TTTTTGTGACTCACGATACATTCC

>UDNZI:00816:00308
TTGTAATCAGGGATACAATACCTT

>UDNZI:00824:00346
GTTATAACTGTATTTTGGCACACA

>UDNZI:00844:00439
CAGCAGATTGTATGCTGTGCTACA

>UDNZI:00814:00496
GTCAATAGTATTCTACAGCACATT

>UDNZI:00823:00491
TCAAATATTGTGTTCCAGGCCACA

>UDNZI:00801:00591
CAATTTGTATCGCAGCTTACAGTT

>UDNZI:00802:00585
GCCCGAAATGTGGTCCAGCCCACT

>UDNZI:00839:00556
TAATGGATTGTGTCGCTTAATACA

>UDNZI:00848:00597
CCTGTAATTGTAGCCCGGCACACA

>UDNZI:00805:00683
GACCTCTTTGTATCCTAGTTCACT

>UDNZI:00813:00676
TACTCAATTGTACCGCTGCGTACA

>UDNZI:00814:00696
AATATAATTGTAATGTCCGCTACA

>UDNZI:00822:00666
GTCAAAATCGTATCCTCAGTTACA

>UDNZI:00822:00679
AAGAAAGTGTGTGCTGCCATACAG

>UDNZI:00825:00658
TCGCCAAATGTATTATGGAGTACA

>UDNZI:00837:00672
TATAAAATTGTATGATAGCATGCA

>UDNZI:00839:00657
GTTCGGATTGTGGCCCCCGCTACT

>UDNZI:00844:00696
TTCTAGACTGTATTTTGTGTTACA

>UDNZI:00806:00759
CAAACTGTATTCTCCAATACATTC

>UDNZI:00809:00792
TGAGTGACTGTATCCCAAATCACA

>UDNZI:00823:00781
CCCAAATCTGTAATACGGCGTACA

>UDNZI:00837:00758
CTGTGTTGTAGAATACAATGTTGG

>UDNZI:00838:00776
TTGTATGTCCCGTCACAATTATAG

>UDNZI:00816:00883
TTAGAGTTTGTAGGATGGGCTACA

>UDNZI:00823:00871
CACCTTTCACCATCCGAGGGTCTA

>UDNZI:00829:00874
ACAATGATTGTAATGCAGAACACA

>UDNZI:00809:00979
TTACTATGTGTCCCAGCATACAGG

>UDNZI:00812:00969
GAGGACTCTGTATCCCATATTACT

>UDNZI:00829:00950
TCCAGGTGGTCATCCAGGTTATTG

>UDNZI:00839:00957
AAGATTGTCGTTCAGGTTACAATT

>UDNZI:00834:01036
CCGATAATGTCATCCAGATTACAA

>UDNZI:00818:01052
TAGGCCATTGTGTTGCGGGCTACA

>UDNZI:00802:01151
GCCAACTTTGTATGATCGGTTACA

>UDNZI:00807:01192
CTTACCTTTGTATTCCCTGATACA

>UDNZI:00825:01157
CTGTGGACTGTAGCATGCGCTACA

>UDNZI:00836:01165
CCCCGAAAATGTAGTCTGAGTTAC

>UDNZI:00839:01173
CCACTGATTGTACCCAGTGATACA

>UDNZI:00845:01157
AAACAGATTGTATTCCCTGTTACT

>UDNZI:00885:00234
CTATCTTTTGTATCCTGGAATACG

>UDNZI:00859:00330
ACAGCAATTGTAGCGTACGACACT

>UDNZI:00862:00334
TTGTATTGTACGATACGATCGGAC

>UDNZI:00869:00325
GTTACCACTGTAGTGTGGCATACA

>UDNZI:00855:00442
CCCTATTCTGTACGCTAGCATACA

>UDNZI:00897:00437
TCGCGAACTGTGGCCCAGGGTACT

>UDNZI:00869:00497
AATGATTCGCATCCACCCCACTCG

>UDNZI:00870:00464
ATTGTATTGCATGATACAATTGCT

>UDNZI:00853:00511
TACTTCGATTGTGTTCCCCGTTAC

>UDNZI:00893:00523
GTCATCTTTGTACTCCCCGCTACA

>UDNZI:00860:00580
GAGGAAACTGTTGCCCGGACTACA

>UDNZI:00869:00568
AAGAATTTTGTAAGCTGGACCACT

>UDNZI:00878:00565
CTCTCATTTGTACTCTACGTTACA

>UDNZI:00883:00598
GACTGTGTTCCGTATTACAGTTTA

>UDNZI:00857:00677
ATGACTATTGTATCTCAGATTACA

>UDNZI:00861:00657
AATAAAATAGTGGTGGAGGTCACA

>UDNZI:00876:00698
TTACACTTTGTAACATAAACTACA

>UDNZI:00898:00664
TGAGATTTGTATGGTAGCCTACAT

>UDNZI:00852:00752
AATACGGTTTGTATGCGGGAACAC

>UDNZI:00859:00774
CAGTAAAAAGTAATGGTCATTACA

>UDNZI:00866:00776
ATGTAGCCTTGACTACAATCAGCT

>UDNZI:00882:00783
CAAACTGTAACCTGCGACACATTT

>UDNZI:00884:00759
TTATCAATGTATCCTACGTTACAC

>UDNZI:00888:00754
GCGTAGTTTGTATTACAGGCCACA

>UDNZI:00888:00770
GAATGGACCCCATCCAAGTTGTTA

>UDNZI:00892:00770
TTCTTAATTGTATCTTGAACTACT

>UDNZI:00895:00794
ATAAAGTTTGTAATCCCGCATACA

>UDNZI:00897:00767
TCAGAGCTGCCATCCTTACTGCTC

>UDNZI:00851:00806
ACGTGTTATGTATCCCATAATACA

>UDNZI:00884:00828
AACACGCATCCAATAGGCTGATCC

>UDNZI:00888:00807
CACCTGATTGTGACTTGTGACACT

>UDNZI:00860:00936
AACGTAATTGTAACTCACATTACA

>UDNZI:00866:00906
TTGTGACCTACGATACAATGTCTG

>UDNZI:00863:00951
GATTAGTTTGTATCCCTGATTACA

>UDNZI:00867:00950
CCCACGTTTGTAATCCAAATTACT

>UDNZI:00892:00979
TGGTTTGTGGCCTGTATTACATAA

>UDNZI:00896:00964
ATTTCGATTTGTAATCCAAAATAC

>UDNZI:00897:00962
CAAGAGATAGTGCCCCAGATCACA

>UDNZI:00891:01248
TACTTAATTGTAGTCCAAACTCAA

>UDNZI:00894:01247
ATCGGAATTGTATCTCACAATACT

>UDNZI:00935:00219
TAGTTCATTGTGCTCTCCACCACA

>UDNZI:00924:00273
CGGGAGATTGTAGTTGACCATACA

>UDNZI:00942:00282
TTGTATTTCAGACCACAGTTACGC

>UDNZI:00905:00329
TTCTTAATTGTGACCCAAGCTACT

>UDNZI:00908:00300
GATTTTTCTGTAGCCCGTACTACA

>UDNZI:00917:00339
CGATTGTAAGCAGGACTACATTCG

>UDNZI:00946:00318
CACATGATAGTATGCCATCTTACA

>UDNZI:00901:00353
TCCGTCAGTGTAATCTAGCATACA

>UDNZI:00921:00374
AATCTAAATGTAAGCGAAATTACA

>UDNZI:00924:00397
TGTGCTTTTGTAATCCAGGCTACT

>UDNZI:00939:00361
ATGCGCCCTCATCCAAGTTCTTAT

>UDNZI:00903:00410
GATAAAATTGTGGCCCGGCGTACA

>UDNZI:00906:00444
GCTACAAATGTGCCCTGCGACACT

>UDNZI:00917:00444
ATGGACACTGTACGCTATAATACA

>UDNZI:00923:00407
CGTAGAATGGTAGTCTAGATCACA

>UDNZI:00931:00400
AATTAGAAGGTAGCCTGAAATACA

>UDNZI:00936:00443
TTGTAATCCGGAATACATTTTGCC

>UDNZI:00936:00445
CCTTGGTTTGTATCATGGGCTACA

>UDNZI:00947:00414
TAGCATTGTAGGCTAGCTTACTAA

>UDNZI:00935:00508
ATTAGAATCGTGCTACAGGTTACA

>UDNZI:00935:00520
ATTGCCATTGTATTACGGGACACA

>UDNZI:00936:00535
CTTGACATTGTAGGGTGGAGTACA

>UDNZI:00940:00538
GTGGCAATCGTGGCCTACGATACA

>UDNZI:00942:00518
CCGTGGACAGTAGCCTAGCATACA

>UDNZI:00931:00581
GCATCAATTGTGGTGCACACTACT

>UDNZI:00908:00750
ATGTGTCCTGGATCACAAAGCGCG

>UDNZI:00926:00762
TCGTAATATGTATTCTATATTACA

>UDNZI:00926:00793
AAGTCGTTTGTCATCCAGATCACA

>UDNZI:00938:01121
CCTCTTCTTGTATCCTAGAATACA

>UDNZI:00924:01174
GAGGTTCTTCATCCTGTTGTATAC

>UDNZI:00932:01190
ATCAGAAGTGTGATCCTCATTACA

>UDNZI:00945:01175
GGTACAACTGTGCTCCCGCTTACA

>UDNZI:00954:00284
TATAACTTTGTGCTTTGTATTACA

>UDNZI:00954:00285
GAATTTCTTGTAGCCTCGCATACA

>UDNZI:00978:00290
TTGTAAGCTGAACTACAATTGGTA

>UDNZI:00996:00261
AAGAATTGTATCCCAGCACACACT

>UDNZI:00959:00444
GCCATGATTGTATTTCAAGCCACA

>UDNZI:00995:00449
AGAAACATTGTGACTTCGACCACA

>UDNZI:00998:00413
TAATAAATTGTAGCCTCCCATACA

>UDNZI:00981:00465
CCTTAGAATGTAACCGGGGACACA

>UDNZI:00960:00595
TTCAGAAAAGTAGTGCCAAATACT

>UDNZI:00963:00557
CAGGCAATTGTGCCCTGGGATTCT

>UDNZI:00969:00579
GAGTACTCTGTATGCTCGGTTACA

>UDNZI:00992:00585
TTGTGCTCCAGACTACAGATCCTA

>UDNZI:00960:00610
TTGTGCCTTGGGTTACAATCTCAC

>UDNZI:00960:00626
GTGGTGTGTGATCTAGGTCACAAT

>UDNZI:00960:00640
TTTAAACTTGTATCTCAGGCCACA

>UDNZI:00960:00644
GAGCTAATTGTGGTGTAACGTACA

>UDNZI:00962:00645
CTTTCTCTTTGTGACTTGGCATAC

>UDNZI:00968:00622
AATACAATTGTAGGTCACAATACA

>UDNZI:00976:00604
GTTAGAACTGTATGATACACCACT

>UDNZI:00977:00642
TTCTCGTTTGTATTTTGCGATACA

>UDNZI:00980:00638
ATGTAACCTGAATTACAATAGCTG

>UDNZI:00990:00631
ATCATGACTGTAATGTAAGTTACA

>UDNZI:00955:00709
CCGTTCACTGTATTCCAACATACA

>UDNZI:00956:00740
ATCCAAACTGTAGTGTACGTTACA

>UDNZI:00958:00724
AACGAGGCTGTATTCTAGACTACA

>UDNZI:00963:00712
CGAATGATTGTAGCCTGTATTACT

>UDNZI:00972:00747
TTGTCGCCCAGCATACAGTTGCGC

>UDNZI:00960:00862
CTACCGATTGTGAGCCCGGTTACA

>UDNZI:00976:00920
GTCTTACCTGTAACATGGAATACA

>UDNZI:00998:00913
CGCGGGATTGTAGGCTAGCTTACC

>UDNZI:00966:01034
CTGATGATTGTAGTGCGGAGTACA

>UDNZI:00967:01016
TATCGATTTGTACTCTAGCCTACG

>UDNZI:00975:01009
TATGTAAACGTAGCCGGGACCACA

>UDNZI:00976:01006
TTCTTGATTGTGTCGCAGAGTACT

>UDNZI:00989:01042
CGCTCGTTTGTATCCCGGGATACC

>UDNZI:00984:01090
ATTTGACATGTGTCCGGGGACACA

>UDNZI:00988:01096
TTCCGGATTGTAATCTGCATTACT

>UDNZI:01002:00302
CGCGAAATTGTAGGGGACGCTACA

>UDNZI:01014:00328
CCTAATTGTGTTCCCAGCTACACT

>UDNZI:01012:00361
TGCCTACTTGTGCCCTGGGGTACA

>UDNZI:01016:00355
TTCGCTATTGTACTGCAGGATACA

>UDNZI:01046:00393
TTTCCAAATGTATTATGGAATACC

>UDNZI:01006:00622
CCAAAAATTGTATGCCATACGACA

>UDNZI:01008:00641
TTTGGGATTGTACCGTGGAGCACA

>UDNZI:01019:00640
GTCCAACTGTAGTATTCAATCACA

>UDNZI:01029:00626
GGAATTGTGACCCCGGTTACACTA

>UDNZI:01041:00633
CGTTGAATTGTACTCCGACCTACA

>UDNZI:01003:00680
ACCTGTGTCCTGGCATACAATCTC

>UDNZI:01006:00686
CACCCTAAATGTATCCCCCGCCAC

>UDNZI:01010:00677
CACCAAATTGTGGGCCCCGCTACA

>UDNZI:01019:00669
TTGTATCGTAAGCTACAAACGCTT

>UDNZI:01021:00662
ACTTACTTTGTGTCTTCGGATACA

>UDNZI:01025:00663
ACTAATATGTAGTGTGCGCTACAG

>UDNZI:01035:00693
TTTTCGAATGTACTGAGGAATACA

>UDNZI:01041:00684
TTTAGGAAAGTGGCACAGGATACA

>UDNZI:01042:00691
CTGTAGTCTGGGCTACTATGTGTT

>UDNZI:01049:00657
AAATTTACTGTATTCCAGGCTACA

>UDNZI:01049:00682
ACAATCGTGCTCTAGCATACAATC

>UDNZI:01003:00868
TTGTAATCTGCAACACAATCGTTA

>UDNZI:01013:00885
AATTACCTTGTAGCCCAGGTTACA

>UDNZI:01042:01082
TGGGCGTTGTAGCCTGGCATACAA

>UDNZI:01046:01085
GTGAACATTGTGGGCTGCACTACA

>UDNZI:01024:01158
TTGTATGCTATGTTACAATCTCTT

>UDNZI:01017:01257
TTGTACGCCTGGCTACAGTTTCGC

>UDNZI:01045:01273
GTGTGGTCTGGCATACACTCTCAG

>UDNZI:01055:00372
CGTCAAACTGTATCGCACGTTACA

>UDNZI:01072:00373
AGTCTAAGTGTAACATGCCATACA

>UDNZI:01056:00428
ACCAAGAATGTAATCGAAGGCACA

>UDNZI:01070:00416
ATTTAGAATGTGTTCTCCAATACA

>UDNZI:01085:00417
GCTAAATTGTAGTACAGAGCACAG

>UDNZI:01093:00449
TTGTATCCTGCACTACATTGGCCG

>UDNZI:01051:01125
TTGTGGTCTACAATACTAATAGCG

>UDNZI:01060:01102
GAGTAGTTTGTAACCAAGCCTACA

>UDNZI:01062:01130
AGTGGTAACTGTGTCTTGGCATAC

>UDNZI:01090:01144
CTAATCATTGTACTATGCGATACA

>UDNZI:01062:01183
TAGGAACTTGTATTGCACGTCACA

>UDNZI:01051:01203
CATAAGATTGCATGACAGCGCACA

>UDNZI:01066:01240
AGGTTTACCCATCCACTGTCCTGC

>UDNZI:01116:00873
GAAAACTTTGTATTCTACAATGCA

>UDNZI:01131:00888
ACTAGAATGTAACCTAGAATACAC

>UDNZI:01140:00876
ATGAAGATTGTATTATGGATTACT

>UDNZI:01127:01162
AACATACTTGTAATCAGGGCTACA

>UDNZI:01102:01202
TGCGCGATTGTGCGATACACTACA

>UDNZI:01126:01225
CGACTAATGCCATCCGCTCCTGGT

>UDNZI:01146:01240
CAACAGTAAGTATGCTGAGATACA
