# Supplementary material for: Determination and Dissection of DNA-Binding Specificity for the Thermus thermophilus HB8 Transcriptional Regulator TTHB099
Source: Int J Mol Sci. 2020 Oct 26;21(21):7929. doi: 10.3390/ijms21217929 (PMC7662524; doi:10.3390/ijms21217929)
Supplement: Supplementary file 1 [file ijms-21-07929-s001.zip › Table S2.xlsx]

## Sheet: Sheet1
ID	adj.P.Val	P.Value	t	B	logFC	ORGANISM	ORF
TT5orR4099_at	7.03e-05	4.53e-08	-30.2716	9.1122	-6.0167	Thermus thermophilus HB8	TTHB099
TT5orF1499_at	7.03e-05	6.47e-08	28.5995	8.85546	5.06726	Thermus thermophilus HB8	TTHA1499
TT5orF7078_at	7.03e-05	7.43e-08	-27.9783	8.75339	-5.46922	Thermus thermophilus HB8	TTHY7078
TT5orF1500_at	7.03e-05	8.05e-08	27.6191	8.69261	5.23067	Thermus thermophilus HB8	TTHA1500
TT5orF1836_at	0.0001517	2.17e-07	23.5675	7.90465	4.42294	Thermus thermophilus HB8	TTHA1836
TT5orF7058_at	0.0002068	3.79e-07	-21.5554	7.43007	-3.69951	Thermus thermophilus HB8	TTHY7058
TT5orF1498_at	0.0002068	4.15e-07	21.2487	7.35195	4.38354	Thermus thermophilus HB8	TTHA1498
TT5igF0501_at	0.0002743	6.29e-07	19.8747	6.98106	2.62782	Thermus thermophilus HB8
TT5igR0672_at	0.000329	8.48e-07	-18.9399	6.70749	-3.63753	Thermus thermophilus HB8
TT5orF1448_at	0.0003335	9.55e-07	18.581	6.59749	3.81026	Thermus thermophilus HB8	TTHA1448
TT5orF7062_at	0.0004666	1.47e-06	-17.3329	6.19168	-3.20427	Thermus thermophilus HB8	TTHY7062
TT5orR1407_at	0.0005916	2.03e-06	16.4479	5.88004	2.56051	Thermus thermophilus HB8	TTHA1407
TT5orF1840_at	0.0006249	2.33e-06	-16.093	5.74899	-2.62991	Thermus thermophilus HB8	TTHA1840
TT5igR0653_at	0.0008015	3.21e-06	15.2721	5.43153	5.72685	Thermus thermophilus HB8
TT5orR1404_at	0.0009528	4.68e-06	14.3649	5.05544	1.999	Thermus thermophilus HB8	TTHA1404
TT5orF1449_at	0.0009528	4.76e-06	14.3292	5.04004	2.51033	Thermus thermophilus HB8	TTHA1449
TT5orF1839_at	0.0009528	5.07e-06	-14.1804	4.97544	-2.59341	Thermus thermophilus HB8	TTHA1839
TT5orF1447_at	0.0009528	5.34e-06	14.0601	4.92262	2.96277	Thermus thermophilus HB8	TTHA1447
TT5igR0313_at	0.0009528	5.49e-06	13.9993	4.89574	2.13191	Thermus thermophilus HB8
TT5orF1137_at	0.0009528	5.67e-06	13.9254	4.86285	2.29974	Thermus thermophilus HB8	TTHA1137
TT5orF7040_at	0.0009528	5.73e-06	-13.9012	4.85205	-2.44367	Thermus thermophilus HB8	TTHY7040
TT5igR0589_at	0.0010556	7.09e-06	13.4267	4.63554	2.64258	Thermus thermophilus HB8
TT5orF1838_at	0.0010556	7.16e-06	-13.4045	4.62522	-2.46529	Thermus thermophilus HB8	TTHA1838
TT5orF1706_at	0.0010556	7.25e-06	13.3758	4.6118	3.76538	Thermus thermophilus HB8	TTHA1706
TT5orR1651_at	0.0011712	8.38e-06	13.063	4.4635	2.15386	Thermus thermophilus HB8	TTHA1651
TT5orF1135_at	0.0012732	9.54e-06	12.7893	4.3304	4.26927	Thermus thermophilus HB8	TTHA1135
TT5igR0545_at	0.0012732	1e-05	12.6844	4.27853	2.27368	Thermus thermophilus HB8
TT5orF4120_at	0.0012732	1.06e-05	12.5702	4.22153	2.24951	Thermus thermophilus HB8	TTHB120
TT5orR0247_at	0.0012732	1.11e-05	-12.4814	4.17679	-2.37763	Thermus thermophilus HB8	TTHA0247
TT5orF1501_at	0.0012732	1.12e-05	12.4587	4.1653	3.1328	Thermus thermophilus HB8	TTHA1501
TT5orR1141_at	0.0012732	1.13e-05	12.439	4.15531	2.43519	Thermus thermophilus HB8	TTHA1141
TT5orR1402_at	0.0012885	1.21e-05	12.3036	4.08612	1.88667	Thermus thermophilus HB8	TTHA1402
TT5orR1650_at	0.0012885	1.23e-05	12.2599	4.06364	2.10763	Thermus thermophilus HB8	TTHA1650
TT5orF0981_at	0.0012885	1.27e-05	12.2015	4.03342	1.85956	Thermus thermophilus HB8	TTHA0981
TT5orF1136_at	0.0012885	1.29e-05	12.1695	4.01679	1.9103	Thermus thermophilus HB8	TTHA1136
TT5orF1956_at	0.0013974	1.44e-05	11.9526	3.90284	2.18191	Thermus thermophilus HB8	TTHA1956
TT5orR1759_at	0.0014677	1.56e-05	11.803	3.82288	3.16899	Thermus thermophilus HB8	TTHA1759
TT5orF1629_at	0.0016782	1.83e-05	-11.4942	3.65437	-2.34382	Thermus thermophilus HB8	TTHA1629
TT5orR1652_at	0.0017199	2.07e-05	11.2608	3.52371	1.78741	Thermus thermophilus HB8	TTHA1652
TT5orR1405_at	0.0017199	2.09e-05	11.2399	3.51188	1.64064	Thermus thermophilus HB8	TTHA1405
TT5igR0751_at	0.0017199	2.11e-05	11.2238	3.50272	2.7144	Thermus thermophilus HB8
TT5orR4098_at	0.0017199	2.17e-05	11.1669	3.4703	1.74461	Thermus thermophilus HB8	TTHB098
TT5orR1678_at	0.0017199	2.19e-05	-11.1558	3.46398	-2.19735	Thermus thermophilus HB8	TTHA1678
TT5orF1955_at	0.0017199	2.29e-05	11.0708	3.41517	1.64938	Thermus thermophilus HB8	TTHA1955
TT5orR1679_at	0.0017199	2.31e-05	-11.054	3.40552	-1.94837	Thermus thermophilus HB8	TTHA1679
TT5orR0212_at	0.0017199	2.33e-05	-11.0391	3.3969	-2.16742	Thermus thermophilus HB8	TTHA0212
TT5orR1066_at	0.0017199	2.34e-05	-11.0338	3.39382	-1.82351	Thermus thermophilus HB8	TTHA1066
TT5igF0319_at	0.0017199	2.39e-05	10.9972	3.37264	2.10046	Thermus thermophilus HB8
TT5orR1036_at	0.0017199	2.48e-05	-10.9282	3.33243	-1.58308	Thermus thermophilus HB8	TTHA1036
TT5igF0247_at	0.0017199	2.51e-05	-10.9072	3.32021	-1.40176	Thermus thermophilus HB8
TT5orF1469_at	0.0017199	2.51e-05	-10.9035	3.31801	-2.03263	Thermus thermophilus HB8	TTHA1469
TT5orF0526_at	0.001826	2.74e-05	10.7483	3.22644	1.50637	Thermus thermophilus HB8	TTHA0526
TT5orF1628_at	0.001826	2.78e-05	-10.723	3.21138	-2.94731	Thermus thermophilus HB8	TTHA1628
TT5orR1474_at	0.001826	2.85e-05	10.6755	3.18299	1.73149	Thermus thermophilus HB8	TTHA1474
TT5orR1477_at	0.001826	2.88e-05	10.6612	3.17442	1.79676	Thermus thermophilus HB8	TTHA1477
TT5igR0326_at	0.0019134	3.11e-05	10.5212	3.08995	2.46249	Thermus thermophilus HB8
TT5orR1465_at	0.0019134	3.12e-05	-10.5159	3.08672	-1.92434	Thermus thermophilus HB8	TTHA1465
TT5igF0141_at	0.002099	3.49e-05	10.3251	2.96958	1.59134	Thermus thermophilus HB8
TT5orF0663_at	0.0021048	3.58e-05	10.2802	2.9417	4.8824	Thermus thermophilus HB8	TTHA0663
TT5orF0208_at	0.0021048	3.63e-05	10.2568	2.92708	1.64701	Thermus thermophilus HB8	TTHA0208
TT5orR0632_at	0.0021048	3.77e-05	10.1927	2.88695	1.91088	Thermus thermophilus HB8	TTHA0632
TT5orR1680_at	0.0021048	3.77e-05	-10.1895	2.88499	-1.93539	Thermus thermophilus HB8	TTHA1680
TT5orR1626_at	0.0021048	3.8e-05	10.179	2.87834	2.61598	Thermus thermophilus HB8	TTHA1626
TT5igR7073_at	0.0021112	3.89e-05	-10.1401	2.85389	-2.1426	Thermus thermophilus HB8
TT5orR0141_at	0.0021112	3.99e-05	10.0949	2.82524	2.49248	Thermus thermophilus HB8	TTHA0141
TT5orR1396_at	0.0021112	3.99e-05	-10.0941	2.82474	-1.4309	Thermus thermophilus HB8	TTHA1396
TT5orF1639_at	0.0021112	4.05e-05	-10.0697	2.80925	-1.46486	Thermus thermophilus HB8	TTHA1639
TT5igR0544_at	0.0021575	4.25e-05	9.9884	2.75737	1.94909	Thermus thermophilus HB8
TT5orR1482_at	0.0021575	4.36e-05	9.94466	2.72926	1.45085	Thermus thermophilus HB8	TTHA1482
TT5orR1872_at	0.0021575	4.39e-05	9.93667	2.72412	1.50536	Thermus thermophilus HB8	TTHA1872
TT5orR0246_at	0.0021575	4.39e-05	-9.93637	2.72393	-1.77608	Thermus thermophilus HB8	TTHA0246
TT5orF0092_at	0.0022118	4.56e-05	9.87201	2.68232	1.50161	Thermus thermophilus HB8	TTHA0092
TT5orF0614_at	0.0022837	4.85e-05	-9.77137	2.61671	-1.62482	Thermus thermophilus HB8	TTHA0614
TT5orR1400_at	0.0022837	4.9e-05	9.75493	2.60593	1.64437	Thermus thermophilus HB8	TTHA1400
TT5igR0642_at	0.0022837	4.9e-05	9.75229	2.60419	2.30357	Thermus thermophilus HB8
TT5orR1214_at	0.0023256	5.11e-05	9.68499	2.55985	1.52975	Thermus thermophilus HB8	TTHA1214
TT5orF4179_at	0.0023256	5.13e-05	-9.6797	2.55635	-2.6798	Thermus thermophilus HB8	TTHB179
TT5orF1317_at	0.0023617	5.28e-05	9.63383	2.52594	1.60712	Thermus thermophilus HB8	TTHA1317
TT5orF4186_at	0.0025885	5.94e-05	9.44468	2.39899	3.37687	Thermus thermophilus HB8	TTHB186
TT5orF1841_at	0.0025885	5.97e-05	-9.43607	2.39315	-2.4187	Thermus thermophilus HB8	TTHA1841
TT5orR1401_at	0.0025885	6e-05	9.42647	2.38664	1.33342	Thermus thermophilus HB8	TTHA1401
TT5orR1403_at	0.0028376	6.66e-05	9.26242	2.27428	1.61221	Thermus thermophilus HB8	TTHA1403
TT5orR0612_at	0.0028386	6.76e-05	-9.23905	2.25811	-1.53814	Thermus thermophilus HB8	TTHA0612
TT5orF0097_at	0.0028386	6.83e-05	9.22432	2.2479	1.50863	Thermus thermophilus HB8	TTHA0097
TT5orF0207_at	0.0028474	6.94e-05	9.19987	2.23092	1.596	Thermus thermophilus HB8	TTHA0207
TT5orF0095_at	0.0028474	7.01e-05	9.18297	2.21916	1.4919	Thermus thermophilus HB8	TTHA0095
TT5orR1476_at	0.0029239	7.28e-05	9.12407	2.17799	1.69062	Thermus thermophilus HB8	TTHA1476
TT5orR1485_at	0.0029261	7.41e-05	9.09861	2.16013	1.32377	Thermus thermophilus HB8	TTHA1485
TT5orR1073_at	0.0029261	7.5e-05	-9.07979	2.14688	-1.66881	Thermus thermophilus HB8	TTHA1073
TT5orF0473_at	0.0029261	7.57e-05	-9.0657	2.13695	-1.32117	Thermus thermophilus HB8	TTHA0473
TT5igF4091_at	0.0029261	7.68e-05	9.04289	2.12084	1.48533	Thermus thermophilus HB8
TT5orR0859_at	0.0029261	7.71e-05	-9.0371	2.11675	-1.20007	Thermus thermophilus HB8	TTHA0859
TT5orF1597_at	0.0029311	7.81e-05	9.01797	2.1032	1.25558	Thermus thermophilus HB8	TTHA1597
TT5orF0798_at	0.0029422	7.92e-05	8.99594	2.08756	1.39869	Thermus thermophilus HB8	TTHA0798
TT5orF0096_at	0.0033446	9.14e-05	8.77945	1.93191	1.67868	Thermus thermophilus HB8	TTHA0096
TT5orR1406_at	0.0033446	9.19e-05	8.77111	1.92584	1.34176	Thermus thermophilus HB8	TTHA1406
TT5orF0829_at	0.0034088	9.52e-05	8.71975	1.88835	2.49375	Thermus thermophilus HB8	TTHA0829
TT5orR1506_at	0.0034088	9.57e-05	8.71223	1.88284	1.26745	Thermus thermophilus HB8	TTHA1506
TT5orR1677_at	0.0034371	9.74e-05	-8.68502	1.86287	-2.5123	Thermus thermophilus HB8	TTHA1677
TT5igR0680_at	0.0034648	9.92e-05	-8.65833	1.84323	-2.14561	Thermus thermophilus HB8
TT5orF0091_at	0.0036188	0.000105	8.5799	1.78518	1.48958	Thermus thermophilus HB8	TTHA0091
TT5orR0726_at	0.0036494	0.000109	8.52733	1.74599	1.53639	Thermus thermophilus HB8	TTHA0726
TT5orR1625_at	0.0036494	0.000109	8.51885	1.73964	1.2059	Thermus thermophilus HB8	TTHA1625
TT5orF1326_at	0.0036494	0.00011	-8.50311	1.72786	-2.25123	Thermus thermophilus HB8	TTHA1326
TT5igR0576_at	0.0036494	0.000111	8.49767	1.72378	1.41867	Thermus thermophilus HB8
TT5orR1163_at	0.0036494	0.000111	8.49731	1.72351	1.44973	Thermus thermophilus HB8	TTHA1163
TT5orR1681_at	0.0037383	0.000116	-8.43565	1.6771	-1.76995	Thermus thermophilus HB8	TTHA1681
TT5orF4118_at	0.0037383	0.000117	8.42267	1.66729	1.44977	Thermus thermophilus HB8	TTHB118
TT5orF0953_at	0.0037383	0.000117	8.42226	1.66698	1.73926	Thermus thermophilus HB8	TTHA0953
TT5orR1487_at	0.0038981	0.000123	8.3492	1.61149	1.44014	Thermus thermophilus HB8	TTHA1487
TT5orR1479_at	0.0039403	0.000125	8.32093	1.5899	1.21607	Thermus thermophilus HB8	TTHA1479
TT5orR1621_at	0.0040718	0.000131	8.25387	1.53843	1.30599	Thermus thermophilus HB8	TTHA1621
TT5orF0674_at	0.0040718	0.000132	8.24903	1.5347	2.06806	Thermus thermophilus HB8	TTHA0674
TT5orR1682_at	0.0042724	0.000139	-8.16894	1.47266	-1.87577	Thermus thermophilus HB8	TTHA1682
TT5orF4191_at	0.0043433	0.000143	8.13372	1.44521	1.47983	Thermus thermophilus HB8	TTHB191
AFFX-ThrX-M_at	0.0043808	0.000146	8.10966	1.42639	1.19699	B. subtilis	NA
TT5orR0627_at	0.004383	0.000147	-8.09686	1.41636	-1.89163	Thermus thermophilus HB8	TTHA0627
TT5orF0552_at	0.004383	0.000148	-8.08517	1.40719	-1.09673	Thermus thermophilus HB8	TTHA0552
TT5orF1247_at	0.0045457	0.000157	8.00354	1.34279	1.43162	Thermus thermophilus HB8	TTHA1247
TT5orR1475_at	0.0045457	0.000158	7.99239	1.33394	1.28415	Thermus thermophilus HB8	TTHA1475
TT5igF0101_at	0.0045457	0.000158	7.99237	1.33392	1.08929	Thermus thermophilus HB8
TT5orR7063_at	0.0045457	0.000159	-7.98869	1.33101	-4.45466	Thermus thermophilus HB8	TTHY7063
TT5orF0089_at	0.0046807	0.000166	7.92572	1.28084	1.24857	Thermus thermophilus HB8	TTHA0089
TT5orF1946_at	0.0046807	0.000167	-7.91775	1.27446	-1.07623	Thermus thermophilus HB8	TTHA1946
TT5orF4192_at	0.0046807	0.000169	7.90655	1.26549	1.66922	Thermus thermophilus HB8	TTHB192
TT5orR1278_at	0.0046807	0.000169	-7.90446	1.26382	-1.01296	Thermus thermophilus HB8	TTHA1278
TT5orR1478_at	0.0046995	0.000171	7.8865	1.24941	1.30945	Thermus thermophilus HB8	TTHA1478
TT5orF1973_at	0.0046995	0.000173	-7.8688	1.23517	-1.21645	Thermus thermophilus HB8	TTHA1973
TT5orR1576_at	0.0046995	0.000175	-7.85658	1.22533	-1.11836	Thermus thermophilus HB8	TTHA1576
TT5igR0754_at	0.0046995	0.000175	7.85653	1.22529	2.28974	Thermus thermophilus HB8
TT5orF1637_at	0.0047413	0.000178	-7.83414	1.20722	-1.22202	Thermus thermophilus HB8	TTHA1637
TT5orF1220_at	0.0048015	0.000184	7.79159	1.17276	1.68048	Thermus thermophilus HB8	TTHA1220
TT5orR1484_at	0.0048015	0.000186	7.77182	1.15669	1.1684	Thermus thermophilus HB8	TTHA1484
TT5orR1514_at	0.0048015	0.000187	7.76597	1.15192	1.45947	Thermus thermophilus HB8	TTHA1514
TT5orR1685_at	0.0048015	0.000187	-7.76438	1.15063	-2.02961	Thermus thermophilus HB8	TTHA1685
TT5orR0630_at	0.0048015	0.000188	-7.76225	1.1489	-1.14063	Thermus thermophilus HB8	TTHA0630
TT5orF4189_at	0.0048015	0.000188	7.7568	1.14445	1.51398	Thermus thermophilus HB8	TTHB189
TT5orF1378_at	0.0048797	0.000194	-7.71776	1.11256	-1.36003	Thermus thermophilus HB8	TTHA1378
TT5orR0518_at	0.0048797	0.000194	7.71577	1.11093	1.08863	Thermus thermophilus HB8	TTHA0518
AFFX-ThrX-5_at	0.0048807	0.000196	7.70591	1.10285	1.15417	B. subtilis	NA
TT5orR1072_at	0.0048842	0.000197	-7.69549	1.09429	-1.53963	Thermus thermophilus HB8	TTHA1072
TT5orF0159_at	0.0049112	0.0002	7.67872	1.08052	1.3604	Thermus thermophilus HB8	TTHA0159
TT5orR1690_at	0.0050118	0.000205	-7.64247	1.05064	-1.88615	Thermus thermophilus HB8	TTHA1690
TT5orR1675_at	0.0052592	0.000217	-7.56966	0.99024	-1.77586	Thermus thermophilus HB8	TTHA1675
TT5orR4222_at	0.005301	0.000222	-7.54035	0.96579	-1.86139	Thermus thermophilus HB8	TTHB222
TT5igF0248_at	0.005301	0.000223	-7.53112	0.95807	-1.95183	Thermus thermophilus HB8
TT5orF0206_at	0.005301	0.000224	7.52967	0.95685	1.51619	Thermus thermophilus HB8	TTHA0206
TT5orR1175_at	0.005301	0.000225	-7.52337	0.95158	-1.00958	Thermus thermophilus HB8	TTHA1175
TT5orF0209_at	0.0053259	0.000231	-7.48692	0.92099	-1.67255	Thermus thermophilus HB8	TTHA0209
TT5orR0860_at	0.0053259	0.000231	-7.48589	0.92013	-1.17203	Thermus thermophilus HB8	TTHA0860
TT5orR1570_at	0.0053259	0.000232	-7.48306	0.91774	-1.21613	Thermus thermophilus HB8	TTHA1570
TT5orR0370_at	0.0053259	0.000232	-7.48243	0.91722	-1.12472	Thermus thermophilus HB8	TTHA0370
TT5orF0524_at	0.0054314	0.000239	-7.44428	0.88504	-1.41027	Thermus thermophilus HB8	TTHA0524
TT5orR0561_at	0.0054314	0.00024	-7.43996	0.88139	-0.931945	Thermus thermophilus HB8	TTHA0561
TT5orR1669_at	0.0055858	0.000248	-7.39535	0.84357	-1.18078	Thermus thermophilus HB8	TTHA1669
TT5orF1325_at	0.0056369	0.000252	-7.37533	0.82653	-2.16979	Thermus thermophilus HB8	TTHA1325
TT5orR0836_at	0.0056537	0.000254	-7.36328	0.81625	-1.8618	Thermus thermophilus HB8	TTHA0836
AFFX-PheX-M_at	0.0057613	0.000263	7.32006	0.77928	1.27936	B. subtilis	NA
TT5igR4014_at	0.0057613	0.000263	7.31832	0.77778	1.3199	Thermus thermophilus HB8
TT5orR1483_at	0.0057613	0.000265	7.31154	0.77197	1.24249	Thermus thermophilus HB8	TTHA1483
TT5orF0090_at	0.0057613	0.000266	7.30689	0.76797	1.24805	Thermus thermophilus HB8	TTHA0090
TT5igR7007_at	0.0058222	0.000271	-7.2825	0.747	-2.5986	Thermus thermophilus HB8
TT5orR1683_at	0.0058222	0.000272	-7.27511	0.74063	-1.83986	Thermus thermophilus HB8	TTHA1683
TT5igF0621_at	0.0058222	0.000273	-7.26996	0.73619	-2.34315	Thermus thermophilus HB8
TT5orF4119_at	0.0058467	0.000276	7.25689	0.7249	1.42947	Thermus thermophilus HB8	TTHB119
TT5orR0162_at	0.0059027	0.000281	-7.23713	0.70781	-0.962379	Thermus thermophilus HB8	TTHA0162
TT5orR0223_at	0.0060568	0.00029	7.19695	0.67293	1.32405	Thermus thermophilus HB8	TTHA0223
TT5orR0845_at	0.0061165	0.000294	7.17707	0.65561	1.40486	Thermus thermophilus HB8	TTHA0845
TT5orR1664_at	0.0061454	0.000299	-7.15688	0.63798	-1.11629	Thermus thermophilus HB8	TTHA1664
TT5orF0906_at	0.0061454	0.000299	7.15626	0.63744	1.06849	Thermus thermophilus HB8	TTHA0906
TT5orR1279_at	0.0061821	0.000303	-7.13842	0.62182	-1.09094	Thermus thermophilus HB8	TTHA1279
TT5igR4010_at	0.0061821	0.000305	-7.13411	0.61805	-4.83664	Thermus thermophilus HB8
TT5orR0761_at	0.0062021	0.000309	7.1139	0.60031	1.02438	Thermus thermophilus HB8	TTHA0761
TT5orR0996_at	0.0062021	0.000312	7.10506	0.59253	1.25048	Thermus thermophilus HB8	TTHA0996
TT5orR1094_at	0.0062021	0.000314	-7.09604	0.58459	-1.09011	Thermus thermophilus HB8	TTHA1094
TT5orR1486_at	0.0062021	0.000316	7.08762	0.57717	1.12209	Thermus thermophilus HB8	TTHA1486
TT5orF4207_at	0.0062021	0.000317	-7.0856	0.5754	-1.49815	Thermus thermophilus HB8	TTHB207
TT5orR1397_at	0.0062021	0.000318	-7.08089	0.57124	-0.991376	Thermus thermophilus HB8	TTHA1397
TT5orF0002_at	0.0062021	0.000318	-7.08027	0.57069	-1.24799	Thermus thermophilus HB8	TTHA0002
TT5orF0472_at	0.0063482	0.000327	-7.04442	0.53899	-1.76911	Thermus thermophilus HB8	TTHA0472
TT5orF0094_at	0.0063934	0.000331	7.02876	0.52511	1.0429	Thermus thermophilus HB8	TTHA0094
TT5orR0824_at	0.0064262	0.000337	-7.00712	0.50587	-1.19997	Thermus thermophilus HB8	TTHA0824
TT5igR4021_at	0.0064262	0.000337	7.0065	0.50532	1.60886	Thermus thermophilus HB8
TT5orF1641_at	0.0064262	0.000342	6.98849	0.48927	1.22262	Thermus thermophilus HB8	TTHA1641
TT5orR0103_at	0.0064262	0.000343	6.98787	0.48872	1.01191	Thermus thermophilus HB8	TTHA0103
TT5orR0825_at	0.0064262	0.000343	-6.98488	0.48605	-1.19439	Thermus thermophilus HB8	TTHA0825
TT5orF0087_at	0.0064262	0.000344	6.9822	0.48365	1.25453	Thermus thermophilus HB8	TTHA0087
TT5orR1684_at	0.0064685	0.000348	-6.96756	0.47058	-1.85303	Thermus thermophilus HB8	TTHA1684
TT5orR1408_at	0.0066217	0.000359	6.92977	0.43671	1.4306	Thermus thermophilus HB8	TTHA1408
TT5orF0126_at	0.0066217	0.00036	6.92588	0.43321	0.89619	Thermus thermophilus HB8	TTHA0126
TT5orF4190_at	0.0066224	0.000363	6.91836	0.42645	1.67069	Thermus thermophilus HB8	TTHB190
TT5igR0716_at	0.0066224	0.000364	-6.91296	0.42159	-1.13282	Thermus thermophilus HB8
TT5orF0713_at	0.0066292	0.000366	6.90517	0.41457	1.62337	Thermus thermophilus HB8	TTHA0713
TT5orF0270_at	0.0066292	0.00037	-6.89462	0.40506	-0.921396	Thermus thermophilus HB8	TTHA0270
TT5orR1667_at	0.0066292	0.000372	-6.88625	0.39751	-1.26413	Thermus thermophilus HB8	TTHA1667
TT5orR1697_at	0.0066292	0.000373	-6.88435	0.39579	-1.43732	Thermus thermophilus HB8	TTHA1697
TT5orR1489_at	0.0066292	0.000374	6.88036	0.39219	0.99517	Thermus thermophilus HB8	TTHA1489
TT5orF0135_at	0.0068233	0.000388	-6.83705	0.35295	-1.36902	Thermus thermophilus HB8	TTHA0135
TT5orR1065_at	0.0068233	0.000389	-6.83182	0.34819	-1.52822	Thermus thermophilus HB8	TTHA1065
TT5igR0030_at	0.0068233	0.000391	6.82701	0.34383	1.18893	Thermus thermophilus HB8
TT5orF0607_at	0.0068433	0.000395	6.81363	0.33164	1.32794	Thermus thermophilus HB8	TTHA0607
TT5orR1666_at	0.0068433	0.000396	-6.81146	0.32967	-1.07561	Thermus thermophilus HB8	TTHA1666
TT5igR0263_at	0.0068444	0.000398	6.80384	0.32272	1.50568	Thermus thermophilus HB8
TT5orF0458_at	0.0068444	0.000401	-6.79698	0.31646	-1.14221	Thermus thermophilus HB8	TTHA0458
TT5orF4193_at	0.0068444	0.000402	6.79331	0.31311	1.44599	Thermus thermophilus HB8	TTHB193
TT5orF0093_at	0.0068444	0.000404	6.78763	0.30792	1.62591	Thermus thermophilus HB8	TTHA0093
TT5orR1676_at	0.0068738	0.000407	-6.77664	0.29787	-1.83684	Thermus thermophilus HB8	TTHA1676
TT5orR1686_at	0.006973	0.000415	-6.75365	0.2768	-1.67536	Thermus thermophilus HB8	TTHA1686
TT5igF0619_at	0.0070023	0.000419	6.74288	0.26691	7.47672	Thermus thermophilus HB8
TT5orF0352_at	0.0070947	0.000428	-6.71886	0.24481	-1.14409	Thermus thermophilus HB8	TTHA0352
TT5igF4082_at	0.0070947	0.000429	6.71582	0.24201	1.74154	Thermus thermophilus HB8
TT5igF0352_at	0.0071034	0.000431	6.70873	0.23547	1.04492	Thermus thermophilus HB8
TT5orR4027_at	0.0071063	0.000433	6.70262	0.22983	1.00774	Thermus thermophilus HB8	TTHB027
TT5orR1691_at	0.0071541	0.000438	-6.68901	0.21725	-1.7086	Thermus thermophilus HB8	TTHA1691
TT5orR0802_at	0.0071541	0.000442	-6.67966	0.20861	-0.982192	Thermus thermophilus HB8	TTHA0802
TT5orR0862_at	0.0071541	0.000443	6.67799	0.20706	1.1594	Thermus thermophilus HB8	TTHA0862
TT5orR1464_at	0.007207	0.000448	-6.66376	0.19387	-1.32354	Thermus thermophilus HB8	TTHA1464
TT5orR1543_at	0.0072311	0.000452	6.65279	0.18368	0.957531	Thermus thermophilus HB8	TTHA1543
TT5orR1589_at	0.0072311	0.000454	-6.64755	0.17882	-1.06664	Thermus thermophilus HB8	TTHA1589
TT5orR1561_at	0.0072311	0.000456	-6.64354	0.17509	-0.900809	Thermus thermophilus HB8	TTHA1561
TT5orF0048_at	0.0072759	0.000461	6.62833	0.16093	1.18871	Thermus thermophilus HB8	TTHA0048
TT5orF1495_at	0.0072759	0.000463	6.62552	0.15831	1.08677	Thermus thermophilus HB8	TTHA1495
TT5orF1440_at	0.0073041	0.000466	-6.61566	0.14911	-0.913272	Thermus thermophilus HB8	TTHA1440
TT5orR1665_at	0.007314	0.00047	-6.60734	0.14135	-1.13291	Thermus thermophilus HB8	TTHA1665
TT5orF4150_at	0.007314	0.000473	6.60019	0.13466	1.29269	Thermus thermophilus HB8	TTHB150
TT5orR1352_at	0.007314	0.000473	6.59832	0.13291	1.38045	Thermus thermophilus HB8	TTHA1352
TT5orF4187_at	0.0075796	0.000493	6.55052	0.08809	2.03637	Thermus thermophilus HB8	TTHB187
TT5orR0727_at	0.0075796	0.000496	6.54334	0.08133	2.06493	Thermus thermophilus HB8	TTHA0727
TT5igF0556_at	0.0075796	0.000499	6.53643	0.07483	1.91633	Thermus thermophilus HB8
TT5orR0738_at	0.0075796	0.0005	6.53344	0.072	0.930791	Thermus thermophilus HB8	TTHA0738
TT5orR4173_at	0.0075796	0.000503	6.52612	0.0651	1.11869	Thermus thermophilus HB8	TTHB173
TT5orF1005_at	0.0075796	0.000506	-6.5195	0.05886	-0.956363	Thermus thermophilus HB8	TTHA1005
TT5orR0844_at	0.0075796	0.000509	6.51433	0.05397	1.13705	Thermus thermophilus HB8	TTHA0844
TT5orR1562_at	0.0075796	0.000509	-6.51413	0.05378	-1.16507	Thermus thermophilus HB8	TTHA1562
TT5orF1068_at	0.0075796	0.00051	-6.51079	0.05063	-0.907188	Thermus thermophilus HB8	TTHA1068
TT5orR0861_at	0.0075897	0.000513	-6.5043	0.04449	-0.937529	Thermus thermophilus HB8	TTHA0861
TT5orF0554_at	0.0076056	0.000516	-6.49694	0.03752	-1.05445	Thermus thermophilus HB8	TTHA0554
TT5orR1845_at	0.0076177	0.000521	6.48601	0.02717	1.98861	Thermus thermophilus HB8	TTHA1845
TT5orR0169_at	0.0076177	0.000523	6.4808	0.02223	1.12115	Thermus thermophilus HB8	TTHA0169
TT5orR1642_at	0.0076177	0.000524	-6.48047	0.02192	-0.932514	Thermus thermophilus HB8	TTHA1642
TT5orR1869_at	0.0076276	0.000526	6.47413	0.0159	1.12763	Thermus thermophilus HB8	TTHA1869
TT5orR1491_at	0.0076606	0.000531	6.46433	0.00659	1.33	Thermus thermophilus HB8	TTHA1491
TT5orF4212_at	0.0077549	0.00054	6.4454	-0.01143	1.10902	Thermus thermophilus HB8	TTHB212
TT5orR0248_at	0.0078612	0.00055	-6.42336	-0.03246	-1.13644	Thermus thermophilus HB8	TTHA0248
TT5orF0230_at	0.0078612	0.000552	6.42023	-0.03545	0.966012	Thermus thermophilus HB8	TTHA0230
TT5orR1588_at	0.0078645	0.000554	-6.41504	-0.0404	-1.29747	Thermus thermophilus HB8	TTHA1588
TT5orR0171_at	0.0078816	0.000557	6.40787	-0.04727	0.913902	Thermus thermophilus HB8	TTHA0171
TT5orF1134_at	0.0078928	0.000562	6.39786	-0.05685	2.94391	Thermus thermophilus HB8	TTHA1134
TT5orR1668_at	0.0078928	0.00057	-6.38321	-0.07091	-1.14761	Thermus thermophilus HB8	TTHA1668
TT5igF0189_at	0.0078928	0.00057	-6.38195	-0.07212	-1.29951	Thermus thermophilus HB8
TT5orF0679_at	0.0078928	0.000573	6.37692	-0.07695	1.97975	Thermus thermophilus HB8	TTHA0679
TT5orR0303_at	0.0078928	0.000574	6.37516	-0.07864	1.04934	Thermus thermophilus HB8	TTHA0303
TT5orF0994_at	0.0078928	0.000574	-6.37492	-0.07887	-1.22729	Thermus thermophilus HB8	TTHA0994
TT5orR1020_at	0.0078928	0.000576	6.37079	-0.08284	0.976015	Thermus thermophilus HB8	TTHA1020
TT5orR1688_at	0.0078928	0.000576	-6.36963	-0.08395	-1.73714	Thermus thermophilus HB8	TTHA1688
TT5orR0827_at	0.0080166	0.000588	-6.34735	-0.10541	-1.2066	Thermus thermophilus HB8	TTHA0827
TT5orF1010_at	0.0080292	0.000592	6.33888	-0.11359	0.97586	Thermus thermophilus HB8	TTHA1010
TT5orR1480_at	0.0080292	0.000595	6.33298	-0.11928	1.4644	Thermus thermophilus HB8	TTHA1480
TT5igR0525_at	0.0080292	0.000603	-6.31807	-0.1337	-1.47744	Thermus thermophilus HB8
TT5orF1604_at	0.0080292	0.000605	-6.31424	-0.13741	-1.10514	Thermus thermophilus HB8	TTHA1604
TT5orF1379_at	0.0080292	0.000606	6.31261	-0.13899	1.08715	Thermus thermophilus HB8	TTHA1379
TT5igR0102_at	0.0080292	0.000606	-6.31171	-0.13986	-1.59929	Thermus thermophilus HB8
TT5orR1930_at	0.0080292	0.000608	6.30771	-0.14373	1.11491	Thermus thermophilus HB8	TTHA1930
TT5orR0411_at	0.0080292	0.000609	6.30619	-0.14521	0.973374	Thermus thermophilus HB8	TTHA0411
TT5orR0061_at	0.0080292	0.00061	6.30499	-0.14637	1.1018	Thermus thermophilus HB8	TTHA0061
AFFX-r2-Bs-thr-M_s_at	0.0080292	0.000612	6.3019	-0.14937	1.10415	B. subtilis	NA
TT5igF0511_at	0.0080433	0.000615	6.29564	-0.15544	1.33145	Thermus thermophilus HB8
TT5igF0663_at	0.0080443	0.00062	6.28578	-0.16502	1.58559	Thermus thermophilus HB8
TT5orF0462_at	0.0080443	0.000621	6.28521	-0.16557	1.08595	Thermus thermophilus HB8	TTHA0462
TT5orR0144_at	0.0080443	0.000623	6.28067	-0.16998	1.08202	Thermus thermophilus HB8	TTHA0144
TT5orR1035_at	0.0080443	0.000624	-6.27841	-0.17218	-1.27567	Thermus thermophilus HB8	TTHA1035
TT5orR4171_at	0.0080443	0.00063	6.26776	-0.18255	0.963517	Thermus thermophilus HB8	TTHB171
TT5orF1701_at	0.0080443	0.000632	6.26528	-0.18497	1.27436	Thermus thermophilus HB8	TTHA1701
TT5orF1004_at	0.0080443	0.000632	-6.26393	-0.18628	-1.33054	Thermus thermophilus HB8	TTHA1004
TT5orR0250_at	0.0080443	0.000635	-6.25849	-0.19158	-1.13946	Thermus thermophilus HB8	TTHA0250
TT5orR1695_at	0.0080443	0.000636	-6.25794	-0.19212	-1.32871	Thermus thermophilus HB8	TTHA1695
TT5igR0481_at	0.0082148	0.000653	6.22766	-0.2217	4.65237	Thermus thermophilus HB8
TT5igR0618_at	0.0082148	0.000654	-6.22613	-0.2232	-1.64886	Thermus thermophilus HB8
TT5orF1376_at	0.0082798	0.000662	6.21322	-0.23584	1.20346	Thermus thermophilus HB8	TTHA1376
TT5orR0899_at	0.008375	0.000672	-6.19571	-0.25303	-0.833463	Thermus thermophilus HB8	TTHA0899
TT5igR0664_at	0.008375	0.000676	-6.18953	-0.2591	-1.22522	Thermus thermophilus HB8
TT5orF1619_at	0.008375	0.000678	-6.18629	-0.26229	-1.1996	Thermus thermophilus HB8	TTHA1619
TT5igR0038_at	0.008375	0.000683	-6.17696	-0.27148	-4.43307	Thermus thermophilus HB8
TT5orR0771_at	0.008375	0.000687	6.17074	-0.27761	1.75515	Thermus thermophilus HB8	TTHA0771
TT5orR0324_at	0.008375	0.000688	6.16881	-0.27951	0.86695	Thermus thermophilus HB8	TTHA0324
TT5orF0677_at	0.008375	0.00069	6.16671	-0.28158	2.87853	Thermus thermophilus HB8	TTHA0677
TT5orR4177_at	0.008375	0.00069	-6.16604	-0.28224	-1.04439	Thermus thermophilus HB8	TTHB177
TT5orF0383_at	0.008375	0.000692	-6.16234	-0.28589	-0.804404	Thermus thermophilus HB8	TTHA0383
TT5igF0423_at	0.008375	0.000696	-6.15667	-0.29149	-1.91216	Thermus thermophilus HB8
TT5orF1367_at	0.008375	0.000697	6.15393	-0.29419	1.23881	Thermus thermophilus HB8	TTHA1367
TT5orF0457_at	0.008375	0.000698	-6.15324	-0.29487	-0.936542	Thermus thermophilus HB8	TTHA0457
TT5orF0262_at	0.008379	0.000701	-6.14755	-0.30049	-0.959965	Thermus thermophilus HB8	TTHA0262
TT5orR1577_at	0.008379	0.000703	-6.14484	-0.30318	-1.02532	Thermus thermophilus HB8	TTHA1577
AFFX-r2-Bs-thr-3_s_at	0.008379	0.000705	6.14127	-0.30671	1.39131	B. subtilis	NA
TT5igF0223_at	0.0084209	0.000713	-6.12938	-0.31848	-1.3097	Thermus thermophilus HB8
TT5orF0559_at	0.0084209	0.000714	6.12817	-0.31968	0.934541	Thermus thermophilus HB8	TTHA0559
AFFX-DapX-M_at	0.0085532	0.000727	6.10709	-0.34059	1.1206	B. subtilis	NA
TT5orF4180_at	0.0085784	0.000732	-6.10011	-0.34753	-1.2878	Thermus thermophilus HB8	TTHB180
TT5orF0678_at	0.0086216	0.000742	6.08503	-0.36254	2.41002	Thermus thermophilus HB8	TTHA0678
TT5orR1064_at	0.0086216	0.000744	6.08149	-0.36607	1.04188	Thermus thermophilus HB8	TTHA1064
TT5orR0152_at	0.0086216	0.000746	6.07928	-0.36827	0.889555	Thermus thermophilus HB8	TTHA0152
TT5orF0831_at	0.0086216	0.000748	6.07649	-0.37105	0.934715	Thermus thermophilus HB8	TTHA0831
TT5igF0667_at	0.0086216	0.000748	6.07613	-0.37142	0.910385	Thermus thermophilus HB8
TT5orR0243_at	0.0087252	0.000767	-6.04917	-0.39835	-1.02533	Thermus thermophilus HB8	TTHA0243
TT5orR1689_at	0.0087252	0.000768	-6.04663	-0.40089	-1.69222	Thermus thermophilus HB8	TTHA1689
TT5orF0255_at	0.0087252	0.000769	-6.04619	-0.40133	-1.36954	Thermus thermophilus HB8	TTHA0255
TT5orF0003_at	0.0087252	0.00077	-6.04395	-0.40357	-0.922654	Thermus thermophilus HB8	TTHA0003
TT5orF0084_at	0.0087252	0.000772	6.04168	-0.40585	1.08254	Thermus thermophilus HB8	TTHA0084
TT5orR1031_at	0.0087252	0.000774	-6.03899	-0.40854	-1.06776	Thermus thermophilus HB8	TTHA1031
TT5orR0245_at	0.0087252	0.000775	-6.03776	-0.40978	-0.846639	Thermus thermophilus HB8	TTHA0245
TT5orF0210_at	0.0087402	0.000778	-6.03223	-0.41532	-1.32584	Thermus thermophilus HB8	TTHA0210
TT5orR1481_at	0.0087402	0.000781	6.0288	-0.41876	1.10158	Thermus thermophilus HB8	TTHA1481
TT5orF1104_at	0.0088098	0.00079	6.01657	-0.43104	0.810828	Thermus thermophilus HB8	TTHA1104
TT5orF1361_at	0.0088205	0.000794	6.01096	-0.43668	0.82429	Thermus thermophilus HB8	TTHA1361
TT5igF4059_at	0.0088205	0.000797	6.00681	-0.44085	0.926017	Thermus thermophilus HB8
TT5orR0868_at	0.0088205	0.000798	6.00478	-0.4429	1.15523	Thermus thermophilus HB8	TTHA0868
TT5igR0731_at	0.0090006	0.000817	-5.9792	-0.46868	-1.17174	Thermus thermophilus HB8
TT5igR0243_at	0.0090366	0.000824	-5.97038	-0.47759	-2.25345	Thermus thermophilus HB8
TT5orR4185_at	0.0090366	0.000826	5.96798	-0.48002	1.08035	Thermus thermophilus HB8	TTHB185
TT5igF0070_at	0.0091763	0.000842	5.9458	-0.50247	2.00805	Thermus thermophilus HB8	NA
TT5orR0249_at	0.0091763	0.000844	-5.94445	-0.50383	-0.997345	Thermus thermophilus HB8	TTHA0249
TT5orF4188_at	0.0091881	0.000848	5.93916	-0.5092	1.21468	Thermus thermophilus HB8	TTHB188
TT5orF4152_at	0.0091881	0.00085	5.93631	-0.51209	1.29414	Thermus thermophilus HB8	TTHB152
TT5orR0927_at	0.0093405	0.000872	5.90851	-0.54036	0.80628	Thermus thermophilus HB8	TTHA0927
TT5igF0095_at	0.0093405	0.000873	5.90733	-0.54156	1.4778	Thermus thermophilus HB8
TT5orR0044_at	0.0093405	0.000873	-5.90658	-0.54232	-0.937548	Thermus thermophilus HB8	TTHA0044
TT5orF0628_at	0.0093405	0.000875	5.90512	-0.54381	1.02105	Thermus thermophilus HB8	TTHA0628
TT5orR0153_at	0.0093736	0.00088	5.89799	-0.55108	0.936155	Thermus thermophilus HB8	TTHA0153
TT5orR4037_at	0.0094306	0.000889	5.88713	-0.56216	1.04535	Thermus thermophilus HB8	TTHB037
TT5orR1692_at	0.0094306	0.000891	-5.88487	-0.56447	-1.46768	Thermus thermophilus HB8	TTHA1692
TT5orF0625_at	0.0095117	0.000906	5.86718	-0.58256	1.07912	Thermus thermophilus HB8	TTHA0625
TT5orF1502_at	0.0095117	0.000907	5.86638	-0.58338	1.08732	Thermus thermophilus HB8	TTHA1502
TT5orF0470_at	0.0095117	0.000907	-5.86588	-0.5839	-1.06143	Thermus thermophilus HB8	TTHA0470
TT5igR7050_at	0.0098983	0.000947	-5.81986	-0.63115	-1.64864	Thermus thermophilus HB8
TT5orF1339_at	0.0099045	0.00095	5.81599	-0.63514	1.22139	Thermus thermophilus HB8	TTHA1339
TT5orR0977_at	0.0101279	0.000975	5.78897	-0.66303	0.952272	Thermus thermophilus HB8	TTHA0977
TT5orR1505_at	0.0101332	0.000978	5.78524	-0.66689	0.985226	Thermus thermophilus HB8	TTHA1505
TT5orR1649_at	0.0101711	0.000987	5.77565	-0.67681	1.11713	Thermus thermophilus HB8	TTHA1649
TT5orR1696_at	0.0101711	0.000987	-5.77495	-0.67754	-1.15748	Thermus thermophilus HB8	TTHA1696
TT5orR1593_at	0.0102045	0.000994	5.76776	-0.68499	1.11811	Thermus thermophilus HB8	TTHA1593
TT5orF1377_at	0.0102045	0.000996	5.76521	-0.68763	1.19256	Thermus thermophilus HB8	TTHA1377
TT5igR4033_at	0.0103079	0.00101	5.74963	-0.7038	1.3055	Thermus thermophilus HB8
TT5igF0627_at	0.0103079	0.00101	5.74828	-0.70521	1.00488	Thermus thermophilus HB8
TT5orF0001_at	0.0103421	0.00102	-5.74168	-0.71207	-0.964228	Thermus thermophilus HB8	TTHA0001
TT5orR1298_at	0.0103705	0.00102	-5.73568	-0.71831	-0.915385	Thermus thermophilus HB8	TTHA1298
TT5orR0542_at	0.0104988	0.00105	5.71454	-0.74034	0.876408	Thermus thermophilus HB8	TTHA0542
TT5orR1788_at	0.0104988	0.00105	5.71147	-0.74355	0.783353	Thermus thermophilus HB8	TTHA1788
TT5igR0407_at	0.0104988	0.00105	-5.70968	-0.74542	-1.14264	Thermus thermophilus HB8
AFFX-DapX-5_at	0.0104988	0.00105	5.70956	-0.74554	1.21013	B. subtilis	NA
TT5orF0232_at	0.0104988	0.00105	5.70614	-0.74912	0.853327	Thermus thermophilus HB8	TTHA0232
TT5orF1458_at	0.0104988	0.00106	-5.70444	-0.75089	-1.05473	Thermus thermophilus HB8	TTHA1458
TT5orF0626_at	0.0105621	0.00107	5.69059	-0.76538	1.03935	Thermus thermophilus HB8	TTHA0626
TT5orF0186_at	0.0105621	0.00107	5.69029	-0.76569	0.748816	Thermus thermophilus HB8	TTHA0186
TT5orF0086_at	0.0105621	0.00107	5.68822	-0.76786	1.2515	Thermus thermophilus HB8	TTHA0086
AFFX-r2-Bs-dap-5_at	0.0105621	0.00107	5.68616	-0.77002	1.10422	B. subtilis	NA
TT5orF7084_at	0.0106624	0.00109	-5.67325	-0.78355	-2.41182	Thermus thermophilus HB8	TTHY7084
TT5orR4028_at	0.0106965	0.00109	5.66695	-0.79016	0.784202	Thermus thermophilus HB8	TTHB028
TT5orR0619_at	0.0109372	0.00112	5.64068	-0.8178	1.46729	Thermus thermophilus HB8	TTHA0619
TT5orF7018_at	0.0109476	0.00113	-5.63676	-0.82192	-1.66963	Thermus thermophilus HB8	TTHY7018
TT5orR0414_at	0.0109655	0.00113	-5.63214	-0.8268	-0.772526	Thermus thermophilus HB8	TTHA0414
TT5orF0735_at	0.0109811	0.00114	5.62775	-0.83142	0.870302	Thermus thermophilus HB8	TTHA0735
TT5orR0818_at	0.0110599	0.00115	5.61739	-0.84236	0.845897	Thermus thermophilus HB8	TTHA0818
TT5orR1125_at	0.011293	0.00117	-5.59277	-0.86841	-0.913539	Thermus thermophilus HB8	TTHA1125
TT5igR0678_at	0.0114659	0.0012	-5.57411	-0.88821	-1.68643	Thermus thermophilus HB8
TT5orR0042_at	0.0115113	0.0012	-5.56717	-0.89559	-0.968532	Thermus thermophilus HB8	TTHA0042
TT5orF0706_at	0.0115711	0.00121	5.55896	-0.90433	1.59271	Thermus thermophilus HB8	TTHA0706
TT5orR1942_at	0.0115805	0.00122	5.55529	-0.90823	1.35609	Thermus thermophilus HB8	TTHA1942
TT5igF0459_at	0.0117039	0.00124	-5.53919	-0.9254	-1.07188	Thermus thermophilus HB8
TT5orF1331_at	0.0117039	0.00124	-5.53737	-0.92734	-1.27762	Thermus thermophilus HB8	TTHA1331
TT5orR0251_at	0.0117039	0.00124	-5.5359	-0.9289	-1.25359	Thermus thermophilus HB8	TTHA0251
TT5orR0422_at	0.0117094	0.00124	-5.53262	-0.9324	-1.25248	Thermus thermophilus HB8	TTHA0422
TT5orR1111_at	0.0117158	0.00125	5.52743	-0.93795	0.81461	Thermus thermophilus HB8	TTHA1111
TT5igR7001_at	0.0117158	0.00125	-5.52651	-0.93893	-1.40017	Thermus thermophilus HB8
TT5orF1837_at	0.0117922	0.00126	5.51589	-0.95029	1.52063	Thermus thermophilus HB8	TTHA1837
TT5orR1687_at	0.0117922	0.00127	-5.51429	-0.952	-1.67602	Thermus thermophilus HB8	TTHA1687
TT5orF1608_at	0.0118267	0.00127	5.50854	-0.95816	0.803815	Thermus thermophilus HB8	TTHA1608
TT5orF0364_at	0.0119289	0.00129	-5.49695	-0.97058	-0.74828	Thermus thermophilus HB8	TTHA0364
TT5orR1265_at	0.0119859	0.0013	-5.48933	-0.97877	-1.03479	Thermus thermophilus HB8	TTHA1265
TT5orR1674_at	0.0121975	0.00133	-5.46615	-1.00369	-1.47605	Thermus thermophilus HB8	TTHA1674
TT5orR0344_at	0.0121975	0.00133	-5.46596	-1.00389	-0.781855	Thermus thermophilus HB8	TTHA0344
TT5igF0569_at	0.0122176	0.00133	-5.46159	-1.00861	-1.08093	Thermus thermophilus HB8
TT5orR1673_at	0.0122555	0.00134	-5.45574	-1.01491	-1.19417	Thermus thermophilus HB8	TTHA1673
TT5orR0019_at	0.0122859	0.00135	5.45025	-1.02083	0.814188	Thermus thermophilus HB8	TTHA0019
TT5orF1337_at	0.0122859	0.00135	-5.44581	-1.02563	-0.749006	Thermus thermophilus HB8	TTHA1337
TT5igR0456_at	0.0122859	0.00135	-5.44521	-1.02627	-0.775448	Thermus thermophilus HB8
TT5orF0707_at	0.0124853	0.00138	5.42614	-1.04689	0.949607	Thermus thermophilus HB8	TTHA0707
TT5orF0299_at	0.0124884	0.00139	5.42074	-1.05273	1.16748	Thermus thermophilus HB8	TTHA0299
TT5orR1150_at	0.0124884	0.00139	5.41972	-1.05383	0.737715	Thermus thermophilus HB8	TTHA1150
TT5orR1780_at	0.0124884	0.00139	-5.418	-1.0557	-0.768872	Thermus thermophilus HB8	TTHA1780
TT5orR1143_at	0.0125336	0.0014	5.41171	-1.06252	0.895483	Thermus thermophilus HB8	TTHA1143
TT5orR0664_at	0.0126355	0.00141	5.40088	-1.07427	0.974176	Thermus thermophilus HB8	TTHA0664
TT5orF0767_at	0.0126985	0.00143	5.39199	-1.08393	0.837123	Thermus thermophilus HB8	TTHA0767
TT5orR0115_at	0.0126985	0.00143	-5.38999	-1.0861	-0.83441	Thermus thermophilus HB8	TTHA0115
TT5orF0680_at	0.0126985	0.00143	5.38807	-1.08819	1.89989	Thermus thermophilus HB8	TTHA0680
TT5orR1560_at	0.0129701	0.00147	-5.36204	-1.11655	-1.17776	Thermus thermophilus HB8	TTHA1560
TT5igR0563_at	0.0129701	0.00147	5.36152	-1.11711	1.12598	Thermus thermophilus HB8
AFFX-r2-Bs-dap-3_at	0.013161	0.0015	5.34423	-1.136	1.14622	B. subtilis	NA
TT5orF1640_at	0.0131653	0.0015	-5.34137	-1.13914	-0.928767	Thermus thermophilus HB8	TTHA1640
TT5orF0058_at	0.0131666	0.0015	5.33873	-1.14202	0.88795	Thermus thermophilus HB8	TTHA0058
TT5orF0155_at	0.0131898	0.00151	-5.33444	-1.14672	-1.44575	Thermus thermophilus HB8	TTHA0155
TT5igR0774_at	0.0131967	0.00152	-5.32994	-1.15165	-4.03454	Thermus thermophilus HB8
TT5orF1332_at	0.0131967	0.00152	-5.32782	-1.15398	-1.35285	Thermus thermophilus HB8	TTHA1332
TT5orR1670_at	0.0131967	0.00153	-5.32392	-1.15825	-0.954484	Thermus thermophilus HB8	TTHA1670
TT5orF1967_at	0.0131967	0.00153	5.32335	-1.15887	1.10553	Thermus thermophilus HB8	TTHA1967
TT5orR0350_at	0.0131967	0.00153	5.32141	-1.161	0.68348	Thermus thermophilus HB8	TTHA0350
TT5igR7052_at	0.0132033	0.00154	5.31445	-1.16864	1.06355	Thermus thermophilus HB8
TT5orR1693_at	0.0132033	0.00154	-5.31422	-1.16889	-1.18095	Thermus thermophilus HB8	TTHA1693
TT5orR1885_at	0.0132033	0.00154	5.31247	-1.17081	0.900815	Thermus thermophilus HB8	TTHA1885
TT5orR0438_at	0.0132033	0.00155	-5.31104	-1.17238	-0.85464	Thermus thermophilus HB8	TTHA0438
TT5orR0790_at	0.0132321	0.00155	5.3064	-1.17748	0.933943	Thermus thermophilus HB8	TTHA0790
TT5orR1871_at	0.0133559	0.00157	5.29462	-1.19044	0.839473	Thermus thermophilus HB8	TTHA1871
TT5orF1158_at	0.0133981	0.00158	-5.28903	-1.19659	-1.2538	Thermus thermophilus HB8	TTHA1158
TT5orR0112_at	0.0135347	0.0016	-5.27645	-1.21046	-0.913362	Thermus thermophilus HB8	TTHA0112
TT5orF4147_at	0.0136177	0.00161	5.26793	-1.21986	1.03085	Thermus thermophilus HB8	TTHB147
TT5orF4183_at	0.0136583	0.00162	-5.26255	-1.22581	-1.49246	Thermus thermophilus HB8	TTHB183
TT5igF0588_at	0.0136826	0.00163	-5.25688	-1.23207	-6.7638	Thermus thermophilus HB8
TT5orR0108_at	0.0136826	0.00163	-5.25598	-1.23306	-0.735456	Thermus thermophilus HB8	TTHA0108
TT5orF0188_at	0.0138611	0.00166	-5.24069	-1.25	-0.751314	Thermus thermophilus HB8	TTHA0188
TT5igR0426_at	0.0138634	0.00167	-5.23714	-1.25393	-1.27534	Thermus thermophilus HB8
TT5orR1654_at	0.0138634	0.00167	5.23578	-1.25544	0.858821	Thermus thermophilus HB8	TTHA1654
TT5igF0641_at	0.0139001	0.00168	-5.23078	-1.26098	-1.43937	Thermus thermophilus HB8
TT5orR1672_at	0.0140891	0.0017	-5.21502	-1.27849	-1.10586	Thermus thermophilus HB8	TTHA1672
TT5orF1219_at	0.0140918	0.00171	5.21219	-1.28163	0.957151	Thermus thermophilus HB8	TTHA1219
TT5orR1812_at	0.0140918	0.00171	-5.21014	-1.28391	-0.793155	Thermus thermophilus HB8	TTHA1812
TT5igF0605_at	0.0141043	0.00172	5.20639	-1.28809	1.16932	Thermus thermophilus HB8
TT5igR0422_at	0.0141043	0.00172	-5.2046	-1.29008	-1.17963	Thermus thermophilus HB8
TT5orF0158_at	0.0141564	0.00173	5.19863	-1.29673	1.14662	Thermus thermophilus HB8	TTHA0158
TT5orF0387_at	0.0141781	0.00174	5.1948	-1.30099	0.793947	Thermus thermophilus HB8	TTHA0387
TT5orF0660_at	0.0142135	0.00175	5.18982	-1.30655	1.00479	Thermus thermophilus HB8	TTHA0660
TT5orF0360_at	0.0142135	0.00175	-5.18773	-1.30888	-1.12785	Thermus thermophilus HB8	TTHA0360
TT5orF0892_at	0.0142172	0.00175	5.18518	-1.31173	0.789534	Thermus thermophilus HB8	TTHA0892
TT5igR4072_at	0.0143182	0.00177	5.1759	-1.32209	0.821999	Thermus thermophilus HB8
TT5orF1961_at	0.0143187	0.00178	5.17358	-1.32468	0.760062	Thermus thermophilus HB8	TTHA1961
TT5orR1461_at	0.0143733	0.00179	5.16483	-1.33446	0.921235	Thermus thermophilus HB8	TTHA1461
TT5orR1633_at	0.0143733	0.00179	-5.16372	-1.3357	-0.798143	Thermus thermophilus HB8	TTHA1633
TT5orR0276_at	0.0143733	0.00179	5.16283	-1.3367	0.71435	Thermus thermophilus HB8	TTHA0276
TT5igR0145_at	0.0143733	0.0018	5.16077	-1.339	0.994328	Thermus thermophilus HB8
TT5igF0187_at	0.014399	0.00181	-5.15676	-1.3435	-1.60035	Thermus thermophilus HB8
TT5orF1463_at	0.0144428	0.00182	5.15134	-1.34956	2.04567	Thermus thermophilus HB8	TTHA1463
TT5igF0669_at	0.0144428	0.00182	-5.14929	-1.35186	-0.829713	Thermus thermophilus HB8
TT5orR4047_at	0.0146086	0.00184	5.13584	-1.36695	0.787688	Thermus thermophilus HB8	TTHB047
TT5orR0617_at	0.0146781	0.00186	5.12897	-1.37468	0.723574	Thermus thermophilus HB8	TTHA0617
TT5igR0101_at	0.0147146	0.00187	-5.12431	-1.37991	-3.3384	Thermus thermophilus HB8
TT5orF0051_at	0.0148537	0.00189	5.10989	-1.39615	0.75146	Thermus thermophilus HB8	TTHA0051
TT5orR4178_at	0.0148537	0.0019	5.10939	-1.3967	0.938494	Thermus thermophilus HB8	TTHB178
TT5orF0624_at	0.0148537	0.0019	5.1085	-1.39771	0.781778	Thermus thermophilus HB8	TTHA0624
TT5orR0332_at	0.01516	0.00194	5.08637	-1.42268	0.777913	Thermus thermophilus HB8	TTHA0332
TT5orF0316_at	0.0152	0.00195	5.08162	-1.42805	1.94802	Thermus thermophilus HB8	TTHA0316
TT5orF0622_at	0.0154442	0.00199	-5.06393	-1.44807	-1.46785	Thermus thermophilus HB8	TTHA0622
TT5orR1747_at	0.0155513	0.002	-5.05506	-1.45813	-0.713249	Thermus thermophilus HB8	TTHA1747
TT5orR1648_at	0.0155966	0.00202	5.04852	-1.46555	0.90972	Thermus thermophilus HB8	TTHA1648
TT5orR0672_at	0.0155966	0.00202	-5.04793	-1.46623	-1.43816	Thermus thermophilus HB8	TTHA0672
TT5orF1139_at	0.015687	0.00203	-5.04018	-1.47503	-0.932839	Thermus thermophilus HB8	TTHA1139
TT5orF0615_at	0.0159463	0.00207	-5.02217	-1.49552	-0.718043	Thermus thermophilus HB8	TTHA0615
TT5orF1929_at	0.0160414	0.00209	5.01429	-1.5045	0.755419	Thermus thermophilus HB8	TTHA1929
TT5orR0395_at	0.0161243	0.00211	-5.00719	-1.5126	-1.14414	Thermus thermophilus HB8	TTHA0395
TT5orF1848_at	0.0161654	0.00212	5.00263	-1.51781	0.976134	Thermus thermophilus HB8	TTHA1848
TT5orF1864_at	0.0162592	0.00213	-4.99431	-1.52732	-1.72049	Thermus thermophilus HB8	TTHA1864
TT5orF0072_at	0.0162592	0.00214	4.99082	-1.5313	1.07146	Thermus thermophilus HB8	TTHA0072
TT5orF4211_at	0.0162592	0.00214	4.99074	-1.53139	0.94059	Thermus thermophilus HB8	TTHB211
TT5orR1274_at	0.0164221	0.00217	-4.97722	-1.54687	-0.78243	Thermus thermophilus HB8	TTHA1274
TT5igR0369_at	0.0164221	0.00217	4.97697	-1.54716	1.72606	Thermus thermophilus HB8
TT5igF0267_at	0.0165536	0.00219	4.96723	-1.55833	1.27439	Thermus thermophilus HB8
TT5orR4017_at	0.0165625	0.0022	-4.96464	-1.5613	-1.07629	Thermus thermophilus HB8	TTHB017
TT5orF4151_at	0.0166957	0.00223	4.9533	-1.57432	1.21228	Thermus thermophilus HB8	TTHB151
TT5orF1206_at	0.0166957	0.00223	4.95283	-1.57486	0.789007	Thermus thermophilus HB8	TTHA1206
TT5orF7090_at	0.0167507	0.00224	-4.94758	-1.58089	-2.49671	Thermus thermophilus HB8	TTHY7090
TT5orR0702_at	0.0167507	0.00224	-4.94558	-1.5832	-0.854516	Thermus thermophilus HB8	TTHA0702
TT5orF1187_at	0.0168307	0.00226	-4.93888	-1.5909	-0.741743	Thermus thermophilus HB8	TTHA1187
TT5igF0455_at	0.0168307	0.00227	-4.93693	-1.59314	-2.05013	Thermus thermophilus HB8
TT5orF0676_at	0.0168391	0.00227	4.93443	-1.59603	2.01188	Thermus thermophilus HB8	TTHA0676
TT5orR1671_at	0.0168524	0.00228	-4.93164	-1.59924	-1.24229	Thermus thermophilus HB8	TTHA1671
TT5igF0002_at	0.0168879	0.00229	-4.92761	-1.60388	-1.28389	Thermus thermophilus HB8	NA
TT5orF1630_at	0.0169294	0.0023	-4.92325	-1.60891	-0.795659	Thermus thermophilus HB8	TTHA1630
TT5orF0515_at	0.0170504	0.00232	-4.91444	-1.61908	-1.50111	Thermus thermophilus HB8	TTHA0515
AFFX-LysX-5_at	0.0170561	0.00232	4.91212	-1.62176	1.09888	B. subtilis	NA
TT5orR0513_at	0.0170571	0.00233	-4.91006	-1.62414	-0.690497	Thermus thermophilus HB8	TTHA0513
TT5igR0345_at	0.0170619	0.00234	4.90703	-1.62764	0.875556	Thermus thermophilus HB8
TT5igR0329_at	0.0170619	0.00234	-4.90581	-1.62906	-1.57575	Thermus thermophilus HB8
TT5orF4194_at	0.0171346	0.00236	4.89977	-1.63603	1.54873	Thermus thermophilus HB8	TTHB194
TT5orR0948_at	0.0171603	0.00236	4.89636	-1.63998	0.827947	Thermus thermophilus HB8	TTHA0948
TT5orF1335_at	0.0174223	0.0024	-4.87999	-1.65895	-0.976073	Thermus thermophilus HB8	TTHA1335
TT5orF4148_at	0.0174517	0.00241	4.87636	-1.66317	0.921882	Thermus thermophilus HB8	TTHB148
TT5orR0973_at	0.0174517	0.00242	-4.87446	-1.66536	-1.18747	Thermus thermophilus HB8	TTHA0973
TT5igF0280_at	0.0175388	0.00244	4.86662	-1.67447	1.04369	Thermus thermophilus HB8
TT5orR0936_at	0.0175388	0.00245	4.86214	-1.67967	0.661171	Thermus thermophilus HB8	TTHA0936
TT5orR4126_at	0.0175388	0.00245	4.86206	-1.67976	0.891943	Thermus thermophilus HB8	TTHB126
TT5igF0183_at	0.0175388	0.00245	-4.86194	-1.67991	-0.872436	Thermus thermophilus HB8
TT5orF0756_at	0.0176333	0.00247	4.85491	-1.68808	0.799342	Thermus thermophilus HB8	TTHA0756
TT5orR0119_at	0.0176637	0.00248	4.85135	-1.69223	0.681468	Thermus thermophilus HB8	TTHA0119
TT5orR0333_at	0.0178245	0.00251	4.83928	-1.70628	0.753758	Thermus thermophilus HB8	TTHA0333
TT5orR0143_at	0.0178245	0.00251	4.83894	-1.70669	0.882241	Thermus thermophilus HB8	TTHA0143
TT5orF1877_at	0.0178356	0.00252	-4.83512	-1.71113	-0.808445	Thermus thermophilus HB8	TTHA1877
TT5orR1241_at	0.0178356	0.00252	4.83452	-1.71184	0.72172	Thermus thermophilus HB8	TTHA1241
TT5orR1308_at	0.0178734	0.00253	-4.83062	-1.71639	-0.79817	Thermus thermophilus HB8	TTHA1308
TT5orF1884_at	0.0178967	0.00255	4.82559	-1.72225	1.11202	Thermus thermophilus HB8	TTHA1884
TT5orR0427_at	0.0178967	0.00255	4.82442	-1.72363	0.850086	Thermus thermophilus HB8	TTHA0427
TT5igF4079_at	0.0178967	0.00255	-4.82353	-1.72466	-1.06296	Thermus thermophilus HB8
TT5orF1380_at	0.0178967	0.00256	4.8207	-1.72797	0.700027	Thermus thermophilus HB8	TTHA1380
TT5orR1779_at	0.0178967	0.00256	-4.81991	-1.72889	-0.650584	Thermus thermophilus HB8	TTHA1779
TT5orR1753_at	0.0179093	0.00257	4.81737	-1.73186	0.980825	Thermus thermophilus HB8	TTHA1753
TT5igR0258_at	0.017918	0.00258	4.8137	-1.73616	1.04807	Thermus thermophilus HB8
TT5orF1450_at	0.017918	0.00258	4.81316	-1.73678	1.07364	Thermus thermophilus HB8	TTHA1450
TT5orR0244_at	0.0179521	0.00259	-4.80943	-1.74115	-0.868709	Thermus thermophilus HB8	TTHA0244
TT5orF1796_at	0.0179521	0.0026	-4.80764	-1.74325	-0.850428	Thermus thermophilus HB8	TTHA1796
TT5orR4097_at	0.0180076	0.00261	4.80287	-1.74882	1.09706	Thermus thermophilus HB8	TTHB097
TT5orF1525_at	0.0180079	0.00261	4.801	-1.75101	0.695876	Thermus thermophilus HB8	TTHA1525
TT5orR1778_at	0.0180391	0.00262	-4.79753	-1.75508	-0.676624	Thermus thermophilus HB8	TTHA1778
TT5orR0801_at	0.0181011	0.00264	-4.79141	-1.76225	-0.787795	Thermus thermophilus HB8	TTHA0801
TT5orF1383_at	0.0181011	0.00264	4.79062	-1.76319	0.825438	Thermus thermophilus HB8	TTHA1383
TT5igR0630_at	0.0182521	0.00267	-4.78099	-1.77448	-1.38802	Thermus thermophilus HB8
TT5orF1138_at	0.0185228	0.00272	-4.76537	-1.79284	-0.715775	Thermus thermophilus HB8	TTHA1138
TT5orR1225_at	0.0185461	0.00272	4.76237	-1.79637	0.781836	Thermus thermophilus HB8	TTHA1225
TT5orF1114_at	0.0186407	0.00274	-4.7558	-1.80411	-0.684052	Thermus thermophilus HB8	TTHA1114
TT5orF0116_at	0.0186498	0.00275	4.75215	-1.80841	0.660805	Thermus thermophilus HB8	TTHA0116
TT5orR0418_at	0.0186498	0.00276	-4.75172	-1.80892	-0.882675	Thermus thermophilus HB8	TTHA0418
TT5orR1416_at	0.0187478	0.00279	-4.74049	-1.82217	-1.94298	Thermus thermophilus HB8	TTHA1416
TT5orF1327_at	0.0187478	0.00279	-4.73866	-1.82432	-1.60004	Thermus thermophilus HB8	TTHA1327
TT5orF7015_at	0.0187478	0.00279	-4.7386	-1.82439	-2.76185	Thermus thermophilus HB8	TTHY7015
TT5orR0045_at	0.0187478	0.0028	-4.7371	-1.82616	-0.752474	Thermus thermophilus HB8	TTHA0045
TT5orF1745_at	0.0187478	0.0028	4.73696	-1.82633	0.878342	Thermus thermophilus HB8	TTHA1745
TT5igF0458_at	0.0187478	0.00281	-4.73416	-1.82963	-1.32225	Thermus thermophilus HB8
TT5orF1451_at	0.0187478	0.00281	4.73377	-1.8301	0.847287	Thermus thermophilus HB8	TTHA1451
TT5orR0203_at	0.0187478	0.00281	4.73249	-1.83161	0.756201	Thermus thermophilus HB8	TTHA0203
TT5orF1702_at	0.0189625	0.00285	4.72012	-1.84624	0.655851	Thermus thermophilus HB8	TTHA1702
TT5orR0863_at	0.0190096	0.00286	4.71604	-1.85106	0.628703	Thermus thermophilus HB8	TTHA0863
TT5orR4217_at	0.0192305	0.0029	-4.70355	-1.86586	-0.941005	Thermus thermophilus HB8	TTHB217
TT5orF0359_at	0.019271	0.00291	4.69984	-1.87026	1.82194	Thermus thermophilus HB8	TTHA0359
TT5orR0699_at	0.0194034	0.00294	-4.69174	-1.87987	-0.774342	Thermus thermophilus HB8	TTHA0699
TT5igR0041_at	0.0196759	0.00299	4.6757	-1.89894	1.26568	Thermus thermophilus HB8
TT5orF0725_at	0.0196759	0.00299	-4.67535	-1.89936	-1.00992	Thermus thermophilus HB8	TTHA0725
TT5orF0739_at	0.0196789	0.003	4.67217	-1.90314	0.67215	Thermus thermophilus HB8	TTHA0739
TT5orR0769_at	0.0196789	0.00301	4.66983	-1.90593	0.762741	Thermus thermophilus HB8	TTHA0769
TT5orR1490_at	0.0196789	0.00302	4.66764	-1.90853	0.921997	Thermus thermophilus HB8	TTHA1490
TT5orR1200_at	0.0196789	0.00302	4.66689	-1.90943	0.859559	Thermus thermophilus HB8	TTHA1200
TT5orR0580_at	0.0196789	0.00302	4.666	-1.91049	1.15409	Thermus thermophilus HB8	TTHA0580
TT5orF0752_at	0.0196789	0.00303	4.66483	-1.91189	0.637106	Thermus thermophilus HB8	TTHA0752
TT5orF1636_at	0.0197397	0.00304	4.66027	-1.91732	0.687183	Thermus thermophilus HB8	TTHA1636
TT5orR1579_at	0.0197868	0.00306	-4.65436	-1.92437	-1.61644	Thermus thermophilus HB8	TTHA1579
TT5orF0225_at	0.0197868	0.00306	4.65365	-1.92522	0.916507	Thermus thermophilus HB8	TTHA0225
TT5orF4155_at	0.0197868	0.00307	4.65294	-1.92606	0.943081	Thermus thermophilus HB8	TTHB155
TT5orF1431_at	0.0198679	0.00309	4.64582	-1.93456	0.78408	Thermus thermophilus HB8	TTHA1431
TT5orF1078_at	0.0198679	0.00309	4.64577	-1.93462	0.968043	Thermus thermophilus HB8	TTHA1078
TT5orF0175_at	0.0201104	0.00313	-4.63292	-1.94998	-0.692944	Thermus thermophilus HB8	TTHA0175
TT5orF4149_at	0.0201227	0.00314	4.63067	-1.95267	0.748635	Thermus thermophilus HB8	TTHB149
TT5orF1638_at	0.0201242	0.00315	-4.62892	-1.95477	-0.954523	Thermus thermophilus HB8	TTHA1638
TT5orF0222_at	0.0204303	0.0032	-4.61338	-1.97337	-0.633231	Thermus thermophilus HB8	TTHA0222
TT5igF0289_at	0.0204786	0.00322	-4.60762	-1.98029	-1.26605	Thermus thermophilus HB8
TT5orR1523_at	0.0204786	0.00322	4.60675	-1.98133	0.806662	Thermus thermophilus HB8	TTHA1523
TT5orF1338_at	0.0204786	0.00323	-4.60621	-1.98198	-0.623512	Thermus thermophilus HB8	TTHA1338
TT5orR0272_at	0.0207203	0.00327	-4.59255	-1.99838	-1.30406	Thermus thermophilus HB8	TTHA0272
TT5orF0890_at	0.0207203	0.00328	4.59083	-2.00045	0.745996	Thermus thermophilus HB8	TTHA0890
TT5igF0252_at	0.0207203	0.00328	-4.58993	-2.00153	-1.43569	Thermus thermophilus HB8
TT5orR0074_at	0.0207203	0.00329	-4.58884	-2.00284	-0.907122	Thermus thermophilus HB8	TTHA0074
TT5orF4041_at	0.0207634	0.0033	4.5853	-2.00711	1.26843	Thermus thermophilus HB8	TTHB041
TT5orF1744_at	0.0208768	0.00332	4.57868	-2.01507	0.701004	Thermus thermophilus HB8	TTHA1744
TT5orR0495_at	0.0209214	0.00334	4.5751	-2.01939	0.817519	Thermus thermophilus HB8	TTHA0495
TT5orF1882_at	0.0210835	0.00337	4.56642	-2.02984	2.20713	Thermus thermophilus HB8	TTHA1882
TT5igF0478_at	0.0211306	0.00338	4.56276	-2.03426	0.850671	Thermus thermophilus HB8
TT5orF1217_at	0.0211327	0.00339	4.56104	-2.03634	0.772984	Thermus thermophilus HB8	TTHA1217
TT5orF0167_at	0.0211414	0.0034	4.55904	-2.03875	0.896717	Thermus thermophilus HB8	TTHA0167
TT5orF0850_at	0.021189	0.00341	-4.55538	-2.04318	-0.702582	Thermus thermophilus HB8	TTHA0850
TT5orR1610_at	0.0212832	0.00343	-4.54936	-2.05044	-1.84243	Thermus thermophilus HB8	TTHA1610
TT5orR0671_at	0.0212832	0.00344	-4.5476	-2.05257	-1.25486	Thermus thermophilus HB8	TTHA0671
TT5orR1227_at	0.0212832	0.00344	4.5465	-2.0539	0.719592	Thermus thermophilus HB8	TTHA1227
TT5igR0060_at	0.0214032	0.00347	-4.53979	-2.06202	-1.72066	Thermus thermophilus HB8
TT5orR1590_at	0.0215275	0.0035	4.53293	-2.07032	0.880817	Thermus thermophilus HB8	TTHA1590
TT5orR4044_at	0.0216368	0.00352	4.52674	-2.07782	0.852971	Thermus thermophilus HB8	TTHB044
TT5orF7035_at	0.021676	0.00353	-4.52351	-2.08174	-2.46641	Thermus thermophilus HB8	TTHY7035
TT5orF0539_at	0.0218061	0.00356	-4.51649	-2.09025	-0.75724	Thermus thermophilus HB8	TTHA0539
TT5orF1334_at	0.0218361	0.00357	-4.51366	-2.09368	-0.796978	Thermus thermophilus HB8	TTHA1334
TT5orR4219_at	0.0218367	0.00358	-4.51206	-2.09563	-1.22536	Thermus thermophilus HB8	TTHB219
TT5orF1855_at	0.0218593	0.00359	-4.50842	-2.10005	-0.95086	Thermus thermophilus HB8	TTHA1855
TT5orF1520_at	0.0218593	0.0036	4.50716	-2.10158	0.614484	Thermus thermophilus HB8	TTHA1520
TT5igF4054_at	0.0218593	0.00361	4.50484	-2.10439	0.823557	Thermus thermophilus HB8
TT5orR0933_at	0.0218593	0.00361	4.50482	-2.10443	0.790287	Thermus thermophilus HB8	TTHA0933
TT5orR1061_at	0.0221188	0.00366	4.49233	-2.11961	1.16283	Thermus thermophilus HB8	TTHA1061
TT5orR1793_at	0.0221188	0.00366	4.49103	-2.1212	0.746378	Thermus thermophilus HB8	TTHA1793
TT5orR1899_at	0.022127	0.00367	4.48914	-2.1235	0.690066	Thermus thermophilus HB8	TTHA1899
TT5igR0590_at	0.0221481	0.00368	4.48672	-2.12644	1.10735	Thermus thermophilus HB8
TT5orR1328_at	0.0225078	0.00374	4.47066	-2.14602	0.775943	Thermus thermophilus HB8	TTHA1328
TT5orR0886_at	0.0226444	0.00378	-4.46275	-2.15568	-0.738233	Thermus thermophilus HB8	TTHA0886
TT5igR4029_at	0.0226444	0.00378	4.46155	-2.15714	1.07329	Thermus thermophilus HB8
TT5igR4060_at	0.0226444	0.00379	4.46059	-2.15832	0.912215	Thermus thermophilus HB8
TT5orF1336_at	0.0227662	0.00381	-4.45423	-2.16609	-0.721906	Thermus thermophilus HB8	TTHA1336
TT5orR0846_at	0.0229232	0.00385	4.44607	-2.17608	1.37136	Thermus thermophilus HB8	TTHA0846
Tiling-Bs-thr_x_at	0.0229232	0.00386	4.4446	-2.17788	1.02348		NA
TT5orF0551_at	0.0229232	0.00386	-4.44348	-2.17925	-0.890502	Thermus thermophilus HB8	TTHA0551
TT5orR0426_at	0.0231856	0.00391	4.43176	-2.19361	0.636988	Thermus thermophilus HB8	TTHA0426
TT5orR1029_at	0.0233078	0.00394	4.42451	-2.2025	0.83289	Thermus thermophilus HB8	TTHA1029
TT5orR0055_at	0.0233078	0.00395	-4.42384	-2.20332	-0.985166	Thermus thermophilus HB8	TTHA0055
TT5orF1365_at	0.0233078	0.00395	4.42251	-2.20496	0.61055	Thermus thermophilus HB8	TTHA1365
TT5orF0796_at	0.0233586	0.00397	4.41905	-2.2092	0.675541	Thermus thermophilus HB8	TTHA0796
TT5orR0399_at	0.023578	0.00401	4.4092	-2.2213	0.925433	Thermus thermophilus HB8	TTHA0399
TT5orF0408_at	0.0236816	0.00404	-4.40379	-2.22796	-0.656681	Thermus thermophilus HB8	TTHA0408
TT5orR1288_at	0.0237388	0.00405	4.40014	-2.23245	0.753864	Thermus thermophilus HB8	TTHA1288
TT5orR0717_at	0.0237483	0.00406	4.39829	-2.23473	0.822035	Thermus thermophilus HB8	TTHA0717
TT5igR0467_at	0.0239561	0.0041	4.38904	-2.24613	1.38887	Thermus thermophilus HB8
TT5orF0218_at	0.0240157	0.00413	4.38403	-2.2523	0.5828	Thermus thermophilus HB8	TTHA0218
TT5orF4181_at	0.0240157	0.00413	-4.38279	-2.25383	-1.35539	Thermus thermophilus HB8	TTHB181
TT5igR0170_at	0.0240157	0.00413	4.38237	-2.25435	0.999458	Thermus thermophilus HB8
TT5orF1457_at	0.0240328	0.00414	-4.38026	-2.25695	-0.621388	Thermus thermophilus HB8	TTHA1457
TT5orF0085_at	0.0240593	0.00415	4.37781	-2.25998	1.00542	Thermus thermophilus HB8	TTHA0085
TT5orF4024_at	0.0240881	0.00417	-4.37527	-2.26311	-0.811574	Thermus thermophilus HB8	TTHB024
TT5orR0745_at	0.0246126	0.00426	-4.35469	-2.28855	-0.660681	Thermus thermophilus HB8	TTHA0745
TT5orR1911_at	0.0246236	0.00428	-4.35084	-2.29331	-0.816722	Thermus thermophilus HB8	TTHA1911
TT5orF1603_at	0.0246236	0.00429	-4.35008	-2.29425	-0.729682	Thermus thermophilus HB8	TTHA1603
TT5orR1262_at	0.0246236	0.00429	-4.34991	-2.29447	-0.569815	Thermus thermophilus HB8	TTHA1262
TT5orR1781_at	0.0248982	0.00435	-4.33805	-2.30917	-0.588845	Thermus thermophilus HB8	TTHA1781
TT5orF7068_at	0.0248982	0.00435	-4.33719	-2.31023	-1.00954	Thermus thermophilus HB8	TTHY7068
TT5orR1766_at	0.0249498	0.00437	4.33391	-2.3143	0.788056	Thermus thermophilus HB8	TTHA1766
TT5orR1392_at	0.0250714	0.00439	4.32817	-2.32142	0.797709	Thermus thermophilus HB8	TTHA1392
TT5orF4030_at	0.0252052	0.00442	4.32203	-2.32905	1.08877	Thermus thermophilus HB8	TTHB030
TT5orF1366_at	0.0258736	0.00456	4.29635	-2.36101	0.695124	Thermus thermophilus HB8	TTHA1366
TT5orR1062_at	0.0258736	0.00456	4.29611	-2.36131	0.647775	Thermus thermophilus HB8	TTHA1062
TT5orR1095_at	0.0262645	0.00463	-4.28133	-2.37975	-0.647151	Thermus thermophilus HB8	TTHA1095
TT5orF1734_at	0.0262645	0.00464	-4.28008	-2.38131	-0.94645	Thermus thermophilus HB8	TTHA1734
TT5igF0250_at	0.0263182	0.00466	4.27687	-2.38532	0.860958	Thermus thermophilus HB8
TT5orR1595_at	0.0265304	0.0047	4.26801	-2.39639	0.777123	Thermus thermophilus HB8	TTHA1595
TT5igF4009_at	0.0265304	0.00471	4.26629	-2.39854	0.897961	Thermus thermophilus HB8
TT5orR1071_at	0.0265304	0.00472	-4.26558	-2.39943	-1.98767	Thermus thermophilus HB8	TTHA1071
TT5orR1910_at	0.0265328	0.00473	-4.26365	-2.40185	-1.13536	Thermus thermophilus HB8	TTHA1910
TT5igR0244_at	0.0265328	0.00474	-4.2616	-2.40441	-0.898172	Thermus thermophilus HB8
TT5orR1807_at	0.0265328	0.00474	4.26128	-2.40481	0.839527	Thermus thermophilus HB8	TTHA1807
TT5orR4243_at	0.0265339	0.00475	4.25895	-2.40773	0.609747	Thermus thermophilus HB8	TTHB243
TT5orF0794_at	0.0265339	0.00476	4.25763	-2.40938	0.846603	Thermus thermophilus HB8	TTHA0794
TT5igF0130_at	0.0265339	0.00476	-4.25705	-2.41011	-0.847345	Thermus thermophilus HB8
TT5orF1309_at	0.0265448	0.00477	4.2553	-2.41231	0.607805	Thermus thermophilus HB8	TTHA1309
TT5igR0414_at	0.0265906	0.00479	-4.2524	-2.41594	-0.746067	Thermus thermophilus HB8
TT5orR1890_at	0.0267205	0.00482	-4.24675	-2.42302	-0.626014	Thermus thermophilus HB8	TTHA1890
TT5orF0047_at	0.0268032	0.00484	4.24266	-2.42814	0.907345	Thermus thermophilus HB8	TTHA0047
TT5orR0821_at	0.0268354	0.00486	-4.24023	-2.43119	-0.629469	Thermus thermophilus HB8	TTHA0821
TT5orF0652_at	0.0268424	0.00487	4.23856	-2.43328	0.661012	Thermus thermophilus HB8	TTHA0652
TT5orR0129_at	0.0268424	0.00487	-4.23725	-2.43494	-0.667127	Thermus thermophilus HB8	TTHA0129
TT5orR0080_at	0.0268484	0.00488	4.23567	-2.43691	0.85109	Thermus thermophilus HB8	TTHA0080
TT5igR0759_at	0.0268869	0.0049	-4.23305	-2.4402	-0.953702	Thermus thermophilus HB8
TT5orR1647_at	0.0269163	0.00491	4.23073	-2.44312	0.659958	Thermus thermophilus HB8	TTHA1647
TT5orF0229_at	0.0271739	0.00496	4.22106	-2.45527	0.640316	Thermus thermophilus HB8	TTHA0229
TT5orR1121_at	0.0272203	0.00498	-4.21821	-2.45886	-0.743255	Thermus thermophilus HB8	TTHA1121
TT5orR1122_at	0.0272234	0.00499	-4.21629	-2.46127	-0.74018	Thermus thermophilus HB8	TTHA1122
TT5orR1931_at	0.0272234	0.005	4.21492	-2.463	0.844097	Thermus thermophilus HB8	TTHA1931
TT5orR4014_at	0.0272234	0.005	-4.21404	-2.46411	-2.84881	Thermus thermophilus HB8	TTHB014
TT5orR0478_at	0.0277759	0.00511	-4.19523	-2.48781	-0.760992	Thermus thermophilus HB8	TTHA0478
TT5orR1739_at	0.0283764	0.00523	4.17534	-2.51293	0.569328	Thermus thermophilus HB8	TTHA1739
TT5orF1913_at	0.028416	0.00525	4.17251	-2.51651	0.722702	Thermus thermophilus HB8	TTHA1913
TT5orR0943_at	0.028416	0.00526	-4.17145	-2.51785	-0.835581	Thermus thermophilus HB8	TTHA0943
TT5igR0157_at	0.0285226	0.00528	4.16687	-2.52365	0.819982	Thermus thermophilus HB8
TT5orR0716_at	0.0285339	0.00529	4.16519	-2.52577	0.644599	Thermus thermophilus HB8	TTHA0716
TT5orR0512_at	0.0285935	0.00531	-4.16206	-2.52974	-0.547231	Thermus thermophilus HB8	TTHA0512
TT5igF0513_at	0.0287531	0.00535	4.15592	-2.53752	0.871724	Thermus thermophilus HB8
TT5orF0059_at	0.0292471	0.00545	4.1399	-2.55784	0.74836	Thermus thermophilus HB8	TTHA0059
TT5orR0423_at	0.0292825	0.00547	-4.13753	-2.56085	-1.08399	Thermus thermophilus HB8	TTHA0423
TT5orR0701_at	0.0293132	0.00548	-4.13531	-2.56367	-0.982529	Thermus thermophilus HB8	TTHA0701
TT5orR0132_at	0.0295318	0.00555	4.12525	-2.57645	0.871701	Thermus thermophilus HB8	TTHA0132
TT5igF0425_at	0.0295318	0.00555	-4.12451	-2.5774	-2.07316	Thermus thermophilus HB8
TT5orF1132_at	0.0295318	0.00556	4.12386	-2.57823	0.538433	Thermus thermophilus HB8	TTHA1132
TT5orR0538_at	0.0295318	0.00556	-4.12366	-2.57848	-0.741021	Thermus thermophilus HB8	TTHA0538
TT5orF1850_at	0.0295898	0.00558	4.12067	-2.58229	0.763661	Thermus thermophilus HB8	TTHA1850
TT5igR0445_at	0.0296351	0.00559	4.11805	-2.58562	0.853453	Thermus thermophilus HB8
TT5orR1103_at	0.0297245	0.00563	-4.11198	-2.59334	-0.545366	Thermus thermophilus HB8	TTHA1103
TT5orR0114_at	0.0297245	0.00563	4.11179	-2.59359	0.76072	Thermus thermophilus HB8	TTHA0114
TT5orR1565_at	0.0297245	0.00564	4.11156	-2.59388	0.545866	Thermus thermophilus HB8	TTHA1565
TT5orR1101_at	0.0297965	0.00566	-4.10819	-2.59818	-0.687696	Thermus thermophilus HB8	TTHA1101
TT5orR0783_at	0.0298216	0.00568	-4.10516	-2.60205	-0.672287	Thermus thermophilus HB8	TTHA0783
TT5orR6002_at	0.0298216	0.00568	4.10488	-2.6024	0.59973	Thermus thermophilus HB8	TTHC002
TT5orR1917_at	0.0298342	0.00569	4.10323	-2.6045	0.529152	Thermus thermophilus HB8	TTHA1917
TT5orR0446_at	0.0299023	0.00571	-4.09999	-2.60864	-1.05314	Thermus thermophilus HB8	TTHA0446
TT5igR0591_at	0.0299273	0.00572	4.09799	-2.61119	0.718984	Thermus thermophilus HB8
TT5igR0480_at	0.0299554	0.00574	4.0959	-2.61385	3.75189	Thermus thermophilus HB8
TT5orR4022_at	0.030047	0.00577	-4.09089	-2.62025	-1.08877	Thermus thermophilus HB8	TTHB022
TT5orR0136_at	0.030047	0.00577	4.09073	-2.62045	0.633551	Thermus thermophilus HB8	TTHA0136
TT5orF1612_at	0.0300711	0.00579	4.0884	-2.62344	0.565188	Thermus thermophilus HB8	TTHA1612
TT5orR1659_at	0.0300711	0.0058	4.0875	-2.62458	0.608828	Thermus thermophilus HB8	TTHA1659
TT5orR0974_at	0.0301914	0.00583	-4.08281	-2.63057	-0.679626	Thermus thermophilus HB8	TTHA0974
TT5orF0995_at	0.0301995	0.00584	-4.08131	-2.63249	-1.00943	Thermus thermophilus HB8	TTHA0995
TT5igF0557_at	0.0302238	0.00585	-4.07907	-2.63536	-2.01135	Thermus thermophilus HB8
TT5orR0271_at	0.0302238	0.00586	-4.0781	-2.6366	-1.0653	Thermus thermophilus HB8	TTHA0271
TT5orR0633_at	0.0302299	0.00588	4.0755	-2.63992	0.799736	Thermus thermophilus HB8	TTHA0633
TT5orR0999_at	0.0302299	0.00588	4.0754	-2.64004	0.741437	Thermus thermophilus HB8	TTHA0999
TT5igF0099_at	0.0302365	0.00589	4.07396	-2.64189	0.566451	Thermus thermophilus HB8
TT5orF4003_at	0.030386	0.00593	4.06842	-2.64898	0.915688	Thermus thermophilus HB8	TTHB003
TT5orR1914_at	0.030386	0.00593	-4.06724	-2.6505	-1.06011	Thermus thermophilus HB8	TTHA1914
TT5orR0268_at	0.030453	0.00596	4.06411	-2.6545	0.779962	Thermus thermophilus HB8	TTHA0268
TT5orR1142_at	0.0304923	0.00597	4.06176	-2.65751	1.15572	Thermus thermophilus HB8	TTHA1142
TT5orR1754_at	0.0306726	0.00602	4.05448	-2.66685	0.66079	Thermus thermophilus HB8	TTHA1754
TT5orF1223_at	0.0306726	0.00603	4.05424	-2.66715	0.697529	Thermus thermophilus HB8	TTHA1223
TT5orR0640_at	0.0306978	0.00604	4.0523	-2.66964	0.553999	Thermus thermophilus HB8	TTHA0640
TT5orF1140_at	0.0307612	0.00606	-4.04931	-2.67348	-0.615341	Thermus thermophilus HB8	TTHA1140
TT5orR0576_at	0.0308507	0.00609	4.0456	-2.67824	0.783234	Thermus thermophilus HB8	TTHA0576
TT5igF0344_at	0.0308601	0.0061	4.0441	-2.68016	1.14048	Thermus thermophilus HB8
TT5orR1100_at	0.0309939	0.00613	-4.03919	-2.68647	-0.973012	Thermus thermophilus HB8	TTHA1100
TT5orF6010_at	0.0310256	0.00615	4.03639	-2.69007	0.718486	Thermus thermophilus HB8	TTHC010
TT5orR1093_at	0.0310256	0.00616	-4.03586	-2.69075	-0.675925	Thermus thermophilus HB8	TTHA1093
TT5orF1382_at	0.0310732	0.00618	4.03333	-2.694	0.783209	Thermus thermophilus HB8	TTHA1382
TT5orF0616_at	0.0311394	0.0062	-4.0303	-2.6979	-0.608922	Thermus thermophilus HB8	TTHA0616
TT5orF1548_at	0.0311738	0.00621	4.02814	-2.70067	0.917517	Thermus thermophilus HB8	TTHA1548
TT5orR1820_at	0.0313798	0.00627	4.02085	-2.71006	0.503363	Thermus thermophilus HB8	TTHA1820
TT5igR0586_at	0.0313798	0.00628	4.01956	-2.71171	0.713942	Thermus thermophilus HB8
TT5orF0908_at	0.0313798	0.00628	4.0189	-2.71256	0.811927	Thermus thermophilus HB8	TTHA0908
TT5orF0581_at	0.0314049	0.0063	4.01701	-2.715	0.920406	Thermus thermophilus HB8	TTHA0581
TT5igR0408_at	0.0316125	0.00635	-4.01021	-2.72376	-1.05672	Thermus thermophilus HB8
TT5igF0307_at	0.0368199	0.00806	-4.12264	-2.72791	-2.43762	Thermus thermophilus HB8
TT5igF0652_at	0.0317318	0.00638	4.0057	-2.72958	1.10465	Thermus thermophilus HB8
TT5orF1795_at	0.0317318	0.0064	-4.0036	-2.73228	-0.756167	Thermus thermophilus HB8	TTHA1795
TT5orR0406_at	0.0317318	0.00641	4.00114	-2.73547	0.657183	Thermus thermophilus HB8	TTHA0406
TT5orR1113_at	0.0317318	0.00642	4.00098	-2.73566	0.802493	Thermus thermophilus HB8	TTHA1113
TT5orF1192_at	0.0317318	0.00642	4.00077	-2.73594	0.754356	Thermus thermophilus HB8	TTHA1192
TT5orR1276_at	0.0317318	0.00642	-3.99981	-2.73718	-0.718095	Thermus thermophilus HB8	TTHA1276
TT5orR1294_at	0.0322119	0.00653	3.98592	-2.75512	0.780113	Thermus thermophilus HB8	TTHA1294
TT5orF4111_at	0.0323537	0.00657	3.98063	-2.76196	0.854602	Thermus thermophilus HB8	TTHB111
TT5igF0625_at	0.0323537	0.00658	3.97908	-2.76397	1.22969	Thermus thermophilus HB8
Tiling-Bs-phe_x_at	0.0323537	0.00659	3.97864	-2.76453	0.782899		NA
TT5orR1870_at	0.0324885	0.00662	3.97394	-2.77061	0.844521	Thermus thermophilus HB8	TTHA1870
TT5orR0639_at	0.0326531	0.00667	3.9685	-2.77765	0.606795	Thermus thermophilus HB8	TTHA0639
TT5orR0120_at	0.0326596	0.00668	-3.96715	-2.7794	-0.828958	Thermus thermophilus HB8	TTHA0120
TT5orF7076_at	0.0327719	0.00671	3.96308	-2.78468	1.4595	Thermus thermophilus HB8	TTHY7076
TT5orR1509_at	0.0328626	0.00674	3.95958	-2.78922	0.746727	Thermus thermophilus HB8	TTHA1509
TT5orR0642_at	0.0330602	0.00679	3.95336	-2.79728	0.651964	Thermus thermophilus HB8	TTHA0642
TT5orR0667_at	0.0332065	0.00684	-3.94662	-2.80603	-0.939505	Thermus thermophilus HB8	TTHA0667
TT5orF0987_at	0.0332065	0.00685	-3.94594	-2.80692	-0.614131	Thermus thermophilus HB8	TTHA0987
TT5orF1144_at	0.0332065	0.00685	3.94573	-2.80718	0.607932	Thermus thermophilus HB8	TTHA1144
TT5orF0475_at	0.0332065	0.00686	3.94474	-2.80846	0.541387	Thermus thermophilus HB8	TTHA0475
TT5orF1945_at	0.0332065	0.00687	-3.9438	-2.80968	-0.782814	Thermus thermophilus HB8	TTHA1945
TT5orF0192_at	0.0332197	0.00688	3.94201	-2.81201	0.718207	Thermus thermophilus HB8	TTHA0192
TT5orF1022_at	0.0332197	0.00689	3.94115	-2.81314	1.43458	Thermus thermophilus HB8	TTHA1022
TT5orR4100_at	0.0332564	0.0069	-3.93906	-2.81585	-0.764822	Thermus thermophilus HB8	TTHB100
AFFX-r2-Bs-dap-M_at	0.033337	0.00694	3.93492	-2.82123	1.00763	B. subtilis	NA
TT5orR1512_at	0.033337	0.00694	3.93472	-2.82149	0.744972	Thermus thermophilus HB8	TTHA1512
TT5orR1559_at	0.0335313	0.00699	-3.92824	-2.82992	-0.637769	Thermus thermophilus HB8	TTHA1559
TT5orF1471_at	0.0335313	0.007	-3.92754	-2.83083	-0.917818	Thermus thermophilus HB8	TTHA1471
TT5igF0221_at	0.0336272	0.00703	3.92399	-2.83544	1.86709	Thermus thermophilus HB8
TT5orF0154_at	0.0336922	0.00705	-3.92123	-2.83904	-0.74019	Thermus thermophilus HB8	TTHA0154
TT5orF0454_at	0.0340855	0.00715	-3.91037	-2.85319	-1.02321	Thermus thermophilus HB8	TTHA0454
TT5orR1854_at	0.0342652	0.00719	3.90478	-2.86048	0.735744	Thermus thermophilus HB8	TTHA1854
TT5orR1179_at	0.0342652	0.0072	3.90369	-2.8619	0.705068	Thermus thermophilus HB8	TTHA1179
TT5igR0203_at	0.0343522	0.00723	-3.90043	-2.86615	-2.04658	Thermus thermophilus HB8
TT5orF0548_at	0.0344549	0.00726	3.89681	-2.87088	0.570144	Thermus thermophilus HB8	TTHA0548
TT5orR1177_at	0.0350082	0.00739	3.88238	-2.88973	0.695312	Thermus thermophilus HB8	TTHA1177
TT5orR0241_at	0.0351127	0.00742	-3.87877	-2.89446	-0.924535	Thermus thermophilus HB8	TTHA0241
TT5orR1208_at	0.0352237	0.00747	3.87364	-2.90117	0.682178	Thermus thermophilus HB8	TTHA1208
TT5orR4045_at	0.0352237	0.00747	3.87312	-2.90185	0.853726	Thermus thermophilus HB8	TTHB045
TT5igF4022_at	0.0352237	0.00748	3.87224	-2.90299	0.731277	Thermus thermophilus HB8
TT5orF1797_at	0.0352237	0.00748	3.87163	-2.90379	0.798408	Thermus thermophilus HB8	TTHA1797
TT5orR0982_at	0.0352249	0.0075	-3.87026	-2.9056	-0.878251	Thermus thermophilus HB8	TTHA0982
TT5orR1632_at	0.0352249	0.0075	-3.86937	-2.90676	-0.601049	Thermus thermophilus HB8	TTHA1632
TT5orR0586_at	0.0354343	0.00756	-3.86332	-2.91469	-0.573011	Thermus thermophilus HB8	TTHA0586
TT5igF0391_at	0.0354497	0.00757	3.86184	-2.91662	0.867134	Thermus thermophilus HB8
TT5igR7012_at	0.0354875	0.0076	-3.85916	-2.92013	-1.28761	Thermus thermophilus HB8
TT5orR1496_at	0.0354875	0.0076	3.85873	-2.9207	0.589642	Thermus thermophilus HB8	TTHA1496
TT5orF0056_at	0.0356418	0.00765	3.8535	-2.92756	0.680776	Thermus thermophilus HB8	TTHA0056
TT5orR1102_at	0.0356418	0.00766	-3.85291	-2.92834	-0.781762	Thermus thermophilus HB8	TTHA1102
TT5orF0896_at	0.0357546	0.00769	3.84918	-2.93323	0.519755	Thermus thermophilus HB8	TTHA0896
TT5orR1813_at	0.0358035	0.00771	-3.84694	-2.93617	-0.595695	Thermus thermophilus HB8	TTHA1813
AFFX-r2-Bs-lys-5_at	0.0360137	0.00777	3.84098	-2.94399	1.34848	B. subtilis	NA
TT5orR0107_at	0.0362133	0.00782	3.8353	-2.95146	1.28368	Thermus thermophilus HB8	TTHA0107
TT5orF0224_at	0.036329	0.00787	3.82975	-2.95876	0.552609	Thermus thermophilus HB8	TTHA0224
TT5igR0474_at	0.036329	0.00788	3.82858	-2.9603	1.55345	Thermus thermophilus HB8
TT5orR0718_at	0.036329	0.00788	3.8285	-2.9604	0.564899	Thermus thermophilus HB8	TTHA0718
TT5orF4208_at	0.036329	0.00789	-3.8281	-2.96092	-1.55631	Thermus thermophilus HB8	TTHB208
TT5orR0412_at	0.036329	0.0079	3.82718	-2.96213	0.655921	Thermus thermophilus HB8	TTHA0412
TT5orR0623_at	0.0363457	0.00791	3.82571	-2.96407	0.868871	Thermus thermophilus HB8	TTHA0623
TT5igF4090_at	0.036452	0.00794	-3.82221	-2.96868	-1.44735	Thermus thermophilus HB8
TT5orR0631_at	0.0364853	0.00796	-3.82037	-2.9711	-0.705576	Thermus thermophilus HB8	TTHA0631
TT5orF7012_at	0.0367918	0.00804	-3.81237	-2.98164	-2.99252	Thermus thermophilus HB8	TTHY7012
TT5igR0082_at	0.0368564	0.00807	3.80876	-2.9864	1.09954	Thermus thermophilus HB8
TT5igF4065_at	0.036955	0.00811	-3.80547	-2.99073	-0.738741	Thermus thermophilus HB8
TT5orR0793_at	0.0374065	0.00822	-3.79438	-3.00537	-0.553728	Thermus thermophilus HB8	TTHA0793
TT5orF0336_at	0.0375132	0.00825	3.79096	-3.00989	0.927346	Thermus thermophilus HB8	TTHA0336
TT5orR0700_at	0.0382338	0.00842	-3.77423	-3.03201	-0.816039	Thermus thermophilus HB8	TTHA0700
TT5igR0696_at	0.0382929	0.00844	-3.77189	-3.0351	-1.00912	Thermus thermophilus HB8
TT5orR0130_at	0.0384061	0.00848	-3.7684	-3.03972	-0.719079	Thermus thermophilus HB8	TTHA0130
TT5igF0403_at	0.0386802	0.00855	3.76149	-3.04887	0.728526	Thermus thermophilus HB8
TT5orF0569_at	0.0388436	0.0086	-3.75697	-3.05486	-0.561667	Thermus thermophilus HB8	TTHA0569
TT5orF4198_at	0.0393174	0.00871	3.74597	-3.06946	0.56603	Thermus thermophilus HB8	TTHB198
TT5orF4101_at	0.0394899	0.00876	-3.74132	-3.07562	-1.63326	Thermus thermophilus HB8	TTHB101
TT5igR0722_at	0.0395545	0.00879	-3.73893	-3.0788	-0.909455	Thermus thermophilus HB8
AFFX-r2-Bs-phe-3_at	0.0397578	0.00885	3.73368	-3.08577	0.986466	B. subtilis	NA
TT5orF0704_at	0.0397659	0.00886	-3.73246	-3.08739	-0.573957	Thermus thermophilus HB8	TTHA0704
TT5orR1663_at	0.0397793	0.00888	-3.73063	-3.08982	-0.635419	Thermus thermophilus HB8	TTHA1663
TT5igR0438_at	0.0397793	0.00889	-3.73009	-3.09055	-0.774559	Thermus thermophilus HB8
TT5orR0517_at	0.040321	0.00902	3.71799	-3.10664	0.961235	Thermus thermophilus HB8	TTHA0517
TT5orR0396_at	0.0404592	0.00906	-3.71415	-3.11175	-0.695976	Thermus thermophilus HB8	TTHA0396
TT5orF1609_at	0.0405437	0.00909	3.71141	-3.11541	0.783829	Thermus thermophilus HB8	TTHA1609
TT5orF1466_at	0.0408283	0.00917	-3.70466	-3.1244	-0.716583	Thermus thermophilus HB8	TTHA1466
TT5orR1578_at	0.0408834	0.00921	-3.70119	-3.12903	-1.40553	Thermus thermophilus HB8	TTHA1578
TT5orF4117_at	0.0408834	0.00921	3.70049	-3.12996	1.12489	Thermus thermophilus HB8	TTHB117
AFFX-DapX-3_at	0.0408834	0.00922	3.69991	-3.13073	1.01532	B. subtilis	NA
TT5orR1939_at	0.0408834	0.00923	3.69942	-3.13139	0.835992	Thermus thermophilus HB8	TTHA1939
TT5igR0309_at	0.0408912	0.00924	-3.69823	-3.13298	-1.19366	Thermus thermophilus HB8
TT5orR0185_at	0.0411599	0.00931	-3.69187	-3.14147	-0.623002	Thermus thermophilus HB8	TTHA0185
TT5orF4081_at	0.0413327	0.00936	3.68743	-3.14739	0.776534	Thermus thermophilus HB8	TTHB081
TT5orR0757_at	0.0417491	0.00947	3.67825	-3.15965	1.36647	Thermus thermophilus HB8	TTHA0757
TT5igF6007_at	0.0418588	0.00951	3.6751	-3.16387	0.755636	Thermus thermophilus HB8
TT5orF0566_at	0.0420042	0.00955	3.67126	-3.16901	0.828227	Thermus thermophilus HB8	TTHA0566
TT5igR0273_at	0.0420674	0.0096	3.66703	-3.17466	0.826441	Thermus thermophilus HB8
TT5orF1391_at	0.0420674	0.0096	-3.66667	-3.17515	-0.59693	Thermus thermophilus HB8	TTHA1391
TT5orR0817_at	0.0420674	0.00961	3.66637	-3.17555	0.546137	Thermus thermophilus HB8	TTHA0817
TT5orF0374_at	0.0420674	0.00961	3.66596	-3.1761	0.687135	Thermus thermophilus HB8	TTHA0374
TT5orF1596_at	0.0425934	0.00975	3.65487	-3.19094	0.575114	Thermus thermophilus HB8	TTHA1596
TT5orR1235_at	0.0426686	0.00978	3.65243	-3.19422	0.641138	Thermus thermophilus HB8	TTHA1235
TT5orR0235_at	0.0427816	0.00981	-3.64928	-3.19844	-0.871168	Thermus thermophilus HB8	TTHA0235
TT5igR0396_at	0.0429299	0.00986	-3.64547	-3.20355	-2.73608	Thermus thermophilus HB8
TT5orR0867_at	0.043521	0.01	3.63201	-3.22161	0.937109	Thermus thermophilus HB8	TTHA0867
TT5orF1333_at	0.043521	0.01	-3.63156	-3.22222	-0.746705	Thermus thermophilus HB8	TTHA1333
TT5orR0346_at	0.043521	0.01	-3.63139	-3.22244	-0.742204	Thermus thermophilus HB8	TTHA0346
TT5orF1133_at	0.0436772	0.0101	3.6275	-3.22768	1.31086	Thermus thermophilus HB8	TTHA1133
TT5orR0267_at	0.0438284	0.0101	3.62304	-3.23366	0.520456	Thermus thermophilus HB8	TTHA0267
TT5orF1373_at	0.0438284	0.0102	-3.62075	-3.23675	-0.484163	Thermus thermophilus HB8	TTHA1373
TT5orR1926_at	0.0438284	0.0102	3.61897	-3.23913	0.542324	Thermus thermophilus HB8	TTHA1926
TT5orF1159_at	0.0438284	0.0102	-3.61887	-3.23928	-0.600024	Thermus thermophilus HB8	TTHA1159
TT5igF0312_at	0.0438284	0.0102	-3.61869	-3.23952	-2.05339	Thermus thermophilus HB8
TT5orR1900_at	0.0438284	0.0102	3.61841	-3.23989	0.491177	Thermus thermophilus HB8	TTHA1900
TT5orR0164_at	0.0438284	0.0102	3.61773	-3.2408	0.818261	Thermus thermophilus HB8	TTHA0164
TT5orF0226_at	0.0442163	0.0103	3.60964	-3.25169	0.91975	Thermus thermophilus HB8	TTHA0226
TT5orF0088_at	0.0442565	0.0103	3.60792	-3.25401	0.692969	Thermus thermophilus HB8	TTHA0088
TT5orF4182_at	0.0442594	0.0104	-3.60606	-3.25652	-1.1998	Thermus thermophilus HB8	TTHB182
TT5igF0392_at	0.0442594	0.0104	3.60589	-3.25674	1.25361	Thermus thermophilus HB8
TT5igF0456_at	0.0442975	0.0104	3.60421	-3.259	1.15558	Thermus thermophilus HB8
TT5orF0200_at	0.0446522	0.0105	3.59647	-3.26944	0.648001	Thermus thermophilus HB8	TTHA0200
TT5orF7032_at	0.0446522	0.0105	-3.59583	-3.27029	-3.50979	Thermus thermophilus HB8	TTHY7032
TT5orR1013_at	0.0448935	0.0106	3.59052	-3.27746	0.650426	Thermus thermophilus HB8	TTHA1013
TT5orF4089_at	0.0451107	0.0106	-3.58566	-3.28401	-0.778683	Thermus thermophilus HB8	TTHB089
TT5orF0123_at	0.0454244	0.0107	-3.57912	-3.29284	-1.37565	Thermus thermophilus HB8	TTHA0123
TT5orF1494_at	0.0454703	0.0107	3.57639	-3.29653	0.551749	Thermus thermophilus HB8	TTHA1494
TT5orR0742_at	0.0454703	0.0107	-3.57594	-3.29714	-0.676128	Thermus thermophilus HB8	TTHA0742
TT5orF6012_at	0.0454703	0.0108	-3.57539	-3.29787	-0.628617	Thermus thermophilus HB8	TTHC012
TT5orF0493_at	0.0455676	0.0108	3.57251	-3.30177	0.747579	Thermus thermophilus HB8	TTHA0493
TT5orF0638_at	0.0455676	0.0108	3.57174	-3.30281	0.606583	Thermus thermophilus HB8	TTHA0638
TT5orR4238_at	0.0456842	0.0109	-3.56782	-3.30811	-0.890876	Thermus thermophilus HB8	TTHB238
TT5igR0159_at	0.0456842	0.0109	-3.56762	-3.30838	-0.749163	Thermus thermophilus HB8
TT5orF0989_at	0.0456842	0.0109	3.56679	-3.3095	0.662461	Thermus thermophilus HB8	TTHA0989
TT5orF0471_at	0.0456942	0.0109	-3.56565	-3.31104	-0.945791	Thermus thermophilus HB8	TTHA0471
TT5igF0225_at	0.0458436	0.0109	-3.56208	-3.31587	-0.681484	Thermus thermophilus HB8
TT5orR0343_at	0.0458712	0.011	-3.56063	-3.31783	-0.615098	Thermus thermophilus HB8	TTHA0343
TT5igF0379_at	0.0459028	0.011	-3.55912	-3.31987	-0.712775	Thermus thermophilus HB8
TT5orR1508_at	0.0459428	0.011	3.55703	-3.3227	0.567918	Thermus thermophilus HB8	TTHA1508
TT5orR0238_at	0.0459428	0.011	3.55637	-3.32359	0.648581	Thermus thermophilus HB8	TTHA0238
TT5orF0909_at	0.0459428	0.011	3.55555	-3.3247	0.602362	Thermus thermophilus HB8	TTHA0909
TT5orF4231_at	0.0460571	0.0111	3.55261	-3.32868	0.959982	Thermus thermophilus HB8	TTHB231
TT5orR0998_at	0.0461136	0.0111	3.55068	-3.3313	0.719436	Thermus thermophilus HB8	TTHA0998
TT5orR0670_at	0.046327	0.0112	-3.54547	-3.33836	-1.22528	Thermus thermophilus HB8	TTHA0670
TT5orR1544_at	0.046327	0.0112	-3.54509	-3.33888	-0.670934	Thermus thermophilus HB8	TTHA1544
TT5orF7014_at	0.046335	0.0112	-3.54366	-3.3408	-2.15249	Thermus thermophilus HB8	TTHY7014
TT5orF0266_at	0.046335	0.0112	3.54305	-3.34163	0.671435	Thermus thermophilus HB8	TTHA0266
TT5orF4066_at	0.0463509	0.0112	3.54183	-3.34328	0.502424	Thermus thermophilus HB8	TTHB066
TT5orR0214_at	0.0465714	0.0113	-3.5371	-3.3497	-0.78042	Thermus thermophilus HB8	TTHA0214
TT5orR0289_at	0.046914	0.0114	-3.5303	-3.35892	-0.532714	Thermus thermophilus HB8	TTHA0289
TT5orR4127_at	0.0469673	0.0114	-3.52846	-3.36142	-0.876289	Thermus thermophilus HB8	TTHB127
TT5orF0252_at	0.0470884	0.0114	3.52546	-3.36549	0.556668	Thermus thermophilus HB8	TTHA0252
TT5orR1580_at	0.0472258	0.0115	-3.5222	-3.36991	-1.04686	Thermus thermophilus HB8	TTHA1580
TT5orR0969_at	0.0475717	0.0116	-3.51545	-3.37908	-1.26957	Thermus thermophilus HB8	TTHA0969
TT5orR1808_at	0.0477231	0.0116	3.51194	-3.38386	0.570361	Thermus thermophilus HB8	TTHA1808
TT5igF4015_at	0.0477231	0.0117	-3.51105	-3.38506	-1.52169	Thermus thermophilus HB8
TT5igF0452_at	0.0478953	0.0117	3.50725	-3.39023	1.22006	Thermus thermophilus HB8
TT5orR4220_at	0.0481517	0.0118	-3.50208	-3.39727	-0.750142	Thermus thermophilus HB8	TTHB220
TT5igR0427_at	0.0482544	0.0118	-3.49945	-3.40084	-0.932253	Thermus thermophilus HB8
TT5igR0061_at	0.0483911	0.0119	3.49628	-3.40516	0.949103	Thermus thermophilus HB8
TT5orR1765_at	0.0491388	0.0121	-3.48318	-3.423	-0.975281	Thermus thermophilus HB8	TTHA1765
TT5orF1643_at	0.0493698	0.0122	-3.47797	-3.43011	-0.711139	Thermus thermophilus HB8	TTHA1643
TT5orR4197_at	0.0493698	0.0122	3.47708	-3.43132	1.38524	Thermus thermophilus HB8	TTHB197
TT5igR0066_at	0.0493698	0.0122	3.47645	-3.43218	0.743348	Thermus thermophilus HB8
TT5igR4040_at	0.0493698	0.0122	-3.47577	-3.4331	-1.01661	Thermus thermophilus HB8
TT5orR0921_at	0.0500279	0.0124	3.46437	-3.44867	1.18774	Thermus thermophilus HB8	TTHA0921
TT5orF0492_at	0.0501221	0.0124	3.46196	-3.45195	0.59035	Thermus thermophilus HB8	TTHA0492
TT5orR0898_at	0.0504498	0.0125	-3.45589	-3.46025	-0.988639	Thermus thermophilus HB8	TTHA0898
TT5igF0331_at	0.0506931	0.0126	-3.45118	-3.46669	-0.785168	Thermus thermophilus HB8
TT5igF0567_at	0.0509251	0.0126	3.44666	-3.47287	0.730343	Thermus thermophilus HB8
TT5orF0100_at	0.0510595	0.0127	3.44366	-3.47696	0.520016	Thermus thermophilus HB8	TTHA0100
TT5orR0856_at	0.0511924	0.0128	-3.4398	-3.48225	-0.609032	Thermus thermophilus HB8	TTHA0856
TT5igR0239_at	0.0511924	0.0128	-3.4398	-3.48226	-0.673667	Thermus thermophilus HB8
TT5igR0579_at	0.0512656	0.0128	3.43776	-3.48504	0.64584	Thermus thermophilus HB8
TT5igR0569_at	0.0515576	0.0129	-3.43238	-3.49242	-0.692643	Thermus thermophilus HB8
TT5igR0198_at	0.051584	0.0129	-3.43107	-3.49421	-1.92118	Thermus thermophilus HB8
TT5orF0066_at	0.0518012	0.013	3.42686	-3.49998	0.657912	Thermus thermophilus HB8	TTHA0066
TT5igR4068_at	0.0519956	0.013	3.423	-3.50526	1.04712	Thermus thermophilus HB8
TT5orF0894_at	0.0521607	0.0131	-3.41961	-3.50991	-0.51443	Thermus thermophilus HB8	TTHA0894
TT5igF6002_at	0.0524129	0.0132	3.41491	-3.51635	0.845895	Thermus thermophilus HB8
TT5orR1273_at	0.0524359	0.0132	-3.41367	-3.51806	-0.615405	Thermus thermophilus HB8	TTHA1273
TT5orR0708_at	0.0529126	0.0133	-3.40566	-3.52905	-0.458706	Thermus thermophilus HB8	TTHA0708
TT5orR1783_at	0.0530318	0.0134	-3.403	-3.53271	-0.547396	Thermus thermophilus HB8	TTHA1783
TT5orF0014_at	0.05306	0.0134	3.40169	-3.53451	0.650966	Thermus thermophilus HB8	TTHA0014
TT5orF1370_at	0.0531557	0.0134	3.39878	-3.5385	0.565727	Thermus thermophilus HB8	TTHA1370
TT5orF1444_at	0.0531557	0.0135	3.39757	-3.54017	0.673652	Thermus thermophilus HB8	TTHA1444
TT5igR0482_at	0.0531557	0.0135	3.39713	-3.54077	0.659692	Thermus thermophilus HB8
TT5orF1891_at	0.0531557	0.0135	3.39671	-3.54134	0.499158	Thermus thermophilus HB8	TTHA1891
TT5orF7088_at	0.0533124	0.0135	-3.39352	-3.54573	-1.5227	Thermus thermophilus HB8	TTHY7088
TT5orF0990_at	0.0534557	0.0136	-3.39053	-3.54984	-0.896946	Thermus thermophilus HB8	TTHA0990
TT5igF0533_at	0.0535283	0.0136	3.38796	-3.55337	0.704892	Thermus thermophilus HB8
TT5orR0949_at	0.0535283	0.0136	-3.38769	-3.55374	-0.847481	Thermus thermophilus HB8	TTHA0949
TT5orR1920_at	0.0543476	0.0139	-3.37491	-3.57133	-0.727756	Thermus thermophilus HB8	TTHA1920
TT5igF0240_at	0.0544229	0.0139	3.37294	-3.57403	0.691776	Thermus thermophilus HB8
TT5orR1412_at	0.0545706	0.0139	3.36994	-3.57817	0.611031	Thermus thermophilus HB8	TTHA1412
TT5orR1746_at	0.0545747	0.014	-3.36901	-3.57945	-0.66497	Thermus thermophilus HB8	TTHA1746
TT5orF7075_at	0.054749	0.014	-3.36564	-3.5841	-0.60441	Thermus thermophilus HB8	TTHY7075
TT5orR0806_at	0.0547954	0.0141	3.36333	-3.58727	0.826426	Thermus thermophilus HB8	TTHA0806
TT5orR1037_at	0.0547954	0.0141	3.36323	-3.58742	0.608755	Thermus thermophilus HB8	TTHA1037
TT5orR1439_at	0.0552759	0.0142	3.35542	-3.59819	0.598181	Thermus thermophilus HB8	TTHA1439
TT5igF0504_at	0.0552759	0.0142	-3.35466	-3.59923	-1.13606	Thermus thermophilus HB8
TT5orR4007_at	0.0554712	0.0143	3.35103	-3.60423	0.672635	Thermus thermophilus HB8	TTHB007
TT5orF0573_at	0.0555653	0.0143	3.34884	-3.60726	0.461414	Thermus thermophilus HB8	TTHA0573
TT5orF0905_at	0.055608	0.0143	3.34738	-3.60928	0.639578	Thermus thermophilus HB8	TTHA0905
TT5orR1575_at	0.0556748	0.0144	-3.34557	-3.61177	-0.832843	Thermus thermophilus HB8	TTHA1575
TT5igR0142_at	0.0564579	0.0146	-3.33337	-3.62863	-1.95711	Thermus thermophilus HB8
TT5igR0514_at	0.0564579	0.0146	-3.33295	-3.6292	-0.788763	Thermus thermophilus HB8
AFFX-r2-Bs-thr-5_s_at	0.0567143	0.0147	3.32856	-3.63527	0.909433	B. subtilis	NA
TT5igF0073_at	0.0568822	0.0148	3.3254	-3.63965	0.931809	Thermus thermophilus HB8	NA
TT5orR0877_at	0.056979	0.0148	3.32252	-3.64362	0.602327	Thermus thermophilus HB8	TTHA0877
TT5orF0751_at	0.056979	0.0148	3.32197	-3.64438	0.561484	Thermus thermophilus HB8	TTHA0751
TT5orF1443_at	0.056979	0.0148	3.3215	-3.64503	0.689777	Thermus thermophilus HB8	TTHA1443
TT5orF1381_at	0.0570267	0.0149	3.31999	-3.64712	0.819752	Thermus thermophilus HB8	TTHA1381
TT5orR0864_at	0.0575839	0.015	3.31158	-3.65877	0.566974	Thermus thermophilus HB8	TTHA0864
TT5orR4015_at	0.0577326	0.0151	-3.30857	-3.66293	-0.618911	Thermus thermophilus HB8	TTHB015
TT5orR1769_at	0.0577326	0.0151	-3.30787	-3.66391	-0.491813	Thermus thermophilus HB8	TTHA1769
TT5orR1129_at	0.0577704	0.0151	3.30651	-3.66579	0.490683	Thermus thermophilus HB8	TTHA1129
TT5igR0277_at	0.0578269	0.0152	3.3049	-3.66802	1.8744	Thermus thermophilus HB8
TT5igR0028_at	0.057894	0.0152	3.30315	-3.67044	0.637477	Thermus thermophilus HB8
TT5orF1312_at	0.057948	0.0152	-3.30158	-3.67262	-0.465698	Thermus thermophilus HB8	TTHA1312
TT5orR4013_at	0.05863	0.0154	-3.29134	-3.68681	-1.03003	Thermus thermophilus HB8	TTHB013
TT5igR0090_at	0.05863	0.0154	3.29081	-3.68755	0.696699	Thermus thermophilus HB8
TT5orF0935_at	0.0589207	0.0155	3.28608	-3.6941	0.560592	Thermus thermophilus HB8	TTHA0935
TT5orR4246_at	0.0589207	0.0156	3.28387	-3.69718	0.549278	Thermus thermophilus HB8	TTHB246
TT5orR1059_at	0.0589207	0.0156	-3.2838	-3.69727	-0.905548	Thermus thermophilus HB8	TTHA1059
TT5igR0255_at	0.0589207	0.0156	3.28354	-3.69763	1.09517	Thermus thermophilus HB8
TT5orR1302_at	0.0589207	0.0156	-3.28277	-3.6987	-0.568729	Thermus thermophilus HB8	TTHA1302
TT5orF1786_at	0.0590731	0.0156	-3.27993	-3.70265	-0.582016	Thermus thermophilus HB8	TTHA1786
TT5orR1293_at	0.0591897	0.0157	3.27756	-3.70593	0.685332	Thermus thermophilus HB8	TTHA1293
TT5orF0811_at	0.0593759	0.0158	3.27351	-3.71156	0.683437	Thermus thermophilus HB8	TTHA0811
TT5orF1713_at	0.0593759	0.0158	3.27346	-3.71163	0.476544	Thermus thermophilus HB8	TTHA1713
TT5orR0985_at	0.0594794	0.0158	-3.27128	-3.71466	-0.730053	Thermus thermophilus HB8	TTHA0985
TT5igF4002_at	0.0595155	0.0159	3.26952	-3.7171	0.691075	Thermus thermophilus HB8
TT5orF1800_at	0.0595155	0.0159	3.26914	-3.71762	0.637512	Thermus thermophilus HB8	TTHA1800
TT5orF1823_at	0.0600036	0.016	-3.26136	-3.72844	-0.674818	Thermus thermophilus HB8	TTHA1823
TT5orF0393_at	0.0600036	0.016	3.2606	-3.72949	0.694301	Thermus thermophilus HB8	TTHA0393
TT5orR1268_at	0.0600036	0.016	-3.26034	-3.72986	-0.739338	Thermus thermophilus HB8	TTHA1268
TT5igF0323_at	0.0603876	0.0162	3.25438	-3.73815	0.78832	Thermus thermophilus HB8
TT5orF7057_at	0.0603876	0.0162	-3.25376	-3.73901	-1.49303	Thermus thermophilus HB8	TTHY7057
TT5igR7051_at	0.060621	0.0163	-3.24995	-3.7443	-2.14829	Thermus thermophilus HB8
TT5orR4216_at	0.0609529	0.0164	-3.24492	-3.75131	-0.633219	Thermus thermophilus HB8	TTHB216
TT5orF0027_at	0.0611858	0.0165	-3.24115	-3.75656	-0.452925	Thermus thermophilus HB8	TTHA0027
TT5orF4236_at	0.0614012	0.0165	-3.23711	-3.76218	-0.431629	Thermus thermophilus HB8	TTHB236
TT5orF1835_at	0.0614012	0.0165	3.2368	-3.76262	1.56454	Thermus thermophilus HB8	TTHA1835
TT5orF0662_at	0.0614444	0.0166	3.23544	-3.76451	0.564644	Thermus thermophilus HB8	TTHA0662
TT5igF0067_at	0.0614704	0.0166	3.2343	-3.7661	0.562423	Thermus thermophilus HB8	NA
TT5orF7005_at	0.0614712	0.0166	-3.23347	-3.76726	-2.24831	Thermus thermophilus HB8	TTHY7005
TT5orR0157_at	0.0617315	0.0167	-3.2294	-3.77293	-0.472225	Thermus thermophilus HB8	TTHA0157
TT5igR7018_at	0.0618387	0.0168	-3.22725	-3.77593	-0.893805	Thermus thermophilus HB8
TT5orR0339_at	0.0623832	0.0169	3.21969	-3.78647	0.647214	Thermus thermophilus HB8	TTHA0339
TT5orF0050_at	0.0624218	0.0169	3.2184	-3.78827	1.10935	Thermus thermophilus HB8	TTHA0050
TT5igF0019_at	0.0625819	0.017	3.21562	-3.79215	0.593509	Thermus thermophilus HB8	NA
TT5orF0723_at	0.0629166	0.0171	3.21071	-3.79901	0.576119	Thermus thermophilus HB8	TTHA0723
TT5orR1564_at	0.0629394	0.0171	3.20962	-3.80052	0.536917	Thermus thermophilus HB8	TTHA1564
TT5orF0555_at	0.0629678	0.0172	-3.20847	-3.80214	-0.537349	Thermus thermophilus HB8	TTHA0555
TT5igR0623_at	0.0631506	0.0172	-3.20543	-3.80637	-1.52571	Thermus thermophilus HB8
TT5igR0303_at	0.0632705	0.0173	-3.20285	-3.80998	-0.971911	Thermus thermophilus HB8
TT5orF1755_at	0.0632705	0.0173	-3.20194	-3.81125	-0.489731	Thermus thermophilus HB8	TTHA1755
TT5igF4089_at	0.0632705	0.0173	-3.20156	-3.81178	-2.11683	Thermus thermophilus HB8
TT5orR0510_at	0.0632829	0.0174	-3.19878	-3.81567	-0.500905	Thermus thermophilus HB8	TTHA0510
TT5igF0143_at	0.0632829	0.0174	-3.19781	-3.81702	-0.534026	Thermus thermophilus HB8
TT5igF0630_at	0.0632829	0.0174	3.19773	-3.81714	0.667172	Thermus thermophilus HB8
TT5orR1751_at	0.0632829	0.0174	3.19732	-3.81771	0.502909	Thermus thermophilus HB8	TTHA1751
TT5orF0353_at	0.0632829	0.0175	3.19537	-3.82043	0.605705	Thermus thermophilus HB8	TTHA0353
TT5orF0755_at	0.0632829	0.0175	3.19533	-3.82049	0.446034	Thermus thermophilus HB8	TTHA0755
TT5orF1966_at	0.0632829	0.0175	3.19476	-3.82129	0.538965	Thermus thermophilus HB8	TTHA1966
TT5igR0567_at	0.0632829	0.0175	3.19459	-3.82152	0.582967	Thermus thermophilus HB8
TT5orR0420_at	0.0632829	0.0175	3.19422	-3.82204	0.513538	Thermus thermophilus HB8	TTHA0420
TT5orR0494_at	0.0633473	0.0175	3.19235	-3.82465	1.16404	Thermus thermophilus HB8	TTHA0494
TT5orF7080_at	0.0633473	0.0176	-3.19123	-3.82621	-1.11072	Thermus thermophilus HB8	TTHY7080
TT5igR0052_at	0.0633473	0.0176	3.19106	-3.82646	0.868716	Thermus thermophilus HB8
TT5igR0757_at	0.0637601	0.0177	-3.18457	-3.83553	-0.645874	Thermus thermophilus HB8
TT5igF0489_at	0.0637601	0.0177	3.1845	-3.83564	0.66648	Thermus thermophilus HB8
TT5orF0463_at	0.0637804	0.0177	3.18346	-3.83708	0.644098	Thermus thermophilus HB8	TTHA0463
TT5orR1435_at	0.0638449	0.0178	-3.1819	-3.83927	-0.489993	Thermus thermophilus HB8	TTHA1435
TT5igF0009_at	0.0638882	0.0178	-3.18059	-3.8411	-0.606314	Thermus thermophilus HB8	NA
TT5orR1594_at	0.0644422	0.018	3.17131	-3.85409	0.569554	Thermus thermophilus HB8	TTHA1594
TT5orR0397_at	0.0644422	0.018	-3.1708	-3.85481	-0.75073	Thermus thermophilus HB8	TTHA0397
TT5orF1947_at	0.0644422	0.018	-3.17066	-3.855	-0.47408	Thermus thermophilus HB8	TTHA1947
TT5orR0254_at	0.0644422	0.018	-3.17012	-3.85576	-0.531946	Thermus thermophilus HB8	TTHA0254
TT5orR1472_at	0.0644422	0.0181	3.16917	-3.8571	0.537849	Thermus thermophilus HB8	TTHA1472
TT5orF0202_at	0.0644422	0.0181	3.16915	-3.85712	0.454298	Thermus thermophilus HB8	TTHA0202
TT5orR0743_at	0.0644422	0.0181	-3.16849	-3.85804	-0.696796	Thermus thermophilus HB8	TTHA0743
TT5orR1305_at	0.0648751	0.0182	3.16259	-3.8663	0.611996	Thermus thermophilus HB8	TTHA1305
TT5igF0479_at	0.065016	0.0183	3.16016	-3.86972	0.95518	Thermus thermophilus HB8
TT5igR0685_at	0.0651832	0.0183	3.15742	-3.87356	0.75957	Thermus thermophilus HB8
TT5orF0459_at	0.0655871	0.0185	-3.15192	-3.88127	-0.768782	Thermus thermophilus HB8	TTHA0459
TT5igR0062_at	0.0658804	0.0186	-3.14774	-3.88713	-2.70766	Thermus thermophilus HB8
TT5igR0205_at	0.0659106	0.0186	3.14661	-3.88871	0.659208	Thermus thermophilus HB8
TT5orF0957_at	0.0662026	0.0187	-3.14247	-3.89453	-0.606295	Thermus thermophilus HB8	TTHA0957
TT5igF4064_at	0.0665635	0.0189	3.13683	-3.90244	0.569316	Thermus thermophilus HB8
TT5orR1044_at	0.0665635	0.0189	3.1363	-3.90319	0.672549	Thermus thermophilus HB8	TTHA1044
TT5orF1738_at	0.0665635	0.0189	3.13601	-3.9036	0.559265	Thermus thermophilus HB8	TTHA1738
TT5orR0345_at	0.0667688	0.0189	-3.13289	-3.90797	-0.521788	Thermus thermophilus HB8	TTHA0345
TT5igR0251_at	0.0668376	0.019	3.13123	-3.91031	0.875856	Thermus thermophilus HB8
TT5orR0835_at	0.0668376	0.019	-3.13006	-3.91194	-0.702298	Thermus thermophilus HB8	TTHA0835
TT5orF1168_at	0.0668376	0.019	3.12904	-3.91339	0.580761	Thermus thermophilus HB8	TTHA1168
TT5orR0191_at	0.0668376	0.019	-3.12904	-3.91339	-0.471022	Thermus thermophilus HB8	TTHA0191
TT5igF0517_at	0.0670222	0.0191	3.12617	-3.91741	0.523858	Thermus thermophilus HB8
TT5orR0327_at	0.0670826	0.0192	-3.12472	-3.91945	-0.655346	Thermus thermophilus HB8	TTHA0327
TT5orF0456_at	0.0672183	0.0192	-3.12242	-3.92269	-0.459841	Thermus thermophilus HB8	TTHA0456
TT5igF0401_at	0.0675966	0.0193	-3.11738	-3.92976	-0.739945	Thermus thermophilus HB8
TT5orF0797_at	0.0678655	0.0194	3.1136	-3.93508	0.482898	Thermus thermophilus HB8	TTHA0797
TT5orR1568_at	0.0679157	0.0195	-3.11195	-3.9374	-0.445047	Thermus thermophilus HB8	TTHA1568
TT5orR1462_at	0.0679157	0.0195	3.11089	-3.93889	0.598361	Thermus thermophilus HB8	TTHA1462
TT5igR0059_at	0.0679157	0.0195	3.11076	-3.93907	0.612489	Thermus thermophilus HB8
TT5orR1963_at	0.0680029	0.0196	-3.10903	-3.94151	-0.615713	Thermus thermophilus HB8	TTHA1963
TT5orF1518_at	0.0682971	0.0197	3.10499	-3.94719	0.510862	Thermus thermophilus HB8	TTHA1518
TT5orF0490_at	0.0688918	0.0198	3.09765	-3.95752	0.570047	Thermus thermophilus HB8	TTHA0490
TT5igF4021_at	0.0689854	0.0199	-3.09587	-3.96004	-0.600761	Thermus thermophilus HB8
TT5igF0519_at	0.0691256	0.02	3.09357	-3.96327	0.717971	Thermus thermophilus HB8
TT5orR0281_at	0.0693141	0.02	-3.09075	-3.96724	-0.434854	Thermus thermophilus HB8	TTHA0281
TT5igR4032_at	0.0697177	0.0202	-3.0856	-3.9745	-0.471811	Thermus thermophilus HB8
TT5orR4221_at	0.0699471	0.0203	-3.08181	-3.97985	-1.53423	Thermus thermophilus HB8	TTHB221
TT5orF1186_at	0.0699471	0.0203	-3.08161	-3.98013	-0.727696	Thermus thermophilus HB8	TTHA1186
TT5orF1167_at	0.0699586	0.0203	3.08074	-3.98136	0.488461	Thermus thermophilus HB8	TTHA1167
TT5orF7033_at	0.0700716	0.0203	-3.07876	-3.98414	-1.35258	Thermus thermophilus HB8	TTHY7033
TT5orF0261_at	0.0701644	0.0204	-3.07701	-3.9866	-0.806349	Thermus thermophilus HB8	TTHA0261
TT5orR1768_at	0.0702491	0.0204	-3.07535	-3.98894	-0.536259	Thermus thermophilus HB8	TTHA1768
TT5orR0502_at	0.0703739	0.0205	-3.07274	-3.99262	-0.548124	Thermus thermophilus HB8	TTHA0502
TT5igR0436_at	0.0703739	0.0205	3.07252	-3.99294	0.544797	Thermus thermophilus HB8
TT5igF0356_at	0.0704367	0.0206	3.0711	-3.99494	0.979802	Thermus thermophilus HB8
TT5orR0443_at	0.0712149	0.0208	-3.06135	-4.0087	-0.520363	Thermus thermophilus HB8	TTHA0443
TT5orR4215_at	0.0712149	0.0208	-3.0613	-4.00877	-1.57284	Thermus thermophilus HB8	TTHB215
TT5orR1185_at	0.0713326	0.0209	-3.05932	-4.01157	-0.551812	Thermus thermophilus HB8	TTHA1185
TT5orR1176_at	0.0714312	0.0209	3.05753	-4.01409	0.512233	Thermus thermophilus HB8	TTHA1176
TT5igR7047_at	0.0714694	0.021	-3.05639	-4.01571	-1.72497	Thermus thermophilus HB8
TT5orR0611_at	0.0716895	0.021	3.05333	-4.02003	0.551609	Thermus thermophilus HB8	TTHA0611
TT5orR1919_at	0.0722514	0.0212	-3.04669	-4.0294	-0.646577	Thermus thermophilus HB8	TTHA1919
TT5igF0300_at	0.0725733	0.0213	-3.0426	-4.03519	-1.53182	Thermus thermophilus HB8
TT5orF4059_at	0.0727415	0.0214	-3.03999	-4.03887	-1.08417	Thermus thermophilus HB8	TTHB059
TT5orF1758_at	0.0727415	0.0214	3.03938	-4.03973	0.419279	Thermus thermophilus HB8	TTHA1758
TT5orR1879_at	0.0733005	0.0216	3.03287	-4.04894	0.45026	Thermus thermophilus HB8	TTHA1879
TT5orF0194_at	0.0733005	0.0216	-3.03215	-4.04997	-0.830237	Thermus thermophilus HB8	TTHA0194
TT5igF0080_at	0.0738412	0.0218	3.02587	-4.05884	1.70718	Thermus thermophilus HB8
TT5orF1822_at	0.0742093	0.022	-3.0214	-4.06517	-0.837072	Thermus thermophilus HB8	TTHA1822
TT5orF0307_at	0.074678	0.0221	-3.01593	-4.07291	-0.488079	Thermus thermophilus HB8	TTHA0307
TT5orF1096_at	0.0748374	0.0222	-3.0136	-4.07621	-0.508155	Thermus thermophilus HB8	TTHA1096
TT5orR0754_at	0.0748445	0.0222	3.0128	-4.07734	0.45563	Thermus thermophilus HB8	TTHA0754
TT5orR1306_at	0.0752457	0.0223	-3.00805	-4.08407	-0.643193	Thermus thermophilus HB8	TTHA1306
TT5orF1131_at	0.0752881	0.0224	3.0069	-4.0857	0.582097	Thermus thermophilus HB8	TTHA1131
TT5orF0142_at	0.0754319	0.0224	3.00474	-4.08876	0.467251	Thermus thermophilus HB8	TTHA0142
TT5igR0643_at	0.0757961	0.0226	-3.0004	-4.09491	-0.862477	Thermus thermophilus HB8
TT5orF0156_at	0.076031	0.0227	-2.99723	-4.0994	-0.79777	Thermus thermophilus HB8	TTHA0156
TT5orF0768_at	0.076031	0.0227	2.99663	-4.10025	0.53645	Thermus thermophilus HB8	TTHA0768
TT5orR1042_at	0.0761115	0.0227	-2.99511	-4.1024	-0.67399	Thermus thermophilus HB8	TTHA1042
TT5igF4076_at	0.0765592	0.0229	2.98956	-4.11028	0.584767	Thermus thermophilus HB8
TT5orR1528_at	0.0765592	0.0229	2.98927	-4.11069	0.415803	Thermus thermophilus HB8	TTHA1528
TT5orR4136_at	0.0772203	0.0231	-2.9821	-4.12086	-0.516038	Thermus thermophilus HB8	TTHB136
TT5igR0377_at	0.0774262	0.0232	-2.97939	-4.12471	-1.68843	Thermus thermophilus HB8
TT5orR0242_at	0.0776699	0.0233	-2.97631	-4.12907	-0.441997	Thermus thermophilus HB8	TTHA0242
TT5orR1549_at	0.0785526	0.0236	2.96713	-4.14211	0.804585	Thermus thermophilus HB8	TTHA1549
TT5igR0447_at	0.0788088	0.0237	2.96398	-4.14658	0.520996	Thermus thermophilus HB8
TT5orR1289_at	0.0789939	0.0238	2.96145	-4.15017	0.556765	Thermus thermophilus HB8	TTHA1289
TT5orF1157_at	0.0789939	0.0238	-2.9608	-4.1511	-0.544735	Thermus thermophilus HB8	TTHA1157
TT5orR0499_at	0.0790114	0.0238	2.95992	-4.15235	0.424581	Thermus thermophilus HB8	TTHA0499
TT5igF0449_at	0.0792457	0.0239	2.95699	-4.15651	0.725409	Thermus thermophilus HB8
TT5igR0280_at	0.0794034	0.024	2.9548	-4.15963	0.897978	Thermus thermophilus HB8
TT5orF1720_at	0.0798096	0.0241	2.95027	-4.16606	0.55724	Thermus thermophilus HB8	TTHA1720
TT5orF0675_at	0.0798206	0.0242	2.94946	-4.16721	1.25531	Thermus thermophilus HB8	TTHA0675
TT5orF1584_at	0.0800956	0.0243	-2.94618	-4.17187	-0.592564	Thermus thermophilus HB8	TTHA1584
TT5igR0522_at	0.0801574	0.0243	2.9449	-4.1737	0.496789	Thermus thermophilus HB8
TT5orF1002_at	0.0808652	0.0245	2.93763	-4.18404	0.544555	Thermus thermophilus HB8	TTHA1002
TT5orR1304_at	0.0808893	0.0246	-2.9367	-4.18536	-0.504841	Thermus thermophilus HB8	TTHA1304
TT5orF0516_at	0.0809214	0.0246	-2.9357	-4.18678	-0.500292	Thermus thermophilus HB8	TTHA0516
TT5orF4039_at	0.0810675	0.0247	2.93365	-4.1897	0.722443	Thermus thermophilus HB8	TTHB039
TT5orF1524_at	0.0813321	0.0248	2.93051	-4.19416	0.398466	Thermus thermophilus HB8	TTHA1524
TT5igF0461_at	0.0814234	0.0248	-2.92886	-4.19651	-1.12421	Thermus thermophilus HB8
TT5orR1181_at	0.0814234	0.0249	-2.928	-4.19773	-0.593394	Thermus thermophilus HB8	TTHA1181
TT5orR4156_at	0.0814234	0.0249	-2.92758	-4.19834	-1.17054	Thermus thermophilus HB8	TTHB156
TT5orF7061_at	0.0814533	0.0249	-2.9266	-4.19972	-2.24784	Thermus thermophilus HB8	TTHY7061
TT5orF0766_at	0.0815866	0.025	2.92469	-4.20246	0.486909	Thermus thermophilus HB8	TTHA0766
TT5orF1188_at	0.0817868	0.0251	-2.92216	-4.20605	-0.700348	Thermus thermophilus HB8	TTHA1188
TT5igF0195_at	0.0819347	0.0252	2.91869	-4.21099	0.616611	Thermus thermophilus HB8
TT5igR4067_at	0.0819347	0.0252	-2.91855	-4.2112	-0.62	Thermus thermophilus HB8
TT5orF0300_at	0.0819347	0.0252	2.9184	-4.21141	0.911972	Thermus thermophilus HB8	TTHA0300
TT5orR1878_at	0.0819347	0.0252	2.91803	-4.21193	0.582311	Thermus thermophilus HB8	TTHA1878
TT5orR0062_at	0.082289	0.0253	2.91412	-4.2175	0.811514	Thermus thermophilus HB8	TTHA0062
TT5orR4234_at	0.0828481	0.0255	2.90811	-4.22606	0.538928	Thermus thermophilus HB8	TTHB234
TT5igF0359_at	0.0828481	0.0256	-2.90769	-4.22666	-1.02188	Thermus thermophilus HB8
TT5orR1151_at	0.0828933	0.0256	2.9066	-4.22822	2.22385	Thermus thermophilus HB8	TTHA1151
TT5igF0284_at	0.0834374	0.0258	-2.90087	-4.23638	-0.694536	Thermus thermophilus HB8
TT5orR4016_at	0.0834374	0.0258	-2.90035	-4.23713	-0.611967	Thermus thermophilus HB8	TTHB016
TT5orR0073_at	0.0834973	0.0258	-2.8991	-4.2389	-0.807386	Thermus thermophilus HB8	TTHA0073
TT5orR1000_at	0.0834973	0.0259	2.89843	-4.23985	0.910083	Thermus thermophilus HB8	TTHA1000
TT5igF0104_at	0.0835856	0.0259	-2.89696	-4.24195	-1.00717	Thermus thermophilus HB8
TT5igR4048_at	0.0837669	0.026	2.89466	-4.24523	0.853934	Thermus thermophilus HB8
TT5igR0364_at	0.0839364	0.0261	-2.89247	-4.24835	-0.693654	Thermus thermophilus HB8
TT5orF0553_at	0.0841284	0.0262	-2.89009	-4.25175	-0.393153	Thermus thermophilus HB8	TTHA0553
AFFX-ThrX-3_at	0.084304	0.0263	2.88717	-4.25591	0.896989	B. subtilis	NA
TT5orF1631_at	0.084304	0.0263	-2.88717	-4.25591	-0.460733	Thermus thermophilus HB8	TTHA1631
TT5orF0098_at	0.0843108	0.0263	2.88643	-4.25697	0.397095	Thermus thermophilus HB8	TTHA0098
TT5orR1343_at	0.0843684	0.0264	-2.88469	-4.25945	-0.466982	Thermus thermophilus HB8	TTHA1343
TT5orR1387_at	0.0843684	0.0264	-2.88456	-4.25964	-0.540695	Thermus thermophilus HB8	TTHA1387
TT5igF4049_at	0.0844977	0.0264	2.88274	-4.26223	0.423988	Thermus thermophilus HB8
TT5orR1763_at	0.0846443	0.0265	-2.88077	-4.26504	-0.708727	Thermus thermophilus HB8	TTHA1763
TT5orR1784_at	0.0851826	0.0267	2.87539	-4.27273	0.876729	Thermus thermophilus HB8	TTHA1784
TT5orR0178_at	0.0855339	0.0268	2.87133	-4.27852	0.404156	Thermus thermophilus HB8	TTHA0178
TT5igR4047_at	0.0855339	0.0268	2.87097	-4.27903	0.667073	Thermus thermophilus HB8
TT5orR0871_at	0.0856513	0.0269	2.86928	-4.28144	0.535539	Thermus thermophilus HB8	TTHA0871
TT5orR1714_at	0.0860697	0.0271	2.86499	-4.28757	0.410104	Thermus thermophilus HB8	TTHA1714
TT5orR0137_at	0.0863937	0.0272	2.86153	-4.29251	0.373039	Thermus thermophilus HB8	TTHA0137
TT5igF0302_at	0.0866307	0.0273	2.85882	-4.29638	0.823146	Thermus thermophilus HB8
TT5orF0347_at	0.0869247	0.0274	2.85564	-4.30093	0.529884	Thermus thermophilus HB8	TTHA0347
TT5orR4019_at	0.0869745	0.0274	-2.85454	-4.3025	-0.856095	Thermus thermophilus HB8	TTHB019
TT5orF0306_at	0.0871121	0.0275	-2.8527	-4.30513	-0.456309	Thermus thermophilus HB8	TTHA0306
TT5orF0389_at	0.0874472	0.0276	2.84918	-4.31015	0.61979	Thermus thermophilus HB8	TTHA0389
TT5orR0216_at	0.0874942	0.0277	-2.84812	-4.31168	-0.448853	Thermus thermophilus HB8	TTHA0216
TT5orF0491_at	0.0876542	0.0278	2.84609	-4.31457	0.465172	Thermus thermophilus HB8	TTHA0491
TT5igF0159_at	0.0878891	0.0279	-2.84311	-4.31884	-0.742558	Thermus thermophilus HB8
TT5igF0001_at	0.0878891	0.0279	-2.84277	-4.31931	-1.10357	Thermus thermophilus HB8	NA
TT5igF0089_at	0.0879414	0.0279	-2.84167	-4.3209	-0.548563	Thermus thermophilus HB8
TT5igR0324_at	0.0880155	0.028	-2.84026	-4.32291	-1.49487	Thermus thermophilus HB8
TT5igR0743_at	0.0880155	0.028	-2.83933	-4.32424	-0.655031	Thermus thermophilus HB8
TT5igR0588_at	0.0880155	0.028	2.83904	-4.32465	0.959118	Thermus thermophilus HB8
TT5igF0515_at	0.0880586	0.0281	2.83802	-4.32612	2.62639	Thermus thermophilus HB8
TT5igF4071_at	0.0880719	0.0281	-2.83724	-4.32722	-2.20666	Thermus thermophilus HB8
TT5orF1968_at	0.0881444	0.0281	2.83597	-4.32904	0.657948	Thermus thermophilus HB8	TTHA1968
TT5orR0565_at	0.0883366	0.0282	2.83369	-4.3323	0.612604	Thermus thermophilus HB8	TTHA0565
TT5igR0606_at	0.088366	0.0283	2.83279	-4.3336	0.671552	Thermus thermophilus HB8
TT5orF0910_at	0.0885828	0.0284	2.83031	-4.33713	0.447143	Thermus thermophilus HB8	TTHA0910
TT5igF0131_at	0.0887692	0.0284	-2.8281	-4.3403	-1.25544	Thermus thermophilus HB8
TT5orF1711_at	0.089089	0.0286	2.82478	-4.34505	0.547568	Thermus thermophilus HB8	TTHA1711
TT5orF1009_at	0.089173	0.0286	2.82342	-4.34699	0.564773	Thermus thermophilus HB8	TTHA1009
TT5orR1195_at	0.0892518	0.0287	2.82211	-4.34886	0.621848	Thermus thermophilus HB8	TTHA1195
TT5orF0291_at	0.0893709	0.0287	-2.82047	-4.35122	-0.423205	Thermus thermophilus HB8	TTHA0291
TT5orF4008_at	0.089748	0.0289	2.8167	-4.35661	0.7461	Thermus thermophilus HB8	TTHB008
TT5orF1539_at	0.0898239	0.0289	-2.81542	-4.35844	-0.566963	Thermus thermophilus HB8	TTHA1539
TT5orR1194_at	0.0899014	0.029	-2.81413	-4.36029	-0.629586	Thermus thermophilus HB8	TTHA1194
TT5orF1255_at	0.0901023	0.0291	2.81183	-4.36359	0.559877	Thermus thermophilus HB8	TTHA1255
TT5orR1155_at	0.0904629	0.0292	2.80823	-4.36874	0.467462	Thermus thermophilus HB8	TTHA1155
TT5igR0116_at	0.0907723	0.0293	-2.80505	-4.37329	-0.565821	Thermus thermophilus HB8
TT5orR0111_at	0.0907963	0.0294	-2.8042	-4.3745	-0.773532	Thermus thermophilus HB8	TTHA0111
TT5orF0331_at	0.0911525	0.0295	2.80021	-4.38022	0.539029	Thermus thermophilus HB8	TTHA0331
TT5orR1419_at	0.0911525	0.0295	-2.80001	-4.3805	-1.08522	Thermus thermophilus HB8	TTHA1419
TT5igF0521_at	0.0912926	0.0296	2.79823	-4.38306	1.08039	Thermus thermophilus HB8
TT5orF0897_at	0.0913177	0.0297	2.79738	-4.38428	0.5277	Thermus thermophilus HB8	TTHA0897
TT5orF1515_at	0.0924083	0.0301	2.78739	-4.39859	0.393861	Thermus thermophilus HB8	TTHA1515
TT5orR1441_at	0.0924083	0.0301	-2.78733	-4.39867	-0.587585	Thermus thermophilus HB8	TTHA1441
TT5orR4068_at	0.0929169	0.0303	2.78264	-4.40539	0.746567	Thermus thermophilus HB8	TTHB068
TT5orF0637_at	0.0930438	0.0303	2.78085	-4.40796	0.473744	Thermus thermophilus HB8	TTHA0637
TT5igR7037_at	0.0930438	0.0304	-2.77981	-4.40945	-1.08279	Thermus thermophilus HB8
TT5orR1049_at	0.0930438	0.0304	2.7797	-4.40961	0.611911	Thermus thermophilus HB8	TTHA1049
TT5orF1526_at	0.0934287	0.0305	2.77602	-4.41489	0.49584	Thermus thermophilus HB8	TTHA1526
TT5igR0533_at	0.0935523	0.0306	2.7744	-4.41721	0.437976	Thermus thermophilus HB8
TT5igF0321_at	0.0941683	0.0308	2.76893	-4.42505	0.48316	Thermus thermophilus HB8
TT5orR4225_at	0.0945817	0.031	2.76507	-4.43059	1.84734	Thermus thermophilus HB8	TTHB225
TT5orF0257_at	0.0955768	0.0313	2.75674	-4.44254	0.411597	Thermus thermophilus HB8	TTHA0257
TT5orF0010_at	0.0956099	0.0314	-2.75584	-4.44383	-1.55629	Thermus thermophilus HB8	TTHA0010
TT5igF0544_at	0.0959054	0.0315	2.75293	-4.448	0.619909	Thermus thermophilus HB8
TT5orF1627_at	0.0960251	0.0316	-2.75138	-4.45023	-1.19623	Thermus thermophilus HB8	TTHA1627
TT5orR1874_at	0.0963383	0.0317	-2.74835	-4.45458	-0.535054	Thermus thermophilus HB8	TTHA1874
TT5orR0161_at	0.096934	0.0319	-2.74293	-4.46235	-0.431431	Thermus thermophilus HB8	TTHA0161
TT5orF1889_at	0.096934	0.032	2.74232	-4.46323	0.381409	Thermus thermophilus HB8	TTHA1889
TT5igR0632_at	0.096934	0.032	2.74191	-4.46382	0.750845	Thermus thermophilus HB8
TT5orR0007_at	0.0969951	0.032	-2.74049	-4.46586	-0.400265	Thermus thermophilus HB8	TTHA0007
TT5igF0400_at	0.0969951	0.0321	-2.74018	-4.46631	-0.709545	Thermus thermophilus HB8
TT5igR0541_at	0.0972259	0.0322	2.73775	-4.46979	1.08221	Thermus thermophilus HB8
TT5orR0858_at	0.0972259	0.0322	-2.73717	-4.47063	-0.399423	Thermus thermophilus HB8	TTHA0858
TT5orR0983_at	0.0974327	0.0323	-2.73485	-4.47396	-0.393859	Thermus thermophilus HB8	TTHA0983
TT5orF1511_at	0.0974327	0.0323	-2.73434	-4.47469	-0.448076	Thermus thermophilus HB8	TTHA1511
TT5igR0262_at	0.162234	0.0681	2.67125	-4.47808	4.89074	Thermus thermophilus HB8
TT5orF0029_at	0.0979391	0.0325	2.72991	-4.48105	0.379733	Thermus thermophilus HB8	TTHA0029
TT5orF0168_at	0.0982053	0.0326	2.72729	-4.48482	0.650025	Thermus thermophilus HB8	TTHA0168
TT5orR0506_at	0.0983303	0.0327	-2.72569	-4.48712	-0.453811	Thermus thermophilus HB8	TTHA0506
TT5orF1006_at	0.0983303	0.0327	-2.7251	-4.48797	-0.388705	Thermus thermophilus HB8	TTHA1006
TT5orR1752_at	0.09944	0.0331	2.71625	-4.50068	0.670811	Thermus thermophilus HB8	TTHA1752
TT5orR4153_at	0.100063	0.0334	2.71079	-4.50853	0.784522	Thermus thermophilus HB8	TTHB153
TT5orR1287_at	0.100063	0.0334	2.71033	-4.50918	0.546505	Thermus thermophilus HB8	TTHA1287
TT5igR7067_at	0.100063	0.0334	-2.70979	-4.50996	-1.90868	Thermus thermophilus HB8
TT5igR0492_at	0.100292	0.0335	2.70721	-4.51367	1.1132	Thermus thermophilus HB8
TT5igR0298_at	0.100292	0.0336	2.70649	-4.5147	1.24254	Thermus thermophilus HB8
TT5igF0201_at	0.100292	0.0336	2.70624	-4.51506	0.895876	Thermus thermophilus HB8
TT5igF0015_at	0.100292	0.0336	-2.70562	-4.51596	-0.536967	Thermus thermophilus HB8	NA
TT5igF0151_at	0.100629	0.0337	2.70254	-4.52038	0.441682	Thermus thermophilus HB8
TT5orR1203_at	0.100742	0.0338	2.70063	-4.52312	0.569653	Thermus thermophilus HB8	TTHA1203
TT5orR0666_at	0.100742	0.0338	-2.70047	-4.52335	-0.669428	Thermus thermophilus HB8	TTHA0666
TT5igR0302_at	0.100857	0.0339	2.69893	-4.52558	1.0904	Thermus thermophilus HB8
TT5orF0748_at	0.100857	0.034	-2.6979	-4.52704	-0.742132	Thermus thermophilus HB8	TTHA0748
TT5orR1275_at	0.100857	0.034	-2.69777	-4.52724	-0.595377	Thermus thermophilus HB8	TTHA1275
TT5igF0365_at	0.101086	0.0341	-2.69549	-4.53051	-0.921818	Thermus thermophilus HB8
TT5orF0460_at	0.101294	0.0342	-2.69337	-4.53356	-0.521863	Thermus thermophilus HB8	TTHA0460
TT5orR0942_at	0.101311	0.0342	2.69263	-4.53463	0.757311	Thermus thermophilus HB8	TTHA0942
TT5orR0338_at	0.101364	0.0343	2.69162	-4.53607	0.450078	Thermus thermophilus HB8	TTHA0338
TT5orF0452_at	0.10138	0.0343	2.69089	-4.53712	0.627252	Thermus thermophilus HB8	TTHA0452
TT5orR0885_at	0.101511	0.0344	-2.68862	-4.54039	-0.444808	Thermus thermophilus HB8	TTHA0885
TT5orF0034_at	0.101511	0.0344	-2.68813	-4.5411	-0.421641	Thermus thermophilus HB8	TTHA0034
TT5orF0117_at	0.101511	0.0344	2.6881	-4.54114	0.463459	Thermus thermophilus HB8	TTHA0117
TT5igF0655_at	0.10176	0.0346	2.68525	-4.54524	0.642276	Thermus thermophilus HB8
TT5orR0549_at	0.10176	0.0346	2.68508	-4.54548	0.385165	Thermus thermophilus HB8	TTHA0549
TT5orR0484_at	0.102032	0.0347	2.68252	-4.54917	0.457761	Thermus thermophilus HB8	TTHA0484
TT5orR1527_at	0.102906	0.035	-2.67566	-4.55904	-0.449777	Thermus thermophilus HB8	TTHA1527
TT5igR0745_at	0.102906	0.035	-2.67506	-4.5599	-0.677674	Thermus thermophilus HB8
TT5orF1075_at	0.104382	0.0356	2.66365	-4.57631	0.49652	Thermus thermophilus HB8	TTHA1075
TT5igR0767_at	0.104382	0.0356	-2.66345	-4.5766	-0.549625	Thermus thermophilus HB8
TT5igR0296_at	0.104481	0.0357	2.66212	-4.57851	0.526539	Thermus thermophilus HB8
TT5orF4069_at	0.104481	0.0357	-2.6608	-4.58042	-0.55892	Thermus thermophilus HB8	TTHB069
TT5orR1825_at	0.104481	0.0357	-2.66056	-4.58076	-0.425813	Thermus thermophilus HB8	TTHA1825
TT5orF1008_at	0.104481	0.0358	-2.66032	-4.5811	-0.451575	Thermus thermophilus HB8	TTHA1008
TT5orF4026_at	0.104827	0.0359	-2.6573	-4.58545	-0.375927	Thermus thermophilus HB8	TTHB026
TT5orF0342_at	0.104989	0.036	2.65557	-4.58795	0.441225	Thermus thermophilus HB8	TTHA0342
TT5igR0311_at	0.105664	0.0363	2.65029	-4.59554	0.867096	Thermus thermophilus HB8
TT5igR0778_at	0.105852	0.0363	2.6484	-4.59827	0.82498	Thermus thermophilus HB8
TT5igR0587_at	0.1074	0.0369	2.63723	-4.61435	0.618038	Thermus thermophilus HB8
TT5orR1818_at	0.107518	0.037	-2.6355	-4.61683	-0.436482	Thermus thermophilus HB8	TTHA1818
TT5igR0761_at	0.107518	0.037	2.63466	-4.61804	0.58965	Thermus thermophilus HB8
TT5igR0750_at	0.107518	0.037	2.63461	-4.61811	0.591386	Thermus thermophilus HB8
TT5igR0064_at	0.107726	0.0371	2.6326	-4.62101	0.439156	Thermus thermophilus HB8
TT5orF0535_at	0.107946	0.0372	2.63051	-4.62402	0.726526	Thermus thermophilus HB8	TTHA0535
TT5orF0655_at	0.10813	0.0373	-2.62868	-4.62666	-0.450213	Thermus thermophilus HB8	TTHA0655
TT5igF0297_at	0.10856	0.0376	-2.62443	-4.63278	-1.40094	Thermus thermophilus HB8
TT5orR4204_at	0.10856	0.0376	2.62404	-4.63334	0.562969	Thermus thermophilus HB8	TTHB204
TT5orR4245_at	0.10856	0.0376	-2.62399	-4.63341	-0.575642	Thermus thermophilus HB8	TTHB245
TT5igF0575_at	0.108796	0.0377	2.62171	-4.63669	0.684432	Thermus thermophilus HB8
TT5igR0261_at	0.108796	0.0377	-2.6212	-4.63742	-1.40063	Thermus thermophilus HB8
TT5orF1316_at	0.108859	0.0378	2.62019	-4.63889	0.736476	Thermus thermophilus HB8	TTHA1316
TT5igF0209_at	0.109233	0.0379	2.6171	-4.64334	1.19362	Thermus thermophilus HB8
TT5igF4068_at	0.109325	0.038	2.61589	-4.64508	0.38552	Thermus thermophilus HB8
TT5orR0006_at	0.109364	0.0381	-2.61476	-4.6467	-0.37959	Thermus thermophilus HB8	TTHA0006
TT5orR0504_at	0.109364	0.0381	2.61443	-4.64718	0.504361	Thermus thermophilus HB8	TTHA0504
TT5orR0197_at	0.109605	0.0382	2.61224	-4.65034	0.455894	Thermus thermophilus HB8	TTHA0197
TT5orF0312_at	0.109621	0.0382	-2.61153	-4.65135	-0.611001	Thermus thermophilus HB8	TTHA0312
TT5orR1074_at	0.109711	0.0383	-2.61035	-4.65307	-0.825899	Thermus thermophilus HB8	TTHA1074
TT5orR1936_at	0.110251	0.0385	2.60619	-4.65906	0.335261	Thermus thermophilus HB8	TTHA1936
TT5orF0838_at	0.110838	0.0388	-2.60174	-4.66546	-0.706645	Thermus thermophilus HB8	TTHA0838
TT5orR1398_at	0.110895	0.0388	2.60001	-4.66796	0.813402	Thermus thermophilus HB8	TTHA1398
TT5orR1047_at	0.110895	0.0389	2.59965	-4.66848	0.46076	Thermus thermophilus HB8	TTHA1047
TT5orF0348_at	0.110895	0.0389	2.59959	-4.66857	0.608111	Thermus thermophilus HB8	TTHA0348
TT5orR0567_at	0.111564	0.0391	2.59464	-4.6757	0.638597	Thermus thermophilus HB8	TTHA0567
TT5igF0174_at	0.111687	0.0392	-2.59325	-4.6777	-1.69278	Thermus thermophilus HB8
TT5orR1237_at	0.111919	0.0393	-2.59115	-4.68073	-0.391399	Thermus thermophilus HB8	TTHA1237
TT5orF1424_at	0.112455	0.0395	-2.5871	-4.68656	-0.976798	Thermus thermophilus HB8	TTHA1424
TT5orR1915_at	0.112962	0.0398	-2.58325	-4.69211	-0.400128	Thermus thermophilus HB8	TTHA1915
TT5orF4209_at	0.113077	0.0399	-2.58097	-4.6954	-1.50589	Thermus thermophilus HB8	TTHB209
TT5igF0296_at	0.113077	0.0399	2.58037	-4.69627	0.850939	Thermus thermophilus HB8
TT5orR0830_at	0.113077	0.0399	2.58037	-4.69627	0.469688	Thermus thermophilus HB8	TTHA0830
TT5igR0147_at	0.113077	0.04	-2.5793	-4.69781	-0.577881	Thermus thermophilus HB8
TT5orR0215_at	0.113077	0.04	-2.57885	-4.69845	-0.553722	Thermus thermophilus HB8	TTHA0215
TT5igR7004_at	0.113077	0.04	-2.57845	-4.69903	-2.13823	Thermus thermophilus HB8
Tiling-Bs-lys_x_at	0.113077	0.04	2.57841	-4.6991	0.459086		NA
TT5orR0118_at	0.113132	0.0401	-2.57744	-4.70049	-0.44647	Thermus thermophilus HB8	TTHA0118
TT5igF0355_at	0.113132	0.0401	-2.57688	-4.70129	-0.720719	Thermus thermophilus HB8
TT5orF0264_at	0.113666	0.0403	-2.57289	-4.70705	-0.40228	Thermus thermophilus HB8	TTHA0264
TT5orF1148_at	0.113731	0.0404	-2.57189	-4.70848	-0.498916	Thermus thermophilus HB8	TTHA1148
TT5orR0054_at	0.113794	0.0404	-2.57091	-4.7099	-0.670961	Thermus thermophilus HB8	TTHA0054
TT5igF0445_at	0.113797	0.0405	2.57031	-4.71077	0.819146	Thermus thermophilus HB8
TT5igR4007_at	0.11457	0.0408	-2.56483	-4.71867	-2.29827	Thermus thermophilus HB8
TT5igR4027_at	0.114619	0.0408	2.56382	-4.72013	0.548751	Thermus thermophilus HB8
TT5igF0291_at	0.114619	0.0409	2.56335	-4.7208	0.841648	Thermus thermophilus HB8
TT5igR0627_at	0.114715	0.0409	2.56217	-4.72251	0.430112	Thermus thermophilus HB8
TT5igF0238_at	0.114913	0.0411	2.5599	-4.72578	1.28227	Thermus thermophilus HB8
TT5orR0511_at	0.114913	0.0411	-2.55916	-4.72684	-0.34743	Thermus thermophilus HB8	TTHA0511
TT5orF0425_at	0.114913	0.0411	-2.5591	-4.72692	-0.62934	Thermus thermophilus HB8	TTHA0425
TT5igF0472_at	0.114913	0.0412	2.55811	-4.72835	0.605159	Thermus thermophilus HB8
TT5igR0732_at	0.114913	0.0412	2.55803	-4.72848	0.484722	Thermus thermophilus HB8
TT5orR0540_at	0.115737	0.0415	2.55229	-4.73675	0.860954	Thermus thermophilus HB8	TTHA0540
TT5orR0799_at	0.116046	0.0416	-2.54978	-4.74037	-0.545297	Thermus thermophilus HB8	TTHA0799
TT5orF1363_at	0.116173	0.0417	2.54788	-4.7431	0.880866	Thermus thermophilus HB8	TTHA1363
TT5igF0171_at	0.116173	0.0418	2.54784	-4.74317	0.751041	Thermus thermophilus HB8
TT5orR0128_at	0.117625	0.0423	-2.53829	-4.75694	-0.428336	Thermus thermophilus HB8	TTHA0128
TT5orR1170_at	0.117961	0.0425	-2.53566	-4.76073	-0.372525	Thermus thermophilus HB8	TTHA1170
TT5orF1620_at	0.118508	0.0427	2.53162	-4.76656	0.496223	Thermus thermophilus HB8	TTHA1620
TT5orF0363_at	0.118508	0.0427	2.53117	-4.7672	0.540561	Thermus thermophilus HB8	TTHA0363
TT5orR1174_at	0.118566	0.0428	-2.53024	-4.76854	-0.397087	Thermus thermophilus HB8	TTHA1174
TT5orF0023_at	0.118736	0.0429	-2.52864	-4.77085	-0.477091	Thermus thermophilus HB8	TTHA0023
TT5orF1395_at	0.118809	0.0429	2.52762	-4.77232	0.548341	Thermus thermophilus HB8	TTHA1395
TT5igF4013_at	0.119042	0.0431	2.52564	-4.77518	0.617454	Thermus thermophilus HB8
TT5igR0741_at	0.119082	0.0431	-2.52483	-4.77635	-0.543711	Thermus thermophilus HB8
TT5orF1660_at	0.119254	0.0432	2.52322	-4.77868	0.498617	Thermus thermophilus HB8	TTHA1660
TT5igR0434_at	0.119299	0.0434	2.52035	-4.7828	0.431813	Thermus thermophilus HB8
TT5orR0972_at	0.119299	0.0434	-2.52026	-4.78294	-0.773654	Thermus thermophilus HB8	TTHA0972
TT5orF1399_at	0.119299	0.0434	-2.52024	-4.78297	-0.366352	Thermus thermophilus HB8	TTHA1399
TT5igR4062_at	0.119299	0.0434	2.52006	-4.78323	0.442261	Thermus thermophilus HB8
TT5orF1027_at	0.119299	0.0434	2.52001	-4.7833	0.479678	Thermus thermophilus HB8	TTHA1027
TT5igR0749_at	0.119299	0.0434	2.51919	-4.78448	0.530842	Thermus thermophilus HB8
TT5orR1522_at	0.119299	0.0435	2.51879	-4.78506	0.370086	Thermus thermophilus HB8	TTHA1522
TT5orR1421_at	0.119299	0.0435	-2.5184	-4.78562	-0.684694	Thermus thermophilus HB8	TTHA1421
TT5igR4065_at	0.119882	0.0438	2.514	-4.79196	1.4062	Thermus thermophilus HB8
TT5igR0141_at	0.119882	0.0438	-2.51342	-4.7928	-0.573329	Thermus thermophilus HB8
AFFX-PheX-5_at	0.119882	0.0438	2.51319	-4.79314	0.504814	B. subtilis	NA
TT5igF0366_at	0.120131	0.0439	2.51088	-4.79647	0.438216	Thermus thermophilus HB8
TT5orR1830_at	0.120131	0.044	2.51057	-4.79692	0.350898	Thermus thermophilus HB8	TTHA1830
TT5orR0842_at	0.120362	0.0441	-2.50835	-4.80012	-0.358158	Thermus thermophilus HB8	TTHA0842
TT5orF0025_at	0.120362	0.0441	2.50805	-4.80054	1.28279	Thermus thermophilus HB8	TTHA0025
TT5orF1583_at	0.120508	0.0442	-2.50662	-4.80261	-0.463316	Thermus thermophilus HB8	TTHA1583
TT5orR0217_at	0.120634	0.0443	-2.50531	-4.80451	-0.540007	Thermus thermophilus HB8	TTHA0217
TT5igR0360_at	0.120811	0.0444	2.50348	-4.80714	1.66563	Thermus thermophilus HB8
AFFX-r2-Bs-lys-M_at	0.120811	0.0444	2.50313	-4.80765	0.716092	B. subtilis	NA
TT5orR0357_at	0.120844	0.0445	2.50237	-4.80874	3.89648	Thermus thermophilus HB8	TTHA0357
TT5orF0131_at	0.121093	0.0446	2.50033	-4.81169	0.449999	Thermus thermophilus HB8	TTHA0131
TT5orR1814_at	0.121168	0.0447	-2.4988	-4.81389	-0.428525	Thermus thermophilus HB8	TTHA1814
TT5igR0770_at	0.121168	0.0447	2.49855	-4.81425	0.467022	Thermus thermophilus HB8
TT5orF0233_at	0.121168	0.0447	2.4982	-4.81476	0.447843	Thermus thermophilus HB8	TTHA0233
TT5rrF0003_at	0.121214	0.0448	-2.49737	-4.81595	-0.549686	Thermus thermophilus HB8
TT5orF0852_at	0.12261	0.0453	-2.48857	-4.82864	-0.33329	Thermus thermophilus HB8	TTHA0852
TT5igF0133_at	0.123213	0.0456	2.48449	-4.83453	0.716266	Thermus thermophilus HB8
TT5orR0503_at	0.123703	0.0459	2.48007	-4.84091	0.470965	Thermus thermophilus HB8	TTHA0503
TT5orF4230_at	0.123703	0.0459	2.48006	-4.84092	0.501508	Thermus thermophilus HB8	TTHB230
TT5orR0816_at	0.123703	0.0459	2.47996	-4.84106	0.65144	Thermus thermophilus HB8	TTHA0816
TT5igR0174_at	0.123965	0.046	-2.47789	-4.84405	-0.689712	Thermus thermophilus HB8
TT5igF0313_at	0.124073	0.0461	2.47671	-4.84576	0.813234	Thermus thermophilus HB8
TT5orF4094_at	0.124516	0.0463	-2.47359	-4.85025	-0.459314	Thermus thermophilus HB8	TTHB094
TT5igR0312_at	0.124589	0.0463	2.47262	-4.85166	0.378436	Thermus thermophilus HB8
TT5orR0814_at	0.124598	0.0464	2.47162	-4.85309	0.528494	Thermus thermophilus HB8	TTHA0814
TT5igF0345_at	0.124598	0.0464	2.47145	-4.85333	1.03586	Thermus thermophilus HB8
TT5orF1347_at	0.125022	0.0466	2.46846	-4.85765	0.42471	Thermus thermophilus HB8	TTHA1347
TT5orR4020_at	0.125212	0.0467	-2.46682	-4.86002	-0.506726	Thermus thermophilus HB8	TTHB020
TT5orR0770_at	0.125413	0.0468	2.46512	-4.86247	0.401691	Thermus thermophilus HB8	TTHA0770
TT5orR0940_at	0.125687	0.047	-2.463	-4.86552	-0.560787	Thermus thermophilus HB8	TTHA0940
TT5orR0145_at	0.125691	0.047	2.46243	-4.86635	0.633585	Thermus thermophilus HB8	TTHA0145
TT5igF0062_at	0.126151	0.0472	-2.45925	-4.87093	-0.581705	Thermus thermophilus HB8	NA
TT5orR0558_at	0.126219	0.0473	-2.45782	-4.873	-0.571194	Thermus thermophilus HB8	TTHA0558
TT5orR0416_at	0.126219	0.0473	-2.45773	-4.87312	-0.442492	Thermus thermophilus HB8	TTHA0416
TT5igF0426_at	0.126219	0.0474	2.45722	-4.87386	2.2105	Thermus thermophilus HB8
TT5igR4008_at	0.126336	0.0474	-2.456	-4.87561	-0.804576	Thermus thermophilus HB8
TT5orR1815_at	0.12638	0.0475	-2.45496	-4.87712	-0.36036	Thermus thermophilus HB8	TTHA1815
TT5orF1218_at	0.12638	0.0475	2.45466	-4.87755	0.697483	Thermus thermophilus HB8	TTHA1218
TT5orF1318_at	0.126689	0.0477	2.45236	-4.88087	0.42341	Thermus thermophilus HB8	TTHA1318
TT5orR0800_at	0.126877	0.0478	-2.45075	-4.88319	-0.640366	Thermus thermophilus HB8	TTHA0800
TT5orF1007_at	0.127435	0.048	-2.44706	-4.88852	-0.498442	Thermus thermophilus HB8	TTHA1007
TT5orR0464_at	0.127653	0.0482	-2.44445	-4.89228	-0.470241	Thermus thermophilus HB8	TTHA0464
TT5orF0402_at	0.127653	0.0482	2.44422	-4.8926	0.715993	Thermus thermophilus HB8	TTHA0402
TT5orR1581_at	0.127653	0.0482	-2.4442	-4.89264	-0.537222	Thermus thermophilus HB8	TTHA1581
TT5igR6003_at	0.127713	0.0483	-2.44331	-4.89392	-0.90121	Thermus thermophilus HB8
TT5orF1245_at	0.127716	0.0483	2.44276	-4.89472	0.308125	Thermus thermophilus HB8	TTHA1245
TT5igR7005_at	0.128496	0.0486	-2.43784	-4.90181	-0.49411	Thermus thermophilus HB8
TT5igF0564_at	0.128765	0.0488	-2.43509	-4.90578	-1.46013	Thermus thermophilus HB8
TT5igR0104_at	0.128765	0.0488	2.43487	-4.90609	0.37891	Thermus thermophilus HB8
TT5orF0297_at	0.128765	0.0489	2.43392	-4.90747	0.468149	Thermus thermophilus HB8	TTHA0297
TT5igR0526_at	0.128765	0.0489	-2.43368	-4.90781	-0.449168	Thermus thermophilus HB8
TT5orR1236_at	0.128765	0.0489	2.43363	-4.90787	0.322969	Thermus thermophilus HB8	TTHA1236
TT5igF0042_at	0.129028	0.0491	2.43163	-4.91076	0.709047	Thermus thermophilus HB8	NA
TT5orR1531_at	0.130382	0.0496	2.42325	-4.92285	0.53751	Thermus thermophilus HB8	TTHA1531
TT5igF0518_at	0.130382	0.0497	-2.42307	-4.92311	-0.356075	Thermus thermophilus HB8
TT5orF1717_at	0.130436	0.0497	2.42182	-4.9249	0.426245	Thermus thermophilus HB8	TTHA1717
TT5orR1592_at	0.130436	0.0498	2.4217	-4.92509	0.370988	Thermus thermophilus HB8	TTHA1592
TT5orR1969_at	0.13051	0.0498	2.42075	-4.92645	0.489081	Thermus thermophilus HB8	TTHA1969
TT5orF1719_at	0.131355	0.0502	2.41559	-4.93388	0.410604	Thermus thermophilus HB8	TTHA1719
TT5orR1940_at	0.131679	0.0503	2.41329	-4.9372	0.521932	Thermus thermophilus HB8	TTHA1940
TT5orF0060_at	0.131679	0.0504	2.41276	-4.93798	0.570335	Thermus thermophilus HB8	TTHA0060
TT5igR0494_at	0.132394	0.0507	2.40834	-4.94434	1.35223	Thermus thermophilus HB8
TT5orR0950_at	0.132587	0.0508	-2.40676	-4.94661	-0.521491	Thermus thermophilus HB8	TTHA0950
TT5orR0976_at	0.132896	0.051	2.40456	-4.94979	0.40924	Thermus thermophilus HB8	TTHA0976
TT5orR1656_at	0.133069	0.0511	2.4031	-4.9519	0.348077	Thermus thermophilus HB8	TTHA1656
TT5igF0555_at	0.134247	0.0516	2.39572	-4.96253	0.483244	Thermus thermophilus HB8
TT5igR0217_at	0.134247	0.0516	2.39543	-4.96296	1.49082	Thermus thermophilus HB8
TT5orF7073_at	0.134247	0.0516	-2.39519	-4.9633	-1.42742	Thermus thermophilus HB8	TTHY7073
TT5orF0519_at	0.134319	0.0517	2.3938	-4.9653	0.447837	Thermus thermophilus HB8	TTHA0519
TT5orR0951_at	0.134319	0.0517	-2.39374	-4.96538	-0.420661	Thermus thermophilus HB8	TTHA0951
TT5igR0259_at	0.134339	0.0518	-2.3931	-4.9663	-0.421517	Thermus thermophilus HB8
TT5orF4226_at	0.134384	0.0518	2.39233	-4.96742	0.638344	Thermus thermophilus HB8	TTHB226
TT5igF0370_at	0.134607	0.052	2.39062	-4.96989	1.00745	Thermus thermophilus HB8
TT5orF0963_at	0.134916	0.0521	-2.38845	-4.97301	-0.885525	Thermus thermophilus HB8	TTHA0963
TT5orF1851_at	0.137159	0.053	2.37613	-4.99077	0.646364	Thermus thermophilus HB8	TTHA1851
TT5igF0241_at	0.137205	0.0531	2.37536	-4.99187	0.437184	Thermus thermophilus HB8
TT5orF0030_at	0.137355	0.0532	2.37405	-4.99376	0.400066	Thermus thermophilus HB8	TTHA0030
TT5orR1017_at	0.13784	0.0534	2.371	-4.99815	0.396389	Thermus thermophilus HB8	TTHA1017
TT5igR0072_at	0.138038	0.0535	-2.3693	-5.0006	-0.337907	Thermus thermophilus HB8
TT5orF7054_at	0.138038	0.0536	2.36853	-5.00171	1.65085	Thermus thermophilus HB8	TTHY7054
TT5orF0404_at	0.138038	0.0536	-2.3684	-5.0019	-0.3358	Thermus thermophilus HB8	TTHA0404
TT5orF4103_at	0.138185	0.0537	2.36711	-5.00376	0.411192	Thermus thermophilus HB8	TTHB103
TT5igF0268_at	0.138694	0.054	-2.36329	-5.00926	-0.620298	Thermus thermophilus HB8
TT5orR1712_at	0.138694	0.054	2.36316	-5.00944	0.444191	Thermus thermophilus HB8	TTHA1712
TT5orR0514_at	0.138694	0.054	-2.3629	-5.00982	-0.361648	Thermus thermophilus HB8	TTHA0514
TT5igF0406_at	0.138761	0.0541	2.36204	-5.01107	0.926716	Thermus thermophilus HB8
TT5igF0318_at	0.138786	0.0542	-2.36107	-5.01245	-0.31026	Thermus thermophilus HB8
TT5igR7031_at	0.138786	0.0542	-2.36008	-5.01388	-1.41047	Thermus thermophilus HB8
TT5igF0639_at	0.138786	0.0542	2.35982	-5.01425	0.523825	Thermus thermophilus HB8
TT5orF0410_at	0.138786	0.0543	-2.35981	-5.01427	-0.393655	Thermus thermophilus HB8	TTHA0410
TT5orF1283_at	0.138971	0.0544	2.35833	-5.0164	0.428828	Thermus thermophilus HB8	TTHA1283
TT5orF0368_at	0.139019	0.0545	2.35717	-5.01808	0.447313	Thermus thermophilus HB8	TTHA0368
TT5orR1124_at	0.139019	0.0545	-2.35705	-5.01825	-0.333886	Thermus thermophilus HB8	TTHA1124
TT5orF1519_at	0.139196	0.0546	2.35547	-5.02052	0.371097	Thermus thermophilus HB8	TTHA1519
TT5orR0591_at	0.139196	0.0546	-2.35509	-5.02106	-0.324986	Thermus thermophilus HB8	TTHA0591
TT5orR0067_at	0.13944	0.0547	-2.35332	-5.02361	-0.459989	Thermus thermophilus HB8	TTHA0067
TT5orF0774_at	0.140368	0.0552	-2.34807	-5.03118	-0.994849	Thermus thermophilus HB8	TTHA0774
TT5orR0170_at	0.140467	0.0552	2.34704	-5.03266	0.490277	Thermus thermophilus HB8	TTHA0170
TT5rrF0001_at	0.141007	0.0555	-2.34378	-5.03735	-0.544002	Thermus thermophilus HB8
TT5orF7048_at	0.142346	0.056	-2.33653	-5.0478	-0.929144	Thermus thermophilus HB8	TTHY7048
TT5orR0937_at	0.142738	0.0563	2.33378	-5.05175	0.336314	Thermus thermophilus HB8	TTHA0937
TT5orR1535_at	0.142738	0.0563	-2.33352	-5.05211	-0.538162	Thermus thermophilus HB8	TTHA1535
TT5orR1033_at	0.143121	0.0565	2.3311	-5.05561	0.579704	Thermus thermophilus HB8	TTHA1033
TT5orF0231_at	0.143189	0.0565	2.33024	-5.05684	0.377995	Thermus thermophilus HB8	TTHA0231
TT5igR0650_at	0.14375	0.0568	2.32694	-5.06159	0.455265	Thermus thermophilus HB8
TT5igF0332_at	0.143774	0.0569	-2.3263	-5.06251	-0.43326	Thermus thermophilus HB8
TT5orF0310_at	0.143787	0.0569	2.32552	-5.06363	0.58166	Thermus thermophilus HB8	TTHA0310
TT5orF1452_at	0.143787	0.057	-2.32483	-5.06463	-0.542489	Thermus thermophilus HB8	TTHA1452
TT5igF0251_at	0.143787	0.057	-2.32469	-5.06483	-1.13991	Thermus thermophilus HB8
AFFX-LysX-3_at	0.143833	0.057	2.32395	-5.0659	2.35448	B. subtilis	NA
TT5igF0320_at	0.143911	0.0571	-2.32304	-5.0672	-0.521433	Thermus thermophilus HB8
TT5orR1774_at	0.144446	0.0574	-2.31989	-5.07174	-0.312728	Thermus thermophilus HB8	TTHA1774
TT5igF0330_at	0.144872	0.0576	2.31728	-5.0755	0.780182	Thermus thermophilus HB8
TT5orR0398_at	0.145742	0.058	-2.3125	-5.08237	-0.3566	Thermus thermophilus HB8	TTHA0398
TT5orR1521_at	0.146111	0.0582	2.31018	-5.0857	0.520781	Thermus thermophilus HB8	TTHA1521
TT5orF1115_at	0.146156	0.0582	-2.30945	-5.08675	-0.334282	Thermus thermophilus HB8	TTHA1115
TT5orR0888_at	0.146203	0.0583	-2.30871	-5.08782	-0.44221	Thermus thermophilus HB8	TTHA0888
TT5orF1705_at	0.146276	0.0584	2.30771	-5.08925	0.542238	Thermus thermophilus HB8	TTHA1705
TT5igR0793_at	0.146276	0.0584	-2.30733	-5.0898	-0.83404	Thermus thermophilus HB8
TT5igR4044_at	0.146527	0.0585	2.3056	-5.09229	0.791205	Thermus thermophilus HB8
TT5orR1436_at	0.146622	0.0586	-2.30463	-5.09369	-0.368649	Thermus thermophilus HB8	TTHA1436
TT5igR0498_at	0.146693	0.0587	2.30377	-5.09491	0.707397	Thermus thermophilus HB8
TT5igR4003_at	0.146783	0.0588	2.30283	-5.09628	0.511319	Thermus thermophilus HB8
TT5orF4049_at	0.146905	0.0589	2.30172	-5.09786	0.593267	Thermus thermophilus HB8	TTHB049
TT5orF0361_at	0.146936	0.0589	-2.30107	-5.0988	-0.570119	Thermus thermophilus HB8	TTHA0361
TT5igR0192_at	0.146969	0.059	2.3004	-5.09976	0.476795	Thermus thermophilus HB8
TT5orF1371_at	0.147393	0.0592	2.29784	-5.10345	0.473243	Thermus thermophilus HB8	TTHA1371
TT5orR0309_at	0.148017	0.0595	2.29388	-5.10914	0.365484	Thermus thermophilus HB8	TTHA0309
TT5orF1028_at	0.148017	0.0595	-2.2938	-5.10925	-0.479759	Thermus thermophilus HB8	TTHA1028
TT5orR1242_at	0.148017	0.0596	2.29331	-5.10996	0.442242	Thermus thermophilus HB8	TTHA1242
TT5igF0112_at	0.148115	0.0596	-2.29233	-5.11136	-0.752361	Thermus thermophilus HB8
TT5igR0788_at	0.14856	0.0599	2.28923	-5.11583	0.464536	Thermus thermophilus HB8
TT5orR0669_at	0.14856	0.0599	-2.28918	-5.11589	-0.799744	Thermus thermophilus HB8	TTHA0669
TT5orR0537_at	0.148664	0.06	-2.28818	-5.11733	-0.414851	Thermus thermophilus HB8	TTHA0537
TT5orF1108_at	0.149428	0.0603	2.28403	-5.1233	0.34259	Thermus thermophilus HB8	TTHA1108
TT5igR0651_at	0.150393	0.0608	2.27895	-5.1306	0.452176	Thermus thermophilus HB8
TT5orR0741_at	0.15162	0.0613	-2.27232	-5.14012	-0.475693	Thermus thermophilus HB8	TTHA0741
TT5orF1079_at	0.15162	0.0614	-2.27216	-5.14035	-0.293614	Thermus thermophilus HB8	TTHA1079
TT5igR0143_at	0.151771	0.0615	2.27069	-5.14246	0.66529	Thermus thermophilus HB8
TT5igR0511_at	0.151771	0.0615	2.27045	-5.14281	0.549706	Thermus thermophilus HB8
TT5orF4034_at	0.151837	0.0616	2.26945	-5.14424	0.481121	Thermus thermophilus HB8	TTHB034
TT5orF0895_at	0.151837	0.0616	2.26873	-5.14527	0.459766	Thermus thermophilus HB8	TTHA0895
TT5orR0317_at	0.151837	0.0617	2.26863	-5.14542	0.712118	Thermus thermophilus HB8	TTHA0317
TT5orR0644_at	0.151854	0.0617	-2.2677	-5.14676	-0.388014	Thermus thermophilus HB8	TTHA0644
TT5igF4083_at	0.151854	0.0618	-2.26755	-5.14697	-0.647607	Thermus thermophilus HB8
TT5igR0633_at	0.152333	0.062	2.26481	-5.15091	0.476036	Thermus thermophilus HB8
TT5igR0455_at	0.152401	0.0621	2.26399	-5.15208	0.537746	Thermus thermophilus HB8
TT5igR0229_at	0.152607	0.0622	2.26253	-5.15418	0.515729	Thermus thermophilus HB8
TT5orR4113_at	0.152617	0.0622	2.26199	-5.15496	0.386794	Thermus thermophilus HB8	TTHB113
TT5orF6013_at	0.153018	0.0624	-2.25962	-5.15835	-0.426656	Thermus thermophilus HB8	TTHC013
TT5orF0380_at	0.153237	0.0626	2.25811	-5.16053	0.454404	Thermus thermophilus HB8	TTHA0380
TT5orR0715_at	0.153899	0.063	2.25383	-5.16666	0.416357	Thermus thermophilus HB8	TTHA0715
TT5orR1902_at	0.153899	0.063	2.25369	-5.16686	0.327178	Thermus thermophilus HB8	TTHA1902
TT5orF1912_at	0.153899	0.063	2.25355	-5.16707	0.35258	Thermus thermophilus HB8	TTHA1912
TT5orF7071_at	0.154282	0.0632	-2.25128	-5.17032	-1.87738	Thermus thermophilus HB8	TTHY7071
TT5orR0984_at	0.154622	0.0634	-2.24892	-5.1737	-0.500996	Thermus thermophilus HB8	TTHA0984
TT5igR0787_at	0.154622	0.0634	2.24873	-5.17398	0.423341	Thermus thermophilus HB8
TT5orF0907_at	0.154791	0.0635	2.24746	-5.17581	0.463703	Thermus thermophilus HB8	TTHA0907
TT5igR0085_at	0.154938	0.0636	-2.24614	-5.1777	-0.733495	Thermus thermophilus HB8
TT5orF7064_at	0.154938	0.0637	-2.24494	-5.17942	-1.17736	Thermus thermophilus HB8	TTHY7064
TT5orR0256_at	0.154938	0.0638	-2.24477	-5.17966	-0.404112	Thermus thermophilus HB8	TTHA0256
TT5orR0293_at	0.154938	0.0638	-2.24444	-5.18014	-0.42872	Thermus thermophilus HB8	TTHA0293
TT5orF1030_at	0.154938	0.0638	2.24431	-5.18033	0.588148	Thermus thermophilus HB8	TTHA1030
TT5orF0043_at	0.155857	0.0642	2.23961	-5.18706	0.44316	Thermus thermophilus HB8	TTHA0043
TT5orR0550_at	0.155893	0.0643	2.23859	-5.18852	0.328282	Thermus thermophilus HB8	TTHA0550
TT5igR0397_at	0.155893	0.0643	-2.23846	-5.18871	-2.78089	Thermus thermophilus HB8
TT5orR0712_at	0.15625	0.0645	-2.23635	-5.19174	-0.452443	Thermus thermophilus HB8	TTHA0712
TT5orF4058_at	0.156434	0.0646	-2.23502	-5.19365	-0.809592	Thermus thermophilus HB8	TTHB058
TT5orR0337_at	0.156577	0.0647	2.23388	-5.19528	0.392073	Thermus thermophilus HB8	TTHA0337
TT5igR4058_at	0.157119	0.065	-2.23093	-5.19951	-0.532339	Thermus thermophilus HB8
TT5orR0204_at	0.157371	0.0652	-2.2293	-5.20185	-0.357243	Thermus thermophilus HB8	TTHA0204
TT5orF0366_at	0.157561	0.0653	-2.22795	-5.20378	-0.331935	Thermus thermophilus HB8	TTHA0366
TT5igR0056_at	0.157917	0.0655	2.22586	-5.20677	0.409027	Thermus thermophilus HB8
TT5orR1243_at	0.158275	0.0657	2.22376	-5.20978	0.302892	Thermus thermophilus HB8	TTHA1243
TT5orR4092_at	0.158593	0.0659	-2.22185	-5.21252	-0.577462	Thermus thermophilus HB8	TTHB092
TT5orR1918_at	0.158921	0.066	-2.21989	-5.21532	-1.27005	Thermus thermophilus HB8	TTHA1918
TT5orF0199_at	0.159688	0.0664	2.21561	-5.22145	0.316664	Thermus thermophilus HB8	TTHA0199
TT5orR1226_at	0.159688	0.0664	2.2155	-5.22162	0.448905	Thermus thermophilus HB8	TTHA1226
TT5orR0228_at	0.159928	0.0666	-2.21394	-5.22385	-0.351338	Thermus thermophilus HB8	TTHA0228
TT5orR0283_at	0.160442	0.0669	2.21118	-5.22781	0.473936	Thermus thermophilus HB8	TTHA0283
TT5igR0660_at	0.160816	0.0671	-2.20904	-5.23087	-0.383661	Thermus thermophilus HB8
TT5orR4012_at	0.160944	0.0672	-2.20799	-5.23238	-0.36787	Thermus thermophilus HB8	TTHB012
TT5orR4195_at	0.160957	0.0672	2.20744	-5.23316	0.318871	Thermus thermophilus HB8	TTHB195
TT5orF4107_at	0.16133	0.0674	-2.20495	-5.23673	-0.429632	Thermus thermophilus HB8	TTHB107
TT5igR0790_at	0.16133	0.0675	2.20466	-5.23715	0.393576	Thermus thermophilus HB8
TT5orF0930_at	0.16133	0.0675	-2.20434	-5.23759	-0.30959	Thermus thermophilus HB8	TTHA0930
TT5orF7029_at	0.161766	0.0677	-2.20194	-5.24103	-1.32704	Thermus thermophilus HB8	TTHY7029
TT5orF0440_at	0.162161	0.068	-2.19929	-5.24482	-0.696219	Thermus thermophilus HB8	TTHA0440
TT5igR0457_at	0.162161	0.068	-2.19924	-5.2449	-0.786372	Thermus thermophilus HB8
TT5orF1025_at	0.162234	0.0681	-2.19797	-5.24672	-1.03427	Thermus thermophilus HB8	TTHA1025
TT5orR7091_at	0.163276	0.0686	-2.19265	-5.25433	-1.38614	Thermus thermophilus HB8	TTHY7091
TT5orF0776_at	0.163276	0.0686	2.19245	-5.25462	0.600955	Thermus thermophilus HB8	TTHA0776
TT5orF0219_at	0.164079	0.069	2.18849	-5.26028	0.510652	Thermus thermophilus HB8	TTHA0219
TT5igF0437_at	0.165067	0.0695	2.18375	-5.26706	0.85164	Thermus thermophilus HB8
TT5orF1757_at	0.166222	0.07	2.17832	-5.27481	0.433731	Thermus thermophilus HB8	TTHA1757
TT5orR1497_at	0.166822	0.0703	2.17529	-5.27915	0.316128	Thermus thermophilus HB8	TTHA1497
TT5igR0597_at	0.167429	0.0706	-2.17224	-5.28351	-3.18377	Thermus thermophilus HB8
TT5orR1634_at	0.167529	0.0707	-2.17133	-5.28481	-0.392396	Thermus thermophilus HB8	TTHA1634
TT5orF4162_at	0.16753	0.0708	2.17085	-5.2855	0.670295	Thermus thermophilus HB8	TTHB162
TT5igF6001_at	0.168597	0.0713	2.16587	-5.29261	0.864568	Thermus thermophilus HB8
TT5orR1038_at	0.168614	0.0713	2.16532	-5.2934	0.374566	Thermus thermophilus HB8	TTHA1038
TT5igF0172_at	0.168993	0.0715	-2.1631	-5.29657	-0.515862	Thermus thermophilus HB8
TT5orF0810_at	0.168993	0.0716	2.16277	-5.29704	0.350982	Thermus thermophilus HB8	TTHA0810
TT5igR0314_at	0.169459	0.0718	-2.16034	-5.30051	-0.861601	Thermus thermophilus HB8
TT5orF1510_at	0.169698	0.072	-2.15886	-5.30262	-0.384835	Thermus thermophilus HB8	TTHA1510
TT5orF0750_at	0.169815	0.0721	-2.15789	-5.304	-0.558975	Thermus thermophilus HB8	TTHA0750
TT5orF1425_at	0.170217	0.0723	2.15574	-5.30707	0.37193	Thermus thermophilus HB8	TTHA1425
TT5orR4233_at	0.170232	0.0724	2.15468	-5.30858	0.34477	Thermus thermophilus HB8	TTHB233
TT5orR4114_at	0.170232	0.0724	2.15438	-5.30902	0.537363	Thermus thermophilus HB8	TTHB114
TT5igF0507_at	0.170232	0.0724	-2.15425	-5.3092	-0.654066	Thermus thermophilus HB8
TT5igR0213_at	0.170664	0.0727	-2.15198	-5.31244	-1.81688	Thermus thermophilus HB8
TT5orR0920_at	0.170868	0.0728	2.15065	-5.31433	1.91135	Thermus thermophilus HB8	TTHA0920
TT5orR1060_at	0.170893	0.0729	-2.15007	-5.31516	-0.426733	Thermus thermophilus HB8	TTHA1060
TT5orR0970_at	0.171013	0.073	-2.14895	-5.31677	-0.660999	Thermus thermophilus HB8	TTHA0970
TT5orR1507_at	0.171013	0.073	2.14863	-5.31722	0.304479	Thermus thermophilus HB8	TTHA1507
TT5igF0004_at	0.171393	0.0732	-2.14658	-5.32014	-1.47161	Thermus thermophilus HB8	NA
TT5orF0160_at	0.171625	0.0734	2.14515	-5.32219	0.469952	Thermus thermophilus HB8	TTHA0160
TT5igR0306_at	0.172061	0.0736	-2.14288	-5.32542	-1.1862	Thermus thermophilus HB8
TT5igR0421_at	0.174099	0.0745	-2.13406	-5.33799	-0.428063	Thermus thermophilus HB8
TT5orF0429_at	0.17427	0.0747	2.13289	-5.33965	0.383625	Thermus thermophilus HB8	TTHA0429
TT5igR0648_at	0.174565	0.0749	-2.13077	-5.34267	-0.584185	Thermus thermophilus HB8
TT5orF1732_at	0.174565	0.0749	2.13075	-5.3427	0.387769	Thermus thermophilus HB8	TTHA1732
TT5orF1492_at	0.175206	0.0752	2.12769	-5.34707	0.404701	Thermus thermophilus HB8	TTHA1492
TT5orF0011_at	0.175551	0.0754	-2.12582	-5.34973	-0.298417	Thermus thermophilus HB8	TTHA0011
TT5orR4172_at	0.175787	0.0756	2.1244	-5.35175	0.657878	Thermus thermophilus HB8	TTHB172
TT5orR1645_at	0.175975	0.0757	-2.12317	-5.3535	-0.620798	Thermus thermophilus HB8	TTHA1645
TT5orR1646_at	0.17611	0.0758	2.12216	-5.35495	0.339591	Thermus thermophilus HB8	TTHA1646
TT5orR4021_at	0.176246	0.0759	-2.12114	-5.3564	-0.384833	Thermus thermophilus HB8	TTHB021
TT5orF1189_at	0.178498	0.0769	-2.11168	-5.36985	-0.477226	Thermus thermophilus HB8	TTHA1189
TT5orR1350_at	0.178576	0.077	-2.11091	-5.37096	-0.324016	Thermus thermophilus HB8	TTHA1350
TT5orR1777_at	0.178741	0.0772	2.10937	-5.37314	0.366104	Thermus thermophilus HB8	TTHA1777
TT5orF1058_at	0.178741	0.0772	2.10881	-5.37395	0.287519	Thermus thermophilus HB8	TTHA1058
TT5orR1809_at	0.178741	0.0773	2.10825	-5.37474	0.385931	Thermus thermophilus HB8	TTHA1809
TT5orF0469_at	0.178741	0.0774	-2.10749	-5.37582	-0.335017	Thermus thermophilus HB8	TTHA0469
TT5orF1849_at	0.178741	0.0774	2.10748	-5.37584	0.598824	Thermus thermophilus HB8	TTHA1849
TT5igF0367_at	0.178741	0.0774	-2.10744	-5.37589	-2.19611	Thermus thermophilus HB8
TT5orR1372_at	0.178859	0.0775	2.1065	-5.37722	0.449478	Thermus thermophilus HB8	TTHA1372
TT5orF0037_at	0.17939	0.0778	-2.10384	-5.38101	-0.517731	Thermus thermophilus HB8	TTHA0037
TT5igR0768_at	0.17939	0.0778	-2.10347	-5.38153	-0.357908	Thermus thermophilus HB8
TT5orF1803_at	0.179651	0.078	-2.10197	-5.38366	-0.394315	Thermus thermophilus HB8	TTHA1803
TT5orR1740_at	0.179813	0.0782	-2.10038	-5.38593	-0.372732	Thermus thermophilus HB8	TTHA1740
TT5orR0653_at	0.179813	0.0782	2.10008	-5.38635	0.486927	Thermus thermophilus HB8	TTHA0653
TT5igR4069_at	0.179813	0.0782	-2.09994	-5.38656	-1.89911	Thermus thermophilus HB8
TT5orR1932_at	0.180475	0.0786	2.09643	-5.39154	0.367448	Thermus thermophilus HB8	TTHA1932
TT5orF1794_at	0.180475	0.0786	2.09641	-5.39157	0.375543	Thermus thermophilus HB8	TTHA1794
TT5igR0593_at	0.180502	0.0787	-2.09584	-5.39238	-0.516793	Thermus thermophilus HB8
TT5orR1886_at	0.180946	0.0789	2.09363	-5.39551	0.354142	Thermus thermophilus HB8	TTHA1886
TT5orF1722_at	0.182334	0.0796	2.08741	-5.40435	0.578411	Thermus thermophilus HB8	TTHA1722
TT5igR0187_at	0.182334	0.0796	-2.0873	-5.4045	-0.390566	Thermus thermophilus HB8
TT5igR0536_at	0.183113	0.0801	2.08353	-5.40986	0.409513	Thermus thermophilus HB8
TT5orR1307_at	0.183113	0.0801	-2.08336	-5.4101	-0.299411	Thermus thermophilus HB8	TTHA1307
AFFX-r2-P1-cre-5_at	0.183115	0.0802	-2.0822	-5.41175	-0.457844	Bacteriophage P1	NA
TT5orR1569_at	0.183115	0.0802	-2.08219	-5.41176	-0.273278	Thermus thermophilus HB8	TTHA1569
TT5igR0469_at	0.183115	0.0802	-2.08196	-5.41208	-0.526504	Thermus thermophilus HB8
TT5orR1972_at	0.18371	0.0806	-2.07885	-5.4165	-0.2809	Thermus thermophilus HB8	TTHA1972
TT5igF0527_at	0.18371	0.0806	-2.07874	-5.41665	-0.588538	Thermus thermophilus HB8
TT5orR1971_at	0.183949	0.0808	-2.07737	-5.41861	-0.392114	Thermus thermophilus HB8	TTHA1971
TT5orF1191_at	0.184665	0.0812	-2.07377	-5.42371	-0.337449	Thermus thermophilus HB8	TTHA1191
TT5orF0140_at	0.184665	0.0812	2.07369	-5.42382	0.543729	Thermus thermophilus HB8	TTHA0140
TT5orR0759_at	0.184954	0.0814	-2.07213	-5.42603	-0.504246	Thermus thermophilus HB8	TTHA0759
TT5orR0736_at	0.185053	0.0815	2.07129	-5.42723	0.416799	Thermus thermophilus HB8	TTHA0736
TT5orF0392_at	0.185237	0.0816	2.07013	-5.42887	0.342737	Thermus thermophilus HB8	TTHA0392
TT5orR4115_at	0.185314	0.0817	2.06897	-5.43051	0.344758	Thermus thermophilus HB8	TTHB115
TT5orF0305_at	0.185314	0.0818	-2.06847	-5.43122	-0.273612	Thermus thermophilus HB8	TTHA0305
TT5orF0749_at	0.185314	0.0818	-2.06846	-5.43124	-1.76804	Thermus thermophilus HB8	TTHA0749
TT5igF0334_at	0.18537	0.0819	2.06751	-5.43258	0.435396	Thermus thermophilus HB8
TT5igF0063_at	0.18537	0.0819	2.06732	-5.43285	0.625169	Thermus thermophilus HB8	NA
TT5orR4247_at	0.185373	0.082	2.06685	-5.43351	0.433797	Thermus thermophilus HB8	TTHB247
TT5igR0107_at	0.185788	0.0822	-2.06466	-5.43662	-0.679235	Thermus thermophilus HB8
TT5igR0001_at	0.185788	0.0823	-2.06436	-5.43705	-0.500362	Thermus thermophilus HB8
TT5igF6009_at	0.186154	0.0825	-2.06251	-5.43967	-0.352469	Thermus thermophilus HB8
TT5igF0126_at	0.186965	0.0829	2.0587	-5.44506	0.752332	Thermus thermophilus HB8
TT5igF0506_at	0.186965	0.083	2.05815	-5.44584	0.45478	Thermus thermophilus HB8
TT5orR0815_at	0.186965	0.083	2.05807	-5.44596	0.42025	Thermus thermophilus HB8	TTHA0815
TT5igF0424_at	0.187343	0.0832	2.05618	-5.44863	0.582783	Thermus thermophilus HB8
TT5orF0075_at	0.187382	0.0833	-2.05558	-5.44948	-0.412288	Thermus thermophilus HB8	TTHA0075
TT5orF0564_at	0.187547	0.0834	2.05434	-5.45124	0.348735	Thermus thermophilus HB8	TTHA0564
TT5igR0595_at	0.187547	0.0835	2.05364	-5.45223	1.2343	Thermus thermophilus HB8
TT5igR0033_at	0.187547	0.0835	-2.05359	-5.4523	-0.752894	Thermus thermophilus HB8
TT5orR1550_at	0.189387	0.0844	-2.04624	-5.46271	-0.491617	Thermus thermophilus HB8	TTHA1550
TT5orR0709_at	0.190868	0.0851	-2.04027	-5.47114	-0.310842	Thermus thermophilus HB8	TTHA0709
TT5igR0124_at	0.191102	0.0853	2.03895	-5.473	0.4679	Thermus thermophilus HB8
TT5orF1221_at	0.191886	0.0857	-2.03561	-5.47773	-0.358429	Thermus thermophilus HB8	TTHA1221
TT5orR0780_at	0.192312	0.0859	2.03349	-5.48072	0.40183	Thermus thermophilus HB8	TTHA0780
TT5orR0322_at	0.192312	0.086	2.03313	-5.48123	0.36911	Thermus thermophilus HB8	TTHA0322
TT5orR0415_at	0.192657	0.0862	-2.03141	-5.48366	-0.277799	Thermus thermophilus HB8	TTHA0415
TT5orF0594_at	0.192731	0.0863	2.03069	-5.48468	0.572894	Thermus thermophilus HB8	TTHA0594
TT5igF0153_at	0.192851	0.0864	2.02935	-5.48657	2.34538	Thermus thermophilus HB8
TT5orR0211_at	0.192851	0.0864	-2.02935	-5.48658	-0.383988	Thermus thermophilus HB8	TTHA0211
TT5orF1056_at	0.193564	0.0868	-2.02629	-5.4909	-0.282603	Thermus thermophilus HB8	TTHA1056
TT5orF7070_at	0.193932	0.087	2.02449	-5.49343	1.06554	Thermus thermophilus HB8	TTHY7070
TT5orF0765_at	0.19412	0.0872	2.02336	-5.49504	0.590225	Thermus thermophilus HB8	TTHA0765
TT5orF4213_at	0.194153	0.0872	2.02279	-5.49584	0.746238	Thermus thermophilus HB8	TTHB213
TT5orR0924_at	0.195034	0.0877	-2.01914	-5.50099	-0.47055	Thermus thermophilus HB8	TTHA0924
TT5orR1297_at	0.195278	0.0879	2.0178	-5.50287	0.304464	Thermus thermophilus HB8	TTHA1297
TT5orR0349_at	0.195807	0.0882	2.0153	-5.5064	0.553796	Thermus thermophilus HB8	TTHA0349
TT5orR0728_at	0.195807	0.0882	-2.01499	-5.50684	-0.79745	Thermus thermophilus HB8	TTHA0728
TT5igR0089_at	0.195949	0.0883	2.01403	-5.50819	0.521327	Thermus thermophilus HB8
TT5igR0098_at	0.197446	0.0891	-2.0082	-5.51641	-1.08418	Thermus thermophilus HB8
TT5igF0068_at	0.199102	0.0899	-2.00185	-5.52535	-0.856775	Thermus thermophilus HB8	NA
TT5orR0501_at	0.200167	0.0905	-1.9972	-5.5319	-0.337988	Thermus thermophilus HB8	TTHA0501
TT5igR0357_at	0.200167	0.0905	1.99694	-5.53227	0.512957	Thermus thermophilus HB8
TT5orF0181_at	0.200167	0.0906	-1.99634	-5.53311	-0.322279	Thermus thermophilus HB8	TTHA0181
TT5igF0140_at	0.200167	0.0906	-1.99598	-5.53362	-0.287343	Thermus thermophilus HB8
TT5orR0737_at	0.200167	0.0906	1.99584	-5.53381	0.478827	Thermus thermophilus HB8	TTHA0737
TT5orR1162_at	0.200439	0.0908	1.99444	-5.53579	0.344496	Thermus thermophilus HB8	TTHA1162
TT5igR7034_at	0.200903	0.0911	-1.99235	-5.53872	-1.96019	Thermus thermophilus HB8
TT5orF1164_at	0.202055	0.0917	1.98787	-5.54503	0.334395	Thermus thermophilus HB8	TTHA1164
TT5orR0744_at	0.20207	0.0917	-1.98737	-5.54573	-0.367201	Thermus thermophilus HB8	TTHA0744
TT5igR0054_at	0.20214	0.0919	1.98606	-5.54758	0.947067	Thermus thermophilus HB8
TT5orF1374_at	0.20214	0.0919	-1.98583	-5.54789	-0.319022	Thermus thermophilus HB8	TTHA1374
TT5orR1923_at	0.20214	0.0919	1.98579	-5.54795	0.310152	Thermus thermophilus HB8	TTHA1923
TT5orF7007_at	0.202465	0.0921	-1.98421	-5.55017	-0.718596	Thermus thermophilus HB8	TTHY7007
TT5igF0531_at	0.20287	0.0924	-1.98235	-5.55278	-0.416279	Thermus thermophilus HB8
TT5orF7021_at	0.203249	0.0926	-1.98059	-5.55526	-0.793425	Thermus thermophilus HB8	TTHY7021
TT5orR0468_at	0.203335	0.0927	1.97985	-5.5563	0.317039	Thermus thermophilus HB8	TTHA0468
TT5orF0193_at	0.20362	0.0929	1.97841	-5.55832	0.334748	Thermus thermophilus HB8	TTHA0193
TT5orF0328_at	0.204341	0.0933	1.97547	-5.56245	0.394429	Thermus thermophilus HB8	TTHA0328
TT5orR4223_at	0.204882	0.0936	1.97293	-5.56601	0.633706	Thermus thermophilus HB8	TTHB223
TT5igF0286_at	0.204882	0.0936	1.97272	-5.56631	0.331565	Thermus thermophilus HB8
TT5igR4034_at	0.205159	0.0938	-1.97132	-5.56828	-0.479234	Thermus thermophilus HB8
TT5orF4093_at	0.20553	0.0941	1.9696	-5.57069	0.300274	Thermus thermophilus HB8	TTHB093
TT5orF1586_at	0.205736	0.0942	1.96845	-5.5723	0.363677	Thermus thermophilus HB8	TTHA1586
TT5igR0353_at	0.208205	0.0954	1.95955	-5.58478	0.424545	Thermus thermophilus HB8
TT5orF0597_at	0.208205	0.0955	-1.95913	-5.58536	-0.36145	Thermus thermophilus HB8	TTHA0597
TT5orR4023_at	0.209116	0.096	-1.95538	-5.59062	-0.489847	Thermus thermophilus HB8	TTHB023
TT5igF4032_at	0.209116	0.096	-1.95517	-5.59092	-1.02781	Thermus thermophilus HB8
TT5orR0826_at	0.209509	0.0962	-1.9534	-5.59339	-0.289708	Thermus thermophilus HB8	TTHA0826
TT5igR0530_at	0.209878	0.0965	-1.95172	-5.59575	-0.407556	Thermus thermophilus HB8
TT5igF0219_at	0.210277	0.0967	1.94993	-5.59825	0.496777	Thermus thermophilus HB8
TT5igF0610_at	0.210472	0.0969	-1.9488	-5.59984	-0.735535	Thermus thermophilus HB8
TT5igF0257_at	0.210472	0.097	1.94806	-5.60086	0.473385	Thermus thermophilus HB8
TT5orR0323_at	0.210472	0.097	1.94767	-5.60142	0.542828	Thermus thermophilus HB8	TTHA0323
TT5orR1286_at	0.210472	0.097	1.94752	-5.60162	0.503005	Thermus thermophilus HB8	TTHA1286
TT5igR0335_at	0.210481	0.0971	1.94681	-5.60262	1.72017	Thermus thermophilus HB8
TT5igR0510_at	0.210481	0.0972	1.94661	-5.60289	0.579899	Thermus thermophilus HB8
TT5orF1190_at	0.210841	0.0974	-1.94459	-5.60573	-0.410207	Thermus thermophilus HB8	TTHA1190
AFFX-LysX-M_at	0.210841	0.0975	1.94453	-5.60581	0.779543	B. subtilis	NA
TT5igR0724_at	0.212693	0.0984	1.93791	-5.61506	0.582721	Thermus thermophilus HB8
TT5igR0509_at	0.213188	0.0987	1.93583	-5.61797	0.710314	Thermus thermophilus HB8
TT5orF0298_at	0.213718	0.099	1.93362	-5.62106	0.331544	Thermus thermophilus HB8	TTHA0298
TT5igF0421_at	0.213718	0.099	1.9332	-5.62164	3.19383	Thermus thermophilus HB8
TT5orF1360_at	0.213721	0.0991	1.93275	-5.62227	0.406978	Thermus thermophilus HB8	TTHA1360
TT5orR1574_at	0.213753	0.0992	-1.93221	-5.62303	-0.493936	Thermus thermophilus HB8	TTHA1574
TT5orR4067_at	0.214181	0.0994	1.93036	-5.62561	0.655524	Thermus thermophilus HB8	TTHB067
TT5orF0384_at	0.214636	0.0997	-1.92841	-5.62833	-0.259427	Thermus thermophilus HB8	TTHA0384
TT5orF7013_at	0.214636	0.0998	-1.92799	-5.62892	-1.54534	Thermus thermophilus HB8	TTHY7013
TT5igR6002_at	0.21479	0.0999	-1.92663	-5.63081	-0.282685	Thermus thermophilus HB8
TT5orF1953_at	0.21479	0.1	1.92661	-5.63084	0.316994	Thermus thermophilus HB8	TTHA1953
TT5orF0195_at	0.215228	0.1	-1.92453	-5.63375	-0.440895	Thermus thermophilus HB8	TTHA0195
TT5igF0160_at	0.215228	0.1	-1.9243	-5.63406	-1.97773	Thermus thermophilus HB8
TT5orF0432_at	0.215349	0.1	1.92347	-5.63523	0.315477	Thermus thermophilus HB8	TTHA0432
TT5igF0457_at	0.216112	0.101	-1.92054	-5.63932	-0.380305	Thermus thermophilus HB8
TT5igR0278_at	0.216186	0.101	1.9198	-5.64034	0.985588	Thermus thermophilus HB8
TT5orF0121_at	0.216186	0.101	1.91943	-5.64086	0.562133	Thermus thermophilus HB8	TTHA0121
TT5orR1046_at	0.216277	0.101	1.91869	-5.64189	0.336253	Thermus thermophilus HB8	TTHA1046
TT5igR0795_at	0.216303	0.101	-1.91805	-5.64278	-0.590861	Thermus thermophilus HB8
TT5igF0220_at	0.216303	0.101	-1.91775	-5.64321	-0.403419	Thermus thermophilus HB8
TT5orR1943_at	0.216366	0.101	1.9171	-5.6441	0.400943	Thermus thermophilus HB8	TTHA1943
TT5orF0572_at	0.217318	0.102	1.91357	-5.64903	0.436113	Thermus thermophilus HB8	TTHA0572
TT5orF0997_at	0.21756	0.102	1.91235	-5.65072	1.40785	Thermus thermophilus HB8	TTHA0997
TT5igR0139_at	0.217663	0.102	1.91159	-5.65179	0.627946	Thermus thermophilus HB8
TT5igR0490_at	0.217936	0.102	1.91027	-5.65363	0.443963	Thermus thermophilus HB8
TT5orF4077_at	0.217946	0.102	-1.9098	-5.65427	-0.470863	Thermus thermophilus HB8	TTHB077
TT5orR0127_at	0.219032	0.103	1.90586	-5.65976	0.337421	Thermus thermophilus HB8	TTHA0127
TT5orR0179_at	0.219426	0.103	1.90416	-5.66213	0.31638	Thermus thermophilus HB8	TTHA0179
TT5igF4005_at	0.220342	0.104	1.90064	-5.66703	0.55629	Thermus thermophilus HB8
TT5orF1330_at	0.220342	0.104	-1.90035	-5.66743	-0.37809	Thermus thermophilus HB8	TTHA1330
TT5orR0874_at	0.220415	0.104	-1.89969	-5.66835	-0.452148	Thermus thermophilus HB8	TTHA0874
TT5orR0417_at	0.221126	0.104	-1.89698	-5.67211	-0.291375	Thermus thermophilus HB8	TTHA0417
TT5orR1123_at	0.221152	0.104	-1.8964	-5.67292	-0.261526	Thermus thermophilus HB8	TTHA1123
TT5orR1934_at	0.221152	0.104	-1.89604	-5.67342	-0.338901	Thermus thermophilus HB8	TTHA1934
TT5orR0435_at	0.222179	0.105	-1.89233	-5.67857	-0.271005	Thermus thermophilus HB8	TTHA0435
TT5igR0393_at	0.222309	0.105	1.8912	-5.68014	0.565186	Thermus thermophilus HB8
TT5orR0673_at	0.222309	0.105	1.89106	-5.68033	0.355876	Thermus thermophilus HB8	TTHA0673
TT5igR7064_at	0.222331	0.105	-1.89056	-5.68102	-1.61611	Thermus thermophilus HB8
TT5orF0069_at	0.222693	0.105	1.88899	-5.68322	0.343922	Thermus thermophilus HB8	TTHA0069
TT5orR1041_at	0.222732	0.105	-1.88843	-5.68398	-0.405252	Thermus thermophilus HB8	TTHA1041
TT5orF0260_at	0.22275	0.106	-1.88753	-5.68523	-0.42522	Thermus thermophilus HB8	TTHA0260
TT5orF1080_at	0.22275	0.106	1.8873	-5.68555	0.370165	Thermus thermophilus HB8	TTHA1080
TT5orR4146_at	0.22275	0.106	-1.8871	-5.68584	-1.25801	Thermus thermophilus HB8	TTHB146
TT5igR0031_at	0.22319	0.106	-1.88527	-5.68837	-0.604477	Thermus thermophilus HB8
TT5orR4184_at	0.223494	0.106	1.88388	-5.6903	0.56603	Thermus thermophilus HB8	TTHB184
TT5orR0593_at	0.223605	0.106	1.88311	-5.69137	0.354287	Thermus thermophilus HB8	TTHA0593
TT5orR1898_at	0.223819	0.106	1.882	-5.6929	0.484217	Thermus thermophilus HB8	TTHA1898
TT5orR0789_at	0.2256	0.107	1.87597	-5.70127	0.305312	Thermus thermophilus HB8	TTHA0789
TT5orF7019_at	0.226747	0.108	-1.87158	-5.70735	-1.5335	Thermus thermophilus HB8	TTHY7019
TT5igF4036_at	0.226747	0.108	1.87153	-5.70741	0.497982	Thermus thermophilus HB8
TT5igR0458_at	0.227153	0.108	-1.86984	-5.70975	-1.32912	Thermus thermophilus HB8
TT5orR0932_at	0.227697	0.109	1.86773	-5.71268	0.432975	Thermus thermophilus HB8	TTHA0932
TT5orF0866_at	0.227765	0.109	1.86709	-5.71356	0.322236	Thermus thermophilus HB8	TTHA0866
TT5orR0694_at	0.228166	0.109	-1.86542	-5.71587	-0.352263	Thermus thermophilus HB8	TTHA0694
TT5igF4020_at	0.228518	0.109	1.86361	-5.71838	0.376892	Thermus thermophilus HB8
TT5igR0349_at	0.228518	0.109	-1.86313	-5.71904	-0.660672	Thermus thermophilus HB8
TT5igR0046_at	0.228518	0.109	-1.86306	-5.71914	-0.33903	Thermus thermophilus HB8
TT5igF0633_at	0.229956	0.11	-1.8582	-5.72586	-0.751121	Thermus thermophilus HB8
TT5orR0536_at	0.230555	0.11	1.85593	-5.72899	0.35239	Thermus thermophilus HB8	TTHA0536
TT5igF0193_at	0.231036	0.111	-1.85404	-5.73161	-0.382717	Thermus thermophilus HB8
TT5igF4014_at	0.231875	0.111	-1.85105	-5.73574	-0.326803	Thermus thermophilus HB8
TT5orF1624_at	0.231938	0.111	-1.85043	-5.73659	-0.252577	Thermus thermophilus HB8	TTHA1624
TT5orR4018_at	0.233241	0.112	-1.84605	-5.74264	-0.442275	Thermus thermophilus HB8	TTHB018
TT5orR0236_at	0.233807	0.112	-1.84391	-5.74559	-0.359151	Thermus thermophilus HB8	TTHA0236
TT5orR0923_at	0.234055	0.113	1.84274	-5.7472	1.21621	Thermus thermophilus HB8	TTHA0923
TT5orF4052_at	0.234172	0.113	-1.84196	-5.74827	-0.747475	Thermus thermophilus HB8	TTHB052
TT5orR0598_at	0.234827	0.113	1.83944	-5.75174	0.375405	Thermus thermophilus HB8	TTHA0598
TT5orR1442_at	0.234827	0.113	-1.83914	-5.75216	-0.272892	Thermus thermophilus HB8	TTHA1442
TT5igR0057_at	0.235293	0.113	1.83732	-5.75467	0.58229	Thermus thermophilus HB8
TT5igR7023_at	0.237238	0.114	-1.83074	-5.76372	-0.634035	Thermus thermophilus HB8
TT5igF0657_at	0.237238	0.114	-1.83065	-5.76385	-0.45867	Thermus thermophilus HB8
TT5igR7010_at	0.237269	0.115	-1.83005	-5.76467	-1.16847	Thermus thermophilus HB8
TT5orF7016_at	0.237269	0.115	-1.82972	-5.76513	-1.77398	Thermus thermophilus HB8	TTHY7016
AFFX-BioB-M_at	0.23768	0.115	1.82799	-5.76751	0.323856	E. coli	NA
TT5igF0093_at	0.23768	0.115	1.8274	-5.76832	0.620942	Thermus thermophilus HB8
TT5orR0601_at	0.23768	0.115	-1.82723	-5.76855	-0.331042	Thermus thermophilus HB8	TTHA0601
TT5igR0231_at	0.238013	0.115	-1.82582	-5.77049	-0.307851	Thermus thermophilus HB8
TT5orR1537_at	0.2397	0.116	-1.82017	-5.77825	-0.336419	Thermus thermophilus HB8	TTHA1537
TT5orR0822_at	0.2397	0.116	1.81987	-5.77866	0.272508	Thermus thermophilus HB8	TTHA0822
TT5orR4073_at	0.2397	0.116	1.81927	-5.77949	0.56155	Thermus thermophilus HB8	TTHB073
TT5igF0653_at	0.2397	0.116	1.81914	-5.77966	0.361669	Thermus thermophilus HB8
TT5orF0031_at	0.240157	0.117	1.81738	-5.78209	0.699426	Thermus thermophilus HB8	TTHA0031
TT5igR0290_at	0.240316	0.117	1.81649	-5.78331	0.358138	Thermus thermophilus HB8
TT5orF1432_at	0.241523	0.117	1.81253	-5.78875	0.530359	Thermus thermophilus HB8	TTHA1432
TT5orR1410_at	0.24205	0.118	-1.81056	-5.79144	-0.458911	Thermus thermophilus HB8	TTHA1410
TT5orR0647_at	0.242497	0.118	-1.80862	-5.7941	-0.347596	Thermus thermophilus HB8	TTHA0647
TT5orR1204_at	0.242497	0.118	1.80842	-5.79437	0.313153	Thermus thermophilus HB8	TTHA1204
TT5orF1927_at	0.242593	0.118	1.80772	-5.79533	0.316798	Thermus thermophilus HB8	TTHA1927
TT5orF1503_at	0.245566	0.12	1.79868	-5.80772	0.369119	Thermus thermophilus HB8	TTHA1503
TT5igF0074_at	0.245694	0.12	1.79763	-5.80915	0.851066	Thermus thermophilus HB8	NA
TT5orF0451_at	0.245694	0.12	1.79748	-5.80936	0.475898	Thermus thermophilus HB8	TTHA0451
TT5orF0772_at	0.24599	0.12	-1.79621	-5.8111	-1.53522	Thermus thermophilus HB8	TTHA0772
TT5orF1599_at	0.246272	0.12	-1.79498	-5.81278	-0.243238	Thermus thermophilus HB8	TTHA1599
TT5orF4144_at	0.246599	0.121	1.79362	-5.81463	0.399077	Thermus thermophilus HB8	TTHB144
TT5igR0342_at	0.247164	0.121	-1.79159	-5.81742	-0.401175	Thermus thermophilus HB8
TT5orR0149_at	0.24799	0.121	-1.78881	-5.82121	-0.693128	Thermus thermophilus HB8	TTHA0149
TT5orF0148_at	0.248101	0.122	1.78807	-5.82221	0.295792	Thermus thermophilus HB8	TTHA0148
TT5igR0194_at	0.279302	0.144	1.71138	-5.82493	3.02556	Thermus thermophilus HB8
TT5igR0645_at	0.249012	0.122	-1.78468	-5.82684	-2.44095	Thermus thermophilus HB8
TT5orF1357_at	0.249012	0.122	-1.78438	-5.82725	-0.358054	Thermus thermophilus HB8	TTHA1357
TT5igF0066_at	0.249012	0.122	1.78423	-5.82746	0.384821	Thermus thermophilus HB8	NA
TT5igR4054_at	0.249911	0.123	-1.7805	-5.83255	-0.266686	Thermus thermophilus HB8
TT5igR0719_at	0.249911	0.123	-1.78045	-5.83261	-0.370482	Thermus thermophilus HB8
TT5orR0479_at	0.249911	0.123	-1.78044	-5.83263	-1.06096	Thermus thermophilus HB8	TTHA0479
TT5igF0640_at	0.25015	0.123	1.77935	-5.83412	0.644823	Thermus thermophilus HB8
TT5orR0356_at	0.250669	0.123	-1.77746	-5.83669	-0.281466	Thermus thermophilus HB8	TTHA0356
TT5igR0110_at	0.251374	0.124	-1.77506	-5.83997	-1.71582	Thermus thermophilus HB8
TT5orR0762_at	0.251586	0.124	1.77405	-5.84134	0.258549	Thermus thermophilus HB8	TTHA0762
TT5orR0394_at	0.252065	0.124	1.77229	-5.84374	0.375712	Thermus thermophilus HB8	TTHA0394
TT5orR1456_at	0.253438	0.125	1.76802	-5.84955	0.266786	Thermus thermophilus HB8	TTHA1456
TT5igR0100_at	0.253704	0.125	1.76686	-5.85112	1.49313	Thermus thermophilus HB8
TT5igR7043_at	0.253982	0.125	-1.76568	-5.85274	-1.11822	Thermus thermophilus HB8
TT5igF0078_at	0.254144	0.126	-1.7645	-5.85434	-0.430413	Thermus thermophilus HB8
TT5orR1105_at	0.254144	0.126	-1.7644	-5.85447	-0.521241	Thermus thermophilus HB8	TTHA1105
TT5orR4210_at	0.254279	0.126	1.76357	-5.85561	1.06009	Thermus thermophilus HB8	TTHB210
TT5orR0275_at	0.254279	0.126	-1.7632	-5.8561	-0.273732	Thermus thermophilus HB8	TTHA0275
TT5igF0624_at	0.254737	0.126	-1.76113	-5.85891	-0.282517	Thermus thermophilus HB8
TT5igF0276_at	0.254737	0.126	-1.7611	-5.85896	-0.299832	Thermus thermophilus HB8
TT5orR0287_at	0.255283	0.127	1.75914	-5.86162	0.299598	Thermus thermophilus HB8	TTHA0287
TT5igR0400_at	0.255283	0.127	-1.75876	-5.86214	-0.249274	Thermus thermophilus HB8
TT5igF0020_at	0.255462	0.127	-1.75752	-5.86382	-0.718881	Thermus thermophilus HB8	NA
TT5orR4006_at	0.255462	0.127	1.75745	-5.86392	0.326379	Thermus thermophilus HB8	TTHB006
TT5igF0338_at	0.255484	0.127	-1.75698	-5.86456	-0.445696	Thermus thermophilus HB8
TT5orR1130_at	0.256181	0.127	1.75464	-5.86774	0.372401	Thermus thermophilus HB8	TTHA1130
TT5orR1905_at	0.257608	0.128	-1.75028	-5.87365	-0.29646	Thermus thermophilus HB8	TTHA1905
TT5orF1249_at	0.258167	0.129	1.74816	-5.87653	0.513666	Thermus thermophilus HB8	TTHA1249
TT5orF4054_at	0.258167	0.129	-1.74793	-5.87684	-0.739829	Thermus thermophilus HB8	TTHB054
TT5igR7003_at	0.258595	0.129	-1.74599	-5.87946	-1.6105	Thermus thermophilus HB8
TT5orR0697_at	0.258595	0.129	1.74533	-5.88036	0.238382	Thermus thermophilus HB8	TTHA0697
TT5igR0341_at	0.258595	0.129	-1.74527	-5.88043	-1.24705	Thermus thermophilus HB8
AFFX-r2-Bs-phe-5_at	0.258595	0.129	1.74512	-5.88064	0.760028	B. subtilis	NA
TT5orF0734_at	0.258717	0.129	1.74432	-5.88172	0.232544	Thermus thermophilus HB8	TTHA0734
TT5orR1761_at	0.258717	0.129	-1.74397	-5.8822	-0.310898	Thermus thermophilus HB8	TTHA1761
TT5orR0190_at	0.260035	0.13	-1.73984	-5.88779	-0.32635	Thermus thermophilus HB8	TTHA0190
TT5orR0466_at	0.260035	0.13	1.73955	-5.88819	0.320032	Thermus thermophilus HB8	TTHA0466
TT5orR0641_at	0.260937	0.131	1.73668	-5.89207	0.270015	Thermus thermophilus HB8	TTHA0641
TT5orF1011_at	0.263639	0.132	1.72895	-5.90251	0.381794	Thermus thermophilus HB8	TTHA1011
TT5orR0589_at	0.263712	0.132	-1.72835	-5.90332	-0.931137	Thermus thermophilus HB8	TTHA0589
TT5orF4169_at	0.263954	0.133	1.72647	-5.90586	0.234298	Thermus thermophilus HB8	TTHB169
TT5igR4073_at	0.263954	0.133	1.72624	-5.90617	0.387477	Thermus thermophilus HB8
TT5igF0372_at	0.263954	0.133	1.72584	-5.90672	0.263942	Thermus thermophilus HB8
TT5igR4083_at	0.263954	0.133	-1.72572	-5.90687	-0.404861	Thermus thermophilus HB8
TT5orR0629_at	0.263954	0.133	-1.72544	-5.90725	-0.333699	Thermus thermophilus HB8	TTHA0629
TT5orF1205_at	0.263954	0.133	1.72508	-5.90774	0.272533	Thermus thermophilus HB8	TTHA1205
TT5orR4048_at	0.263954	0.133	-1.72486	-5.90803	-0.337774	Thermus thermophilus HB8	TTHB048
TT5orR1831_at	0.263979	0.133	-1.72439	-5.90867	-0.246095	Thermus thermophilus HB8	TTHA1831
TT5orF4143_at	0.264364	0.133	1.72295	-5.91061	0.37659	Thermus thermophilus HB8	TTHB143
TT5orR4043_at	0.265947	0.134	1.7183	-5.91688	0.609836	Thermus thermophilus HB8	TTHB043
TT5igF0005_at	0.266519	0.135	-1.71621	-5.91969	-0.635309	Thermus thermophilus HB8	NA
TT5orR1272_at	0.266519	0.135	-1.71596	-5.92003	-0.259393	Thermus thermophilus HB8	TTHA1272
TT5igF6008_at	0.267145	0.135	-1.71368	-5.9231	-2.84031	Thermus thermophilus HB8
TT5orR0198_at	0.267145	0.135	1.7127	-5.92442	0.260124	Thermus thermophilus HB8	TTHA0198
TT5orF4082_at	0.267145	0.135	1.71269	-5.92443	0.464079	Thermus thermophilus HB8	TTHB082
TT5orF1266_at	0.267145	0.135	1.71264	-5.9245	0.403069	Thermus thermophilus HB8	TTHA1266
TT5orF0889_at	0.267145	0.135	-1.71228	-5.92498	-0.30158	Thermus thermophilus HB8	TTHA0889
TT5igR0358_at	0.267206	0.135	1.71172	-5.92574	0.484323	Thermus thermophilus HB8
TT5orR1880_at	0.267325	0.136	1.71093	-5.9268	0.320241	Thermus thermophilus HB8	TTHA1880
TT5orF7072_at	0.267325	0.136	1.71026	-5.9277	0.992225	Thermus thermophilus HB8	TTHY7072
TT5igF7001_at	0.267325	0.136	-1.7102	-5.92779	-0.91205	Thermus thermophilus HB8
TT5igR7025_at	0.267513	0.136	-1.70929	-5.929	-1.43812	Thermus thermophilus HB8
TT5orF0377_at	0.267611	0.136	-1.70863	-5.92989	-0.625017	Thermus thermophilus HB8	TTHA0377
TT5orF0476_at	0.268146	0.136	-1.70681	-5.93234	-0.556368	Thermus thermophilus HB8	TTHA0476
TT5igR0659_at	0.268199	0.136	1.70627	-5.93307	0.597682	Thermus thermophilus HB8
TT5igR0293_at	0.268612	0.137	1.70477	-5.93508	0.377256	Thermus thermophilus HB8
TT5orF0172_at	0.268678	0.137	-1.7042	-5.93585	-0.44923	Thermus thermophilus HB8	TTHA0172
TT5orF0430_at	0.268681	0.137	1.70379	-5.9364	0.346714	Thermus thermophilus HB8	TTHA0430
TT5orF1349_at	0.269034	0.137	-1.70246	-5.93819	-0.348346	Thermus thermophilus HB8	TTHA1349
TT5igF0543_at	0.269246	0.137	1.7015	-5.93948	0.581419	Thermus thermophilus HB8
TT5orF0508_at	0.269372	0.137	-1.70076	-5.94047	-0.222211	Thermus thermophilus HB8	TTHA0508
TT5igR0222_at	0.269659	0.138	1.6996	-5.94202	0.362513	Thermus thermophilus HB8
TT5igF4055_at	0.27033	0.138	-1.69744	-5.94493	-0.669374	Thermus thermophilus HB8
TT5orF0265_at	0.271629	0.139	1.69362	-5.95004	0.288178	Thermus thermophilus HB8	TTHA0265
TT5orR0294_at	0.271906	0.139	-1.6925	-5.95155	-0.284253	Thermus thermophilus HB8	TTHA0294
TT5orF0113_at	0.272776	0.14	1.68983	-5.95513	0.38718	Thermus thermophilus HB8	TTHA0113
TT5orF1069_at	0.274075	0.14	-1.68604	-5.96019	-0.31732	Thermus thermophilus HB8	TTHA1069
TT5orF0489_at	0.275139	0.141	1.68288	-5.96442	0.296648	Thermus thermophilus HB8	TTHA0489
TT5orF0340_at	0.275343	0.141	-1.68196	-5.96566	-0.251143	Thermus thermophilus HB8	TTHA0340
TT5igF0603_at	0.275877	0.142	1.67997	-5.96831	1.41069	Thermus thermophilus HB8
TT5orF4251_at	0.275877	0.142	-1.67978	-5.96856	-0.354399	Thermus thermophilus HB8	TTHB251
TT5orF7010_at	0.276025	0.142	-1.679	-5.96961	-0.458603	Thermus thermophilus HB8	TTHY7010
TT5orR0668_at	0.277365	0.142	-1.67515	-5.97475	-0.500302	Thermus thermophilus HB8	TTHA0668
TT5orF0966_at	0.277474	0.143	-1.67413	-5.97611	-0.7407	Thermus thermophilus HB8	TTHA0966
TT5orR1965_at	0.277474	0.143	-1.67408	-5.97618	-0.285637	Thermus thermophilus HB8	TTHA1965
TT5igR7029_at	0.278109	0.143	-1.67205	-5.97888	-1.1458	Thermus thermophilus HB8
TT5igF0185_at	0.278118	0.143	-1.67163	-5.97944	-0.331035	Thermus thermophilus HB8
TT5orR0292_at	0.279028	0.144	-1.66879	-5.98323	-0.509166	Thermus thermophilus HB8	TTHA0292
TT5orR0804_at	0.279028	0.144	-1.66829	-5.9839	-0.233472	Thermus thermophilus HB8	TTHA0804
TT5igR0560_at	0.279028	0.144	1.66811	-5.98414	1.02343	Thermus thermophilus HB8
TT5orR1196_at	0.279208	0.144	1.66726	-5.98527	0.221632	Thermus thermophilus HB8	TTHA1196
TT5orF4145_at	0.279302	0.144	1.66623	-5.98665	0.516955	Thermus thermophilus HB8	TTHB145
TT5orR1210_at	0.279566	0.145	1.66516	-5.98807	0.341736	Thermus thermophilus HB8	TTHA1210
TT5orR0557_at	0.280113	0.145	1.66337	-5.99045	0.274708	Thermus thermophilus HB8	TTHA0557
TT5orR1907_at	0.280813	0.145	-1.66119	-5.99335	-0.352385	Thermus thermophilus HB8	TTHA1907
TT5orF7051_at	0.281907	0.146	-1.65802	-5.99757	-0.499007	Thermus thermophilus HB8	TTHY7051
TT5orF7025_at	0.28195	0.146	1.65719	-5.99868	1.15694	Thermus thermophilus HB8	TTHY7025
TT5igR0320_at	0.28195	0.146	1.6569	-5.99906	0.509969	Thermus thermophilus HB8
TT5orR1415_at	0.28195	0.146	-1.65673	-5.99928	-0.690692	Thermus thermophilus HB8	TTHA1415
TT5igR4057_at	0.282199	0.147	1.65536	-6.0011	1.07303	Thermus thermophilus HB8
TT5orR0971_at	0.282199	0.147	-1.65531	-6.00118	-0.56263	Thermus thermophilus HB8	TTHA0971
TT5igF0061_at	0.282199	0.147	1.65492	-6.00169	0.372211	Thermus thermophilus HB8	NA
TT5igF0085_at	0.282849	0.147	1.65256	-6.00483	0.275796	Thermus thermophilus HB8
TT5orF0474_at	0.282849	0.147	1.65249	-6.00491	0.381224	Thermus thermophilus HB8	TTHA0474
TT5orF0378_at	0.283078	0.147	-1.65152	-6.0062	-0.425069	Thermus thermophilus HB8	TTHA0378
TT5igR0283_at	0.283608	0.148	1.64979	-6.0085	0.552554	Thermus thermophilus HB8
TT5orR0487_at	0.285221	0.149	1.64535	-6.01439	0.327378	Thermus thermophilus HB8	TTHA0487
TT5igR0111_at	0.28541	0.149	-1.64402	-6.01616	-0.494825	Thermus thermophilus HB8
TT5orR1782_at	0.28541	0.149	-1.64381	-6.01644	-0.275925	Thermus thermophilus HB8	TTHA1782
TT5igR0325_at	0.28541	0.149	-1.6437	-6.01658	-1.099	Thermus thermophilus HB8
TT5orF1050_at	0.285859	0.149	1.64206	-6.01874	0.427293	Thermus thermophilus HB8	TTHA1050
TT5orF0547_at	0.285859	0.149	-1.64179	-6.0191	-0.23652	Thermus thermophilus HB8	TTHA0547
TT5igF0482_at	0.286515	0.15	1.63941	-6.02225	2.78417	Thermus thermophilus HB8
TT5orF0964_at	0.286515	0.15	-1.63937	-6.02231	-0.665491	Thermus thermophilus HB8	TTHA0964
TT5igR7042_at	0.286663	0.15	-1.63861	-6.02331	-0.979583	Thermus thermophilus HB8
TT5orF1084_at	0.286803	0.15	-1.63779	-6.02441	-0.246919	Thermus thermophilus HB8	TTHA1084
TT5orR1585_at	0.286803	0.15	1.63659	-6.02599	1.00523	Thermus thermophilus HB8	TTHA1585
TT5igR0270_at	0.286803	0.15	-1.63649	-6.02612	-0.699754	Thermus thermophilus HB8
TT5igF0242_at	0.286803	0.15	-1.63637	-6.02628	-0.301657	Thermus thermophilus HB8
TT5orF0747_at	0.286803	0.151	-1.63563	-6.02726	-0.549684	Thermus thermophilus HB8	TTHA0747
TT5orF7017_at	0.286803	0.151	-1.63532	-6.02766	-1.43937	Thermus thermophilus HB8	TTHY7017
TT5orR0682_at	0.286803	0.151	-1.63525	-6.02777	-0.355841	Thermus thermophilus HB8	TTHA0682
TT5igF0393_at	0.286803	0.151	1.63514	-6.0279	0.468146	Thermus thermophilus HB8
TT5orF1833_at	0.286976	0.151	-1.63432	-6.02899	-0.293653	Thermus thermophilus HB8	TTHA1833
TT5orR1063_at	0.288367	0.152	1.63047	-6.03407	0.237423	Thermus thermophilus HB8	TTHA1063
TT5orF1852_at	0.289686	0.152	1.62682	-6.03889	0.272947	Thermus thermophilus HB8	TTHA1852
TT5orR0648_at	0.289973	0.153	-1.62573	-6.04034	-0.431913	Thermus thermophilus HB8	TTHA0648
TT5igR0513_at	0.29023	0.153	-1.6247	-6.04169	-0.414607	Thermus thermophilus HB8
TT5igR0449_at	0.322977	0.181	1.53923	-6.04504	1.21265	Thermus thermophilus HB8
TT5igR0014_at	0.291056	0.154	-1.62191	-6.04537	-0.365147	Thermus thermophilus HB8
TT5orF0105_at	0.291056	0.154	1.6219	-6.04539	0.38618	Thermus thermophilus HB8	TTHA0105
TT5igR0223_at	0.29151	0.154	-1.62039	-6.04737	-0.425077	Thermus thermophilus HB8
TT5igF0083_at	0.291894	0.154	-1.61906	-6.04912	-1.2164	Thermus thermophilus HB8
TT5orF1600_at	0.292053	0.154	-1.61828	-6.05015	-0.240018	Thermus thermophilus HB8	TTHA1600
TT5orF0407_at	0.292547	0.155	-1.61669	-6.05225	-0.425358	Thermus thermophilus HB8	TTHA0407
TT5igR0476_at	0.292855	0.155	1.61555	-6.05375	1.44096	Thermus thermophilus HB8
TT5igR0079_at	0.292893	0.155	1.61436	-6.05531	0.36382	Thermus thermophilus HB8
TT5igR0346_at	0.292893	0.155	1.61423	-6.05549	0.530587	Thermus thermophilus HB8
TT5orF4250_at	0.292893	0.155	-1.61394	-6.05586	-1.48366	Thermus thermophilus HB8	TTHB250
TT5orR1310_at	0.292893	0.155	1.61369	-6.05619	0.394314	Thermus thermophilus HB8	TTHA1310
TT5igF0076_at	0.292893	0.155	1.61352	-6.05642	0.343022	Thermus thermophilus HB8
TT5igF0244_at	0.293654	0.156	-1.61127	-6.05937	-0.395314	Thermus thermophilus HB8
TT5orR0079_at	0.293794	0.156	-1.61055	-6.06032	-0.25708	Thermus thermophilus HB8	TTHA0079
TT5orF1922_at	0.294135	0.156	1.60933	-6.06192	0.259626	Thermus thermophilus HB8	TTHA1922
TT5orR4176_at	0.29422	0.156	-1.60874	-6.0627	-0.452142	Thermus thermophilus HB8	TTHB176
TT5igF0468_at	0.294387	0.157	1.60767	-6.06411	0.998704	Thermus thermophilus HB8
TT5orR4205_at	0.294387	0.157	1.60756	-6.06425	1.04314	Thermus thermophilus HB8	TTHB205
TT5igF0535_at	0.294707	0.157	1.6064	-6.06578	0.922472	Thermus thermophilus HB8
TT5orF1546_at	0.295594	0.157	-1.60386	-6.06911	-0.279311	Thermus thermophilus HB8	TTHA1546
TT5orF7026_at	0.295685	0.158	-1.60294	-6.07031	-0.356387	Thermus thermophilus HB8	TTHY7026
TT5orF1285_at	0.295685	0.158	1.60287	-6.0704	0.319599	Thermus thermophilus HB8	TTHA1285
TT5igF0166_at	0.295847	0.158	1.60209	-6.07142	0.549828	Thermus thermophilus HB8
TT5orF0447_at	0.297451	0.159	1.59783	-6.077	0.282555	Thermus thermophilus HB8	TTHA0447
TT5igR0712_at	0.297454	0.159	1.59744	-6.07752	0.361997	Thermus thermophilus HB8
TT5orR1657_at	0.298428	0.159	1.59471	-6.08109	0.288767	Thermus thermophilus HB8	TTHA1657
TT5orR0857_at	0.299476	0.16	-1.59182	-6.08488	-0.341795	Thermus thermophilus HB8	TTHA0857
TT5igR4024_at	0.299612	0.16	1.59111	-6.08581	0.429214	Thermus thermophilus HB8
TT5orF1856_at	0.30009	0.161	-1.58941	-6.08802	-0.3046	Thermus thermophilus HB8	TTHA1856
TT5igR0019_at	0.30009	0.161	1.5892	-6.0883	0.408263	Thermus thermophilus HB8
TT5orR7093_at	0.300131	0.161	1.58871	-6.08893	0.261386	Thermus thermophilus HB8	TTHY7093
TT5igF0560_at	0.300359	0.161	-1.58779	-6.09014	-0.295633	Thermus thermophilus HB8
TT5orF0720_at	0.300462	0.161	-1.58716	-6.09097	-0.247365	Thermus thermophilus HB8	TTHA0720
TT5orF4061_at	0.30082	0.161	-1.58592	-6.09258	-0.701804	Thermus thermophilus HB8	TTHB061
TT5igF0417_at	0.302315	0.162	1.58198	-6.09772	0.407002	Thermus thermophilus HB8
TT5orF1257_at	0.302619	0.163	-1.58048	-6.09968	-0.313129	Thermus thermophilus HB8	TTHA1257
TT5igR0209_at	0.302619	0.163	1.58046	-6.0997	0.366846	Thermus thermophilus HB8
TT5orR0823_at	0.302619	0.163	1.57978	-6.1006	0.284247	Thermus thermophilus HB8	TTHA0823
TT5orR1883_at	0.302619	0.163	1.57973	-6.10065	0.370838	Thermus thermophilus HB8	TTHA1883
TT5igR0196_at	0.303382	0.163	1.57754	-6.10351	0.385097	Thermus thermophilus HB8
TT5igF0228_at	0.30429	0.164	-1.57502	-6.1068	-1.09192	Thermus thermophilus HB8
TT5igR7022_at	0.304852	0.164	-1.57311	-6.10928	-0.767757	Thermus thermophilus HB8
TT5igR0468_at	0.304852	0.164	-1.57293	-6.10952	-0.564753	Thermus thermophilus HB8
TT5orR1156_at	0.306143	0.165	1.56948	-6.114	0.280543	Thermus thermophilus HB8	TTHA1156
TT5igR0123_at	0.306143	0.165	1.56902	-6.1146	0.316959	Thermus thermophilus HB8
TT5igR0604_at	0.306143	0.165	1.56875	-6.11495	0.32001	Thermus thermophilus HB8
TT5igR0138_at	0.307525	0.166	1.56513	-6.11965	0.470471	Thermus thermophilus HB8
TT5orF6003_at	0.307759	0.166	1.56421	-6.12085	0.76369	Thermus thermophilus HB8	TTHC003
TT5orF6009_at	0.307764	0.166	-1.56381	-6.12136	-0.3822	Thermus thermophilus HB8	TTHC009
TT5orF0954_at	0.30848	0.167	1.56176	-6.12402	0.215509	Thermus thermophilus HB8	TTHA0954
TT5orR0498_at	0.308584	0.167	1.56114	-6.12483	0.346138	Thermus thermophilus HB8	TTHA0498
TT5orR1591_at	0.31001	0.168	1.55638	-6.131	0.323451	Thermus thermophilus HB8	TTHA1591
TT5igR7054_at	0.31001	0.168	-1.5562	-6.13122	-0.860828	Thermus thermophilus HB8
TT5igF0604_at	0.31001	0.168	-1.55593	-6.13158	-0.219981	Thermus thermophilus HB8
TT5orF0602_at	0.31001	0.168	1.55571	-6.13186	0.377017	Thermus thermophilus HB8	TTHA0602
TT5orR0326_at	0.31001	0.168	-1.55527	-6.13243	-0.316845	Thermus thermophilus HB8	TTHA0326
TT5orR1426_at	0.31001	0.169	1.55497	-6.13282	0.333221	Thermus thermophilus HB8	TTHA1426
TT5orF1092_at	0.31001	0.169	1.55487	-6.13295	0.2098	Thermus thermophilus HB8	TTHA1092
TT5igR0566_at	0.31001	0.169	-1.55458	-6.13332	-0.352391	Thermus thermophilus HB8
TT5orR0837_at	0.31001	0.169	-1.55438	-6.13359	-1.26759	Thermus thermophilus HB8	TTHA0837
TT5orR0596_at	0.31001	0.169	1.55403	-6.13403	0.527898	Thermus thermophilus HB8	TTHA0596
TT5orF1253_at	0.31072	0.169	1.55201	-6.13665	0.537424	Thermus thermophilus HB8	TTHA1253
TT5orF0961_at	0.311582	0.17	-1.54964	-6.13972	-0.829267	Thermus thermophilus HB8	TTHA0961
TT5orF1954_at	0.31164	0.17	1.54912	-6.14038	0.331711	Thermus thermophilus HB8	TTHA1954
TT5orF6005_at	0.311891	0.17	-1.54817	-6.14162	-0.322237	Thermus thermophilus HB8	TTHC005
TT5igR0274_at	0.312639	0.171	1.54607	-6.14433	2.23248	Thermus thermophilus HB8
TT5orF0365_at	0.313374	0.171	-1.544	-6.147	-0.32688	Thermus thermophilus HB8	TTHA0365
TT5igR0641_at	0.313387	0.171	1.54359	-6.14753	0.366145	Thermus thermophilus HB8
TT5igR0691_at	0.313529	0.171	1.54289	-6.14843	0.292658	Thermus thermophilus HB8
TT5orR0110_at	0.313687	0.172	1.54215	-6.14939	0.339533	Thermus thermophilus HB8	TTHA0110
TT5igR0446_at	0.314951	0.173	1.53827	-6.15438	0.686298	Thermus thermophilus HB8
TT5igR0692_at	0.314951	0.173	1.53818	-6.1545	0.31052	Thermus thermophilus HB8
TT5orF1246_at	0.314951	0.173	1.53812	-6.15458	0.222313	Thermus thermophilus HB8	TTHA1246
TT5igF0357_at	0.315108	0.173	1.53739	-6.15552	0.968821	Thermus thermophilus HB8
TT5orF7059_at	0.315263	0.173	-1.53666	-6.15646	-0.342441	Thermus thermophilus HB8	TTHY7059
TT5orF1468_at	0.315354	0.173	-1.53607	-6.15722	-0.390704	Thermus thermophilus HB8	TTHA1468
TT5igR0008_at	0.316007	0.174	-1.53403	-6.15984	-0.763904	Thermus thermophilus HB8
TT5igF0656_at	0.316007	0.174	1.53356	-6.16045	1.4896	Thermus thermophilus HB8
TT5igR0201_at	0.316007	0.174	1.53345	-6.16059	0.348493	Thermus thermophilus HB8
TT5orR0419_at	0.316266	0.174	1.53244	-6.16189	0.224073	Thermus thermophilus HB8	TTHA0419
TT5orF1611_at	0.316266	0.174	-1.53181	-6.1627	-0.313537	Thermus thermophilus HB8	TTHA1611
TT5orF0071_at	0.316266	0.174	1.53097	-6.16378	0.434023	Thermus thermophilus HB8	TTHA0071
TT5orF0530_at	0.316266	0.174	1.53088	-6.16389	0.319031	Thermus thermophilus HB8	TTHA0530
TT5orR0710_at	0.316266	0.174	1.53068	-6.16415	0.204396	Thermus thermophilus HB8	TTHA0710
TT5igR0092_at	0.316266	0.174	-1.53061	-6.16424	-0.695067	Thermus thermophilus HB8
TT5orR0945_at	0.316584	0.175	1.52932	-6.1659	0.253709	Thermus thermophilus HB8	TTHA0945
TT5orF0791_at	0.316584	0.175	1.52892	-6.16641	0.445749	Thermus thermophilus HB8	TTHA0791
TT5igR7062_at	0.316584	0.175	-1.52803	-6.16755	-0.843412	Thermus thermophilus HB8
TT5orF4055_at	0.316584	0.175	-1.52796	-6.16764	-0.686966	Thermus thermophilus HB8	TTHB055
TT5igF0134_at	0.316584	0.175	1.52777	-6.16789	0.396048	Thermus thermophilus HB8
TT5orF0032_at	0.316584	0.175	-1.52765	-6.16805	-0.321794	Thermus thermophilus HB8	TTHA0032
TT5orF4168_at	0.317512	0.176	1.52479	-6.17172	0.22403	Thermus thermophilus HB8	TTHB168
TT5igR0199_at	0.317512	0.176	-1.52479	-6.17172	-0.304236	Thermus thermophilus HB8
TT5orF4051_at	0.317577	0.176	-1.52427	-6.17239	-0.517988	Thermus thermophilus HB8	TTHB051
TT5igR0339_at	0.317679	0.176	-1.52344	-6.17344	-0.513143	Thermus thermophilus HB8
TT5igR0583_at	0.317679	0.176	1.52329	-6.17364	1.48907	Thermus thermophilus HB8
TT5orF0367_at	0.317813	0.176	-1.52177	-6.17559	-0.244384	Thermus thermophilus HB8	TTHA0367
TT5orF1054_at	0.317813	0.176	1.52177	-6.17559	0.309398	Thermus thermophilus HB8	TTHA1054
TT5igF0635_at	0.317813	0.177	1.52174	-6.17563	0.261439	Thermus thermophilus HB8
TT5igR0779_at	0.317813	0.177	-1.5215	-6.17594	-0.836547	Thermus thermophilus HB8
TT5igR0233_at	0.318057	0.177	1.52057	-6.17712	0.42378	Thermus thermophilus HB8
TT5igF0205_at	0.31832	0.177	1.51936	-6.17868	0.963306	Thermus thermophilus HB8
TT5orR1866_at	0.31832	0.177	-1.51923	-6.17884	-0.26079	Thermus thermophilus HB8	TTHA1866
TT5igR0094_at	0.31835	0.177	-1.51879	-6.1794	-2.23956	Thermus thermophilus HB8
TT5igF0222_at	0.318624	0.177	1.5178	-6.18067	0.302318	Thermus thermophilus HB8
TT5igF0266_at	0.318921	0.178	1.51666	-6.18214	1.15158	Thermus thermophilus HB8
TT5orF1311_at	0.318921	0.178	1.51639	-6.18248	0.217589	Thermus thermophilus HB8	TTHA1311
TT5orR0560_at	0.3194	0.178	-1.51442	-6.185	-0.369788	Thermus thermophilus HB8	TTHA0560
TT5orR1824_at	0.3194	0.178	1.51438	-6.18505	0.375415	Thermus thermophilus HB8	TTHA1824
TT5orF7050_at	0.3194	0.178	-1.51419	-6.18529	-0.923605	Thermus thermophilus HB8	TTHY7050
TT5orF0777_at	0.319648	0.179	1.51326	-6.18648	0.497718	Thermus thermophilus HB8	TTHA0777
TT5orF0563_at	0.320824	0.179	-1.51024	-6.19034	-0.243586	Thermus thermophilus HB8	TTHA0563
TT5orR0882_at	0.320844	0.179	-1.50983	-6.19087	-0.28271	Thermus thermophilus HB8	TTHA0882
TT5igR0182_at	0.321601	0.18	1.50761	-6.19371	1.06984	Thermus thermophilus HB8
TT5igR0373_at	0.321601	0.18	-1.50739	-6.19399	-0.329215	Thermus thermophilus HB8
TT5orF1386_at	0.321668	0.18	1.50686	-6.19465	0.224997	Thermus thermophilus HB8	TTHA1386
TT5igF0022_at	0.323887	0.182	-1.50116	-6.20193	-0.402115	Thermus thermophilus HB8	NA
TT5orF4161_at	0.326127	0.183	1.49581	-6.20874	0.51668	Thermus thermophilus HB8	TTHB161
TT5igR0772_at	0.326661	0.183	1.49425	-6.21072	0.759961	Thermus thermophilus HB8
TT5igF0010_at	0.326737	0.183	1.49372	-6.2114	0.278345	Thermus thermophilus HB8	NA
TT5orF0523_at	0.327192	0.184	-1.49234	-6.21315	-0.337709	Thermus thermophilus HB8	TTHA0523
TT5igR0572_at	0.328068	0.184	-1.49004	-6.21607	-1.00771	Thermus thermophilus HB8
TT5orF4199_at	0.328755	0.185	1.48764	-6.21911	0.253144	Thermus thermophilus HB8	TTHB199
TT5igR0022_at	0.328755	0.185	-1.48758	-6.21919	-0.261058	Thermus thermophilus HB8
TT5igR7065_at	0.328755	0.185	-1.48725	-6.21961	-0.918186	Thermus thermophilus HB8
TT5igR0423_at	0.328755	0.185	-1.48705	-6.21986	-0.911982	Thermus thermophilus HB8
TT5orF1937_at	0.329342	0.186	1.48539	-6.22197	0.207492	Thermus thermophilus HB8	TTHA1937
TT5orR0189_at	0.329942	0.186	1.48342	-6.22446	0.224243	Thermus thermophilus HB8	TTHA0189
TT5orR1828_at	0.329942	0.186	-1.48334	-6.22457	-0.232524	Thermus thermophilus HB8	TTHA1828
TT5orF1787_at	0.330114	0.186	1.48259	-6.22551	0.339791	Thermus thermophilus HB8	TTHA1787
TT5orF0390_at	0.331201	0.187	1.47984	-6.22899	0.355499	Thermus thermophilus HB8	TTHA0390
TT5igR0249_at	0.331304	0.187	1.47925	-6.22974	0.302253	Thermus thermophilus HB8
TT5igF0380_at	0.332207	0.188	1.47691	-6.2327	0.31204	Thermus thermophilus HB8
TT5orF0545_at	0.332394	0.188	1.47579	-6.23411	0.209782	Thermus thermophilus HB8	TTHA0545
TT5igF4027_at	0.332394	0.188	1.47577	-6.23414	2.37491	Thermus thermophilus HB8
TT5igR4013_at	0.332818	0.188	1.47448	-6.23577	0.381838	Thermus thermophilus HB8
TT5igF0227_at	0.332865	0.189	-1.47401	-6.23636	-0.397201	Thermus thermophilus HB8
TT5orR1893_at	0.332983	0.189	-1.47314	-6.23746	-0.24436	Thermus thermophilus HB8	TTHA1893
TT5igR0489_at	0.332983	0.189	1.47302	-6.23761	0.224309	Thermus thermophilus HB8
TT5orR0486_at	0.333188	0.189	1.47221	-6.23864	0.453393	Thermus thermophilus HB8	TTHA0486
TT5igR0471_at	0.334131	0.19	1.46979	-6.24169	1.31728	Thermus thermophilus HB8
TT5igF0651_at	0.335002	0.19	1.46754	-6.24453	0.489637	Thermus thermophilus HB8
TT5orR0786_at	0.335279	0.19	1.46657	-6.24574	0.358359	Thermus thermophilus HB8	TTHA0786
TT5orF0083_at	0.33568	0.191	-1.46534	-6.2473	-0.219377	Thermus thermophilus HB8	TTHA0083
TT5orR0685_at	0.336348	0.191	1.46353	-6.24957	0.772925	Thermus thermophilus HB8	TTHA0685
TT5igR0646_at	0.336616	0.192	1.46259	-6.25076	0.513962	Thermus thermophilus HB8
TT5igR0395_at	0.33669	0.192	1.46206	-6.25142	1.05843	Thermus thermophilus HB8
TT5igF0304_at	0.336701	0.192	1.46167	-6.25191	0.549506	Thermus thermophilus HB8
TT5igF0168_at	0.338186	0.193	-1.45811	-6.25638	-0.759494	Thermus thermophilus HB8
AFFX-TrpnX-3_at	0.338331	0.193	1.45744	-6.25723	1.02412	B. subtilis	NA
TT5orR1043_at	0.339311	0.194	1.45497	-6.26033	0.486031	Thermus thermophilus HB8	TTHA1043
TT5orR0445_at	0.340516	0.194	1.45203	-6.26402	0.27403	Thermus thermophilus HB8	TTHA0445
TT5orR1455_at	0.340617	0.194	1.45145	-6.26474	0.199158	Thermus thermophilus HB8	TTHA1455
TT5orR0681_at	0.340809	0.195	1.45068	-6.26571	0.296307	Thermus thermophilus HB8	TTHA0681
TT5orF7086_at	0.340916	0.195	-1.45008	-6.26646	-0.597758	Thermus thermophilus HB8	TTHY7086
TT5orF0613_at	0.341449	0.195	1.44858	-6.26833	0.329528	Thermus thermophilus HB8	TTHA0613
TT5orF0015_at	0.341576	0.195	1.44795	-6.26913	0.273639	Thermus thermophilus HB8	TTHA0015
TT5orR4128_at	0.342016	0.196	-1.44665	-6.27075	-0.785151	Thermus thermophilus HB8	TTHB128
[truncated: 1,493 more rows]
